# Supplementary material for: Chloroplast acquisition without the gene transfer in kleptoplastic sea slugs, Plakobranchus ocellatus
Source: eLife journal article supplement (doi:10.7554/elife.60176), 2021-04-26
Supplement: fig3-data2 [file TBLASTN hit result .xlsx]

## Sheet: Sheet1
TBLASTN hit result (query; selected photosynthesis-relating genes, DB; kleptoplast DNAs and C. lentillifera genome)
Query			Target database			tblastn output ( fmt6 )
query species	gene ID		Database description	INSDC ID		Hit assmbly	pident	length	mismatch	gapopen	qstart	qend	sstart	send	evalue
Brhy	TRINITY_DN10061_c0_g1_i1|m.5314		Nuclear genome from Caulerpa lentillifera			Cale_scf_19	64.017	478	152	2	97	554	169640	171073	0
Brhy	TRINITY_DN10061_c0_g1_i1|m.5314		Nuclear genome from Caulerpa lentillifera			Cale_scf_19	66.667	33	11	0	65	97	169501	169599	3.09e-07
Brhy	TRINITY_DN10061_c0_g1_i1|m.5314		Nuclear genome from Caulerpa lentillifera			Cale_scf_19	22.121	330	191	14	160	480	306353	307171	4.8e-05
Brhy	TRINITY_DN10061_c0_g1_i1|m.5314		Nuclear genome from Caulerpa lentillifera			Cale_scf_19	23.005	213	110	7	286	481	85945	85418	0.005
Brhy	TRINITY_DN10061_c0_g1_i1|m.5314		Nuclear genome from Caulerpa lentillifera			Cale_scf_19	40.426	47	27	1	286	332	794983	794846	0.021
Brhy	TRINITY_DN10061_c0_g1_i1|m.5314		Nuclear genome from Caulerpa lentillifera			Cale_scf_19	42.5	40	22	1	289	328	130427	130311	0.065
Brhy	TRINITY_DN10061_c0_g1_i1|m.5314		Nuclear genome from Caulerpa lentillifera			Cale_scf_19	21.134	194	122	8	151	337	577767	578276	0.74
Brhy	TRINITY_DN10061_c0_g1_i1|m.5314		Nuclear genome from Caulerpa lentillifera			Cale_scf_19	35.714	28	18	0	287	314	54910	54827	1.8
Brhy	TRINITY_DN10061_c0_g1_i1|m.5314		Nuclear genome from Caulerpa lentillifera			Cale_scf_9	33.618	351	193	7	157	483	70609	69605	1.88e-51
Brhy	TRINITY_DN10061_c0_g1_i1|m.5314		Nuclear genome from Caulerpa lentillifera			Cale_scf_9	29.577	71	49	1	283	353	830402	830193	5.32e-05
Brhy	TRINITY_DN10061_c0_g1_i1|m.5314		Nuclear genome from Caulerpa lentillifera			Cale_scf_9	43.75	48	26	1	285	332	745531	745391	0.000414
Brhy	TRINITY_DN10061_c0_g1_i1|m.5314		Nuclear genome from Caulerpa lentillifera			Cale_scf_9	23.438	128	68	4	280	399	613236	612919	0.027
Brhy	TRINITY_DN10061_c0_g1_i1|m.5314		Nuclear genome from Caulerpa lentillifera			Cale_scf_9	25.926	54	37	1	284	334	636256	636095	0.069
Brhy	TRINITY_DN10061_c0_g1_i1|m.5314		Nuclear genome from Caulerpa lentillifera			Cale_scf_9	59.091	22	9	0	293	314	789790	789725	1.4
Brhy	TRINITY_DN10061_c0_g1_i1|m.5314		Nuclear genome from Caulerpa lentillifera			Cale_scf_34	33.74	246	108	6	282	477	161651	162373	2.63e-29
Brhy	TRINITY_DN10061_c0_g1_i1|m.5314		Nuclear genome from Caulerpa lentillifera			Cale_scf_34	46.875	32	17	0	283	314	180911	180816	0.21
Brhy	TRINITY_DN10061_c0_g1_i1|m.5314		Nuclear genome from Caulerpa lentillifera			Cale_scf_26	22.907	227	120	9	272	488	187867	188412	4.47e-09
Brhy	TRINITY_DN10061_c0_g1_i1|m.5314		Nuclear genome from Caulerpa lentillifera			Cale_scf_26	22.28	193	106	6	286	476	215710	216162	5.18e-05
Brhy	TRINITY_DN10061_c0_g1_i1|m.5314		Nuclear genome from Caulerpa lentillifera			Cale_scf_26	33.803	71	45	2	283	353	534761	534967	0.000548
Brhy	TRINITY_DN10061_c0_g1_i1|m.5314		Nuclear genome from Caulerpa lentillifera			Cale_scf_26	28.226	124	69	6	231	347	303014	303346	0.006
Brhy	TRINITY_DN10061_c0_g1_i1|m.5314		Nuclear genome from Caulerpa lentillifera			Cale_scf_26	42.308	26	15	0	289	314	134051	134128	3.8
Brhy	TRINITY_DN10061_c0_g1_i1|m.5314		Nuclear genome from Caulerpa lentillifera			Cale_scf_26	32.353	34	23	0	284	317	359841	359740	6.9
Brhy	TRINITY_DN10061_c0_g1_i1|m.5314		Nuclear genome from Caulerpa lentillifera			Cale_scf_33	24.88	209	118	6	283	476	71719	71165	7.64e-09
Brhy	TRINITY_DN10061_c0_g1_i1|m.5314		Nuclear genome from Caulerpa lentillifera			Cale_scf_33	26.522	230	125	8	265	476	11039	10428	8.7e-08
Brhy	TRINITY_DN10061_c0_g1_i1|m.5314		Nuclear genome from Caulerpa lentillifera			Cale_scf_33	46	50	24	1	283	329	23409	23558	1.95e-05
Brhy	TRINITY_DN10061_c0_g1_i1|m.5314		Nuclear genome from Caulerpa lentillifera			Cale_scf_33	32	50	33	1	278	327	49925	50071	1.4
Brhy	TRINITY_DN10061_c0_g1_i1|m.5314		Nuclear genome from Caulerpa lentillifera			Cale_scf_17	23.944	213	120	7	280	476	129608	130168	2.86e-08
Brhy	TRINITY_DN10061_c0_g1_i1|m.5314		Nuclear genome from Caulerpa lentillifera			Cale_scf_17	26.582	79	52	1	246	318	674838	674602	0.004
Brhy	TRINITY_DN10061_c0_g1_i1|m.5314		Nuclear genome from Caulerpa lentillifera			Cale_scf_17	27.273	44	31	1	284	327	278929	278801	1.1
Brhy	TRINITY_DN10061_c0_g1_i1|m.5314		Nuclear genome from Caulerpa lentillifera			Cale_scf_16	24.889	225	112	8	286	499	810815	810279	1.2e-07
Brhy	TRINITY_DN10061_c0_g1_i1|m.5314		Nuclear genome from Caulerpa lentillifera			Cale_scf_16	26.923	130	72	5	287	412	518307	518639	4.19e-05
Brhy	TRINITY_DN10061_c0_g1_i1|m.5314		Nuclear genome from Caulerpa lentillifera			Cale_scf_16	23.711	194	102	9	288	476	636547	637005	0.000816
Brhy	TRINITY_DN10061_c0_g1_i1|m.5314		Nuclear genome from Caulerpa lentillifera			Cale_scf_16	36.957	46	27	1	286	329	445958	446095	0.005
Brhy	TRINITY_DN10061_c0_g1_i1|m.5314		Nuclear genome from Caulerpa lentillifera			Cale_scf_16	20.976	205	111	10	287	484	380059	379577	0.058
Brhy	TRINITY_DN10061_c0_g1_i1|m.5314		Nuclear genome from Caulerpa lentillifera			Cale_scf_16	37.778	45	26	1	285	327	273085	272951	0.24
Brhy	TRINITY_DN10061_c0_g1_i1|m.5314		Nuclear genome from Caulerpa lentillifera			Cale_scf_16	22.727	220	133	10	117	329	721221	721790	3.9
Brhy	TRINITY_DN10061_c0_g1_i1|m.5314		Nuclear genome from Caulerpa lentillifera			Cale_scf_23	46.667	45	24	0	283	327	54664	54530	2.63e-06
Brhy	TRINITY_DN10061_c0_g1_i1|m.5314		Nuclear genome from Caulerpa lentillifera			Cale_scf_23	45.714	35	19	0	293	327	100102	99998	0.001
Brhy	TRINITY_DN10061_c0_g1_i1|m.5314		Nuclear genome from Caulerpa lentillifera			Cale_scf_23	21.509	265	156	12	153	399	253594	252902	0.73
Brhy	TRINITY_DN10061_c0_g1_i1|m.5314		Nuclear genome from Caulerpa lentillifera			Cale_scf_15	24.171	211	116	8	283	476	571843	572394	1.27e-05
Brhy	TRINITY_DN10061_c0_g1_i1|m.5314		Nuclear genome from Caulerpa lentillifera			Cale_scf_15	46.512	43	22	1	280	321	626344	626472	0.001
Brhy	TRINITY_DN10061_c0_g1_i1|m.5314		Nuclear genome from Caulerpa lentillifera			Cale_scf_15	46.429	28	15	0	284	311	655332	655249	0.002
Brhy	TRINITY_DN10061_c0_g1_i1|m.5314		Nuclear genome from Caulerpa lentillifera			Cale_scf_15	19.91	221	127	6	321	529	655177	654629	0.002
Brhy	TRINITY_DN10061_c0_g1_i1|m.5314		Nuclear genome from Caulerpa lentillifera			Cale_scf_15	27.2	125	78	4	215	332	907463	907819	0.021
Brhy	TRINITY_DN10061_c0_g1_i1|m.5314		Nuclear genome from Caulerpa lentillifera			Cale_scf_15	46.154	39	21	0	283	321	267552	267436	0.021
Brhy	TRINITY_DN10061_c0_g1_i1|m.5314		Nuclear genome from Caulerpa lentillifera			Cale_scf_15	42.857	35	18	1	285	317	214524	214420	0.83
Brhy	TRINITY_DN10061_c0_g1_i1|m.5314		Nuclear genome from Caulerpa lentillifera			Cale_scf_15	46.667	30	15	1	300	329	464672	464758	0.87
Brhy	TRINITY_DN10061_c0_g1_i1|m.5314		Nuclear genome from Caulerpa lentillifera			Cale_scf_24	25.991	227	98	10	283	476	407520	408089	2.31e-05
Brhy	TRINITY_DN10061_c0_g1_i1|m.5314		Nuclear genome from Caulerpa lentillifera			Cale_scf_24	37.288	59	31	3	284	342	359625	359783	0.011
Brhy	TRINITY_DN10061_c0_g1_i1|m.5314		Nuclear genome from Caulerpa lentillifera			Cale_scf_24	24.194	124	81	4	215	331	17049	16696	1.4
Brhy	TRINITY_DN10061_c0_g1_i1|m.5314		Nuclear genome from Caulerpa lentillifera			Cale_scf_20	20.603	199	115	6	287	480	324176	323694	2.98e-05
Brhy	TRINITY_DN10061_c0_g1_i1|m.5314		Nuclear genome from Caulerpa lentillifera			Cale_scf_20	19.62	158	104	3	159	314	102401	102811	0.036
Brhy	TRINITY_DN10061_c0_g1_i1|m.5314		Nuclear genome from Caulerpa lentillifera			Cale_scf_20	26.389	72	48	3	284	353	168556	168350	0.11
Brhy	TRINITY_DN10061_c0_g1_i1|m.5314		Nuclear genome from Caulerpa lentillifera			Cale_scf_20	34.694	49	23	1	285	333	471757	471638	0.15
Brhy	TRINITY_DN10061_c0_g1_i1|m.5314		Nuclear genome from Caulerpa lentillifera			Cale_scf_20	37.778	45	27	1	284	327	780088	779954	0.22
Brhy	TRINITY_DN10061_c0_g1_i1|m.5314		Nuclear genome from Caulerpa lentillifera			Cale_scf_20	32.558	43	27	1	287	327	413241	413113	0.39
Brhy	TRINITY_DN10061_c0_g1_i1|m.5314		Nuclear genome from Caulerpa lentillifera			Cale_scf_14	44	50	25	1	283	329	143189	143040	3.69e-05
Brhy	TRINITY_DN10061_c0_g1_i1|m.5314		Nuclear genome from Caulerpa lentillifera			Cale_scf_14	40	45	27	0	283	327	125506	125372	0.000455
Brhy	TRINITY_DN10061_c0_g1_i1|m.5314		Nuclear genome from Caulerpa lentillifera			Cale_scf_14	26.984	189	101	7	157	314	773363	772815	0.011
Brhy	TRINITY_DN10061_c0_g1_i1|m.5314		Nuclear genome from Caulerpa lentillifera			Cale_scf_14	30	50	35	0	433	482	25675	25526	0.017
Brhy	TRINITY_DN10061_c0_g1_i1|m.5314		Nuclear genome from Caulerpa lentillifera			Cale_scf_14	24.432	176	104	7	150	320	815198	814743	0.024
Brhy	TRINITY_DN10061_c0_g1_i1|m.5314		Nuclear genome from Caulerpa lentillifera			Cale_scf_14	30.645	62	39	2	284	342	174461	174279	0.92
Brhy	TRINITY_DN10061_c0_g1_i1|m.5314		Nuclear genome from Caulerpa lentillifera			Cale_scf_14	56.522	23	10	0	454	476	142706	142638	1.2
Brhy	TRINITY_DN10061_c0_g1_i1|m.5314		Nuclear genome from Caulerpa lentillifera			Cale_scf_14	25.287	87	60	2	240	323	509841	509587	6
Brhy	TRINITY_DN10061_c0_g1_i1|m.5314		Nuclear genome from Caulerpa lentillifera			Cale_scf_14	28.205	39	28	0	286	324	505577	505461	7.9
Brhy	TRINITY_DN10061_c0_g1_i1|m.5314		Nuclear genome from Caulerpa lentillifera			Cale_scf_14	21.333	150	87	7	286	430	302202	301831	9
Brhy	TRINITY_DN10061_c0_g1_i1|m.5314		Nuclear genome from Caulerpa lentillifera			Cale_scf_10	38.636	44	27	0	284	327	571558	571689	8.13e-05
Brhy	TRINITY_DN10061_c0_g1_i1|m.5314		Nuclear genome from Caulerpa lentillifera			Cale_scf_10	27.907	129	72	7	289	410	603447	603103	0.009
Brhy	TRINITY_DN10061_c0_g1_i1|m.5314		Nuclear genome from Caulerpa lentillifera			Cale_scf_10	34.483	29	19	0	289	317	660593	660507	1.7
Brhy	TRINITY_DN10061_c0_g1_i1|m.5314		Nuclear genome from Caulerpa lentillifera			Cale_scf_28	23.497	183	95	4	167	332	333546	333082	8.33e-05
Brhy	TRINITY_DN10061_c0_g1_i1|m.5314		Nuclear genome from Caulerpa lentillifera			Cale_scf_28	32.308	65	40	1	289	353	354458	354276	0.002
Brhy	TRINITY_DN10061_c0_g1_i1|m.5314		Nuclear genome from Caulerpa lentillifera			Cale_scf_28	34.783	46	30	0	273	318	37442	37579	0.036
Brhy	TRINITY_DN10061_c0_g1_i1|m.5314		Nuclear genome from Caulerpa lentillifera			Cale_scf_6	24.066	241	108	13	270	495	775359	774817	0.000134
Brhy	TRINITY_DN10061_c0_g1_i1|m.5314		Nuclear genome from Caulerpa lentillifera			Cale_scf_6	27.778	108	71	4	228	330	829514	829197	0.001
Brhy	TRINITY_DN10061_c0_g1_i1|m.5314		Nuclear genome from Caulerpa lentillifera			Cale_scf_6	20.598	301	129	13	247	486	189855	190610	0.011
Brhy	TRINITY_DN10061_c0_g1_i1|m.5314		Nuclear genome from Caulerpa lentillifera			Cale_scf_6	31.148	61	39	2	272	330	17745	17566	0.12
Brhy	TRINITY_DN10061_c0_g1_i1|m.5314		Nuclear genome from Caulerpa lentillifera			Cale_scf_6	32.787	61	39	2	289	347	580301	580119	0.19
Brhy	TRINITY_DN10061_c0_g1_i1|m.5314		Nuclear genome from Caulerpa lentillifera			Cale_scf_6	30.769	52	35	1	288	339	495384	495536	0.65
Brhy	TRINITY_DN10061_c0_g1_i1|m.5314		Nuclear genome from Caulerpa lentillifera			Cale_scf_1	29.524	105	55	4	228	332	243035	243292	0.000249
Brhy	TRINITY_DN10061_c0_g1_i1|m.5314		Nuclear genome from Caulerpa lentillifera			Cale_scf_1	34.483	58	34	2	284	341	864530	864369	0.011
Brhy	TRINITY_DN10061_c0_g1_i1|m.5314		Nuclear genome from Caulerpa lentillifera			Cale_scf_1	25.556	90	48	2	232	321	476317	476105	0.23
Brhy	TRINITY_DN10061_c0_g1_i1|m.5314		Nuclear genome from Caulerpa lentillifera			Cale_scf_1	37.5	32	19	1	302	333	612718	612626	0.28
Brhy	TRINITY_DN10061_c0_g1_i1|m.5314		Nuclear genome from Caulerpa lentillifera			Cale_scf_1	27.66	47	31	1	284	327	263701	263841	0.43
Brhy	TRINITY_DN10061_c0_g1_i1|m.5314		Nuclear genome from Caulerpa lentillifera			Cale_scf_1	29.87	77	49	3	286	358	1042299	1042526	0.47
Brhy	TRINITY_DN10061_c0_g1_i1|m.5314		Nuclear genome from Caulerpa lentillifera			Cale_scf_1	34.483	29	19	0	289	317	721306	721392	0.95
Brhy	TRINITY_DN10061_c0_g1_i1|m.5314		Nuclear genome from Caulerpa lentillifera			Cale_scf_1	25	52	38	1	282	333	711371	711219	0.99
Brhy	TRINITY_DN10061_c0_g1_i1|m.5314		Nuclear genome from Caulerpa lentillifera			Cale_scf_1	30.303	66	43	2	290	353	85778	85584	0.99
Brhy	TRINITY_DN10061_c0_g1_i1|m.5314		Nuclear genome from Caulerpa lentillifera			Cale_scf_11	35.385	65	39	1	283	344	441534	441340	0.000283
Brhy	TRINITY_DN10061_c0_g1_i1|m.5314		Nuclear genome from Caulerpa lentillifera			Cale_scf_11	36.765	68	38	3	286	353	380316	380128	0.000377
Brhy	TRINITY_DN10061_c0_g1_i1|m.5314		Nuclear genome from Caulerpa lentillifera			Cale_scf_11	25.143	175	90	7	160	327	82539	82961	0.004
Brhy	TRINITY_DN10061_c0_g1_i1|m.5314		Nuclear genome from Caulerpa lentillifera			Cale_scf_11	19.938	321	182	13	164	476	40472	41233	0.028
Brhy	TRINITY_DN10061_c0_g1_i1|m.5314		Nuclear genome from Caulerpa lentillifera			Cale_scf_11	20.305	197	119	8	284	476	39274	39762	0.11
Brhy	TRINITY_DN10061_c0_g1_i1|m.5314		Nuclear genome from Caulerpa lentillifera			Cale_scf_11	19.841	126	73	5	284	401	84490	84807	1.5
Brhy	TRINITY_DN10061_c0_g1_i1|m.5314		Nuclear genome from Caulerpa lentillifera			Cale_scf_11	26.531	49	35	1	279	327	159047	159190	6.2
Brhy	TRINITY_DN10061_c0_g1_i1|m.5314		Nuclear genome from Caulerpa lentillifera			Cale_scf_7	25.258	194	102	8	142	327	774363	774839	0.000404
Brhy	TRINITY_DN10061_c0_g1_i1|m.5314		Nuclear genome from Caulerpa lentillifera			Cale_scf_7	25.14	179	96	9	164	337	772932	773369	0.004
Brhy	TRINITY_DN10061_c0_g1_i1|m.5314		Nuclear genome from Caulerpa lentillifera			Cale_scf_7	18.885	323	187	12	162	476	926226	925459	0.009
Brhy	TRINITY_DN10061_c0_g1_i1|m.5314		Nuclear genome from Caulerpa lentillifera			Cale_scf_7	35.593	59	33	1	130	188	51257	51096	0.014
Brhy	TRINITY_DN10061_c0_g1_i1|m.5314		Nuclear genome from Caulerpa lentillifera			Cale_scf_7	30.526	95	43	3	275	354	656694	656954	0.11
Brhy	TRINITY_DN10061_c0_g1_i1|m.5314		Nuclear genome from Caulerpa lentillifera			Cale_scf_7	30.435	46	30	1	284	327	927500	927363	0.27
Brhy	TRINITY_DN10061_c0_g1_i1|m.5314		Nuclear genome from Caulerpa lentillifera			Cale_scf_7	18.852	122	74	4	284	400	776414	776719	0.46
Brhy	TRINITY_DN10061_c0_g1_i1|m.5314		Nuclear genome from Caulerpa lentillifera			Cale_scf_4	24.121	199	110	6	284	482	158228	158701	0.000474
Brhy	TRINITY_DN10061_c0_g1_i1|m.5314		Nuclear genome from Caulerpa lentillifera			Cale_scf_4	23.558	208	118	6	283	480	1201530	1201000	0.007
Brhy	TRINITY_DN10061_c0_g1_i1|m.5314		Nuclear genome from Caulerpa lentillifera			Cale_scf_4	36.17	47	29	1	286	332	35569	35706	0.013
Brhy	TRINITY_DN10061_c0_g1_i1|m.5314		Nuclear genome from Caulerpa lentillifera			Cale_scf_4	25.714	70	40	1	287	344	848385	848176	0.62
Brhy	TRINITY_DN10061_c0_g1_i1|m.5314		Nuclear genome from Caulerpa lentillifera			Cale_scf_4	40.625	32	19	0	283	314	963502	963407	1.3
Brhy	TRINITY_DN10061_c0_g1_i1|m.5314		Nuclear genome from Caulerpa lentillifera			Cale_scf_4	34.146	41	26	1	287	327	146519	146400	2.7
Brhy	TRINITY_DN10061_c0_g1_i1|m.5314		Nuclear genome from Caulerpa lentillifera			Cale_scf_4	55.556	27	11	1	301	327	480584	480507	3.7
Brhy	TRINITY_DN10061_c0_g1_i1|m.5314		Nuclear genome from Caulerpa lentillifera			Cale_scf_3	32.394	71	46	2	283	353	360570	360364	0.000508
Brhy	TRINITY_DN10061_c0_g1_i1|m.5314		Nuclear genome from Caulerpa lentillifera			Cale_scf_3	21.61	236	138	6	287	517	987791	987210	0.000644
Brhy	TRINITY_DN10061_c0_g1_i1|m.5314		Nuclear genome from Caulerpa lentillifera			Cale_scf_3	24.59	183	97	6	153	329	1227481	1227038	0.021
Brhy	TRINITY_DN10061_c0_g1_i1|m.5314		Nuclear genome from Caulerpa lentillifera			Cale_scf_3	19.786	187	101	6	298	481	254263	253841	0.42
Brhy	TRINITY_DN10061_c0_g1_i1|m.5314		Nuclear genome from Caulerpa lentillifera			Cale_scf_3	33.333	69	39	2	290	353	498221	498021	1.9
Brhy	TRINITY_DN10061_c0_g1_i1|m.5314		Nuclear genome from Caulerpa lentillifera			Cale_scf_3	48.148	27	13	1	301	327	17681	17758	5.4
Brhy	TRINITY_DN10061_c0_g1_i1|m.5314		Nuclear genome from Caulerpa lentillifera			Cale_scf_2	27.778	144	77	6	287	428	680539	680895	0.000521
Brhy	TRINITY_DN10061_c0_g1_i1|m.5314		Nuclear genome from Caulerpa lentillifera			Cale_scf_2	27.885	104	61	6	260	357	146153	145866	0.016
Brhy	TRINITY_DN10061_c0_g1_i1|m.5314		Nuclear genome from Caulerpa lentillifera			Cale_scf_2	50	28	14	0	281	308	459838	459921	0.22
Brhy	TRINITY_DN10061_c0_g1_i1|m.5314		Nuclear genome from Caulerpa lentillifera			Cale_scf_2	28.767	73	46	3	289	361	868875	869075	1.7
Brhy	TRINITY_DN10061_c0_g1_i1|m.5314		Nuclear genome from Caulerpa lentillifera			Cale_scf_2	22.772	101	67	3	274	363	457987	457685	2.5
Brhy	TRINITY_DN10061_c0_g1_i1|m.5314		Nuclear genome from Caulerpa lentillifera			Cale_scf_2	22.286	175	108	7	144	313	424689	424234	4.1
Brhy	TRINITY_DN10061_c0_g1_i1|m.5314		Nuclear genome from Caulerpa lentillifera			Cale_scf_8	23.923	209	138	7	141	332	901032	900418	0.001
Brhy	TRINITY_DN10061_c0_g1_i1|m.5314		Nuclear genome from Caulerpa lentillifera			Cale_scf_8	20.053	374	198	15	139	486	141385	140489	0.032
Brhy	TRINITY_DN10061_c0_g1_i1|m.5314		Nuclear genome from Caulerpa lentillifera			Cale_scf_8	20.603	199	112	8	287	477	142571	142089	0.58
Brhy	TRINITY_DN10061_c0_g1_i1|m.5314		Nuclear genome from Caulerpa lentillifera			Cale_scf_8	53.846	26	12	0	289	314	850972	851049	0.97
Brhy	TRINITY_DN10061_c0_g1_i1|m.5314		Nuclear genome from Caulerpa lentillifera			Cale_scf_13	23.438	128	68	4	287	409	603711	603403	0.004
Brhy	TRINITY_DN10061_c0_g1_i1|m.5314		Nuclear genome from Caulerpa lentillifera			Cale_scf_13	26.437	87	52	2	236	322	790836	791060	0.06
Brhy	TRINITY_DN10061_c0_g1_i1|m.5314		Nuclear genome from Caulerpa lentillifera			Cale_scf_13	46.667	30	14	1	449	476	69375	69286	0.073
Brhy	TRINITY_DN10061_c0_g1_i1|m.5314		Nuclear genome from Caulerpa lentillifera			Cale_scf_13	20.853	211	123	8	280	476	99284	99826	0.1
Brhy	TRINITY_DN10061_c0_g1_i1|m.5314		Nuclear genome from Caulerpa lentillifera			Cale_scf_13	31.579	57	29	2	298	345	755086	755253	0.92
Brhy	TRINITY_DN10061_c0_g1_i1|m.5314		Nuclear genome from Caulerpa lentillifera			Cale_scf_18	27.119	59	43	0	423	481	180472	180648	0.004
Brhy	TRINITY_DN10061_c0_g1_i1|m.5314		Nuclear genome from Caulerpa lentillifera			Cale_scf_18	26.891	119	60	5	287	400	6400	6110	0.03
Brhy	TRINITY_DN10061_c0_g1_i1|m.5314		Nuclear genome from Caulerpa lentillifera			Cale_scf_18	36.364	44	28	0	289	332	785591	785460	0.077
Brhy	TRINITY_DN10061_c0_g1_i1|m.5314		Nuclear genome from Caulerpa lentillifera			Cale_scf_18	40.909	44	21	2	289	327	101433	101564	0.13
Brhy	TRINITY_DN10061_c0_g1_i1|m.5314		Nuclear genome from Caulerpa lentillifera			Cale_scf_18	21.264	174	92	6	232	400	9960	10361	0.23
Brhy	TRINITY_DN10061_c0_g1_i1|m.5314		Nuclear genome from Caulerpa lentillifera			Cale_scf_18	43.333	30	17	0	286	315	417174	417085	2.7
Brhy	TRINITY_DN10061_c0_g1_i1|m.5314		Nuclear genome from Caulerpa lentillifera			Cale_scf_12	26.271	118	78	3	286	401	311990	311658	0.015
Brhy	TRINITY_DN10061_c0_g1_i1|m.5314		Nuclear genome from Caulerpa lentillifera			Cale_scf_12	27.869	61	43	1	271	330	723871	724053	0.035
Brhy	TRINITY_DN10061_c0_g1_i1|m.5314		Nuclear genome from Caulerpa lentillifera			Cale_scf_12	31.034	58	37	2	272	327	13783	13953	0.046
Brhy	TRINITY_DN10061_c0_g1_i1|m.5314		Nuclear genome from Caulerpa lentillifera			Cale_scf_12	33.333	72	40	3	289	352	485911	485696	0.096
Brhy	TRINITY_DN10061_c0_g1_i1|m.5314		Nuclear genome from Caulerpa lentillifera			Cale_scf_12	24	125	78	3	246	356	24014	24379	0.18
Brhy	TRINITY_DN10061_c0_g1_i1|m.5314		Nuclear genome from Caulerpa lentillifera			Cale_scf_12	38.095	42	25	1	276	316	100418	100543	0.4
Brhy	TRINITY_DN10061_c0_g1_i1|m.5314		Nuclear genome from Caulerpa lentillifera			Cale_scf_12	20.513	195	103	6	288	476	425505	425059	0.56
Brhy	TRINITY_DN10061_c0_g1_i1|m.5314		Nuclear genome from Caulerpa lentillifera			Cale_scf_12	26.923	78	52	3	280	355	449645	449421	7.4
Brhy	TRINITY_DN10061_c0_g1_i1|m.5314		Nuclear genome from Caulerpa lentillifera			Cale_scf_25	32.143	56	34	2	298	353	246651	246806	0.055
Brhy	TRINITY_DN10061_c0_g1_i1|m.5314		Nuclear genome from Caulerpa lentillifera			Cale_scf_25	28.75	80	49	3	291	362	435525	435764	2
Brhy	TRINITY_DN10061_c0_g1_i1|m.5314		Nuclear genome from Caulerpa lentillifera			Cale_scf_30	22.105	190	95	7	298	482	227109	227534	0.088
Brhy	TRINITY_DN10061_c0_g1_i1|m.5314		Nuclear genome from Caulerpa lentillifera			Cale_scf_30	39.024	41	24	1	293	333	215577	215696	2.4
Brhy	TRINITY_DN10061_c0_g1_i1|m.5314		Nuclear genome from Caulerpa lentillifera			Cale_scf_31	23.834	193	112	8	287	472	134023	134517	0.11
Brhy	TRINITY_DN10061_c0_g1_i1|m.5314		Nuclear genome from Caulerpa lentillifera			Cale_scf_31	34.615	26	17	0	288	313	132625	132548	3.9
Brhy	TRINITY_DN10061_c0_g1_i1|m.5314		Nuclear genome from Caulerpa lentillifera			Cale_scf_5	31.507	73	32	2	236	308	631148	631312	0.13
Brhy	TRINITY_DN10061_c0_g1_i1|m.5314		Nuclear genome from Caulerpa lentillifera			Cale_scf_5	34.694	49	30	1	283	329	939057	939203	0.23
Brhy	TRINITY_DN10061_c0_g1_i1|m.5314		Nuclear genome from Caulerpa lentillifera			Cale_scf_5	33.333	45	29	1	284	327	646116	646250	1.6
Brhy	TRINITY_DN10061_c0_g1_i1|m.5314		Nuclear genome from Caulerpa lentillifera			Cale_scf_5	35.484	31	20	0	284	314	1024041	1024133	2.4
Brhy	TRINITY_DN10061_c0_g1_i1|m.5314		Nuclear genome from Caulerpa lentillifera			Cale_scf_5	22.222	90	59	3	283	361	627055	626786	6.3
Brhy	TRINITY_DN10061_c0_g1_i1|m.5314		Nuclear genome from Caulerpa lentillifera			Cale_scf_21	27.273	44	31	1	284	327	368255	368383	0.64
Brhy	TRINITY_DN10061_c0_g1_i1|m.5314		Nuclear genome from Caulerpa lentillifera			Cale_scf_22	23.711	97	73	1	232	327	9996	10286	1.5
Brhy	TRINITY_DN10061_c0_g1_i1|m.5314		Nuclear genome from Caulerpa lentillifera			Cale_scf_32	37.143	35	20	1	285	317	229959	229855	9.1
Brhy	TRINITY_DN10291_c1_g2_i1|m.39405		Nuclear genome from Caulerpa lentillifera			Cale_scf_25	60.309	194	72	4	56	247	523850	524422	4.65e-106
Brhy	TRINITY_DN10291_c1_g2_i1|m.39405		Nuclear genome from Caulerpa lentillifera			Cale_scf_25	63.736	182	51	1	249	415	524464	525009	4.65e-106
Brhy	TRINITY_DN10291_c1_g2_i1|m.39405		Nuclear genome from Caulerpa lentillifera			Cale_scf_9	63.978	186	63	3	63	247	56222	55674	8.33e-105
Brhy	TRINITY_DN10291_c1_g2_i1|m.39405		Nuclear genome from Caulerpa lentillifera			Cale_scf_9	74.809	131	33	0	246	376	55641	55249	8.33e-105
Brhy	TRINITY_DN10291_c1_g2_i1|m.39405		Nuclear genome from Caulerpa lentillifera			Cale_scf_9	35	40	26	0	376	415	55204	55085	8.33e-105
Brhy	TRINITY_DN10291_c1_g2_i1|m.39405		Nuclear genome from Caulerpa lentillifera			Cale_scf_1	47.511	221	94	4	152	351	376053	375394	3.31e-48
Brhy	TRINITY_DN10291_c1_g2_i1|m.39405		Nuclear genome from Caulerpa lentillifera			Cale_scf_1	50	46	19	2	109	152	376229	376098	3.31e-48
Brhy	TRINITY_DN10291_c1_g2_i1|m.39405		Nuclear genome from Caulerpa lentillifera			Cale_scf_1	35.294	51	32	1	350	400	375346	375197	3.31e-48
Brhy	TRINITY_DN10291_c1_g2_i1|m.39405		Nuclear genome from Caulerpa lentillifera			Cale_scf_54	41.053	285	144	6	133	411	4838	5638	1.2e-40
Brhy	TRINITY_DN10291_c1_g2_i1|m.39405		Nuclear genome from Caulerpa lentillifera			Cale_scf_27	34.296	277	163	4	131	401	33586	34377	3.37e-29
Brhy	TRINITY_DN10291_c1_g2_i1|m.39405		Nuclear genome from Caulerpa lentillifera			Cale_scf_20	34.158	202	103	6	123	299	718350	717760	3.74e-18
Brhy	TRINITY_DN10291_c1_g2_i1|m.39405		Nuclear genome from Caulerpa lentillifera			Cale_scf_20	24.786	117	50	3	293	382	717740	717423	3.74e-18
Brhy	TRINITY_DN10291_c1_g2_i1|m.39405		Nuclear genome from Caulerpa lentillifera			Cale_scf_29	40.678	59	29	3	142	197	401449	401616	0.016
Brhy	TRINITY_DN10291_c1_g2_i1|m.39405		Nuclear genome from Caulerpa lentillifera			Cale_scf_12	31.707	41	28	0	323	363	498975	499097	3.1
Brhy	TRINITY_DN10291_c1_g2_i1|m.39405		Nuclear genome from Caulerpa lentillifera			Cale_scf_14	31.373	51	28	2	7	57	279623	279754	4.9
Brhy	TRINITY_DN10574_c0_g1_i1|m.43562		Nuclear genome from Caulerpa lentillifera			Cale_scf_2	69.565	253	67	4	1	244	1132409	1131654	1.95e-113
Brhy	TRINITY_DN10574_c0_g1_i1|m.43562		Nuclear genome from Caulerpa lentillifera			Cale_scf_2	42.478	226	109	6	31	236	747660	748334	1.43e-47
Brhy	TRINITY_DN10574_c0_g1_i1|m.43562		Nuclear genome from Caulerpa lentillifera			Cale_scf_5	69.478	249	67	4	4	244	188667	189410	1.69e-112
Brhy	TRINITY_DN10574_c0_g1_i1|m.43562		Nuclear genome from Caulerpa lentillifera			Cale_scf_5	40.476	252	110	8	18	236	441906	441172	4.37e-41
Brhy	TRINITY_DN10574_c0_g1_i1|m.43562		Nuclear genome from Caulerpa lentillifera			Cale_scf_15	73.684	228	55	3	21	244	510191	509511	1.44e-111
Brhy	TRINITY_DN10574_c0_g1_i1|m.43562		Nuclear genome from Caulerpa lentillifera			Cale_scf_24	73.246	228	56	3	21	244	434409	435089	1.03e-110
Brhy	TRINITY_DN10574_c0_g1_i1|m.43562		Nuclear genome from Caulerpa lentillifera			Cale_scf_17	68.254	252	55	5	14	244	26038	25295	1.64e-106
Brhy	TRINITY_DN10574_c0_g1_i1|m.43562		Nuclear genome from Caulerpa lentillifera			Cale_scf_21	74.879	207	48	2	42	244	36914	36294	4.06e-100
Brhy	TRINITY_DN10574_c0_g1_i1|m.43562		Nuclear genome from Caulerpa lentillifera			Cale_scf_21	71.429	21	5	1	22	42	37024	36965	0.095
Brhy	TRINITY_DN10574_c0_g1_i1|m.43562		Nuclear genome from Caulerpa lentillifera			Cale_scf_13	66.522	230	59	4	32	244	523450	524136	6.8e-97
Brhy	TRINITY_DN10574_c0_g1_i1|m.43562		Nuclear genome from Caulerpa lentillifera			Cale_scf_10	69.725	218	60	4	32	244	612707	613357	2.01e-96
Brhy	TRINITY_DN10574_c0_g1_i1|m.43562		Nuclear genome from Caulerpa lentillifera			Cale_scf_3	70.229	131	38	1	20	150	962780	963169	2.05e-59
Brhy	TRINITY_DN10574_c0_g1_i1|m.43562		Nuclear genome from Caulerpa lentillifera			Cale_scf_3	66.346	104	31	2	145	244	963324	963635	9.6e-39
Brhy	TRINITY_DN10574_c0_g1_i1|m.43562		Nuclear genome from Caulerpa lentillifera			Cale_scf_3	51.282	78	25	1	172	236	874663	874896	3.24e-16
Brhy	TRINITY_DN10574_c0_g1_i1|m.43562		Nuclear genome from Caulerpa lentillifera			Cale_scf_3	56.667	60	21	1	177	236	372441	372277	3.42e-15
Brhy	TRINITY_DN10574_c0_g1_i1|m.43562		Nuclear genome from Caulerpa lentillifera			Cale_scf_3	34.821	112	56	4	4	104	874085	874402	6.8e-11
Brhy	TRINITY_DN10574_c0_g1_i1|m.43562		Nuclear genome from Caulerpa lentillifera			Cale_scf_3	45.652	46	25	0	52	97	372848	372711	2.96e-05
Brhy	TRINITY_DN10574_c0_g1_i1|m.43562		Nuclear genome from Caulerpa lentillifera			Cale_scf_3	34.146	41	27	0	177	217	874277	874399	0.011
Brhy	TRINITY_DN10574_c0_g1_i1|m.43562		Nuclear genome from Caulerpa lentillifera			Cale_scf_3	38.889	54	27	1	42	95	963381	963524	0.21
Brhy	TRINITY_DN10574_c0_g1_i1|m.43562		Nuclear genome from Caulerpa lentillifera			Cale_scf_3	38.462	39	23	1	177	214	372815	372699	2.9
Brhy	TRINITY_DN10574_c0_g1_i1|m.43562		Nuclear genome from Caulerpa lentillifera			Cale_scf_26	63.946	147	52	1	4	150	222791	223228	2.51e-59
Brhy	TRINITY_DN10574_c0_g1_i1|m.43562		Nuclear genome from Caulerpa lentillifera			Cale_scf_26	68.367	98	27	2	151	244	223411	223704	2.11e-38
Brhy	TRINITY_DN10574_c0_g1_i1|m.43562		Nuclear genome from Caulerpa lentillifera			Cale_scf_26	38.889	54	27	1	42	95	223450	223593	0.21
Brhy	TRINITY_DN10574_c0_g1_i1|m.43562		Nuclear genome from Caulerpa lentillifera			Cale_scf_6	43.931	173	85	4	60	232	185563	185081	4.83e-33
Brhy	TRINITY_DN10574_c0_g1_i1|m.43562		Nuclear genome from Caulerpa lentillifera			Cale_scf_7	38.158	228	105	8	36	236	323816	324472	2.22e-29
Brhy	TRINITY_DN10574_c0_g1_i1|m.43562		Nuclear genome from Caulerpa lentillifera			Cale_scf_23	36.275	204	86	6	50	236	456717	457247	2.51e-26
Brhy	TRINITY_DN10574_c0_g1_i1|m.43562		Nuclear genome from Caulerpa lentillifera			Cale_scf_14	34.836	244	103	9	12	236	765342	764722	2.93e-26
Brhy	TRINITY_DN10574_c0_g1_i1|m.43562		Nuclear genome from Caulerpa lentillifera			Cale_scf_19	34.572	269	103	12	11	220	25420	26184	2.85e-21
Brhy	TRINITY_DN10574_c0_g1_i1|m.43562		Nuclear genome from Caulerpa lentillifera			Cale_scf_4	56.338	71	29	2	168	236	1221076	1221288	1.66e-16
Brhy	TRINITY_DN10574_c0_g1_i1|m.43562		Nuclear genome from Caulerpa lentillifera			Cale_scf_4	36.364	143	77	5	4	146	1220505	1220891	1.95e-15
Brhy	TRINITY_DN10574_c0_g1_i1|m.43562		Nuclear genome from Caulerpa lentillifera			Cale_scf_4	53.086	81	36	2	141	220	1022369	1022130	3.36e-15
Brhy	TRINITY_DN10574_c0_g1_i1|m.43562		Nuclear genome from Caulerpa lentillifera			Cale_scf_4	28.105	153	53	7	1	100	1022980	1022534	0.021
Brhy	TRINITY_DN10574_c0_g1_i1|m.43562		Nuclear genome from Caulerpa lentillifera			Cale_scf_4	34.921	63	40	1	159	220	1220592	1220780	0.082
Brhy	TRINITY_DN10574_c0_g1_i1|m.43562		Nuclear genome from Caulerpa lentillifera			Cale_scf_4	40	40	22	2	57	95	1022279	1022163	5.3
Brhy	TRINITY_DN10574_c0_g1_i1|m.43562		Nuclear genome from Caulerpa lentillifera			Cale_scf_34	58.209	67	26	2	172	236	207376	207576	1.75e-16
Brhy	TRINITY_DN10574_c0_g1_i1|m.43562		Nuclear genome from Caulerpa lentillifera			Cale_scf_34	36.364	143	77	5	4	146	206793	207179	1.31e-15
Brhy	TRINITY_DN10574_c0_g1_i1|m.43562		Nuclear genome from Caulerpa lentillifera			Cale_scf_34	34.921	63	40	1	159	220	206880	207068	0.082
Brhy	TRINITY_DN10574_c0_g1_i1|m.43562		Nuclear genome from Caulerpa lentillifera			Cale_scf_11	24.49	98	59	3	158	240	495685	495978	3
Brhy	TRINITY_DN10574_c0_g1_i1|m.43562		Nuclear genome from Caulerpa lentillifera			Cale_scf_44	52.174	23	11	0	72	94	33233	33165	5.7
Brhy	TRINITY_DN10651_c0_g1_i1|m.35752		Nuclear genome from Caulerpa lentillifera			Cale_scf_7	72.609	230	63	0	101	330	323816	324505	1.07e-104
Brhy	TRINITY_DN10651_c0_g1_i1|m.35752		Nuclear genome from Caulerpa lentillifera			Cale_scf_34	49.425	87	43	1	242	327	207340	207600	1.03e-27
Brhy	TRINITY_DN10651_c0_g1_i1|m.35752		Nuclear genome from Caulerpa lentillifera			Cale_scf_34	43.59	78	35	3	116	193	206901	207107	1.03e-27
Brhy	TRINITY_DN10651_c0_g1_i1|m.35752		Nuclear genome from Caulerpa lentillifera			Cale_scf_34	39.024	41	25	0	209	249	207191	207313	1.03e-27
Brhy	TRINITY_DN10651_c0_g1_i1|m.35752		Nuclear genome from Caulerpa lentillifera			Cale_scf_4	47.126	87	45	1	242	327	1221052	1221312	1.03e-27
Brhy	TRINITY_DN10651_c0_g1_i1|m.35752		Nuclear genome from Caulerpa lentillifera			Cale_scf_4	42.308	78	36	3	116	193	1220613	1220819	1.03e-27
Brhy	TRINITY_DN10651_c0_g1_i1|m.35752		Nuclear genome from Caulerpa lentillifera			Cale_scf_4	40.476	42	25	0	208	249	1220900	1221025	1.03e-27
Brhy	TRINITY_DN10651_c0_g1_i1|m.35752		Nuclear genome from Caulerpa lentillifera			Cale_scf_4	28.283	99	33	2	116	176	1022815	1022519	0.0003
Brhy	TRINITY_DN10651_c0_g1_i1|m.35752		Nuclear genome from Caulerpa lentillifera			Cale_scf_4	42.105	57	31	2	253	308	1022282	1022115	0.84
Brhy	TRINITY_DN10651_c0_g1_i1|m.35752		Nuclear genome from Caulerpa lentillifera			Cale_scf_3	41.52	171	74	6	173	327	874438	874920	1.42e-27
Brhy	TRINITY_DN10651_c0_g1_i1|m.35752		Nuclear genome from Caulerpa lentillifera			Cale_scf_3	39.623	53	26	1	122	174	874259	874399	1.42e-27
Brhy	TRINITY_DN10651_c0_g1_i1|m.35752		Nuclear genome from Caulerpa lentillifera			Cale_scf_3	59.184	49	20	0	275	323	372411	372265	5.62e-14
Brhy	TRINITY_DN10651_c0_g1_i1|m.35752		Nuclear genome from Caulerpa lentillifera			Cale_scf_3	26.761	142	72	7	104	234	372869	372507	5.62e-14
Brhy	TRINITY_DN10651_c0_g1_i1|m.35752		Nuclear genome from Caulerpa lentillifera			Cale_scf_3	51.389	72	34	1	251	322	963402	963614	1.4e-09
Brhy	TRINITY_DN10651_c0_g1_i1|m.35752		Nuclear genome from Caulerpa lentillifera			Cale_scf_3	38.824	85	41	4	109	191	962849	963076	1.89e-07
Brhy	TRINITY_DN10651_c0_g1_i1|m.35752		Nuclear genome from Caulerpa lentillifera			Cale_scf_2	39.535	215	113	6	116	322	747726	748343	1.91e-27
Brhy	TRINITY_DN10651_c0_g1_i1|m.35752		Nuclear genome from Caulerpa lentillifera			Cale_scf_2	39.252	214	98	8	117	322	1132244	1131675	1.34e-23
Brhy	TRINITY_DN10651_c0_g1_i1|m.35752		Nuclear genome from Caulerpa lentillifera			Cale_scf_5	40	215	110	7	117	322	441777	441163	4.8e-25
Brhy	TRINITY_DN10651_c0_g1_i1|m.35752		Nuclear genome from Caulerpa lentillifera			Cale_scf_5	39.252	214	98	8	117	322	188820	189389	7.04e-24
Brhy	TRINITY_DN10651_c0_g1_i1|m.35752		Nuclear genome from Caulerpa lentillifera			Cale_scf_15	39.252	214	98	8	117	322	510101	509532	9.49e-24
Brhy	TRINITY_DN10651_c0_g1_i1|m.35752		Nuclear genome from Caulerpa lentillifera			Cale_scf_24	39.252	214	98	8	117	322	434499	435068	1.63e-23
Brhy	TRINITY_DN10651_c0_g1_i1|m.35752		Nuclear genome from Caulerpa lentillifera			Cale_scf_17	37.156	218	113	7	109	322	25909	25316	3.32e-23
Brhy	TRINITY_DN10651_c0_g1_i1|m.35752		Nuclear genome from Caulerpa lentillifera			Cale_scf_21	37.156	218	113	7	109	322	36908	36315	5.14e-23
Brhy	TRINITY_DN10651_c0_g1_i1|m.35752		Nuclear genome from Caulerpa lentillifera			Cale_scf_10	36.697	218	101	8	116	322	612761	613336	1.71e-22
Brhy	TRINITY_DN10651_c0_g1_i1|m.35752		Nuclear genome from Caulerpa lentillifera			Cale_scf_23	35.345	232	100	10	103	323	456681	457259	9.6e-21
Brhy	TRINITY_DN10651_c0_g1_i1|m.35752		Nuclear genome from Caulerpa lentillifera			Cale_scf_14	38.208	212	94	10	117	323	765249	764710	1.41e-20
Brhy	TRINITY_DN10651_c0_g1_i1|m.35752		Nuclear genome from Caulerpa lentillifera			Cale_scf_6	36.449	214	84	8	125	327	185563	185045	2.36e-20
Brhy	TRINITY_DN10651_c0_g1_i1|m.35752		Nuclear genome from Caulerpa lentillifera			Cale_scf_13	33.929	224	107	7	116	319	523504	524112	1.28e-19
Brhy	TRINITY_DN10651_c0_g1_i1|m.35752		Nuclear genome from Caulerpa lentillifera			Cale_scf_26	51.389	72	34	1	251	322	223471	223683	1.4e-09
Brhy	TRINITY_DN10651_c0_g1_i1|m.35752		Nuclear genome from Caulerpa lentillifera			Cale_scf_26	36.559	93	48	4	101	191	222884	223135	5.62e-07
Brhy	TRINITY_DN10651_c0_g1_i1|m.35752		Nuclear genome from Caulerpa lentillifera			Cale_scf_19	29.412	255	86	13	116	308	25531	26199	1.1e-06
Brhy	TRINITY_DN10651_c0_g1_i1|m.35752		Nuclear genome from Caulerpa lentillifera			Cale_scf_54	26.016	123	87	2	115	233	1689	1321	4.3
Brhy	TRINITY_DN10923_c0_g1_i1|m.44456		Nuclear genome from Caulerpa lentillifera			Cale_scf_20	54.301	186	51	3	33	184	510873	511430	6.04e-60
Brhy	TRINITY_DN10923_c0_g1_i1|m.44456		Nuclear genome from Caulerpa lentillifera			Cale_scf_72	68.519	108	34	0	53	160	5373	5696	1.23e-48
Brhy	TRINITY_DN10923_c0_g1_i1|m.44456		Nuclear genome from Caulerpa lentillifera			Cale_scf_72	61.905	21	8	0	33	53	5266	5328	0.057
Brhy	TRINITY_DN10923_c0_g1_i1|m.44456		Nuclear genome from Caulerpa lentillifera			Cale_scf_72	60	25	9	1	159	182	5744	5818	0.087
Brhy	TRINITY_DN10923_c0_g1_i1|m.44456		Nuclear genome from Caulerpa lentillifera			Cale_scf_22	28.571	56	40	0	32	87	294752	294919	0.17
Brhy	TRINITY_DN10923_c0_g1_i1|m.44456		Nuclear genome from Caulerpa lentillifera			Cale_scf_5	42.308	26	15	0	118	143	229269	229192	5.6
Brhy	TRINITY_DN11001_c0_g1_i1|m.16529		Nuclear genome from Caulerpa lentillifera			Cale_scf_4	51.799	139	47	2	155	273	885926	885510	6.17e-55
Brhy	TRINITY_DN11001_c0_g1_i1|m.16529		Nuclear genome from Caulerpa lentillifera			Cale_scf_4	62.5	72	27	0	85	156	886180	885965	6.17e-55
Brhy	TRINITY_DN11001_c0_g1_i1|m.16529		Nuclear genome from Caulerpa lentillifera			Cale_scf_4	67.273	55	18	0	237	291	885636	885472	9.98e-09
Brhy	TRINITY_DN11416_c0_g1_i1|m.26546		Nuclear genome from Caulerpa lentillifera			Cale_scf_20	93.333	30	2	0	129	158	424097	424008	2.68e-23
Brhy	TRINITY_DN11416_c0_g1_i1|m.26546		Nuclear genome from Caulerpa lentillifera			Cale_scf_20	75.758	33	8	0	99	131	424233	424135	2.68e-23
Brhy	TRINITY_DN11416_c0_g1_i1|m.26546		Nuclear genome from Caulerpa lentillifera			Cale_scf_16	89.655	29	3	0	130	158	451610	451696	1.8e-20
Brhy	TRINITY_DN11416_c0_g1_i1|m.26546		Nuclear genome from Caulerpa lentillifera			Cale_scf_16	76.667	30	7	0	103	132	451480	451569	1.8e-20
Brhy	TRINITY_DN11416_c0_g1_i1|m.26546		Nuclear genome from Caulerpa lentillifera			Cale_scf_10	35.556	45	27	1	2	46	543828	543956	9.1
Brhy	TRINITY_DN11493_c0_g1_i1|m.26677		Nuclear genome from Caulerpa lentillifera			Cale_scf_16	65.217	138	17	2	8	114	451610	452023	1.27e-50
Brhy	TRINITY_DN11493_c0_g1_i1|m.26677		Nuclear genome from Caulerpa lentillifera			Cale_scf_20	80.645	62	12	0	37	98	423954	423769	5.88e-38
Brhy	TRINITY_DN11493_c0_g1_i1|m.26677		Nuclear genome from Caulerpa lentillifera			Cale_scf_20	93.548	31	2	0	7	37	424097	424005	5.88e-38
Brhy	TRINITY_DN11493_c0_g1_i1|m.26677		Nuclear genome from Caulerpa lentillifera			Cale_scf_20	41.818	55	13	1	89	124	423748	423584	0.000381
Brhy	TRINITY_DN11493_c0_g1_i1|m.26677		Nuclear genome from Caulerpa lentillifera			Cale_scf_8	34	50	32	1	33	82	989323	989177	0.3
Brhy	TRINITY_DN11493_c0_g1_i1|m.26677		Nuclear genome from Caulerpa lentillifera			Cale_scf_30	42.857	21	12	0	65	85	150638	150576	6.9
Brhy	TRINITY_DN11783_c0_g1_i1|m.53042		Nuclear genome from Caulerpa lentillifera			Cale_scf_10	42.105	95	55	0	34	128	881244	880960	7.66e-33
Brhy	TRINITY_DN11783_c0_g1_i1|m.53042		Nuclear genome from Caulerpa lentillifera			Cale_scf_10	69.767	43	8	1	128	165	880900	880772	7.66e-33
Brhy	TRINITY_DN11783_c0_g1_i1|m.53042		Nuclear genome from Caulerpa lentillifera			Cale_scf_10	28.378	74	48	1	34	107	459066	459272	1
Brhy	TRINITY_DN11783_c0_g1_i1|m.53042		Nuclear genome from Caulerpa lentillifera			Cale_scf_17	38.235	34	21	0	77	110	315385	315486	5.3
Brhy	TRINITY_DN11783_c0_g1_i1|m.53042		Nuclear genome from Caulerpa lentillifera			Cale_scf_11	52.381	21	10	0	49	69	743794	743732	8.2
Brhy	TRINITY_DN11864_c0_g1_i1|m.30228		Nuclear genome from Caulerpa lentillifera			Cale_scf_18	56.25	48	21	0	59	106	690527	690384	3.54e-08
Brhy	TRINITY_DN11864_c0_g1_i1|m.30228		Nuclear genome from Caulerpa lentillifera			Cale_scf_28	60.417	48	19	0	59	106	248490	248633	0.000169
Brhy	TRINITY_DN11864_c0_g1_i1|m.30228		Nuclear genome from Caulerpa lentillifera			Cale_scf_16	34.146	41	27	0	66	106	125953	125831	2.3
Brhy	TRINITY_DN12147_c0_g1_i1|m.22685		Nuclear genome from Caulerpa lentillifera			Cale_scf_6	37.143	35	22	0	67	101	567885	567781	0.39
Brhy	TRINITY_DN12147_c0_g1_i1|m.22686		Nuclear genome from Caulerpa lentillifera			Cale_scf_6	48.077	52	27	0	83	134	567423	567268	3.57e-16
Brhy	TRINITY_DN12147_c0_g1_i1|m.22686		Nuclear genome from Caulerpa lentillifera			Cale_scf_6	43.902	41	20	1	47	84	567595	567473	3.57e-16
Brhy	TRINITY_DN12147_c0_g1_i1|m.22686		Nuclear genome from Caulerpa lentillifera			Cale_scf_6	42.857	35	18	1	19	53	567716	567618	3.57e-16
Brhy	TRINITY_DN12147_c0_g1_i1|m.22686		Nuclear genome from Caulerpa lentillifera			Cale_scf_34	37.5	32	13	1	53	77	51528	51623	1.7
Brhy	TRINITY_DN12147_c0_g1_i1|m.22686		Nuclear genome from Caulerpa lentillifera			Cale_scf_14	26.761	71	47	2	5	70	638672	638884	5.1
Brhy	TRINITY_DN12147_c0_g1_i2|m.22687		Nuclear genome from Caulerpa lentillifera			Cale_scf_6	47.059	34	18	0	141	174	567574	567473	2.77e-12
Brhy	TRINITY_DN12147_c0_g1_i2|m.22687		Nuclear genome from Caulerpa lentillifera			Cale_scf_6	42.857	35	18	1	109	143	567716	567618	2.77e-12
Brhy	TRINITY_DN12147_c0_g1_i2|m.22687		Nuclear genome from Caulerpa lentillifera			Cale_scf_6	37.143	35	22	0	67	101	567885	567781	2.77e-12
Brhy	TRINITY_DN12147_c0_g1_i2|m.22687		Nuclear genome from Caulerpa lentillifera			Cale_scf_34	30.612	49	21	2	126	167	51495	51623	3.4
Brhy	TRINITY_DN12147_c0_g1_i3|m.22688		Nuclear genome from Caulerpa lentillifera			Cale_scf_6	37.143	35	22	0	67	101	567885	567781	0.39
Brhy	TRINITY_DN12147_c0_g1_i4|m.22689		Nuclear genome from Caulerpa lentillifera			Cale_scf_6	37.719	114	56	1	173	271	567423	567082	6.5e-23
Brhy	TRINITY_DN12147_c0_g1_i4|m.22689		Nuclear genome from Caulerpa lentillifera			Cale_scf_6	47.059	34	18	0	141	174	567574	567473	6.5e-23
Brhy	TRINITY_DN12147_c0_g1_i4|m.22689		Nuclear genome from Caulerpa lentillifera			Cale_scf_6	42.857	35	18	1	109	143	567716	567618	6.5e-23
Brhy	TRINITY_DN12147_c0_g1_i4|m.22689		Nuclear genome from Caulerpa lentillifera			Cale_scf_6	37.143	35	22	0	67	101	567885	567781	6.5e-23
Brhy	TRINITY_DN12147_c0_g1_i4|m.22689		Nuclear genome from Caulerpa lentillifera			Cale_scf_14	24.528	106	64	5	137	237	417965	417681	4.5
Brhy	TRINITY_DN12147_c0_g1_i4|m.22689		Nuclear genome from Caulerpa lentillifera			Cale_scf_34	30.612	49	21	2	126	167	51495	51623	5.5
Brhy	TRINITY_DN12147_c0_g1_i5|m.22690		Nuclear genome from Caulerpa lentillifera			Cale_scf_6	48.077	52	27	0	173	224	567423	567268	3.83e-19
Brhy	TRINITY_DN12147_c0_g1_i5|m.22690		Nuclear genome from Caulerpa lentillifera			Cale_scf_6	43.902	41	20	1	137	174	567595	567473	3.83e-19
Brhy	TRINITY_DN12147_c0_g1_i5|m.22690		Nuclear genome from Caulerpa lentillifera			Cale_scf_6	42.857	35	18	1	109	143	567716	567618	3.83e-19
Brhy	TRINITY_DN12147_c0_g1_i5|m.22690		Nuclear genome from Caulerpa lentillifera			Cale_scf_6	37.143	35	22	0	67	101	567885	567781	3.83e-19
Brhy	TRINITY_DN12147_c0_g1_i5|m.22690		Nuclear genome from Caulerpa lentillifera			Cale_scf_34	30.612	49	21	2	126	167	51495	51623	5.3
Brhy	TRINITY_DN12147_c0_g1_i6|m.22692		Nuclear genome from Caulerpa lentillifera			Cale_scf_6	37.719	114	56	1	83	181	567423	567082	8.23e-20
Brhy	TRINITY_DN12147_c0_g1_i6|m.22692		Nuclear genome from Caulerpa lentillifera			Cale_scf_6	47.059	34	18	0	51	84	567574	567473	8.23e-20
Brhy	TRINITY_DN12147_c0_g1_i6|m.22692		Nuclear genome from Caulerpa lentillifera			Cale_scf_6	42.857	35	18	1	19	53	567716	567618	8.23e-20
Brhy	TRINITY_DN12147_c0_g1_i6|m.22692		Nuclear genome from Caulerpa lentillifera			Cale_scf_34	37.5	32	13	1	53	77	51528	51623	1.9
Brhy	TRINITY_DN12147_c0_g1_i6|m.22692		Nuclear genome from Caulerpa lentillifera			Cale_scf_14	24.528	106	64	5	47	147	417965	417681	3.7
Brhy	TRINITY_DN12147_c0_g1_i6|m.22692		Nuclear genome from Caulerpa lentillifera			Cale_scf_14	27.778	72	45	3	5	70	638672	638884	4.7
Brhy	TRINITY_DN12147_c0_g1_i6|m.22692		Nuclear genome from Caulerpa lentillifera			Cale_scf_1	29.091	55	38	1	3	56	1210045	1210209	6.4
Brhy	TRINITY_DN12147_c0_g1_i6|m.22691		Nuclear genome from Caulerpa lentillifera			Cale_scf_6	37.143	35	22	0	67	101	567885	567781	0.39
Brhy	TRINITY_DN12378_c0_g1_i1|m.15485		Nuclear genome from Caulerpa lentillifera			Cale_scf_135	68.438	320	101	0	116	435	961	2	2.37e-157
Brhy	TRINITY_DN12378_c0_g1_i1|m.15485		Nuclear genome from Caulerpa lentillifera			Cale_scf_20	55.639	532	157	12	190	654	11452	9893	7.68e-151
Brhy	TRINITY_DN12378_c0_g1_i1|m.15485		Nuclear genome from Caulerpa lentillifera			Cale_scf_20	26.566	399	239	14	205	564	9020	7869	6.24e-19
Brhy	TRINITY_DN12378_c0_g1_i1|m.15485		Nuclear genome from Caulerpa lentillifera			Cale_scf_20	42.105	38	22	0	654	691	9830	9717	0.02
Brhy	TRINITY_DN12378_c0_g1_i1|m.15485		Nuclear genome from Caulerpa lentillifera			Cale_scf_20	30.469	128	70	7	169	292	11492	11154	0.11
Brhy	TRINITY_DN12378_c0_g1_i1|m.15485		Nuclear genome from Caulerpa lentillifera			Cale_scf_20	27.381	84	53	3	426	509	469839	470066	4.3
Brhy	TRINITY_DN12378_c0_g1_i1|m.15485		Nuclear genome from Caulerpa lentillifera			Cale_scf_3	39.469	527	287	9	95	599	493152	494702	1.9e-114
Brhy	TRINITY_DN12378_c0_g1_i1|m.15485		Nuclear genome from Caulerpa lentillifera			Cale_scf_3	39.744	390	215	4	245	616	290451	291614	6.1e-89
Brhy	TRINITY_DN12378_c0_g1_i1|m.15485		Nuclear genome from Caulerpa lentillifera			Cale_scf_3	49.057	53	27	0	191	243	290240	290398	6.1e-89
Brhy	TRINITY_DN12378_c0_g1_i1|m.15485		Nuclear genome from Caulerpa lentillifera			Cale_scf_3	24.706	85	59	2	376	455	987890	987636	3.7
Brhy	TRINITY_DN12378_c0_g1_i1|m.15485		Nuclear genome from Caulerpa lentillifera			Cale_scf_33	38.274	452	267	8	152	600	45064	46392	1.94e-92
Brhy	TRINITY_DN12378_c0_g1_i1|m.15485		Nuclear genome from Caulerpa lentillifera			Cale_scf_33	38.111	307	181	5	242	546	5310	4411	2.28e-58
Brhy	TRINITY_DN12378_c0_g1_i1|m.15485		Nuclear genome from Caulerpa lentillifera			Cale_scf_33	33.333	39	26	0	484	522	123995	123879	0.23
Brhy	TRINITY_DN12378_c0_g1_i1|m.15485		Nuclear genome from Caulerpa lentillifera			Cale_scf_1	31.47	483	292	10	153	604	607773	606349	1.47e-66
Brhy	TRINITY_DN12378_c0_g1_i1|m.15485		Nuclear genome from Caulerpa lentillifera			Cale_scf_1	36.013	311	192	4	185	490	1001223	1000297	2.22e-48
Brhy	TRINITY_DN12378_c0_g1_i1|m.15485		Nuclear genome from Caulerpa lentillifera			Cale_scf_4	28.269	283	171	7	354	613	426086	426907	1.8e-51
Brhy	TRINITY_DN12378_c0_g1_i1|m.15485		Nuclear genome from Caulerpa lentillifera			Cale_scf_4	36.612	183	96	2	190	354	425494	426036	1.8e-51
Brhy	TRINITY_DN12378_c0_g1_i1|m.15485		Nuclear genome from Caulerpa lentillifera			Cale_scf_42	30.729	384	262	3	198	578	5007	3859	8.16e-50
Brhy	TRINITY_DN12378_c0_g1_i1|m.15485		Nuclear genome from Caulerpa lentillifera			Cale_scf_16	31.551	187	121	3	194	375	748443	747889	1.03e-24
Brhy	TRINITY_DN12378_c0_g1_i1|m.15485		Nuclear genome from Caulerpa lentillifera			Cale_scf_16	29.114	79	54	1	375	451	747848	747612	1.03e-24
Brhy	TRINITY_DN12378_c0_g1_i1|m.15485		Nuclear genome from Caulerpa lentillifera			Cale_scf_16	27.604	192	124	4	280	461	268531	267971	7.25e-09
Brhy	TRINITY_DN12378_c0_g1_i1|m.15485		Nuclear genome from Caulerpa lentillifera			Cale_scf_16	23.288	73	56	0	427	499	747637	747419	0.19
Brhy	TRINITY_DN12378_c0_g1_i1|m.15485		Nuclear genome from Caulerpa lentillifera			Cale_scf_29	27.451	357	225	8	131	480	257681	256692	3.08e-24
Brhy	TRINITY_DN12378_c0_g1_i1|m.15485		Nuclear genome from Caulerpa lentillifera			Cale_scf_15	29.893	281	183	4	192	459	644775	643936	1.39e-23
Brhy	TRINITY_DN12378_c0_g1_i1|m.15485		Nuclear genome from Caulerpa lentillifera			Cale_scf_15	28.571	161	110	3	188	348	414119	413652	5.05e-19
Brhy	TRINITY_DN12378_c0_g1_i1|m.15485		Nuclear genome from Caulerpa lentillifera			Cale_scf_15	33.803	71	46	1	363	432	413566	413354	5.05e-19
Brhy	TRINITY_DN12378_c0_g1_i1|m.15485		Nuclear genome from Caulerpa lentillifera			Cale_scf_15	45	40	22	0	282	321	573582	573463	0.016
Brhy	TRINITY_DN12378_c0_g1_i1|m.15485		Nuclear genome from Caulerpa lentillifera			Cale_scf_2	34.821	112	64	1	188	290	264194	263859	5.81e-21
Brhy	TRINITY_DN12378_c0_g1_i1|m.15485		Nuclear genome from Caulerpa lentillifera			Cale_scf_2	25.688	109	65	2	337	429	263627	263301	5.81e-21
Brhy	TRINITY_DN12378_c0_g1_i1|m.15485		Nuclear genome from Caulerpa lentillifera			Cale_scf_2	26.923	52	37	1	289	340	263817	263665	5.81e-21
Brhy	TRINITY_DN12378_c0_g1_i1|m.15485		Nuclear genome from Caulerpa lentillifera			Cale_scf_14	30.263	76	52	1	362	436	110030	109803	5.36e-07
Brhy	TRINITY_DN12378_c0_g1_i1|m.15485		Nuclear genome from Caulerpa lentillifera			Cale_scf_14	40.984	61	35	1	249	309	110467	110288	0.000123
Brhy	TRINITY_DN12378_c0_g1_i1|m.15485		Nuclear genome from Caulerpa lentillifera			Cale_scf_10	29.193	161	105	5	148	303	790551	790081	1.18e-06
Brhy	TRINITY_DN12378_c0_g1_i1|m.15485		Nuclear genome from Caulerpa lentillifera			Cale_scf_13	32.895	76	44	3	376	445	603810	603586	0.11
Brhy	TRINITY_DN12378_c0_g1_i1|m.15485		Nuclear genome from Caulerpa lentillifera			Cale_scf_26	30.864	81	37	4	376	444	215614	215835	0.63
Brhy	TRINITY_DN12378_c0_g1_i1|m.15485		Nuclear genome from Caulerpa lentillifera			Cale_scf_6	29.167	96	61	4	354	443	495216	495500	1
Brhy	TRINITY_DN12378_c0_g1_i1|m.15485		Nuclear genome from Caulerpa lentillifera			Cale_scf_9	38.095	42	26	0	407	448	745516	745391	1.1
Brhy	TRINITY_DN12378_c0_g1_i1|m.15485		Nuclear genome from Caulerpa lentillifera			Cale_scf_9	33.929	56	35	1	396	449	830420	830253	3.1
Brhy	TRINITY_DN12378_c0_g1_i1|m.15485		Nuclear genome from Caulerpa lentillifera			Cale_scf_17	28.319	113	70	4	30	133	560028	560360	4.3
Brhy	TRINITY_DN12378_c0_g1_i1|m.15485		Nuclear genome from Caulerpa lentillifera			Cale_scf_17	41.176	34	20	0	256	289	129302	129403	5.1
Brhy	TRINITY_DN12378_c0_g1_i1|m.15485		Nuclear genome from Caulerpa lentillifera			Cale_scf_105	42.857	28	16	0	407	434	483	400	6.6
Brhy	TRINITY_DN12378_c0_g1_i1|m.15485		Nuclear genome from Caulerpa lentillifera			Cale_scf_32	26.761	71	49	2	407	475	169533	169742	6.8
Brhy	TRINITY_DN12378_c0_g1_i1|m.15485		Nuclear genome from Caulerpa lentillifera			Cale_scf_12	24.242	99	62	4	354	443	425673	425389	7.4
Brhy	TRINITY_DN12378_c0_g1_i1|m.15485		Nuclear genome from Caulerpa lentillifera			Cale_scf_27	27.66	47	31	1	403	446	422393	422533	8
Brhy	TRINITY_DN12481_c0_g2_i1|m.11453		Nuclear genome from Caulerpa lentillifera			Cale_scf_26	60.345	174	69	0	112	285	331019	331540	4.88e-73
Brhy	TRINITY_DN12481_c0_g2_i1|m.11453		Nuclear genome from Caulerpa lentillifera			Cale_scf_2	26.374	91	53	2	82	158	424979	425251	0.003
Brhy	TRINITY_DN12481_c0_g2_i1|m.11453		Nuclear genome from Caulerpa lentillifera			Cale_scf_12	35.526	76	40	4	210	281	747964	748176	1.5
Brhy	TRINITY_DN12481_c0_g2_i1|m.11453		Nuclear genome from Caulerpa lentillifera			Cale_scf_34	35.897	39	25	0	241	279	54477	54361	2
Brhy	TRINITY_DN12481_c0_g2_i1|m.11453		Nuclear genome from Caulerpa lentillifera			Cale_scf_13	22.4	125	86	4	167	280	862518	862892	8.6
Brhy	TRINITY_DN13362_c0_g1_i1|m.31548		Nuclear genome from Caulerpa lentillifera			Cale_scf_18	50.588	85	42	0	195	279	161784	161530	1.99e-38
Brhy	TRINITY_DN13362_c0_g1_i1|m.31548		Nuclear genome from Caulerpa lentillifera			Cale_scf_18	47.191	89	34	1	127	202	162070	161804	1.99e-38
Brhy	TRINITY_DN13362_c0_g1_i1|m.31548		Nuclear genome from Caulerpa lentillifera			Cale_scf_1	25.424	118	79	2	167	275	395160	394807	4.06e-06
Brhy	TRINITY_DN13362_c0_g1_i1|m.31548		Nuclear genome from Caulerpa lentillifera			Cale_scf_19	26.957	115	78	2	147	259	605222	605554	4.36e-06
Brhy	TRINITY_DN13362_c0_g1_i1|m.31548		Nuclear genome from Caulerpa lentillifera			Cale_scf_19	28.571	56	40	0	199	254	605678	605845	0.000837
Brhy	TRINITY_DN13362_c0_g1_i1|m.31548		Nuclear genome from Caulerpa lentillifera			Cale_scf_19	19.608	153	93	3	133	260	605597	606040	0.61
Brhy	TRINITY_DN13362_c0_g1_i1|m.31548		Nuclear genome from Caulerpa lentillifera			Cale_scf_19	35.135	37	17	1	40	76	39567	39656	5
Brhy	TRINITY_DN13362_c0_g1_i1|m.31548		Nuclear genome from Caulerpa lentillifera			Cale_scf_6	38.636	44	27	0	211	254	362206	362075	7.34e-05
Brhy	TRINITY_DN13362_c0_g1_i1|m.31548		Nuclear genome from Caulerpa lentillifera			Cale_scf_6	33.333	54	33	1	199	249	361570	361409	0.000452
Brhy	TRINITY_DN13362_c0_g1_i1|m.31548		Nuclear genome from Caulerpa lentillifera			Cale_scf_6	43.333	30	17	0	193	222	116639	116728	0.21
Brhy	TRINITY_DN13362_c0_g1_i1|m.31548		Nuclear genome from Caulerpa lentillifera			Cale_scf_4	32.692	52	35	0	199	250	318741	318896	0.000274
Brhy	TRINITY_DN13362_c0_g1_i1|m.31548		Nuclear genome from Caulerpa lentillifera			Cale_scf_4	32.787	61	39	1	196	254	318318	318500	0.006
Brhy	TRINITY_DN13362_c0_g1_i1|m.31548		Nuclear genome from Caulerpa lentillifera			Cale_scf_4	19.595	148	90	3	138	260	318672	319103	0.12
Brhy	TRINITY_DN13362_c0_g1_i1|m.31548		Nuclear genome from Caulerpa lentillifera			Cale_scf_4	34.146	41	27	0	219	259	318285	318407	1.2
Brhy	TRINITY_DN13362_c0_g1_i1|m.31548		Nuclear genome from Caulerpa lentillifera			Cale_scf_4	42.105	38	21	1	39	76	38739	38849	4.4
Brhy	TRINITY_DN13362_c0_g1_i1|m.31548		Nuclear genome from Caulerpa lentillifera			Cale_scf_4	23.729	59	45	0	196	254	78091	77915	10
Brhy	TRINITY_DN13362_c0_g1_i1|m.31548		Nuclear genome from Caulerpa lentillifera			Cale_scf_15	28.889	90	53	1	170	259	316994	317230	0.000845
Brhy	TRINITY_DN13362_c0_g1_i1|m.31548		Nuclear genome from Caulerpa lentillifera			Cale_scf_15	22.68	97	75	0	167	263	740531	740241	0.68
Brhy	TRINITY_DN13362_c0_g1_i1|m.31548		Nuclear genome from Caulerpa lentillifera			Cale_scf_25	26.984	63	46	0	198	260	520510	520322	0.008
Brhy	TRINITY_DN13362_c0_g1_i1|m.31548		Nuclear genome from Caulerpa lentillifera			Cale_scf_25	21.667	60	47	0	204	263	499145	498966	2.1
Brhy	TRINITY_DN13362_c0_g1_i1|m.31548		Nuclear genome from Caulerpa lentillifera			Cale_scf_25	36	50	29	2	41	88	205959	205813	3
Brhy	TRINITY_DN13362_c0_g1_i1|m.31548		Nuclear genome from Caulerpa lentillifera			Cale_scf_12	39.394	33	20	0	227	259	750599	750501	5.4
Brhy	TRINITY_DN13362_c0_g1_i1|m.31548		Nuclear genome from Caulerpa lentillifera			Cale_scf_22	35.556	45	29	0	156	200	373768	373634	9.6
Brhy	TRINITY_DN13502_c0_g2_i1|m.39188		Nuclear genome from Caulerpa lentillifera			Cale_scf_26	54.795	73	33	0	26	98	400201	400419	1.32e-22
Brhy	TRINITY_DN13502_c0_g2_i1|m.39188		Nuclear genome from Caulerpa lentillifera			Cale_scf_26	43.478	23	13	0	1	23	400080	400148	1.3
Brhy	TRINITY_DN13502_c0_g2_i1|m.39188		Nuclear genome from Caulerpa lentillifera			Cale_scf_13	44.118	34	16	1	3	36	797995	797903	0.66
Brhy	TRINITY_DN13502_c0_g2_i1|m.39188		Nuclear genome from Caulerpa lentillifera			Cale_scf_13	35.714	28	18	0	37	64	311312	311395	3
Brhy	TRINITY_DN13502_c0_g2_i1|m.39188		Nuclear genome from Caulerpa lentillifera			Cale_scf_36	30	40	28	0	49	88	45684	45565	4
Brhy	TRINITY_DN13502_c0_g2_i1|m.39188		Nuclear genome from Caulerpa lentillifera			Cale_scf_5	40	25	15	0	23	47	211128	211054	4.9
Brhy	TRINITY_DN13502_c0_g2_i1|m.39188		Nuclear genome from Caulerpa lentillifera			Cale_scf_55	27.66	47	33	1	17	63	6205	6342	6.6
Brhy	TRINITY_DN13502_c0_g2_i1|m.39188		Nuclear genome from Caulerpa lentillifera			Cale_scf_17	45.833	24	13	0	67	90	531594	531523	9.9
Brhy	TRINITY_DN13570_c0_g1_i1|m.38915		Nuclear genome from Caulerpa lentillifera			Cale_scf_12	85.778	225	32	0	163	387	20910	21584	1.15e-164
Brhy	TRINITY_DN13570_c0_g1_i1|m.38915		Nuclear genome from Caulerpa lentillifera			Cale_scf_12	84.524	84	13	0	80	163	20609	20860	1.15e-164
Brhy	TRINITY_DN13570_c0_g1_i1|m.38915		Nuclear genome from Caulerpa lentillifera			Cale_scf_12	52.941	51	7	1	47	80	20404	20556	1.15e-164
Brhy	TRINITY_DN13570_c0_g1_i1|m.38915		Nuclear genome from Caulerpa lentillifera			Cale_scf_6	85.778	225	32	0	163	387	10507	9833	8.2e-156
Brhy	TRINITY_DN13570_c0_g1_i1|m.38915		Nuclear genome from Caulerpa lentillifera			Cale_scf_6	55.629	151	31	4	47	163	11001	10555	8.2e-156
Brhy	TRINITY_DN13570_c0_g1_i1|m.38915		Nuclear genome from Caulerpa lentillifera			Cale_scf_6	26.752	157	106	4	119	269	502914	503375	1.1e-12
Brhy	TRINITY_DN13570_c0_g1_i1|m.38915		Nuclear genome from Caulerpa lentillifera			Cale_scf_4	36.207	58	27	2	76	127	646528	646367	0.54
Brhy	TRINITY_DN13570_c0_g1_i1|m.38915		Nuclear genome from Caulerpa lentillifera			Cale_scf_3	40	30	18	0	40	69	307663	307574	1.8
Brhy	TRINITY_DN13570_c0_g1_i1|m.38915		Nuclear genome from Caulerpa lentillifera			Cale_scf_10	22.286	175	106	9	52	210	767137	766655	2.9
Brhy	TRINITY_DN13570_c0_g1_i1|m.38915		Nuclear genome from Caulerpa lentillifera			Cale_scf_26	45.833	24	13	0	48	71	257307	257378	3.6
Brhy	TRINITY_DN13570_c0_g1_i1|m.38915		Nuclear genome from Caulerpa lentillifera			Cale_scf_47	30	40	28	0	279	318	31472	31353	7.2
Brhy	TRINITY_DN13612_c0_g1_i1|m.40084		Nuclear genome from Caulerpa lentillifera			Cale_scf_2	74.897	243	61	0	99	341	747651	748379	6.11e-118
Brhy	TRINITY_DN13612_c0_g1_i1|m.40084		Nuclear genome from Caulerpa lentillifera			Cale_scf_2	47.28	239	107	5	102	339	1132307	1131645	1.04e-51
Brhy	TRINITY_DN13612_c0_g1_i1|m.40084		Nuclear genome from Caulerpa lentillifera			Cale_scf_5	75.105	237	59	0	105	341	441837	441127	1.42e-111
Brhy	TRINITY_DN13612_c0_g1_i1|m.40084		Nuclear genome from Caulerpa lentillifera			Cale_scf_5	47.28	239	107	5	102	339	188757	189419	3.57e-52
Brhy	TRINITY_DN13612_c0_g1_i1|m.40084		Nuclear genome from Caulerpa lentillifera			Cale_scf_10	44.898	245	113	7	89	331	612668	613342	8.61e-52
Brhy	TRINITY_DN13612_c0_g1_i1|m.40084		Nuclear genome from Caulerpa lentillifera			Cale_scf_15	47.28	239	107	5	102	339	510164	509502	8.69e-52
Brhy	TRINITY_DN13612_c0_g1_i1|m.40084		Nuclear genome from Caulerpa lentillifera			Cale_scf_24	47.479	238	106	5	102	338	434436	435095	1.43e-51
Brhy	TRINITY_DN13612_c0_g1_i1|m.40084		Nuclear genome from Caulerpa lentillifera			Cale_scf_17	43.089	246	108	4	102	331	25999	25310	6.01e-51
Brhy	TRINITY_DN13612_c0_g1_i1|m.40084		Nuclear genome from Caulerpa lentillifera			Cale_scf_21	44.749	219	104	3	114	331	36917	36309	1.9e-48
Brhy	TRINITY_DN13612_c0_g1_i1|m.40084		Nuclear genome from Caulerpa lentillifera			Cale_scf_13	43.154	241	106	6	103	329	523450	524121	4.32e-48
Brhy	TRINITY_DN13612_c0_g1_i1|m.40084		Nuclear genome from Caulerpa lentillifera			Cale_scf_6	39.109	202	84	5	133	329	185563	185060	1.46e-29
Brhy	TRINITY_DN13612_c0_g1_i1|m.40084		Nuclear genome from Caulerpa lentillifera			Cale_scf_7	36.073	219	123	6	124	333	323861	324493	5.66e-26
Brhy	TRINITY_DN13612_c0_g1_i1|m.40084		Nuclear genome from Caulerpa lentillifera			Cale_scf_23	35.268	224	113	9	108	331	456687	457262	4.52e-25
Brhy	TRINITY_DN13612_c0_g1_i1|m.40084		Nuclear genome from Caulerpa lentillifera			Cale_scf_26	64.103	78	28	0	254	331	223456	223689	1.33e-24
Brhy	TRINITY_DN13612_c0_g1_i1|m.40084		Nuclear genome from Caulerpa lentillifera			Cale_scf_26	46.226	106	54	2	102	206	222869	223180	6.01e-22
Brhy	TRINITY_DN13612_c0_g1_i1|m.40084		Nuclear genome from Caulerpa lentillifera			Cale_scf_26	31.148	61	39	1	136	196	223495	223668	0.16
Brhy	TRINITY_DN13612_c0_g1_i1|m.40084		Nuclear genome from Caulerpa lentillifera			Cale_scf_26	42.857	35	20	0	268	302	222968	223072	0.62
Brhy	TRINITY_DN13612_c0_g1_i1|m.40084		Nuclear genome from Caulerpa lentillifera			Cale_scf_3	64.103	78	28	0	254	331	963387	963620	1.34e-24
Brhy	TRINITY_DN13612_c0_g1_i1|m.40084		Nuclear genome from Caulerpa lentillifera			Cale_scf_3	43.86	114	61	2	102	214	962810	963145	1.73e-22
Brhy	TRINITY_DN13612_c0_g1_i1|m.40084		Nuclear genome from Caulerpa lentillifera			Cale_scf_3	44.737	114	39	3	249	341	874600	874932	9.41e-18
Brhy	TRINITY_DN13612_c0_g1_i1|m.40084		Nuclear genome from Caulerpa lentillifera			Cale_scf_3	52.308	65	26	1	265	329	372447	372268	1.55e-13
Brhy	TRINITY_DN13612_c0_g1_i1|m.40084		Nuclear genome from Caulerpa lentillifera			Cale_scf_3	57.143	49	21	0	126	174	874247	874393	7.9e-10
Brhy	TRINITY_DN13612_c0_g1_i1|m.40084		Nuclear genome from Caulerpa lentillifera			Cale_scf_3	40	50	30	0	125	174	372848	372699	7.88e-05
Brhy	TRINITY_DN13612_c0_g1_i1|m.40084		Nuclear genome from Caulerpa lentillifera			Cale_scf_3	42.857	35	20	0	268	302	874280	874384	0.093
Brhy	TRINITY_DN13612_c0_g1_i1|m.40084		Nuclear genome from Caulerpa lentillifera			Cale_scf_3	31.148	61	39	1	136	196	963426	963599	0.16
Brhy	TRINITY_DN13612_c0_g1_i1|m.40084		Nuclear genome from Caulerpa lentillifera			Cale_scf_3	42.857	35	20	0	268	302	962909	963013	0.64
Brhy	TRINITY_DN13612_c0_g1_i1|m.40084		Nuclear genome from Caulerpa lentillifera			Cale_scf_14	33.48	227	120	8	107	333	765288	764701	1.06e-23
Brhy	TRINITY_DN13612_c0_g1_i1|m.40084		Nuclear genome from Caulerpa lentillifera			Cale_scf_4	40.566	106	57	2	97	202	1220547	1220846	1.93e-16
Brhy	TRINITY_DN13612_c0_g1_i1|m.40084		Nuclear genome from Caulerpa lentillifera			Cale_scf_4	53.247	77	33	3	260	334	1221082	1221309	5.33e-15
Brhy	TRINITY_DN13612_c0_g1_i1|m.40084		Nuclear genome from Caulerpa lentillifera			Cale_scf_4	43.478	69	38	1	250	317	1022315	1022109	7.7e-09
Brhy	TRINITY_DN13612_c0_g1_i1|m.40084		Nuclear genome from Caulerpa lentillifera			Cale_scf_4	30.631	111	28	4	109	175	1022845	1022528	0.001
Brhy	TRINITY_DN13612_c0_g1_i1|m.40084		Nuclear genome from Caulerpa lentillifera			Cale_scf_4	37.037	54	33	1	258	310	1220619	1220780	0.078
Brhy	TRINITY_DN13612_c0_g1_i1|m.40084		Nuclear genome from Caulerpa lentillifera			Cale_scf_4	47.059	34	16	1	277	308	1022623	1022522	1.3
Brhy	TRINITY_DN13612_c0_g1_i1|m.40084		Nuclear genome from Caulerpa lentillifera			Cale_scf_34	57.143	77	30	3	260	334	207370	207597	2.63e-16
Brhy	TRINITY_DN13612_c0_g1_i1|m.40084		Nuclear genome from Caulerpa lentillifera			Cale_scf_34	47.727	88	40	2	104	191	206856	207101	6.03e-16
Brhy	TRINITY_DN13612_c0_g1_i1|m.40084		Nuclear genome from Caulerpa lentillifera			Cale_scf_34	37.037	54	33	1	258	310	206907	207068	0.078
Brhy	TRINITY_DN13612_c0_g1_i1|m.40084		Nuclear genome from Caulerpa lentillifera			Cale_scf_19	31.752	274	96	11	102	317	25483	26205	4.42e-13
Brhy	TRINITY_DN13612_c0_g1_i2|m.40089		Nuclear genome from Caulerpa lentillifera			Cale_scf_2	74.897	243	61	0	58	300	747651	748379	1.1e-118
Brhy	TRINITY_DN13612_c0_g1_i2|m.40089		Nuclear genome from Caulerpa lentillifera			Cale_scf_2	46.444	239	109	5	61	298	1132307	1131645	4.27e-52
Brhy	TRINITY_DN13612_c0_g1_i2|m.40089		Nuclear genome from Caulerpa lentillifera			Cale_scf_5	75.949	237	57	0	64	300	441837	441127	3.35e-112
Brhy	TRINITY_DN13612_c0_g1_i2|m.40089		Nuclear genome from Caulerpa lentillifera			Cale_scf_5	45.565	248	115	6	52	298	188733	189419	1.67e-52
Brhy	TRINITY_DN13612_c0_g1_i2|m.40089		Nuclear genome from Caulerpa lentillifera			Cale_scf_15	46.444	239	109	5	61	298	510164	509502	3.3e-52
Brhy	TRINITY_DN13612_c0_g1_i2|m.40089		Nuclear genome from Caulerpa lentillifera			Cale_scf_24	46.639	238	108	5	61	297	434436	435095	5.59e-52
Brhy	TRINITY_DN13612_c0_g1_i2|m.40089		Nuclear genome from Caulerpa lentillifera			Cale_scf_10	42.688	253	123	7	48	298	612668	613366	1.38e-51
Brhy	TRINITY_DN13612_c0_g1_i2|m.40089		Nuclear genome from Caulerpa lentillifera			Cale_scf_17	41.339	254	117	4	61	298	25999	25286	3.81e-51
Brhy	TRINITY_DN13612_c0_g1_i2|m.40089		Nuclear genome from Caulerpa lentillifera			Cale_scf_13	43.568	241	105	6	62	288	523450	524121	6.12e-49
Brhy	TRINITY_DN13612_c0_g1_i2|m.40089		Nuclear genome from Caulerpa lentillifera			Cale_scf_21	43.636	220	107	3	80	298	36896	36285	9.24e-49
Brhy	TRINITY_DN13612_c0_g1_i2|m.40089		Nuclear genome from Caulerpa lentillifera			Cale_scf_6	38.191	199	90	4	92	288	185563	185060	3.41e-30
Brhy	TRINITY_DN13612_c0_g1_i2|m.40089		Nuclear genome from Caulerpa lentillifera			Cale_scf_23	35.345	232	102	8	67	290	456687	457262	8.95e-27
Brhy	TRINITY_DN13612_c0_g1_i2|m.40089		Nuclear genome from Caulerpa lentillifera			Cale_scf_7	36.986	219	121	6	83	292	323861	324493	9.66e-27
Brhy	TRINITY_DN13612_c0_g1_i2|m.40089		Nuclear genome from Caulerpa lentillifera			Cale_scf_26	64.103	78	28	0	213	290	223456	223689	9.24e-25
Brhy	TRINITY_DN13612_c0_g1_i2|m.40089		Nuclear genome from Caulerpa lentillifera			Cale_scf_26	44.737	114	60	2	61	173	222869	223204	2.69e-22
Brhy	TRINITY_DN13612_c0_g1_i2|m.40089		Nuclear genome from Caulerpa lentillifera			Cale_scf_26	31.148	61	39	1	95	155	223495	223668	0.11
Brhy	TRINITY_DN13612_c0_g1_i2|m.40089		Nuclear genome from Caulerpa lentillifera			Cale_scf_26	42.857	35	20	0	227	261	222968	223072	0.75
Brhy	TRINITY_DN13612_c0_g1_i2|m.40089		Nuclear genome from Caulerpa lentillifera			Cale_scf_3	64.103	78	28	0	213	290	963387	963620	9.25e-25
Brhy	TRINITY_DN13612_c0_g1_i2|m.40089		Nuclear genome from Caulerpa lentillifera			Cale_scf_3	44.737	114	60	2	61	173	962810	963145	8.02e-23
Brhy	TRINITY_DN13612_c0_g1_i2|m.40089		Nuclear genome from Caulerpa lentillifera			Cale_scf_3	48.515	101	35	3	214	300	874639	874932	7.74e-18
Brhy	TRINITY_DN13612_c0_g1_i2|m.40089		Nuclear genome from Caulerpa lentillifera			Cale_scf_3	52.308	65	26	1	224	288	372447	372268	6.35e-14
Brhy	TRINITY_DN13612_c0_g1_i2|m.40089		Nuclear genome from Caulerpa lentillifera			Cale_scf_3	55.102	49	22	0	85	133	874247	874393	1.42e-09
Brhy	TRINITY_DN13612_c0_g1_i2|m.40089		Nuclear genome from Caulerpa lentillifera			Cale_scf_3	37.255	51	32	0	84	134	372848	372696	0.000203
Brhy	TRINITY_DN13612_c0_g1_i2|m.40089		Nuclear genome from Caulerpa lentillifera			Cale_scf_3	42.857	35	20	0	227	261	874280	874384	0.1
Brhy	TRINITY_DN13612_c0_g1_i2|m.40089		Nuclear genome from Caulerpa lentillifera			Cale_scf_3	31.148	61	39	1	95	155	963426	963599	0.11
Brhy	TRINITY_DN13612_c0_g1_i2|m.40089		Nuclear genome from Caulerpa lentillifera			Cale_scf_3	42.857	35	20	0	227	261	962909	963013	0.85
Brhy	TRINITY_DN13612_c0_g1_i2|m.40089		Nuclear genome from Caulerpa lentillifera			Cale_scf_14	33.48	227	120	8	66	292	765288	764701	3.59e-24
Brhy	TRINITY_DN13612_c0_g1_i2|m.40089		Nuclear genome from Caulerpa lentillifera			Cale_scf_34	56.41	78	31	3	218	293	207367	207597	1.16e-16
Brhy	TRINITY_DN13612_c0_g1_i2|m.40089		Nuclear genome from Caulerpa lentillifera			Cale_scf_34	41.414	99	52	2	63	161	206856	207134	1.67e-15
Brhy	TRINITY_DN13612_c0_g1_i2|m.40089		Nuclear genome from Caulerpa lentillifera			Cale_scf_34	37.037	54	33	1	217	269	206907	207068	0.072
Brhy	TRINITY_DN13612_c0_g1_i2|m.40089		Nuclear genome from Caulerpa lentillifera			Cale_scf_4	39.623	106	58	2	56	161	1220547	1220846	4.33e-16
Brhy	TRINITY_DN13612_c0_g1_i2|m.40089		Nuclear genome from Caulerpa lentillifera			Cale_scf_4	53.333	75	32	3	221	293	1221088	1221309	2.42e-15
Brhy	TRINITY_DN13612_c0_g1_i2|m.40089		Nuclear genome from Caulerpa lentillifera			Cale_scf_4	42.466	73	41	1	205	276	1022327	1022109	4.97e-09
Brhy	TRINITY_DN13612_c0_g1_i2|m.40089		Nuclear genome from Caulerpa lentillifera			Cale_scf_4	30.631	111	28	3	68	134	1022845	1022528	0.000356
Brhy	TRINITY_DN13612_c0_g1_i2|m.40089		Nuclear genome from Caulerpa lentillifera			Cale_scf_4	37.037	54	33	1	217	269	1220619	1220780	0.072
Brhy	TRINITY_DN13612_c0_g1_i2|m.40089		Nuclear genome from Caulerpa lentillifera			Cale_scf_4	47.059	34	16	1	236	267	1022623	1022522	0.85
Brhy	TRINITY_DN13612_c0_g1_i2|m.40089		Nuclear genome from Caulerpa lentillifera			Cale_scf_19	31.597	288	106	10	61	290	25483	26247	2e-13
Brhy	TRINITY_DN13742_c1_g1_i3|m.46210		Nuclear genome from Caulerpa lentillifera			Cale_scf_2	36.508	126	53	2	1	99	425615	425992	1.25e-18
Brhy	TRINITY_DN13742_c1_g1_i3|m.46210		Nuclear genome from Caulerpa lentillifera			Cale_scf_10	22.917	96	67	1	11	99	631371	631658	0.09
Brhy	TRINITY_DN13742_c1_g1_i3|m.46210		Nuclear genome from Caulerpa lentillifera			Cale_scf_28	40.741	27	16	0	72	98	159790	159870	0.091
Brhy	TRINITY_DN13742_c1_g1_i3|m.46210		Nuclear genome from Caulerpa lentillifera			Cale_scf_18	26.761	71	38	3	37	101	328570	328382	1.3
Brhy	TRINITY_DN13742_c1_g1_i3|m.46210		Nuclear genome from Caulerpa lentillifera			Cale_scf_11	24.615	65	35	2	35	99	698487	698639	1.8
Brhy	TRINITY_DN13742_c1_g1_i3|m.46210		Nuclear genome from Caulerpa lentillifera			Cale_scf_9	47.826	23	12	0	33	55	333135	333203	4.1
Brhy	TRINITY_DN13742_c1_g1_i3|m.46210		Nuclear genome from Caulerpa lentillifera			Cale_scf_41	30.159	63	42	1	38	100	64295	64113	5.1
Brhy	TRINITY_DN13742_c1_g1_i6|m.46216		Nuclear genome from Caulerpa lentillifera			Cale_scf_2	36.508	126	53	2	1	99	425615	425992	1.25e-18
Brhy	TRINITY_DN13742_c1_g1_i6|m.46216		Nuclear genome from Caulerpa lentillifera			Cale_scf_10	22.917	96	67	1	11	99	631371	631658	0.09
Brhy	TRINITY_DN13742_c1_g1_i6|m.46216		Nuclear genome from Caulerpa lentillifera			Cale_scf_28	40.741	27	16	0	72	98	159790	159870	0.091
Brhy	TRINITY_DN13742_c1_g1_i6|m.46216		Nuclear genome from Caulerpa lentillifera			Cale_scf_18	26.761	71	38	3	37	101	328570	328382	1.3
Brhy	TRINITY_DN13742_c1_g1_i6|m.46216		Nuclear genome from Caulerpa lentillifera			Cale_scf_11	24.615	65	35	2	35	99	698487	698639	1.8
Brhy	TRINITY_DN13742_c1_g1_i6|m.46216		Nuclear genome from Caulerpa lentillifera			Cale_scf_9	47.826	23	12	0	33	55	333135	333203	4.1
Brhy	TRINITY_DN13742_c1_g1_i6|m.46216		Nuclear genome from Caulerpa lentillifera			Cale_scf_41	30.159	63	42	1	38	100	64295	64113	5.1
Brhy	TRINITY_DN14030_c0_g1_i1|m.9923		Nuclear genome from Caulerpa lentillifera			Cale_scf_34	51.587	252	74	4	300	503	161630	162385	2.23e-74
Brhy	TRINITY_DN14030_c0_g1_i1|m.9923		Nuclear genome from Caulerpa lentillifera			Cale_scf_34	46.639	238	85	3	122	318	160929	161639	4.23e-59
Brhy	TRINITY_DN14030_c0_g1_i1|m.9923		Nuclear genome from Caulerpa lentillifera			Cale_scf_9	32.713	376	188	13	146	501	70609	69617	4.81e-49
Brhy	TRINITY_DN14030_c0_g1_i1|m.9923		Nuclear genome from Caulerpa lentillifera			Cale_scf_9	30.392	102	66	1	285	386	830453	830163	4e-09
Brhy	TRINITY_DN14030_c0_g1_i1|m.9923		Nuclear genome from Caulerpa lentillifera			Cale_scf_9	44.828	58	27	1	303	355	745564	745391	2.71e-06
Brhy	TRINITY_DN14030_c0_g1_i1|m.9923		Nuclear genome from Caulerpa lentillifera			Cale_scf_9	26.415	53	36	1	303	352	613239	613081	0.039
Brhy	TRINITY_DN14030_c0_g1_i1|m.9923		Nuclear genome from Caulerpa lentillifera			Cale_scf_9	35.417	48	26	1	310	352	189745	189888	0.19
Brhy	TRINITY_DN14030_c0_g1_i1|m.9923		Nuclear genome from Caulerpa lentillifera			Cale_scf_9	28.75	80	51	2	305	380	636265	636032	0.19
Brhy	TRINITY_DN14030_c0_g1_i1|m.9923		Nuclear genome from Caulerpa lentillifera			Cale_scf_9	61.905	21	8	0	318	338	789787	789725	0.62
Brhy	TRINITY_DN14030_c0_g1_i1|m.9923		Nuclear genome from Caulerpa lentillifera			Cale_scf_19	35.294	323	167	11	210	501	169913	170848	7.19e-49
Brhy	TRINITY_DN14030_c0_g1_i1|m.9923		Nuclear genome from Caulerpa lentillifera			Cale_scf_19	25.185	135	66	4	297	422	597321	596995	1.16e-05
Brhy	TRINITY_DN14030_c0_g1_i1|m.9923		Nuclear genome from Caulerpa lentillifera			Cale_scf_19	47.5	40	21	0	313	352	130427	130308	0.000107
Brhy	TRINITY_DN14030_c0_g1_i1|m.9923		Nuclear genome from Caulerpa lentillifera			Cale_scf_19	50	34	17	0	317	350	794962	794861	0.006
Brhy	TRINITY_DN14030_c0_g1_i1|m.9923		Nuclear genome from Caulerpa lentillifera			Cale_scf_19	34.286	70	31	3	325	381	670856	670653	0.088
Brhy	TRINITY_DN14030_c0_g1_i1|m.9923		Nuclear genome from Caulerpa lentillifera			Cale_scf_19	38	50	27	2	306	352	306668	306814	0.24
Brhy	TRINITY_DN14030_c0_g1_i1|m.9923		Nuclear genome from Caulerpa lentillifera			Cale_scf_19	30.233	86	41	3	314	384	85933	85688	1.4
Brhy	TRINITY_DN14030_c0_g1_i1|m.9923		Nuclear genome from Caulerpa lentillifera			Cale_scf_19	36.667	30	19	0	326	355	563182	563093	1.5
Brhy	TRINITY_DN14030_c0_g1_i1|m.9923		Nuclear genome from Caulerpa lentillifera			Cale_scf_19	28.261	46	31	1	317	360	578139	578276	2.7
Brhy	TRINITY_DN14030_c0_g1_i1|m.9923		Nuclear genome from Caulerpa lentillifera			Cale_scf_19	40	25	15	0	326	350	191976	192050	5.3
Brhy	TRINITY_DN14030_c0_g1_i1|m.9923		Nuclear genome from Caulerpa lentillifera			Cale_scf_20	30.769	182	91	9	293	467	324206	323745	4.91e-09
Brhy	TRINITY_DN14030_c0_g1_i1|m.9923		Nuclear genome from Caulerpa lentillifera			Cale_scf_20	29.944	177	91	10	297	464	347526	347984	1.11e-07
Brhy	TRINITY_DN14030_c0_g1_i1|m.9923		Nuclear genome from Caulerpa lentillifera			Cale_scf_20	29.944	177	87	10	293	464	413271	412837	2.41e-05
Brhy	TRINITY_DN14030_c0_g1_i1|m.9923		Nuclear genome from Caulerpa lentillifera			Cale_scf_20	23.684	228	106	10	153	378	168829	168344	0.008
Brhy	TRINITY_DN14030_c0_g1_i1|m.9923		Nuclear genome from Caulerpa lentillifera			Cale_scf_20	33.333	78	41	2	312	378	471748	471515	0.014
Brhy	TRINITY_DN14030_c0_g1_i1|m.9923		Nuclear genome from Caulerpa lentillifera			Cale_scf_20	36	50	30	1	305	352	460838	460689	0.046
Brhy	TRINITY_DN14030_c0_g1_i1|m.9923		Nuclear genome from Caulerpa lentillifera			Cale_scf_20	26.786	56	41	0	301	356	10831	10664	0.096
Brhy	TRINITY_DN14030_c0_g1_i1|m.9923		Nuclear genome from Caulerpa lentillifera			Cale_scf_20	35	40	26	0	317	356	102746	102865	0.15
Brhy	TRINITY_DN14030_c0_g1_i1|m.9923		Nuclear genome from Caulerpa lentillifera			Cale_scf_20	27.273	77	29	3	303	352	326633	326863	3.8
Brhy	TRINITY_DN14030_c0_g1_i1|m.9923		Nuclear genome from Caulerpa lentillifera			Cale_scf_2	35.632	87	49	2	290	376	680491	680730	1.62e-07
Brhy	TRINITY_DN14030_c0_g1_i1|m.9923		Nuclear genome from Caulerpa lentillifera			Cale_scf_2	39.13	69	40	1	308	376	868860	869060	3.16e-05
Brhy	TRINITY_DN14030_c0_g1_i1|m.9923		Nuclear genome from Caulerpa lentillifera			Cale_scf_2	35.065	77	47	2	305	380	146090	145866	0.016
Brhy	TRINITY_DN14030_c0_g1_i1|m.9923		Nuclear genome from Caulerpa lentillifera			Cale_scf_2	36.842	57	30	2	302	352	1194928	1195098	0.27
Brhy	TRINITY_DN14030_c0_g1_i1|m.9923		Nuclear genome from Caulerpa lentillifera			Cale_scf_13	38.333	60	37	0	305	364	603729	603550	2.29e-07
Brhy	TRINITY_DN14030_c0_g1_i1|m.9923		Nuclear genome from Caulerpa lentillifera			Cale_scf_13	40.541	74	33	2	315	378	99317	99535	7.33e-07
Brhy	TRINITY_DN14030_c0_g1_i1|m.9923		Nuclear genome from Caulerpa lentillifera			Cale_scf_13	48.718	39	20	0	314	352	69894	69778	0.000233
Brhy	TRINITY_DN14030_c0_g1_i1|m.9923		Nuclear genome from Caulerpa lentillifera			Cale_scf_13	29.231	65	31	1	303	352	754984	755178	0.007
Brhy	TRINITY_DN14030_c0_g1_i1|m.9923		Nuclear genome from Caulerpa lentillifera			Cale_scf_13	37.736	53	30	2	326	376	263729	263574	0.29
Brhy	TRINITY_DN14030_c0_g1_i1|m.9923		Nuclear genome from Caulerpa lentillifera			Cale_scf_33	36.667	90	44	4	315	404	49964	50194	2.43e-07
Brhy	TRINITY_DN14030_c0_g1_i1|m.9923		Nuclear genome from Caulerpa lentillifera			Cale_scf_33	30.928	97	55	3	288	379	71761	71492	0.000491
Brhy	TRINITY_DN14030_c0_g1_i1|m.9923		Nuclear genome from Caulerpa lentillifera			Cale_scf_33	33.803	71	38	2	284	350	23355	23552	0.000531
Brhy	TRINITY_DN14030_c0_g1_i1|m.9923		Nuclear genome from Caulerpa lentillifera			Cale_scf_33	34.545	55	31	1	284	338	11033	10884	0.002
Brhy	TRINITY_DN14030_c0_g1_i1|m.9923		Nuclear genome from Caulerpa lentillifera			Cale_scf_33	32.692	52	31	1	318	369	45817	45960	0.29
Brhy	TRINITY_DN14030_c0_g1_i1|m.9923		Nuclear genome from Caulerpa lentillifera			Cale_scf_33	34.091	44	29	0	318	361	4821	4690	0.71
Brhy	TRINITY_DN14030_c0_g1_i1|m.9923		Nuclear genome from Caulerpa lentillifera			Cale_scf_26	43.75	48	27	0	305	352	215695	215838	2.77e-07
Brhy	TRINITY_DN14030_c0_g1_i1|m.9923		Nuclear genome from Caulerpa lentillifera			Cale_scf_26	26.708	161	86	6	310	463	187906	188313	7.72e-07
Brhy	TRINITY_DN14030_c0_g1_i1|m.9923		Nuclear genome from Caulerpa lentillifera			Cale_scf_26	36.486	74	42	3	307	378	534761	534973	2.47e-05
Brhy	TRINITY_DN14030_c0_g1_i1|m.9923		Nuclear genome from Caulerpa lentillifera			Cale_scf_26	40	60	34	1	317	376	22495	22668	2.93e-05
Brhy	TRINITY_DN14030_c0_g1_i1|m.9923		Nuclear genome from Caulerpa lentillifera			Cale_scf_26	41.667	36	21	0	308	343	359841	359734	0.002
Brhy	TRINITY_DN14030_c0_g1_i1|m.9923		Nuclear genome from Caulerpa lentillifera			Cale_scf_26	50	28	14	0	329	356	332878	332795	0.006
Brhy	TRINITY_DN14030_c0_g1_i1|m.9923		Nuclear genome from Caulerpa lentillifera			Cale_scf_26	34.694	49	31	1	306	353	303146	303292	0.028
Brhy	TRINITY_DN14030_c0_g1_i1|m.9923		Nuclear genome from Caulerpa lentillifera			Cale_scf_3	40.678	59	35	0	306	364	987806	987630	4.58e-07
Brhy	TRINITY_DN14030_c0_g1_i1|m.9923		Nuclear genome from Caulerpa lentillifera			Cale_scf_3	44.231	52	25	1	304	355	1227172	1227029	4.16e-05
Brhy	TRINITY_DN14030_c0_g1_i1|m.9923		Nuclear genome from Caulerpa lentillifera			Cale_scf_3	34.722	72	42	3	307	376	360570	360364	4.72e-05
Brhy	TRINITY_DN14030_c0_g1_i1|m.9923		Nuclear genome from Caulerpa lentillifera			Cale_scf_3	31.897	116	49	5	317	426	498212	497937	0.00048
Brhy	TRINITY_DN14030_c0_g1_i1|m.9923		Nuclear genome from Caulerpa lentillifera			Cale_scf_3	33.898	59	35	1	296	350	494055	494231	0.1
Brhy	TRINITY_DN14030_c0_g1_i1|m.9923		Nuclear genome from Caulerpa lentillifera			Cale_scf_3	44.444	36	19	1	317	352	17660	17764	0.2
Brhy	TRINITY_DN14030_c0_g1_i1|m.9923		Nuclear genome from Caulerpa lentillifera			Cale_scf_3	45	40	13	1	326	356	533930	534049	0.46
Brhy	TRINITY_DN14030_c0_g1_i1|m.9923		Nuclear genome from Caulerpa lentillifera			Cale_scf_3	44.444	27	15	0	326	352	929942	929862	0.61
Brhy	TRINITY_DN14030_c0_g1_i1|m.9923		Nuclear genome from Caulerpa lentillifera			Cale_scf_24	32.979	94	60	2	287	379	407460	407735	4.66e-07
Brhy	TRINITY_DN14030_c0_g1_i1|m.9923		Nuclear genome from Caulerpa lentillifera			Cale_scf_24	51.163	43	21	0	308	350	359625	359753	3.56e-06
Brhy	TRINITY_DN14030_c0_g1_i1|m.9923		Nuclear genome from Caulerpa lentillifera			Cale_scf_24	38.889	54	26	1	308	354	16857	16696	0.002
Brhy	TRINITY_DN14030_c0_g1_i1|m.9923		Nuclear genome from Caulerpa lentillifera			Cale_scf_16	37.079	89	40	4	293	376	518277	518510	5.63e-07
Brhy	TRINITY_DN14030_c0_g1_i1|m.9923		Nuclear genome from Caulerpa lentillifera			Cale_scf_16	29.143	175	95	9	297	464	636499	636957	5.82e-07
Brhy	TRINITY_DN14030_c0_g1_i1|m.9923		Nuclear genome from Caulerpa lentillifera			Cale_scf_16	27.684	177	91	9	293	464	380089	379655	0.000827
Brhy	TRINITY_DN14030_c0_g1_i1|m.9923		Nuclear genome from Caulerpa lentillifera			Cale_scf_16	30.435	69	45	2	309	376	810818	810618	0.001
Brhy	TRINITY_DN14030_c0_g1_i1|m.9923		Nuclear genome from Caulerpa lentillifera			Cale_scf_16	34.783	46	27	1	310	352	445958	446095	0.009
Brhy	TRINITY_DN14030_c0_g1_i1|m.9923		Nuclear genome from Caulerpa lentillifera			Cale_scf_16	33.333	39	26	0	314	352	721674	721790	0.011
Brhy	TRINITY_DN14030_c0_g1_i1|m.9923		Nuclear genome from Caulerpa lentillifera			Cale_scf_16	32.911	79	48	2	310	385	273082	272852	0.019
Brhy	TRINITY_DN14030_c0_g1_i1|m.9923		Nuclear genome from Caulerpa lentillifera			Cale_scf_16	36	50	30	1	305	352	413120	413269	0.052
Brhy	TRINITY_DN14030_c0_g1_i1|m.9923		Nuclear genome from Caulerpa lentillifera			Cale_scf_16	33.333	60	26	3	305	352	676784	676611	2
Brhy	TRINITY_DN14030_c0_g1_i1|m.9923		Nuclear genome from Caulerpa lentillifera			Cale_scf_16	24.464	233	121	11	140	338	352962	352327	3.1
Brhy	TRINITY_DN14030_c0_g1_i1|m.9923		Nuclear genome from Caulerpa lentillifera			Cale_scf_16	39.13	46	21	2	317	355	533455	533318	3.8
Brhy	TRINITY_DN14030_c0_g1_i1|m.9923		Nuclear genome from Caulerpa lentillifera			Cale_scf_16	28.75	80	43	4	279	350	164676	164455	6.4
Brhy	TRINITY_DN14030_c0_g1_i1|m.9923		Nuclear genome from Caulerpa lentillifera			Cale_scf_1	44.828	58	27	1	303	355	243119	243292	1.33e-06
Brhy	TRINITY_DN14030_c0_g1_i1|m.9923		Nuclear genome from Caulerpa lentillifera			Cale_scf_1	43.137	51	25	1	313	359	864515	864363	2.65e-05
Brhy	TRINITY_DN14030_c0_g1_i1|m.9923		Nuclear genome from Caulerpa lentillifera			Cale_scf_1	28.409	88	46	2	306	376	85847	85584	0.000243
Brhy	TRINITY_DN14030_c0_g1_i1|m.9923		Nuclear genome from Caulerpa lentillifera			Cale_scf_1	34.667	75	42	2	307	376	1085775	1085557	0.001
Brhy	TRINITY_DN14030_c0_g1_i1|m.9923		Nuclear genome from Caulerpa lentillifera			Cale_scf_1	38.095	63	33	2	285	347	476272	476102	0.001
Brhy	TRINITY_DN14030_c0_g1_i1|m.9923		Nuclear genome from Caulerpa lentillifera			Cale_scf_1	47.222	36	19	0	321	356	607005	606898	0.025
Brhy	TRINITY_DN14030_c0_g1_i1|m.9923		Nuclear genome from Caulerpa lentillifera			Cale_scf_1	41.026	39	21	1	321	357	612739	612623	0.032
Brhy	TRINITY_DN14030_c0_g1_i1|m.9923		Nuclear genome from Caulerpa lentillifera			Cale_scf_1	36.842	38	24	0	318	355	711335	711222	0.053
Brhy	TRINITY_DN14030_c0_g1_i1|m.9923		Nuclear genome from Caulerpa lentillifera			Cale_scf_1	33.333	39	26	0	314	352	721309	721425	0.076
Brhy	TRINITY_DN14030_c0_g1_i1|m.9923		Nuclear genome from Caulerpa lentillifera			Cale_scf_1	30.882	68	44	2	314	381	1042311	1042505	0.1
Brhy	TRINITY_DN14030_c0_g1_i1|m.9923		Nuclear genome from Caulerpa lentillifera			Cale_scf_1	59.091	22	9	0	317	338	210187	210252	0.56
Brhy	TRINITY_DN14030_c0_g1_i1|m.9923		Nuclear genome from Caulerpa lentillifera			Cale_scf_12	27.907	129	61	4	310	424	311990	311658	4.8e-06
Brhy	TRINITY_DN14030_c0_g1_i1|m.9923		Nuclear genome from Caulerpa lentillifera			Cale_scf_12	38.298	47	29	0	312	358	425505	425365	5.32e-05
Brhy	TRINITY_DN14030_c0_g1_i1|m.9923		Nuclear genome from Caulerpa lentillifera			Cale_scf_12	33.333	66	42	1	314	379	24188	24379	0.000589
Brhy	TRINITY_DN14030_c0_g1_i1|m.9923		Nuclear genome from Caulerpa lentillifera			Cale_scf_12	29.545	132	71	5	317	442	753855	753508	0.002
Brhy	TRINITY_DN14030_c0_g1_i1|m.9923		Nuclear genome from Caulerpa lentillifera			Cale_scf_12	36.066	61	28	3	293	350	13795	13953	0.009
Brhy	TRINITY_DN14030_c0_g1_i1|m.9923		Nuclear genome from Caulerpa lentillifera			Cale_scf_12	32.075	53	34	2	303	353	723895	724053	0.015
Brhy	TRINITY_DN14030_c0_g1_i1|m.9923		Nuclear genome from Caulerpa lentillifera			Cale_scf_12	38	50	29	1	306	353	485932	485783	0.024
Brhy	TRINITY_DN14030_c0_g1_i1|m.9923		Nuclear genome from Caulerpa lentillifera			Cale_scf_12	29.167	72	47	2	307	376	449636	449427	0.058
Brhy	TRINITY_DN14030_c0_g1_i1|m.9923		Nuclear genome from Caulerpa lentillifera			Cale_scf_12	42	50	23	2	305	352	189792	189655	0.16
Brhy	TRINITY_DN14030_c0_g1_i1|m.9923		Nuclear genome from Caulerpa lentillifera			Cale_scf_4	25.926	135	65	4	297	422	310034	309708	7.55e-06
Brhy	TRINITY_DN14030_c0_g1_i1|m.9923		Nuclear genome from Caulerpa lentillifera			Cale_scf_4	58.621	29	12	0	325	353	480584	480498	0.000419
Brhy	TRINITY_DN14030_c0_g1_i1|m.9923		Nuclear genome from Caulerpa lentillifera			Cale_scf_4	42.857	56	19	3	326	376	146474	146331	0.002
Brhy	TRINITY_DN14030_c0_g1_i1|m.9923		Nuclear genome from Caulerpa lentillifera			Cale_scf_4	32.468	77	43	2	309	382	35566	35778	0.002
Brhy	TRINITY_DN14030_c0_g1_i1|m.9923		Nuclear genome from Caulerpa lentillifera			Cale_scf_4	25.532	188	90	8	305	467	963508	963020	0.003
Brhy	TRINITY_DN14030_c0_g1_i1|m.9923		Nuclear genome from Caulerpa lentillifera			Cale_scf_4	38.889	36	22	0	321	356	426254	426361	0.12
Brhy	TRINITY_DN14030_c0_g1_i1|m.9923		Nuclear genome from Caulerpa lentillifera			Cale_scf_4	27.551	98	52	5	290	376	281338	281607	0.19
Brhy	TRINITY_DN14030_c0_g1_i1|m.9923		Nuclear genome from Caulerpa lentillifera			Cale_scf_4	29.787	94	55	5	290	376	278416	278147	1.2
Brhy	TRINITY_DN14030_c0_g1_i1|m.9923		Nuclear genome from Caulerpa lentillifera			Cale_scf_4	33.846	65	28	2	303	352	1201542	1201348	3.8
Brhy	TRINITY_DN14030_c0_g1_i1|m.9923		Nuclear genome from Caulerpa lentillifera			Cale_scf_4	31.707	41	27	1	313	352	158243	158365	4
Brhy	TRINITY_DN14030_c0_g1_i1|m.9923		Nuclear genome from Caulerpa lentillifera			Cale_scf_15	45.652	46	25	0	307	352	626353	626490	9.5e-06
Brhy	TRINITY_DN14030_c0_g1_i1|m.9923		Nuclear genome from Caulerpa lentillifera			Cale_scf_15	40.541	37	22	0	307	343	267552	267442	0.00025
Brhy	TRINITY_DN14030_c0_g1_i1|m.9923		Nuclear genome from Caulerpa lentillifera			Cale_scf_15	42.5	40	20	2	340	378	267407	267294	0.00025
Brhy	TRINITY_DN14030_c0_g1_i1|m.9923		Nuclear genome from Caulerpa lentillifera			Cale_scf_15	65.385	26	9	0	325	350	464675	464752	0.000518
Brhy	TRINITY_DN14030_c0_g1_i1|m.9923		Nuclear genome from Caulerpa lentillifera			Cale_scf_15	38.182	55	27	1	308	355	907655	907819	0.002
Brhy	TRINITY_DN14030_c0_g1_i1|m.9923		Nuclear genome from Caulerpa lentillifera			Cale_scf_15	31.373	51	30	1	288	338	571801	571938	0.04
Brhy	TRINITY_DN14030_c0_g1_i1|m.9923		Nuclear genome from Caulerpa lentillifera			Cale_scf_15	30.435	69	46	1	310	376	214521	214315	0.35
Brhy	TRINITY_DN14030_c0_g1_i1|m.9923		Nuclear genome from Caulerpa lentillifera			Cale_scf_15	32.258	62	23	2	314	356	59759	59574	2.4
Brhy	TRINITY_DN14030_c0_g1_i1|m.9923		Nuclear genome from Caulerpa lentillifera			Cale_scf_15	25.843	89	51	3	302	376	839411	839148	6.8
Brhy	TRINITY_DN14030_c0_g1_i1|m.9923		Nuclear genome from Caulerpa lentillifera			Cale_scf_28	28.676	136	71	4	249	382	354593	354258	2.06e-05
Brhy	TRINITY_DN14030_c0_g1_i1|m.9923		Nuclear genome from Caulerpa lentillifera			Cale_scf_28	26.712	146	79	6	261	404	333309	332950	0.000394
Brhy	TRINITY_DN14030_c0_g1_i1|m.9923		Nuclear genome from Caulerpa lentillifera			Cale_scf_28	32.184	87	48	3	301	378	198426	198172	0.001
Brhy	TRINITY_DN14030_c0_g1_i1|m.9923		Nuclear genome from Caulerpa lentillifera			Cale_scf_28	35.135	37	24	0	313	349	37490	37600	0.35
Brhy	TRINITY_DN14030_c0_g1_i1|m.9923		Nuclear genome from Caulerpa lentillifera			Cale_scf_17	22.5	160	99	3	306	443	129614	130084	3.95e-05
Brhy	TRINITY_DN14030_c0_g1_i1|m.9923		Nuclear genome from Caulerpa lentillifera			Cale_scf_17	28.082	146	71	5	297	423	278947	278555	0.000133
Brhy	TRINITY_DN14030_c0_g1_i1|m.9923		Nuclear genome from Caulerpa lentillifera			Cale_scf_17	22.222	126	66	4	260	376	73701	74009	0.003
Brhy	TRINITY_DN14030_c0_g1_i1|m.9923		Nuclear genome from Caulerpa lentillifera			Cale_scf_17	37.838	37	23	0	303	339	674721	674611	0.22
Brhy	TRINITY_DN14030_c0_g1_i1|m.9923		Nuclear genome from Caulerpa lentillifera			Cale_scf_17	51.852	27	13	0	326	352	124267	124347	0.83
Brhy	TRINITY_DN14030_c0_g1_i1|m.9923		Nuclear genome from Caulerpa lentillifera			Cale_scf_6	31.522	92	37	2	283	353	189852	190112	6.7e-05
Brhy	TRINITY_DN14030_c0_g1_i1|m.9923		Nuclear genome from Caulerpa lentillifera			Cale_scf_6	33.333	48	32	0	314	361	495390	495533	0.000564
Brhy	TRINITY_DN14030_c0_g1_i1|m.9923		Nuclear genome from Caulerpa lentillifera			Cale_scf_6	28.03	132	73	4	317	442	874087	873740	0.000663
Brhy	TRINITY_DN14030_c0_g1_i1|m.9923		Nuclear genome from Caulerpa lentillifera			Cale_scf_6	32.632	95	49	5	293	384	17733	17485	0.006
Brhy	TRINITY_DN14030_c0_g1_i1|m.9923		Nuclear genome from Caulerpa lentillifera			Cale_scf_6	28.916	83	44	3	286	353	829445	829197	0.009
Brhy	TRINITY_DN14030_c0_g1_i1|m.9923		Nuclear genome from Caulerpa lentillifera			Cale_scf_6	21.719	221	126	9	299	503	155318	154749	0.01
Brhy	TRINITY_DN14030_c0_g1_i1|m.9923		Nuclear genome from Caulerpa lentillifera			Cale_scf_6	36	50	30	1	306	353	580322	580173	0.049
Brhy	TRINITY_DN14030_c0_g1_i1|m.9923		Nuclear genome from Caulerpa lentillifera			Cale_scf_6	42	50	23	2	305	352	196908	196771	0.19
Brhy	TRINITY_DN14030_c0_g1_i1|m.9923		Nuclear genome from Caulerpa lentillifera			Cale_scf_22	28.8	125	68	5	260	378	215473	215802	0.000107
Brhy	TRINITY_DN14030_c0_g1_i1|m.9923		Nuclear genome from Caulerpa lentillifera			Cale_scf_11	29	100	64	3	304	403	159062	159340	0.000182
Brhy	TRINITY_DN14030_c0_g1_i1|m.9923		Nuclear genome from Caulerpa lentillifera			Cale_scf_11	23.793	290	120	12	145	423	84196	84795	0.009
Brhy	TRINITY_DN14030_c0_g1_i1|m.9923		Nuclear genome from Caulerpa lentillifera			Cale_scf_11	26.829	123	77	5	301	420	310807	310469	0.012
Brhy	TRINITY_DN14030_c0_g1_i1|m.9923		Nuclear genome from Caulerpa lentillifera			Cale_scf_11	34.783	46	29	1	308	352	380322	380185	0.013
Brhy	TRINITY_DN14030_c0_g1_i1|m.9923		Nuclear genome from Caulerpa lentillifera			Cale_scf_11	22.083	240	142	11	132	356	6076	6705	0.36
Brhy	TRINITY_DN14030_c0_g1_i1|m.9923		Nuclear genome from Caulerpa lentillifera			Cale_scf_11	40	45	23	2	324	365	703035	702904	0.78
Brhy	TRINITY_DN14030_c0_g1_i1|m.9923		Nuclear genome from Caulerpa lentillifera			Cale_scf_10	41.304	46	26	1	308	352	571558	571695	0.000394
Brhy	TRINITY_DN14030_c0_g1_i1|m.9923		Nuclear genome from Caulerpa lentillifera			Cale_scf_10	32.099	81	48	4	311	389	603453	603226	0.023
Brhy	TRINITY_DN14030_c0_g1_i1|m.9923		Nuclear genome from Caulerpa lentillifera			Cale_scf_10	40.625	32	19	0	321	352	660569	660474	0.034
Brhy	TRINITY_DN14030_c0_g1_i1|m.9923		Nuclear genome from Caulerpa lentillifera			Cale_scf_7	22.192	365	173	15	147	501	776126	776917	0.0008
Brhy	TRINITY_DN14030_c0_g1_i1|m.9923		Nuclear genome from Caulerpa lentillifera			Cale_scf_7	40	40	19	2	326	361	50714	50598	0.16
Brhy	TRINITY_DN14030_c0_g1_i1|m.9923		Nuclear genome from Caulerpa lentillifera			Cale_scf_7	30.952	84	31	4	311	374	656715	656945	0.51
Brhy	TRINITY_DN14030_c0_g1_i1|m.9923		Nuclear genome from Caulerpa lentillifera			Cale_scf_7	41.86	43	19	2	317	353	39348	39476	0.91
Brhy	TRINITY_DN14030_c0_g1_i1|m.9923		Nuclear genome from Caulerpa lentillifera			Cale_scf_7	33.333	42	22	1	321	356	953107	952982	2.5
Brhy	TRINITY_DN14030_c0_g1_i1|m.9923		Nuclear genome from Caulerpa lentillifera			Cale_scf_21	26.531	147	75	5	297	423	368237	368638	0.001
Brhy	TRINITY_DN14030_c0_g1_i1|m.9923		Nuclear genome from Caulerpa lentillifera			Cale_scf_21	31.25	64	34	2	321	376	233389	233204	0.004
Brhy	TRINITY_DN14030_c0_g1_i1|m.9923		Nuclear genome from Caulerpa lentillifera			Cale_scf_25	33.333	57	35	2	320	376	246645	246806	0.002
Brhy	TRINITY_DN14030_c0_g1_i1|m.9923		Nuclear genome from Caulerpa lentillifera			Cale_scf_25	39.583	48	24	1	310	352	430083	429940	0.27
Brhy	TRINITY_DN14030_c0_g1_i1|m.9923		Nuclear genome from Caulerpa lentillifera			Cale_scf_25	36.585	41	23	1	315	352	435525	435647	0.54
Brhy	TRINITY_DN14030_c0_g1_i1|m.9923		Nuclear genome from Caulerpa lentillifera			Cale_scf_23	42.553	47	26	1	307	352	54664	54524	0.002
Brhy	TRINITY_DN14030_c0_g1_i1|m.9923		Nuclear genome from Caulerpa lentillifera			Cale_scf_23	45.455	44	17	2	317	353	600223	600354	0.008
Brhy	TRINITY_DN14030_c0_g1_i1|m.9923		Nuclear genome from Caulerpa lentillifera			Cale_scf_23	50	32	15	1	322	352	100087	99992	0.054
Brhy	TRINITY_DN14030_c0_g1_i1|m.9923		Nuclear genome from Caulerpa lentillifera			Cale_scf_23	25.478	157	76	7	317	454	266405	266809	0.81
Brhy	TRINITY_DN14030_c0_g1_i1|m.9923		Nuclear genome from Caulerpa lentillifera			Cale_scf_23	25.664	113	59	4	317	425	248912	248637	1.2
Brhy	TRINITY_DN14030_c0_g1_i1|m.9923		Nuclear genome from Caulerpa lentillifera			Cale_scf_23	25.664	113	59	4	317	425	253168	252893	2
Brhy	TRINITY_DN14030_c0_g1_i1|m.9923		Nuclear genome from Caulerpa lentillifera			Cale_scf_8	34.921	63	34	2	290	350	141061	140888	0.002
Brhy	TRINITY_DN14030_c0_g1_i1|m.9923		Nuclear genome from Caulerpa lentillifera			Cale_scf_8	40.426	47	22	2	316	356	900555	900415	0.003
Brhy	TRINITY_DN14030_c0_g1_i1|m.9923		Nuclear genome from Caulerpa lentillifera			Cale_scf_8	29.231	65	39	2	290	352	142619	142440	0.44
Brhy	TRINITY_DN14030_c0_g1_i1|m.9923		Nuclear genome from Caulerpa lentillifera			Cale_scf_8	27.273	99	51	6	261	353	882246	881995	0.91
Brhy	TRINITY_DN14030_c0_g1_i1|m.9923		Nuclear genome from Caulerpa lentillifera			Cale_scf_8	34.545	55	31	2	325	376	351893	352051	6.5
Brhy	TRINITY_DN14030_c0_g1_i1|m.9923		Nuclear genome from Caulerpa lentillifera			Cale_scf_30	39.216	51	30	1	305	355	215544	215693	0.016
Brhy	TRINITY_DN14030_c0_g1_i1|m.9923		Nuclear genome from Caulerpa lentillifera			Cale_scf_30	29.31	116	52	6	317	426	69404	69679	0.018
Brhy	TRINITY_DN14030_c0_g1_i1|m.9923		Nuclear genome from Caulerpa lentillifera			Cale_scf_14	36.17	47	29	1	307	352	125506	125366	0.041
Brhy	TRINITY_DN14030_c0_g1_i1|m.9923		Nuclear genome from Caulerpa lentillifera			Cale_scf_14	38.636	44	23	1	313	352	174449	174318	0.057
Brhy	TRINITY_DN14030_c0_g1_i1|m.9923		Nuclear genome from Caulerpa lentillifera			Cale_scf_14	30.612	49	29	1	290	338	143225	143094	0.064
Brhy	TRINITY_DN14030_c0_g1_i1|m.9923		Nuclear genome from Caulerpa lentillifera			Cale_scf_14	31.081	74	46	2	310	378	302202	301981	0.3
Brhy	TRINITY_DN14030_c0_g1_i1|m.9923		Nuclear genome from Caulerpa lentillifera			Cale_scf_14	27.273	99	54	3	260	350	773027	772761	0.32
Brhy	TRINITY_DN14030_c0_g1_i1|m.9923		Nuclear genome from Caulerpa lentillifera			Cale_scf_14	24.183	153	99	6	238	378	306624	306181	9.8
Brhy	TRINITY_DN14030_c0_g1_i1|m.9923		Nuclear genome from Caulerpa lentillifera			Cale_scf_5	36.111	36	23	0	314	349	1024059	1024166	0.047
Brhy	TRINITY_DN14030_c0_g1_i1|m.9923		Nuclear genome from Caulerpa lentillifera			Cale_scf_5	38.182	55	28	2	302	350	97983	97819	0.2
Brhy	TRINITY_DN14030_c0_g1_i1|m.9923		Nuclear genome from Caulerpa lentillifera			Cale_scf_5	37.5	40	25	0	310	349	313725	313606	0.22
Brhy	TRINITY_DN14030_c0_g1_i1|m.9923		Nuclear genome from Caulerpa lentillifera			Cale_scf_5	35	40	26	0	310	349	286281	286400	0.39
Brhy	TRINITY_DN14030_c0_g1_i1|m.9923		Nuclear genome from Caulerpa lentillifera			Cale_scf_5	27.273	77	38	1	306	364	631232	631462	1.9
Brhy	TRINITY_DN14030_c0_g1_i1|m.9923		Nuclear genome from Caulerpa lentillifera			Cale_scf_32	30.986	71	47	1	310	378	229956	229744	0.13
Brhy	TRINITY_DN14030_c0_g1_i1|m.9923		Nuclear genome from Caulerpa lentillifera			Cale_scf_32	28.261	46	33	0	307	352	169512	169649	1.5
Brhy	TRINITY_DN14030_c0_g1_i1|m.9923		Nuclear genome from Caulerpa lentillifera			Cale_scf_32	32.759	58	20	2	314	352	42777	42604	5.4
Brhy	TRINITY_DN14030_c0_g1_i1|m.9923		Nuclear genome from Caulerpa lentillifera			Cale_scf_31	33.898	59	34	2	306	359	132643	132467	0.14
Brhy	TRINITY_DN14030_c0_g1_i1|m.9923		Nuclear genome from Caulerpa lentillifera			Cale_scf_39	40	50	24	1	326	369	38091	37942	0.23
Brhy	TRINITY_DN14030_c0_g1_i1|m.9923		Nuclear genome from Caulerpa lentillifera			Cale_scf_18	41.935	31	18	0	325	355	843761	843669	0.36
Brhy	TRINITY_DN14030_c0_g1_i1|m.9923		Nuclear genome from Caulerpa lentillifera			Cale_scf_18	33.898	59	33	1	281	339	417243	417085	0.39
Brhy	TRINITY_DN14030_c0_g1_i1|m.9923		Nuclear genome from Caulerpa lentillifera			Cale_scf_18	30.508	59	36	1	306	359	10056	10232	0.46
Brhy	TRINITY_DN14030_c0_g1_i1|m.9923		Nuclear genome from Caulerpa lentillifera			Cale_scf_18	40	35	17	1	325	355	101475	101579	2.4
Brhy	TRINITY_DN14077_c0_g1_i2|m.9836		Nuclear genome from Caulerpa lentillifera			Cale_scf_6	54.802	177	50	3	240	386	312875	313405	1.45e-88
Brhy	TRINITY_DN14077_c0_g1_i2|m.9836		Nuclear genome from Caulerpa lentillifera			Cale_scf_6	59.524	84	34	0	154	237	312579	312830	1.45e-88
Brhy	TRINITY_DN14077_c0_g1_i2|m.9836		Nuclear genome from Caulerpa lentillifera			Cale_scf_6	58.824	51	21	0	104	154	312388	312540	1.45e-88
Brhy	TRINITY_DN14077_c0_g1_i2|m.9836		Nuclear genome from Caulerpa lentillifera			Cale_scf_17	35.417	48	29	1	148	195	511722	511585	4.4
Brhy	TRINITY_DN14101_c1_g1_i1|m.1958		Nuclear genome from Caulerpa lentillifera			Cale_scf_6	86.455	347	45	2	64	409	879051	880088	0
Brhy	TRINITY_DN14101_c1_g1_i1|m.1958		Nuclear genome from Caulerpa lentillifera			Cale_scf_12	86.667	345	44	2	64	407	756130	757161	0
Brhy	TRINITY_DN14101_c1_g1_i1|m.1958		Nuclear genome from Caulerpa lentillifera			Cale_scf_18	43.617	376	183	8	46	399	491147	490041	4.31e-76
Brhy	TRINITY_DN14101_c1_g1_i1|m.1958		Nuclear genome from Caulerpa lentillifera			Cale_scf_21	35.897	39	25	0	92	130	625463	625579	6.6
Brhy	TRINITY_DN14101_c1_g1_i2|m.1964		Nuclear genome from Caulerpa lentillifera			Cale_scf_6	84.726	347	51	2	64	409	879051	880088	0
Brhy	TRINITY_DN14101_c1_g1_i2|m.1964		Nuclear genome from Caulerpa lentillifera			Cale_scf_12	84.928	345	50	2	64	407	756130	757161	0
Brhy	TRINITY_DN14101_c1_g1_i2|m.1964		Nuclear genome from Caulerpa lentillifera			Cale_scf_18	42.819	376	186	8	46	399	491147	490041	9.18e-87
Brhy	TRINITY_DN14101_c1_g1_i2|m.1964		Nuclear genome from Caulerpa lentillifera			Cale_scf_21	35.897	39	25	0	92	130	625463	625579	6.7
Brhy	TRINITY_DN14101_c1_g1_i2|m.1964		Nuclear genome from Caulerpa lentillifera			Cale_scf_2	37.209	43	24	1	184	226	105202	105321	9.3
Brhy	TRINITY_DN14101_c1_g1_i3|m.1970		Nuclear genome from Caulerpa lentillifera			Cale_scf_6	86.377	345	45	2	64	407	879051	880082	0
Brhy	TRINITY_DN14101_c1_g1_i3|m.1970		Nuclear genome from Caulerpa lentillifera			Cale_scf_12	86.377	345	45	2	64	407	756130	757161	0
Brhy	TRINITY_DN14101_c1_g1_i3|m.1970		Nuclear genome from Caulerpa lentillifera			Cale_scf_18	43.617	376	183	8	46	399	491147	490041	7.33e-77
Brhy	TRINITY_DN14101_c1_g1_i3|m.1970		Nuclear genome from Caulerpa lentillifera			Cale_scf_21	35.897	39	25	0	92	130	625463	625579	6.7
Brhy	TRINITY_DN14101_c1_g1_i3|m.1970		Nuclear genome from Caulerpa lentillifera			Cale_scf_2	37.209	43	24	1	184	226	105202	105321	8
Brhy	TRINITY_DN14114_c1_g1_i1|m.1835		Nuclear genome from Caulerpa lentillifera			Cale_scf_5	80.952	105	20	0	1	105	188739	189053	3.5e-56
Brhy	TRINITY_DN14114_c1_g1_i1|m.1835		Nuclear genome from Caulerpa lentillifera			Cale_scf_5	44.792	96	49	3	10	103	441837	441556	1.66e-17
Brhy	TRINITY_DN14114_c1_g1_i1|m.1835		Nuclear genome from Caulerpa lentillifera			Cale_scf_5	32.353	68	40	2	18	85	189156	189341	0.08
Brhy	TRINITY_DN14114_c1_g1_i1|m.1835		Nuclear genome from Caulerpa lentillifera			Cale_scf_15	80.952	105	20	0	1	105	510182	509868	7.46e-56
Brhy	TRINITY_DN14114_c1_g1_i1|m.1835		Nuclear genome from Caulerpa lentillifera			Cale_scf_15	32.353	68	40	2	18	85	509765	509580	0.075
Brhy	TRINITY_DN14114_c1_g1_i1|m.1835		Nuclear genome from Caulerpa lentillifera			Cale_scf_2	80.952	105	20	0	1	105	1132325	1132011	8.06e-56
Brhy	TRINITY_DN14114_c1_g1_i1|m.1835		Nuclear genome from Caulerpa lentillifera			Cale_scf_2	43.564	101	54	2	7	105	747660	747959	4.41e-20
Brhy	TRINITY_DN14114_c1_g1_i1|m.1835		Nuclear genome from Caulerpa lentillifera			Cale_scf_2	32.353	68	40	2	18	85	1131908	1131723	0.097
Brhy	TRINITY_DN14114_c1_g1_i1|m.1835		Nuclear genome from Caulerpa lentillifera			Cale_scf_24	80	105	21	0	1	105	434418	434732	3.88e-55
Brhy	TRINITY_DN14114_c1_g1_i1|m.1835		Nuclear genome from Caulerpa lentillifera			Cale_scf_24	32.353	68	40	2	18	85	434835	435020	0.084
Brhy	TRINITY_DN14114_c1_g1_i1|m.1835		Nuclear genome from Caulerpa lentillifera			Cale_scf_17	70.492	122	19	1	1	105	26017	25652	6.69e-53
Brhy	TRINITY_DN14114_c1_g1_i1|m.1835		Nuclear genome from Caulerpa lentillifera			Cale_scf_17	33.962	53	34	1	33	85	25519	25364	0.094
Brhy	TRINITY_DN14114_c1_g1_i1|m.1835		Nuclear genome from Caulerpa lentillifera			Cale_scf_3	73.333	105	28	0	1	105	962792	963106	2.68e-50
Brhy	TRINITY_DN14114_c1_g1_i1|m.1835		Nuclear genome from Caulerpa lentillifera			Cale_scf_3	51.064	47	23	0	34	80	874262	874402	8.39e-09
Brhy	TRINITY_DN14114_c1_g1_i1|m.1835		Nuclear genome from Caulerpa lentillifera			Cale_scf_3	41.818	55	29	1	35	89	372827	372672	0.00012
Brhy	TRINITY_DN14114_c1_g1_i1|m.1835		Nuclear genome from Caulerpa lentillifera			Cale_scf_3	33.824	68	39	1	18	85	963381	963566	0.13
Brhy	TRINITY_DN14114_c1_g1_i1|m.1835		Nuclear genome from Caulerpa lentillifera			Cale_scf_3	41.667	24	14	0	34	57	255746	255675	1.4
Brhy	TRINITY_DN14114_c1_g1_i1|m.1835		Nuclear genome from Caulerpa lentillifera			Cale_scf_3	50	26	11	2	26	50	359882	359808	7.1
Brhy	TRINITY_DN14114_c1_g1_i1|m.1835		Nuclear genome from Caulerpa lentillifera			Cale_scf_26	72.381	105	29	0	1	105	222851	223165	1.15e-49
Brhy	TRINITY_DN14114_c1_g1_i1|m.1835		Nuclear genome from Caulerpa lentillifera			Cale_scf_26	33.824	68	39	1	18	85	223450	223635	0.13
Brhy	TRINITY_DN14114_c1_g1_i1|m.1835		Nuclear genome from Caulerpa lentillifera			Cale_scf_21	82.955	88	15	0	18	105	36914	36651	6.93e-47
Brhy	TRINITY_DN14114_c1_g1_i1|m.1835		Nuclear genome from Caulerpa lentillifera			Cale_scf_21	72.222	18	5	0	1	18	37018	36965	0.015
Brhy	TRINITY_DN14114_c1_g1_i1|m.1835		Nuclear genome from Caulerpa lentillifera			Cale_scf_21	32.353	68	40	2	18	85	36548	36363	0.086
Brhy	TRINITY_DN14114_c1_g1_i1|m.1835		Nuclear genome from Caulerpa lentillifera			Cale_scf_13	74.49	98	24	1	8	105	523450	523740	1.43e-45
Brhy	TRINITY_DN14114_c1_g1_i1|m.1835		Nuclear genome from Caulerpa lentillifera			Cale_scf_13	32.353	68	41	1	18	85	523885	524073	0.011
Brhy	TRINITY_DN14114_c1_g1_i1|m.1835		Nuclear genome from Caulerpa lentillifera			Cale_scf_10	73.469	98	25	1	8	105	612707	612997	1.01e-43
Brhy	TRINITY_DN14114_c1_g1_i1|m.1835		Nuclear genome from Caulerpa lentillifera			Cale_scf_10	33.333	54	36	0	32	85	613127	613288	0.086
Brhy	TRINITY_DN14114_c1_g1_i1|m.1835		Nuclear genome from Caulerpa lentillifera			Cale_scf_10	30.435	46	32	0	19	64	754612	754749	5.4
Brhy	TRINITY_DN14114_c1_g1_i1|m.1835		Nuclear genome from Caulerpa lentillifera			Cale_scf_34	39.583	96	53	2	1	96	206832	207104	1.49e-13
Brhy	TRINITY_DN14114_c1_g1_i1|m.1835		Nuclear genome from Caulerpa lentillifera			Cale_scf_4	39.583	96	53	2	1	96	1220544	1220816	3.32e-13
Brhy	TRINITY_DN14114_c1_g1_i1|m.1835		Nuclear genome from Caulerpa lentillifera			Cale_scf_4	28.866	97	25	2	26	78	1022818	1022528	0.000164
Brhy	TRINITY_DN14114_c1_g1_i1|m.1835		Nuclear genome from Caulerpa lentillifera			Cale_scf_23	50.943	53	26	0	26	78	456717	456875	9.04e-10
Brhy	TRINITY_DN14114_c1_g1_i1|m.1835		Nuclear genome from Caulerpa lentillifera			Cale_scf_14	44.118	68	33	2	12	78	765288	765097	5.91e-09
Brhy	TRINITY_DN14114_c1_g1_i1|m.1835		Nuclear genome from Caulerpa lentillifera			Cale_scf_7	42.683	82	38	4	27	100	323861	324103	2.09e-08
Brhy	TRINITY_DN14114_c1_g1_i1|m.1835		Nuclear genome from Caulerpa lentillifera			Cale_scf_6	48.837	43	22	0	36	78	185563	185435	5.49e-08
Brhy	TRINITY_DN14114_c1_g1_i1|m.1835		Nuclear genome from Caulerpa lentillifera			Cale_scf_19	27.835	97	26	2	26	78	25528	25818	0.000567
Brhy	TRINITY_DN14114_c1_g1_i1|m.1835		Nuclear genome from Caulerpa lentillifera			Cale_scf_19	35.897	39	25	0	33	71	26035	26151	5.3
Brhy	TRINITY_DN14368_c0_g2_i1|m.13752		Nuclear genome from Caulerpa lentillifera			Cale_scf_28	58.824	102	42	0	134	235	159423	159728	2.91e-36
Brhy	TRINITY_DN14368_c0_g2_i1|m.13752		Nuclear genome from Caulerpa lentillifera			Cale_scf_28	51.515	33	16	0	236	268	159778	159876	2.91e-36
Brhy	TRINITY_DN14368_c0_g2_i1|m.13752		Nuclear genome from Caulerpa lentillifera			Cale_scf_28	72.222	36	10	0	98	133	159066	159173	6.77e-15
Brhy	TRINITY_DN14368_c0_g2_i1|m.13752		Nuclear genome from Caulerpa lentillifera			Cale_scf_28	35	60	31	2	44	97	158849	159022	6.77e-15
Brhy	TRINITY_DN14368_c0_g2_i1|m.13752		Nuclear genome from Caulerpa lentillifera			Cale_scf_2	22.603	146	91	2	145	268	425558	425995	0.013
Brhy	TRINITY_DN14368_c0_g2_i1|m.13752		Nuclear genome from Caulerpa lentillifera			Cale_scf_1	22.951	61	47	0	206	266	426939	426757	0.13
Brhy	TRINITY_DN14368_c0_g2_i1|m.13752		Nuclear genome from Caulerpa lentillifera			Cale_scf_1	21.705	258	128	11	30	257	458253	458894	1.2
Brhy	TRINITY_DN14368_c0_g2_i1|m.13752		Nuclear genome from Caulerpa lentillifera			Cale_scf_8	23.913	92	58	2	107	198	742835	742596	2
Brhy	TRINITY_DN14368_c0_g2_i1|m.13752		Nuclear genome from Caulerpa lentillifera			Cale_scf_10	20	65	52	0	202	266	631461	631655	4.3
Brhy	TRINITY_DN14368_c0_g2_i1|m.13752		Nuclear genome from Caulerpa lentillifera			Cale_scf_4	23.776	143	87	4	33	165	715756	716148	4.4
Brhy	TRINITY_DN14368_c0_g2_i1|m.13752		Nuclear genome from Caulerpa lentillifera			Cale_scf_44	34.286	35	23	0	100	134	21794	21690	8.7
Brhy	TRINITY_DN14450_c0_g1_i1|m.3591		Nuclear genome from Caulerpa lentillifera			Cale_scf_13	40	135	81	0	126	260	608437	608033	8.46e-28
Brhy	TRINITY_DN14450_c0_g1_i1|m.3591		Nuclear genome from Caulerpa lentillifera			Cale_scf_3	26.923	78	45	2	169	246	792763	792960	7.5
Brhy	TRINITY_DN14711_c0_g1_i1|m.30440		Nuclear genome from Caulerpa lentillifera			Cale_scf_16	55.147	136	42	2	140	256	131405	131812	2.15e-39
Brhy	TRINITY_DN14711_c0_g1_i1|m.30440		Nuclear genome from Caulerpa lentillifera			Cale_scf_16	75	16	4	0	146	161	131377	131424	0.35
Brhy	TRINITY_DN14711_c0_g1_i1|m.30440		Nuclear genome from Caulerpa lentillifera			Cale_scf_13	33.333	69	30	2	141	205	597789	597619	0.007
Brhy	TRINITY_DN14711_c0_g1_i1|m.30440		Nuclear genome from Caulerpa lentillifera			Cale_scf_19	33.871	62	32	3	150	209	112530	112366	0.054
Brhy	TRINITY_DN14711_c0_g1_i1|m.30440		Nuclear genome from Caulerpa lentillifera			Cale_scf_36	41.379	29	17	0	187	215	36229	36143	0.12
Brhy	TRINITY_DN14711_c0_g1_i1|m.30440		Nuclear genome from Caulerpa lentillifera			Cale_scf_4	32.787	61	34	3	150	209	779018	778854	0.29
Brhy	TRINITY_DN14711_c0_g1_i1|m.30440		Nuclear genome from Caulerpa lentillifera			Cale_scf_31	41.379	29	17	0	187	215	13599	13513	0.47
Brhy	TRINITY_DN14711_c0_g1_i1|m.30440		Nuclear genome from Caulerpa lentillifera			Cale_scf_23	31.081	74	42	3	140	205	119303	119521	0.64
Brhy	TRINITY_DN14711_c0_g1_i1|m.30440		Nuclear genome from Caulerpa lentillifera			Cale_scf_21	38.235	34	21	0	172	205	326487	326588	0.8
Brhy	TRINITY_DN14711_c0_g1_i1|m.30440		Nuclear genome from Caulerpa lentillifera			Cale_scf_18	43.396	53	20	2	154	206	669325	669453	2.7
Brhy	TRINITY_DN14715_c0_g2_i1|m.30729		Nuclear genome from Caulerpa lentillifera			Cale_scf_3	54.945	91	41	0	139	229	372465	372193	3.51e-52
Brhy	TRINITY_DN14715_c0_g2_i1|m.30729		Nuclear genome from Caulerpa lentillifera			Cale_scf_3	44.248	113	41	2	48	138	372848	372510	3.51e-52
Brhy	TRINITY_DN14715_c0_g2_i1|m.30729		Nuclear genome from Caulerpa lentillifera			Cale_scf_3	42.222	45	22	2	9	53	373000	372878	3.51e-52
Brhy	TRINITY_DN14715_c0_g2_i1|m.30729		Nuclear genome from Caulerpa lentillifera			Cale_scf_3	34.066	91	46	1	17	93	874109	874381	7.28e-12
Brhy	TRINITY_DN14715_c0_g2_i1|m.30729		Nuclear genome from Caulerpa lentillifera			Cale_scf_3	43.137	51	29	0	155	205	874756	874908	2.03e-08
Brhy	TRINITY_DN14715_c0_g2_i1|m.30729		Nuclear genome from Caulerpa lentillifera			Cale_scf_3	36.842	95	50	4	119	205	963339	963617	2.7e-08
Brhy	TRINITY_DN14715_c0_g2_i1|m.30729		Nuclear genome from Caulerpa lentillifera			Cale_scf_3	43.75	48	27	0	46	93	962867	963010	2.47e-06
Brhy	TRINITY_DN14715_c0_g2_i1|m.30729		Nuclear genome from Caulerpa lentillifera			Cale_scf_3	42.424	33	19	0	59	91	963426	963524	0.31
Brhy	TRINITY_DN14715_c0_g2_i1|m.30729		Nuclear genome from Caulerpa lentillifera			Cale_scf_14	44.33	194	82	5	36	205	765285	764710	3.43e-43
Brhy	TRINITY_DN14715_c0_g2_i1|m.30729		Nuclear genome from Caulerpa lentillifera			Cale_scf_23	44.041	193	83	5	36	205	456687	457259	4.15e-41
Brhy	TRINITY_DN14715_c0_g2_i1|m.30729		Nuclear genome from Caulerpa lentillifera			Cale_scf_7	30.043	233	107	8	26	205	323795	324484	1.31e-19
Brhy	TRINITY_DN14715_c0_g2_i1|m.30729		Nuclear genome from Caulerpa lentillifera			Cale_scf_2	29.63	216	94	7	48	210	747729	748361	4.13e-18
Brhy	TRINITY_DN14715_c0_g2_i1|m.30729		Nuclear genome from Caulerpa lentillifera			Cale_scf_2	31.163	215	100	8	35	205	1132292	1131660	4.62e-18
Brhy	TRINITY_DN14715_c0_g2_i1|m.30729		Nuclear genome from Caulerpa lentillifera			Cale_scf_15	31.019	216	101	8	35	206	510149	509514	5.37e-18
Brhy	TRINITY_DN14715_c0_g2_i1|m.30729		Nuclear genome from Caulerpa lentillifera			Cale_scf_5	31.163	215	100	8	35	205	188772	189404	8.61e-18
Brhy	TRINITY_DN14715_c0_g2_i1|m.30729		Nuclear genome from Caulerpa lentillifera			Cale_scf_5	30.332	211	99	7	48	210	441777	441145	5.55e-17
Brhy	TRINITY_DN14715_c0_g2_i1|m.30729		Nuclear genome from Caulerpa lentillifera			Cale_scf_24	30.698	215	101	8	35	205	434451	435083	1.85e-17
Brhy	TRINITY_DN14715_c0_g2_i1|m.30729		Nuclear genome from Caulerpa lentillifera			Cale_scf_34	51.389	72	34	1	22	93	206829	207041	6.32e-17
Brhy	TRINITY_DN14715_c0_g2_i1|m.30729		Nuclear genome from Caulerpa lentillifera			Cale_scf_34	38.961	77	44	1	132	205	207358	207588	1.13e-09
Brhy	TRINITY_DN14715_c0_g2_i1|m.30729		Nuclear genome from Caulerpa lentillifera			Cale_scf_4	53.731	67	27	1	31	93	1220553	1220753	6.7e-17
Brhy	TRINITY_DN14715_c0_g2_i1|m.30729		Nuclear genome from Caulerpa lentillifera			Cale_scf_4	38.961	77	44	1	132	205	1221070	1221300	9.53e-10
Brhy	TRINITY_DN14715_c0_g2_i1|m.30729		Nuclear genome from Caulerpa lentillifera			Cale_scf_4	46	50	21	1	147	190	1022264	1022115	4.89e-05
Brhy	TRINITY_DN14715_c0_g2_i1|m.30729		Nuclear genome from Caulerpa lentillifera			Cale_scf_4	28.155	103	30	1	39	97	1022839	1022531	0.000534
Brhy	TRINITY_DN14715_c0_g2_i1|m.30729		Nuclear genome from Caulerpa lentillifera			Cale_scf_10	30.882	204	95	7	45	206	612755	613354	7.29e-17
Brhy	TRINITY_DN14715_c0_g2_i1|m.30729		Nuclear genome from Caulerpa lentillifera			Cale_scf_10	29.032	62	42	1	63	124	416285	416106	9.6
Brhy	TRINITY_DN14715_c0_g2_i1|m.30729		Nuclear genome from Caulerpa lentillifera			Cale_scf_6	29.825	171	99	4	56	206	185563	185054	7.72e-17
Brhy	TRINITY_DN14715_c0_g2_i1|m.30729		Nuclear genome from Caulerpa lentillifera			Cale_scf_21	31.841	201	92	8	46	205	36890	36300	1.78e-16
Brhy	TRINITY_DN14715_c0_g2_i1|m.30729		Nuclear genome from Caulerpa lentillifera			Cale_scf_17	31.343	201	93	8	46	205	25891	25301	5.15e-16
Brhy	TRINITY_DN14715_c0_g2_i1|m.30729		Nuclear genome from Caulerpa lentillifera			Cale_scf_17	25.455	55	30	2	127	177	62988	63131	7.9
Brhy	TRINITY_DN14715_c0_g2_i1|m.30729		Nuclear genome from Caulerpa lentillifera			Cale_scf_13	28.761	226	105	8	35	206	523462	524133	1.68e-14
Brhy	TRINITY_DN14715_c0_g2_i1|m.30729		Nuclear genome from Caulerpa lentillifera			Cale_scf_19	25.847	236	86	7	39	190	25507	26199	2.78e-10
Brhy	TRINITY_DN14715_c0_g2_i1|m.30729		Nuclear genome from Caulerpa lentillifera			Cale_scf_26	36.842	95	50	4	119	205	223408	223686	2.69e-08
Brhy	TRINITY_DN14715_c0_g2_i1|m.30729		Nuclear genome from Caulerpa lentillifera			Cale_scf_26	43.75	48	27	0	46	93	222926	223069	2.68e-06
Brhy	TRINITY_DN14715_c0_g2_i1|m.30729		Nuclear genome from Caulerpa lentillifera			Cale_scf_26	42.424	33	19	0	59	91	223495	223593	0.31
Brhy	TRINITY_DN14715_c0_g2_i1|m.30729		Nuclear genome from Caulerpa lentillifera			Cale_scf_37	36.066	61	35	3	46	103	6472	6651	3.5
Brhy	TRINITY_DN14730_c2_g1_i1|m.30859		Nuclear genome from Caulerpa lentillifera			Cale_scf_3	44.66	206	87	3	117	295	608023	608640	3.47e-45
Brhy	TRINITY_DN14730_c2_g1_i1|m.30859		Nuclear genome from Caulerpa lentillifera			Cale_scf_15	35.185	54	26	2	34	78	486394	486233	6.4
Brhy	TRINITY_DN15063_c0_g1_i1|m.27665		Nuclear genome from Caulerpa lentillifera			Cale_scf_3	49.02	102	38	1	101	188	557543	557238	4.56e-23
Brhy	TRINITY_DN15063_c0_g1_i1|m.27665		Nuclear genome from Caulerpa lentillifera			Cale_scf_3	57.143	28	12	0	189	216	557191	557108	4.56e-23
Brhy	TRINITY_DN15063_c0_g1_i1|m.27665		Nuclear genome from Caulerpa lentillifera			Cale_scf_10	24	50	38	0	115	164	881130	880981	4.4
Brhy	TRINITY_DN15063_c0_g1_i1|m.27665		Nuclear genome from Caulerpa lentillifera			Cale_scf_16	36.364	44	24	2	159	199	417275	417403	7.2
Brhy	TRINITY_DN15063_c0_g1_i2|m.27668		Nuclear genome from Caulerpa lentillifera			Cale_scf_3	49.02	102	38	1	101	188	557543	557238	4.56e-23
Brhy	TRINITY_DN15063_c0_g1_i2|m.27668		Nuclear genome from Caulerpa lentillifera			Cale_scf_3	57.143	28	12	0	189	216	557191	557108	4.56e-23
Brhy	TRINITY_DN15063_c0_g1_i2|m.27668		Nuclear genome from Caulerpa lentillifera			Cale_scf_10	24	50	38	0	115	164	881130	880981	4.4
Brhy	TRINITY_DN15063_c0_g1_i2|m.27668		Nuclear genome from Caulerpa lentillifera			Cale_scf_16	36.364	44	24	2	159	199	417275	417403	7.2
Brhy	TRINITY_DN15534_c0_g1_i1|m.12095		Nuclear genome from Caulerpa lentillifera			Cale_scf_34	73.016	63	17	0	95	157	206841	207029	1.71e-26
Brhy	TRINITY_DN15534_c0_g1_i1|m.12095		Nuclear genome from Caulerpa lentillifera			Cale_scf_4	78.947	57	12	0	101	157	1220571	1220741	2.94e-26
Brhy	TRINITY_DN15534_c0_g1_i1|m.12095		Nuclear genome from Caulerpa lentillifera			Cale_scf_4	29.747	158	58	5	50	157	1023019	1022555	1e-09
Brhy	TRINITY_DN15534_c0_g1_i1|m.12095		Nuclear genome from Caulerpa lentillifera			Cale_scf_4	48.571	35	16	2	122	155	1022276	1022175	0.27
Brhy	TRINITY_DN15534_c0_g1_i1|m.12095		Nuclear genome from Caulerpa lentillifera			Cale_scf_3	52.632	76	22	1	95	156	874139	874366	7.2e-20
Brhy	TRINITY_DN15534_c0_g1_i1|m.12095		Nuclear genome from Caulerpa lentillifera			Cale_scf_3	39.726	73	32	3	49	121	373060	372878	5.32e-15
Brhy	TRINITY_DN15534_c0_g1_i1|m.12095		Nuclear genome from Caulerpa lentillifera			Cale_scf_3	48.78	41	21	0	117	157	372845	372723	5.32e-15
Brhy	TRINITY_DN15534_c0_g1_i1|m.12095		Nuclear genome from Caulerpa lentillifera			Cale_scf_3	51.064	47	23	0	111	157	962858	962998	3.39e-11
Brhy	TRINITY_DN15534_c0_g1_i1|m.12095		Nuclear genome from Caulerpa lentillifera			Cale_scf_3	41.304	46	26	1	110	155	963378	963512	0.1
Brhy	TRINITY_DN15534_c0_g1_i1|m.12095		Nuclear genome from Caulerpa lentillifera			Cale_scf_14	53.125	64	30	0	94	157	765315	765124	2.77e-18
Brhy	TRINITY_DN15534_c0_g1_i1|m.12095		Nuclear genome from Caulerpa lentillifera			Cale_scf_23	44.706	85	42	2	73	157	456609	456848	8.85e-16
Brhy	TRINITY_DN15534_c0_g1_i1|m.12095		Nuclear genome from Caulerpa lentillifera			Cale_scf_5	33.898	118	60	4	48	157	188622	188945	5.9e-14
Brhy	TRINITY_DN15534_c0_g1_i1|m.12095		Nuclear genome from Caulerpa lentillifera			Cale_scf_5	57.143	42	18	0	116	157	441777	441652	2.44e-10
Brhy	TRINITY_DN15534_c0_g1_i1|m.12095		Nuclear genome from Caulerpa lentillifera			Cale_scf_5	43.902	41	22	1	115	155	189168	189287	0.022
Brhy	TRINITY_DN15534_c0_g1_i1|m.12095		Nuclear genome from Caulerpa lentillifera			Cale_scf_19	30.128	156	59	4	47	157	25339	25791	8.8e-13
Brhy	TRINITY_DN15534_c0_g1_i1|m.12095		Nuclear genome from Caulerpa lentillifera			Cale_scf_19	50	36	16	2	122	156	26038	26142	0.058
Brhy	TRINITY_DN15534_c0_g1_i1|m.12095		Nuclear genome from Caulerpa lentillifera			Cale_scf_2	37.5	96	51	3	71	157	1132406	1132119	1.06e-12
Brhy	TRINITY_DN15534_c0_g1_i1|m.12095		Nuclear genome from Caulerpa lentillifera			Cale_scf_2	58.537	41	17	0	116	156	747729	747851	2.96e-10
Brhy	TRINITY_DN15534_c0_g1_i1|m.12095		Nuclear genome from Caulerpa lentillifera			Cale_scf_2	43.902	41	22	1	115	155	1131896	1131777	0.021
Brhy	TRINITY_DN15534_c0_g1_i1|m.12095		Nuclear genome from Caulerpa lentillifera			Cale_scf_2	28.947	38	27	0	89	126	317499	317612	7.9
Brhy	TRINITY_DN15534_c0_g1_i1|m.12095		Nuclear genome from Caulerpa lentillifera			Cale_scf_15	39.024	82	42	2	84	157	510221	509976	4.78e-12
Brhy	TRINITY_DN15534_c0_g1_i1|m.12095		Nuclear genome from Caulerpa lentillifera			Cale_scf_15	43.902	41	22	1	115	155	509753	509634	0.017
Brhy	TRINITY_DN15534_c0_g1_i1|m.12095		Nuclear genome from Caulerpa lentillifera			Cale_scf_26	38.961	77	40	2	84	157	222839	223057	4.35e-11
Brhy	TRINITY_DN15534_c0_g1_i1|m.12095		Nuclear genome from Caulerpa lentillifera			Cale_scf_26	41.304	46	26	1	110	155	223447	223581	0.1
Brhy	TRINITY_DN15534_c0_g1_i1|m.12095		Nuclear genome from Caulerpa lentillifera			Cale_scf_26	51.429	35	11	2	24	52	437215	437111	6.4
Brhy	TRINITY_DN15534_c0_g1_i1|m.12095		Nuclear genome from Caulerpa lentillifera			Cale_scf_24	41.379	58	31	1	103	157	434451	434624	9.37e-11
Brhy	TRINITY_DN15534_c0_g1_i1|m.12095		Nuclear genome from Caulerpa lentillifera			Cale_scf_24	43.902	41	22	1	115	155	434847	434966	0.017
Brhy	TRINITY_DN15534_c0_g1_i1|m.12095		Nuclear genome from Caulerpa lentillifera			Cale_scf_21	52.273	44	21	0	114	157	36890	36759	1.06e-10
Brhy	TRINITY_DN15534_c0_g1_i1|m.12095		Nuclear genome from Caulerpa lentillifera			Cale_scf_21	43.902	41	22	1	115	155	36536	36417	0.017
Brhy	TRINITY_DN15534_c0_g1_i1|m.12095		Nuclear genome from Caulerpa lentillifera			Cale_scf_13	50	58	25	2	103	157	523462	523632	2.85e-10
Brhy	TRINITY_DN15534_c0_g1_i1|m.12095		Nuclear genome from Caulerpa lentillifera			Cale_scf_13	46.341	41	22	0	115	155	523897	524019	0.003
Brhy	TRINITY_DN15534_c0_g1_i1|m.12095		Nuclear genome from Caulerpa lentillifera			Cale_scf_13	44.444	27	15	0	70	96	776079	776159	7.7
Brhy	TRINITY_DN15534_c0_g1_i1|m.12095		Nuclear genome from Caulerpa lentillifera			Cale_scf_17	52.273	44	21	0	114	157	25891	25760	1.27e-09
Brhy	TRINITY_DN15534_c0_g1_i1|m.12095		Nuclear genome from Caulerpa lentillifera			Cale_scf_17	43.59	39	21	1	117	155	25531	25418	0.074
Brhy	TRINITY_DN15534_c0_g1_i1|m.12095		Nuclear genome from Caulerpa lentillifera			Cale_scf_10	50	46	23	0	112	157	612752	612889	7.46e-09
Brhy	TRINITY_DN15534_c0_g1_i1|m.12095		Nuclear genome from Caulerpa lentillifera			Cale_scf_10	41.304	46	27	0	110	155	613097	613234	0.088
Brhy	TRINITY_DN15534_c0_g1_i1|m.12095		Nuclear genome from Caulerpa lentillifera			Cale_scf_6	57.576	33	14	0	124	156	185563	185465	1.58e-07
Brhy	TRINITY_DN15534_c0_g1_i1|m.12095		Nuclear genome from Caulerpa lentillifera			Cale_scf_6	48.276	29	15	0	127	155	185248	185162	0.33
Brhy	TRINITY_DN15534_c0_g1_i1|m.12095		Nuclear genome from Caulerpa lentillifera			Cale_scf_7	43.103	58	27	2	106	157	323834	324007	6.79e-07
Brhy	TRINITY_DN15534_c0_g1_i1|m.12095		Nuclear genome from Caulerpa lentillifera			Cale_scf_16	34.146	41	27	0	17	57	381365	381243	1.2
Brhy	TRINITY_DN15534_c0_g1_i1|m.12095		Nuclear genome from Caulerpa lentillifera			Cale_scf_8	31.818	66	41	2	6	71	811538	811723	1.6
Brhy	TRINITY_DN15534_c0_g1_i1|m.12095		Nuclear genome from Caulerpa lentillifera			Cale_scf_27	24.176	91	65	2	34	121	218476	218745	7
Brhy	TRINITY_DN15534_c2_g3_i1|m.12096		Nuclear genome from Caulerpa lentillifera			Cale_scf_2	70.149	268	67	4	7	272	1132424	1131654	9.57e-120
Brhy	TRINITY_DN15534_c2_g3_i1|m.12096		Nuclear genome from Caulerpa lentillifera			Cale_scf_2	45.133	226	106	5	56	264	747660	748334	1.83e-53
Brhy	TRINITY_DN15534_c2_g3_i1|m.12096		Nuclear genome from Caulerpa lentillifera			Cale_scf_5	71.815	259	63	4	21	272	188643	189410	3.85e-119
Brhy	TRINITY_DN15534_c2_g3_i1|m.12096		Nuclear genome from Caulerpa lentillifera			Cale_scf_5	44.395	223	106	5	59	264	441837	441172	6.84e-46
Brhy	TRINITY_DN15534_c2_g3_i1|m.12096		Nuclear genome from Caulerpa lentillifera			Cale_scf_15	75.319	235	55	2	40	272	510212	509511	1.61e-117
Brhy	TRINITY_DN15534_c2_g3_i1|m.12096		Nuclear genome from Caulerpa lentillifera			Cale_scf_24	75.983	229	52	2	46	272	434406	435089	3.67e-115
Brhy	TRINITY_DN15534_c2_g3_i1|m.12096		Nuclear genome from Caulerpa lentillifera			Cale_scf_17	69.076	249	57	3	43	272	26038	25295	6.94e-111
Brhy	TRINITY_DN15534_c2_g3_i1|m.12096		Nuclear genome from Caulerpa lentillifera			Cale_scf_13	59.532	299	88	6	4	272	523249	524136	1.54e-104
Brhy	TRINITY_DN15534_c2_g3_i1|m.12096		Nuclear genome from Caulerpa lentillifera			Cale_scf_10	73.973	219	52	4	57	272	612707	613357	3.48e-102
Brhy	TRINITY_DN15534_c2_g3_i1|m.12096		Nuclear genome from Caulerpa lentillifera			Cale_scf_21	75	208	49	2	67	272	36914	36294	5.89e-101
Brhy	TRINITY_DN15534_c2_g3_i1|m.12096		Nuclear genome from Caulerpa lentillifera			Cale_scf_21	69.565	23	7	0	45	67	37033	36965	0.0003
Brhy	TRINITY_DN15534_c2_g3_i1|m.12096		Nuclear genome from Caulerpa lentillifera			Cale_scf_3	76.378	127	30	0	48	174	962786	963166	4.79e-62
Brhy	TRINITY_DN15534_c2_g3_i1|m.12096		Nuclear genome from Caulerpa lentillifera			Cale_scf_3	66.981	106	32	2	170	273	963324	963638	4.59e-40
Brhy	TRINITY_DN15534_c2_g3_i1|m.12096		Nuclear genome from Caulerpa lentillifera			Cale_scf_3	47.436	78	28	1	200	264	874663	874896	2.74e-15
Brhy	TRINITY_DN15534_c2_g3_i1|m.12096		Nuclear genome from Caulerpa lentillifera			Cale_scf_3	55	60	22	1	205	264	372441	372277	1.16e-14
Brhy	TRINITY_DN15534_c2_g3_i1|m.12096		Nuclear genome from Caulerpa lentillifera			Cale_scf_3	50	52	26	0	78	129	874247	874402	1.25e-09
Brhy	TRINITY_DN15534_c2_g3_i1|m.12096		Nuclear genome from Caulerpa lentillifera			Cale_scf_3	42.424	66	30	1	82	147	372833	372660	2.58e-06
Brhy	TRINITY_DN15534_c2_g3_i1|m.12096		Nuclear genome from Caulerpa lentillifera			Cale_scf_3	32.258	62	37	1	184	245	874229	874399	0.002
Brhy	TRINITY_DN15534_c2_g3_i1|m.12096		Nuclear genome from Caulerpa lentillifera			Cale_scf_3	34.043	47	31	0	88	134	963426	963566	0.63
Brhy	TRINITY_DN15534_c2_g3_i1|m.12096		Nuclear genome from Caulerpa lentillifera			Cale_scf_26	75	128	32	0	47	174	222842	223225	1.41e-61
Brhy	TRINITY_DN15534_c2_g3_i1|m.12096		Nuclear genome from Caulerpa lentillifera			Cale_scf_26	69	100	28	2	176	273	223411	223707	3.83e-40
Brhy	TRINITY_DN15534_c2_g3_i1|m.12096		Nuclear genome from Caulerpa lentillifera			Cale_scf_26	34.043	47	31	0	88	134	223495	223635	0.63
Brhy	TRINITY_DN15534_c2_g3_i1|m.12096		Nuclear genome from Caulerpa lentillifera			Cale_scf_6	42.541	181	87	5	85	264	185563	185069	6.42e-34
Brhy	TRINITY_DN15534_c2_g3_i1|m.12096		Nuclear genome from Caulerpa lentillifera			Cale_scf_23	34.672	274	127	10	5	264	456540	457247	4.32e-31
Brhy	TRINITY_DN15534_c2_g3_i1|m.12096		Nuclear genome from Caulerpa lentillifera			Cale_scf_7	32.986	288	148	11	9	264	323648	324472	6.89e-29
Brhy	TRINITY_DN15534_c2_g3_i1|m.12096		Nuclear genome from Caulerpa lentillifera			Cale_scf_14	33.725	255	109	9	25	264	765351	764722	2.14e-28
Brhy	TRINITY_DN15534_c2_g3_i1|m.12096		Nuclear genome from Caulerpa lentillifera			Cale_scf_19	29.467	319	124	13	6	248	25303	26184	5.23e-22
Brhy	TRINITY_DN15534_c2_g3_i1|m.12096		Nuclear genome from Caulerpa lentillifera			Cale_scf_4	40	125	64	4	142	264	1022429	1022082	1.49e-19
Brhy	TRINITY_DN15534_c2_g3_i1|m.12096		Nuclear genome from Caulerpa lentillifera			Cale_scf_4	27.083	144	45	5	33	128	1022920	1022525	1.49e-19
Brhy	TRINITY_DN15534_c2_g3_i1|m.12096		Nuclear genome from Caulerpa lentillifera			Cale_scf_4	55.556	72	26	3	200	265	1221088	1221303	3.07e-15
Brhy	TRINITY_DN15534_c2_g3_i1|m.12096		Nuclear genome from Caulerpa lentillifera			Cale_scf_4	36.842	114	66	3	58	171	1220568	1220891	1.76e-14
Brhy	TRINITY_DN15534_c2_g3_i1|m.12096		Nuclear genome from Caulerpa lentillifera			Cale_scf_4	34.286	70	40	3	192	255	1220598	1220807	0.037
Brhy	TRINITY_DN15534_c2_g3_i1|m.12096		Nuclear genome from Caulerpa lentillifera			Cale_scf_34	55.556	72	26	3	200	265	207376	207591	3.97e-15
Brhy	TRINITY_DN15534_c2_g3_i1|m.12096		Nuclear genome from Caulerpa lentillifera			Cale_scf_34	36.066	122	72	3	50	171	206832	207179	9.43e-15
Brhy	TRINITY_DN15534_c2_g3_i1|m.12096		Nuclear genome from Caulerpa lentillifera			Cale_scf_34	34.286	70	40	3	192	255	206886	207095	0.037
Brhy	TRINITY_DN15534_c2_g3_i2|m.12100		Nuclear genome from Caulerpa lentillifera			Cale_scf_2	70.896	268	65	4	7	272	1132424	1131654	1.82e-119
Brhy	TRINITY_DN15534_c2_g3_i2|m.12100		Nuclear genome from Caulerpa lentillifera			Cale_scf_2	43.805	226	109	5	56	264	747660	748334	1.38e-51
Brhy	TRINITY_DN15534_c2_g3_i2|m.12100		Nuclear genome from Caulerpa lentillifera			Cale_scf_5	72.587	259	61	4	21	272	188643	189410	6.57e-119
Brhy	TRINITY_DN15534_c2_g3_i2|m.12100		Nuclear genome from Caulerpa lentillifera			Cale_scf_5	43.049	223	109	5	59	264	441837	441172	2.48e-44
Brhy	TRINITY_DN15534_c2_g3_i2|m.12100		Nuclear genome from Caulerpa lentillifera			Cale_scf_15	76.17	235	53	2	40	272	510212	509511	2.79e-117
Brhy	TRINITY_DN15534_c2_g3_i2|m.12100		Nuclear genome from Caulerpa lentillifera			Cale_scf_24	76.856	229	50	2	46	272	434406	435089	5.46e-115
Brhy	TRINITY_DN15534_c2_g3_i2|m.12100		Nuclear genome from Caulerpa lentillifera			Cale_scf_17	69.076	249	57	3	43	272	26038	25295	2.72e-110
Brhy	TRINITY_DN15534_c2_g3_i2|m.12100		Nuclear genome from Caulerpa lentillifera			Cale_scf_13	59.866	299	87	6	4	272	523249	524136	1.54e-104
Brhy	TRINITY_DN15534_c2_g3_i2|m.12100		Nuclear genome from Caulerpa lentillifera			Cale_scf_10	74.429	219	51	4	57	272	612707	613357	5.91e-102
Brhy	TRINITY_DN15534_c2_g3_i2|m.12100		Nuclear genome from Caulerpa lentillifera			Cale_scf_21	75	208	49	2	67	272	36914	36294	2.79e-100
Brhy	TRINITY_DN15534_c2_g3_i2|m.12100		Nuclear genome from Caulerpa lentillifera			Cale_scf_21	69.565	23	7	0	45	67	37033	36965	0.000326
Brhy	TRINITY_DN15534_c2_g3_i2|m.12100		Nuclear genome from Caulerpa lentillifera			Cale_scf_3	76.378	127	30	0	48	174	962786	963166	5.6e-62
Brhy	TRINITY_DN15534_c2_g3_i2|m.12100		Nuclear genome from Caulerpa lentillifera			Cale_scf_3	68.571	105	30	2	170	272	963324	963635	4.05e-39
Brhy	TRINITY_DN15534_c2_g3_i2|m.12100		Nuclear genome from Caulerpa lentillifera			Cale_scf_3	58.333	60	20	1	205	264	372441	372277	1.18e-15
Brhy	TRINITY_DN15534_c2_g3_i2|m.12100		Nuclear genome from Caulerpa lentillifera			Cale_scf_3	48.718	78	27	1	200	264	874663	874896	2.91e-15
Brhy	TRINITY_DN15534_c2_g3_i2|m.12100		Nuclear genome from Caulerpa lentillifera			Cale_scf_3	50	52	26	0	78	129	874247	874402	1.23e-09
Brhy	TRINITY_DN15534_c2_g3_i2|m.12100		Nuclear genome from Caulerpa lentillifera			Cale_scf_3	40.845	71	34	1	77	147	372848	372660	2.67e-06
Brhy	TRINITY_DN15534_c2_g3_i2|m.12100		Nuclear genome from Caulerpa lentillifera			Cale_scf_3	30.645	62	38	1	184	245	874229	874399	0.002
Brhy	TRINITY_DN15534_c2_g3_i2|m.12100		Nuclear genome from Caulerpa lentillifera			Cale_scf_3	34.043	47	31	0	88	134	963426	963566	0.68
Brhy	TRINITY_DN15534_c2_g3_i2|m.12100		Nuclear genome from Caulerpa lentillifera			Cale_scf_3	31.429	35	24	0	205	239	372815	372711	8.2
Brhy	TRINITY_DN15534_c2_g3_i2|m.12100		Nuclear genome from Caulerpa lentillifera			Cale_scf_26	75	128	32	0	47	174	222842	223225	1.51e-61
Brhy	TRINITY_DN15534_c2_g3_i2|m.12100		Nuclear genome from Caulerpa lentillifera			Cale_scf_26	70.707	99	26	2	176	272	223411	223704	4.41e-39
Brhy	TRINITY_DN15534_c2_g3_i2|m.12100		Nuclear genome from Caulerpa lentillifera			Cale_scf_26	34.043	47	31	0	88	134	223495	223635	0.68
Brhy	TRINITY_DN15534_c2_g3_i2|m.12100		Nuclear genome from Caulerpa lentillifera			Cale_scf_6	42.541	181	87	5	85	264	185563	185069	6.56e-34
Brhy	TRINITY_DN15534_c2_g3_i2|m.12100		Nuclear genome from Caulerpa lentillifera			Cale_scf_23	33.577	274	130	10	5	264	456540	457247	5.34e-29
Brhy	TRINITY_DN15534_c2_g3_i2|m.12100		Nuclear genome from Caulerpa lentillifera			Cale_scf_7	32.986	288	148	11	9	264	323648	324472	4.17e-28
Brhy	TRINITY_DN15534_c2_g3_i2|m.12100		Nuclear genome from Caulerpa lentillifera			Cale_scf_14	32.549	255	112	9	25	264	765351	764722	3.08e-26
Brhy	TRINITY_DN15534_c2_g3_i2|m.12100		Nuclear genome from Caulerpa lentillifera			Cale_scf_19	29.063	320	124	12	6	248	25303	26184	4.57e-22
Brhy	TRINITY_DN15534_c2_g3_i2|m.12100		Nuclear genome from Caulerpa lentillifera			Cale_scf_4	44.954	109	49	4	142	248	1022429	1022130	1.15e-19
Brhy	TRINITY_DN15534_c2_g3_i2|m.12100		Nuclear genome from Caulerpa lentillifera			Cale_scf_4	27.083	144	45	5	33	128	1022920	1022525	1.15e-19
Brhy	TRINITY_DN15534_c2_g3_i2|m.12100		Nuclear genome from Caulerpa lentillifera			Cale_scf_4	54.167	72	27	3	200	265	1221088	1221303	3.05e-15
Brhy	TRINITY_DN15534_c2_g3_i2|m.12100		Nuclear genome from Caulerpa lentillifera			Cale_scf_4	36.842	114	66	3	58	171	1220568	1220891	2.02e-14
Brhy	TRINITY_DN15534_c2_g3_i2|m.12100		Nuclear genome from Caulerpa lentillifera			Cale_scf_4	34.286	70	40	3	192	255	1220598	1220807	0.022
Brhy	TRINITY_DN15534_c2_g3_i2|m.12100		Nuclear genome from Caulerpa lentillifera			Cale_scf_34	54.167	72	27	3	200	265	207376	207591	4.53e-15
Brhy	TRINITY_DN15534_c2_g3_i2|m.12100		Nuclear genome from Caulerpa lentillifera			Cale_scf_34	36.066	122	72	3	50	171	206832	207179	1.27e-14
Brhy	TRINITY_DN15534_c2_g3_i2|m.12100		Nuclear genome from Caulerpa lentillifera			Cale_scf_34	34.286	70	40	3	192	255	206886	207095	0.022
Brhy	TRINITY_DN15534_c2_g3_i3|m.12102		Nuclear genome from Caulerpa lentillifera			Cale_scf_2	69.888	269	68	4	7	273	1132424	1131651	4.84e-120
Brhy	TRINITY_DN15534_c2_g3_i3|m.12102		Nuclear genome from Caulerpa lentillifera			Cale_scf_2	44.248	226	108	5	56	264	747660	748334	3.49e-51
Brhy	TRINITY_DN15534_c2_g3_i3|m.12102		Nuclear genome from Caulerpa lentillifera			Cale_scf_5	71.538	260	64	4	21	273	188643	189413	1.91e-119
Brhy	TRINITY_DN15534_c2_g3_i3|m.12102		Nuclear genome from Caulerpa lentillifera			Cale_scf_5	43.498	223	108	5	59	264	441837	441172	1.37e-43
Brhy	TRINITY_DN15534_c2_g3_i3|m.12102		Nuclear genome from Caulerpa lentillifera			Cale_scf_15	75	236	56	2	40	273	510212	509508	1.02e-117
Brhy	TRINITY_DN15534_c2_g3_i3|m.12102		Nuclear genome from Caulerpa lentillifera			Cale_scf_24	75.652	230	53	2	46	273	434406	435092	2.18e-115
Brhy	TRINITY_DN15534_c2_g3_i3|m.12102		Nuclear genome from Caulerpa lentillifera			Cale_scf_17	67.47	249	61	3	43	272	26038	25295	7.32e-109
Brhy	TRINITY_DN15534_c2_g3_i3|m.12102		Nuclear genome from Caulerpa lentillifera			Cale_scf_13	58.333	300	92	6	4	273	523249	524139	3.38e-103
Brhy	TRINITY_DN15534_c2_g3_i3|m.12102		Nuclear genome from Caulerpa lentillifera			Cale_scf_10	73.516	219	53	4	57	272	612707	613357	8.28e-102
Brhy	TRINITY_DN15534_c2_g3_i3|m.12102		Nuclear genome from Caulerpa lentillifera			Cale_scf_21	73.077	208	53	2	67	272	36914	36294	9.2e-99
Brhy	TRINITY_DN15534_c2_g3_i3|m.12102		Nuclear genome from Caulerpa lentillifera			Cale_scf_21	69.565	23	7	0	45	67	37033	36965	0.000315
Brhy	TRINITY_DN15534_c2_g3_i3|m.12102		Nuclear genome from Caulerpa lentillifera			Cale_scf_3	77.165	127	29	0	48	174	962786	963166	1.08e-62
Brhy	TRINITY_DN15534_c2_g3_i3|m.12102		Nuclear genome from Caulerpa lentillifera			Cale_scf_3	70.476	105	28	2	170	272	963324	963635	3.17e-40
Brhy	TRINITY_DN15534_c2_g3_i3|m.12102		Nuclear genome from Caulerpa lentillifera			Cale_scf_3	60	60	19	1	205	264	372441	372277	5.01e-16
Brhy	TRINITY_DN15534_c2_g3_i3|m.12102		Nuclear genome from Caulerpa lentillifera			Cale_scf_3	50	78	26	1	200	264	874663	874896	6.88e-16
Brhy	TRINITY_DN15534_c2_g3_i3|m.12102		Nuclear genome from Caulerpa lentillifera			Cale_scf_3	50	52	26	0	78	129	874247	874402	1.28e-09
Brhy	TRINITY_DN15534_c2_g3_i3|m.12102		Nuclear genome from Caulerpa lentillifera			Cale_scf_3	50	46	23	0	77	122	372848	372711	9.46e-06
Brhy	TRINITY_DN15534_c2_g3_i3|m.12102		Nuclear genome from Caulerpa lentillifera			Cale_scf_3	31.707	41	28	0	205	245	874277	874399	0.007
Brhy	TRINITY_DN15534_c2_g3_i3|m.12102		Nuclear genome from Caulerpa lentillifera			Cale_scf_3	34.043	47	31	0	88	134	963426	963566	0.31
Brhy	TRINITY_DN15534_c2_g3_i3|m.12102		Nuclear genome from Caulerpa lentillifera			Cale_scf_3	33.333	33	22	0	205	237	372815	372717	7.7
Brhy	TRINITY_DN15534_c2_g3_i3|m.12102		Nuclear genome from Caulerpa lentillifera			Cale_scf_26	75.781	128	31	0	47	174	222842	223225	3.49e-62
Brhy	TRINITY_DN15534_c2_g3_i3|m.12102		Nuclear genome from Caulerpa lentillifera			Cale_scf_26	72.727	99	24	2	176	272	223411	223704	4.02e-40
Brhy	TRINITY_DN15534_c2_g3_i3|m.12102		Nuclear genome from Caulerpa lentillifera			Cale_scf_26	34.043	47	31	0	88	134	223495	223635	0.31
Brhy	TRINITY_DN15534_c2_g3_i3|m.12102		Nuclear genome from Caulerpa lentillifera			Cale_scf_6	41.622	185	89	4	85	265	185563	185054	7.08e-35
Brhy	TRINITY_DN15534_c2_g3_i3|m.12102		Nuclear genome from Caulerpa lentillifera			Cale_scf_23	33.577	274	130	10	5	264	456540	457247	4.42e-29
Brhy	TRINITY_DN15534_c2_g3_i3|m.12102		Nuclear genome from Caulerpa lentillifera			Cale_scf_14	32.941	255	111	9	25	264	765351	764722	1.08e-26
Brhy	TRINITY_DN15534_c2_g3_i3|m.12102		Nuclear genome from Caulerpa lentillifera			Cale_scf_7	32.99	291	144	11	9	264	323648	324472	2.5e-26
Brhy	TRINITY_DN15534_c2_g3_i3|m.12102		Nuclear genome from Caulerpa lentillifera			Cale_scf_7	48.276	29	15	0	111	139	361859	361773	6.3
Brhy	TRINITY_DN15534_c2_g3_i3|m.12102		Nuclear genome from Caulerpa lentillifera			Cale_scf_19	30.408	319	121	13	6	248	25303	26184	6.99e-22
Brhy	TRINITY_DN15534_c2_g3_i3|m.12102		Nuclear genome from Caulerpa lentillifera			Cale_scf_4	46.789	109	47	4	142	248	1022429	1022130	2.43e-19
Brhy	TRINITY_DN15534_c2_g3_i3|m.12102		Nuclear genome from Caulerpa lentillifera			Cale_scf_4	26.241	141	50	5	33	128	1022920	1022525	2.43e-19
Brhy	TRINITY_DN15534_c2_g3_i3|m.12102		Nuclear genome from Caulerpa lentillifera			Cale_scf_4	56.25	64	26	2	200	261	1221088	1221279	2.78e-15
Brhy	TRINITY_DN15534_c2_g3_i3|m.12102		Nuclear genome from Caulerpa lentillifera			Cale_scf_4	36.842	114	66	3	58	171	1220568	1220891	1.76e-14
Brhy	TRINITY_DN15534_c2_g3_i3|m.12102		Nuclear genome from Caulerpa lentillifera			Cale_scf_4	35.714	70	39	3	192	255	1220598	1220807	0.003
Brhy	TRINITY_DN15534_c2_g3_i3|m.12102		Nuclear genome from Caulerpa lentillifera			Cale_scf_34	56.25	64	26	2	200	261	207376	207567	3.94e-15
Brhy	TRINITY_DN15534_c2_g3_i3|m.12102		Nuclear genome from Caulerpa lentillifera			Cale_scf_34	36.066	122	72	3	50	171	206832	207179	1.07e-14
Brhy	TRINITY_DN15534_c2_g3_i3|m.12102		Nuclear genome from Caulerpa lentillifera			Cale_scf_34	35.714	70	39	3	192	255	206886	207095	0.003
Brhy	TRINITY_DN15534_c2_g4_i1|m.12103		Nuclear genome from Caulerpa lentillifera			Cale_scf_5	73.801	271	61	4	19	281	188604	189410	4.57e-127
Brhy	TRINITY_DN15534_c2_g4_i1|m.12103		Nuclear genome from Caulerpa lentillifera			Cale_scf_5	43.946	223	106	5	69	273	441837	441172	7.57e-45
Brhy	TRINITY_DN15534_c2_g4_i1|m.12103		Nuclear genome from Caulerpa lentillifera			Cale_scf_2	76.587	252	50	2	39	281	1132409	1131654	6.8e-127
Brhy	TRINITY_DN15534_c2_g4_i1|m.12103		Nuclear genome from Caulerpa lentillifera			Cale_scf_2	44.69	226	106	5	66	273	747660	748334	1.04e-50
Brhy	TRINITY_DN15534_c2_g4_i1|m.12103		Nuclear genome from Caulerpa lentillifera			Cale_scf_15	79.149	235	47	1	49	281	510215	509511	1.45e-124
Brhy	TRINITY_DN15534_c2_g4_i1|m.12103		Nuclear genome from Caulerpa lentillifera			Cale_scf_24	81.498	227	40	1	57	281	434409	435089	1.93e-123
Brhy	TRINITY_DN15534_c2_g4_i1|m.12103		Nuclear genome from Caulerpa lentillifera			Cale_scf_17	73.279	247	47	2	54	281	26035	25295	1.1e-117
Brhy	TRINITY_DN15534_c2_g4_i1|m.12103		Nuclear genome from Caulerpa lentillifera			Cale_scf_21	80.193	207	39	1	77	281	36914	36294	1.95e-109
Brhy	TRINITY_DN15534_c2_g4_i1|m.12103		Nuclear genome from Caulerpa lentillifera			Cale_scf_21	68	25	8	0	53	77	37039	36965	0.000539
Brhy	TRINITY_DN15534_c2_g4_i1|m.12103		Nuclear genome from Caulerpa lentillifera			Cale_scf_13	68.595	242	60	3	55	281	523414	524136	1.02e-102
Brhy	TRINITY_DN15534_c2_g4_i1|m.12103		Nuclear genome from Caulerpa lentillifera			Cale_scf_10	65.613	253	83	3	32	281	612602	613357	4.61e-101
Brhy	TRINITY_DN15534_c2_g4_i1|m.12103		Nuclear genome from Caulerpa lentillifera			Cale_scf_3	63.354	161	53	1	25	185	962705	963169	1.9e-61
Brhy	TRINITY_DN15534_c2_g4_i1|m.12103		Nuclear genome from Caulerpa lentillifera			Cale_scf_3	70.707	99	27	1	185	281	963339	963635	1.14e-40
Brhy	TRINITY_DN15534_c2_g4_i1|m.12103		Nuclear genome from Caulerpa lentillifera			Cale_scf_3	37.013	154	55	7	150	273	874471	874896	8.28e-24
Brhy	TRINITY_DN15534_c2_g4_i1|m.12103		Nuclear genome from Caulerpa lentillifera			Cale_scf_3	48.077	52	27	0	88	139	874247	874402	8.28e-24
Brhy	TRINITY_DN15534_c2_g4_i1|m.12103		Nuclear genome from Caulerpa lentillifera			Cale_scf_3	56.667	60	21	1	214	273	372441	372277	3.31e-14
Brhy	TRINITY_DN15534_c2_g4_i1|m.12103		Nuclear genome from Caulerpa lentillifera			Cale_scf_3	35.593	59	33	2	197	254	874235	874399	0.000573
Brhy	TRINITY_DN15534_c2_g4_i1|m.12103		Nuclear genome from Caulerpa lentillifera			Cale_scf_3	41.818	55	29	1	94	148	372827	372672	0.001
Brhy	TRINITY_DN15534_c2_g4_i1|m.12103		Nuclear genome from Caulerpa lentillifera			Cale_scf_3	33.824	68	39	1	77	144	963381	963566	0.75
Brhy	TRINITY_DN15534_c2_g4_i1|m.12103		Nuclear genome from Caulerpa lentillifera			Cale_scf_3	33.333	33	22	0	214	246	372815	372717	8.9
Brhy	TRINITY_DN15534_c2_g4_i1|m.12103		Nuclear genome from Caulerpa lentillifera			Cale_scf_26	72.868	129	35	0	57	185	222842	223228	3.41e-60
Brhy	TRINITY_DN15534_c2_g4_i1|m.12103		Nuclear genome from Caulerpa lentillifera			Cale_scf_26	70.707	99	27	1	185	281	223408	223704	1.14e-40
Brhy	TRINITY_DN15534_c2_g4_i1|m.12103		Nuclear genome from Caulerpa lentillifera			Cale_scf_26	33.824	68	39	1	77	144	223450	223635	0.75
Brhy	TRINITY_DN15534_c2_g4_i1|m.12103		Nuclear genome from Caulerpa lentillifera			Cale_scf_6	41.209	182	87	5	95	273	185563	185069	1.69e-30
Brhy	TRINITY_DN15534_c2_g4_i1|m.12103		Nuclear genome from Caulerpa lentillifera			Cale_scf_6	31.707	41	28	0	209	249	185569	185447	0.37
Brhy	TRINITY_DN15534_c2_g4_i1|m.12103		Nuclear genome from Caulerpa lentillifera			Cale_scf_7	40.845	213	92	9	86	273	323861	324472	5.8e-29
Brhy	TRINITY_DN15534_c2_g4_i1|m.12103		Nuclear genome from Caulerpa lentillifera			Cale_scf_23	33.043	230	103	9	59	273	456666	457247	2.32e-22
Brhy	TRINITY_DN15534_c2_g4_i1|m.12103		Nuclear genome from Caulerpa lentillifera			Cale_scf_14	31.061	264	137	11	23	273	765417	764722	1.33e-21
Brhy	TRINITY_DN15534_c2_g4_i1|m.12103		Nuclear genome from Caulerpa lentillifera			Cale_scf_19	34.483	232	80	10	85	257	25528	26184	1.62e-19
Brhy	TRINITY_DN15534_c2_g4_i1|m.12103		Nuclear genome from Caulerpa lentillifera			Cale_scf_4	42.342	111	48	5	152	257	1022429	1022130	1.48e-17
Brhy	TRINITY_DN15534_c2_g4_i1|m.12103		Nuclear genome from Caulerpa lentillifera			Cale_scf_4	29.897	97	24	2	85	137	1022818	1022528	1.48e-17
Brhy	TRINITY_DN15534_c2_g4_i1|m.12103		Nuclear genome from Caulerpa lentillifera			Cale_scf_4	31.073	177	107	6	16	183	1220400	1220912	3.16e-14
Brhy	TRINITY_DN15534_c2_g4_i1|m.12103		Nuclear genome from Caulerpa lentillifera			Cale_scf_4	57.143	63	25	2	209	269	1221088	1221276	4.45e-14
Brhy	TRINITY_DN15534_c2_g4_i1|m.12103		Nuclear genome from Caulerpa lentillifera			Cale_scf_4	37.097	62	36	2	206	264	1220622	1220807	0.004
Brhy	TRINITY_DN15534_c2_g4_i1|m.12103		Nuclear genome from Caulerpa lentillifera			Cale_scf_34	31.073	177	107	6	16	183	206688	207200	8.49e-15
Brhy	TRINITY_DN15534_c2_g4_i1|m.12103		Nuclear genome from Caulerpa lentillifera			Cale_scf_34	57.143	63	25	2	209	269	207376	207564	6.48e-14
Brhy	TRINITY_DN15534_c2_g4_i1|m.12103		Nuclear genome from Caulerpa lentillifera			Cale_scf_34	37.097	62	36	2	206	264	206910	207095	0.004
Brhy	TRINITY_DN15534_c2_g4_i1|m.12103		Nuclear genome from Caulerpa lentillifera			Cale_scf_11	44.444	27	15	0	244	270	336121	336041	1.8
Brhy	TRINITY_DN15534_c2_g4_i1|m.12103		Nuclear genome from Caulerpa lentillifera			Cale_scf_116	34.211	38	25	0	173	210	948	835	9.1
Brhy	TRINITY_DN15534_c2_g4_i4|m.12104		Nuclear genome from Caulerpa lentillifera			Cale_scf_5	73.568	227	52	3	19	239	188604	189278	1.64e-105
Brhy	TRINITY_DN15534_c2_g4_i4|m.12104		Nuclear genome from Caulerpa lentillifera			Cale_scf_5	42.328	189	90	5	69	239	441837	441274	6.45e-32
Brhy	TRINITY_DN15534_c2_g4_i4|m.12104		Nuclear genome from Caulerpa lentillifera			Cale_scf_5	33.824	68	39	2	77	144	189156	189341	0.16
Brhy	TRINITY_DN15534_c2_g4_i4|m.12104		Nuclear genome from Caulerpa lentillifera			Cale_scf_2	76.923	208	41	1	39	239	1132409	1131786	6.09e-105
Brhy	TRINITY_DN15534_c2_g4_i4|m.12104		Nuclear genome from Caulerpa lentillifera			Cale_scf_2	43.229	192	90	5	66	239	747660	748232	4.85e-38
Brhy	TRINITY_DN15534_c2_g4_i4|m.12104		Nuclear genome from Caulerpa lentillifera			Cale_scf_2	33.824	68	39	2	77	144	1131908	1131723	0.25
Brhy	TRINITY_DN15534_c2_g4_i4|m.12104		Nuclear genome from Caulerpa lentillifera			Cale_scf_15	80.105	191	38	0	49	239	510215	509643	1.27e-102
Brhy	TRINITY_DN15534_c2_g4_i4|m.12104		Nuclear genome from Caulerpa lentillifera			Cale_scf_15	33.824	68	39	2	77	144	509765	509580	0.2
Brhy	TRINITY_DN15534_c2_g4_i4|m.12104		Nuclear genome from Caulerpa lentillifera			Cale_scf_24	83.06	183	31	0	57	239	434409	434957	1.6e-101
Brhy	TRINITY_DN15534_c2_g4_i4|m.12104		Nuclear genome from Caulerpa lentillifera			Cale_scf_24	33.824	68	39	2	77	144	434835	435020	0.24
Brhy	TRINITY_DN15534_c2_g4_i4|m.12104		Nuclear genome from Caulerpa lentillifera			Cale_scf_17	72.906	203	38	1	54	239	26035	25427	3.93e-96
Brhy	TRINITY_DN15534_c2_g4_i4|m.12104		Nuclear genome from Caulerpa lentillifera			Cale_scf_17	32.353	68	40	2	77	144	25549	25364	0.46
Brhy	TRINITY_DN15534_c2_g4_i4|m.12104		Nuclear genome from Caulerpa lentillifera			Cale_scf_21	81.595	163	30	0	77	239	36914	36426	9.71e-88
Brhy	TRINITY_DN15534_c2_g4_i4|m.12104		Nuclear genome from Caulerpa lentillifera			Cale_scf_21	68	25	8	0	53	77	37039	36965	0.000329
Brhy	TRINITY_DN15534_c2_g4_i4|m.12104		Nuclear genome from Caulerpa lentillifera			Cale_scf_21	33.824	68	39	2	77	144	36548	36363	0.24
Brhy	TRINITY_DN15534_c2_g4_i4|m.12104		Nuclear genome from Caulerpa lentillifera			Cale_scf_10	63.636	209	74	2	32	239	612602	613225	1.25e-79
Brhy	TRINITY_DN15534_c2_g4_i4|m.12104		Nuclear genome from Caulerpa lentillifera			Cale_scf_10	33.333	57	38	0	88	144	613118	613288	0.42
Brhy	TRINITY_DN15534_c2_g4_i4|m.12104		Nuclear genome from Caulerpa lentillifera			Cale_scf_10	26.364	110	69	4	78	187	754612	754905	4.8
Brhy	TRINITY_DN15534_c2_g4_i4|m.12104		Nuclear genome from Caulerpa lentillifera			Cale_scf_13	68.617	188	43	3	67	239	523450	524010	7.69e-79
Brhy	TRINITY_DN15534_c2_g4_i4|m.12104		Nuclear genome from Caulerpa lentillifera			Cale_scf_13	33.824	68	40	1	77	144	523885	524073	0.026
Brhy	TRINITY_DN15534_c2_g4_i4|m.12104		Nuclear genome from Caulerpa lentillifera			Cale_scf_3	63.354	161	53	1	25	185	962705	963169	1.35e-62
Brhy	TRINITY_DN15534_c2_g4_i4|m.12104		Nuclear genome from Caulerpa lentillifera			Cale_scf_3	76.364	55	13	0	185	239	963339	963503	4.99e-21
Brhy	TRINITY_DN15534_c2_g4_i4|m.12104		Nuclear genome from Caulerpa lentillifera			Cale_scf_3	48.077	52	27	0	88	139	874247	874402	1.9e-08
Brhy	TRINITY_DN15534_c2_g4_i4|m.12104		Nuclear genome from Caulerpa lentillifera			Cale_scf_3	41.818	55	29	1	94	148	372827	372672	0.000681
Brhy	TRINITY_DN15534_c2_g4_i4|m.12104		Nuclear genome from Caulerpa lentillifera			Cale_scf_3	38.636	44	22	2	197	239	874235	874354	0.42
Brhy	TRINITY_DN15534_c2_g4_i4|m.12104		Nuclear genome from Caulerpa lentillifera			Cale_scf_3	33.824	68	39	1	77	144	963381	963566	0.51
Brhy	TRINITY_DN15534_c2_g4_i4|m.12104		Nuclear genome from Caulerpa lentillifera			Cale_scf_3	53.846	26	7	1	214	239	372441	372379	0.84
Brhy	TRINITY_DN15534_c2_g4_i4|m.12104		Nuclear genome from Caulerpa lentillifera			Cale_scf_3	39.216	51	17	2	203	239	874642	874794	0.88
Brhy	TRINITY_DN15534_c2_g4_i4|m.12104		Nuclear genome from Caulerpa lentillifera			Cale_scf_26	72.868	129	35	0	57	185	222842	223228	3.36e-61
Brhy	TRINITY_DN15534_c2_g4_i4|m.12104		Nuclear genome from Caulerpa lentillifera			Cale_scf_26	76.364	55	13	0	185	239	223408	223572	4.99e-21
Brhy	TRINITY_DN15534_c2_g4_i4|m.12104		Nuclear genome from Caulerpa lentillifera			Cale_scf_26	33.824	68	39	1	77	144	223450	223635	0.51
Brhy	TRINITY_DN15534_c2_g4_i4|m.12104		Nuclear genome from Caulerpa lentillifera			Cale_scf_6	39.865	148	69	5	95	239	185563	185171	1.38e-20
Brhy	TRINITY_DN15534_c2_g4_i4|m.12104		Nuclear genome from Caulerpa lentillifera			Cale_scf_6	33.333	30	20	0	209	238	185569	185480	8.1
Brhy	TRINITY_DN15534_c2_g4_i4|m.12104		Nuclear genome from Caulerpa lentillifera			Cale_scf_7	36.872	179	79	8	86	239	323861	324370	1.02e-16
Brhy	TRINITY_DN15534_c2_g4_i4|m.12104		Nuclear genome from Caulerpa lentillifera			Cale_scf_34	31.638	177	106	6	16	183	206688	207200	1.28e-15
Brhy	TRINITY_DN15534_c2_g4_i4|m.12104		Nuclear genome from Caulerpa lentillifera			Cale_scf_34	60.606	33	11	2	209	239	207376	207474	0.004
Brhy	TRINITY_DN15534_c2_g4_i4|m.12104		Nuclear genome from Caulerpa lentillifera			Cale_scf_34	40	35	20	1	206	239	206910	207014	1.7
Brhy	TRINITY_DN15534_c2_g4_i4|m.12104		Nuclear genome from Caulerpa lentillifera			Cale_scf_4	31.638	177	106	6	16	183	1220400	1220912	4.7e-15
Brhy	TRINITY_DN15534_c2_g4_i4|m.12104		Nuclear genome from Caulerpa lentillifera			Cale_scf_4	41.304	92	40	5	152	239	1022429	1022184	4.39e-12
Brhy	TRINITY_DN15534_c2_g4_i4|m.12104		Nuclear genome from Caulerpa lentillifera			Cale_scf_4	29.897	97	24	2	85	137	1022818	1022528	4.39e-12
Brhy	TRINITY_DN15534_c2_g4_i4|m.12104		Nuclear genome from Caulerpa lentillifera			Cale_scf_4	57.576	33	12	2	209	239	1221088	1221186	0.009
Brhy	TRINITY_DN15534_c2_g4_i4|m.12104		Nuclear genome from Caulerpa lentillifera			Cale_scf_4	40	35	20	1	206	239	1220622	1220726	1.7
Brhy	TRINITY_DN15534_c2_g4_i4|m.12104		Nuclear genome from Caulerpa lentillifera			Cale_scf_19	32.71	214	72	10	85	239	25528	26130	2.21e-13
Brhy	TRINITY_DN15534_c2_g4_i4|m.12104		Nuclear genome from Caulerpa lentillifera			Cale_scf_23	29.442	197	88	8	58	239	456663	457145	1.33e-10
Brhy	TRINITY_DN15534_c2_g4_i4|m.12104		Nuclear genome from Caulerpa lentillifera			Cale_scf_14	31.667	180	85	9	72	239	765285	764824	3.88e-10
Brhy	TRINITY_DN15534_c2_g4_i4|m.12104		Nuclear genome from Caulerpa lentillifera			Cale_scf_35	23.404	47	36	0	176	222	112970	112830	7.3
Brhy	TRINITY_DN15534_c2_g4_i4|m.12104		Nuclear genome from Caulerpa lentillifera			Cale_scf_116	34.211	38	25	0	173	210	948	835	7.8
Brhy	TRINITY_DN15534_c2_g4_i5|m.12106		Nuclear genome from Caulerpa lentillifera			Cale_scf_2	76.303	211	44	1	7	211	1132418	1131786	9.52e-100
Brhy	TRINITY_DN15534_c2_g4_i5|m.12106		Nuclear genome from Caulerpa lentillifera			Cale_scf_2	43.229	192	90	5	38	211	747660	748232	4.01e-38
Brhy	TRINITY_DN15534_c2_g4_i5|m.12106		Nuclear genome from Caulerpa lentillifera			Cale_scf_2	33.824	68	39	2	49	116	1131908	1131723	0.24
Brhy	TRINITY_DN15534_c2_g4_i5|m.12106		Nuclear genome from Caulerpa lentillifera			Cale_scf_5	77.885	208	40	2	9	211	188658	189278	3.72e-98
Brhy	TRINITY_DN15534_c2_g4_i5|m.12106		Nuclear genome from Caulerpa lentillifera			Cale_scf_5	42.857	189	89	5	41	211	441837	441274	2.87e-32
Brhy	TRINITY_DN15534_c2_g4_i5|m.12106		Nuclear genome from Caulerpa lentillifera			Cale_scf_5	33.824	68	39	2	49	116	189156	189341	0.18
Brhy	TRINITY_DN15534_c2_g4_i5|m.12106		Nuclear genome from Caulerpa lentillifera			Cale_scf_15	83.908	174	28	0	38	211	510164	509643	8.72e-97
Brhy	TRINITY_DN15534_c2_g4_i5|m.12106		Nuclear genome from Caulerpa lentillifera			Cale_scf_15	33.824	68	39	2	49	116	509765	509580	0.2
Brhy	TRINITY_DN15534_c2_g4_i5|m.12106		Nuclear genome from Caulerpa lentillifera			Cale_scf_24	83.333	174	29	0	38	211	434436	434957	1.21e-95
Brhy	TRINITY_DN15534_c2_g4_i5|m.12106		Nuclear genome from Caulerpa lentillifera			Cale_scf_24	33.824	68	39	2	49	116	434835	435020	0.22
Brhy	TRINITY_DN15534_c2_g4_i5|m.12106		Nuclear genome from Caulerpa lentillifera			Cale_scf_17	73.822	191	33	1	38	211	25999	25427	7.82e-91
Brhy	TRINITY_DN15534_c2_g4_i5|m.12106		Nuclear genome from Caulerpa lentillifera			Cale_scf_17	32.353	68	40	2	49	116	25549	25364	0.43
Brhy	TRINITY_DN15534_c2_g4_i5|m.12106		Nuclear genome from Caulerpa lentillifera			Cale_scf_21	81.595	163	30	0	49	211	36914	36426	1.21e-87
Brhy	TRINITY_DN15534_c2_g4_i5|m.12106		Nuclear genome from Caulerpa lentillifera			Cale_scf_21	33.824	68	39	2	49	116	36548	36363	0.21
Brhy	TRINITY_DN15534_c2_g4_i5|m.12106		Nuclear genome from Caulerpa lentillifera			Cale_scf_21	83.333	12	2	0	38	49	37000	36965	8.4
Brhy	TRINITY_DN15534_c2_g4_i5|m.12106		Nuclear genome from Caulerpa lentillifera			Cale_scf_10	74.138	174	43	2	39	211	612707	613225	2.76e-79
Brhy	TRINITY_DN15534_c2_g4_i5|m.12106		Nuclear genome from Caulerpa lentillifera			Cale_scf_10	33.333	57	38	0	60	116	613118	613288	0.32
Brhy	TRINITY_DN15534_c2_g4_i5|m.12106		Nuclear genome from Caulerpa lentillifera			Cale_scf_10	26.364	110	69	4	50	159	754612	754905	3.2
Brhy	TRINITY_DN15534_c2_g4_i5|m.12106		Nuclear genome from Caulerpa lentillifera			Cale_scf_13	68.617	188	43	3	39	211	523450	524010	1.01e-78
Brhy	TRINITY_DN15534_c2_g4_i5|m.12106		Nuclear genome from Caulerpa lentillifera			Cale_scf_13	33.824	68	40	1	49	116	523885	524073	0.022
Brhy	TRINITY_DN15534_c2_g4_i5|m.12106		Nuclear genome from Caulerpa lentillifera			Cale_scf_3	74.167	120	31	0	38	157	962810	963169	8.44e-57
Brhy	TRINITY_DN15534_c2_g4_i5|m.12106		Nuclear genome from Caulerpa lentillifera			Cale_scf_3	76.364	55	13	0	157	211	963339	963503	5.07e-21
Brhy	TRINITY_DN15534_c2_g4_i5|m.12106		Nuclear genome from Caulerpa lentillifera			Cale_scf_3	48.077	52	27	0	60	111	874247	874402	1.37e-08
Brhy	TRINITY_DN15534_c2_g4_i5|m.12106		Nuclear genome from Caulerpa lentillifera			Cale_scf_3	38.71	62	35	1	59	120	372848	372672	0.000703
Brhy	TRINITY_DN15534_c2_g4_i5|m.12106		Nuclear genome from Caulerpa lentillifera			Cale_scf_3	38.636	44	22	2	169	211	874235	874354	0.41
Brhy	TRINITY_DN15534_c2_g4_i5|m.12106		Nuclear genome from Caulerpa lentillifera			Cale_scf_3	33.824	68	39	1	49	116	963381	963566	0.54
Brhy	TRINITY_DN15534_c2_g4_i5|m.12106		Nuclear genome from Caulerpa lentillifera			Cale_scf_3	53.846	26	7	1	186	211	372441	372379	0.85
Brhy	TRINITY_DN15534_c2_g4_i5|m.12106		Nuclear genome from Caulerpa lentillifera			Cale_scf_3	39.216	51	17	2	175	211	874642	874794	1.1
Brhy	TRINITY_DN15534_c2_g4_i5|m.12106		Nuclear genome from Caulerpa lentillifera			Cale_scf_26	67.407	135	41	1	38	169	222869	223273	2.54e-56
Brhy	TRINITY_DN15534_c2_g4_i5|m.12106		Nuclear genome from Caulerpa lentillifera			Cale_scf_26	76.364	55	13	0	157	211	223408	223572	5.07e-21
Brhy	TRINITY_DN15534_c2_g4_i5|m.12106		Nuclear genome from Caulerpa lentillifera			Cale_scf_26	33.824	68	39	1	49	116	223450	223635	0.54
Brhy	TRINITY_DN15534_c2_g4_i5|m.12106		Nuclear genome from Caulerpa lentillifera			Cale_scf_6	39.865	148	69	5	67	211	185563	185171	1.32e-20
Brhy	TRINITY_DN15534_c2_g4_i5|m.12106		Nuclear genome from Caulerpa lentillifera			Cale_scf_6	33.333	30	20	0	181	210	185569	185480	8
Brhy	TRINITY_DN15534_c2_g4_i5|m.12106		Nuclear genome from Caulerpa lentillifera			Cale_scf_7	36.872	179	79	8	58	211	323861	324370	6.84e-17
Brhy	TRINITY_DN15534_c2_g4_i5|m.12106		Nuclear genome from Caulerpa lentillifera			Cale_scf_34	37.19	121	65	4	40	155	206856	207200	1.02e-14
Brhy	TRINITY_DN15534_c2_g4_i5|m.12106		Nuclear genome from Caulerpa lentillifera			Cale_scf_34	60.606	33	11	2	181	211	207376	207474	0.003
Brhy	TRINITY_DN15534_c2_g4_i5|m.12106		Nuclear genome from Caulerpa lentillifera			Cale_scf_34	40	35	20	1	178	211	206910	207014	2.1
Brhy	TRINITY_DN15534_c2_g4_i5|m.12106		Nuclear genome from Caulerpa lentillifera			Cale_scf_4	37.19	121	65	4	40	155	1220568	1220912	1.38e-14
Brhy	TRINITY_DN15534_c2_g4_i5|m.12106		Nuclear genome from Caulerpa lentillifera			Cale_scf_4	41.304	92	40	5	124	211	1022429	1022184	4.61e-12
Brhy	TRINITY_DN15534_c2_g4_i5|m.12106		Nuclear genome from Caulerpa lentillifera			Cale_scf_4	29.897	97	24	2	57	109	1022818	1022528	4.61e-12
Brhy	TRINITY_DN15534_c2_g4_i5|m.12106		Nuclear genome from Caulerpa lentillifera			Cale_scf_4	57.576	33	12	2	181	211	1221088	1221186	0.008
Brhy	TRINITY_DN15534_c2_g4_i5|m.12106		Nuclear genome from Caulerpa lentillifera			Cale_scf_4	40	35	20	1	178	211	1220622	1220726	2.1
Brhy	TRINITY_DN15534_c2_g4_i5|m.12106		Nuclear genome from Caulerpa lentillifera			Cale_scf_19	32.71	214	72	10	57	211	25528	26130	1.62e-13
Brhy	TRINITY_DN15534_c2_g4_i5|m.12106		Nuclear genome from Caulerpa lentillifera			Cale_scf_23	30.601	183	82	8	44	211	456687	457145	3.62e-10
Brhy	TRINITY_DN15534_c2_g4_i5|m.12106		Nuclear genome from Caulerpa lentillifera			Cale_scf_14	31.492	181	86	9	43	211	765288	764824	7.66e-10
Brhy	TRINITY_DN15534_c2_g4_i5|m.12106		Nuclear genome from Caulerpa lentillifera			Cale_scf_116	34.211	38	25	0	145	182	948	835	6.7
Brhy	TRINITY_DN15534_c2_g4_i5|m.12106		Nuclear genome from Caulerpa lentillifera			Cale_scf_35	23.404	47	36	0	148	194	112970	112830	6.9
Brhy	TRINITY_DN15534_c2_g5_i1|m.12108		Nuclear genome from Caulerpa lentillifera			Cale_scf_13	69.758	248	59	3	50	282	523396	524136	2.22e-110
Brhy	TRINITY_DN15534_c2_g5_i1|m.12108		Nuclear genome from Caulerpa lentillifera			Cale_scf_10	65.693	274	85	4	18	282	612536	613357	2.22e-110
Brhy	TRINITY_DN15534_c2_g5_i1|m.12108		Nuclear genome from Caulerpa lentillifera			Cale_scf_5	71.101	218	58	3	69	282	188760	189410	5.23e-101
Brhy	TRINITY_DN15534_c2_g5_i1|m.12108		Nuclear genome from Caulerpa lentillifera			Cale_scf_5	43.946	223	97	9	71	270	441837	441184	9.3e-40
Brhy	TRINITY_DN15534_c2_g5_i1|m.12108		Nuclear genome from Caulerpa lentillifera			Cale_scf_15	57.692	286	115	4	1	282	510362	509511	7.05e-101
Brhy	TRINITY_DN15534_c2_g5_i1|m.12108		Nuclear genome from Caulerpa lentillifera			Cale_scf_2	71.101	218	58	3	69	282	1132304	1131654	1.06e-100
Brhy	TRINITY_DN15534_c2_g5_i1|m.12108		Nuclear genome from Caulerpa lentillifera			Cale_scf_2	45.536	224	96	8	69	270	747663	748322	9.68e-47
Brhy	TRINITY_DN15534_c2_g5_i1|m.12108		Nuclear genome from Caulerpa lentillifera			Cale_scf_24	71.56	218	57	3	69	282	434439	435089	2.08e-100
Brhy	TRINITY_DN15534_c2_g5_i1|m.12108		Nuclear genome from Caulerpa lentillifera			Cale_scf_17	64.681	235	61	3	69	282	25996	25295	1e-94
Brhy	TRINITY_DN15534_c2_g5_i1|m.12108		Nuclear genome from Caulerpa lentillifera			Cale_scf_21	70.673	208	56	3	79	282	36914	36294	1.97e-92
Brhy	TRINITY_DN15534_c2_g5_i1|m.12108		Nuclear genome from Caulerpa lentillifera			Cale_scf_3	67.227	119	37	1	69	185	962813	963169	4.18e-49
Brhy	TRINITY_DN15534_c2_g5_i1|m.12108		Nuclear genome from Caulerpa lentillifera			Cale_scf_3	72.277	101	25	2	185	283	963339	963638	3.87e-41
Brhy	TRINITY_DN15534_c2_g5_i1|m.12108		Nuclear genome from Caulerpa lentillifera			Cale_scf_3	50.649	77	24	2	207	270	874657	874884	1.61e-14
Brhy	TRINITY_DN15534_c2_g5_i1|m.12108		Nuclear genome from Caulerpa lentillifera			Cale_scf_3	48.571	70	31	1	215	284	372441	372247	2.76e-13
Brhy	TRINITY_DN15534_c2_g5_i1|m.12108		Nuclear genome from Caulerpa lentillifera			Cale_scf_3	39.506	81	34	2	73	139	874163	874402	2.52e-09
Brhy	TRINITY_DN15534_c2_g5_i1|m.12108		Nuclear genome from Caulerpa lentillifera			Cale_scf_3	43.137	51	29	0	87	137	372848	372696	3.32e-06
Brhy	TRINITY_DN15534_c2_g5_i1|m.12108		Nuclear genome from Caulerpa lentillifera			Cale_scf_3	38	50	31	0	201	250	874235	874384	0.002
Brhy	TRINITY_DN15534_c2_g5_i1|m.12108		Nuclear genome from Caulerpa lentillifera			Cale_scf_3	42.424	33	19	0	98	130	963426	963524	0.05
Brhy	TRINITY_DN15534_c2_g5_i1|m.12108		Nuclear genome from Caulerpa lentillifera			Cale_scf_3	43.182	44	23	2	211	252	372830	372699	0.28
Brhy	TRINITY_DN15534_c2_g5_i1|m.12108		Nuclear genome from Caulerpa lentillifera			Cale_scf_3	32.5	40	27	0	208	247	962885	963004	5.2
Brhy	TRINITY_DN15534_c2_g5_i1|m.12108		Nuclear genome from Caulerpa lentillifera			Cale_scf_26	67.227	119	37	1	69	185	222872	223228	6.07e-49
Brhy	TRINITY_DN15534_c2_g5_i1|m.12108		Nuclear genome from Caulerpa lentillifera			Cale_scf_26	72.115	104	26	2	186	287	223411	223719	2.26e-41
Brhy	TRINITY_DN15534_c2_g5_i1|m.12108		Nuclear genome from Caulerpa lentillifera			Cale_scf_26	42.424	33	19	0	98	130	223495	223593	0.05
Brhy	TRINITY_DN15534_c2_g5_i1|m.12108		Nuclear genome from Caulerpa lentillifera			Cale_scf_26	27.778	54	39	0	208	261	222944	223105	3.5
Brhy	TRINITY_DN15534_c2_g5_i1|m.12108		Nuclear genome from Caulerpa lentillifera			Cale_scf_6	41.111	180	91	4	95	274	185563	185069	1.38e-32
Brhy	TRINITY_DN15534_c2_g5_i1|m.12108		Nuclear genome from Caulerpa lentillifera			Cale_scf_7	33.216	283	148	8	16	270	323651	324460	3.02e-29
Brhy	TRINITY_DN15534_c2_g5_i1|m.12108		Nuclear genome from Caulerpa lentillifera			Cale_scf_23	35.922	206	100	8	74	270	456687	457235	3.8e-22
Brhy	TRINITY_DN15534_c2_g5_i1|m.12108		Nuclear genome from Caulerpa lentillifera			Cale_scf_14	32.727	220	91	7	73	270	765288	764734	2.62e-21
Brhy	TRINITY_DN15534_c2_g5_i1|m.12108		Nuclear genome from Caulerpa lentillifera			Cale_scf_34	61.194	67	25	1	209	274	207376	207576	1.47e-19
Brhy	TRINITY_DN15534_c2_g5_i1|m.12108		Nuclear genome from Caulerpa lentillifera			Cale_scf_34	35.156	128	70	5	55	181	206832	207179	6.61e-12
Brhy	TRINITY_DN15534_c2_g5_i1|m.12108		Nuclear genome from Caulerpa lentillifera			Cale_scf_34	38.095	63	37	1	205	265	206907	207095	0.003
Brhy	TRINITY_DN15534_c2_g5_i1|m.12108		Nuclear genome from Caulerpa lentillifera			Cale_scf_4	61.194	67	25	1	209	274	1221088	1221288	1.63e-19
Brhy	TRINITY_DN15534_c2_g5_i1|m.12108		Nuclear genome from Caulerpa lentillifera			Cale_scf_4	36.607	112	67	4	70	181	1220568	1220891	1.76e-11
Brhy	TRINITY_DN15534_c2_g5_i1|m.12108		Nuclear genome from Caulerpa lentillifera			Cale_scf_4	47.126	87	35	4	176	258	1022369	1022130	2.07e-09
Brhy	TRINITY_DN15534_c2_g5_i1|m.12108		Nuclear genome from Caulerpa lentillifera			Cale_scf_4	25.301	166	62	5	17	137	1022974	1022528	0.00069
Brhy	TRINITY_DN15534_c2_g5_i1|m.12108		Nuclear genome from Caulerpa lentillifera			Cale_scf_4	38.095	63	37	1	205	265	1220619	1220807	0.003
Brhy	TRINITY_DN15534_c2_g5_i1|m.12108		Nuclear genome from Caulerpa lentillifera			Cale_scf_4	48.148	27	14	0	104	130	1022243	1022163	0.29
Brhy	TRINITY_DN15534_c2_g5_i1|m.12108		Nuclear genome from Caulerpa lentillifera			Cale_scf_19	29.63	297	128	13	17	258	25372	26184	6.82e-15
Brhy	TRINITY_DN15534_c5_g1_i1|m.12109		Nuclear genome from Caulerpa lentillifera			Cale_scf_5	87.879	33	4	0	115	147	188754	188852	4.75e-14
Brhy	TRINITY_DN15534_c5_g1_i1|m.12109		Nuclear genome from Caulerpa lentillifera			Cale_scf_5	48.387	31	14	1	119	147	441837	441745	7.3
Brhy	TRINITY_DN15534_c5_g1_i1|m.12109		Nuclear genome from Caulerpa lentillifera			Cale_scf_15	87.879	33	4	0	115	147	510167	510069	6.04e-14
Brhy	TRINITY_DN15534_c5_g1_i1|m.12109		Nuclear genome from Caulerpa lentillifera			Cale_scf_2	87.879	33	4	0	115	147	1132310	1132212	6.85e-14
Brhy	TRINITY_DN15534_c5_g1_i1|m.12109		Nuclear genome from Caulerpa lentillifera			Cale_scf_2	55.882	34	13	1	116	147	747660	747761	0.006
Brhy	TRINITY_DN15534_c5_g1_i1|m.12109		Nuclear genome from Caulerpa lentillifera			Cale_scf_24	84.848	33	5	0	115	147	434433	434531	2.38e-13
Brhy	TRINITY_DN15534_c5_g1_i1|m.12109		Nuclear genome from Caulerpa lentillifera			Cale_scf_3	78.788	33	7	0	115	147	962807	962905	5.3e-12
Brhy	TRINITY_DN15534_c5_g1_i1|m.12109		Nuclear genome from Caulerpa lentillifera			Cale_scf_26	78.788	33	7	0	115	147	222866	222964	8.02e-12
Brhy	TRINITY_DN15534_c5_g1_i1|m.12109		Nuclear genome from Caulerpa lentillifera			Cale_scf_17	50	50	8	1	115	147	26002	25853	2.7e-08
Brhy	TRINITY_DN15534_c5_g1_i1|m.12109		Nuclear genome from Caulerpa lentillifera			Cale_scf_13	70.968	31	8	1	117	147	523450	523539	3.89e-08
Brhy	TRINITY_DN15534_c5_g1_i1|m.12109		Nuclear genome from Caulerpa lentillifera			Cale_scf_21	76.19	21	5	0	127	147	36914	36852	8.29e-07
Brhy	TRINITY_DN15534_c5_g1_i1|m.12109		Nuclear genome from Caulerpa lentillifera			Cale_scf_21	76.923	13	3	0	115	127	37003	36965	8.29e-07
Brhy	TRINITY_DN15534_c5_g1_i1|m.12109		Nuclear genome from Caulerpa lentillifera			Cale_scf_10	67.742	31	9	1	117	147	612707	612796	2e-05
Brhy	TRINITY_DN15534_c5_g1_i1|m.12109		Nuclear genome from Caulerpa lentillifera			Cale_scf_14	44.444	27	12	1	121	147	765288	765217	5.9
Brhy	TRINITY_DN15534_c5_g1_i1|m.12109		Nuclear genome from Caulerpa lentillifera			Cale_scf_23	50	26	10	1	122	147	456687	456755	7.2
Brhy	TRINITY_DN15534_c6_g1_i1|m.12112		Nuclear genome from Caulerpa lentillifera			Cale_scf_17	76.316	114	10	1	20	116	26032	25691	4.95e-54
Brhy	TRINITY_DN15534_c6_g1_i1|m.12112		Nuclear genome from Caulerpa lentillifera			Cale_scf_17	37.037	54	28	2	42	95	25549	25406	0.012
Brhy	TRINITY_DN15534_c6_g1_i1|m.12112		Nuclear genome from Caulerpa lentillifera			Cale_scf_5	70.339	118	33	1	1	116	188661	189014	7.15e-54
Brhy	TRINITY_DN15534_c6_g1_i1|m.12112		Nuclear genome from Caulerpa lentillifera			Cale_scf_5	44.706	85	44	2	34	116	441837	441586	8.98e-16
Brhy	TRINITY_DN15534_c6_g1_i1|m.12112		Nuclear genome from Caulerpa lentillifera			Cale_scf_5	30.38	79	45	3	17	95	189093	189299	0.018
Brhy	TRINITY_DN15534_c6_g1_i1|m.12112		Nuclear genome from Caulerpa lentillifera			Cale_scf_2	68.644	118	34	1	2	116	1132403	1132050	2.74e-52
Brhy	TRINITY_DN15534_c6_g1_i1|m.12112		Nuclear genome from Caulerpa lentillifera			Cale_scf_2	48.864	88	42	2	31	116	747660	747920	6.8e-20
Brhy	TRINITY_DN15534_c6_g1_i1|m.12112		Nuclear genome from Caulerpa lentillifera			Cale_scf_2	30.38	79	45	3	17	95	1131971	1131765	0.029
Brhy	TRINITY_DN15534_c6_g1_i1|m.12112		Nuclear genome from Caulerpa lentillifera			Cale_scf_24	60	135	35	1	1	116	434289	434693	7.55e-51
Brhy	TRINITY_DN15534_c6_g1_i1|m.12112		Nuclear genome from Caulerpa lentillifera			Cale_scf_24	30.38	79	45	3	17	95	434772	434978	0.018
Brhy	TRINITY_DN15534_c6_g1_i1|m.12112		Nuclear genome from Caulerpa lentillifera			Cale_scf_15	75.51	98	24	0	19	116	510200	509907	7.37e-50
Brhy	TRINITY_DN15534_c6_g1_i1|m.12112		Nuclear genome from Caulerpa lentillifera			Cale_scf_15	30.38	79	45	3	17	95	509828	509622	0.024
Brhy	TRINITY_DN15534_c6_g1_i1|m.12112		Nuclear genome from Caulerpa lentillifera			Cale_scf_26	76.842	95	22	0	22	116	222842	223126	7.27e-49
Brhy	TRINITY_DN15534_c6_g1_i1|m.12112		Nuclear genome from Caulerpa lentillifera			Cale_scf_26	37.209	43	26	1	53	95	223468	223593	0.29
Brhy	TRINITY_DN15534_c6_g1_i1|m.12112		Nuclear genome from Caulerpa lentillifera			Cale_scf_3	76.596	94	22	0	23	116	962786	963067	2.13e-48
Brhy	TRINITY_DN15534_c6_g1_i1|m.12112		Nuclear genome from Caulerpa lentillifera			Cale_scf_3	48.98	49	25	0	53	101	874247	874393	1.64e-09
Brhy	TRINITY_DN15534_c6_g1_i1|m.12112		Nuclear genome from Caulerpa lentillifera			Cale_scf_3	37.255	51	32	0	52	102	372848	372696	0.000264
Brhy	TRINITY_DN15534_c6_g1_i1|m.12112		Nuclear genome from Caulerpa lentillifera			Cale_scf_3	37.209	43	26	1	53	95	963399	963524	0.29
Brhy	TRINITY_DN15534_c6_g1_i1|m.12112		Nuclear genome from Caulerpa lentillifera			Cale_scf_3	41.667	24	14	0	58	81	255746	255675	5.5
Brhy	TRINITY_DN15534_c6_g1_i1|m.12112		Nuclear genome from Caulerpa lentillifera			Cale_scf_21	92	75	6	0	42	116	36914	36690	6.65e-46
Brhy	TRINITY_DN15534_c6_g1_i1|m.12112		Nuclear genome from Caulerpa lentillifera			Cale_scf_21	70.37	27	8	0	16	42	37045	36965	6.65e-46
Brhy	TRINITY_DN15534_c6_g1_i1|m.12112		Nuclear genome from Caulerpa lentillifera			Cale_scf_21	29.114	79	46	3	17	95	36611	36405	0.049
Brhy	TRINITY_DN15534_c6_g1_i1|m.12112		Nuclear genome from Caulerpa lentillifera			Cale_scf_13	74.118	85	21	1	32	116	523450	523701	1.97e-40
Brhy	TRINITY_DN15534_c6_g1_i1|m.12112		Nuclear genome from Caulerpa lentillifera			Cale_scf_13	35.088	57	32	1	42	98	523885	524040	0.002
Brhy	TRINITY_DN15534_c6_g1_i1|m.12112		Nuclear genome from Caulerpa lentillifera			Cale_scf_13	37.037	27	17	0	65	91	193025	192945	5.5
Brhy	TRINITY_DN15534_c6_g1_i1|m.12112		Nuclear genome from Caulerpa lentillifera			Cale_scf_10	71.765	85	23	1	32	116	612707	612958	9.71e-38
Brhy	TRINITY_DN15534_c6_g1_i1|m.12112		Nuclear genome from Caulerpa lentillifera			Cale_scf_10	37.209	43	27	0	53	95	613118	613246	0.046
Brhy	TRINITY_DN15534_c6_g1_i1|m.12112		Nuclear genome from Caulerpa lentillifera			Cale_scf_34	42.5	80	43	1	25	104	206832	207062	6.62e-13
Brhy	TRINITY_DN15534_c6_g1_i1|m.12112		Nuclear genome from Caulerpa lentillifera			Cale_scf_4	42.5	80	43	1	25	104	1220544	1220774	1.47e-12
Brhy	TRINITY_DN15534_c6_g1_i1|m.12112		Nuclear genome from Caulerpa lentillifera			Cale_scf_4	28.44	109	31	2	38	102	1022845	1022528	6.75e-05
Brhy	TRINITY_DN15534_c6_g1_i1|m.12112		Nuclear genome from Caulerpa lentillifera			Cale_scf_4	37.5	40	23	2	57	95	1022279	1022163	1.3
Brhy	TRINITY_DN15534_c6_g1_i1|m.12112		Nuclear genome from Caulerpa lentillifera			Cale_scf_23	39.535	86	43	2	17	102	456645	456875	8.01e-11
Brhy	TRINITY_DN15534_c6_g1_i1|m.12112		Nuclear genome from Caulerpa lentillifera			Cale_scf_14	41.791	67	36	1	36	102	765288	765097	5.05e-09
Brhy	TRINITY_DN15534_c6_g1_i1|m.12112		Nuclear genome from Caulerpa lentillifera			Cale_scf_7	41.096	73	37	2	36	102	323816	324034	1.89e-08
Brhy	TRINITY_DN15534_c6_g1_i1|m.12112		Nuclear genome from Caulerpa lentillifera			Cale_scf_6	51.163	43	21	0	60	102	185563	185435	2.86e-08
Brhy	TRINITY_DN15534_c6_g1_i1|m.12112		Nuclear genome from Caulerpa lentillifera			Cale_scf_19	28.44	109	31	3	38	102	25501	25818	0.000171
Brhy	TRINITY_DN15534_c6_g1_i1|m.12112		Nuclear genome from Caulerpa lentillifera			Cale_scf_19	40	40	22	2	57	95	26035	26151	0.47
Brhy	TRINITY_DN15534_c6_g1_i1|m.12112		Nuclear genome from Caulerpa lentillifera			Cale_scf_47	40.741	27	16	0	45	71	23268	23188	2.8
Brhy	TRINITY_DN15663_c0_g1_i1|m.49965		Nuclear genome from Caulerpa lentillifera			Cale_scf_29	23.487	413	256	13	108	495	401416	402549	1.22e-07
Brhy	TRINITY_DN15663_c0_g1_i1|m.49965		Nuclear genome from Caulerpa lentillifera			Cale_scf_29	41.935	31	18	0	651	681	401536	401628	6.8
Brhy	TRINITY_DN15663_c0_g1_i1|m.49965		Nuclear genome from Caulerpa lentillifera			Cale_scf_20	25.294	170	104	4	109	258	718320	717820	0.2
Brhy	TRINITY_DN15663_c0_g1_i1|m.49965		Nuclear genome from Caulerpa lentillifera			Cale_scf_13	34.375	32	21	0	514	545	339524	339619	9.4
Brhy	TRINITY_DN15786_c0_g1_i1|m.25788		Nuclear genome from Caulerpa lentillifera			Cale_scf_3	72.05	483	121	1	364	832	947746	946298	0
Brhy	TRINITY_DN15786_c0_g1_i1|m.25788		Nuclear genome from Caulerpa lentillifera			Cale_scf_3	70.807	161	47	0	831	991	946253	945771	0
Brhy	TRINITY_DN15786_c0_g1_i1|m.25788		Nuclear genome from Caulerpa lentillifera			Cale_scf_3	42.347	196	65	5	160	307	948602	948015	0
Brhy	TRINITY_DN15786_c0_g1_i1|m.25788		Nuclear genome from Caulerpa lentillifera			Cale_scf_3	75.862	58	14	0	306	363	947964	947791	0
Brhy	TRINITY_DN15786_c0_g1_i1|m.25788		Nuclear genome from Caulerpa lentillifera			Cale_scf_3	49.112	169	40	4	137	259	948711	948205	3.16e-46
Brhy	TRINITY_DN15786_c0_g1_i1|m.25788		Nuclear genome from Caulerpa lentillifera			Cale_scf_3	61.224	49	19	0	89	137	948898	948752	3.16e-46
Brhy	TRINITY_DN15786_c0_g1_i1|m.25788		Nuclear genome from Caulerpa lentillifera			Cale_scf_5	48.235	255	113	3	88	323	58964	58200	7.78e-62
Brhy	TRINITY_DN15786_c0_g1_i1|m.25788		Nuclear genome from Caulerpa lentillifera			Cale_scf_5	31.068	206	78	5	375	517	57555	56941	3.44e-27
Brhy	TRINITY_DN15786_c0_g1_i1|m.25788		Nuclear genome from Caulerpa lentillifera			Cale_scf_5	68.085	47	15	0	523	569	56824	56684	3.44e-27
Brhy	TRINITY_DN15786_c0_g1_i1|m.25788		Nuclear genome from Caulerpa lentillifera			Cale_scf_5	60.87	23	9	0	692	714	56020	55952	0.000391
Brhy	TRINITY_DN15786_c0_g1_i1|m.25788		Nuclear genome from Caulerpa lentillifera			Cale_scf_5	21.32	197	88	6	711	848	55916	55350	0.000391
Brhy	TRINITY_DN15786_c0_g1_i1|m.25788		Nuclear genome from Caulerpa lentillifera			Cale_scf_16	42.857	35	20	0	461	495	172851	172955	0.91
Brhy	TRINITY_DN15786_c0_g1_i1|m.25788		Nuclear genome from Caulerpa lentillifera			Cale_scf_23	38	50	20	2	938	976	236669	236818	0.99
Brhy	TRINITY_DN16093_c0_g1_i1|m.54248		Nuclear genome from Caulerpa lentillifera			Cale_scf_22	74.406	379	95	1	60	436	723608	724744	0
Brhy	TRINITY_DN16093_c0_g1_i1|m.54248		Nuclear genome from Caulerpa lentillifera			Cale_scf_8	28.846	52	36	1	248	299	631778	631626	3.7
Brhy	TRINITY_DN16109_c0_g1_i1|m.33463		Nuclear genome from Caulerpa lentillifera			Cale_scf_14	68.916	415	120	4	4	409	560568	561812	0
Brhy	TRINITY_DN16109_c0_g1_i1|m.33463		Nuclear genome from Caulerpa lentillifera			Cale_scf_23	79.464	336	69	0	76	411	318917	319924	0
Brhy	TRINITY_DN16109_c0_g1_i1|m.33463		Nuclear genome from Caulerpa lentillifera			Cale_scf_24	40.909	88	50	2	312	398	381162	380902	1.87e-12
Brhy	TRINITY_DN16109_c0_g1_i1|m.33463		Nuclear genome from Caulerpa lentillifera			Cale_scf_24	57.692	26	11	0	180	205	381541	381464	0.02
Brhy	TRINITY_DN16109_c0_g1_i1|m.33463		Nuclear genome from Caulerpa lentillifera			Cale_scf_22	23.558	208	111	9	178	366	529188	529724	3.6e-06
Brhy	TRINITY_DN16109_c0_g1_i1|m.33463		Nuclear genome from Caulerpa lentillifera			Cale_scf_18	36.207	58	35	1	324	379	774026	774199	1.5
Brhy	TRINITY_DN16109_c0_g1_i1|m.33463		Nuclear genome from Caulerpa lentillifera			Cale_scf_37	28.986	69	44	2	127	195	28190	27999	6.1
Brhy	TRINITY_DN16114_c0_g1_i1|m.33466		Nuclear genome from Caulerpa lentillifera			Cale_scf_22	78.075	187	26	1	157	328	529170	529730	7.15e-138
Brhy	TRINITY_DN16114_c0_g1_i1|m.33466		Nuclear genome from Caulerpa lentillifera			Cale_scf_22	68.317	101	32	0	61	161	528836	529138	7.15e-138
Brhy	TRINITY_DN16114_c0_g1_i1|m.33466		Nuclear genome from Caulerpa lentillifera			Cale_scf_22	75	48	12	0	326	373	529775	529918	7.15e-138
Brhy	TRINITY_DN16114_c0_g1_i1|m.33466		Nuclear genome from Caulerpa lentillifera			Cale_scf_24	38.732	142	83	3	226	367	381297	380884	1.32e-23
Brhy	TRINITY_DN16114_c0_g1_i1|m.33466		Nuclear genome from Caulerpa lentillifera			Cale_scf_24	34.911	169	71	4	104	240	381814	381329	9.53e-21
Brhy	TRINITY_DN16114_c0_g1_i1|m.33466		Nuclear genome from Caulerpa lentillifera			Cale_scf_23	29.799	349	199	16	62	370	318887	319915	5.66e-21
Brhy	TRINITY_DN16114_c0_g1_i1|m.33466		Nuclear genome from Caulerpa lentillifera			Cale_scf_14	27.954	347	206	13	63	370	560784	561809	4.22e-20
Brhy	TRINITY_DN16114_c0_g1_i1|m.33466		Nuclear genome from Caulerpa lentillifera			Cale_scf_33	20	90	64	1	291	372	114585	114316	7.3
Brhy	TRINITY_DN16153_c0_g1_i1|m.33391		Nuclear genome from Caulerpa lentillifera			Cale_scf_17	70.093	107	32	0	28	134	82349	82669	4e-48
Brhy	TRINITY_DN16153_c0_g1_i1|m.33391		Nuclear genome from Caulerpa lentillifera			Cale_scf_12	31.481	108	55	4	20	124	783529	783254	0.000147
Brhy	TRINITY_DN16153_c0_g1_i1|m.33391		Nuclear genome from Caulerpa lentillifera			Cale_scf_5	58.333	24	10	0	17	40	188688	188759	0.58
Brhy	TRINITY_DN16153_c0_g1_i1|m.33391		Nuclear genome from Caulerpa lentillifera			Cale_scf_16	48.148	27	14	0	85	111	237409	237489	3.8
Brhy	TRINITY_DN16153_c0_g1_i1|m.33391		Nuclear genome from Caulerpa lentillifera			Cale_scf_2	50	38	15	2	4	40	1132409	1132305	4.5
Brhy	TRINITY_DN16153_c0_g1_i1|m.33391		Nuclear genome from Caulerpa lentillifera			Cale_scf_9	31.667	60	39	2	33	91	707966	708142	5
Brhy	TRINITY_DN16153_c0_g1_i1|m.33391		Nuclear genome from Caulerpa lentillifera			Cale_scf_4	66.667	15	5	0	111	125	1128308	1128352	6.8
Brhy	TRINITY_DN16153_c0_g1_i1|m.33391		Nuclear genome from Caulerpa lentillifera			Cale_scf_34	31.25	48	21	1	77	124	138168	138275	7.8
Brhy	TRINITY_DN16170_c0_g1_i1|m.33317		Nuclear genome from Caulerpa lentillifera			Cale_scf_14	41.743	218	111	6	34	248	765300	764686	2.39e-42
Brhy	TRINITY_DN16170_c0_g1_i1|m.33317		Nuclear genome from Caulerpa lentillifera			Cale_scf_3	42.282	149	66	3	107	238	874471	874908	2.96e-40
Brhy	TRINITY_DN16170_c0_g1_i1|m.33317		Nuclear genome from Caulerpa lentillifera			Cale_scf_3	44.304	79	30	1	32	96	874145	874381	2.96e-40
Brhy	TRINITY_DN16170_c0_g1_i1|m.33317		Nuclear genome from Caulerpa lentillifera			Cale_scf_3	46.591	88	34	3	176	262	372441	372214	2.03e-32
Brhy	TRINITY_DN16170_c0_g1_i1|m.33317		Nuclear genome from Caulerpa lentillifera			Cale_scf_3	34.483	116	63	2	51	154	372848	372504	2.03e-32
Brhy	TRINITY_DN16170_c0_g1_i1|m.33317		Nuclear genome from Caulerpa lentillifera			Cale_scf_3	61.905	21	8	0	36	56	372940	372878	2.03e-32
Brhy	TRINITY_DN16170_c0_g1_i1|m.33317		Nuclear genome from Caulerpa lentillifera			Cale_scf_3	53.165	79	35	2	171	247	963411	963647	2.55e-16
Brhy	TRINITY_DN16170_c0_g1_i1|m.33317		Nuclear genome from Caulerpa lentillifera			Cale_scf_3	48.611	72	30	1	47	111	962861	963076	2.47e-14
Brhy	TRINITY_DN16170_c0_g1_i1|m.33317		Nuclear genome from Caulerpa lentillifera			Cale_scf_3	34.146	41	27	0	62	102	963426	963548	0.33
Brhy	TRINITY_DN16170_c0_g1_i1|m.33317		Nuclear genome from Caulerpa lentillifera			Cale_scf_23	40.865	208	110	4	34	239	456672	457262	1.21e-39
Brhy	TRINITY_DN16170_c0_g1_i1|m.33317		Nuclear genome from Caulerpa lentillifera			Cale_scf_5	39.352	216	99	6	49	246	188814	189419	1.97e-35
Brhy	TRINITY_DN16170_c0_g1_i1|m.33317		Nuclear genome from Caulerpa lentillifera			Cale_scf_5	34.322	236	114	6	38	241	441831	441151	2.03e-27
Brhy	TRINITY_DN16170_c0_g1_i1|m.33317		Nuclear genome from Caulerpa lentillifera			Cale_scf_21	40.092	217	98	6	48	246	36893	36285	2.29e-35
Brhy	TRINITY_DN16170_c0_g1_i1|m.33317		Nuclear genome from Caulerpa lentillifera			Cale_scf_2	39.352	216	99	6	49	246	1132250	1131645	2.48e-35
Brhy	TRINITY_DN16170_c0_g1_i1|m.33317		Nuclear genome from Caulerpa lentillifera			Cale_scf_2	34.404	218	107	5	50	240	747726	748352	1.95e-27
Brhy	TRINITY_DN16170_c0_g1_i1|m.33317		Nuclear genome from Caulerpa lentillifera			Cale_scf_2	34.286	35	23	0	100	134	50692	50796	6.7
Brhy	TRINITY_DN16170_c0_g1_i1|m.33317		Nuclear genome from Caulerpa lentillifera			Cale_scf_15	39.352	216	99	6	49	246	510107	509502	2.78e-35
Brhy	TRINITY_DN16170_c0_g1_i1|m.33317		Nuclear genome from Caulerpa lentillifera			Cale_scf_24	38.428	229	106	7	38	245	434451	435095	3.59e-35
Brhy	TRINITY_DN16170_c0_g1_i1|m.33317		Nuclear genome from Caulerpa lentillifera			Cale_scf_17	40.092	217	98	6	48	246	25894	25286	3.92e-35
Brhy	TRINITY_DN16170_c0_g1_i1|m.33317		Nuclear genome from Caulerpa lentillifera			Cale_scf_10	39.827	231	104	9	38	247	612719	613369	4.44e-35
Brhy	TRINITY_DN16170_c0_g1_i1|m.33317		Nuclear genome from Caulerpa lentillifera			Cale_scf_7	38.938	226	105	9	41	240	323834	324490	1.39e-31
Brhy	TRINITY_DN16170_c0_g1_i1|m.33317		Nuclear genome from Caulerpa lentillifera			Cale_scf_13	34.764	233	129	8	48	259	523498	524190	2.31e-28
Brhy	TRINITY_DN16170_c0_g1_i1|m.33317		Nuclear genome from Caulerpa lentillifera			Cale_scf_6	38.674	181	98	5	59	238	185563	185057	2.94e-27
Brhy	TRINITY_DN16170_c0_g1_i1|m.33317		Nuclear genome from Caulerpa lentillifera			Cale_scf_34	53.012	83	34	1	34	111	206853	207101	3.13e-19
Brhy	TRINITY_DN16170_c0_g1_i1|m.33317		Nuclear genome from Caulerpa lentillifera			Cale_scf_34	56.41	78	31	2	164	238	207355	207588	9.42e-19
Brhy	TRINITY_DN16170_c0_g1_i1|m.33317		Nuclear genome from Caulerpa lentillifera			Cale_scf_4	53.012	83	34	1	34	111	1220565	1220813	3.14e-19
Brhy	TRINITY_DN16170_c0_g1_i1|m.33317		Nuclear genome from Caulerpa lentillifera			Cale_scf_4	57.692	78	30	2	164	238	1221067	1221300	3.86e-19
Brhy	TRINITY_DN16170_c0_g1_i1|m.33317		Nuclear genome from Caulerpa lentillifera			Cale_scf_4	42.857	70	38	1	158	225	1022318	1022109	8.76e-10
Brhy	TRINITY_DN16170_c0_g1_i1|m.33317		Nuclear genome from Caulerpa lentillifera			Cale_scf_4	26.667	105	33	1	42	102	1022839	1022525	2.65e-05
Brhy	TRINITY_DN16170_c0_g1_i1|m.33317		Nuclear genome from Caulerpa lentillifera			Cale_scf_4	30.952	42	28	1	62	102	1022264	1022139	3.4
Brhy	TRINITY_DN16170_c0_g1_i1|m.33317		Nuclear genome from Caulerpa lentillifera			Cale_scf_19	29.73	259	109	7	42	239	25507	26247	1.01e-18
Brhy	TRINITY_DN16170_c0_g1_i1|m.33317		Nuclear genome from Caulerpa lentillifera			Cale_scf_26	53.247	77	34	2	171	245	223480	223710	7.75e-16
Brhy	TRINITY_DN16170_c0_g1_i1|m.33317		Nuclear genome from Caulerpa lentillifera			Cale_scf_26	35.172	145	65	5	47	166	222920	223342	9.38e-15
Brhy	TRINITY_DN16170_c0_g1_i1|m.33317		Nuclear genome from Caulerpa lentillifera			Cale_scf_26	34.146	41	27	0	62	102	223495	223617	0.33
Brhy	TRINITY_DN16170_c0_g1_i1|m.33317		Nuclear genome from Caulerpa lentillifera			Cale_scf_78	37.5	40	24	1	169	207	5569	5450	2.2
Brhy	TRINITY_DN16179_c0_g1_i1|m.33383		Nuclear genome from Caulerpa lentillifera			Cale_scf_12	53	200	91	3	54	250	925672	925073	1.71e-62
Brhy	TRINITY_DN16179_c0_g1_i1|m.33383		Nuclear genome from Caulerpa lentillifera			Cale_scf_6	52.451	204	91	4	53	250	1012783	1013394	1.19e-61
Brhy	TRINITY_DN16179_c0_g1_i1|m.33383		Nuclear genome from Caulerpa lentillifera			Cale_scf_32	31.507	73	48	2	171	241	206383	206601	1.1
Brhy	TRINITY_DN16266_c0_g1_i1|m.18608		Nuclear genome from Caulerpa lentillifera			Cale_scf_14	60.664	211	63	2	30	223	765300	764677	1.95e-78
Brhy	TRINITY_DN16266_c0_g1_i1|m.18608		Nuclear genome from Caulerpa lentillifera			Cale_scf_23	58.605	215	70	2	25	223	456657	457292	1.35e-76
Brhy	TRINITY_DN16266_c0_g1_i1|m.18608		Nuclear genome from Caulerpa lentillifera			Cale_scf_3	44.248	113	47	3	47	144	372848	372513	1.64e-41
Brhy	TRINITY_DN16266_c0_g1_i1|m.18608		Nuclear genome from Caulerpa lentillifera			Cale_scf_3	55	60	27	0	153	212	372444	372265	1.64e-41
Brhy	TRINITY_DN16266_c0_g1_i1|m.18608		Nuclear genome from Caulerpa lentillifera			Cale_scf_3	63.636	22	8	0	31	52	372943	372878	1.64e-41
Brhy	TRINITY_DN16266_c0_g1_i1|m.18608		Nuclear genome from Caulerpa lentillifera			Cale_scf_3	40	80	34	1	27	92	874142	874381	1.41e-24
Brhy	TRINITY_DN16266_c0_g1_i1|m.18608		Nuclear genome from Caulerpa lentillifera			Cale_scf_3	27.152	151	74	2	103	217	874471	874923	1.41e-24
Brhy	TRINITY_DN16266_c0_g1_i1|m.18608		Nuclear genome from Caulerpa lentillifera			Cale_scf_3	39	100	55	2	121	214	963324	963623	7.47e-11
Brhy	TRINITY_DN16266_c0_g1_i1|m.18608		Nuclear genome from Caulerpa lentillifera			Cale_scf_3	38.372	86	43	3	34	109	962825	963082	5.87e-09
Brhy	TRINITY_DN16266_c0_g1_i1|m.18608		Nuclear genome from Caulerpa lentillifera			Cale_scf_3	32.877	73	41	2	58	127	963426	963629	1
Brhy	TRINITY_DN16266_c0_g1_i1|m.18608		Nuclear genome from Caulerpa lentillifera			Cale_scf_3	31.373	51	33	1	163	213	312408	312262	6.7
Brhy	TRINITY_DN16266_c0_g1_i1|m.18608		Nuclear genome from Caulerpa lentillifera			Cale_scf_6	41.477	176	88	6	55	217	185563	185042	2.55e-28
Brhy	TRINITY_DN16266_c0_g1_i1|m.18608		Nuclear genome from Caulerpa lentillifera			Cale_scf_7	37.736	212	91	9	46	216	323861	324496	1.13e-26
Brhy	TRINITY_DN16266_c0_g1_i1|m.18608		Nuclear genome from Caulerpa lentillifera			Cale_scf_5	34.762	210	109	5	34	215	188772	189401	1.55e-26
Brhy	TRINITY_DN16266_c0_g1_i1|m.18608		Nuclear genome from Caulerpa lentillifera			Cale_scf_5	33.333	210	90	5	47	211	441777	441163	3.73e-22
Brhy	TRINITY_DN16266_c0_g1_i1|m.18608		Nuclear genome from Caulerpa lentillifera			Cale_scf_5	30	40	25	1	154	193	362364	362254	2.3
Brhy	TRINITY_DN16266_c0_g1_i1|m.18608		Nuclear genome from Caulerpa lentillifera			Cale_scf_2	34.762	210	109	5	34	215	1132292	1131663	2.65e-26
Brhy	TRINITY_DN16266_c0_g1_i1|m.18608		Nuclear genome from Caulerpa lentillifera			Cale_scf_2	33.175	211	91	5	46	211	747726	748343	8.38e-24
Brhy	TRINITY_DN16266_c0_g1_i1|m.18608		Nuclear genome from Caulerpa lentillifera			Cale_scf_15	34.762	210	109	5	34	215	510149	509520	2.81e-26
Brhy	TRINITY_DN16266_c0_g1_i1|m.18608		Nuclear genome from Caulerpa lentillifera			Cale_scf_24	34.762	210	109	5	34	215	434451	435080	3.12e-26
Brhy	TRINITY_DN16266_c0_g1_i1|m.18608		Nuclear genome from Caulerpa lentillifera			Cale_scf_10	35.849	212	100	8	34	213	612719	613342	4.65e-25
Brhy	TRINITY_DN16266_c0_g1_i1|m.18608		Nuclear genome from Caulerpa lentillifera			Cale_scf_21	35.897	195	100	5	44	213	36893	36309	2.39e-24
Brhy	TRINITY_DN16266_c0_g1_i1|m.18608		Nuclear genome from Caulerpa lentillifera			Cale_scf_17	35.897	195	100	5	44	213	25894	25310	3.07e-24
Brhy	TRINITY_DN16266_c0_g1_i1|m.18608		Nuclear genome from Caulerpa lentillifera			Cale_scf_13	30.415	217	109	7	34	208	523462	524112	1.65e-20
Brhy	TRINITY_DN16266_c0_g1_i1|m.18608		Nuclear genome from Caulerpa lentillifera			Cale_scf_4	46.809	94	45	2	30	118	1220565	1220846	5.62e-18
Brhy	TRINITY_DN16266_c0_g1_i1|m.18608		Nuclear genome from Caulerpa lentillifera			Cale_scf_4	38.272	81	44	1	143	217	1221073	1221315	7.72e-10
Brhy	TRINITY_DN16266_c0_g1_i1|m.18608		Nuclear genome from Caulerpa lentillifera			Cale_scf_4	35.106	94	45	4	116	198	1022378	1022112	6.77e-05
Brhy	TRINITY_DN16266_c0_g1_i1|m.18608		Nuclear genome from Caulerpa lentillifera			Cale_scf_4	42.857	35	20	0	38	72	1022839	1022735	0.014
Brhy	TRINITY_DN16266_c0_g1_i1|m.18608		Nuclear genome from Caulerpa lentillifera			Cale_scf_34	46.809	94	45	2	30	118	206853	207134	6.05e-18
Brhy	TRINITY_DN16266_c0_g1_i1|m.18608		Nuclear genome from Caulerpa lentillifera			Cale_scf_34	40	70	36	1	154	217	207394	207603	1.1e-09
Brhy	TRINITY_DN16266_c0_g1_i1|m.18608		Nuclear genome from Caulerpa lentillifera			Cale_scf_19	27.197	239	89	9	38	198	25507	26202	2.23e-10
Brhy	TRINITY_DN16266_c0_g1_i1|m.18608		Nuclear genome from Caulerpa lentillifera			Cale_scf_26	38.393	112	58	4	111	214	223366	223692	2.47e-10
Brhy	TRINITY_DN16266_c0_g1_i1|m.18608		Nuclear genome from Caulerpa lentillifera			Cale_scf_26	39.535	86	42	3	34	109	222884	223141	3.06e-09
Brhy	TRINITY_DN16266_c0_g1_i1|m.18608		Nuclear genome from Caulerpa lentillifera			Cale_scf_26	32.877	73	41	2	58	127	223495	223698	1
Brhy	TRINITY_DN16266_c0_g1_i1|m.18608		Nuclear genome from Caulerpa lentillifera			Cale_scf_1	35.294	51	27	2	122	167	1062822	1062673	0.1
Brhy	TRINITY_DN16338_c0_g1_i1|m.1033		Nuclear genome from Caulerpa lentillifera			Cale_scf_2	30.645	124	68	4	151	257	649754	650122	5.15e-15
Brhy	TRINITY_DN16338_c0_g1_i1|m.1033		Nuclear genome from Caulerpa lentillifera			Cale_scf_2	47.222	36	19	0	118	153	649614	649721	5.15e-15
Brhy	TRINITY_DN16357_c0_g1_i1|m.1070		Nuclear genome from Caulerpa lentillifera			Cale_scf_34	61.957	92	32	1	30	121	206835	207101	5.71e-51
Brhy	TRINITY_DN16357_c0_g1_i1|m.1070		Nuclear genome from Caulerpa lentillifera			Cale_scf_34	59.155	71	25	2	174	240	207373	207585	5.71e-51
Brhy	TRINITY_DN16357_c0_g1_i1|m.1070		Nuclear genome from Caulerpa lentillifera			Cale_scf_34	59.259	27	11	0	130	156	207185	207265	5.71e-51
Brhy	TRINITY_DN16357_c0_g1_i1|m.1070		Nuclear genome from Caulerpa lentillifera			Cale_scf_34	32	50	33	1	59	107	207379	207528	1.6
Brhy	TRINITY_DN16357_c0_g1_i1|m.1070		Nuclear genome from Caulerpa lentillifera			Cale_scf_4	60.87	92	33	1	30	121	1220547	1220813	4.17e-50
Brhy	TRINITY_DN16357_c0_g1_i1|m.1070		Nuclear genome from Caulerpa lentillifera			Cale_scf_4	57.746	71	26	2	174	240	1221085	1221297	4.17e-50
Brhy	TRINITY_DN16357_c0_g1_i1|m.1070		Nuclear genome from Caulerpa lentillifera			Cale_scf_4	59.259	27	11	0	130	156	1220897	1220977	4.17e-50
Brhy	TRINITY_DN16357_c0_g1_i1|m.1070		Nuclear genome from Caulerpa lentillifera			Cale_scf_4	62	50	16	1	175	221	1022279	1022130	5.21e-10
Brhy	TRINITY_DN16357_c0_g1_i1|m.1070		Nuclear genome from Caulerpa lentillifera			Cale_scf_4	25.714	105	34	1	44	104	1022839	1022525	8.36e-06
Brhy	TRINITY_DN16357_c0_g1_i1|m.1070		Nuclear genome from Caulerpa lentillifera			Cale_scf_4	35.294	51	31	2	59	108	1022276	1022127	0.036
Brhy	TRINITY_DN16357_c0_g1_i1|m.1070		Nuclear genome from Caulerpa lentillifera			Cale_scf_3	46.853	143	55	3	116	237	874468	874896	3.79e-49
Brhy	TRINITY_DN16357_c0_g1_i1|m.1070		Nuclear genome from Caulerpa lentillifera			Cale_scf_3	54.321	81	23	1	36	102	874151	874393	3.79e-49
Brhy	TRINITY_DN16357_c0_g1_i1|m.1070		Nuclear genome from Caulerpa lentillifera			Cale_scf_3	55.738	61	27	0	180	240	372450	372268	1.93e-34
Brhy	TRINITY_DN16357_c0_g1_i1|m.1070		Nuclear genome from Caulerpa lentillifera			Cale_scf_3	33.913	115	67	2	54	159	372845	372501	1.93e-34
Brhy	TRINITY_DN16357_c0_g1_i1|m.1070		Nuclear genome from Caulerpa lentillifera			Cale_scf_3	44.444	45	21	1	18	58	373012	372878	1.93e-34
Brhy	TRINITY_DN16357_c0_g1_i1|m.1070		Nuclear genome from Caulerpa lentillifera			Cale_scf_3	44.828	116	46	3	132	244	963324	963626	1.15e-17
Brhy	TRINITY_DN16357_c0_g1_i1|m.1070		Nuclear genome from Caulerpa lentillifera			Cale_scf_3	41.667	108	52	5	35	133	962792	963109	3.29e-14
Brhy	TRINITY_DN16357_c0_g1_i1|m.1070		Nuclear genome from Caulerpa lentillifera			Cale_scf_3	37.5	56	34	1	52	107	963393	963557	0.009
Brhy	TRINITY_DN16357_c0_g1_i1|m.1070		Nuclear genome from Caulerpa lentillifera			Cale_scf_14	43.644	236	117	6	7	240	765378	764713	6.47e-47
Brhy	TRINITY_DN16357_c0_g1_i1|m.1070		Nuclear genome from Caulerpa lentillifera			Cale_scf_23	44.131	213	104	5	29	238	456648	457250	3.71e-43
Brhy	TRINITY_DN16357_c0_g1_i1|m.1070		Nuclear genome from Caulerpa lentillifera			Cale_scf_23	37.838	37	19	1	204	236	460687	460577	7.1
Brhy	TRINITY_DN16357_c0_g1_i1|m.1070		Nuclear genome from Caulerpa lentillifera			Cale_scf_5	39.431	246	104	8	16	233	188682	189368	4.05e-39
Brhy	TRINITY_DN16357_c0_g1_i1|m.1070		Nuclear genome from Caulerpa lentillifera			Cale_scf_5	40.175	229	105	6	40	241	441831	441160	4.54e-36
Brhy	TRINITY_DN16357_c0_g1_i1|m.1070		Nuclear genome from Caulerpa lentillifera			Cale_scf_2	39.231	260	109	10	3	233	1132415	1131696	2.16e-38
Brhy	TRINITY_DN16357_c0_g1_i1|m.1070		Nuclear genome from Caulerpa lentillifera			Cale_scf_2	38.865	229	108	6	40	241	747675	748346	1.52e-35
Brhy	TRINITY_DN16357_c0_g1_i1|m.1070		Nuclear genome from Caulerpa lentillifera			Cale_scf_7	38.596	228	121	7	31	240	323801	324481	5.22e-38
Brhy	TRINITY_DN16357_c0_g1_i1|m.1070		Nuclear genome from Caulerpa lentillifera			Cale_scf_7	38.71	31	19	0	203	233	77777	77685	8.3
Brhy	TRINITY_DN16357_c0_g1_i1|m.1070		Nuclear genome from Caulerpa lentillifera			Cale_scf_15	39.207	227	93	8	35	233	510182	509553	2.9e-35
Brhy	TRINITY_DN16357_c0_g1_i1|m.1070		Nuclear genome from Caulerpa lentillifera			Cale_scf_24	39.207	227	93	8	35	233	434418	435047	5.05e-35
Brhy	TRINITY_DN16357_c0_g1_i1|m.1070		Nuclear genome from Caulerpa lentillifera			Cale_scf_17	39.904	208	89	6	49	237	25897	25325	1.81e-34
Brhy	TRINITY_DN16357_c0_g1_i1|m.1070		Nuclear genome from Caulerpa lentillifera			Cale_scf_21	39.423	208	90	6	49	237	36896	36324	9.07e-34
Brhy	TRINITY_DN16357_c0_g1_i1|m.1070		Nuclear genome from Caulerpa lentillifera			Cale_scf_13	38.197	233	93	8	40	237	523462	524112	2.23e-33
Brhy	TRINITY_DN16357_c0_g1_i1|m.1070		Nuclear genome from Caulerpa lentillifera			Cale_scf_10	37.991	229	105	9	26	233	612677	613315	1.74e-32
Brhy	TRINITY_DN16357_c0_g1_i1|m.1070		Nuclear genome from Caulerpa lentillifera			Cale_scf_10	40	30	18	0	88	117	44456	44545	3.7
Brhy	TRINITY_DN16357_c0_g1_i1|m.1070		Nuclear genome from Caulerpa lentillifera			Cale_scf_6	38.378	185	86	5	61	237	185563	185069	4.47e-27
Brhy	TRINITY_DN16357_c0_g1_i1|m.1070		Nuclear genome from Caulerpa lentillifera			Cale_scf_19	28.62	297	112	11	3	221	25360	26184	2.98e-19
Brhy	TRINITY_DN16357_c0_g1_i1|m.1070		Nuclear genome from Caulerpa lentillifera			Cale_scf_19	39.216	51	29	2	59	108	26038	26187	0.01
Brhy	TRINITY_DN16357_c0_g1_i1|m.1070		Nuclear genome from Caulerpa lentillifera			Cale_scf_26	44	125	51	4	112	233	223336	223662	7.26e-17
Brhy	TRINITY_DN16357_c0_g1_i1|m.1070		Nuclear genome from Caulerpa lentillifera			Cale_scf_26	41.441	111	54	5	32	133	222842	223168	2.35e-14
Brhy	TRINITY_DN16357_c0_g1_i1|m.1070		Nuclear genome from Caulerpa lentillifera			Cale_scf_26	37.5	56	34	1	52	107	223462	223626	0.009
Brhy	TRINITY_DN16641_c1_g2_i1|m.37990		Nuclear genome from Caulerpa lentillifera			Cale_scf_16	30.172	232	130	9	79	306	343795	343184	1.86e-22
Brhy	TRINITY_DN16641_c1_g2_i1|m.37990		Nuclear genome from Caulerpa lentillifera			Cale_scf_2	29.412	153	97	5	110	257	755294	754854	3.07e-09
Brhy	TRINITY_DN16641_c1_g2_i1|m.37990		Nuclear genome from Caulerpa lentillifera			Cale_scf_2	44.186	43	23	1	79	121	755437	755312	0.03
Brhy	TRINITY_DN16641_c1_g2_i1|m.37990		Nuclear genome from Caulerpa lentillifera			Cale_scf_2	31.579	38	25	1	152	189	83362	83472	6.1
Brhy	TRINITY_DN16641_c1_g2_i1|m.37990		Nuclear genome from Caulerpa lentillifera			Cale_scf_9	30.968	155	86	6	78	225	486322	485900	1.42e-06
Brhy	TRINITY_DN16641_c1_g2_i1|m.37990		Nuclear genome from Caulerpa lentillifera			Cale_scf_9	26.794	209	123	9	78	267	588438	587845	0.000245
Brhy	TRINITY_DN16641_c1_g2_i1|m.37990		Nuclear genome from Caulerpa lentillifera			Cale_scf_9	32.292	96	59	3	72	165	236469	236744	0.006
Brhy	TRINITY_DN16641_c1_g2_i1|m.37990		Nuclear genome from Caulerpa lentillifera			Cale_scf_9	27.778	162	94	6	77	233	166142	166573	0.007
Brhy	TRINITY_DN16641_c1_g2_i1|m.37990		Nuclear genome from Caulerpa lentillifera			Cale_scf_9	25.949	158	102	6	78	231	171466	171906	0.007
Brhy	TRINITY_DN16641_c1_g2_i1|m.37990		Nuclear genome from Caulerpa lentillifera			Cale_scf_9	37.5	40	25	0	77	116	184097	183978	0.018
Brhy	TRINITY_DN16641_c1_g2_i1|m.37990		Nuclear genome from Caulerpa lentillifera			Cale_scf_9	32.584	89	54	4	79	165	167521	167775	0.019
Brhy	TRINITY_DN16641_c1_g2_i1|m.37990		Nuclear genome from Caulerpa lentillifera			Cale_scf_9	27.407	135	90	6	78	210	585196	584810	0.066
Brhy	TRINITY_DN16641_c1_g2_i1|m.37990		Nuclear genome from Caulerpa lentillifera			Cale_scf_9	30.851	94	58	4	77	167	186875	186606	0.14
Brhy	TRINITY_DN16641_c1_g2_i1|m.37990		Nuclear genome from Caulerpa lentillifera			Cale_scf_9	26.667	135	91	5	78	210	587225	586839	0.18
Brhy	TRINITY_DN16641_c1_g2_i1|m.37990		Nuclear genome from Caulerpa lentillifera			Cale_scf_9	38.235	34	21	0	77	110	185590	185489	0.25
Brhy	TRINITY_DN16641_c1_g2_i1|m.37990		Nuclear genome from Caulerpa lentillifera			Cale_scf_9	33.333	42	28	0	79	120	170190	170315	2.3
Brhy	TRINITY_DN16641_c1_g2_i1|m.37990		Nuclear genome from Caulerpa lentillifera			Cale_scf_9	38.235	34	21	0	77	110	585808	585707	2.9
Brhy	TRINITY_DN16641_c1_g2_i1|m.37990		Nuclear genome from Caulerpa lentillifera			Cale_scf_3	30	140	86	4	75	208	834010	834411	1.55e-05
Brhy	TRINITY_DN16641_c1_g2_i1|m.37990		Nuclear genome from Caulerpa lentillifera			Cale_scf_25	31.111	135	85	5	78	210	95008	95394	7.09e-05
Brhy	TRINITY_DN16641_c1_g2_i1|m.37990		Nuclear genome from Caulerpa lentillifera			Cale_scf_11	29.688	128	75	5	78	192	750956	750579	0.013
Brhy	TRINITY_DN16641_c1_g2_i1|m.37990		Nuclear genome from Caulerpa lentillifera			Cale_scf_28	31.765	85	55	2	79	160	301875	302129	0.03
Brhy	TRINITY_DN16641_c1_g2_i1|m.37990		Nuclear genome from Caulerpa lentillifera			Cale_scf_27	26.144	153	95	3	77	224	97092	97511	0.088
Brhy	TRINITY_DN16641_c1_g2_i1|m.37990		Nuclear genome from Caulerpa lentillifera			Cale_scf_24	28.037	107	69	4	79	181	173223	172915	0.11
Brhy	TRINITY_DN16641_c1_g2_i1|m.37990		Nuclear genome from Caulerpa lentillifera			Cale_scf_15	22.388	134	91	4	42	165	784049	784441	0.18
Brhy	TRINITY_DN16641_c1_g2_i1|m.37990		Nuclear genome from Caulerpa lentillifera			Cale_scf_29	40.625	32	19	0	76	107	235691	235596	0.72
Brhy	TRINITY_DN16641_c1_g2_i1|m.37990		Nuclear genome from Caulerpa lentillifera			Cale_scf_29	28.947	76	52	1	90	165	223239	223018	1.3
Brhy	TRINITY_DN16641_c1_g2_i1|m.37990		Nuclear genome from Caulerpa lentillifera			Cale_scf_1	24.138	145	93	4	5	136	1243752	1244174	2.9
Brhy	TRINITY_DN16641_c1_g2_i1|m.37990		Nuclear genome from Caulerpa lentillifera			Cale_scf_18	43.75	32	18	0	79	110	175825	175730	3.1
Brhy	TRINITY_DN16641_c1_g2_i1|m.37990		Nuclear genome from Caulerpa lentillifera			Cale_scf_45	26.866	134	86	6	79	210	16295	16666	3.3
Brhy	TRINITY_DN1758_c0_g1_i1|m.7636		Nuclear genome from Caulerpa lentillifera			Cale_scf_17	81.897	116	21	0	2	117	25840	25493	2.09e-61
Brhy	TRINITY_DN1758_c0_g1_i1|m.7636		Nuclear genome from Caulerpa lentillifera			Cale_scf_17	41.379	29	17	0	2	30	25492	25406	2.1
Brhy	TRINITY_DN1758_c0_g1_i1|m.7636		Nuclear genome from Caulerpa lentillifera			Cale_scf_21	81.034	116	22	0	2	117	36839	36492	1.49e-60
Brhy	TRINITY_DN1758_c0_g1_i1|m.7636		Nuclear genome from Caulerpa lentillifera			Cale_scf_21	41.379	29	17	0	2	30	36491	36405	2
Brhy	TRINITY_DN1758_c0_g1_i1|m.7636		Nuclear genome from Caulerpa lentillifera			Cale_scf_5	80.342	117	23	0	1	117	188862	189212	1.01e-59
Brhy	TRINITY_DN1758_c0_g1_i1|m.7636		Nuclear genome from Caulerpa lentillifera			Cale_scf_5	40	130	61	4	2	115	441732	441346	2.48e-15
Brhy	TRINITY_DN1758_c0_g1_i1|m.7636		Nuclear genome from Caulerpa lentillifera			Cale_scf_5	41.379	29	17	0	2	30	189213	189299	2.3
Brhy	TRINITY_DN1758_c0_g1_i1|m.7636		Nuclear genome from Caulerpa lentillifera			Cale_scf_2	80.342	117	23	0	1	117	1132202	1131852	1.32e-59
Brhy	TRINITY_DN1758_c0_g1_i1|m.7636		Nuclear genome from Caulerpa lentillifera			Cale_scf_2	37.692	130	64	4	2	115	747774	748160	2.17e-17
Brhy	TRINITY_DN1758_c0_g1_i1|m.7636		Nuclear genome from Caulerpa lentillifera			Cale_scf_2	41.379	29	17	0	2	30	1131851	1131765	2.3
Brhy	TRINITY_DN1758_c0_g1_i1|m.7636		Nuclear genome from Caulerpa lentillifera			Cale_scf_15	80.342	117	23	0	1	117	510059	509709	1.33e-59
Brhy	TRINITY_DN1758_c0_g1_i1|m.7636		Nuclear genome from Caulerpa lentillifera			Cale_scf_15	41.379	29	17	0	2	30	509708	509622	2.4
Brhy	TRINITY_DN1758_c0_g1_i1|m.7636		Nuclear genome from Caulerpa lentillifera			Cale_scf_24	80.342	117	23	0	1	117	434541	434891	1.93e-59
Brhy	TRINITY_DN1758_c0_g1_i1|m.7636		Nuclear genome from Caulerpa lentillifera			Cale_scf_24	41.379	29	17	0	2	30	434892	434978	1.9
Brhy	TRINITY_DN1758_c0_g1_i1|m.7636		Nuclear genome from Caulerpa lentillifera			Cale_scf_10	72.65	117	31	1	2	117	612809	613159	5.88e-51
Brhy	TRINITY_DN1758_c0_g1_i1|m.7636		Nuclear genome from Caulerpa lentillifera			Cale_scf_10	41.379	29	17	0	2	30	613160	613246	4.4
Brhy	TRINITY_DN1758_c0_g1_i1|m.7636		Nuclear genome from Caulerpa lentillifera			Cale_scf_13	62.879	132	34	2	1	117	523549	523944	1.03e-48
Brhy	TRINITY_DN1758_c0_g1_i1|m.7636		Nuclear genome from Caulerpa lentillifera			Cale_scf_13	37.5	32	16	1	69	96	607390	607485	1.7
Brhy	TRINITY_DN1758_c0_g1_i1|m.7636		Nuclear genome from Caulerpa lentillifera			Cale_scf_3	71.765	85	24	0	1	85	962915	963169	1.59e-37
Brhy	TRINITY_DN1758_c0_g1_i1|m.7636		Nuclear genome from Caulerpa lentillifera			Cale_scf_3	63.158	38	14	0	80	117	963324	963437	2.85e-08
Brhy	TRINITY_DN1758_c0_g1_i1|m.7636		Nuclear genome from Caulerpa lentillifera			Cale_scf_3	50	38	19	0	2	39	874289	874402	8.04e-05
Brhy	TRINITY_DN1758_c0_g1_i1|m.7636		Nuclear genome from Caulerpa lentillifera			Cale_scf_3	41.379	29	17	0	2	30	963438	963524	3.1
Brhy	TRINITY_DN1758_c0_g1_i1|m.7636		Nuclear genome from Caulerpa lentillifera			Cale_scf_26	63	100	34	1	1	97	222974	223273	3.78e-37
Brhy	TRINITY_DN1758_c0_g1_i1|m.7636		Nuclear genome from Caulerpa lentillifera			Cale_scf_26	66.667	33	11	0	85	117	223408	223506	4e-08
Brhy	TRINITY_DN1758_c0_g1_i1|m.7636		Nuclear genome from Caulerpa lentillifera			Cale_scf_26	41.379	29	17	0	2	30	223507	223593	3.1
Brhy	TRINITY_DN1758_c0_g1_i1|m.7636		Nuclear genome from Caulerpa lentillifera			Cale_scf_6	34.454	119	58	4	2	117	185542	185237	8.87e-11
Brhy	TRINITY_DN1758_c0_g1_i1|m.7636		Nuclear genome from Caulerpa lentillifera			Cale_scf_19	36.441	118	52	5	12	117	25741	26061	1.69e-09
Brhy	TRINITY_DN1758_c0_g1_i1|m.7636		Nuclear genome from Caulerpa lentillifera			Cale_scf_19	40.741	27	16	0	4	30	26071	26151	5.2
Brhy	TRINITY_DN1758_c0_g1_i1|m.7636		Nuclear genome from Caulerpa lentillifera			Cale_scf_4	53.571	28	13	0	10	37	1022611	1022528	1.55e-08
Brhy	TRINITY_DN1758_c0_g1_i1|m.7636		Nuclear genome from Caulerpa lentillifera			Cale_scf_4	41.791	67	30	3	52	117	1022429	1022253	1.55e-08
Brhy	TRINITY_DN1758_c0_g1_i1|m.7636		Nuclear genome from Caulerpa lentillifera			Cale_scf_4	37.5	80	47	3	2	81	1220661	1220891	6.26e-07
Brhy	TRINITY_DN1758_c0_g1_i1|m.7636		Nuclear genome from Caulerpa lentillifera			Cale_scf_34	37.5	80	47	3	2	81	206949	207179	4.77e-07
Brhy	TRINITY_DN1758_c0_g1_i1|m.7636		Nuclear genome from Caulerpa lentillifera			Cale_scf_7	32.773	119	53	6	14	114	323963	324292	0.000116
Brhy	TRINITY_DN1758_c0_g1_i1|m.7636		Nuclear genome from Caulerpa lentillifera			Cale_scf_23	28.866	97	47	3	2	98	456768	456992	0.091
Brhy	TRINITY_DN1758_c0_g1_i1|m.7636		Nuclear genome from Caulerpa lentillifera			Cale_scf_14	44.444	36	20	0	2	37	765204	765097	0.11
Brhy	TRINITY_DN1758_c0_g1_i1|m.7636		Nuclear genome from Caulerpa lentillifera			Cale_scf_35	28.571	42	30	0	76	117	112970	112845	0.16
Brhy	TRINITY_DN20081_c0_g1_i1|m.33879		Nuclear genome from Caulerpa lentillifera			Cale_scf_1	51.923	52	25	0	68	119	250013	250168	2.35e-09
Brhy	TRINITY_DN20081_c0_g1_i1|m.33879		Nuclear genome from Caulerpa lentillifera			Cale_scf_22	38.235	34	21	0	63	96	278512	278411	2.1
Brhy	TRINITY_DN20081_c0_g1_i1|m.33879		Nuclear genome from Caulerpa lentillifera			Cale_scf_11	32.727	55	34	1	32	86	385637	385792	3.5
Brhy	TRINITY_DN20081_c0_g1_i1|m.33879		Nuclear genome from Caulerpa lentillifera			Cale_scf_5	32.258	62	34	2	46	107	983286	983447	6
Brhy	TRINITY_DN20081_c0_g1_i1|m.33879		Nuclear genome from Caulerpa lentillifera			Cale_scf_14	45.946	37	16	2	43	78	471570	471671	6.9
Brhy	TRINITY_DN20081_c0_g1_i1|m.33879		Nuclear genome from Caulerpa lentillifera			Cale_scf_14	45.946	37	16	2	43	78	531133	531032	9.7
Brhy	TRINITY_DN20081_c0_g1_i1|m.33879		Nuclear genome from Caulerpa lentillifera			Cale_scf_17	50	26	13	0	35	60	668206	668129	9.6
Brhy	TRINITY_DN20083_c0_g1_i1|m.33830		Nuclear genome from Caulerpa lentillifera			Cale_scf_19	64.437	284	81	4	1	265	25363	26211	1.34e-102
Brhy	TRINITY_DN20083_c0_g1_i1|m.33830		Nuclear genome from Caulerpa lentillifera			Cale_scf_4	76.991	113	26	0	156	268	1022432	1022094	1.35e-87
Brhy	TRINITY_DN20083_c0_g1_i1|m.33830		Nuclear genome from Caulerpa lentillifera			Cale_scf_4	59.873	157	59	3	2	155	1022980	1022513	1.35e-87
Brhy	TRINITY_DN20083_c0_g1_i1|m.33830		Nuclear genome from Caulerpa lentillifera			Cale_scf_4	29.371	143	51	3	46	182	1220586	1220882	7.39e-09
Brhy	TRINITY_DN20083_c0_g1_i1|m.33830		Nuclear genome from Caulerpa lentillifera			Cale_scf_4	47.619	63	32	1	200	261	1221067	1221255	1.22e-08
Brhy	TRINITY_DN20083_c0_g1_i1|m.33830		Nuclear genome from Caulerpa lentillifera			Cale_scf_4	42.553	47	26	1	212	258	1220649	1220786	0.022
Brhy	TRINITY_DN20083_c0_g1_i1|m.33830		Nuclear genome from Caulerpa lentillifera			Cale_scf_4	50	28	14	0	125	152	1022219	1022136	0.27
Brhy	TRINITY_DN20083_c0_g1_i1|m.33830		Nuclear genome from Caulerpa lentillifera			Cale_scf_6	43.571	140	77	2	123	261	185518	185102	4.93e-30
Brhy	TRINITY_DN20083_c0_g1_i1|m.33830		Nuclear genome from Caulerpa lentillifera			Cale_scf_17	40.541	148	70	5	125	256	25810	25373	3.28e-20
Brhy	TRINITY_DN20083_c0_g1_i1|m.33830		Nuclear genome from Caulerpa lentillifera			Cale_scf_2	41.06	151	65	7	125	256	1132169	1131732	8.03e-20
Brhy	TRINITY_DN20083_c0_g1_i1|m.33830		Nuclear genome from Caulerpa lentillifera			Cale_scf_2	27.273	242	101	7	55	266	747726	748316	1.65e-16
Brhy	TRINITY_DN20083_c0_g1_i1|m.33830		Nuclear genome from Caulerpa lentillifera			Cale_scf_5	41.06	151	65	7	125	256	188895	189332	8.74e-20
Brhy	TRINITY_DN20083_c0_g1_i1|m.33830		Nuclear genome from Caulerpa lentillifera			Cale_scf_5	28.682	258	102	9	45	266	441825	441190	1.54e-15
Brhy	TRINITY_DN20083_c0_g1_i1|m.33830		Nuclear genome from Caulerpa lentillifera			Cale_scf_24	41.06	151	65	7	125	256	434574	435011	1.03e-19
Brhy	TRINITY_DN20083_c0_g1_i1|m.33830		Nuclear genome from Caulerpa lentillifera			Cale_scf_15	41.06	151	65	7	125	256	510026	509589	1.06e-19
Brhy	TRINITY_DN20083_c0_g1_i1|m.33830		Nuclear genome from Caulerpa lentillifera			Cale_scf_21	40.397	151	66	6	125	256	36809	36372	1.19e-19
Brhy	TRINITY_DN20083_c0_g1_i1|m.33830		Nuclear genome from Caulerpa lentillifera			Cale_scf_10	40.789	152	65	8	125	256	612839	613279	1.21e-18
Brhy	TRINITY_DN20083_c0_g1_i1|m.33830		Nuclear genome from Caulerpa lentillifera			Cale_scf_13	35.976	164	74	7	123	256	523576	524064	2.37e-14
Brhy	TRINITY_DN20083_c0_g1_i1|m.33830		Nuclear genome from Caulerpa lentillifera			Cale_scf_13	40	40	23	1	219	257	523558	523677	0.31
Brhy	TRINITY_DN20083_c0_g1_i1|m.33830		Nuclear genome from Caulerpa lentillifera			Cale_scf_3	51.111	45	16	1	212	256	372441	372325	3.34e-11
Brhy	TRINITY_DN20083_c0_g1_i1|m.33830		Nuclear genome from Caulerpa lentillifera			Cale_scf_3	30.769	78	47	1	126	196	372770	372537	3.34e-11
Brhy	TRINITY_DN20083_c0_g1_i1|m.33830		Nuclear genome from Caulerpa lentillifera			Cale_scf_3	45	80	40	2	180	256	963321	963557	2.35e-09
Brhy	TRINITY_DN20083_c0_g1_i1|m.33830		Nuclear genome from Caulerpa lentillifera			Cale_scf_3	32.836	134	50	4	155	256	874471	874848	2.16e-08
Brhy	TRINITY_DN20083_c0_g1_i1|m.33830		Nuclear genome from Caulerpa lentillifera			Cale_scf_3	50	62	20	4	119	171	962936	963115	7.13e-07
Brhy	TRINITY_DN20083_c0_g1_i1|m.33830		Nuclear genome from Caulerpa lentillifera			Cale_scf_3	36	50	30	2	205	253	874253	874399	0.49
Brhy	TRINITY_DN20083_c0_g1_i1|m.33830		Nuclear genome from Caulerpa lentillifera			Cale_scf_14	29.536	237	94	10	42	262	765291	764752	6.19e-11
Brhy	TRINITY_DN20083_c0_g1_i1|m.33830		Nuclear genome from Caulerpa lentillifera			Cale_scf_23	28.631	241	90	10	42	262	456681	457217	4.41e-10
Brhy	TRINITY_DN20083_c0_g1_i1|m.33830		Nuclear genome from Caulerpa lentillifera			Cale_scf_7	25.197	254	100	8	41	256	323819	324424	1.92e-09
Brhy	TRINITY_DN20083_c0_g1_i1|m.33830		Nuclear genome from Caulerpa lentillifera			Cale_scf_26	42.857	84	44	2	176	256	223378	223626	4.05e-09
Brhy	TRINITY_DN20083_c0_g1_i1|m.33830		Nuclear genome from Caulerpa lentillifera			Cale_scf_26	50	62	20	4	119	171	222995	223174	9.68e-07
Brhy	TRINITY_DN20083_c0_g1_i1|m.33830		Nuclear genome from Caulerpa lentillifera			Cale_scf_34	28.671	143	52	3	46	182	206874	207170	7.18e-09
Brhy	TRINITY_DN20083_c0_g1_i1|m.33830		Nuclear genome from Caulerpa lentillifera			Cale_scf_34	51.786	56	26	1	207	261	207376	207543	1.63e-08
Brhy	TRINITY_DN20083_c0_g1_i1|m.33830		Nuclear genome from Caulerpa lentillifera			Cale_scf_34	42.553	47	26	1	212	258	206937	207074	0.022
Brhy	TRINITY_DN20083_c0_g1_i1|m.33830		Nuclear genome from Caulerpa lentillifera			Cale_scf_63	32.5	40	27	0	170	209	2840	2959	2.7
Brhy	TRINITY_DN20147_c0_g1_i1|m.5646		Nuclear genome from Caulerpa lentillifera			Cale_scf_3	64.242	165	45	1	95	245	874438	874932	1.51e-78
Brhy	TRINITY_DN20147_c0_g1_i1|m.5646		Nuclear genome from Caulerpa lentillifera			Cale_scf_3	50.538	93	32	1	16	94	874115	874393	1.51e-78
Brhy	TRINITY_DN20147_c0_g1_i1|m.5646		Nuclear genome from Caulerpa lentillifera			Cale_scf_3	58.462	65	23	2	175	239	372441	372259	1.11e-30
Brhy	TRINITY_DN20147_c0_g1_i1|m.5646		Nuclear genome from Caulerpa lentillifera			Cale_scf_3	34.483	116	55	3	45	145	372848	372519	1.11e-30
Brhy	TRINITY_DN20147_c0_g1_i1|m.5646		Nuclear genome from Caulerpa lentillifera			Cale_scf_3	33.333	51	33	1	1	50	373030	372878	1.11e-30
Brhy	TRINITY_DN20147_c0_g1_i1|m.5646		Nuclear genome from Caulerpa lentillifera			Cale_scf_3	62.162	74	26	2	158	229	963372	963593	4.85e-20
Brhy	TRINITY_DN20147_c0_g1_i1|m.5646		Nuclear genome from Caulerpa lentillifera			Cale_scf_3	48.571	70	34	2	43	110	962867	963076	6.89e-14
Brhy	TRINITY_DN20147_c0_g1_i1|m.5646		Nuclear genome from Caulerpa lentillifera			Cale_scf_3	31.818	44	30	0	56	99	963426	963557	2.3
Brhy	TRINITY_DN20147_c0_g1_i1|m.5646		Nuclear genome from Caulerpa lentillifera			Cale_scf_34	55.172	116	52	0	6	121	206787	207134	2.14e-67
Brhy	TRINITY_DN20147_c0_g1_i1|m.5646		Nuclear genome from Caulerpa lentillifera			Cale_scf_34	56.667	90	36	2	158	244	207340	207609	2.14e-67
Brhy	TRINITY_DN20147_c0_g1_i1|m.5646		Nuclear genome from Caulerpa lentillifera			Cale_scf_34	57.447	47	19	1	119	165	207176	207313	2.14e-67
Brhy	TRINITY_DN20147_c0_g1_i1|m.5646		Nuclear genome from Caulerpa lentillifera			Cale_scf_4	62	100	38	0	22	121	1220547	1220846	1.44e-66
Brhy	TRINITY_DN20147_c0_g1_i1|m.5646		Nuclear genome from Caulerpa lentillifera			Cale_scf_4	55.556	90	37	2	158	244	1221052	1221321	1.44e-66
Brhy	TRINITY_DN20147_c0_g1_i1|m.5646		Nuclear genome from Caulerpa lentillifera			Cale_scf_4	55.319	47	20	1	119	165	1220888	1221025	1.44e-66
Brhy	TRINITY_DN20147_c0_g1_i1|m.5646		Nuclear genome from Caulerpa lentillifera			Cale_scf_4	37.864	103	40	4	119	217	1022378	1022130	5.81e-09
Brhy	TRINITY_DN20147_c0_g1_i1|m.5646		Nuclear genome from Caulerpa lentillifera			Cale_scf_4	32.927	82	43	2	1	70	1022980	1022735	0.027
Brhy	TRINITY_DN20147_c0_g1_i1|m.5646		Nuclear genome from Caulerpa lentillifera			Cale_scf_4	39.13	46	27	1	56	100	1022264	1022127	0.041
Brhy	TRINITY_DN20147_c0_g1_i1|m.5646		Nuclear genome from Caulerpa lentillifera			Cale_scf_6	45.128	195	83	5	53	243	185563	185039	2.55e-42
Brhy	TRINITY_DN20147_c0_g1_i1|m.5646		Nuclear genome from Caulerpa lentillifera			Cale_scf_5	38.29	269	123	7	1	244	188661	189413	5.29e-42
Brhy	TRINITY_DN20147_c0_g1_i1|m.5646		Nuclear genome from Caulerpa lentillifera			Cale_scf_5	40.67	209	103	7	45	236	441777	441163	2.05e-32
Brhy	TRINITY_DN20147_c0_g1_i1|m.5646		Nuclear genome from Caulerpa lentillifera			Cale_scf_7	44.86	214	92	9	44	237	323861	324484	3.88e-41
Brhy	TRINITY_DN20147_c0_g1_i1|m.5646		Nuclear genome from Caulerpa lentillifera			Cale_scf_7	29.545	44	31	0	132	175	936875	936744	2
Brhy	TRINITY_DN20147_c0_g1_i1|m.5646		Nuclear genome from Caulerpa lentillifera			Cale_scf_2	37.918	269	123	8	2	244	1132403	1131651	3.44e-40
Brhy	TRINITY_DN20147_c0_g1_i1|m.5646		Nuclear genome from Caulerpa lentillifera			Cale_scf_2	40.476	210	104	7	44	236	747726	748343	1.08e-35
Brhy	TRINITY_DN20147_c0_g1_i1|m.5646		Nuclear genome from Caulerpa lentillifera			Cale_scf_15	38.532	218	100	5	43	244	510107	509508	2.75e-36
Brhy	TRINITY_DN20147_c0_g1_i1|m.5646		Nuclear genome from Caulerpa lentillifera			Cale_scf_24	38.532	218	100	5	43	244	434493	435092	4.24e-36
Brhy	TRINITY_DN20147_c0_g1_i1|m.5646		Nuclear genome from Caulerpa lentillifera			Cale_scf_14	36.522	230	129	7	15	242	765339	764695	2.73e-35
Brhy	TRINITY_DN20147_c0_g1_i1|m.5646		Nuclear genome from Caulerpa lentillifera			Cale_scf_10	38.725	204	90	6	43	229	612758	613315	1.95e-34
Brhy	TRINITY_DN20147_c0_g1_i1|m.5646		Nuclear genome from Caulerpa lentillifera			Cale_scf_10	27.273	77	56	0	23	99	613049	613279	1.1
Brhy	TRINITY_DN20147_c0_g1_i1|m.5646		Nuclear genome from Caulerpa lentillifera			Cale_scf_17	38.318	214	94	7	43	240	25891	25316	2.46e-34
Brhy	TRINITY_DN20147_c0_g1_i1|m.5646		Nuclear genome from Caulerpa lentillifera			Cale_scf_21	38.318	214	94	7	43	240	36890	36315	2.79e-34
Brhy	TRINITY_DN20147_c0_g1_i1|m.5646		Nuclear genome from Caulerpa lentillifera			Cale_scf_23	35.526	228	129	7	16	242	456642	457274	3.93e-33
Brhy	TRINITY_DN20147_c0_g1_i1|m.5646		Nuclear genome from Caulerpa lentillifera			Cale_scf_13	35.622	233	127	9	24	233	523414	524112	8.94e-31
Brhy	TRINITY_DN20147_c0_g1_i1|m.5646		Nuclear genome from Caulerpa lentillifera			Cale_scf_26	48.182	110	37	3	122	229	223387	223662	3.05e-20
Brhy	TRINITY_DN20147_c0_g1_i1|m.5646		Nuclear genome from Caulerpa lentillifera			Cale_scf_26	47.887	71	35	2	43	111	222926	223138	7.15e-14
Brhy	TRINITY_DN20147_c0_g1_i1|m.5646		Nuclear genome from Caulerpa lentillifera			Cale_scf_26	31.818	44	30	0	56	99	223495	223626	2.3
Brhy	TRINITY_DN20147_c0_g1_i1|m.5646		Nuclear genome from Caulerpa lentillifera			Cale_scf_19	27.132	258	94	9	29	217	25486	26184	1.3e-14
Brhy	TRINITY_DN20147_c0_g1_i1|m.5646		Nuclear genome from Caulerpa lentillifera			Cale_scf_19	39.13	46	27	1	56	100	26050	26187	0.03
Brhy	TRINITY_DN20147_c0_g1_i1|m.5646		Nuclear genome from Caulerpa lentillifera			Cale_scf_29	22.826	92	58	3	100	178	391056	391331	0.26
Brhy	TRINITY_DN20147_c0_g1_i1|m.5646		Nuclear genome from Caulerpa lentillifera			Cale_scf_29	45.455	22	12	0	22	43	15739	15674	6.1
Brhy	TRINITY_DN20147_c0_g1_i1|m.5646		Nuclear genome from Caulerpa lentillifera			Cale_scf_12	36.957	46	27	1	183	228	375408	375539	5.7
Brhy	TRINITY_DN20187_c0_g1_i1|m.5577		Nuclear genome from Caulerpa lentillifera			Cale_scf_1	64.901	151	33	2	103	237	600953	601393	5.39e-61
Brhy	TRINITY_DN20187_c0_g1_i1|m.5577		Nuclear genome from Caulerpa lentillifera			Cale_scf_1	68.182	44	14	0	62	105	600769	600900	5.39e-61
Brhy	TRINITY_DN20187_c0_g1_i1|m.5577		Nuclear genome from Caulerpa lentillifera			Cale_scf_15	43.478	23	13	0	121	143	122341	122409	0.56
Brhy	TRINITY_DN20187_c0_g1_i1|m.5577		Nuclear genome from Caulerpa lentillifera			Cale_scf_26	32.143	28	19	0	195	222	288098	288015	8.9
Brhy	TRINITY_DN20328_c0_g1_i1|m.9504		Nuclear genome from Caulerpa lentillifera			Cale_scf_13	57.642	229	95	2	1	227	820876	821562	1.06e-74
Brhy	TRINITY_DN20328_c0_g1_i1|m.9504		Nuclear genome from Caulerpa lentillifera			Cale_scf_1	44.828	58	30	2	153	208	760124	759951	5.11e-07
Brhy	TRINITY_DN20328_c0_g1_i1|m.9504		Nuclear genome from Caulerpa lentillifera			Cale_scf_4	46.667	30	14	1	186	213	127005	127094	8.5
Brhy	TRINITY_DN20330_c0_g1_i1|m.9442		Nuclear genome from Caulerpa lentillifera			Cale_scf_19	60.784	51	19	1	113	162	536924	536772	2.93e-13
Brhy	TRINITY_DN20330_c0_g1_i1|m.9442		Nuclear genome from Caulerpa lentillifera			Cale_scf_19	80.952	21	4	0	1	21	536852	536790	8.13e-05
Brhy	TRINITY_DN20330_c0_g1_i1|m.9442		Nuclear genome from Caulerpa lentillifera			Cale_scf_19	68.75	16	5	0	77	92	536831	536784	3.4
Brhy	TRINITY_DN20330_c0_g1_i1|m.9442		Nuclear genome from Caulerpa lentillifera			Cale_scf_4	55.319	47	21	0	113	159	446642	446782	1.02e-11
Brhy	TRINITY_DN20330_c0_g1_i1|m.9442		Nuclear genome from Caulerpa lentillifera			Cale_scf_4	60	30	9	1	1	27	446714	446803	0.000156
Brhy	TRINITY_DN20330_c0_g1_i1|m.9442		Nuclear genome from Caulerpa lentillifera			Cale_scf_4	56.522	23	6	1	77	95	446735	446803	4
Brhy	TRINITY_DN20330_c0_g1_i1|m.9442		Nuclear genome from Caulerpa lentillifera			Cale_scf_3	43.478	23	13	0	2	24	972145	972213	8.3
Brhy	TRINITY_DN20330_c0_g1_i1|m.9442		Nuclear genome from Caulerpa lentillifera			Cale_scf_3	43.478	23	13	0	138	160	972145	972213	8.3
Brhy	TRINITY_DN20330_c0_g2_i1|m.9443		Nuclear genome from Caulerpa lentillifera			Cale_scf_19	62.222	45	17	0	113	157	536924	536790	7.56e-12
Brhy	TRINITY_DN20330_c0_g2_i1|m.9443		Nuclear genome from Caulerpa lentillifera			Cale_scf_19	54.839	31	14	0	249	279	536924	536832	0.000222
Brhy	TRINITY_DN20330_c0_g2_i1|m.9443		Nuclear genome from Caulerpa lentillifera			Cale_scf_19	80.952	21	4	0	1	21	536852	536790	0.000383
Brhy	TRINITY_DN20330_c0_g2_i1|m.9443		Nuclear genome from Caulerpa lentillifera			Cale_scf_19	68.75	16	5	0	77	92	536831	536784	8.1
Brhy	TRINITY_DN20330_c0_g2_i1|m.9443		Nuclear genome from Caulerpa lentillifera			Cale_scf_19	68.75	16	5	0	213	228	536831	536784	8.1
Brhy	TRINITY_DN20330_c0_g2_i1|m.9443		Nuclear genome from Caulerpa lentillifera			Cale_scf_4	51.852	54	23	1	113	163	446642	446803	1.12e-10
Brhy	TRINITY_DN20330_c0_g2_i1|m.9443		Nuclear genome from Caulerpa lentillifera			Cale_scf_4	60	30	9	1	1	27	446714	446803	0.000715
Brhy	TRINITY_DN20330_c0_g2_i1|m.9443		Nuclear genome from Caulerpa lentillifera			Cale_scf_4	51.613	31	15	0	249	279	446642	446734	0.002
Brhy	TRINITY_DN20330_c0_g3_i1|m.9446		Nuclear genome from Caulerpa lentillifera			Cale_scf_19	66.667	48	16	0	66	113	536921	536778	1.45e-05
Brhy	TRINITY_DN20330_c0_g3_i1|m.9446		Nuclear genome from Caulerpa lentillifera			Cale_scf_19	54.839	31	14	0	201	231	536924	536832	0.000197
Brhy	TRINITY_DN20330_c0_g3_i1|m.9446		Nuclear genome from Caulerpa lentillifera			Cale_scf_19	68.75	16	5	0	165	180	536831	536784	6
Brhy	TRINITY_DN20330_c0_g3_i1|m.9446		Nuclear genome from Caulerpa lentillifera			Cale_scf_4	60	30	9	1	89	115	446714	446803	0.000635
Brhy	TRINITY_DN20330_c0_g3_i1|m.9446		Nuclear genome from Caulerpa lentillifera			Cale_scf_4	51.613	31	15	0	201	231	446642	446734	0.002
Brhy	TRINITY_DN20330_c0_g3_i1|m.9446		Nuclear genome from Caulerpa lentillifera			Cale_scf_4	66.667	15	5	0	165	179	446735	446779	9
Brhy	TRINITY_DN20336_c0_g1_i1|m.9554		Nuclear genome from Caulerpa lentillifera			Cale_scf_10	60.345	116	46	0	132	247	631311	631658	6.76e-42
Brhy	TRINITY_DN20336_c0_g1_i1|m.9554		Nuclear genome from Caulerpa lentillifera			Cale_scf_10	44.681	94	50	2	52	144	631031	631309	1.27e-13
Brhy	TRINITY_DN20336_c0_g1_i1|m.9554		Nuclear genome from Caulerpa lentillifera			Cale_scf_10	32.836	67	39	2	112	178	950925	951107	5.6
Brhy	TRINITY_DN20336_c0_g1_i1|m.9554		Nuclear genome from Caulerpa lentillifera			Cale_scf_1	30.058	173	96	7	98	247	458415	458927	5.29e-08
Brhy	TRINITY_DN20336_c0_g1_i1|m.9554		Nuclear genome from Caulerpa lentillifera			Cale_scf_1	32.203	59	40	0	189	247	426930	426754	0.000227
Brhy	TRINITY_DN20336_c0_g1_i1|m.9554		Nuclear genome from Caulerpa lentillifera			Cale_scf_3	28.814	59	37	2	152	205	480571	480747	0.75
Brhy	TRINITY_DN20336_c0_g1_i1|m.9554		Nuclear genome from Caulerpa lentillifera			Cale_scf_12	26.316	57	42	0	64	120	467380	467210	1.8
Brhy	TRINITY_DN20336_c0_g1_i1|m.9554		Nuclear genome from Caulerpa lentillifera			Cale_scf_2	35.294	51	30	1	128	175	484522	484674	5.1
Brhy	TRINITY_DN20336_c0_g1_i1|m.9554		Nuclear genome from Caulerpa lentillifera			Cale_scf_120	46.667	30	16	0	9	38	2025	2114	5.9
Brhy	TRINITY_DN20336_c0_g1_i1|m.9554		Nuclear genome from Caulerpa lentillifera			Cale_scf_25	30.882	68	44	2	115	181	586988	587185	7.2
Brhy	TRINITY_DN20336_c0_g1_i1|m.9554		Nuclear genome from Caulerpa lentillifera			Cale_scf_13	25	44	33	0	22	65	491499	491368	9.2
Brhy	TRINITY_DN20517_c0_g1_i1|m.51608		Nuclear genome from Caulerpa lentillifera			Cale_scf_14	59.155	355	112	4	113	434	847143	846079	7.97e-133
Brhy	TRINITY_DN20517_c0_g1_i1|m.51608		Nuclear genome from Caulerpa lentillifera			Cale_scf_12	28.977	176	88	6	120	259	352979	353503	8.58e-07
Brhy	TRINITY_DN20517_c0_g1_i1|m.51608		Nuclear genome from Caulerpa lentillifera			Cale_scf_22	30.769	78	53	1	120	197	387485	387255	0.000157
Brhy	TRINITY_DN20517_c0_g1_i1|m.51608		Nuclear genome from Caulerpa lentillifera			Cale_scf_1	22.807	228	143	7	120	319	1244016	1244684	0.000503
Brhy	TRINITY_DN20517_c0_g1_i1|m.51608		Nuclear genome from Caulerpa lentillifera			Cale_scf_1	32.258	62	35	1	273	334	367098	366934	0.7
Brhy	TRINITY_DN20517_c0_g1_i1|m.51608		Nuclear genome from Caulerpa lentillifera			Cale_scf_6	44.828	58	31	1	120	176	378835	378662	0.001
Brhy	TRINITY_DN20517_c0_g1_i1|m.51608		Nuclear genome from Caulerpa lentillifera			Cale_scf_6	27.941	68	41	2	200	259	378513	378310	3.6
Brhy	TRINITY_DN20517_c0_g1_i1|m.51608		Nuclear genome from Caulerpa lentillifera			Cale_scf_11	27.083	48	35	0	197	244	648314	648457	1.8
Brhy	TRINITY_DN20517_c0_g1_i1|m.51608		Nuclear genome from Caulerpa lentillifera			Cale_scf_17	34.884	43	27	1	179	221	419689	419564	3.9
Brhy	TRINITY_DN214_c1_g1_i1|m.18173		Nuclear genome from Caulerpa lentillifera			Cale_scf_20	64.069	231	77	3	72	302	644222	643548	2.61e-84
Brhy	TRINITY_DN214_c1_g1_i1|m.18173		Nuclear genome from Caulerpa lentillifera			Cale_scf_21	34.653	101	61	3	71	170	729650	729360	3.31e-08
Brhy	TRINITY_DN214_c1_g1_i1|m.18173		Nuclear genome from Caulerpa lentillifera			Cale_scf_21	57.576	33	14	0	265	297	729142	729044	0.000593
Brhy	TRINITY_DN214_c1_g1_i1|m.18173		Nuclear genome from Caulerpa lentillifera			Cale_scf_7	27.358	106	54	3	77	161	1002667	1002356	0.001
Brhy	TRINITY_DN214_c1_g1_i1|m.18173		Nuclear genome from Caulerpa lentillifera			Cale_scf_6	25.352	71	41	2	235	298	638399	638202	0.93
Brhy	TRINITY_DN214_c1_g1_i1|m.18173		Nuclear genome from Caulerpa lentillifera			Cale_scf_23	35.185	54	32	2	1	51	86986	87147	2.1
Brhy	TRINITY_DN214_c1_g1_i1|m.18173		Nuclear genome from Caulerpa lentillifera			Cale_scf_31	41.667	36	21	0	229	264	136296	136403	2.1
Brhy	TRINITY_DN214_c1_g1_i1|m.18173		Nuclear genome from Caulerpa lentillifera			Cale_scf_19	31.111	45	22	1	125	160	567646	567512	4
Brhy	TRINITY_DN22385_c0_g1_i1|m.8367		Nuclear genome from Caulerpa lentillifera			Cale_scf_4	69.369	111	34	0	25	135	1022848	1022516	6.87e-51
Brhy	TRINITY_DN22385_c0_g1_i1|m.8367		Nuclear genome from Caulerpa lentillifera			Cale_scf_4	27.358	106	33	1	27	132	1220586	1220771	4.92e-06
Brhy	TRINITY_DN22385_c0_g1_i1|m.8367		Nuclear genome from Caulerpa lentillifera			Cale_scf_4	50	28	14	0	106	133	1022219	1022136	0.08
Brhy	TRINITY_DN22385_c0_g1_i1|m.8367		Nuclear genome from Caulerpa lentillifera			Cale_scf_19	67.568	111	36	0	25	135	25498	25830	2.27e-49
Brhy	TRINITY_DN22385_c0_g1_i1|m.8367		Nuclear genome from Caulerpa lentillifera			Cale_scf_19	53.571	28	13	0	106	133	26095	26178	0.048
Brhy	TRINITY_DN22385_c0_g1_i1|m.8367		Nuclear genome from Caulerpa lentillifera			Cale_scf_26	52.5	40	17	1	92	131	222971	223084	4.83e-06
Brhy	TRINITY_DN22385_c0_g1_i1|m.8367		Nuclear genome from Caulerpa lentillifera			Cale_scf_34	27.358	106	33	1	27	132	206874	207059	4.92e-06
Brhy	TRINITY_DN22385_c0_g1_i1|m.8367		Nuclear genome from Caulerpa lentillifera			Cale_scf_3	52.5	40	17	1	92	131	962912	963025	5.07e-06
Brhy	TRINITY_DN22385_c0_g1_i1|m.8367		Nuclear genome from Caulerpa lentillifera			Cale_scf_3	48.276	29	14	1	107	135	372770	372687	0.08
Brhy	TRINITY_DN22385_c0_g1_i1|m.8367		Nuclear genome from Caulerpa lentillifera			Cale_scf_3	23.684	114	29	2	28	127	874175	874384	0.25
Brhy	TRINITY_DN22385_c0_g1_i1|m.8367		Nuclear genome from Caulerpa lentillifera			Cale_scf_3	56.25	16	7	0	27	42	372925	372878	8.7
Brhy	TRINITY_DN22385_c0_g1_i1|m.8367		Nuclear genome from Caulerpa lentillifera			Cale_scf_14	25.714	105	34	1	27	131	765279	765097	0.000118
Brhy	TRINITY_DN22385_c0_g1_i1|m.8367		Nuclear genome from Caulerpa lentillifera			Cale_scf_2	48.276	29	15	0	104	132	1132175	1132089	0.000186
Brhy	TRINITY_DN22385_c0_g1_i1|m.8367		Nuclear genome from Caulerpa lentillifera			Cale_scf_2	25.532	94	26	1	36	129	747726	747875	0.002
Brhy	TRINITY_DN22385_c0_g1_i1|m.8367		Nuclear genome from Caulerpa lentillifera			Cale_scf_24	48.276	29	15	0	104	132	434568	434654	0.000195
Brhy	TRINITY_DN22385_c0_g1_i1|m.8367		Nuclear genome from Caulerpa lentillifera			Cale_scf_15	51.852	27	13	0	106	132	510026	509946	0.000254
Brhy	TRINITY_DN22385_c0_g1_i1|m.8367		Nuclear genome from Caulerpa lentillifera			Cale_scf_5	48.276	29	15	0	104	132	188889	188975	0.000272
Brhy	TRINITY_DN22385_c0_g1_i1|m.8367		Nuclear genome from Caulerpa lentillifera			Cale_scf_5	24.731	93	26	1	37	129	441777	441631	0.001
Brhy	TRINITY_DN22385_c0_g1_i1|m.8367		Nuclear genome from Caulerpa lentillifera			Cale_scf_7	27.778	108	40	3	25	132	323828	324037	0.001
Brhy	TRINITY_DN22385_c0_g1_i1|m.8367		Nuclear genome from Caulerpa lentillifera			Cale_scf_17	57.692	26	11	0	104	129	25816	25739	0.001
Brhy	TRINITY_DN22385_c0_g1_i1|m.8367		Nuclear genome from Caulerpa lentillifera			Cale_scf_21	57.692	26	11	0	104	129	36815	36738	0.001
Brhy	TRINITY_DN22385_c0_g1_i1|m.8367		Nuclear genome from Caulerpa lentillifera			Cale_scf_23	24.762	105	35	1	27	131	456693	456875	0.002
Brhy	TRINITY_DN22385_c0_g1_i1|m.8367		Nuclear genome from Caulerpa lentillifera			Cale_scf_10	27.523	109	33	3	26	132	612725	612919	0.004
Brhy	TRINITY_DN22385_c0_g1_i1|m.8367		Nuclear genome from Caulerpa lentillifera			Cale_scf_13	44.828	29	16	0	104	132	523576	523662	0.009
Brhy	TRINITY_DN22385_c0_g1_i1|m.8367		Nuclear genome from Caulerpa lentillifera			Cale_scf_6	50	26	13	0	104	129	185518	185441	0.009
Brhy	TRINITY_DN22385_c0_g1_i1|m.8367		Nuclear genome from Caulerpa lentillifera			Cale_scf_18	37.5	32	20	0	103	134	437145	437050	2
Brhy	TRINITY_DN22385_c0_g1_i1|m.8367		Nuclear genome from Caulerpa lentillifera			Cale_scf_12	40.541	37	19	1	50	86	323841	323740	9.9
Brhy	TRINITY_DN230_c0_g1_i1|m.18060		Nuclear genome from Caulerpa lentillifera			Cale_scf_10	48.227	282	134	2	24	293	63861	63016	8.45e-82
Brhy	TRINITY_DN230_c0_g1_i1|m.18060		Nuclear genome from Caulerpa lentillifera			Cale_scf_23	35.526	76	35	4	110	178	304168	303962	1.8
Brhy	TRINITY_DN230_c0_g1_i1|m.18060		Nuclear genome from Caulerpa lentillifera			Cale_scf_12	40.426	47	27	1	223	268	81467	81607	2.8
Brhy	TRINITY_DN230_c0_g1_i1|m.18060		Nuclear genome from Caulerpa lentillifera			Cale_scf_22	28.125	32	23	0	139	170	101356	101261	7.1
Brhy	TRINITY_DN2322_c0_g1_i1|m.49283		Nuclear genome from Caulerpa lentillifera			Cale_scf_15	53.731	134	56	2	136	268	105469	105855	5.91e-68
Brhy	TRINITY_DN2322_c0_g1_i1|m.49283		Nuclear genome from Caulerpa lentillifera			Cale_scf_15	53.75	80	37	0	51	130	105176	105415	5.91e-68
Brhy	TRINITY_DN2322_c0_g1_i1|m.49283		Nuclear genome from Caulerpa lentillifera			Cale_scf_15	47.826	46	24	0	266	311	105891	106028	5.91e-68
Brhy	TRINITY_DN2322_c0_g1_i1|m.49283		Nuclear genome from Caulerpa lentillifera			Cale_scf_15	47.619	231	101	3	51	266	73545	74222	2.51e-65
Brhy	TRINITY_DN2322_c0_g1_i1|m.49283		Nuclear genome from Caulerpa lentillifera			Cale_scf_15	38.333	60	37	0	254	313	94286	94465	2.81e-07
Brhy	TRINITY_DN2322_c0_g1_i1|m.49283		Nuclear genome from Caulerpa lentillifera			Cale_scf_15	62.069	29	11	0	238	266	94194	94280	5.88e-05
Brhy	TRINITY_DN2322_c0_g1_i1|m.49283		Nuclear genome from Caulerpa lentillifera			Cale_scf_15	38.636	44	27	0	266	309	74264	74395	0.003
Brhy	TRINITY_DN2322_c0_g1_i1|m.49283		Nuclear genome from Caulerpa lentillifera			Cale_scf_11	34.066	91	41	4	202	281	250419	250171	0.000685
Brhy	TRINITY_DN2322_c0_g1_i1|m.49283		Nuclear genome from Caulerpa lentillifera			Cale_scf_11	35.185	54	35	0	29	82	251048	250887	0.026
Brhy	TRINITY_DN2322_c0_g1_i1|m.49283		Nuclear genome from Caulerpa lentillifera			Cale_scf_25	44.828	29	16	0	119	147	138629	138543	1.1
Brhy	TRINITY_DN2322_c0_g1_i1|m.49283		Nuclear genome from Caulerpa lentillifera			Cale_scf_22	23.81	63	46	2	243	304	507184	507369	2.5
Brhy	TRINITY_DN2322_c0_g1_i1|m.49283		Nuclear genome from Caulerpa lentillifera			Cale_scf_10	31.707	41	26	1	239	279	760584	760468	3.2
Brhy	TRINITY_DN2322_c0_g1_i1|m.49283		Nuclear genome from Caulerpa lentillifera			Cale_scf_42	35.714	28	18	0	189	216	6929	6846	4.9
Brhy	TRINITY_DN2379_c0_g1_i1|m.49472		Nuclear genome from Caulerpa lentillifera			Cale_scf_1	51.546	194	80	2	62	241	427570	426989	6.18e-55
Brhy	TRINITY_DN2379_c0_g1_i1|m.49472		Nuclear genome from Caulerpa lentillifera			Cale_scf_1	45.455	33	18	0	240	272	426948	426850	0.025
Brhy	TRINITY_DN2379_c0_g1_i1|m.49472		Nuclear genome from Caulerpa lentillifera			Cale_scf_19	27.869	61	38	1	130	190	707975	708139	5.6
Brhy	TRINITY_DN2379_c0_g1_i1|m.49472		Nuclear genome from Caulerpa lentillifera			Cale_scf_44	34.483	58	38	0	194	251	2234	2407	9.8
Brhy	TRINITY_DN2379_c0_g2_i1|m.49474		Nuclear genome from Caulerpa lentillifera			Cale_scf_1	51.546	194	80	2	62	241	427570	426989	7.46e-59
Brhy	TRINITY_DN2379_c0_g2_i1|m.49474		Nuclear genome from Caulerpa lentillifera			Cale_scf_1	41.379	58	34	0	249	306	426921	426748	7.46e-59
Brhy	TRINITY_DN2379_c0_g2_i1|m.49474		Nuclear genome from Caulerpa lentillifera			Cale_scf_1	26.23	61	42	1	233	290	458700	458882	0.93
Brhy	TRINITY_DN2379_c0_g2_i1|m.49474		Nuclear genome from Caulerpa lentillifera			Cale_scf_24	42.857	28	16	0	263	290	503136	503219	1.2
Brhy	TRINITY_DN2379_c0_g2_i1|m.49474		Nuclear genome from Caulerpa lentillifera			Cale_scf_19	27.869	61	38	1	130	190	707975	708139	7.7
Brhy	TRINITY_DN23826_c0_g1_i1|m.10436		Nuclear genome from Caulerpa lentillifera			Cale_scf_2	58.511	94	38	1	63	155	189959	189678	2.48e-29
Brhy	TRINITY_DN23826_c0_g1_i1|m.10436		Nuclear genome from Caulerpa lentillifera			Cale_scf_5	65.217	92	25	3	63	150	912689	912955	6e-29
Brhy	TRINITY_DN23826_c0_g1_i1|m.10436		Nuclear genome from Caulerpa lentillifera			Cale_scf_3	28.814	59	39	2	58	115	78402	78572	2.9
Brhy	TRINITY_DN23833_c0_g1_i1|m.10470		Nuclear genome from Caulerpa lentillifera			Cale_scf_10	44.298	228	119	3	109	336	612701	613360	1.04e-50
Brhy	TRINITY_DN23833_c0_g1_i1|m.10470		Nuclear genome from Caulerpa lentillifera			Cale_scf_5	44.493	227	116	5	110	335	188757	189410	6.19e-48
Brhy	TRINITY_DN23833_c0_g1_i1|m.10470		Nuclear genome from Caulerpa lentillifera			Cale_scf_5	37.273	220	110	4	130	332	441777	441151	2.05e-31
Brhy	TRINITY_DN23833_c0_g1_i1|m.10470		Nuclear genome from Caulerpa lentillifera			Cale_scf_2	44.493	227	116	5	110	335	1132307	1131654	9.79e-48
Brhy	TRINITY_DN23833_c0_g1_i1|m.10470		Nuclear genome from Caulerpa lentillifera			Cale_scf_2	37.238	239	129	7	107	330	747651	748349	8.66e-34
Brhy	TRINITY_DN23833_c0_g1_i1|m.10470		Nuclear genome from Caulerpa lentillifera			Cale_scf_15	44.493	227	116	5	110	335	510164	509511	1.26e-47
Brhy	TRINITY_DN23833_c0_g1_i1|m.10470		Nuclear genome from Caulerpa lentillifera			Cale_scf_24	44.493	227	116	5	110	335	434436	435089	1.41e-47
Brhy	TRINITY_DN23833_c0_g1_i1|m.10470		Nuclear genome from Caulerpa lentillifera			Cale_scf_13	41.453	234	117	5	109	329	523444	524124	2.8e-46
Brhy	TRINITY_DN23833_c0_g1_i1|m.10470		Nuclear genome from Caulerpa lentillifera			Cale_scf_17	42.5	240	119	6	107	336	25984	25292	7.63e-46
Brhy	TRINITY_DN23833_c0_g1_i1|m.10470		Nuclear genome from Caulerpa lentillifera			Cale_scf_21	44.24	217	111	5	121	336	36914	36291	9.92e-44
Brhy	TRINITY_DN23833_c0_g1_i1|m.10470		Nuclear genome from Caulerpa lentillifera			Cale_scf_3	45.378	119	63	2	110	227	962810	963163	6.05e-25
Brhy	TRINITY_DN23833_c0_g1_i1|m.10470		Nuclear genome from Caulerpa lentillifera			Cale_scf_3	54.167	72	32	1	257	328	963402	963614	5.02e-15
Brhy	TRINITY_DN23833_c0_g1_i1|m.10470		Nuclear genome from Caulerpa lentillifera			Cale_scf_3	43.529	85	34	2	257	328	874654	874905	1.87e-12
Brhy	TRINITY_DN23833_c0_g1_i1|m.10470		Nuclear genome from Caulerpa lentillifera			Cale_scf_3	49.206	63	27	1	266	328	372441	372268	3.27e-11
Brhy	TRINITY_DN23833_c0_g1_i1|m.10470		Nuclear genome from Caulerpa lentillifera			Cale_scf_3	37.5	88	39	2	115	188	874163	874420	3.51e-09
Brhy	TRINITY_DN23833_c0_g1_i1|m.10470		Nuclear genome from Caulerpa lentillifera			Cale_scf_3	45.098	51	28	0	130	180	372848	372696	3.93e-06
Brhy	TRINITY_DN23833_c0_g1_i1|m.10470		Nuclear genome from Caulerpa lentillifera			Cale_scf_3	38.776	49	30	0	261	309	874262	874408	0.002
Brhy	TRINITY_DN23833_c0_g1_i1|m.10470		Nuclear genome from Caulerpa lentillifera			Cale_scf_3	30.12	83	56	1	230	312	962804	963046	0.088
Brhy	TRINITY_DN23833_c0_g1_i1|m.10470		Nuclear genome from Caulerpa lentillifera			Cale_scf_26	45.378	119	63	2	110	227	222869	223222	9.12e-25
Brhy	TRINITY_DN23833_c0_g1_i1|m.10470		Nuclear genome from Caulerpa lentillifera			Cale_scf_26	54.167	72	32	1	257	328	223471	223683	5.02e-15
Brhy	TRINITY_DN23833_c0_g1_i1|m.10470		Nuclear genome from Caulerpa lentillifera			Cale_scf_26	30.12	83	56	1	230	312	222863	223105	0.14
Brhy	TRINITY_DN23833_c0_g1_i1|m.10470		Nuclear genome from Caulerpa lentillifera			Cale_scf_6	36.126	191	99	5	138	328	185563	185060	1.03e-24
Brhy	TRINITY_DN23833_c0_g1_i1|m.10470		Nuclear genome from Caulerpa lentillifera			Cale_scf_7	33.632	223	119	6	124	328	323846	324481	9.78e-23
Brhy	TRINITY_DN23833_c0_g1_i1|m.10470		Nuclear genome from Caulerpa lentillifera			Cale_scf_23	34.978	223	106	6	114	328	456681	457256	5.78e-22
Brhy	TRINITY_DN23833_c0_g1_i1|m.10470		Nuclear genome from Caulerpa lentillifera			Cale_scf_14	33.645	214	120	6	115	328	765288	764713	6.05e-21
Brhy	TRINITY_DN23833_c0_g1_i1|m.10470		Nuclear genome from Caulerpa lentillifera			Cale_scf_4	48.75	80	40	1	260	338	1221088	1221327	1.38e-14
Brhy	TRINITY_DN23833_c0_g1_i1|m.10470		Nuclear genome from Caulerpa lentillifera			Cale_scf_4	38.182	110	52	5	198	306	1022423	1022139	2.72e-12
Brhy	TRINITY_DN23833_c0_g1_i1|m.10470		Nuclear genome from Caulerpa lentillifera			Cale_scf_4	35.616	73	38	2	120	185	1022731	1022519	2.72e-12
Brhy	TRINITY_DN23833_c0_g1_i1|m.10470		Nuclear genome from Caulerpa lentillifera			Cale_scf_4	34.021	97	60	2	112	208	1220568	1220846	8.92e-12
Brhy	TRINITY_DN23833_c0_g1_i1|m.10470		Nuclear genome from Caulerpa lentillifera			Cale_scf_4	36.667	60	35	1	248	307	1220604	1220774	0.011
Brhy	TRINITY_DN23833_c0_g1_i1|m.10470		Nuclear genome from Caulerpa lentillifera			Cale_scf_34	48.75	80	40	1	260	338	207376	207615	1.97e-14
Brhy	TRINITY_DN23833_c0_g1_i1|m.10470		Nuclear genome from Caulerpa lentillifera			Cale_scf_34	38.372	86	49	2	112	197	206856	207101	1.61e-11
Brhy	TRINITY_DN23833_c0_g1_i1|m.10470		Nuclear genome from Caulerpa lentillifera			Cale_scf_34	36.667	60	35	1	248	307	206892	207062	0.011
Brhy	TRINITY_DN23833_c0_g1_i1|m.10470		Nuclear genome from Caulerpa lentillifera			Cale_scf_19	33.816	207	97	9	120	306	25615	26175	2.09e-14
Brhy	TRINITY_DN23833_c0_g1_i1|m.10470		Nuclear genome from Caulerpa lentillifera			Cale_scf_41	37.209	43	20	1	190	225	9198	9070	1.2
Brhy	TRINITY_DN23833_c0_g1_i1|m.10470		Nuclear genome from Caulerpa lentillifera			Cale_scf_130	30.534	131	77	4	140	260	723	343	4.7
Brhy	TRINITY_DN23833_c0_g1_i1|m.10470		Nuclear genome from Caulerpa lentillifera			Cale_scf_35	38.71	31	19	0	228	258	102371	102463	7.3
Brhy	TRINITY_DN23884_c0_g1_i1|m.10360		Nuclear genome from Caulerpa lentillifera			Cale_scf_33	78.797	316	67	0	69	384	60632	59685	4.1e-174
Brhy	TRINITY_DN23884_c0_g1_i1|m.10360		Nuclear genome from Caulerpa lentillifera			Cale_scf_13	71.118	322	93	0	63	384	129543	128578	3.56e-162
Brhy	TRINITY_DN23884_c0_g1_i1|m.10360		Nuclear genome from Caulerpa lentillifera			Cale_scf_4	30.417	240	139	11	156	384	1069177	1069845	5.55e-13
Brhy	TRINITY_DN23884_c0_g1_i1|m.10360		Nuclear genome from Caulerpa lentillifera			Cale_scf_6	26.522	230	131	8	155	362	603954	603313	6.91e-09
Brhy	TRINITY_DN23884_c0_g1_i1|m.10360		Nuclear genome from Caulerpa lentillifera			Cale_scf_6	29.268	41	29	0	85	125	55946	55824	9.2
Brhy	TRINITY_DN23884_c0_g1_i1|m.10360		Nuclear genome from Caulerpa lentillifera			Cale_scf_19	21.739	161	115	5	199	357	98256	98711	0.006
Brhy	TRINITY_DN23884_c0_g1_i1|m.10360		Nuclear genome from Caulerpa lentillifera			Cale_scf_406	34.375	32	21	0	133	164	19	114	2.8
Brhy	TRINITY_DN23884_c0_g1_i1|m.10360		Nuclear genome from Caulerpa lentillifera			Cale_scf_37	41.667	48	26	1	35	80	19311	19168	4.3
Brhy	TRINITY_DN23884_c0_g1_i1|m.10360		Nuclear genome from Caulerpa lentillifera			Cale_scf_45	28.09	89	58	2	170	252	37407	37141	5.9
Brhy	TRINITY_DN23884_c0_g1_i1|m.10360		Nuclear genome from Caulerpa lentillifera			Cale_scf_28	28.571	77	50	2	234	307	311228	311004	6
Brhy	TRINITY_DN23884_c0_g1_i1|m.10360		Nuclear genome from Caulerpa lentillifera			Cale_scf_318	63.158	19	7	0	44	62	106	50	9.1
Brhy	TRINITY_DN23994_c0_g1_i1|m.3984		Nuclear genome from Caulerpa lentillifera			Cale_scf_1	58.768	211	85	2	91	299	458301	458933	3.39e-74
Brhy	TRINITY_DN23994_c0_g1_i1|m.3984		Nuclear genome from Caulerpa lentillifera			Cale_scf_24	60.87	69	27	0	159	227	502798	503004	3.16e-50
Brhy	TRINITY_DN23994_c0_g1_i1|m.3984		Nuclear genome from Caulerpa lentillifera			Cale_scf_24	72.222	54	15	0	246	299	503109	503270	3.16e-50
Brhy	TRINITY_DN23994_c0_g1_i1|m.3984		Nuclear genome from Caulerpa lentillifera			Cale_scf_24	55.172	87	22	2	91	160	502500	502760	3.16e-50
Brhy	TRINITY_DN23994_c0_g1_i1|m.3984		Nuclear genome from Caulerpa lentillifera			Cale_scf_10	24.107	112	67	3	173	284	631341	631622	2.9
Brhy	TRINITY_DN23994_c0_g1_i1|m.3984		Nuclear genome from Caulerpa lentillifera			Cale_scf_21	39.394	33	20	0	223	255	496288	496386	9.1
Brhy	TRINITY_DN24082_c0_g1_i1|m.43185		Nuclear genome from Caulerpa lentillifera			Cale_scf_22	48.507	134	53	2	65	182	534402	534001	6.92e-27
Brhy	TRINITY_DN24082_c0_g1_i1|m.43185		Nuclear genome from Caulerpa lentillifera			Cale_scf_8	74.242	66	17	0	117	182	579961	579764	5.31e-26
Brhy	TRINITY_DN24082_c0_g1_i1|m.43185		Nuclear genome from Caulerpa lentillifera			Cale_scf_4	39.13	46	27	1	32	77	771999	772133	0.004
Brhy	TRINITY_DN24082_c0_g1_i1|m.43185		Nuclear genome from Caulerpa lentillifera			Cale_scf_7	40	30	18	0	140	169	40578	40489	4.4
Brhy	TRINITY_DN24082_c0_g1_i1|m.43185		Nuclear genome from Caulerpa lentillifera			Cale_scf_1	32.5	40	21	1	156	195	651244	651143	6.3
Brhy	TRINITY_DN24330_c0_g1_i1|m.35853		Nuclear genome from Caulerpa lentillifera			Cale_scf_17	65.909	132	44	1	73	204	424772	424380	7.01e-52
Brhy	TRINITY_DN24336_c0_g1_i1|m.35884		Nuclear genome from Caulerpa lentillifera			Cale_scf_2	38.372	172	54	4	109	231	166773	167279	2.96e-30
Brhy	TRINITY_DN24336_c0_g1_i1|m.35884		Nuclear genome from Caulerpa lentillifera			Cale_scf_2	41.818	55	29	1	36	90	166517	166672	2.96e-30
Brhy	TRINITY_DN24336_c0_g1_i1|m.35884		Nuclear genome from Caulerpa lentillifera			Cale_scf_2	57.692	26	11	0	232	257	167329	167406	2.96e-30
Brhy	TRINITY_DN24336_c0_g1_i1|m.35884		Nuclear genome from Caulerpa lentillifera			Cale_scf_21	33.333	72	31	4	154	220	55508	55687	1
Brhy	TRINITY_DN24336_c0_g1_i1|m.35884		Nuclear genome from Caulerpa lentillifera			Cale_scf_11	31.25	32	22	0	17	48	13865	13770	4.9
Brhy	TRINITY_DN24336_c0_g1_i1|m.35884		Nuclear genome from Caulerpa lentillifera			Cale_scf_15	26.531	49	34	1	181	229	789968	790108	7.9
Brhy	TRINITY_DN24660_c0_g1_i1|m.27815		Nuclear genome from Caulerpa lentillifera			Cale_scf_16	70	50	13	1	111	158	383754	383605	5.75e-15
Brhy	TRINITY_DN24660_c0_g1_i1|m.27815		Nuclear genome from Caulerpa lentillifera			Cale_scf_28	30.303	66	45	1	1	66	222890	223084	1
Brhy	TRINITY_DN24660_c0_g1_i1|m.27815		Nuclear genome from Caulerpa lentillifera			Cale_scf_13	30.233	43	25	1	7	49	580601	580488	3.2
Brhy	TRINITY_DN24660_c0_g1_i1|m.27815		Nuclear genome from Caulerpa lentillifera			Cale_scf_13	27.083	48	30	1	8	55	423386	423258	5.1
Brhy	TRINITY_DN24660_c0_g1_i1|m.27815		Nuclear genome from Caulerpa lentillifera			Cale_scf_11	30.233	43	25	1	7	49	739673	739560	3.4
Brhy	TRINITY_DN24660_c0_g1_i1|m.27815		Nuclear genome from Caulerpa lentillifera			Cale_scf_21	48	25	13	0	12	36	16581	16507	4.4
Brhy	TRINITY_DN24660_c0_g1_i1|m.27815		Nuclear genome from Caulerpa lentillifera			Cale_scf_20	33.333	36	24	0	2	37	584877	584770	9.1
Brhy	TRINITY_DN2524_c0_g1_i1|m.19259		Nuclear genome from Caulerpa lentillifera			Cale_scf_20	51.955	179	53	2	38	183	510882	511418	4.55e-57
Brhy	TRINITY_DN2524_c0_g1_i1|m.19259		Nuclear genome from Caulerpa lentillifera			Cale_scf_72	63.889	108	39	0	55	162	5373	5696	5.36e-46
Brhy	TRINITY_DN2524_c0_g1_i1|m.19259		Nuclear genome from Caulerpa lentillifera			Cale_scf_72	60.87	23	9	0	161	183	5744	5812	0.007
Brhy	TRINITY_DN2524_c0_g1_i1|m.19259		Nuclear genome from Caulerpa lentillifera			Cale_scf_72	61.111	18	7	0	38	55	5275	5328	1.4
Brhy	TRINITY_DN2524_c0_g1_i1|m.19259		Nuclear genome from Caulerpa lentillifera			Cale_scf_12	31.111	45	29	1	103	147	524277	524149	5.2
Brhy	TRINITY_DN2524_c0_g1_i1|m.19259		Nuclear genome from Caulerpa lentillifera			Cale_scf_32	39.286	28	17	0	62	89	74168	74251	5.4
Brhy	TRINITY_DN2524_c0_g1_i1|m.19259		Nuclear genome from Caulerpa lentillifera			Cale_scf_32	39.286	28	17	0	62	89	103487	103570	5.4
Brhy	TRINITY_DN2551_c0_g1_i1|m.19119		Nuclear genome from Caulerpa lentillifera			Cale_scf_5	61.29	31	12	0	58	88	514649	514557	1.71e-09
Brhy	TRINITY_DN2551_c0_g1_i1|m.19119		Nuclear genome from Caulerpa lentillifera			Cale_scf_5	53.333	30	13	1	89	117	514512	514423	1.71e-09
Brhy	TRINITY_DN2551_c0_g1_i1|m.19119		Nuclear genome from Caulerpa lentillifera			Cale_scf_120	43.902	41	16	1	2	42	2112	2213	0.068
Brhy	TRINITY_DN2551_c0_g1_i1|m.19119		Nuclear genome from Caulerpa lentillifera			Cale_scf_3	27.692	65	41	2	44	107	1005484	1005305	5.9
Brhy	TRINITY_DN2551_c0_g1_i1|m.19119		Nuclear genome from Caulerpa lentillifera			Cale_scf_20	52.381	21	10	0	84	104	55110	55172	7
Brhy	TRINITY_DN2551_c0_g1_i1|m.19119		Nuclear genome from Caulerpa lentillifera			Cale_scf_20	23.636	55	42	0	29	83	679122	678958	8.6
Brhy	TRINITY_DN2551_c0_g2_i1|m.19121		Nuclear genome from Caulerpa lentillifera			Cale_scf_5	66.667	27	9	0	77	103	514637	514557	1.79e-08
Brhy	TRINITY_DN2551_c0_g2_i1|m.19121		Nuclear genome from Caulerpa lentillifera			Cale_scf_5	53.333	30	13	1	104	132	514512	514423	1.79e-08
Brhy	TRINITY_DN2551_c0_g2_i1|m.19121		Nuclear genome from Caulerpa lentillifera			Cale_scf_120	43.902	41	16	1	2	42	2112	2213	0.1
Brhy	TRINITY_DN2551_c0_g2_i1|m.19121		Nuclear genome from Caulerpa lentillifera			Cale_scf_31	28.571	56	39	1	38	92	159379	159212	2.7
Brhy	TRINITY_DN2551_c0_g2_i1|m.19121		Nuclear genome from Caulerpa lentillifera			Cale_scf_20	52.381	21	10	0	99	119	55110	55172	9.8
Brhy	TRINITY_DN2631_c0_g1_i1|m.41720		Nuclear genome from Caulerpa lentillifera			Cale_scf_18	53.333	135	45	1	1	117	794037	793633	5.56e-35
Brhy	TRINITY_DN2631_c0_g1_i1|m.41720		Nuclear genome from Caulerpa lentillifera			Cale_scf_28	57.353	68	29	0	1	68	335267	335064	5.63e-29
Brhy	TRINITY_DN2631_c0_g1_i1|m.41720		Nuclear genome from Caulerpa lentillifera			Cale_scf_28	62	50	19	0	68	117	335019	334870	5.63e-29
Brhy	TRINITY_DN27786_c0_g1_i1|m.16489		Nuclear genome from Caulerpa lentillifera			Cale_scf_15	74.138	290	74	1	446	735	269375	270241	1.52e-133
Brhy	TRINITY_DN27786_c0_g1_i1|m.16489		Nuclear genome from Caulerpa lentillifera			Cale_scf_15	67.317	205	67	0	188	392	268613	269227	2.01e-116
Brhy	TRINITY_DN27786_c0_g1_i1|m.16489		Nuclear genome from Caulerpa lentillifera			Cale_scf_15	70	120	36	0	71	190	268207	268566	2.01e-116
Brhy	TRINITY_DN27786_c0_g1_i1|m.16489		Nuclear genome from Caulerpa lentillifera			Cale_scf_4	32.258	186	126	0	202	387	389189	389746	5.04e-32
Brhy	TRINITY_DN27786_c0_g1_i1|m.16489		Nuclear genome from Caulerpa lentillifera			Cale_scf_4	55.882	34	15	0	168	201	389043	389144	5.04e-32
Brhy	TRINITY_DN27786_c0_g1_i1|m.16489		Nuclear genome from Caulerpa lentillifera			Cale_scf_4	33.962	53	34	1	117	168	388834	388992	5.04e-32
Brhy	TRINITY_DN27786_c0_g1_i1|m.16489		Nuclear genome from Caulerpa lentillifera			Cale_scf_4	40	60	32	1	76	135	388664	388831	0.000235
Brhy	TRINITY_DN27786_c0_g1_i1|m.16489		Nuclear genome from Caulerpa lentillifera			Cale_scf_42	31.624	117	66	4	164	272	56823	56491	0.018
Brhy	TRINITY_DN27786_c0_g1_i1|m.16489		Nuclear genome from Caulerpa lentillifera			Cale_scf_5	28.736	87	53	4	179	257	983094	983351	7.8
Brhy	TRINITY_DN27886_c0_g1_i1|m.60741		Nuclear genome from Caulerpa lentillifera			Cale_scf_6	57.955	176	71	2	53	226	185563	185039	7.54e-60
Brhy	TRINITY_DN27886_c0_g1_i1|m.60741		Nuclear genome from Caulerpa lentillifera			Cale_scf_6	33.929	56	33	1	1	52	185789	185622	0.28
Brhy	TRINITY_DN27886_c0_g1_i1|m.60741		Nuclear genome from Caulerpa lentillifera			Cale_scf_6	37.931	29	18	0	172	200	488517	488603	0.6
Brhy	TRINITY_DN27886_c0_g1_i1|m.60741		Nuclear genome from Caulerpa lentillifera			Cale_scf_17	42.408	191	95	5	41	216	25897	25325	1.82e-37
Brhy	TRINITY_DN27886_c0_g1_i1|m.60741		Nuclear genome from Caulerpa lentillifera			Cale_scf_21	41.361	191	97	4	41	216	36896	36324	6.16e-37
Brhy	TRINITY_DN27886_c0_g1_i1|m.60741		Nuclear genome from Caulerpa lentillifera			Cale_scf_2	37.698	252	130	8	2	226	1132409	1131654	1.35e-35
Brhy	TRINITY_DN27886_c0_g1_i1|m.60741		Nuclear genome from Caulerpa lentillifera			Cale_scf_2	34.956	226	114	7	24	219	747675	748343	1.55e-28
Brhy	TRINITY_DN27886_c0_g1_i1|m.60741		Nuclear genome from Caulerpa lentillifera			Cale_scf_5	37.302	252	129	9	2	226	188661	189410	1.22e-34
Brhy	TRINITY_DN27886_c0_g1_i1|m.60741		Nuclear genome from Caulerpa lentillifera			Cale_scf_5	34.101	217	113	4	33	219	441813	441163	1.13e-25
Brhy	TRINITY_DN27886_c0_g1_i1|m.60741		Nuclear genome from Caulerpa lentillifera			Cale_scf_15	37.815	238	113	8	24	226	510224	509511	1.98e-34
Brhy	TRINITY_DN27886_c0_g1_i1|m.60741		Nuclear genome from Caulerpa lentillifera			Cale_scf_15	45.455	22	12	0	188	209	834062	834127	2.3
Brhy	TRINITY_DN27886_c0_g1_i1|m.60741		Nuclear genome from Caulerpa lentillifera			Cale_scf_10	41.837	196	96	7	41	219	612752	613336	2.97e-34
Brhy	TRINITY_DN27886_c0_g1_i1|m.60741		Nuclear genome from Caulerpa lentillifera			Cale_scf_10	33.333	54	36	0	39	92	613097	613258	0.011
Brhy	TRINITY_DN27886_c0_g1_i1|m.60741		Nuclear genome from Caulerpa lentillifera			Cale_scf_24	40.67	209	106	7	36	226	434463	435089	9.04e-34
Brhy	TRINITY_DN27886_c0_g1_i1|m.60741		Nuclear genome from Caulerpa lentillifera			Cale_scf_19	33.208	265	108	7	3	200	25396	26184	1.09e-32
Brhy	TRINITY_DN27886_c0_g1_i1|m.60741		Nuclear genome from Caulerpa lentillifera			Cale_scf_23	36.404	228	109	8	16	225	456645	457274	4.23e-32
Brhy	TRINITY_DN27886_c0_g1_i1|m.60741		Nuclear genome from Caulerpa lentillifera			Cale_scf_13	37.917	240	107	10	18	216	523396	524112	1.5e-31
Brhy	TRINITY_DN27886_c0_g1_i1|m.60741		Nuclear genome from Caulerpa lentillifera			Cale_scf_14	35.683	227	112	7	15	225	765321	764695	2.11e-30
Brhy	TRINITY_DN27886_c0_g1_i1|m.60741		Nuclear genome from Caulerpa lentillifera			Cale_scf_3	40.123	162	58	5	102	228	874459	874932	1.11e-29
Brhy	TRINITY_DN27886_c0_g1_i1|m.60741		Nuclear genome from Caulerpa lentillifera			Cale_scf_3	30.108	93	50	2	12	90	874106	874381	1.11e-29
Brhy	TRINITY_DN27886_c0_g1_i1|m.60741		Nuclear genome from Caulerpa lentillifera			Cale_scf_3	51.562	64	28	1	159	222	372441	372259	4.26e-22
Brhy	TRINITY_DN27886_c0_g1_i1|m.60741		Nuclear genome from Caulerpa lentillifera			Cale_scf_3	29.927	137	79	4	19	143	372932	372537	4.26e-22
Brhy	TRINITY_DN27886_c0_g1_i1|m.60741		Nuclear genome from Caulerpa lentillifera			Cale_scf_3	45.714	105	52	3	120	219	963300	963614	1.51e-18
Brhy	TRINITY_DN27886_c0_g1_i1|m.60741		Nuclear genome from Caulerpa lentillifera			Cale_scf_3	40.741	54	32	0	42	95	962864	963025	5.14e-07
Brhy	TRINITY_DN27886_c0_g1_i1|m.60741		Nuclear genome from Caulerpa lentillifera			Cale_scf_3	35.135	37	24	0	56	92	963426	963536	0.19
Brhy	TRINITY_DN27886_c0_g1_i1|m.60741		Nuclear genome from Caulerpa lentillifera			Cale_scf_3	35	40	21	1	56	95	372441	372337	5.4
Brhy	TRINITY_DN27886_c0_g1_i1|m.60741		Nuclear genome from Caulerpa lentillifera			Cale_scf_3	44.186	43	20	2	67	105	874750	874878	6.6
Brhy	TRINITY_DN27886_c0_g1_i1|m.60741		Nuclear genome from Caulerpa lentillifera			Cale_scf_7	35.814	215	107	7	37	220	323840	324484	2.66e-21
Brhy	TRINITY_DN27886_c0_g1_i1|m.60741		Nuclear genome from Caulerpa lentillifera			Cale_scf_34	58.025	81	30	2	150	226	207364	207606	8.33e-21
Brhy	TRINITY_DN27886_c0_g1_i1|m.60741		Nuclear genome from Caulerpa lentillifera			Cale_scf_34	36.364	77	48	1	36	112	206877	207104	5.68e-10
Brhy	TRINITY_DN27886_c0_g1_i1|m.60741		Nuclear genome from Caulerpa lentillifera			Cale_scf_4	56.79	81	31	2	150	226	1221076	1221318	1.46e-20
Brhy	TRINITY_DN27886_c0_g1_i1|m.60741		Nuclear genome from Caulerpa lentillifera			Cale_scf_4	50.549	91	41	2	113	200	1022399	1022130	2.97e-19
Brhy	TRINITY_DN27886_c0_g1_i1|m.60741		Nuclear genome from Caulerpa lentillifera			Cale_scf_4	36.364	77	48	1	36	112	1220589	1220816	2e-10
Brhy	TRINITY_DN27886_c0_g1_i1|m.60741		Nuclear genome from Caulerpa lentillifera			Cale_scf_4	30	140	50	3	4	95	1022947	1022528	1.09e-09
Brhy	TRINITY_DN27886_c0_g1_i1|m.60741		Nuclear genome from Caulerpa lentillifera			Cale_scf_4	36.842	57	30	2	39	94	1221070	1221225	0.024
Brhy	TRINITY_DN27886_c0_g1_i1|m.60741		Nuclear genome from Caulerpa lentillifera			Cale_scf_26	43.103	116	61	3	106	216	223327	223674	2.65e-19
Brhy	TRINITY_DN27886_c0_g1_i1|m.60741		Nuclear genome from Caulerpa lentillifera			Cale_scf_26	40.741	54	32	0	42	95	222923	223084	5.63e-07
Brhy	TRINITY_DN27886_c0_g1_i1|m.60741		Nuclear genome from Caulerpa lentillifera			Cale_scf_26	35.135	37	24	0	56	92	223495	223605	0.19
Brhy	TRINITY_DN27886_c0_g1_i1|m.60741		Nuclear genome from Caulerpa lentillifera			Cale_scf_41	46.667	30	14	1	25	52	17753	17664	9.7
Brhy	TRINITY_DN27976_c0_g1_i1|m.61072		Nuclear genome from Caulerpa lentillifera			Cale_scf_1	57.255	255	104	3	6	255	458169	458933	1.53e-91
Brhy	TRINITY_DN27976_c0_g1_i1|m.61072		Nuclear genome from Caulerpa lentillifera			Cale_scf_24	51.163	86	26	1	46	115	502503	502760	1.18e-51
Brhy	TRINITY_DN27976_c0_g1_i1|m.61072		Nuclear genome from Caulerpa lentillifera			Cale_scf_24	68.519	54	17	0	202	255	503109	503270	1.18e-51
Brhy	TRINITY_DN27976_c0_g1_i1|m.61072		Nuclear genome from Caulerpa lentillifera			Cale_scf_24	51.685	89	43	0	114	202	502798	503064	1.18e-51
Brhy	TRINITY_DN27976_c0_g1_i1|m.61072		Nuclear genome from Caulerpa lentillifera			Cale_scf_12	50	30	15	0	125	154	881482	881571	0.23
Brhy	TRINITY_DN27976_c0_g1_i1|m.61072		Nuclear genome from Caulerpa lentillifera			Cale_scf_10	23.529	136	84	4	118	253	631311	631658	0.63
Brhy	TRINITY_DN29007_c0_g1_i1|m.23619		Nuclear genome from Caulerpa lentillifera			Cale_scf_4	38.938	226	118	2	115	323	814655	813987	7.69e-31
Brhy	TRINITY_DN29007_c0_g1_i1|m.23619		Nuclear genome from Caulerpa lentillifera			Cale_scf_11	57.576	66	28	0	161	226	748983	748786	2.67e-27
Brhy	TRINITY_DN29007_c0_g1_i1|m.23619		Nuclear genome from Caulerpa lentillifera			Cale_scf_11	68.421	38	12	0	124	161	749143	749030	2.67e-27
Brhy	TRINITY_DN29007_c0_g1_i1|m.23619		Nuclear genome from Caulerpa lentillifera			Cale_scf_11	57.031	128	40	1	216	328	748774	748391	4.13e-23
Brhy	TRINITY_DN29007_c0_g1_i1|m.23619		Nuclear genome from Caulerpa lentillifera			Cale_scf_18	32.323	198	106	4	127	297	454825	454235	6.27e-13
Brhy	TRINITY_DN29007_c0_g1_i1|m.23619		Nuclear genome from Caulerpa lentillifera			Cale_scf_10	54.054	37	17	0	119	155	353213	353103	0.000467
Brhy	TRINITY_DN29007_c0_g1_i1|m.23619		Nuclear genome from Caulerpa lentillifera			Cale_scf_10	32.836	67	29	1	276	326	352550	352350	0.055
Brhy	TRINITY_DN29007_c0_g1_i1|m.23619		Nuclear genome from Caulerpa lentillifera			Cale_scf_10	58.333	12	5	0	249	260	352672	352637	0.055
Brhy	TRINITY_DN29007_c0_g1_i1|m.23619		Nuclear genome from Caulerpa lentillifera			Cale_scf_44	31.731	104	54	4	117	215	15900	16175	1.6
Brhy	TRINITY_DN31290_c0_g1_i1|m.823		Nuclear genome from Caulerpa lentillifera			Cale_scf_2	62.109	256	88	4	1	249	1132409	1131648	1.61e-102
Brhy	TRINITY_DN31290_c0_g1_i1|m.823		Nuclear genome from Caulerpa lentillifera			Cale_scf_2	42.035	226	109	6	35	239	747660	748334	1.12e-47
Brhy	TRINITY_DN31290_c0_g1_i1|m.823		Nuclear genome from Caulerpa lentillifera			Cale_scf_5	62.451	253	85	5	4	249	188667	189416	8.32e-101
Brhy	TRINITY_DN31290_c0_g1_i1|m.823		Nuclear genome from Caulerpa lentillifera			Cale_scf_5	42.601	223	106	6	38	239	441837	441172	9.29e-43
Brhy	TRINITY_DN31290_c0_g1_i1|m.823		Nuclear genome from Caulerpa lentillifera			Cale_scf_15	61.789	246	82	5	11	249	510227	509505	1.47e-96
Brhy	TRINITY_DN31290_c0_g1_i1|m.823		Nuclear genome from Caulerpa lentillifera			Cale_scf_24	57.778	270	89	5	3	249	434292	435095	1.07e-95
Brhy	TRINITY_DN31290_c0_g1_i1|m.823		Nuclear genome from Caulerpa lentillifera			Cale_scf_13	57.028	249	88	6	19	249	523399	524142	1.96e-89
Brhy	TRINITY_DN31290_c0_g1_i1|m.823		Nuclear genome from Caulerpa lentillifera			Cale_scf_17	58.065	248	78	5	26	249	26026	25289	2.2e-89
Brhy	TRINITY_DN31290_c0_g1_i1|m.823		Nuclear genome from Caulerpa lentillifera			Cale_scf_10	63.111	225	72	6	36	252	612707	613372	4.12e-86
Brhy	TRINITY_DN31290_c0_g1_i1|m.823		Nuclear genome from Caulerpa lentillifera			Cale_scf_21	64.455	211	66	4	46	249	36914	36288	5.51e-86
Brhy	TRINITY_DN31290_c0_g1_i1|m.823		Nuclear genome from Caulerpa lentillifera			Cale_scf_3	58.647	133	49	2	22	151	962780	963169	1.46e-47
Brhy	TRINITY_DN31290_c0_g1_i1|m.823		Nuclear genome from Caulerpa lentillifera			Cale_scf_3	63.303	109	36	2	148	252	963324	963650	1.58e-37
Brhy	TRINITY_DN31290_c0_g1_i1|m.823		Nuclear genome from Caulerpa lentillifera			Cale_scf_3	50	60	25	1	180	239	372441	372277	2.84e-18
Brhy	TRINITY_DN31290_c0_g1_i1|m.823		Nuclear genome from Caulerpa lentillifera			Cale_scf_3	26.549	113	69	3	56	163	372848	372537	2.84e-18
Brhy	TRINITY_DN31290_c0_g1_i1|m.823		Nuclear genome from Caulerpa lentillifera			Cale_scf_3	40.157	127	44	4	145	239	874516	874896	1.73e-16
Brhy	TRINITY_DN31290_c0_g1_i1|m.823		Nuclear genome from Caulerpa lentillifera			Cale_scf_3	32.632	95	46	3	26	105	874118	874393	2.81e-09
Brhy	TRINITY_DN31290_c0_g1_i1|m.823		Nuclear genome from Caulerpa lentillifera			Cale_scf_3	29.508	61	39	2	161	220	874226	874399	0.019
Brhy	TRINITY_DN31290_c0_g1_i1|m.823		Nuclear genome from Caulerpa lentillifera			Cale_scf_3	36.364	33	21	0	180	212	372815	372717	3.9
Brhy	TRINITY_DN31290_c0_g1_i1|m.823		Nuclear genome from Caulerpa lentillifera			Cale_scf_26	58.647	133	49	2	22	151	222839	223228	2.56e-47
Brhy	TRINITY_DN31290_c0_g1_i1|m.823		Nuclear genome from Caulerpa lentillifera			Cale_scf_26	65.421	107	33	2	148	250	223393	223713	4.31e-38
Brhy	TRINITY_DN31290_c0_g1_i1|m.823		Nuclear genome from Caulerpa lentillifera			Cale_scf_6	39.773	176	95	3	64	239	185563	185069	1.58e-33
Brhy	TRINITY_DN31290_c0_g1_i1|m.823		Nuclear genome from Caulerpa lentillifera			Cale_scf_7	34.902	255	125	9	15	239	323741	324472	1.44e-26
Brhy	TRINITY_DN31290_c0_g1_i1|m.823		Nuclear genome from Caulerpa lentillifera			Cale_scf_23	34.101	217	95	8	41	239	456687	457247	1.09e-22
Brhy	TRINITY_DN31290_c0_g1_i1|m.823		Nuclear genome from Caulerpa lentillifera			Cale_scf_14	33.784	222	92	8	40	239	765288	764722	6.28e-22
Brhy	TRINITY_DN31290_c0_g1_i1|m.823		Nuclear genome from Caulerpa lentillifera			Cale_scf_19	39.355	155	79	6	79	223	25735	26184	3.92e-20
Brhy	TRINITY_DN31290_c0_g1_i1|m.823		Nuclear genome from Caulerpa lentillifera			Cale_scf_19	39.623	53	29	3	61	112	26035	26187	0.19
Brhy	TRINITY_DN31290_c0_g1_i1|m.823		Nuclear genome from Caulerpa lentillifera			Cale_scf_4	45.714	105	50	5	121	223	1022429	1022130	1.37e-18
Brhy	TRINITY_DN31290_c0_g1_i1|m.823		Nuclear genome from Caulerpa lentillifera			Cale_scf_4	44.828	29	16	0	79	107	1022611	1022525	1.37e-18
Brhy	TRINITY_DN31290_c0_g1_i1|m.823		Nuclear genome from Caulerpa lentillifera			Cale_scf_4	59.375	64	24	2	175	236	1221088	1221279	1.04e-15
Brhy	TRINITY_DN31290_c0_g1_i1|m.823		Nuclear genome from Caulerpa lentillifera			Cale_scf_4	36.735	98	57	3	37	134	1220568	1220846	1.55e-14
Brhy	TRINITY_DN31290_c0_g1_i1|m.823		Nuclear genome from Caulerpa lentillifera			Cale_scf_4	37.5	56	32	2	176	228	1220634	1220801	0.022
Brhy	TRINITY_DN31290_c0_g1_i1|m.823		Nuclear genome from Caulerpa lentillifera			Cale_scf_4	28.704	108	61	5	19	112	1022444	1022127	0.12
Brhy	TRINITY_DN31290_c0_g1_i1|m.823		Nuclear genome from Caulerpa lentillifera			Cale_scf_34	59.375	64	24	2	175	236	207376	207567	1.65e-15
Brhy	TRINITY_DN31290_c0_g1_i1|m.823		Nuclear genome from Caulerpa lentillifera			Cale_scf_34	33.962	106	65	3	29	134	206832	207134	1.52e-14
Brhy	TRINITY_DN31290_c0_g1_i1|m.823		Nuclear genome from Caulerpa lentillifera			Cale_scf_34	37.5	56	32	2	176	228	206922	207089	0.022
Brhy	TRINITY_DN31290_c0_g1_i1|m.823		Nuclear genome from Caulerpa lentillifera			Cale_scf_34	38.462	26	16	0	90	115	172563	172640	2
Brhy	TRINITY_DN31298_c0_g1_i1|m.789		Nuclear genome from Caulerpa lentillifera			Cale_scf_14	67.647	34	11	0	111	144	764148	764249	1.05e-09
Brhy	TRINITY_DN31298_c0_g1_i1|m.789		Nuclear genome from Caulerpa lentillifera			Cale_scf_8	46.154	26	14	0	83	108	910924	911001	5.5
Brhy	TRINITY_DN31298_c0_g1_i1|m.789		Nuclear genome from Caulerpa lentillifera			Cale_scf_6	37.5	40	25	0	100	139	1041286	1041167	5.7
Brhy	TRINITY_DN31326_c0_g1_i1|m.12617		Nuclear genome from Caulerpa lentillifera			Cale_scf_3	74.766	107	26	1	205	310	372465	372145	2.22e-77
Brhy	TRINITY_DN31326_c0_g1_i1|m.12617		Nuclear genome from Caulerpa lentillifera			Cale_scf_3	50.427	117	41	1	109	208	372848	372498	2.22e-77
Brhy	TRINITY_DN31326_c0_g1_i1|m.12617		Nuclear genome from Caulerpa lentillifera			Cale_scf_3	48.78	41	20	1	75	114	373000	372878	2.22e-77
Brhy	TRINITY_DN31326_c0_g1_i1|m.12617		Nuclear genome from Caulerpa lentillifera			Cale_scf_3	36.478	159	57	6	156	273	874447	874914	1.43e-29
Brhy	TRINITY_DN31326_c0_g1_i1|m.12617		Nuclear genome from Caulerpa lentillifera			Cale_scf_3	36.275	102	49	2	76	163	874109	874408	1.43e-29
Brhy	TRINITY_DN31326_c0_g1_i1|m.12617		Nuclear genome from Caulerpa lentillifera			Cale_scf_3	51.562	64	26	1	213	271	963426	963617	1.64e-11
Brhy	TRINITY_DN31326_c0_g1_i1|m.12617		Nuclear genome from Caulerpa lentillifera			Cale_scf_3	33	100	51	3	88	171	962786	963085	1.04e-07
Brhy	TRINITY_DN31326_c0_g1_i1|m.12617		Nuclear genome from Caulerpa lentillifera			Cale_scf_3	42.424	33	19	0	120	152	963426	963524	0.28
Brhy	TRINITY_DN31326_c0_g1_i1|m.12617		Nuclear genome from Caulerpa lentillifera			Cale_scf_14	45.146	206	94	3	84	271	765324	764710	1.42e-48
Brhy	TRINITY_DN31326_c0_g1_i1|m.12617		Nuclear genome from Caulerpa lentillifera			Cale_scf_23	43.049	223	99	5	66	271	456624	457259	7.73e-47
Brhy	TRINITY_DN31326_c0_g1_i1|m.12617		Nuclear genome from Caulerpa lentillifera			Cale_scf_2	31.864	295	160	9	16	271	1132550	1131672	2.04e-28
Brhy	TRINITY_DN31326_c0_g1_i1|m.12617		Nuclear genome from Caulerpa lentillifera			Cale_scf_2	32.558	215	101	6	108	279	747726	748367	4.78e-21
Brhy	TRINITY_DN31326_c0_g1_i1|m.12617		Nuclear genome from Caulerpa lentillifera			Cale_scf_6	43.103	174	79	5	117	273	185563	185051	9.19e-28
Brhy	TRINITY_DN31326_c0_g1_i1|m.12617		Nuclear genome from Caulerpa lentillifera			Cale_scf_5	34.728	239	116	8	71	271	188682	189392	2.07e-27
Brhy	TRINITY_DN31326_c0_g1_i1|m.12617		Nuclear genome from Caulerpa lentillifera			Cale_scf_5	31.336	217	105	6	97	270	441810	441163	3.69e-18
Brhy	TRINITY_DN31326_c0_g1_i1|m.12617		Nuclear genome from Caulerpa lentillifera			Cale_scf_15	34.667	225	107	8	85	271	510197	509529	1.5e-25
Brhy	TRINITY_DN31326_c0_g1_i1|m.12617		Nuclear genome from Caulerpa lentillifera			Cale_scf_24	34.375	224	107	8	86	271	434406	435071	4.77e-25
Brhy	TRINITY_DN31326_c0_g1_i1|m.12617		Nuclear genome from Caulerpa lentillifera			Cale_scf_7	33.778	225	89	8	99	271	323834	324484	1.11e-23
Brhy	TRINITY_DN31326_c0_g1_i1|m.12617		Nuclear genome from Caulerpa lentillifera			Cale_scf_10	34.184	196	96	5	107	271	612758	613339	1.05e-22
Brhy	TRINITY_DN31326_c0_g1_i1|m.12617		Nuclear genome from Caulerpa lentillifera			Cale_scf_10	30.159	126	77	5	71	189	612995	613360	0.007
Brhy	TRINITY_DN31326_c0_g1_i1|m.12617		Nuclear genome from Caulerpa lentillifera			Cale_scf_10	46.667	30	13	1	253	279	357920	358009	7.8
Brhy	TRINITY_DN31326_c0_g1_i1|m.12617		Nuclear genome from Caulerpa lentillifera			Cale_scf_17	32.5	240	109	8	85	271	26032	25313	9.67e-22
Brhy	TRINITY_DN31326_c0_g1_i1|m.12617		Nuclear genome from Caulerpa lentillifera			Cale_scf_17	35.135	74	41	3	120	189	25504	25292	0.043
Brhy	TRINITY_DN31326_c0_g1_i1|m.12617		Nuclear genome from Caulerpa lentillifera			Cale_scf_21	35.751	193	96	6	107	271	36890	36312	2.51e-21
Brhy	TRINITY_DN31326_c0_g1_i1|m.12617		Nuclear genome from Caulerpa lentillifera			Cale_scf_21	27.869	183	104	8	29	189	36821	36291	0.045
Brhy	TRINITY_DN31326_c0_g1_i1|m.12617		Nuclear genome from Caulerpa lentillifera			Cale_scf_13	31.197	234	108	7	87	267	523411	524112	9.83e-20
Brhy	TRINITY_DN31326_c0_g1_i1|m.12617		Nuclear genome from Caulerpa lentillifera			Cale_scf_34	48.276	87	39	2	88	168	206841	207101	5.1e-18
Brhy	TRINITY_DN31326_c0_g1_i1|m.12617		Nuclear genome from Caulerpa lentillifera			Cale_scf_34	49.383	81	34	2	198	273	207358	207594	1.28e-14
Brhy	TRINITY_DN31326_c0_g1_i1|m.12617		Nuclear genome from Caulerpa lentillifera			Cale_scf_4	50.617	81	34	2	94	168	1220571	1220813	6.33e-18
Brhy	TRINITY_DN31326_c0_g1_i1|m.12617		Nuclear genome from Caulerpa lentillifera			Cale_scf_4	48.148	81	35	2	198	273	1221070	1221306	2.14e-14
Brhy	TRINITY_DN31326_c0_g1_i1|m.12617		Nuclear genome from Caulerpa lentillifera			Cale_scf_4	34.409	93	53	2	171	257	1022384	1022112	0.000178
Brhy	TRINITY_DN31326_c0_g1_i1|m.12617		Nuclear genome from Caulerpa lentillifera			Cale_scf_4	27.835	97	26	2	100	152	1022839	1022549	0.12
Brhy	TRINITY_DN31326_c0_g1_i1|m.12617		Nuclear genome from Caulerpa lentillifera			Cale_scf_4	38.235	34	20	1	120	152	1022264	1022163	1.5
Brhy	TRINITY_DN31326_c0_g1_i1|m.12617		Nuclear genome from Caulerpa lentillifera			Cale_scf_26	51.562	64	26	1	213	271	223495	223686	1.64e-11
Brhy	TRINITY_DN31326_c0_g1_i1|m.12617		Nuclear genome from Caulerpa lentillifera			Cale_scf_26	33	100	51	3	88	171	222845	223144	2.06e-07
Brhy	TRINITY_DN31326_c0_g1_i1|m.12617		Nuclear genome from Caulerpa lentillifera			Cale_scf_26	42.424	33	19	0	120	152	223495	223593	0.28
Brhy	TRINITY_DN31326_c0_g1_i1|m.12617		Nuclear genome from Caulerpa lentillifera			Cale_scf_19	27.66	235	90	8	100	257	25507	26202	2.57e-10
Brhy	TRINITY_DN31326_c0_g1_i1|m.12617		Nuclear genome from Caulerpa lentillifera			Cale_scf_18	34.375	64	38	2	7	67	329215	329027	10
Brhy	TRINITY_DN31408_c0_g1_i1|m.38740		Nuclear genome from Caulerpa lentillifera			Cale_scf_16	65.942	138	16	2	83	189	451610	452023	1.25e-56
Brhy	TRINITY_DN31408_c0_g1_i1|m.38740		Nuclear genome from Caulerpa lentillifera			Cale_scf_16	66.667	51	17	0	35	85	451417	451569	1.25e-56
Brhy	TRINITY_DN31408_c0_g1_i1|m.38740		Nuclear genome from Caulerpa lentillifera			Cale_scf_16	76.923	13	3	0	187	199	452065	452103	1.25e-56
Brhy	TRINITY_DN31408_c0_g1_i1|m.38740		Nuclear genome from Caulerpa lentillifera			Cale_scf_20	52.98	151	38	2	56	173	424221	423769	5.77e-40
Brhy	TRINITY_DN31408_c0_g1_i1|m.38740		Nuclear genome from Caulerpa lentillifera			Cale_scf_20	45.455	55	11	1	164	199	423748	423584	0.000444
Brhy	TRINITY_DN31408_c0_g1_i1|m.38740		Nuclear genome from Caulerpa lentillifera			Cale_scf_8	31.579	57	38	1	101	157	989344	989177	0.55
Brhy	TRINITY_DN31408_c0_g1_i1|m.38740		Nuclear genome from Caulerpa lentillifera			Cale_scf_19	40.741	27	16	0	12	38	582788	582868	3.7
Brhy	TRINITY_DN31415_c0_g1_i1|m.38867		Nuclear genome from Caulerpa lentillifera			Cale_scf_8	70.526	95	28	0	77	171	150939	151223	8.19e-40
Brhy	TRINITY_DN31415_c0_g1_i1|m.38867		Nuclear genome from Caulerpa lentillifera			Cale_scf_8	34.375	32	21	0	120	151	947335	947430	1.7
Brhy	TRINITY_DN31415_c0_g1_i1|m.38867		Nuclear genome from Caulerpa lentillifera			Cale_scf_14	38.095	42	22	1	90	127	750776	750901	9.4
Brhy	TRINITY_DN31766_c0_g1_i1|m.38192		Nuclear genome from Caulerpa lentillifera			Cale_scf_4	42.215	289	145	6	52	331	794993	795820	3.72e-63
Brhy	TRINITY_DN31766_c0_g1_i1|m.38192		Nuclear genome from Caulerpa lentillifera			Cale_scf_18	23.239	142	79	4	170	292	203536	203144	1.1
Brhy	TRINITY_DN31766_c0_g1_i1|m.38192		Nuclear genome from Caulerpa lentillifera			Cale_scf_18	34.375	32	21	0	193	224	573839	573744	9.1
Brhy	TRINITY_DN31766_c0_g1_i1|m.38192		Nuclear genome from Caulerpa lentillifera			Cale_scf_18	44.444	27	15	0	226	252	573766	573686	9.1
Brhy	TRINITY_DN31766_c0_g1_i1|m.38192		Nuclear genome from Caulerpa lentillifera			Cale_scf_25	31.579	76	44	2	40	107	193080	192853	2.1
Brhy	TRINITY_DN31766_c0_g1_i1|m.38192		Nuclear genome from Caulerpa lentillifera			Cale_scf_25	31.915	47	26	2	89	129	87777	87637	5.8
Brhy	TRINITY_DN32025_c0_g1_i1|m.57757		Nuclear genome from Caulerpa lentillifera			Cale_scf_3	75	68	17	0	79	146	698060	698263	1.74e-28
Brhy	TRINITY_DN32025_c0_g1_i1|m.57757		Nuclear genome from Caulerpa lentillifera			Cale_scf_3	57.812	64	25	2	16	78	697830	698018	1.74e-28
Brhy	TRINITY_DN32025_c0_g1_i1|m.57757		Nuclear genome from Caulerpa lentillifera			Cale_scf_6	46.429	28	15	0	4	31	962423	962340	0.15
Brhy	TRINITY_DN32025_c0_g1_i1|m.57757		Nuclear genome from Caulerpa lentillifera			Cale_scf_6	42.857	21	12	0	12	32	11190	11252	4
Brhy	TRINITY_DN35033_c0_g1_i1|m.48831		Nuclear genome from Caulerpa lentillifera			Cale_scf_5	81.887	265	48	0	224	488	547943	548737	5.46e-141
Brhy	TRINITY_DN35033_c0_g1_i1|m.48831		Nuclear genome from Caulerpa lentillifera			Cale_scf_5	45.405	185	43	4	85	224	547390	547905	5.46e-141
Brhy	TRINITY_DN35033_c0_g1_i1|m.48831		Nuclear genome from Caulerpa lentillifera			Cale_scf_22	31.25	48	30	1	280	324	335373	335230	6.3
Brhy	TRINITY_DN35043_c0_g1_i1|m.48937		Nuclear genome from Caulerpa lentillifera			Cale_scf_20	72.414	58	16	0	145	202	61294	61467	3.66e-36
Brhy	TRINITY_DN35043_c0_g1_i1|m.48937		Nuclear genome from Caulerpa lentillifera			Cale_scf_20	51.316	76	33	1	72	143	61023	61250	3.66e-36
Brhy	TRINITY_DN35043_c0_g1_i1|m.48937		Nuclear genome from Caulerpa lentillifera			Cale_scf_16	65.079	63	22	0	142	204	833027	832839	3.02e-34
Brhy	TRINITY_DN35043_c0_g1_i1|m.48937		Nuclear genome from Caulerpa lentillifera			Cale_scf_16	60	55	22	0	89	143	833233	833069	3.02e-34
Brhy	TRINITY_DN35043_c0_g1_i1|m.48937		Nuclear genome from Caulerpa lentillifera			Cale_scf_16	33.333	24	16	0	119	142	723324	723253	4.4
Brhy	TRINITY_DN35043_c0_g1_i1|m.48937		Nuclear genome from Caulerpa lentillifera			Cale_scf_14	28.421	95	55	3	4	98	680263	680018	1.4
Brhy	TRINITY_DN35043_c0_g1_i1|m.48937		Nuclear genome from Caulerpa lentillifera			Cale_scf_159	43.59	39	20	1	21	57	45	161	2.4
Brhy	TRINITY_DN35043_c0_g1_i1|m.48937		Nuclear genome from Caulerpa lentillifera			Cale_scf_35	43.59	39	20	1	21	57	38598	38482	3.3
Brhy	TRINITY_DN35043_c0_g1_i1|m.48937		Nuclear genome from Caulerpa lentillifera			Cale_scf_29	32.432	37	25	0	5	41	180275	180385	5.4
Brhy	TRINITY_DN35043_c0_g1_i1|m.48937		Nuclear genome from Caulerpa lentillifera			Cale_scf_13	42.308	26	15	0	18	43	147155	147232	5.4
Brhy	TRINITY_DN35043_c0_g1_i1|m.48937		Nuclear genome from Caulerpa lentillifera			Cale_scf_17	35.185	54	32	2	11	63	614192	614347	8.7
Brhy	TRINITY_DN35053_c0_g1_i1|m.48782		Nuclear genome from Caulerpa lentillifera			Cale_scf_16	71.285	498	120	3	71	547	144212	142725	0
Brhy	TRINITY_DN35053_c0_g1_i1|m.48782		Nuclear genome from Caulerpa lentillifera			Cale_scf_6	68.182	22	7	0	279	300	275591	275526	0.52
Brhy	TRINITY_DN35053_c0_g1_i1|m.48782		Nuclear genome from Caulerpa lentillifera			Cale_scf_11	30.909	55	31	1	284	338	217774	217917	0.85
Brhy	TRINITY_DN35053_c0_g1_i1|m.48782		Nuclear genome from Caulerpa lentillifera			Cale_scf_11	28.302	53	31	1	284	336	278750	278613	0.95
Brhy	TRINITY_DN35053_c0_g1_i1|m.48782		Nuclear genome from Caulerpa lentillifera			Cale_scf_11	31.25	64	32	3	284	347	286463	286308	1.5
Brhy	TRINITY_DN35053_c0_g1_i1|m.48782		Nuclear genome from Caulerpa lentillifera			Cale_scf_11	60	20	8	0	281	300	274331	274272	1.8
Brhy	TRINITY_DN35053_c0_g1_i1|m.48782		Nuclear genome from Caulerpa lentillifera			Cale_scf_11	29.032	62	37	2	284	345	267692	267528	3.7
Brhy	TRINITY_DN35053_c0_g1_i1|m.48782		Nuclear genome from Caulerpa lentillifera			Cale_scf_11	30.909	55	31	1	284	338	215222	215365	4.8
Brhy	TRINITY_DN35053_c0_g1_i1|m.48782		Nuclear genome from Caulerpa lentillifera			Cale_scf_7	36.842	38	24	0	408	445	963074	962961	1.1
Brhy	TRINITY_DN35053_c0_g1_i1|m.48782		Nuclear genome from Caulerpa lentillifera			Cale_scf_14	38.298	47	29	0	408	454	656627	656487	1.1
Brhy	TRINITY_DN35055_c0_g1_i1|m.48902		Nuclear genome from Caulerpa lentillifera			Cale_scf_3	75	68	17	0	121	188	698060	698263	2.36e-29
Brhy	TRINITY_DN35055_c0_g1_i1|m.48902		Nuclear genome from Caulerpa lentillifera			Cale_scf_3	59.322	59	23	1	62	120	697845	698018	2.36e-29
Brhy	TRINITY_DN35055_c0_g1_i1|m.48902		Nuclear genome from Caulerpa lentillifera			Cale_scf_6	30.159	63	32	2	22	74	11070	11252	1.1
Brhy	TRINITY_DN35055_c0_g1_i1|m.48902		Nuclear genome from Caulerpa lentillifera			Cale_scf_19	22.936	109	78	2	15	122	239884	239573	2.1
Brhy	TRINITY_DN35055_c0_g1_i1|m.48902		Nuclear genome from Caulerpa lentillifera			Cale_scf_14	41.667	24	14	0	3	26	300740	300811	5.1
Brhy	TRINITY_DN35100_c0_g1_i1|m.17347		Nuclear genome from Caulerpa lentillifera			Cale_scf_7	75.155	161	33	4	19	175	668210	668683	5.11e-73
Brhy	TRINITY_DN35100_c0_g1_i1|m.17347		Nuclear genome from Caulerpa lentillifera			Cale_scf_7	80.645	31	6	0	176	206	668805	668897	5.11e-73
Brhy	TRINITY_DN35100_c0_g1_i1|m.17347		Nuclear genome from Caulerpa lentillifera			Cale_scf_1	47.826	23	12	0	106	128	530238	530170	5.5
Brhy	TRINITY_DN35106_c0_g1_i1|m.17297		Nuclear genome from Caulerpa lentillifera			Cale_scf_5	39.252	107	61	2	94	196	912794	913114	3.4e-11
Brhy	TRINITY_DN35106_c0_g1_i1|m.17297		Nuclear genome from Caulerpa lentillifera			Cale_scf_2	33.099	142	90	3	60	196	189959	189534	2.1e-08
Brhy	TRINITY_DN35130_c1_g1_i1|m.17373		Nuclear genome from Caulerpa lentillifera			Cale_scf_16	72.653	245	61	2	112	352	383754	383026	6.56e-111
Brhy	TRINITY_DN35130_c1_g1_i1|m.17373		Nuclear genome from Caulerpa lentillifera			Cale_scf_16	35.443	79	31	3	36	95	384086	383853	0.36
Brhy	TRINITY_DN35130_c1_g1_i1|m.17373		Nuclear genome from Caulerpa lentillifera			Cale_scf_26	34.524	84	30	5	5	64	84546	84794	1.4
Brhy	TRINITY_DN35130_c1_g1_i1|m.17373		Nuclear genome from Caulerpa lentillifera			Cale_scf_2	25.581	129	73	6	155	278	329036	329368	6.2
Brhy	TRINITY_DN35373_c0_g1_i1|m.36129		Nuclear genome from Caulerpa lentillifera			Cale_scf_38	31.285	179	120	1	102	280	73900	73373	3.59e-20
Brhy	TRINITY_DN35653_c0_g1_i1|m.44671		Nuclear genome from Caulerpa lentillifera			Cale_scf_18	50	30	15	0	130	159	751321	751410	1.57e-05
Brhy	TRINITY_DN35653_c0_g1_i1|m.44671		Nuclear genome from Caulerpa lentillifera			Cale_scf_18	33.333	36	24	0	97	132	751175	751282	1.57e-05
Brhy	TRINITY_DN35653_c0_g1_i1|m.44671		Nuclear genome from Caulerpa lentillifera			Cale_scf_21	40	30	18	0	104	133	136449	136360	0.4
Brhy	TRINITY_DN35653_c0_g1_i1|m.44671		Nuclear genome from Caulerpa lentillifera			Cale_scf_25	29.508	61	43	0	61	121	13341	13159	1.8
Brhy	TRINITY_DN35653_c0_g1_i1|m.44671		Nuclear genome from Caulerpa lentillifera			Cale_scf_11	30.435	46	32	0	74	119	406168	406305	2.6
Brhy	TRINITY_DN35653_c0_g1_i1|m.44671		Nuclear genome from Caulerpa lentillifera			Cale_scf_29	28.788	66	41	1	35	94	178871	179068	4.5
Brhy	TRINITY_DN35653_c0_g1_i1|m.44671		Nuclear genome from Caulerpa lentillifera			Cale_scf_1	33.333	57	37	1	75	131	494929	494762	8.8
Brhy	TRINITY_DN35653_c0_g1_i1|m.44671		Nuclear genome from Caulerpa lentillifera			Cale_scf_24	36	25	16	0	97	121	73534	73460	9.9
Brhy	TRINITY_DN35653_c0_g1_i1|m.44671		Nuclear genome from Caulerpa lentillifera			Cale_scf_17	29.787	47	32	1	37	83	347035	347172	9.9
Brhy	TRINITY_DN35724_c0_g1_i1|m.33570		Nuclear genome from Caulerpa lentillifera			Cale_scf_15	47.778	90	44	2	12	98	218286	218555	6.44e-21
Brhy	TRINITY_DN35724_c0_g1_i1|m.33570		Nuclear genome from Caulerpa lentillifera			Cale_scf_2	31.667	60	35	1	24	83	213639	213478	0.35
Brhy	TRINITY_DN35724_c0_g1_i1|m.33570		Nuclear genome from Caulerpa lentillifera			Cale_scf_1	40	30	18	0	29	58	1051838	1051927	0.56
Brhy	TRINITY_DN35724_c0_g1_i1|m.33570		Nuclear genome from Caulerpa lentillifera			Cale_scf_28	27.66	47	34	0	60	106	99492	99632	3.6
Brhy	TRINITY_DN35724_c0_g1_i1|m.33570		Nuclear genome from Caulerpa lentillifera			Cale_scf_24	36.364	22	14	0	61	82	207299	207234	7.9
Brhy	TRINITY_DN35724_c0_g1_i1|m.33570		Nuclear genome from Caulerpa lentillifera			Cale_scf_17	29.73	37	26	0	45	81	250988	250878	8.5
Brhy	TRINITY_DN407_c0_g2_i1|m.38613		Nuclear genome from Caulerpa lentillifera			Cale_scf_2	73.364	214	54	1	1	211	1132409	1131768	2.73e-105
Brhy	TRINITY_DN407_c0_g2_i1|m.38613		Nuclear genome from Caulerpa lentillifera			Cale_scf_2	45.96	198	88	5	32	211	747660	748250	1.14e-43
Brhy	TRINITY_DN407_c0_g2_i1|m.38613		Nuclear genome from Caulerpa lentillifera			Cale_scf_2	40.625	32	19	0	65	96	748158	748253	2.4
Brhy	TRINITY_DN407_c0_g2_i1|m.38613		Nuclear genome from Caulerpa lentillifera			Cale_scf_5	73.709	213	53	2	1	211	188661	189296	7.34e-104
Brhy	TRINITY_DN407_c0_g2_i1|m.38613		Nuclear genome from Caulerpa lentillifera			Cale_scf_5	43.59	195	91	5	35	211	441837	441256	1.23e-35
Brhy	TRINITY_DN407_c0_g2_i1|m.38613		Nuclear genome from Caulerpa lentillifera			Cale_scf_5	40.625	32	19	0	65	96	441348	441253	2.6
Brhy	TRINITY_DN407_c0_g2_i1|m.38613		Nuclear genome from Caulerpa lentillifera			Cale_scf_15	78.534	191	41	0	21	211	510197	509625	5.43e-102
Brhy	TRINITY_DN407_c0_g2_i1|m.38613		Nuclear genome from Caulerpa lentillifera			Cale_scf_24	78.307	189	41	0	23	211	434409	434975	7.26e-101
Brhy	TRINITY_DN407_c0_g2_i1|m.38613		Nuclear genome from Caulerpa lentillifera			Cale_scf_17	66.079	227	57	2	5	211	26089	25409	3.79e-95
Brhy	TRINITY_DN407_c0_g2_i1|m.38613		Nuclear genome from Caulerpa lentillifera			Cale_scf_13	68.72	211	48	4	18	211	523399	524028	4.01e-89
Brhy	TRINITY_DN407_c0_g2_i1|m.38613		Nuclear genome from Caulerpa lentillifera			Cale_scf_13	31.579	57	34	1	43	99	523885	524040	0.3
Brhy	TRINITY_DN407_c0_g2_i1|m.38613		Nuclear genome from Caulerpa lentillifera			Cale_scf_13	45.833	24	13	0	69	92	193016	192945	2.3
Brhy	TRINITY_DN407_c0_g2_i1|m.38613		Nuclear genome from Caulerpa lentillifera			Cale_scf_21	78.698	169	36	0	43	211	36914	36408	1.4e-88
Brhy	TRINITY_DN407_c0_g2_i1|m.38613		Nuclear genome from Caulerpa lentillifera			Cale_scf_21	60	25	10	0	19	43	37039	36965	0.021
Brhy	TRINITY_DN407_c0_g2_i1|m.38613		Nuclear genome from Caulerpa lentillifera			Cale_scf_10	76.111	180	41	2	33	211	612707	613243	1.22e-87
Brhy	TRINITY_DN407_c0_g2_i1|m.38613		Nuclear genome from Caulerpa lentillifera			Cale_scf_10	32.558	43	29	0	54	96	613118	613246	4.7
Brhy	TRINITY_DN407_c0_g2_i1|m.38613		Nuclear genome from Caulerpa lentillifera			Cale_scf_26	78.462	130	28	0	22	151	222839	223228	9.13e-67
Brhy	TRINITY_DN407_c0_g2_i1|m.38613		Nuclear genome from Caulerpa lentillifera			Cale_scf_26	86.885	61	8	0	151	211	223408	223590	9.1e-29
Brhy	TRINITY_DN407_c0_g2_i1|m.38613		Nuclear genome from Caulerpa lentillifera			Cale_scf_3	77.692	130	29	0	22	151	962780	963169	1.68e-66
Brhy	TRINITY_DN407_c0_g2_i1|m.38613		Nuclear genome from Caulerpa lentillifera			Cale_scf_3	86.885	61	8	0	151	211	963339	963521	9.1e-29
Brhy	TRINITY_DN407_c0_g2_i1|m.38613		Nuclear genome from Caulerpa lentillifera			Cale_scf_3	48.276	58	30	0	54	111	874247	874420	8.64e-15
Brhy	TRINITY_DN407_c0_g2_i1|m.38613		Nuclear genome from Caulerpa lentillifera			Cale_scf_3	32.99	97	35	4	145	211	874522	874812	8.64e-15
Brhy	TRINITY_DN407_c0_g2_i1|m.38613		Nuclear genome from Caulerpa lentillifera			Cale_scf_3	39.437	71	35	1	53	123	372848	372660	4.58e-06
Brhy	TRINITY_DN407_c0_g2_i1|m.38613		Nuclear genome from Caulerpa lentillifera			Cale_scf_3	44.444	45	24	1	167	210	874235	874369	0.001
Brhy	TRINITY_DN407_c0_g2_i1|m.38613		Nuclear genome from Caulerpa lentillifera			Cale_scf_3	56.667	30	8	1	180	209	372441	372367	0.011
Brhy	TRINITY_DN407_c0_g2_i1|m.38613		Nuclear genome from Caulerpa lentillifera			Cale_scf_6	40.268	149	75	4	61	209	185563	185159	1.58e-24
Brhy	TRINITY_DN407_c0_g2_i1|m.38613		Nuclear genome from Caulerpa lentillifera			Cale_scf_6	38.889	36	22	0	175	210	185569	185462	0.6
Brhy	TRINITY_DN407_c0_g2_i1|m.38613		Nuclear genome from Caulerpa lentillifera			Cale_scf_19	32.719	217	80	7	51	211	25528	26148	1.15e-17
Brhy	TRINITY_DN407_c0_g2_i1|m.38613		Nuclear genome from Caulerpa lentillifera			Cale_scf_19	38.462	39	24	0	58	96	26035	26151	1.2
Brhy	TRINITY_DN407_c0_g2_i1|m.38613		Nuclear genome from Caulerpa lentillifera			Cale_scf_7	36.508	189	78	10	52	211	323861	324388	6.46e-17
Brhy	TRINITY_DN407_c0_g2_i1|m.38613		Nuclear genome from Caulerpa lentillifera			Cale_scf_23	29.646	226	100	8	4	211	456609	457163	2.57e-16
Brhy	TRINITY_DN407_c0_g2_i1|m.38613		Nuclear genome from Caulerpa lentillifera			Cale_scf_4	42.857	98	42	5	118	211	1022429	1022166	2.65e-15
Brhy	TRINITY_DN407_c0_g2_i1|m.38613		Nuclear genome from Caulerpa lentillifera			Cale_scf_4	28.866	97	25	1	51	103	1022818	1022528	2.65e-15
Brhy	TRINITY_DN407_c0_g2_i1|m.38613		Nuclear genome from Caulerpa lentillifera			Cale_scf_4	32.787	122	76	3	26	147	1220544	1220891	3.83e-13
Brhy	TRINITY_DN407_c0_g2_i1|m.38613		Nuclear genome from Caulerpa lentillifera			Cale_scf_4	60.526	38	13	2	175	210	1221088	1221201	1.02e-05
Brhy	TRINITY_DN407_c0_g2_i1|m.38613		Nuclear genome from Caulerpa lentillifera			Cale_scf_4	47.5	40	20	1	171	209	1220619	1220738	0.025
Brhy	TRINITY_DN407_c0_g2_i1|m.38613		Nuclear genome from Caulerpa lentillifera			Cale_scf_4	35.897	39	25	0	58	96	1022279	1022163	2.8
Brhy	TRINITY_DN407_c0_g2_i1|m.38613		Nuclear genome from Caulerpa lentillifera			Cale_scf_14	30.052	193	83	6	38	211	765285	764806	1.24e-13
Brhy	TRINITY_DN407_c0_g2_i1|m.38613		Nuclear genome from Caulerpa lentillifera			Cale_scf_34	32.787	122	76	3	26	147	206832	207179	1.25e-13
Brhy	TRINITY_DN407_c0_g2_i1|m.38613		Nuclear genome from Caulerpa lentillifera			Cale_scf_34	63.158	38	12	2	175	210	207376	207489	5.35e-06
Brhy	TRINITY_DN407_c0_g2_i1|m.38613		Nuclear genome from Caulerpa lentillifera			Cale_scf_34	47.5	40	20	1	171	209	206907	207026	0.025
Brhy	TRINITY_DN407_c0_g2_i1|m.38613		Nuclear genome from Caulerpa lentillifera			Cale_scf_34	40	40	23	1	58	96	207376	207495	1.1
Brhy	TRINITY_DN407_c0_g2_i1|m.38613		Nuclear genome from Caulerpa lentillifera			Cale_scf_35	29.787	47	33	0	142	188	112970	112830	0.17
Brhy	TRINITY_DN4257_c0_g1_i1|m.50760		Nuclear genome from Caulerpa lentillifera			Cale_scf_5	85.443	158	23	0	1	158	188814	189287	2.13e-87
Brhy	TRINITY_DN4257_c0_g1_i1|m.50760		Nuclear genome from Caulerpa lentillifera			Cale_scf_5	43.605	172	80	4	3	158	441777	441265	3.66e-31
Brhy	TRINITY_DN4257_c0_g1_i1|m.50760		Nuclear genome from Caulerpa lentillifera			Cale_scf_5	33.962	53	34	1	8	60	189186	189341	0.071
Brhy	TRINITY_DN4257_c0_g1_i1|m.50760		Nuclear genome from Caulerpa lentillifera			Cale_scf_15	85.443	158	23	0	1	158	510107	509634	3.13e-87
Brhy	TRINITY_DN4257_c0_g1_i1|m.50760		Nuclear genome from Caulerpa lentillifera			Cale_scf_15	33.962	53	34	1	8	60	509735	509580	0.083
Brhy	TRINITY_DN4257_c0_g1_i1|m.50760		Nuclear genome from Caulerpa lentillifera			Cale_scf_2	85.443	158	23	0	1	158	1132250	1131777	3.87e-87
Brhy	TRINITY_DN4257_c0_g1_i1|m.50760		Nuclear genome from Caulerpa lentillifera			Cale_scf_2	45.349	172	77	4	2	157	747726	748238	1.44e-35
Brhy	TRINITY_DN4257_c0_g1_i1|m.50760		Nuclear genome from Caulerpa lentillifera			Cale_scf_2	33.962	53	34	1	8	60	1131878	1131723	0.087
Brhy	TRINITY_DN4257_c0_g1_i1|m.50760		Nuclear genome from Caulerpa lentillifera			Cale_scf_24	85.443	158	23	0	1	158	434493	434966	7.06e-87
Brhy	TRINITY_DN4257_c0_g1_i1|m.50760		Nuclear genome from Caulerpa lentillifera			Cale_scf_24	33.962	53	34	1	8	60	434865	435020	0.078
Brhy	TRINITY_DN4257_c0_g1_i1|m.50760		Nuclear genome from Caulerpa lentillifera			Cale_scf_21	84.177	158	25	0	1	158	36890	36417	3.7e-86
Brhy	TRINITY_DN4257_c0_g1_i1|m.50760		Nuclear genome from Caulerpa lentillifera			Cale_scf_21	33.962	53	34	1	8	60	36518	36363	0.078
Brhy	TRINITY_DN4257_c0_g1_i1|m.50760		Nuclear genome from Caulerpa lentillifera			Cale_scf_17	83.544	158	26	0	1	158	25891	25418	4.15e-86
Brhy	TRINITY_DN4257_c0_g1_i1|m.50760		Nuclear genome from Caulerpa lentillifera			Cale_scf_17	33.333	57	37	1	4	60	25531	25364	0.066
Brhy	TRINITY_DN4257_c0_g1_i1|m.50760		Nuclear genome from Caulerpa lentillifera			Cale_scf_10	76.101	159	37	1	1	158	612758	613234	8.2e-75
Brhy	TRINITY_DN4257_c0_g1_i1|m.50760		Nuclear genome from Caulerpa lentillifera			Cale_scf_10	33.333	57	38	0	4	60	613118	613288	0.047
Brhy	TRINITY_DN4257_c0_g1_i1|m.50760		Nuclear genome from Caulerpa lentillifera			Cale_scf_13	69.942	173	37	2	1	158	523501	524019	6.85e-73
Brhy	TRINITY_DN4257_c0_g1_i1|m.50760		Nuclear genome from Caulerpa lentillifera			Cale_scf_13	33.333	57	38	0	4	60	523903	524073	0.022
Brhy	TRINITY_DN4257_c0_g1_i1|m.50760		Nuclear genome from Caulerpa lentillifera			Cale_scf_3	75.248	101	25	0	1	101	962867	963169	2.47e-47
Brhy	TRINITY_DN4257_c0_g1_i1|m.50760		Nuclear genome from Caulerpa lentillifera			Cale_scf_3	77.586	58	13	0	101	158	963339	963512	3.68e-23
Brhy	TRINITY_DN4257_c0_g1_i1|m.50760		Nuclear genome from Caulerpa lentillifera			Cale_scf_3	48.077	52	27	0	4	55	874247	874402	1.86e-09
Brhy	TRINITY_DN4257_c0_g1_i1|m.50760		Nuclear genome from Caulerpa lentillifera			Cale_scf_3	41.818	55	29	1	10	64	372827	372672	0.000195
Brhy	TRINITY_DN4257_c0_g1_i1|m.50760		Nuclear genome from Caulerpa lentillifera			Cale_scf_3	41.304	46	22	2	113	157	874235	874360	0.019
Brhy	TRINITY_DN4257_c0_g1_i1|m.50760		Nuclear genome from Caulerpa lentillifera			Cale_scf_3	57.143	28	7	1	130	157	372441	372373	0.033
Brhy	TRINITY_DN4257_c0_g1_i1|m.50760		Nuclear genome from Caulerpa lentillifera			Cale_scf_3	43.478	46	13	1	125	157	874663	874800	0.05
Brhy	TRINITY_DN4257_c0_g1_i1|m.50760		Nuclear genome from Caulerpa lentillifera			Cale_scf_3	33.333	57	37	1	4	60	963399	963566	0.3
Brhy	TRINITY_DN4257_c0_g1_i1|m.50760		Nuclear genome from Caulerpa lentillifera			Cale_scf_3	40	25	15	0	8	32	255749	255675	9.1
Brhy	TRINITY_DN4257_c0_g1_i1|m.50760		Nuclear genome from Caulerpa lentillifera			Cale_scf_26	67.241	116	35	1	1	113	222926	223273	5.47e-47
Brhy	TRINITY_DN4257_c0_g1_i1|m.50760		Nuclear genome from Caulerpa lentillifera			Cale_scf_26	77.586	58	13	0	101	158	223408	223581	3.68e-23
Brhy	TRINITY_DN4257_c0_g1_i1|m.50760		Nuclear genome from Caulerpa lentillifera			Cale_scf_26	33.333	57	37	1	4	60	223468	223635	0.3
Brhy	TRINITY_DN4257_c0_g1_i1|m.50760		Nuclear genome from Caulerpa lentillifera			Cale_scf_6	41.06	151	69	5	11	158	185563	185162	7.45e-23
Brhy	TRINITY_DN4257_c0_g1_i1|m.50760		Nuclear genome from Caulerpa lentillifera			Cale_scf_6	35.294	34	22	0	125	158	185569	185468	0.46
Brhy	TRINITY_DN4257_c0_g1_i1|m.50760		Nuclear genome from Caulerpa lentillifera			Cale_scf_7	37.569	181	79	8	2	157	323861	324376	3.27e-18
Brhy	TRINITY_DN4257_c0_g1_i1|m.50760		Nuclear genome from Caulerpa lentillifera			Cale_scf_7	50	26	13	0	37	62	361859	361782	2.8
Brhy	TRINITY_DN4257_c0_g1_i1|m.50760		Nuclear genome from Caulerpa lentillifera			Cale_scf_34	37.5	104	57	3	1	99	206898	207200	1.42e-13
Brhy	TRINITY_DN4257_c0_g1_i1|m.50760		Nuclear genome from Caulerpa lentillifera			Cale_scf_34	62.857	35	11	2	125	157	207376	207480	9.51e-05
Brhy	TRINITY_DN4257_c0_g1_i1|m.50760		Nuclear genome from Caulerpa lentillifera			Cale_scf_34	43.243	37	20	1	122	157	206910	207020	0.086
Brhy	TRINITY_DN4257_c0_g1_i1|m.50760		Nuclear genome from Caulerpa lentillifera			Cale_scf_23	33.721	172	72	7	1	157	456717	457151	1.82e-13
Brhy	TRINITY_DN4257_c0_g1_i1|m.50760		Nuclear genome from Caulerpa lentillifera			Cale_scf_19	32.407	216	74	10	1	157	25528	26136	1.82e-13
Brhy	TRINITY_DN4257_c0_g1_i1|m.50760		Nuclear genome from Caulerpa lentillifera			Cale_scf_19	28.571	77	44	2	92	157	303174	303404	1.4
Brhy	TRINITY_DN4257_c0_g1_i1|m.50760		Nuclear genome from Caulerpa lentillifera			Cale_scf_19	35.897	39	25	0	8	46	26035	26151	7.8
Brhy	TRINITY_DN4257_c0_g1_i1|m.50760		Nuclear genome from Caulerpa lentillifera			Cale_scf_4	37.5	104	57	3	1	99	1220610	1220912	2.1e-13
Brhy	TRINITY_DN4257_c0_g1_i1|m.50760		Nuclear genome from Caulerpa lentillifera			Cale_scf_4	41.053	95	40	5	68	157	1022429	1022178	9.49e-12
Brhy	TRINITY_DN4257_c0_g1_i1|m.50760		Nuclear genome from Caulerpa lentillifera			Cale_scf_4	28.421	95	24	2	1	51	1022818	1022534	9.49e-12
Brhy	TRINITY_DN4257_c0_g1_i1|m.50760		Nuclear genome from Caulerpa lentillifera			Cale_scf_4	60	35	12	2	125	157	1221088	1221192	0.000214
Brhy	TRINITY_DN4257_c0_g1_i1|m.50760		Nuclear genome from Caulerpa lentillifera			Cale_scf_4	43.243	37	20	1	122	157	1220622	1220732	0.086
Brhy	TRINITY_DN4257_c0_g1_i1|m.50760		Nuclear genome from Caulerpa lentillifera			Cale_scf_14	32.948	173	73	6	1	157	765255	764818	8.65e-13
Brhy	TRINITY_DN4257_c0_g1_i1|m.50760		Nuclear genome from Caulerpa lentillifera			Cale_scf_116	34.211	38	25	0	89	126	948	835	4.8
Brhy	TRINITY_DN4257_c0_g1_i1|m.50760		Nuclear genome from Caulerpa lentillifera			Cale_scf_35	23.404	47	36	0	92	138	112970	112830	5.7
Brhy	TRINITY_DN4496_c0_g1_i1|m.53876		Nuclear genome from Caulerpa lentillifera			Cale_scf_2	72.157	255	70	1	1	254	1132409	1131645	3.13e-121
Brhy	TRINITY_DN4496_c0_g1_i1|m.53876		Nuclear genome from Caulerpa lentillifera			Cale_scf_2	44.978	229	107	5	34	244	747660	748343	6.9e-54
Brhy	TRINITY_DN4496_c0_g1_i1|m.53876		Nuclear genome from Caulerpa lentillifera			Cale_scf_5	72.047	254	70	1	1	254	188661	189419	1.05e-119
Brhy	TRINITY_DN4496_c0_g1_i1|m.53876		Nuclear genome from Caulerpa lentillifera			Cale_scf_5	42.478	226	111	5	37	244	441837	441163	4e-46
Brhy	TRINITY_DN4496_c0_g1_i1|m.53876		Nuclear genome from Caulerpa lentillifera			Cale_scf_24	67.164	268	71	1	3	253	434292	435095	5.03e-116
Brhy	TRINITY_DN4496_c0_g1_i1|m.53876		Nuclear genome from Caulerpa lentillifera			Cale_scf_15	75	232	58	0	23	254	510197	509502	1.14e-115
Brhy	TRINITY_DN4496_c0_g1_i1|m.53876		Nuclear genome from Caulerpa lentillifera			Cale_scf_17	64.981	257	73	1	16	255	26053	25283	9.31e-108
Brhy	TRINITY_DN4496_c0_g1_i1|m.53876		Nuclear genome from Caulerpa lentillifera			Cale_scf_21	72.512	211	58	0	45	255	36914	36282	9.91e-101
Brhy	TRINITY_DN4496_c0_g1_i1|m.53876		Nuclear genome from Caulerpa lentillifera			Cale_scf_21	70	20	6	0	26	45	37024	36965	0.023
Brhy	TRINITY_DN4496_c0_g1_i1|m.53876		Nuclear genome from Caulerpa lentillifera			Cale_scf_21	25.581	43	32	0	126	168	386484	386612	2.9
Brhy	TRINITY_DN4496_c0_g1_i1|m.53876		Nuclear genome from Caulerpa lentillifera			Cale_scf_10	71.041	221	62	2	35	254	612707	613366	1.33e-98
Brhy	TRINITY_DN4496_c0_g1_i1|m.53876		Nuclear genome from Caulerpa lentillifera			Cale_scf_13	63.281	256	70	5	14	254	523405	524145	4.48e-96
Brhy	TRINITY_DN4496_c0_g1_i1|m.53876		Nuclear genome from Caulerpa lentillifera			Cale_scf_3	69.531	128	39	0	25	152	962783	963166	3.73e-58
Brhy	TRINITY_DN4496_c0_g1_i1|m.53876		Nuclear genome from Caulerpa lentillifera			Cale_scf_3	66.355	107	36	0	148	254	963324	963644	2.21e-40
Brhy	TRINITY_DN4496_c0_g1_i1|m.53876		Nuclear genome from Caulerpa lentillifera			Cale_scf_3	50.538	93	32	2	173	251	874648	874926	2.8e-19
Brhy	TRINITY_DN4496_c0_g1_i1|m.53876		Nuclear genome from Caulerpa lentillifera			Cale_scf_3	53.03	66	26	1	182	247	372441	372259	1.57e-14
Brhy	TRINITY_DN4496_c0_g1_i1|m.53876		Nuclear genome from Caulerpa lentillifera			Cale_scf_3	48.077	52	27	0	56	107	874247	874402	2.11e-08
Brhy	TRINITY_DN4496_c0_g1_i1|m.53876		Nuclear genome from Caulerpa lentillifera			Cale_scf_3	39.13	46	28	0	55	100	372848	372711	0.014
Brhy	TRINITY_DN4496_c0_g1_i1|m.53876		Nuclear genome from Caulerpa lentillifera			Cale_scf_3	34.091	44	28	1	178	220	874262	874393	0.025
Brhy	TRINITY_DN4496_c0_g1_i1|m.53876		Nuclear genome from Caulerpa lentillifera			Cale_scf_26	70.312	128	38	0	25	152	222842	223225	4.7e-58
Brhy	TRINITY_DN4496_c0_g1_i1|m.53876		Nuclear genome from Caulerpa lentillifera			Cale_scf_26	69	100	31	0	154	253	223411	223710	3.03e-40
[truncated: 11,362 more rows]
