# Supplementary material for: Chloroplast acquisition without the gene transfer in kleptoplastic sea slugs, Plakobranchus ocellatus
Source: eLife journal article supplement (doi:10.7554/elife.60176), 2021-04-26
Supplement: fig5-data2 [file 5_CAFE_result.xlsx]

## Sheet: Sheet1
Rapidity expanded/contracted orthogroups by CAFE analysis
The labeled CAFE tree:((Mmu<0>,Hsa<2>)<1>,((((((((Eor<4>,Poc<6>)<5>,Bgl<8>)<7>,Aca<10>)<9>,(Hdi<12>,Lgi<14>)<13>)<11>,Obi<16>)<15>,(Cgi<18>,Pfu<20>)<19>)<17>,Cte<22>)<21>,((Bmo<24>,Dme<26>)<25>,Api<28>)<27>)<23>)<3>
Node ID	Aasigned OGs [change of gene number]
Overall rapid :	OG0005218,OG0010656,OG0009760,OG0006236,OG0009184,OG0008534,OG0005302,OG0002941,OG0003471,OG0005601,OG0010649,OG0010705,OG0010709,OG0009471,OG0010328,OG0009181,OG0002751,OG0005603,OG0000372,OG0008536,OG0004003,OG0002481,OG0010113,OG0010364,OG0010365,OG0006271,OG0004581,OG0002913,OG0003217,OG0001464,OG0001287,OG0003362,OG0001176,OG0002356,OG0002554,OG0000909,OG0007788,OG0009180,OG0005605,OG0009366…
Obi<16>:	OG0001176[+5*],OG0000477[+8*],OG0000695[+6*],OG0000479[+9*],OG0000364[+9*],OG0000555[+13*],OG0000328[+8*],OG0006877[+18*],OG0000544[+7*],OG0000672[+12*],OG0000718[+7*],OG0002666[+17*],OG0000430[+14*],OG0000610[+15*],OG0000915[+7*],OG0000593[+11*],OG0000740[+11*],OG0000913[+14*],OG0000816[+9*],OG0001292[+10*],OG0000932[+10*],OG0000724[+6*],OG0000460[+10*],OG0000461[+11*],OG0000408[+19*],OG0000457[…
Bmo-Dme<25>:	OG0000801[+4*],OG0001014[+6*]
Lophotrochozoa<21>:	OG0001719[+2*],OG0000848[+2*],OG0000868[+2*],OG0000934[+2*],OG0000914[+2*],OG0001322[+2*],OG0001292[+3*],OG0000511[+3*],OG0000657[+2*],OG0000501[+3*],OG0000580[+3*],OG0001500[+2*],OG0000311[+4*],OG0000241[+4*],OG0000293[+4*],OG0000495[+2*],OG0000658[+2*],OG0000373[+4*],OG0000221[+6*],OG0000256[+3*],OG0000314[+5*],OG0000224[+3*],OG0000281[+3*],OG0000502[+2*],OG0000220[+6*],OG0000692[-3*],OG0000521…
Poc<6>:	OG0010656[+7*],OG0009760[+7*],OG0006236[+6*],OG0009184[+9*],OG0008534[+7*],OG0005302[+7*],OG0002941[+3*],OG0003471[+7*],OG0005601[+3*],OG0010649[+10*],OG0010705[+10*],OG0010709[+10*],OG0002751[+3*],OG0008536[+10*],OG0010364[+10*],OG0010365[+10*],OG0006271[+2*],OG0004581[+7*],OG0001464[+4*],OG0003362[+6*],OG0001176[+6*],OG0002356[+11*],OG0002554[+4*],OG0007788[+6*],OG0005605[+6*],OG0009366[+10*],O…
P-E<5>:	OG0008534[+2*],OG0002554[+4*],OG0005605[+5*],OG0009366[+2*],OG0006740[+3*],OG0006852[+4*],OG0009179[+3*],OG0003414[+2*],OG0009182[+2*],OG0008425[+3*],OG0002212[+5*],OG0006433[+3*],OG0006871[+6*],OG0007879[+4*],OG0003949[+5*],OG0001255[+3*],OG0008545[+2*],OG0004439[+7*],OG0002616[+9*],OG0004438[+10*],OG0002907[+6*],OG0007554[+2*],OG0006865[+3*],OG0005611[+9*],OG0008546[+2*],OG0008182[+2*],OG000736…
Ecdysozoa<27>:	OG0000841[+5*],OG0000875[+5*],OG0000527[+7*],OG0000355[+7*],OG0000751[+9*],OG0000801[+4*],OG0002073[+3*],OG0000692[+6*],OG0000333[+7*],OG0000449[+10*],OG0000521[+13*],OG0000100[+11*],OG0001014[+6*],OG0000117[+13*],OG0000457[-4*],OG0000241[-6*],OG0000293[-4*],OG0000218[-5*],OG0000306[-4*],OG0000221[-5*],OG0000134[-7*],OG0000314[-4*],OG0000109[-6*],OG0000220[-7*]
<23>:
Bgl<8>:	OG0005601[+6*],OG0002913[+4*],OG0001464[+4*],OG0000909[+6*],OG0007788[+5*],OG0003021[+9*],OG0001628[+11*],OG0000784[+6*],OG0004183[+7*],OG0005577[+7*],OG0000992[+9*],OG0001186[+7*],OG0001577[+7*],OG0000589[+7*],OG0000877[+6*],OG0002303[+14*],OG0002662[+6*],OG0001580[+10*],OG0006403[+11*],OG0001772[+5*],OG0001234[+4*],OG0001369[+9*],OG0002192[+5*],OG0001018[+6*],OG0001583[+8*],OG0003109[+8*],OG000…
Dme<26>:	OG0000372[+7*],OG0004003[+5*],OG0001464[+9*],OG0001176[+8*],OG0000935[+5*],OG0001628[+5*],OG0000844[+11*],OG0003395[+12*],OG0000992[+10*],OG0001577[+5*],OG0000589[+8*],OG0001772[+13*],OG0001018[+8*],OG0001347[+12*],OG0000910[+5*],OG0000772[+10*],OG0000773[+9*],OG0000998[+9*],OG0001462[+8*],OG0002961[+14*],OG0000564[+7*],OG0000591[+9*],OG0000969[+14*],OG0000613[+11*],OG0000479[+6*],OG0000930[+5*],…
Eor<4>:	OG0009471[+8*],OG0010328[+9*],OG0009181[+9*],OG0005603[+7*],OG0000372[+6*],OG0002481[+8*],OG0010113[+11*],OG0009180[+11*],OG0009911[+11*],OG0007345[+7*],OG0001824[+11*],OG0006852[+9*],OG0002135[+5*],OG0001186[+5*],OG0007896[+13*],OG0006424[+13*],OG0002658[+8*],OG0003377[+12*],OG0001980[+10*],OG0008874[+15*],OG0004439[+8*],OG0002173[+16*],OG0005611[+5*],OG0008182[+15*],OG0000392[+6*],OG0007801[+18…
Lgi<14>:	OG0008534[+3*],OG0005603[+8*],OG0003217[+8*],OG0003362[+6*],OG0003219[+7*],OG0001719[+6*],OG0002662[+8*],OG0000626[+8*],OG0002961[+4*],OG0005612[+16*],OG0000453[+12*],OG0001291[+8*],OG0001082[+17*],OG0001288[+11*],OG0001453[+8*],OG0002067[+12*],OG0000704[+6*],OG0002213[+13*],OG0001295[+11*],OG0001113[+4*],OG0000387[+13*],OG0001417[+11*],OG0000748[+10*],OG0000916[+7*],OG0000657[+9*],OG0001551[+3*]…
Bmo<24>:	OG0000464[+16*],OG0000692[+32*],OG0000449[+25*],OG0000196[+11*],OG0001014[+39*],OG0000283[-11*],OG0000116[-9*],OG0000111[-12*]
Api<28>:	OG0002481[+6*],OG0001302[+9*],OG0001734[+11*],OG0000585[+7*],OG0001338[+16*],OG0000774[+6*],OG0004085[+23*],OG0000661[+19*],OG0001115[+24*],OG0001233[+23*],OG0001551[+13*],OG0003621[+27*],OG0000448[+11*],OG0001647[+11*],OG0001866[+29*],OG0001010[+12*],OG0002691[+31*],OG0001863[+31*],OG0002683[+32*],OG0001993[+29*],OG0000355[+14*],OG0000810[+27*],OG0000751[+22*],OG0002389[+36*],OG0002073[+35*],OG0…
Gastropoda<11>:	OG0001987[+2*],OG0001884[+2*],OG0001226[+2*],OG0001625[+2*],OG0001453[+2*],OG0000657[+4*],OG0000847[+2*],OG0000260[+5*],OG0000866[+3*],OG0001003[+4*],OG0000361[+3*],OG0000987[+2*],OG0000500[+3*],OG0000666[+4*],OG0000209[+6*]
Aca<10>:	OG0002941[+5*],OG0004003[+8*],OG0001287[+6*],OG0000909[+4*],OG0000935[+4*],OG0001480[+9*],OG0003395[+7*],OG0001574[+7*],OG0005888[+7*],OG0004526[+7*],OG0006317[+13*],OG0006766[+9*],OG0002192[+7*],OG0001018[+5*],OG0001347[+4*],OG0005148[+14*],OG0002901[+13*],OG0000848[+5*],OG0001919[+3*],OG0000477[+8*],OG0006332[+17*],OG0000453[+6*],OG0000353[+9*],OG0000868[+9*],OG0003364[+10*],OG0003369[+17*],OG0…
Hsa<2>:	OG0005218[+3*],OG0001921[+10*],OG0001343[+11*],OG0000965[+4*],OG0000060[+10*],OG0001036[+17*],OG0001030[+22*],OG0001165[+22*]
<13>:	OG0002911[+3*],OG0001288[+4*],OG0001453[+4*],OG0002067[+4*],OG0001192[+3*],OG0001524[+3*],OG0004051[+3*],OG0001417[+3*],OG0000748[+4*],OG0002465[+2*],OG0002301[+7*],OG0001003[+4*],OG0000361[+5*],OG0000635[+4*],OG0000549[+3*],OG0001327[+6*],OG0000500[+5*],OG0000956[+7*],OG0001328[+4*],OG0001329[+7*],OG0001452[+6*],OG0001052[+9*],OG0000214[+9*],OG0000209[+11*]
Cgi<18>:	OG0001287[+9*],OG0000909[+7*],OG0000935[+8*],OG0000955[+6*],OG0001480[+4*],OG0000784[+10*],OG0000844[+6*],OG0001574[+11*],OG0001577[+10*],OG0000589[+7*],OG0003414[+7*],OG0000877[+10*],OG0001734[+8*],OG0001580[+8*],OG0001234[+14*],OG0002192[+7*],OG0001018[+7*],OG0001347[+7*],OG0000910[+13*],OG0000773[+12*],OG0000998[+11*],OG0001050[+8*],OG0000445[+7*],OG0001919[+13*],OG0001203[+13*],OG0000564[+12*…
Mollusca <17>:	OG0000900[+2*],OG0001291[+2*],OG0000884[+3*],OG0002067[+2*],OG0001417[+2*],OG0000748[+3*],OG0000546[+4*],OG0000744[+2*],OG0000733[+3*],OG0000495[+5*],OG0000343[+4*],OG0000549[+3*],OG0000675[+4*],OG0000384[+5*],OG0000474[+4*],OG0000533[+3*],OG0000194[+4*],OG0000393[+6*],OG0000133[+5*],OG0000224[+7*],OG0000427[+2*],OG0000281[+7*],OG0000462[+3*],OG0000504[+2*]
<15>:
Bivalvia<19>:	OG0003414[+3*],OG0001787[+3*],OG0000639[+4*],OG0002380[+6*],OG0002213[+5*],OG0000908[+4*],OG0001192[+3*],OG0004591[+5*],OG0001857[+6*],OG0001840[+3*],OG0000894[+7*],OG0001201[+3*],OG0001189[+3*],OG0000774[+7*],OG0000292[+5*],OG0001006[+6*],OG0002659[+7*],OG0000491[+5*],OG0001495[+5*],OG0000234[+8*],OG0001499[+5*],OG0000835[+5*],OG0001724[+9*],OG0000290[+8*],OG0003827[+5*],OG0000547[+6*],OG0000916…
Heterobranchia <9>:	OG0003021[+3*],OG0004183[+3*],OG0005888[+3*],OG0002658[+3*],OG0006403[+3*],OG0004526[+4*],OG0006766[+4*],OG0003109[+3*],OG0002901[+3*],OG0005161[+3*],OG0003364[+6*],OG0001060[+4*],OG0001182[+6*],OG0001625[+4*],OG0002925[+4*],OG0000510[+6*],OG0001048[+4*],OG0000398[+5*],OG0002056[+6*],OG0002279[+4*],OG0000511[+6*],OG0000716[+8*],OG0000255[+8*],OG0003055[+5*],OG0000280[+7*],OG0001621[+10*],OG000198…
Cte<22>:	OG0002913[+7*],OG0007345[+11*],OG0001719[+9*],OG0002616[+6*],OG0001985[+11*],OG0001416[+11*],OG0002671[+8*],OG0000683[+17*],OG0001989[+7*],OG0001758[+16*],OG0001113[+18*],OG0001292[+12*],OG0000390[+20*],OG0000418[+18*],OG0000937[+7*],OG0004499[+25*],OG0000280[+11*],OG0000188[+16*],OG0000916[+11*],OG0000583[+24*],OG0000847[+6*],OG0001051[+10*],OG0000501[+12*],OG0000842[+18*],OG0000580[+22*],OG0000…
Hdi<12>:	OG0009471[+6*],OG0002751[+5*],OG0006271[+11*],OG0004581[+6*],OG0002554[+4*],OG0005605[+3*],OG0002557[+7*],OG0000955[+6*],OG0003289[+4*],OG0001987[+6*],OG0002212[+6*],OG0005148[+5*],OG0005989[+13*],OG0001958[+13*],OG0004253[+15*],OG0000848[+7*],OG0001413[+9*],OG0002616[+3*],OG0001985[+11*],OG0001416[+11*],OG0003603[+15*],OG0001226[+14*],OG0004872[+18*],OG0002380[+10*],OG0002666[+6*],OG0000587[+7*]…
Mmu<0>:	OG0005218[-2*],OG0000350[-3*],OG0001921[-6*],OG0001343[-5*],OG0000060[-8*],OG0001036[-9*],OG0001030[-12*],OG0001165[-11*]
Pfu<20>:	OG0009760[+5*],OG0002557[+5*],OG0002658[+3*],OG0003949[+3*],OG0001980[+4*],OG0005989[+9*],OG0004872[+6*],OG0001291[+6*],OG0002067[+5*],OG0001292[+7*],OG0001417[+14*],OG0000149[+9*],OG0001724[+11*],OG0000290[+12*],OG0000583[+10*],OG0000496[+10*],OG0000809[+9*],OG0002783[+25*],OG0003224[+23*],OG0001792[+3*],OG0000954[+11*],OG0000627[+12*],OG0001500[+25*],OG0001898[+26*],OG0001679[+27*],OG0000161[+1…
<1>:	OG0001343[+9*],OG0001036[+14*],OG0001030[+10*],OG0001165[+9*],OG0000122[-10*],OG0000111[-12*],OG0000117[-13*]
Panpulmonata <7>:	OG0003109[+2*],OG0002925[+2*],OG0001988[+3*],OG0002208[+2*]
