# Supplementary material for: Chloroplast acquisition without the gene transfer in kleptoplastic sea slugs, Plakobranchus ocellatus
Source: eLife journal article supplement (doi:10.7554/elife.60176), 2021-04-26
Supplement: fig5-data2 [file 6_gene_family_history_analyses_results.xlsx]

## Sheet: Sheet1
Gene number of each orthologous groups by OrthoFinder, and the result of our gene family history analyses													38	0
Orthogroup ID	Adapted gene family history analysis				DEG analysis (PN vs DG)			CAFE results					Z score analysis			Gene number from each species																				Z-score of each gene number
	CAFE analysis (OGs having no species > 100 genes ))	Z score (OGs having a species > 100 genes )	Excluded (OGs only found from single species or no inter-species size change)		# of Up regulated genes on DG	# of Down regulated genes on DG		Contructed on PE clade	Expanded on PE clade	Contructed on Poc clade	Expanded on Poc clade		Expanded group on Poc (>2 Z-score on Poc )	Contracted group on Poc (<-2 Z-score on Poc )		Poc	Eor	Bgl	Aca	Lgi	Hdi	Obi	Pfu	Cgi	Cte	Dme	Bmo	Api	Mmu	Hsa	Bfl	Lan	Dre			Poc	Eor	Bgl	Aca	Lgi	Hdi	Obi	Pfu	Cgi	Cte	Dme	Bmo	Api	Mmu
OG0000132	N	Y	N		45	0		NA	NA	NA	NA		Y	N		203	5	4	5	3	0	2	1	2	1	19	3	3	7	8	5	3	17			3.72682	-0.256143	-0.276259	-0.256143	-0.296375	-0.356723	-0.316491	-0.336607	-0.316491	-0.336607	0.0254802	-0.296375	-0.296375	-0.215911
OG0000005	N	Y	N		18	16		NA	NA	NA	NA		Y	N		367	213	156	47	61	91	10	165	276	124	28	11	3	44	38	405	134	104			2.46972	0.995929	0.450433	-0.592708	-0.458727	-0.171624	-0.946802	0.536564	1.59885	0.14419	-0.77454	-0.937232	-1.01379	-0.621419
OG0000002	N	Y	N		2	0		NA	NA	NA	NA		Y	N		1850	1763	10	11	7	26	44	19	25	33	2	15	188	4	5	19	14	56			2.61374	2.47011	-0.423956	-0.422305	-0.428909	-0.397541	-0.367825	-0.409098	-0.399192	-0.385985	-0.437163	-0.415702	-0.130092	-0.433862
OG0000001	N	Y	N		0	0		NA	NA	NA	NA		Y	N		2106	1037	76	83	33	304	137	312	129	133	65	31	746	3	2	1	44	10			3.20238	1.25678	-0.492254	-0.479514	-0.570515	-0.0772901	-0.381233	-0.06273	-0.395793	-0.388513	-0.512275	-0.574155	0.727158	-0.625116
OG0000003	N	Y	N		0	0		NA	NA	NA	NA		Y	N		1565	1403	19	20	17	33	157	64	16	71	10	26	135	4	6	6	15	23			2.69906	2.36995	-0.441649	-0.439617	-0.445712	-0.413208	-0.161301	-0.350231	-0.447744	-0.336011	-0.459933	-0.427428	-0.205995	-0.472122
OG0000007	N	Y	N		0	0		NA	NA	NA	NA		Y	N		671	536	56	56	0	8	32	8	9	46	0	19	59	0	0	11	18	0			2.85262	2.17819	-0.219817	-0.219817	-0.499584	-0.459617	-0.339717	-0.459617	-0.454621	-0.269775	-0.499584	-0.404663	-0.204829	-0.499584
OG0000012	N	Y	N		0	0		NA	NA	NA	NA		Y	N		487	217	26	55	7	19	29	5	23	6	1	20	202	1	6	1	6	11			3.20354	1.11124	-0.368865	-0.144136	-0.516101	-0.42311	-0.345617	-0.531599	-0.392113	-0.52385	-0.562596	-0.41536	0.995005	-0.562596
OG0000013	N	Y	N		0	0		NA	NA	NA	NA		Y	N		389	482	23	18	13	11	33	9	6	36	0	4	32	1	1	6	6	2			2.20215	2.84523	-0.328686	-0.36326	-0.397835	-0.411664	-0.259538	-0.425494	-0.446239	-0.238793	-0.487728	-0.460068	-0.266452	-0.480813
OG0000015	N	Y	N		0	0		NA	NA	NA	NA		Y	N		927	21	5	8	2	2	3	3	4	3	5	4	6	3	3	3	6	8			3.74094	-0.198264	-0.267831	-0.254787	-0.280875	-0.280875	-0.276527	-0.276527	-0.272179	-0.276527	-0.267831	-0.272179	-0.263483	-0.276527
OG0000027	N	Y	N		0	0		NA	NA	NA	NA		Y	N		214	147	24	36	11	36	10	17	19	37	1	20	155	1	8	13	4	7			2.58232	1.53332	-0.392463	-0.204582	-0.596001	-0.204582	-0.611658	-0.50206	-0.470747	-0.188925	-0.752569	-0.45509	1.65857	-0.752569
OG0000030	N	Y	N		0	0		NA	NA	NA	NA		Y	N		354	109	1	17	42	7	1	6	1	13	1	9	174	0	0	0	0	0			3.22876	0.635167	-0.508133	-0.338756	-0.0741028	-0.444617	-0.508133	-0.455203	-0.508133	-0.3811	-0.508133	-0.423444	1.32326	-0.518719
OG0000032	N	Y	N		0	0		NA	NA	NA	NA		Y	N		374	142	1	12	6	6	0	5	0	4	5	11	117	1	0	0	0	1			3.36408	0.987507	-0.456876	-0.344193	-0.405657	-0.405657	-0.46712	-0.4159	-0.46712	-0.426144	-0.4159	-0.354437	0.731411	-0.456876
OG0000036	N	Y	N		0	0		NA	NA	NA	NA		Y	N		608	8	6	3	0	1	4	0	0	1	1	1	0	1	1	1	1	1			3.74123	-0.227075	-0.240303	-0.260144	-0.279986	-0.273372	-0.25353	-0.279986	-0.279986	-0.273372	-0.273372	-0.273372	-0.279986	-0.273372
OG0000061	N	Y	N		0	0		NA	NA	NA	NA		Y	N		243	208	5	13	1	1	1	3	5	12	0	0	7	3	3	10	2	6			2.76859	2.30569	-0.379138	-0.273332	-0.432041	-0.432041	-0.432041	-0.405589	-0.379138	-0.286558	-0.445267	-0.445267	-0.352687	-0.405589
OG0000172	N	Y	N		0	0		NA	NA	NA	NA		Y	N		193	6	5	2	5	5	2	2	1	1	1	1	1	2	2	1	9	5			3.73926	-0.194958	-0.215996	-0.279112	-0.215996	-0.215996	-0.279112	-0.279112	-0.300151	-0.300151	-0.300151	-0.300151	-0.300151	-0.279112
OG0000271	N	Y	N		0	0		NA	NA	NA	NA		Y	N		114	37	1	1	1	2	0	1	1	1	1	0	11	1	1	1	1	2			3.54902	0.88206	-0.364831	-0.364831	-0.364831	-0.330195	-0.399467	-0.364831	-0.364831	-0.364831	-0.364831	-0.399467	-0.0184725	-0.364831
OG0000008	N	Y	N		0	0		NA	NA	NA	NA		Y	N		541	332	312	283	1	11	0	6	1	2	0	0	0	0	0	0	0	0			2.60085	1.3703	1.25254	1.08179	-0.578578	-0.5197	-0.584466	-0.549139	-0.578578	-0.57269	-0.584466	-0.584466	-0.584466	-0.584466
OG0000016	N	Y	N		0	1		NA	NA	NA	NA		Y	N		456	279	10	3	23	1	0	1	0	28	0	1	207	0	0	0	0	0			2.94035	1.60153	-0.43316	-0.486108	-0.334829	-0.501236	-0.508799	-0.501236	-0.508799	-0.29701	-0.508799	-0.501236	1.05693	-0.508799
OG0000042	N	Y	N		0	0		NA	NA	NA	NA		Y	N		209	214	6	8	23	2	0	0	0	11	1	2	128	0	0	0	2	0			2.27798	2.34548	-0.462616	-0.435615	-0.233108	-0.516618	-0.543618	-0.543618	-0.543618	-0.395113	-0.530118	-0.516618	1.18444	-0.543618
OG0000048	N	Y	N		0	0		NA	NA	NA	NA		Y	N		424	117	0	1	0	2	2	3	0	0	0	0	12	0	0	0	0	0			3.60354	0.741961	-0.34861	-0.339289	-0.34861	-0.329967	-0.329967	-0.320646	-0.34861	-0.34861	-0.34861	-0.34861	-0.236756	-0.34861
OG0000068	N	Y	N		0	0		NA	NA	NA	NA		Y	N		353	73	0	16	0	0	7	4	1	0	0	1	4	0	0	0	0	1			3.66251	0.48167	-0.34762	-0.165858	-0.34762	-0.34762	-0.268099	-0.30218	-0.33626	-0.34762	-0.34762	-0.33626	-0.30218	-0.34762
OG0000079	N	Y	N		0	0		NA	NA	NA	NA		Y	N		207	93	0	0	17	62	0	17	1	2	0	1	2	0	0	16	0	0			3.28428	1.20655	-0.488451	-0.488451	-0.178613	0.641547	-0.488451	-0.178613	-0.470225	-0.451999	-0.488451	-0.470225	-0.451999	-0.488451
OG0000080	N	Y	N		0	0		NA	NA	NA	NA		Y	N		291	83	22	0	2	1	0	4	6	0	0	0	0	1	1	0	5	0			3.59043	0.757314	-0.0735521	-0.373209	-0.345967	-0.359588	-0.373209	-0.318726	-0.291484	-0.373209	-0.373209	-0.373209	-0.373209	-0.359588
OG0000082	N	Y	N		0	0		NA	NA	NA	NA		Y	N		271	122	4	0	0	2	0	4	7	2	0	0	3	0	0	0	0	0			3.39756	1.31714	-0.330448	-0.386298	-0.386298	-0.358373	-0.386298	-0.330448	-0.28856	-0.358373	-0.386298	-0.386298	-0.34441	-0.386298
OG0000156	N	Y	N		0	0		NA	NA	NA	NA		Y	N		186	68	1	4	0	1	2	0	0	0	0	0	0	0	0	0	0	0			3.50575	1.05117	-0.342532	-0.280127	-0.363334	-0.342532	-0.32173	-0.363334	-0.363334	-0.363334	-0.363334	-0.363334	-0.363334	-0.363334
OG0000167	N	Y	N		0	0		NA	NA	NA	NA		Y	N		167	45	0	1	1	2	0	19	2	6	0	0	0	0	0	4	3	1			3.59562	0.686696	-0.386266	-0.362423	-0.362423	-0.338579	-0.386266	0.0667621	-0.338579	-0.243205	-0.386266	-0.386266	-0.386266	-0.386266
OG0000169	N	Y	N		0	0		NA	NA	NA	NA		Y	N		129	74	8	16	4	2	0	0	0	9	0	0	1	0	0	0	4	0			3.2031	1.6413	-0.232849	-0.00567925	-0.346434	-0.403227	-0.460019	-0.460019	-0.460019	-0.204453	-0.460019	-0.460019	-0.431623	-0.460019
OG0000190	N	Y	N		0	0		NA	NA	NA	NA		Y	N		193	35	0	0	1	0	1	1	1	0	0	0	0	0	0	0	0	0			3.68109	0.405017	-0.320696	-0.320696	-0.299961	-0.320696	-0.299961	-0.299961	-0.299961	-0.320696	-0.320696	-0.320696	-0.320696	-0.320696
OG0000195	N	Y	N		0	0		NA	NA	NA	NA		Y	N		172	45	0	1	0	0	0	2	0	0	0	0	0	0	0	0	0	0			3.61663	0.697274	-0.337143	-0.314156	-0.337143	-0.337143	-0.337143	-0.291169	-0.337143	-0.337143	-0.337143	-0.337143	-0.337143	-0.337143
OG0000230	N	Y	N		0	0		NA	NA	NA	NA		Y	N		187	1	0	0	0	2	0	0	1	0	1	0	0	0	0	0	0	0			3.74136	-0.253433	-0.27491	-0.27491	-0.27491	-0.231956	-0.27491	-0.27491	-0.253433	-0.27491	-0.253433	-0.27491	-0.27491	-0.27491
OG0000266	N	Y	N		0	0		NA	NA	NA	NA		Y	N		145	17	0	0	0	10	0	5	0	0	0	0	0	0	0	0	2	0			3.70856	0.144778	-0.328536	-0.328536	-0.328536	-0.0501156	-0.328536	-0.189326	-0.328536	-0.328536	-0.328536	-0.328536	-0.328536	-0.328536
OG0000307	N	Y	N		0	0		NA	NA	NA	NA		Y	N		155	0	1	0	2	1	0	1	0	0	0	0	0	0	0	3	0	0			3.74122	-0.276487	-0.250567	-0.276487	-0.224646	-0.250567	-0.276487	-0.250567	-0.276487	-0.276487	-0.276487	-0.276487	-0.276487	-0.276487
OG0000319	N	Y	N		0	0		NA	NA	NA	NA		Y	N		120	17	4	6	0	1	0	0	0	0	0	0	0	0	0	8	0	0			3.70115	0.239724	-0.197156	-0.129944	-0.33158	-0.297974	-0.33158	-0.33158	-0.33158	-0.33158	-0.33158	-0.33158	-0.33158	-0.33158
OG0000324	N	Y	N		0	0		NA	NA	NA	NA		Y	N		106	26	0	4	0	1	0	1	0	3	0	0	12	0	0	0	0	0			3.61704	0.596548	-0.385113	-0.234088	-0.385113	-0.347357	-0.385113	-0.347357	-0.385113	-0.271845	-0.385113	-0.385113	0.0679612	-0.385113
OG0000367	N	Y	N		0	0		NA	NA	NA	NA		Y	N		110	28	0	1	0	0	0	1	0	0	0	0	0	0	0	0	0	0			3.62318	0.671847	-0.335924	-0.299932	-0.335924	-0.335924	-0.335924	-0.299932	-0.335924	-0.335924	-0.335924	-0.335924	-0.335924	-0.335924
OG0000379	N	Y	N		0	0		NA	NA	NA	NA		Y	N		127	1	1	0	3	4	0	1	0	0	0	0	0	0	0	1	0	0			3.73904	-0.258011	-0.258011	-0.289733	-0.194565	-0.162843	-0.289733	-0.258011	-0.289733	-0.289733	-0.289733	-0.289733	-0.289733	-0.289733
OG0000415	N	Y	N		0	0		NA	NA	NA	NA		Y	N		100	21	0	6	2	0	0	0	0	0	0	0	0	0	0	0	0	0			3.65666	0.49609	-0.344062	-0.104019	-0.264048	-0.344062	-0.344062	-0.344062	-0.344062	-0.344062	-0.344062	-0.344062	-0.344062	-0.344062
OG0000520	N	Y	N		0	0		NA	NA	NA	NA		Y	N		104	5	0	0	0	0	0	0	0	0	0	0	0	0	0	0	0	0			3.73733	-0.0875736	-0.280751	-0.280751	-0.280751	-0.280751	-0.280751	-0.280751	-0.280751	-0.280751	-0.280751	-0.280751	-0.280751	-0.280751
OG0000009	N	Y	N		2	6		NA	NA	NA	NA		N	N		144	154	63	99	10	22	9	110	190	122	35	3	2	13	14	169	76	71			1.25185	1.41234	-0.048148	0.529628	-0.898763	-0.706171	-0.914813	0.706171	1.99012	0.898763	-0.49753	-1.01111	-1.02716	-0.850615
OG0000028	N	Y	N		1	0		NA	NA	NA	NA		N	N		24	23	45	24	39	18	16	43	104	77	14	10	6	8	9	178	89	29			-0.248782	-0.2861	0.534882	-0.248782	0.310978	-0.472687	-0.547321	0.460247	2.73661	1.72904	-0.621956	-0.771225	-0.920495	-0.84586
OG0000000	N	Y	N		0	0		NA	NA	NA	NA		N	N		104	78	222	119	164	119	1103	72	72	132	121	79	252	78	429	722	144	1386			-0.412859	-0.51451	0.0484796	-0.354214	-0.17828	-0.354214	3.49288	-0.537968	-0.537968	-0.303389	-0.346395	-0.5106	0.165769	-0.51451
OG0000004	N	Y	N		0	0		NA	NA	NA	NA		N	N		246	611	8	31	21	15	23	149	10	397	30	18	1139	0	0	5	1	6			0.214247	1.39671	-0.556783	-0.482272	-0.514668	-0.534106	-0.508189	-0.0999963	-0.550304	0.70343	-0.485511	-0.524387	3.10723	-0.5827
OG0000006	N	Y	N		0	0		NA	NA	NA	NA		N	N		26	3	5	11	4	40	25	40	28	57	0	2	1279	1	6	4	29	13			-0.240573	-0.31357	-0.307223	-0.28818	-0.310397	-0.19614	-0.243747	-0.19614	-0.234226	-0.142186	-0.323092	-0.316744	3.73618	-0.319918
OG0000010	N	Y	N		0	0		NA	NA	NA	NA		N	N		35	25	59	52	36	17	45	39	28	35	332	61	36	79	69	88	38	212			-0.382564	-0.518225	-0.0569776	-0.15194	-0.368998	-0.626754	-0.246903	-0.3283	-0.477527	-0.382564	3.64657	-0.0298454	-0.368998	0.214344
OG0000011	N	Y	N		0	0		NA	NA	NA	NA		N	N		76	47	137	47	40	200	55	34	97	173	32	10	10	17	20	71	98	50			0.167443	-0.334885	1.22406	-0.334885	-0.456137	2.31533	-0.196312	-0.560067	0.531198	1.84764	-0.59471	-0.975787	-0.975787	-0.854535
OG0000014	N	Y	N		0	3		NA	NA	NA	NA		N	N		70	131	125	9	49	73	7	40	394	4	3	1	33	0	1	87	3	0			0.0746923	0.695997	0.634885	-0.546612	-0.139199	0.105248	-0.566983	-0.230867	3.37473	-0.597539	-0.607724	-0.628094	-0.302164	-0.63828
OG0000017	N	Y	N		0	0		NA	NA	NA	NA		N	N		16	164	5	4	3	123	4	38	30	4	6	3	569	0	0	10	1	0			-0.340315	0.696035	-0.417341	-0.424343	-0.431346	0.408938	-0.424343	-0.186263	-0.242282	-0.424343	-0.410339	-0.431346	3.53199	-0.452353
OG0000019	N	Y	N		0	0		NA	NA	NA	NA		N	N		43	60	0	2	11	114	0	74	130	23	9	13	429	0	0	0	49	0			-0.16431	-0.00499802	-0.567276	-0.548533	-0.464191	0.501052	-0.567276	0.1262	0.650992	-0.351736	-0.482934	-0.445449	3.45301	-0.567276
OG0000020	N	Y	N		0	0		NA	NA	NA	NA		N	N		36	61	80	79	28	55	49	99	140	39	4	1	0	8	8	64	136	46			-0.247749	0.384263	0.864593	0.839312	-0.449993	0.23258	0.0808975	1.34492	2.38142	-0.171907	-1.05672	-1.13257	-1.15785	-0.955602
OG0000023	N	Y	N		0	0		NA	NA	NA	NA		N	N		191	47	2	5	3	7	0	11	3	64	2	5	518	0	1	1	2	0			1.01157	-0.0776583	-0.418044	-0.395351	-0.41048	-0.380223	-0.433172	-0.349967	-0.41048	0.0509317	-0.418044	-0.395351	3.48504	-0.433172
OG0000024	N	Y	N		0	0		NA	NA	NA	NA		N	N		183	83	0	10	15	57	1	12	7	6	2	5	438	0	0	5	12	13			1.13687	0.251457	-0.483435	-0.394894	-0.350623	0.0212499	-0.474581	-0.377186	-0.421456	-0.43031	-0.465727	-0.439164	3.39467	-0.483435
OG0000025	N	Y	N		0	0		NA	NA	NA	NA		N	N		7	10	15	5	6	54	2	244	333	7	0	0	1	12	13	33	32	61			-0.415864	-0.38488	-0.333242	-0.436519	-0.426191	0.0695401	-0.467502	2.03181	2.95098	-0.415864	-0.488158	-0.488158	-0.47783	-0.364225
OG0000026	N	Y	N		0	0		NA	NA	NA	NA		N	N		21	18	56	20	44	51	11	112	132	43	1	1	1	1	1	93	200	4			-0.335378	-0.411601	0.553883	-0.360786	0.248993	0.426845	-0.589453	1.9767	2.48485	0.223586	-0.843528	-0.843528	-0.843528	-0.843528
OG0000029	N	Y	N		0	0		NA	NA	NA	NA		N	N		0	0	2	0	0	0	0	0	1	1	0	0	0	84	425	0	0	236			-0.321119	-0.321119	-0.30234	-0.321119	-0.321119	-0.321119	-0.321119	-0.321119	-0.311729	-0.311729	-0.321119	-0.321119	-0.321119	0.467594
OG0000033	N	Y	N		0	0		NA	NA	NA	NA		N	N		0	0	0	0	1	0	0	104	553	0	0	1	0	0	0	13	5	0			-0.317241	-0.317241	-0.317241	-0.317241	-0.31002	-0.317241	-0.317241	0.433739	3.67595	-0.317241	-0.317241	-0.31002	-0.317241	-0.317241
OG0000037	N	Y	N		0	0		NA	NA	NA	NA		N	N		74	110	364	79	6	1	0	0	0	1	0	0	0	0	0	0	0	0			0.340851	0.728345	3.46233	0.39467	-0.391082	-0.4449	-0.455664	-0.455664	-0.455664	-0.4449	-0.455664	-0.455664	-0.455664	-0.455664
OG0000040	N	Y	N		0	0		NA	NA	NA	NA		N	N		13	30	78	17	20	10	26	15	35	112	6	4	2	7	7	125	91	23			-0.422858	0.153767	1.78188	-0.287182	-0.185425	-0.524616	0.0180902	-0.35502	0.323362	2.93513	-0.660292	-0.72813	-0.795969	-0.626373
OG0000044	N	Y	N		0	0		NA	NA	NA	NA		N	N		1	1	3	2	4	5	6	11	228	20	0	0	0	0	0	229	91	0			-0.315685	-0.315685	-0.280082	-0.297883	-0.26228	-0.244478	-0.226676	-0.137667	3.72532	0.0225489	-0.333487	-0.333487	-0.333487	-0.333487
OG0000049	N	Y	N		0	0		NA	NA	NA	NA		N	N		80	41	139	30	22	26	0	20	39	0	0	0	0	6	7	14	2	135			1.433	0.371856	3.03833	0.0725572	-0.145114	-0.0362786	-0.743711	-0.199532	0.317438	-0.743711	-0.743711	-0.743711	-0.743711	-0.580457
OG0000050	N	Y	N		0	0		NA	NA	NA	NA		N	N		28	54	4	22	1	31	7	16	12	40	5	8	313	1	2	0	0	13			-0.109466	0.234822	-0.42727	-0.188917	-0.466996	-0.0697404	-0.387545	-0.268368	-0.321335	0.0494362	-0.414028	-0.374303	3.66446	-0.466996
OG0000053	N	Y	N		0	0		NA	NA	NA	NA		N	N		19	18	57	31	9	19	26	27	16	17	103	78	35	6	5	27	36	20			-0.449929	-0.487216	0.966974	-0.00248579	-0.822798	-0.449929	-0.18892	-0.151633	-0.561789	-0.524503	2.68217	1.75	0.146662	-0.934659
OG0000054	N	Y	N		0	0		NA	NA	NA	NA		N	N		113	125	1	32	5	20	17	15	12	14	3	5	151	7	10	12	0	1			1.60888	1.85746	-0.711221	-0.0690506	-0.628361	-0.317633	-0.379778	-0.421209	-0.483354	-0.441924	-0.669791	-0.628361	2.39606	-0.58693
OG0000055	N	Y	N		0	0		NA	NA	NA	NA		N	N		1	0	0	0	0	2	1	532	2	0	0	0	0	0	0	1	4	0			-0.262948	-0.27049	-0.27049	-0.27049	-0.27049	-0.255407	-0.262948	3.7416	-0.255407	-0.27049	-0.27049	-0.27049	-0.27049	-0.27049
OG0000062	N	Y	N		0	0		NA	NA	NA	NA		N	N		27	2	7	3	14	5	17	4	2	175	15	4	9	3	4	209	6	16			0.180314	-0.412825	-0.294197	-0.389099	-0.128118	-0.341648	-0.0569414	-0.365374	-0.412825	3.6917	-0.104392	-0.365374	-0.246746	-0.389099
OG0000064	N	Y	N		0	1		NA	NA	NA	NA		N	N		31	27	45	33	18	33	6	28	50	100	5	3	8	3	6	21	63	33			0.185484	0.0241935	0.75	0.266129	-0.33871	0.266129	-0.822581	0.0645161	0.951613	2.96774	-0.862903	-0.943548	-0.741935	-0.943548
OG0000066	N	Y	N		0	0		NA	NA	NA	NA		N	N		86	391	2	2	2	1	0	2	1	1	4	0	2	0	0	3	1	1			0.541521	3.65391	-0.315661	-0.315661	-0.315661	-0.325865	-0.33607	-0.315661	-0.325865	-0.325865	-0.295251	-0.33607	-0.315661	-0.33607
OG0000067	N	Y	N		0	0		NA	NA	NA	NA		N	N		46	38	44	43	28	58	2	107	88	21	0	0	2	0	0	13	1	3			0.435242	0.190035	0.37394	0.343289	-0.116473	0.803052	-0.913394	2.30494	1.72258	-0.331029	-0.974696	-0.974696	-0.913394	-0.974696
OG0000071	N	Y	N		0	0		NA	NA	NA	NA		N	N		10	115	7	7	0	1	116	0	2	15	0	7	171	0	0	0	0	0			-0.375493	1.58929	-0.43163	-0.43163	-0.562615	-0.543903	1.60801	-0.562615	-0.525191	-0.281931	-0.562615	-0.43163	2.63718	-0.562615
OG0000073	N	Y	N		0	0		NA	NA	NA	NA		N	N		0	0	0	1	6	4	0	22	26	26	0	0	335	0	0	7	11	1			-0.338962	-0.338962	-0.338962	-0.326856	-0.266327	-0.290539	-0.338962	-0.0726348	-0.0242116	-0.0242116	-0.338962	-0.338962	3.71648	-0.338962
OG0000076	N	Y	N		0	0		NA	NA	NA	NA		N	N		0	0	0	0	0	0	0	0	0	1	1	0	0	88	168	0	0	176			-0.375142	-0.375142	-0.375142	-0.375142	-0.375142	-0.375142	-0.375142	-0.375142	-0.375142	-0.353331	-0.353331	-0.375142	-0.375142	1.54419
OG0000077	N	Y	N		0	0		NA	NA	NA	NA		N	N		16	216	1	1	0	6	0	0	0	186	0	2	0	0	0	0	3	0			-0.184343	2.75731	-0.404967	-0.404967	-0.419675	-0.331426	-0.419675	-0.419675	-0.419675	2.31606	-0.419675	-0.390259	-0.419675	-0.419675
OG0000081	N	Y	N		0	0		NA	NA	NA	NA		N	N		33	14	1	2	7	19	2	13	53	5	4	9	216	1	1	0	23	12			0.145171	-0.214601	-0.460761	-0.441826	-0.347149	-0.119924	-0.441826	-0.233536	0.523879	-0.385019	-0.403955	-0.309278	3.61035	-0.460761
OG0000083	N	Y	N		0	0		NA	NA	NA	NA		N	N		2	3	1	1	395	0	1	0	3	1	0	0	0	0	1	2	1	0			-0.256348	-0.246176	-0.266521	-0.266521	3.74146	-0.276693	-0.266521	-0.276693	-0.246176	-0.266521	-0.276693	-0.276693	-0.276693	-0.276693
OG0000085	N	Y	N		0	0		NA	NA	NA	NA		N	N		15	120	8	1	0	0	35	0	0	2	0	10	211	0	0	0	0	0			-0.204861	1.61806	-0.326389	-0.447917	-0.465278	-0.465278	0.142361	-0.465278	-0.465278	-0.430556	-0.465278	-0.291667	3.19792	-0.465278
OG0000086	N	Y	N		0	0		NA	NA	NA	NA		N	N		38	29	4	0	0	14	1	41	9	46	0	1	206	0	0	1	0	9			0.237486	0.0603555	-0.431673	-0.510398	-0.510398	-0.234862	-0.490716	0.296529	-0.333267	0.394935	-0.510398	-0.490716	3.54392	-0.510398
OG0000087	N	Y	N		0	0		NA	NA	NA	NA		N	N		17	8	43	2	2	5	0	4	2	100	1	1	24	1	1	174	4	10			0.114371	-0.23654	1.12811	-0.470481	-0.470481	-0.35351	-0.548461	-0.392501	-0.470481	3.35055	-0.509471	-0.509471	0.387302	-0.509471
OG0000088	N	Y	N		0	0		NA	NA	NA	NA		N	N		3	1	0	0	384	5	0	0	0	0	0	0	0	0	0	0	0	0			-0.242586	-0.263498	-0.273955	-0.273955	3.74126	-0.221673	-0.273955	-0.273955	-0.273955	-0.273955	-0.273955	-0.273955	-0.273955	-0.273955
OG0000089	N	Y	N		0	0		NA	NA	NA	NA		N	N		58	10	4	5	12	5	5	4	23	54	2	3	139	5	8	2	6	32			0.998092	-0.350175	-0.518708	-0.490619	-0.293997	-0.490619	-0.490619	-0.518708	0.0149807	0.885737	-0.574886	-0.546797	3.27329	-0.490619
OG0000091	N	Y	N		0	0		NA	NA	NA	NA		N	N		15	293	0	11	4	20	3	3	1	17	3	3	0	0	0	0	0	0			-0.137124	3.72643	-0.345589	-0.192714	-0.289998	-0.0676353	-0.303896	-0.303896	-0.331691	-0.109328	-0.303896	-0.303896	-0.345589	-0.345589
OG0000096	N	Y	N		0	0		NA	NA	NA	NA		N	N		24	54	0	0	13	19	0	121	3	107	0	4	2	0	0	0	11	1			0.0225718	0.803904	-0.602494	-0.602494	-0.263917	-0.10765	-0.602494	2.54888	-0.524361	2.18426	-0.602494	-0.498316	-0.550405	-0.602494
OG0000098	N	Y	N		0	5		NA	NA	NA	NA		N	N		119	54	152	15	1	2	0	0	2	1	0	1	0	0	0	0	2	0			2.06305	0.66425	2.77321	-0.175029	-0.476309	-0.454789	-0.497829	-0.497829	-0.454789	-0.476309	-0.497829	-0.476309	-0.497829	-0.497829
OG0000099	N	Y	N		0	0		NA	NA	NA	NA		N	N		0	0	0	0	1	0	0	212	112	3	0	0	0	0	0	2	18	0			-0.377514	-0.377514	-0.377514	-0.377514	-0.36025	-0.377514	-0.377514	3.28253	1.55609	-0.325721	-0.377514	-0.377514	-0.377514	-0.377514
OG0000101	N	Y	N		0	0		NA	NA	NA	NA		N	N		2	2	6	2	2	2	2	103	167	16	0	0	1	2	2	13	10	12			-0.399853	-0.399853	-0.313863	-0.399853	-0.399853	-0.399853	-0.399853	1.77139	3.14723	-0.0988884	-0.442848	-0.442848	-0.42135	-0.399853
OG0000108	N	Y	N		0	0		NA	NA	NA	NA		N	N		3	1	5	10	1	0	120	0	0	4	0	3	170	2	9	0	0	3			-0.383131	-0.423745	-0.342516	-0.24098	-0.423745	-0.444052	1.99282	-0.444052	-0.444052	-0.362823	-0.444052	-0.383131	3.00818	-0.403438
OG0000115	N	Y	N		0	0		NA	NA	NA	NA		N	N		3	4	4	4	7	3	6	4	8	1	215	2	2	4	4	3	8	33			-0.286096	-0.267107	-0.267107	-0.267107	-0.210141	-0.286096	-0.22913	-0.267107	-0.191152	-0.324073	3.7395	-0.305084	-0.305084	-0.267107
OG0000120	N	Y	N		0	0		NA	NA	NA	NA		N	N		65	27	4	24	2	1	0	0	0	4	48	22	103	0	0	0	0	12			1.53069	0.238108	-0.544247	0.136062	-0.612278	-0.646293	-0.680309	-0.680309	-0.680309	-0.544247	0.952432	0.0680309	2.82328	-0.680309
OG0000125	N	Y	N		0	0		NA	NA	NA	NA		N	N		4	6	5	9	4	3	6	3	6	10	7	1	195	5	5	13	8	11			-0.294111	-0.251894	-0.273003	-0.188569	-0.294111	-0.31522	-0.251894	-0.31522	-0.251894	-0.167461	-0.230786	-0.357437	3.73761	-0.273003
OG0000127	N	Y	N		0	0		NA	NA	NA	NA		N	N		0	0	0	0	0	1	0	19	278	0	0	0	1	0	0	1	0	0			-0.28834	-0.28834	-0.28834	-0.28834	-0.28834	-0.273875	-0.28834	-0.0135009	3.733	-0.28834	-0.28834	-0.28834	-0.273875	-0.28834
OG0000135	N	Y	N		0	0		NA	NA	NA	NA		N	N		23	161	12	32	4	11	1	5	1	5	0	2	0	1	3	19	5	5			0.14215	3.64512	-0.137073	0.370605	-0.340144	-0.162457	-0.416296	-0.31476	-0.416296	-0.31476	-0.441679	-0.390912	-0.441679	-0.416296
OG0000138	N	Y	N		0	0		NA	NA	NA	NA		N	N		5	3	4	7	4	6	2	9	14	107	0	0	0	3	3	66	41	14			-0.237072	-0.314379	-0.275726	-0.159766	-0.275726	-0.198419	-0.353032	-0.08246	0.110806	3.70555	-0.430338	-0.430338	-0.430338	-0.314379
OG0000142	N	Y	N		0	0		NA	NA	NA	NA		N	N		0	1	0	0	13	26	0	29	4	1	0	0	205	0	0	0	1	1			-0.366948	-0.34722	-0.366948	-0.366948	-0.110479	0.14599	-0.366948	0.205175	-0.288035	-0.34722	-0.366948	-0.366948	3.67738	-0.366948
OG0000143	N	Y	N		0	0		NA	NA	NA	NA		N	N		22	221	5	2	2	2	1	2	3	1	2	1	3	1	1	2	3	5			0.074605	3.72536	-0.237268	-0.292305	-0.292305	-0.292305	-0.31065	-0.292305	-0.273959	-0.31065	-0.292305	-0.31065	-0.273959	-0.31065
OG0000151	N	Y	N		0	0		NA	NA	NA	NA		N	N		83	11	21	3	3	2	4	3	3	2	0	2	133	0	0	0	1	0			1.76498	-0.190075	0.0814608	-0.407304	-0.407304	-0.434458	-0.38015	-0.407304	-0.407304	-0.434458	-0.488765	-0.434458	3.12266	-0.488765
OG0000152	N	Y	N		0	0		NA	NA	NA	NA		N	N		1	1	1	0	0	4	0	1	0	0	55	106	96	0	0	1	0	0			-0.470585	-0.470585	-0.470585	-0.49882	-0.49882	-0.38588	-0.49882	-0.470585	-0.49882	-0.49882	1.05411	2.4941	2.21175	-0.49882
OG0000155	N	Y	N		0	0		NA	NA	NA	NA		N	N		13	10	16	10	14	13	7	11	26	113	0	0	0	0	0	6	26	0			-0.0936103	-0.204465	0.017244	-0.204465	-0.0566588	-0.0936103	-0.315319	-0.167513	0.386758	3.60153	-0.573979	-0.573979	-0.573979	-0.573979
OG0000160	N	Y	N		0	0		NA	NA	NA	NA		N	N		1	1	2	3	2	0	0	0	0	174	0	0	0	0	0	62	10	0			-0.258941	-0.258941	-0.235821	-0.212702	-0.235821	-0.282061	-0.282061	-0.282061	-0.282061	3.74078	-0.282061	-0.282061	-0.282061	-0.282061
OG0000162	N	Y	N		0	0		NA	NA	NA	NA		N	N		50	33	10	7	2	6	19	5	3	10	0	0	104	0	0	0	0	4			1.23587	0.606836	-0.244215	-0.355221	-0.540232	-0.392223	0.0888053	-0.429226	-0.50323	-0.244215	-0.614237	-0.614237	3.23399	-0.614237
OG0000168	N	Y	N		0	0		NA	NA	NA	NA		N	N		16	1	0	0	0	0	0	0	0	0	0	0	230	1	1	0	0	0			-0.0104951	-0.272872	-0.290364	-0.290364	-0.290364	-0.290364	-0.290364	-0.290364	-0.290364	-0.290364	-0.290364	-0.290364	3.73275	-0.272872
OG0000174	N	Y	N		0	0		NA	NA	NA	NA		N	N		1	0	0	0	6	5	0	42	101	5	0	0	79	0	0	0	1	2			-0.480556	-0.512736	-0.512736	-0.512736	-0.319656	-0.351836	-0.512736	0.838828	2.73745	-0.351836	-0.512736	-0.512736	2.02949	-0.512736
OG0000178	N	Y	N		0	0		NA	NA	NA	NA		N	N		81	18	1	2	1	8	0	1	0	0	0	0	120	0	1	1	3	0			1.90378	0.071731	-0.422631	-0.393551	-0.422631	-0.21907	-0.451712	-0.422631	-0.451712	-0.451712	-0.451712	-0.451712	3.03791	-0.451712
OG0000179	N	Y	N		0	0		NA	NA	NA	NA		N	N		89	124	0	0	0	0	2	0	0	0	0	11	11	0	0	0	0	0			2.01485	2.97823	-0.434898	-0.434898	-0.434898	-0.434898	-0.379848	-0.434898	-0.434898	-0.434898	-0.434898	-0.132121	-0.132121	-0.434898
OG0000200	N	Y	N		0	0		NA	NA	NA	NA		N	N		0	0	0	0	0	0	0	0	0	0	11	4	201	0	0	0	0	0			-0.288278	-0.288278	-0.288278	-0.288278	-0.288278	-0.288278	-0.288278	-0.288278	-0.288278	-0.288278	-0.0680657	-0.208201	3.73561	-0.288278
OG0000203	N	Y	N		0	0		NA	NA	NA	NA		N	N		0	0	0	0	0	1	211	0	0	1	0	0	0	0	0	0	0	1			-0.269972	-0.269972	-0.269972	-0.269972	-0.269972	-0.25096	3.74158	-0.269972	-0.269972	-0.25096	-0.269972	-0.269972	-0.269972	-0.269972
OG0000207	N	Y	N		0	0		NA	NA	NA	NA		N	N		0	0	0	0	210	0	0	0	0	1	0	0	0	0	0	0	0	0			-0.268622	-0.268622	-0.268622	-0.268622	3.74162	-0.268622	-0.268622	-0.268622	-0.268622	-0.249526	-0.268622	-0.268622	-0.268622	-0.268622
OG0000212	N	Y	N		0	0		NA	NA	NA	NA		N	N		0	3	0	0	0	0	0	0	0	0	2	8	191	0	0	0	0	0			-0.286571	-0.223356	-0.286571	-0.286571	-0.286571	-0.286571	-0.286571	-0.286571	-0.286571	-0.286571	-0.244428	-0.118	3.73806	-0.286571
OG0000217	N	Y	N		0	0		NA	NA	NA	NA		N	N		0	0	0	0	0	0	0	0	0	2	0	0	198	0	0	0	0	0			-0.270142	-0.270142	-0.270142	-0.270142	-0.270142	-0.270142	-0.270142	-0.270142	-0.270142	-0.229621	-0.270142	-0.270142	3.74147	-0.270142
OG0000225	N	Y	N		0	0		NA	NA	NA	NA		N	N		10	11	6	2	4	9	0	6	0	122	0	0	0	0	0	24	0	1			-0.0446912	-0.0111728	-0.178765	-0.312838	-0.245802	-0.0782096	-0.379875	-0.178765	-0.379875	3.70937	-0.379875	-0.379875	-0.379875	-0.379875
OG0000228	N	Y	N		0	0		NA	NA	NA	NA		N	N		4	6	3	2	3	8	3	4	5	3	108	11	11	2	2	7	3	7			-0.295905	-0.218712	-0.334501	-0.373097	-0.334501	-0.14152	-0.334501	-0.295905	-0.257308	-0.334501	3.71811	-0.0257308	-0.0257308	-0.373097
OG0000235	N	Y	N		0	0		NA	NA	NA	NA		N	N		7	132	7	2	1	1	1	1	4	1	4	0	1	2	2	1	4	20			-0.12556	3.73387	-0.12556	-0.279937	-0.310813	-0.310813	-0.310813	-0.310813	-0.218186	-0.310813	-0.218186	-0.341688	-0.310813	-0.279937
OG0000286	N	Y	N		0	0		NA	NA	NA	NA		N	N		4	7	0	0	0	2	0	0	1	3	8	16	129	0	0	0	0	0			-0.231029	-0.136517	-0.357045	-0.357045	-0.357045	-0.294037	-0.357045	-0.357045	-0.325541	-0.262533	-0.105013	0.147019	3.70697	-0.357045
OG0000294	N	Y	N		0	0		NA	NA	NA	NA		N	N		1	2	3	1	1	1	1	43	108	1	0	0	0	0	0	3	3	0			-0.349667	-0.313987	-0.278307	-0.349667	-0.349667	-0.349667	-0.349667	1.14891	3.46813	-0.349667	-0.385347	-0.385347	-0.385347	-0.385347
OG0000297	N	Y	N		0	0		NA	NA	NA	NA		N	N		5	104	0	1	0	0	0	34	11	0	0	0	0	0	1	9	0	1			-0.204124	3.53815	-0.393128	-0.355327	-0.393128	-0.393128	-0.393128	0.892098	0.0226805	-0.393128	-0.393128	-0.393128	-0.393128	-0.393128
OG0000300	N	Y	N		0	0		NA	NA	NA	NA		N	N		2	8	0	0	0	32	0	111	7	2	0	0	1	0	0	1	0	0			-0.317535	-0.102662	-0.38916	-0.38916	-0.38916	0.756833	-0.38916	3.586	-0.138474	-0.317535	-0.38916	-0.38916	-0.353348	-0.38916
OG0000301	N	Y	N		0	0		NA	NA	NA	NA		N	N		0	0	0	0	153	0	0	0	0	2	0	0	9	0	0	0	0	0			-0.287448	-0.287448	-0.287448	-0.287448	3.73507	-0.287448	-0.287448	-0.287448	-0.287448	-0.234866	-0.287448	-0.287448	-0.0508292	-0.287448
OG0000313	N	Y	N		0	0		NA	NA	NA	NA		N	N		5	123	1	1	0	0	0	3	0	21	0	0	3	0	0	0	0	0			-0.17912	3.68724	-0.310183	-0.310183	-0.342948	-0.342948	-0.342948	-0.244651	-0.342948	0.345133	-0.342948	-0.342948	-0.244651	-0.342948
OG0000317	N	Y	N		0	0		NA	NA	NA	NA		N	N		0	0	0	0	1	1	0	0	0	0	2	2	150	0	0	0	0	0			-0.278699	-0.278699	-0.278699	-0.278699	-0.251901	-0.251901	-0.278699	-0.278699	-0.278699	-0.278699	-0.225103	-0.225103	3.74099	-0.278699
OG0000323	N	Y	N		0	0		NA	NA	NA	NA		N	N		8	4	0	0	1	17	0	13	2	4	0	0	103	0	0	0	1	0			-0.0842059	-0.242092	-0.399978	-0.399978	-0.360506	0.271038	-0.399978	0.113152	-0.321035	-0.242092	-0.399978	-0.399978	3.66559	-0.399978
OG0000336	N	Y	N		0	0		NA	NA	NA	NA		N	N		7	4	2	1	4	6	1	4	2	109	1	1	0	1	1	2	2	3			-0.0975964	-0.210208	-0.285282	-0.322819	-0.210208	-0.135134	-0.322819	-0.210208	-0.285282	3.73119	-0.322819	-0.322819	-0.360356	-0.322819
OG0000371	N	Y	N		0	0		NA	NA	NA	NA		N	N		1	116	1	1	1	0	2	1	1	1	2	2	0	1	1	4	2	2			-0.269699	3.74091	-0.269699	-0.269699	-0.269699	-0.304574	-0.234824	-0.269699	-0.269699	-0.269699	-0.234824	-0.234824	-0.304574	-0.269699
OG0000374	N	Y	N		0	0		NA	NA	NA	NA		N	N		0	0	0	0	0	1	0	7	127	1	0	0	0	0	0	2	1	0			-0.287222	-0.287222	-0.287222	-0.287222	-0.287222	-0.255543	-0.287222	-0.0654696	3.73599	-0.255543	-0.287222	-0.287222	-0.287222	-0.287222
OG0000375	N	Y	N		0	0		NA	NA	NA	NA		N	N		0	0	0	0	0	0	0	10	129	0	0	0	0	0	0	0	0	0			-0.288711	-0.288711	-0.288711	-0.288711	-0.288711	-0.288711	-0.288711	0.0228477	3.7304	-0.288711	-0.288711	-0.288711	-0.288711	-0.288711
OG0000394	N	Y	N		0	0		NA	NA	NA	NA		N	N		6	1	12	0	2	2	2	3	1	4	102	0	0	0	1	0	0	0			-0.122563	-0.322393	0.117234	-0.362359	-0.282427	-0.282427	-0.282427	-0.242461	-0.322393	-0.202495	3.71418	-0.362359	-0.362359	-0.362359
OG0000404	N	Y	N		0	0		NA	NA	NA	NA		N	N		0	1	1	1	0	0	0	0	0	120	0	0	6	0	0	2	0	1			-0.288493	-0.254947	-0.254947	-0.254947	-0.288493	-0.288493	-0.288493	-0.288493	-0.288493	3.73699	-0.288493	-0.288493	-0.0872189	-0.288493
OG0000428	N	Y	N		0	0		NA	NA	NA	NA		N	N		3	104	2	2	1	0	3	1	1	1	3	0	0	1	1	1	1	1			-0.202939	3.73877	-0.241966	-0.241966	-0.280993	-0.32002	-0.202939	-0.280993	-0.280993	-0.280993	-0.202939	-0.32002	-0.32002	-0.280993
OG0000434	N	Y	N		0	0		NA	NA	NA	NA		N	N		9	110	0	0	0	0	0	0	0	0	0	0	3	0	0	2	0	0			0.03172	3.72832	-0.29768	-0.29768	-0.29768	-0.29768	-0.29768	-0.29768	-0.29768	-0.29768	-0.29768	-0.29768	-0.18788	-0.29768
OG0000437	N	Y	N		0	0		NA	NA	NA	NA		N	N		0	0	0	0	4	0	0	6	3	7	0	0	100	0	0	1	1	0			-0.323911	-0.323911	-0.323911	-0.323911	-0.161955	-0.323911	-0.323911	-0.0809776	-0.202444	-0.0404888	-0.323911	-0.323911	3.72497	-0.323911
OG0000441	N	Y	N		0	0		NA	NA	NA	NA		N	N		0	0	0	0	1	0	0	103	18	0	0	0	0	0	0	0	0	0			-0.315924	-0.315924	-0.315924	-0.315924	-0.277081	-0.315924	-0.315924	3.68492	0.383253	-0.315924	-0.315924	-0.315924	-0.315924	-0.315924
OG0000483	N	Y	N		0	0		NA	NA	NA	NA		N	N		2	109	2	1	0	0	0	0	0	0	0	0	0	0	0	0	0	0			-0.206572	3.74043	-0.206572	-0.24346	-0.280348	-0.280348	-0.280348	-0.280348	-0.280348	-0.280348	-0.280348	-0.280348	-0.280348	-0.280348
OG0000494	N	Y	N		0	0		NA	NA	NA	NA		N	N		0	0	1	0	0	0	0	0	0	0	0	109	1	0	0	1	0	0			-0.272501	-0.272501	-0.235677	-0.272501	-0.272501	-0.272501	-0.272501	-0.272501	-0.272501	-0.272501	-0.272501	3.74137	-0.235677	-0.272501
OG0000540	N	Y	N		0	0		NA	NA	NA	NA		N	N		0	1	0	0	0	0	0	105	1	0	0	0	0	0	0	0	0	0			-0.2727	-0.234471	-0.2727	-0.2727	-0.2727	-0.2727	-0.2727	3.74134	-0.234471	-0.2727	-0.2727	-0.2727	-0.2727	-0.2727
OG0011489	N	N	Y		2	0		NA	NA	NA	NA		NA	NA		10	0	0	0	0	0	0	0	0	0	0	0	0	0	0	0	0	0			3.74166	-0.267261	-0.267261	-0.267261	-0.267261	-0.267261	-0.267261	-0.267261	-0.267261	-0.267261	-0.267261	-0.267261	-0.267261	-0.267261
OG0011102	N	N	Y		1	0		NA	NA	NA	NA		NA	NA		11	0	0	0	0	0	0	0	0	0	0	0	0	0	0	0	0	0			3.74166	-0.267261	-0.267261	-0.267261	-0.267261	-0.267261	-0.267261	-0.267261	-0.267261	-0.267261	-0.267261	-0.267261	-0.267261	-0.267261
OG0000170	N	N	Y		0	0		NA	NA	NA	NA		NA	NA		0	0	0	0	0	0	0	232	0	0	0	0	0	0	0	3	11	0			-0.267261	-0.267261	-0.267261	-0.267261	-0.267261	-0.267261	-0.267261	3.74166	-0.267261	-0.267261	-0.267261	-0.267261	-0.267261	-0.267261
OG0000177	N	N	Y		0	0		NA	NA	NA	NA		NA	NA		0	0	0	0	0	0	0	0	0	0	0	0	1	0	0	0	0	238			-0.267261	-0.267261	-0.267261	-0.267261	-0.267261	-0.267261	-0.267261	-0.267261	-0.267261	-0.267261	-0.267261	-0.267261	3.74166	-0.267261
OG0000321	N	N	Y		0	0		NA	NA	NA	NA		NA	NA		0	0	0	0	0	0	0	0	0	0	0	0	0	0	0	0	0	155			#NUM!	#NUM!	#NUM!	#NUM!	#NUM!	#NUM!	#NUM!	#NUM!	#NUM!	#NUM!	#NUM!	#NUM!	#NUM!	#NUM!
OG0000330	N	N	Y		0	0		NA	NA	NA	NA		NA	NA		0	0	0	0	0	0	0	0	0	153	0	0	0	0	0	0	0	0			-0.267261	-0.267261	-0.267261	-0.267261	-0.267261	-0.267261	-0.267261	-0.267261	-0.267261	3.74166	-0.267261	-0.267261	-0.267261	-0.267261
OG0000386	N	N	Y		0	0		NA	NA	NA	NA		NA	NA		0	137	0	0	0	0	0	0	0	0	0	0	0	0	0	0	0	0			-0.267261	3.74166	-0.267261	-0.267261	-0.267261	-0.267261	-0.267261	-0.267261	-0.267261	-0.267261	-0.267261	-0.267261	-0.267261	-0.267261
OG0000413	N	N	Y		0	0		NA	NA	NA	NA		NA	NA		129	0	0	0	0	0	0	0	0	0	0	0	0	0	0	0	1	0			3.74166	-0.267261	-0.267261	-0.267261	-0.267261	-0.267261	-0.267261	-0.267261	-0.267261	-0.267261	-0.267261	-0.267261	-0.267261	-0.267261
OG0000596	N	N	Y		0	0		NA	NA	NA	NA		NA	NA		0	0	0	0	101	0	0	0	0	0	0	0	0	0	0	0	0	0			-0.267261	-0.267261	-0.267261	-0.267261	3.74166	-0.267261	-0.267261	-0.267261	-0.267261	-0.267261	-0.267261	-0.267261	-0.267261	-0.267261
OG0000631	N	N	Y		0	0		NA	NA	NA	NA		NA	NA		0	0	0	0	0	0	0	0	0	0	97	0	0	0	0	0	0	0			-0.267261	-0.267261	-0.267261	-0.267261	-0.267261	-0.267261	-0.267261	-0.267261	-0.267261	-0.267261	3.74166	-0.267261	-0.267261	-0.267261
OG0000689	N	N	Y		0	0		NA	NA	NA	NA		NA	NA		0	0	0	0	0	0	0	0	0	0	0	0	0	0	0	0	0	91			#NUM!	#NUM!	#NUM!	#NUM!	#NUM!	#NUM!	#NUM!	#NUM!	#NUM!	#NUM!	#NUM!	#NUM!	#NUM!	#NUM!
OG0001034	N	N	Y		0	0		NA	NA	NA	NA		NA	NA		0	70	0	0	0	0	0	0	0	0	0	0	0	0	0	0	0	0			-0.267261	3.74166	-0.267261	-0.267261	-0.267261	-0.267261	-0.267261	-0.267261	-0.267261	-0.267261	-0.267261	-0.267261	-0.267261	-0.267261
OG0001148	N	N	Y		0	0		NA	NA	NA	NA		NA	NA		0	0	0	0	0	0	0	0	0	0	0	0	1	0	0	61	3	0			-0.267261	-0.267261	-0.267261	-0.267261	-0.267261	-0.267261	-0.267261	-0.267261	-0.267261	-0.267261	-0.267261	-0.267261	3.74166	-0.267261
OG0001168	N	N	Y		0	0		NA	NA	NA	NA		NA	NA		0	0	0	0	0	0	0	0	0	1	0	0	0	0	0	0	0	64			-0.267261	-0.267261	-0.267261	-0.267261	-0.267261	-0.267261	-0.267261	-0.267261	-0.267261	3.74166	-0.267261	-0.267261	-0.267261	-0.267261
OG0001265	N	N	Y		0	0		NA	NA	NA	NA		NA	NA		0	0	0	0	0	0	0	0	0	0	0	0	61	0	0	0	0	0			-0.267261	-0.267261	-0.267261	-0.267261	-0.267261	-0.267261	-0.267261	-0.267261	-0.267261	-0.267261	-0.267261	-0.267261	3.74166	-0.267261
OG0001501	N	N	Y		0	0		NA	NA	NA	NA		NA	NA		0	0	0	0	0	0	0	0	0	0	0	0	55	0	0	0	0	0			-0.267261	-0.267261	-0.267261	-0.267261	-0.267261	-0.267261	-0.267261	-0.267261	-0.267261	-0.267261	-0.267261	-0.267261	3.74166	-0.267261
OG0001586	N	N	Y		0	0		NA	NA	NA	NA		NA	NA		54	0	0	0	0	0	0	0	0	0	0	0	0	0	0	0	0	0			3.74166	-0.267261	-0.267261	-0.267261	-0.267261	-0.267261	-0.267261	-0.267261	-0.267261	-0.267261	-0.267261	-0.267261	-0.267261	-0.267261
OG0001636	N	N	Y		0	0		NA	NA	NA	NA		NA	NA		0	0	0	0	0	0	0	0	0	0	0	0	52	0	0	0	0	0			-0.267261	-0.267261	-0.267261	-0.267261	-0.267261	-0.267261	-0.267261	-0.267261	-0.267261	-0.267261	-0.267261	-0.267261	3.74166	-0.267261
OG0001677	N	N	Y		0	0		NA	NA	NA	NA		NA	NA		0	0	0	0	0	0	0	0	0	0	0	0	0	0	0	52	0	0			#NUM!	#NUM!	#NUM!	#NUM!	#NUM!	#NUM!	#NUM!	#NUM!	#NUM!	#NUM!	#NUM!	#NUM!	#NUM!	#NUM!
OG0001681	N	N	Y		0	0		NA	NA	NA	NA		NA	NA		0	0	0	0	46	0	0	0	0	0	0	0	0	0	0	0	0	6			-0.267261	-0.267261	-0.267261	-0.267261	3.74166	-0.267261	-0.267261	-0.267261	-0.267261	-0.267261	-0.267261	-0.267261	-0.267261	-0.267261
OG0001729	N	N	Y		0	0		NA	NA	NA	NA		NA	NA		0	0	0	0	0	51	0	0	0	0	0	0	0	0	0	0	0	0			-0.267261	-0.267261	-0.267261	-0.267261	-0.267261	3.74166	-0.267261	-0.267261	-0.267261	-0.267261	-0.267261	-0.267261	-0.267261	-0.267261
OG0001800	N	N	Y		0	0		NA	NA	NA	NA		NA	NA		0	0	0	0	0	0	0	0	0	0	0	0	49	0	0	0	0	0			-0.267261	-0.267261	-0.267261	-0.267261	-0.267261	-0.267261	-0.267261	-0.267261	-0.267261	-0.267261	-0.267261	-0.267261	3.74166	-0.267261
OG0001931	N	N	Y		0	0		NA	NA	NA	NA		NA	NA		0	48	0	0	0	0	0	0	0	0	0	0	0	0	0	0	0	0			-0.267261	3.74166	-0.267261	-0.267261	-0.267261	-0.267261	-0.267261	-0.267261	-0.267261	-0.267261	-0.267261	-0.267261	-0.267261	-0.267261
OG0002064	N	N	Y		0	0		NA	NA	NA	NA		NA	NA		0	0	0	0	0	0	0	0	0	0	46	0	0	0	0	0	0	0			-0.267261	-0.267261	-0.267261	-0.267261	-0.267261	-0.267261	-0.267261	-0.267261	-0.267261	-0.267261	3.74166	-0.267261	-0.267261	-0.267261
OG0002139	N	N	Y		0	0		NA	NA	NA	NA		NA	NA		0	0	0	0	0	0	0	0	0	44	0	0	0	0	0	1	0	0			-0.267261	-0.267261	-0.267261	-0.267261	-0.267261	-0.267261	-0.267261	-0.267261	-0.267261	3.74166	-0.267261	-0.267261	-0.267261	-0.267261
OG0002294	N	N	Y		0	0		NA	NA	NA	NA		NA	NA		0	0	0	0	0	0	0	0	0	0	0	0	0	0	0	9	34	0			#NUM!	#NUM!	#NUM!	#NUM!	#NUM!	#NUM!	#NUM!	#NUM!	#NUM!	#NUM!	#NUM!	#NUM!	#NUM!	#NUM!
OG0002383	N	N	Y		0	0		NA	NA	NA	NA		NA	NA		0	0	0	0	0	0	0	0	0	0	0	0	0	0	0	0	0	42			#NUM!	#NUM!	#NUM!	#NUM!	#NUM!	#NUM!	#NUM!	#NUM!	#NUM!	#NUM!	#NUM!	#NUM!	#NUM!	#NUM!
OG0002786	N	N	Y		0	0		NA	NA	NA	NA		NA	NA		0	0	0	0	0	0	0	9	0	0	0	0	0	0	0	0	9	20			-0.267261	-0.267261	-0.267261	-0.267261	-0.267261	-0.267261	-0.267261	3.74166	-0.267261	-0.267261	-0.267261	-0.267261	-0.267261	-0.267261
OG0002799	N	N	Y		0	0		NA	NA	NA	NA		NA	NA		0	0	0	0	0	0	0	0	0	0	0	0	37	0	0	0	0	0			-0.267261	-0.267261	-0.267261	-0.267261	-0.267261	-0.267261	-0.267261	-0.267261	-0.267261	-0.267261	-0.267261	-0.267261	3.74166	-0.267261
OG0003074	N	N	Y		0	0		NA	NA	NA	NA		NA	NA		0	0	36	0	0	0	0	0	0	0	0	0	0	0	0	0	0	0			-0.267261	-0.267261	3.74166	-0.267261	-0.267261	-0.267261	-0.267261	-0.267261	-0.267261	-0.267261	-0.267261	-0.267261	-0.267261	-0.267261
OG0003080	N	N	Y		0	0		NA	NA	NA	NA		NA	NA		0	0	0	0	0	0	0	0	0	0	0	0	0	0	0	0	36	0			#NUM!	#NUM!	#NUM!	#NUM!	#NUM!	#NUM!	#NUM!	#NUM!	#NUM!	#NUM!	#NUM!	#NUM!	#NUM!	#NUM!
OG0003221	N	N	Y		0	0		NA	NA	NA	NA		NA	NA		0	0	0	0	0	0	0	0	0	32	0	0	0	0	0	3	0	0			-0.267261	-0.267261	-0.267261	-0.267261	-0.267261	-0.267261	-0.267261	-0.267261	-0.267261	3.74166	-0.267261	-0.267261	-0.267261	-0.267261
OG0003222	N	N	Y		0	0		NA	NA	NA	NA		NA	NA		0	0	0	0	0	0	0	0	0	0	0	35	0	0	0	0	0	0			-0.267261	-0.267261	-0.267261	-0.267261	-0.267261	-0.267261	-0.267261	-0.267261	-0.267261	-0.267261	-0.267261	3.74166	-0.267261	-0.267261
OG0003223	N	N	Y		0	0		NA	NA	NA	NA		NA	NA		0	0	0	0	0	0	0	0	0	29	0	0	0	0	0	0	6	0			-0.267261	-0.267261	-0.267261	-0.267261	-0.267261	-0.267261	-0.267261	-0.267261	-0.267261	3.74166	-0.267261	-0.267261	-0.267261	-0.267261
OG0003227	N	N	Y		0	0		NA	NA	NA	NA		NA	NA		0	0	0	0	35	0	0	0	0	0	0	0	0	0	0	0	0	0			-0.267261	-0.267261	-0.267261	-0.267261	3.74166	-0.267261	-0.267261	-0.267261	-0.267261	-0.267261	-0.267261	-0.267261	-0.267261	-0.267261
OG0003229	N	N	Y		0	0		NA	NA	NA	NA		NA	NA		0	0	0	0	0	0	0	0	0	0	0	0	0	0	0	0	0	35			#NUM!	#NUM!	#NUM!	#NUM!	#NUM!	#NUM!	#NUM!	#NUM!	#NUM!	#NUM!	#NUM!	#NUM!	#NUM!	#NUM!
OG0003243	N	N	Y		0	0		NA	NA	NA	NA		NA	NA		0	0	0	0	0	0	0	0	0	0	0	0	34	0	0	0	0	0			-0.267261	-0.267261	-0.267261	-0.267261	-0.267261	-0.267261	-0.267261	-0.267261	-0.267261	-0.267261	-0.267261	-0.267261	3.74166	-0.267261
OG0003246	N	N	Y		0	0		NA	NA	NA	NA		NA	NA		0	0	0	0	0	0	0	0	0	0	0	0	34	0	0	0	0	0			-0.267261	-0.267261	-0.267261	-0.267261	-0.267261	-0.267261	-0.267261	-0.267261	-0.267261	-0.267261	-0.267261	-0.267261	3.74166	-0.267261
OG0003419	N	N	Y		0	0		NA	NA	NA	NA		NA	NA		0	0	0	0	0	0	0	0	0	0	0	34	0	0	0	0	0	0			-0.267261	-0.267261	-0.267261	-0.267261	-0.267261	-0.267261	-0.267261	-0.267261	-0.267261	-0.267261	-0.267261	3.74166	-0.267261	-0.267261
OG0003599	N	N	Y		0	0		NA	NA	NA	NA		NA	NA		0	0	0	0	0	0	0	0	0	30	0	0	0	0	0	1	2	0			-0.267261	-0.267261	-0.267261	-0.267261	-0.267261	-0.267261	-0.267261	-0.267261	-0.267261	3.74166	-0.267261	-0.267261	-0.267261	-0.267261
OG0003605	N	N	Y		0	0		NA	NA	NA	NA		NA	NA		0	33	0	0	0	0	0	0	0	0	0	0	0	0	0	0	0	0			-0.267261	3.74166	-0.267261	-0.267261	-0.267261	-0.267261	-0.267261	-0.267261	-0.267261	-0.267261	-0.267261	-0.267261	-0.267261	-0.267261
OG0003819	N	N	Y		0	0		NA	NA	NA	NA		NA	NA		0	0	0	0	1	0	0	0	0	0	0	0	0	0	0	30	1	0			-0.267261	-0.267261	-0.267261	-0.267261	3.74166	-0.267261	-0.267261	-0.267261	-0.267261	-0.267261	-0.267261	-0.267261	-0.267261	-0.267261
OG0003852	N	N	Y		0	0		NA	NA	NA	NA		NA	NA		0	0	0	0	0	0	0	0	0	0	0	0	31	0	0	0	0	0			-0.267261	-0.267261	-0.267261	-0.267261	-0.267261	-0.267261	-0.267261	-0.267261	-0.267261	-0.267261	-0.267261	-0.267261	3.74166	-0.267261
OG0003857	N	N	Y		0	0		NA	NA	NA	NA		NA	NA		0	0	0	0	0	0	0	0	0	0	0	0	31	0	0	0	0	0			-0.267261	-0.267261	-0.267261	-0.267261	-0.267261	-0.267261	-0.267261	-0.267261	-0.267261	-0.267261	-0.267261	-0.267261	3.74166	-0.267261
OG0003858	N	N	Y		0	0		NA	NA	NA	NA		NA	NA		0	0	0	0	0	0	0	0	0	0	0	0	31	0	0	0	0	0			-0.267261	-0.267261	-0.267261	-0.267261	-0.267261	-0.267261	-0.267261	-0.267261	-0.267261	-0.267261	-0.267261	-0.267261	3.74166	-0.267261
OG0004035	N	N	Y		0	0		NA	NA	NA	NA		NA	NA		0	0	0	0	0	0	0	0	0	0	0	0	0	0	0	31	0	0			#NUM!	#NUM!	#NUM!	#NUM!	#NUM!	#NUM!	#NUM!	#NUM!	#NUM!	#NUM!	#NUM!	#NUM!	#NUM!	#NUM!
OG0004036	N	N	Y		0	0		NA	NA	NA	NA		NA	NA		0	0	0	0	0	0	0	0	0	0	0	0	0	0	0	31	0	0			#NUM!	#NUM!	#NUM!	#NUM!	#NUM!	#NUM!	#NUM!	#NUM!	#NUM!	#NUM!	#NUM!	#NUM!	#NUM!	#NUM!
OG0004037	N	N	Y		0	0		NA	NA	NA	NA		NA	NA		0	0	0	0	0	0	0	0	0	0	0	0	0	0	0	31	0	0			#NUM!	#NUM!	#NUM!	#NUM!	#NUM!	#NUM!	#NUM!	#NUM!	#NUM!	#NUM!	#NUM!	#NUM!	#NUM!	#NUM!
OG0004038	N	N	Y		0	0		NA	NA	NA	NA		NA	NA		0	0	0	0	0	0	0	0	0	0	0	0	0	0	0	25	6	0			#NUM!	#NUM!	#NUM!	#NUM!	#NUM!	#NUM!	#NUM!	#NUM!	#NUM!	#NUM!	#NUM!	#NUM!	#NUM!	#NUM!
OG0004053	N	N	Y		0	0		NA	NA	NA	NA		NA	NA		0	0	0	0	0	0	0	0	0	0	31	0	0	0	0	0	0	0			-0.267261	-0.267261	-0.267261	-0.267261	-0.267261	-0.267261	-0.267261	-0.267261	-0.267261	-0.267261	3.74166	-0.267261	-0.267261	-0.267261
OG0004105	N	N	Y		0	0		NA	NA	NA	NA		NA	NA		0	0	0	0	0	0	0	0	0	0	0	0	30	0	0	0	0	0			-0.267261	-0.267261	-0.267261	-0.267261	-0.267261	-0.267261	-0.267261	-0.267261	-0.267261	-0.267261	-0.267261	-0.267261	3.74166	-0.267261
OG0004304	N	N	Y		0	0		NA	NA	NA	NA		NA	NA		0	0	0	0	0	0	0	0	0	0	0	0	0	0	0	5	23	2			#NUM!	#NUM!	#NUM!	#NUM!	#NUM!	#NUM!	#NUM!	#NUM!	#NUM!	#NUM!	#NUM!	#NUM!	#NUM!	#NUM!
OG0004589	N	N	Y		0	0		NA	NA	NA	NA		NA	NA		0	0	0	0	0	0	0	0	0	29	0	0	0	0	0	0	0	0			-0.267261	-0.267261	-0.267261	-0.267261	-0.267261	-0.267261	-0.267261	-0.267261	-0.267261	3.74166	-0.267261	-0.267261	-0.267261	-0.267261
OG0004596	N	N	Y		0	0		NA	NA	NA	NA		NA	NA		0	0	0	0	0	0	0	0	0	0	0	0	0	0	0	0	0	29			#NUM!	#NUM!	#NUM!	#NUM!	#NUM!	#NUM!	#NUM!	#NUM!	#NUM!	#NUM!	#NUM!	#NUM!	#NUM!	#NUM!
OG0004878	N	N	Y		0	0		NA	NA	NA	NA		NA	NA		0	0	0	0	0	0	0	0	0	0	28	0	0	0	0	0	0	0			-0.267261	-0.267261	-0.267261	-0.267261	-0.267261	-0.267261	-0.267261	-0.267261	-0.267261	-0.267261	3.74166	-0.267261	-0.267261	-0.267261
OG0004880	N	N	Y		0	0		NA	NA	NA	NA		NA	NA		28	0	0	0	0	0	0	0	0	0	0	0	0	0	0	0	0	0			3.74166	-0.267261	-0.267261	-0.267261	-0.267261	-0.267261	-0.267261	-0.267261	-0.267261	-0.267261	-0.267261	-0.267261	-0.267261	-0.267261
OG0005207	N	N	Y		0	0		NA	NA	NA	NA		NA	NA		0	0	0	0	0	0	0	0	0	0	0	0	0	0	0	27	0	0			#NUM!	#NUM!	#NUM!	#NUM!	#NUM!	#NUM!	#NUM!	#NUM!	#NUM!	#NUM!	#NUM!	#NUM!	#NUM!	#NUM!
OG0005216	N	N	Y		0	0		NA	NA	NA	NA		NA	NA		0	0	0	0	0	0	0	0	0	0	0	0	0	0	0	1	26	0			#NUM!	#NUM!	#NUM!	#NUM!	#NUM!	#NUM!	#NUM!	#NUM!	#NUM!	#NUM!	#NUM!	#NUM!	#NUM!	#NUM!
OG0005219	N	N	Y		0	0		NA	NA	NA	NA		NA	NA		0	0	27	0	0	0	0	0	0	0	0	0	0	0	0	0	0	0			-0.267261	-0.267261	3.74166	-0.267261	-0.267261	-0.267261	-0.267261	-0.267261	-0.267261	-0.267261	-0.267261	-0.267261	-0.267261	-0.267261
OG0005223	N	N	Y		0	0		NA	NA	NA	NA		NA	NA		0	0	0	0	0	0	0	0	0	9	0	0	0	0	0	0	18	0			-0.267261	-0.267261	-0.267261	-0.267261	-0.267261	-0.267261	-0.267261	-0.267261	-0.267261	3.74166	-0.267261	-0.267261	-0.267261	-0.267261
OG0005225	N	N	Y		0	0		NA	NA	NA	NA		NA	NA		0	0	0	0	0	0	0	0	0	27	0	0	0	0	0	0	0	0			-0.267261	-0.267261	-0.267261	-0.267261	-0.267261	-0.267261	-0.267261	-0.267261	-0.267261	3.74166	-0.267261	-0.267261	-0.267261	-0.267261
OG0005234	N	N	Y		0	0		NA	NA	NA	NA		NA	NA		27	0	0	0	0	0	0	0	0	0	0	0	0	0	0	0	0	0			3.74166	-0.267261	-0.267261	-0.267261	-0.267261	-0.267261	-0.267261	-0.267261	-0.267261	-0.267261	-0.267261	-0.267261	-0.267261	-0.267261
OG0005245	N	N	Y		0	0		NA	NA	NA	NA		NA	NA		0	0	0	0	0	0	0	0	0	0	0	0	26	0	0	0	0	0			-0.267261	-0.267261	-0.267261	-0.267261	-0.267261	-0.267261	-0.267261	-0.267261	-0.267261	-0.267261	-0.267261	-0.267261	3.74166	-0.267261
OG0005284	N	N	Y		0	0		NA	NA	NA	NA		NA	NA		0	0	0	0	0	0	0	0	0	0	0	0	26	0	0	0	0	0			-0.267261	-0.267261	-0.267261	-0.267261	-0.267261	-0.267261	-0.267261	-0.267261	-0.267261	-0.267261	-0.267261	-0.267261	3.74166	-0.267261
OG0005291	N	N	Y		0	0		NA	NA	NA	NA		NA	NA		0	0	0	0	0	0	0	0	0	0	0	0	26	0	0	0	0	0			-0.267261	-0.267261	-0.267261	-0.267261	-0.267261	-0.267261	-0.267261	-0.267261	-0.267261	-0.267261	-0.267261	-0.267261	3.74166	-0.267261
OG0005602	N	N	Y		0	0		NA	NA	NA	NA		NA	NA		0	0	0	0	0	0	0	0	0	26	0	0	0	0	0	0	0	0			-0.267261	-0.267261	-0.267261	-0.267261	-0.267261	-0.267261	-0.267261	-0.267261	-0.267261	3.74166	-0.267261	-0.267261	-0.267261	-0.267261
OG0006006	N	N	Y		0	0		NA	NA	NA	NA		NA	NA		0	0	0	0	0	0	0	0	0	0	25	0	0	0	0	0	0	0			-0.267261	-0.267261	-0.267261	-0.267261	-0.267261	-0.267261	-0.267261	-0.267261	-0.267261	-0.267261	3.74166	-0.267261	-0.267261	-0.267261
OG0006328	N	N	Y		0	0		NA	NA	NA	NA		NA	NA		0	0	0	24	0	0	0	0	0	0	0	0	0	0	0	0	0	0			-0.267261	-0.267261	-0.267261	3.74166	-0.267261	-0.267261	-0.267261	-0.267261	-0.267261	-0.267261	-0.267261	-0.267261	-0.267261	-0.267261
OG0006421	N	N	Y		0	0		NA	NA	NA	NA		NA	NA		0	0	1	0	0	0	0	0	0	0	0	0	0	0	0	12	11	0			-0.267261	-0.267261	3.74166	-0.267261	-0.267261	-0.267261	-0.267261	-0.267261	-0.267261	-0.267261	-0.267261	-0.267261	-0.267261	-0.267261
OG0006431	N	N	Y		0	0		NA	NA	NA	NA		NA	NA		0	0	0	0	0	0	0	0	0	24	0	0	0	0	0	0	0	0			-0.267261	-0.267261	-0.267261	-0.267261	-0.267261	-0.267261	-0.267261	-0.267261	-0.267261	3.74166	-0.267261	-0.267261	-0.267261	-0.267261
OG0006432	N	N	Y		0	0		NA	NA	NA	NA		NA	NA		0	0	0	0	0	0	0	0	0	24	0	0	0	0	0	0	0	0			-0.267261	-0.267261	-0.267261	-0.267261	-0.267261	-0.267261	-0.267261	-0.267261	-0.267261	3.74166	-0.267261	-0.267261	-0.267261	-0.267261
OG0006436	N	N	Y		0	0		NA	NA	NA	NA		NA	NA		0	0	0	0	0	0	0	0	24	0	0	0	0	0	0	0	0	0			-0.267261	-0.267261	-0.267261	-0.267261	-0.267261	-0.267261	-0.267261	-0.267261	3.74166	-0.267261	-0.267261	-0.267261	-0.267261	-0.267261
OG0006439	N	N	Y		0	0		NA	NA	NA	NA		NA	NA		0	0	0	0	0	0	0	0	0	0	24	0	0	0	0	0	0	0			-0.267261	-0.267261	-0.267261	-0.267261	-0.267261	-0.267261	-0.267261	-0.267261	-0.267261	-0.267261	3.74166	-0.267261	-0.267261	-0.267261
OG0006441	N	N	Y		0	0		NA	NA	NA	NA		NA	NA		0	0	0	0	0	0	0	0	0	0	0	0	0	0	0	0	0	24			#NUM!	#NUM!	#NUM!	#NUM!	#NUM!	#NUM!	#NUM!	#NUM!	#NUM!	#NUM!	#NUM!	#NUM!	#NUM!	#NUM!
OG0006442	N	N	Y		0	0		NA	NA	NA	NA		NA	NA		0	0	0	0	0	0	0	0	0	0	0	0	0	0	0	0	0	24			#NUM!	#NUM!	#NUM!	#NUM!	#NUM!	#NUM!	#NUM!	#NUM!	#NUM!	#NUM!	#NUM!	#NUM!	#NUM!	#NUM!
OG0006510	N	N	Y		0	0		NA	NA	NA	NA		NA	NA		0	0	0	0	0	0	0	0	0	0	0	0	23	0	0	0	0	0			-0.267261	-0.267261	-0.267261	-0.267261	-0.267261	-0.267261	-0.267261	-0.267261	-0.267261	-0.267261	-0.267261	-0.267261	3.74166	-0.267261
OG0006570	N	N	Y		0	0		NA	NA	NA	NA		NA	NA		1	1	1	1	1	1	1	1	1	1	1	1	1	1	1	1	1	6			#NUM!	#NUM!	#NUM!	#NUM!	#NUM!	#NUM!	#NUM!	#NUM!	#NUM!	#NUM!	#NUM!	#NUM!	#NUM!	#NUM!
OG0006656	N	N	Y		0	0		NA	NA	NA	NA		NA	NA		1	1	1	1	1	1	1	1	1	1	1	1	1	1	1	2	3	3			#NUM!	#NUM!	#NUM!	#NUM!	#NUM!	#NUM!	#NUM!	#NUM!	#NUM!	#NUM!	#NUM!	#NUM!	#NUM!	#NUM!
OG0006848	N	N	Y		0	0		NA	NA	NA	NA		NA	NA		0	0	0	0	0	0	0	0	0	0	0	3	0	0	0	20	0	0			-0.267261	-0.267261	-0.267261	-0.267261	-0.267261	-0.267261	-0.267261	-0.267261	-0.267261	-0.267261	-0.267261	3.74166	-0.267261	-0.267261
OG0006868	N	N	Y		0	0		NA	NA	NA	NA		NA	NA		0	0	0	0	0	0	0	0	23	0	0	0	0	0	0	0	0	0			-0.267261	-0.267261	-0.267261	-0.267261	-0.267261	-0.267261	-0.267261	-0.267261	3.74166	-0.267261	-0.267261	-0.267261	-0.267261	-0.267261
OG0006870	N	N	Y		0	0		NA	NA	NA	NA		NA	NA		0	0	0	0	0	0	0	0	0	0	23	0	0	0	0	0	0	0			-0.267261	-0.267261	-0.267261	-0.267261	-0.267261	-0.267261	-0.267261	-0.267261	-0.267261	-0.267261	3.74166	-0.267261	-0.267261	-0.267261
OG0006873	N	N	Y		0	0		NA	NA	NA	NA		NA	NA		0	0	0	0	0	1	0	0	0	0	0	0	0	0	0	0	22	0			-0.267261	-0.267261	-0.267261	-0.267261	-0.267261	3.74166	-0.267261	-0.267261	-0.267261	-0.267261	-0.267261	-0.267261	-0.267261	-0.267261
OG0006931	N	N	Y		0	0		NA	NA	NA	NA		NA	NA		0	0	0	0	0	0	0	0	0	0	0	0	22	0	0	0	0	0			-0.267261	-0.267261	-0.267261	-0.267261	-0.267261	-0.267261	-0.267261	-0.267261	-0.267261	-0.267261	-0.267261	-0.267261	3.74166	-0.267261
OG0007002	N	N	Y		0	0		NA	NA	NA	NA		NA	NA		1	1	1	1	1	1	1	1	1	1	1	1	1	1	1	1	1	5			#NUM!	#NUM!	#NUM!	#NUM!	#NUM!	#NUM!	#NUM!	#NUM!	#NUM!	#NUM!	#NUM!	#NUM!	#NUM!	#NUM!
OG0007017	N	N	Y		0	0		NA	NA	NA	NA		NA	NA		1	1	1	1	1	1	1	1	1	1	1	1	1	1	1	1	2	4			#NUM!	#NUM!	#NUM!	#NUM!	#NUM!	#NUM!	#NUM!	#NUM!	#NUM!	#NUM!	#NUM!	#NUM!	#NUM!	#NUM!
OG0007358	N	N	Y		0	0		NA	NA	NA	NA		NA	NA		0	0	0	0	0	0	0	0	0	0	22	0	0	0	0	0	0	0			-0.267261	-0.267261	-0.267261	-0.267261	-0.267261	-0.267261	-0.267261	-0.267261	-0.267261	-0.267261	3.74166	-0.267261	-0.267261	-0.267261
OG0007365	N	N	Y		0	0		NA	NA	NA	NA		NA	NA		0	0	0	0	0	0	1	0	0	0	0	0	0	0	0	0	0	21			-0.267261	-0.267261	-0.267261	-0.267261	-0.267261	-0.267261	3.74166	-0.267261	-0.267261	-0.267261	-0.267261	-0.267261	-0.267261	-0.267261
OG0007366	N	N	Y		0	0		NA	NA	NA	NA		NA	NA		22	0	0	0	0	0	0	0	0	0	0	0	0	0	0	0	0	0			3.74166	-0.267261	-0.267261	-0.267261	-0.267261	-0.267261	-0.267261	-0.267261	-0.267261	-0.267261	-0.267261	-0.267261	-0.267261	-0.267261
OG0007367	N	N	Y		0	0		NA	NA	NA	NA		NA	NA		0	0	0	0	0	0	0	0	0	0	0	0	0	0	0	0	0	22			#NUM!	#NUM!	#NUM!	#NUM!	#NUM!	#NUM!	#NUM!	#NUM!	#NUM!	#NUM!	#NUM!	#NUM!	#NUM!	#NUM!
OG0007410	N	N	Y		0	0		NA	NA	NA	NA		NA	NA		1	1	1	1	1	1	1	1	1	1	1	1	1	1	1	1	2	3			#NUM!	#NUM!	#NUM!	#NUM!	#NUM!	#NUM!	#NUM!	#NUM!	#NUM!	#NUM!	#NUM!	#NUM!	#NUM!	#NUM!
OG0007441	N	N	Y		0	0		NA	NA	NA	NA		NA	NA		0	0	0	0	0	0	0	0	0	0	0	0	21	0	0	0	0	0			-0.267261	-0.267261	-0.267261	-0.267261	-0.267261	-0.267261	-0.267261	-0.267261	-0.267261	-0.267261	-0.267261	-0.267261	3.74166	-0.267261
OG0007584	N	N	Y		0	0		NA	NA	NA	NA		NA	NA		1	1	1	1	1	1	1	1	1	1	1	1	1	1	1	1	2	3			#NUM!	#NUM!	#NUM!	#NUM!	#NUM!	#NUM!	#NUM!	#NUM!	#NUM!	#NUM!	#NUM!	#NUM!	#NUM!	#NUM!
OG0007603	N	N	Y		0	0		NA	NA	NA	NA		NA	NA		1	1	1	1	1	1	1	1	1	1	1	1	1	1	1	1	2	3			#NUM!	#NUM!	#NUM!	#NUM!	#NUM!	#NUM!	#NUM!	#NUM!	#NUM!	#NUM!	#NUM!	#NUM!	#NUM!	#NUM!
OG0007637	N	N	Y		0	0		NA	NA	NA	NA		NA	NA		1	1	1	1	1	1	1	1	1	1	1	1	1	1	1	1	2	3			#NUM!	#NUM!	#NUM!	#NUM!	#NUM!	#NUM!	#NUM!	#NUM!	#NUM!	#NUM!	#NUM!	#NUM!	#NUM!	#NUM!
OG0007684	N	N	Y		0	0		NA	NA	NA	NA		NA	NA		0	0	0	21	0	0	0	0	0	0	0	0	0	0	0	0	0	0			-0.267261	-0.267261	-0.267261	3.74166	-0.267261	-0.267261	-0.267261	-0.267261	-0.267261	-0.267261	-0.267261	-0.267261	-0.267261	-0.267261
OG0007766	N	N	Y		0	0		NA	NA	NA	NA		NA	NA		0	0	0	0	0	0	0	0	0	0	0	0	0	0	0	21	0	0			#NUM!	#NUM!	#NUM!	#NUM!	#NUM!	#NUM!	#NUM!	#NUM!	#NUM!	#NUM!	#NUM!	#NUM!	#NUM!	#NUM!
OG0007794	N	N	Y		0	0		NA	NA	NA	NA		NA	NA		0	0	0	0	0	0	0	0	0	20	0	0	0	0	0	0	1	0			-0.267261	-0.267261	-0.267261	-0.267261	-0.267261	-0.267261	-0.267261	-0.267261	-0.267261	3.74166	-0.267261	-0.267261	-0.267261	-0.267261
OG0007796	N	N	Y		0	0		NA	NA	NA	NA		NA	NA		0	0	0	0	0	0	0	0	0	21	0	0	0	0	0	0	0	0			-0.267261	-0.267261	-0.267261	-0.267261	-0.267261	-0.267261	-0.267261	-0.267261	-0.267261	3.74166	-0.267261	-0.267261	-0.267261	-0.267261
OG0007797	N	N	Y		0	0		NA	NA	NA	NA		NA	NA		0	0	0	0	0	0	0	0	0	5	0	0	0	0	0	0	16	0			-0.267261	-0.267261	-0.267261	-0.267261	-0.267261	-0.267261	-0.267261	-0.267261	-0.267261	3.74166	-0.267261	-0.267261	-0.267261	-0.267261
OG0007799	N	N	Y		0	0		NA	NA	NA	NA		NA	NA		0	0	0	0	0	0	0	0	1	0	0	0	0	0	0	0	20	0			-0.267261	-0.267261	-0.267261	-0.267261	-0.267261	-0.267261	-0.267261	-0.267261	3.74166	-0.267261	-0.267261	-0.267261	-0.267261	-0.267261
OG0007802	N	N	Y		0	0		NA	NA	NA	NA		NA	NA		0	0	0	0	0	0	0	0	0	0	0	0	0	0	0	0	21	0			#NUM!	#NUM!	#NUM!	#NUM!	#NUM!	#NUM!	#NUM!	#NUM!	#NUM!	#NUM!	#NUM!	#NUM!	#NUM!	#NUM!
OG0007805	N	N	Y		0	0		NA	NA	NA	NA		NA	NA		0	0	0	0	0	0	0	0	0	0	0	0	0	0	1	0	0	20			-0.267261	-0.267261	-0.267261	-0.267261	-0.267261	-0.267261	-0.267261	-0.267261	-0.267261	-0.267261	-0.267261	-0.267261	-0.267261	-0.267261
OG0007806	N	N	Y		0	0		NA	NA	NA	NA		NA	NA		0	0	0	0	0	0	0	21	0	0	0	0	0	0	0	0	0	0			-0.267261	-0.267261	-0.267261	-0.267261	-0.267261	-0.267261	-0.267261	3.74166	-0.267261	-0.267261	-0.267261	-0.267261	-0.267261	-0.267261
OG0007859	N	N	Y		0	0		NA	NA	NA	NA		NA	NA		0	0	0	0	0	0	0	0	0	0	0	0	20	0	0	0	0	0			-0.267261	-0.267261	-0.267261	-0.267261	-0.267261	-0.267261	-0.267261	-0.267261	-0.267261	-0.267261	-0.267261	-0.267261	3.74166	-0.267261
OG0007874	N	N	Y		0	0		NA	NA	NA	NA		NA	NA		0	0	0	0	0	0	0	0	0	0	0	0	20	0	0	0	0	0			-0.267261	-0.267261	-0.267261	-0.267261	-0.267261	-0.267261	-0.267261	-0.267261	-0.267261	-0.267261	-0.267261	-0.267261	3.74166	-0.267261
OG0007964	N	N	Y		0	0		NA	NA	NA	NA		NA	NA		1	1	1	1	1	1	1	1	1	1	1	1	1	1	1	1	1	3			#NUM!	#NUM!	#NUM!	#NUM!	#NUM!	#NUM!	#NUM!	#NUM!	#NUM!	#NUM!	#NUM!	#NUM!	#NUM!	#NUM!
OG0007969	N	N	Y		0	0		NA	NA	NA	NA		NA	NA		1	1	1	1	1	1	1	1	1	1	1	1	1	1	1	2	1	2			#NUM!	#NUM!	#NUM!	#NUM!	#NUM!	#NUM!	#NUM!	#NUM!	#NUM!	#NUM!	#NUM!	#NUM!	#NUM!	#NUM!
OG0008152	N	N	Y		0	0		NA	NA	NA	NA		NA	NA		0	0	0	0	0	0	0	0	0	0	0	0	0	0	0	20	0	0			#NUM!	#NUM!	#NUM!	#NUM!	#NUM!	#NUM!	#NUM!	#NUM!	#NUM!	#NUM!	#NUM!	#NUM!	#NUM!	#NUM!
OG0008184	N	N	Y		0	0		NA	NA	NA	NA		NA	NA		0	0	0	0	0	0	0	0	0	0	0	0	0	0	0	0	20	0			#NUM!	#NUM!	#NUM!	#NUM!	#NUM!	#NUM!	#NUM!	#NUM!	#NUM!	#NUM!	#NUM!	#NUM!	#NUM!	#NUM!
OG0008186	N	N	Y		0	0		NA	NA	NA	NA		NA	NA		0	0	0	0	0	0	0	0	0	0	0	0	0	0	0	0	0	20			#NUM!	#NUM!	#NUM!	#NUM!	#NUM!	#NUM!	#NUM!	#NUM!	#NUM!	#NUM!	#NUM!	#NUM!	#NUM!	#NUM!
OG0008187	N	N	Y		0	0		NA	NA	NA	NA		NA	NA		0	0	0	0	0	0	0	0	0	0	0	0	0	0	0	0	0	20			#NUM!	#NUM!	#NUM!	#NUM!	#NUM!	#NUM!	#NUM!	#NUM!	#NUM!	#NUM!	#NUM!	#NUM!	#NUM!	#NUM!
OG0008188	N	N	Y		0	0		NA	NA	NA	NA		NA	NA		0	0	0	0	0	0	0	0	0	0	0	0	0	0	20	0	0	0			-0.267261	-0.267261	-0.267261	-0.267261	-0.267261	-0.267261	-0.267261	-0.267261	-0.267261	-0.267261	-0.267261	-0.267261	-0.267261	-0.267261
OG0008198	N	N	Y		0	0		NA	NA	NA	NA		NA	NA		1	1	1	1	1	1	1	1	1	1	1	1	1	1	1	1	1	2			#NUM!	#NUM!	#NUM!	#NUM!	#NUM!	#NUM!	#NUM!	#NUM!	#NUM!	#NUM!	#NUM!	#NUM!	#NUM!	#NUM!
OG0008199	N	N	Y		0	0		NA	NA	NA	NA		NA	NA		1	1	1	1	1	1	1	1	1	1	1	1	1	1	1	1	1	2			#NUM!	#NUM!	#NUM!	#NUM!	#NUM!	#NUM!	#NUM!	#NUM!	#NUM!	#NUM!	#NUM!	#NUM!	#NUM!	#NUM!
OG0008209	N	N	Y		0	0		NA	NA	NA	NA		NA	NA		1	1	1	1	1	1	1	1	1	1	1	1	1	1	1	1	1	2			#NUM!	#NUM!	#NUM!	#NUM!	#NUM!	#NUM!	#NUM!	#NUM!	#NUM!	#NUM!	#NUM!	#NUM!	#NUM!	#NUM!
OG0008217	N	N	Y		0	0		NA	NA	NA	NA		NA	NA		1	1	1	1	1	1	1	1	1	1	1	1	1	1	1	1	1	2			#NUM!	#NUM!	#NUM!	#NUM!	#NUM!	#NUM!	#NUM!	#NUM!	#NUM!	#NUM!	#NUM!	#NUM!	#NUM!	#NUM!
OG0008218	N	N	Y		0	0		NA	NA	NA	NA		NA	NA		1	1	1	1	1	1	1	1	1	1	1	1	1	1	1	1	1	2			#NUM!	#NUM!	#NUM!	#NUM!	#NUM!	#NUM!	#NUM!	#NUM!	#NUM!	#NUM!	#NUM!	#NUM!	#NUM!	#NUM!
OG0008245	N	N	Y		0	0		NA	NA	NA	NA		NA	NA		1	1	1	1	1	1	1	1	1	1	1	1	1	1	1	1	1	2			#NUM!	#NUM!	#NUM!	#NUM!	#NUM!	#NUM!	#NUM!	#NUM!	#NUM!	#NUM!	#NUM!	#NUM!	#NUM!	#NUM!
OG0008260	N	N	Y		0	0		NA	NA	NA	NA		NA	NA		0	0	0	0	0	0	0	0	0	0	0	0	19	0	0	0	0	0			-0.267261	-0.267261	-0.267261	-0.267261	-0.267261	-0.267261	-0.267261	-0.267261	-0.267261	-0.267261	-0.267261	-0.267261	3.74166	-0.267261
OG0008261	N	N	Y		0	0		NA	NA	NA	NA		NA	NA		1	1	1	1	1	1	1	1	1	1	1	1	1	1	1	0	2	2			#NUM!	#NUM!	#NUM!	#NUM!	#NUM!	#NUM!	#NUM!	#NUM!	#NUM!	#NUM!	#NUM!	#NUM!	#NUM!	#NUM!
OG0008278	N	N	Y		0	0		NA	NA	NA	NA		NA	NA		1	1	1	1	1	1	1	1	1	1	1	1	1	1	1	1	1	2			#NUM!	#NUM!	#NUM!	#NUM!	#NUM!	#NUM!	#NUM!	#NUM!	#NUM!	#NUM!	#NUM!	#NUM!	#NUM!	#NUM!
OG0008327	N	N	Y		0	0		NA	NA	NA	NA		NA	NA		1	1	1	1	1	1	1	1	1	1	1	1	1	1	1	1	1	2			#NUM!	#NUM!	#NUM!	#NUM!	#NUM!	#NUM!	#NUM!	#NUM!	#NUM!	#NUM!	#NUM!	#NUM!	#NUM!	#NUM!
OG0008336	N	N	Y		0	0		NA	NA	NA	NA		NA	NA		1	1	1	1	1	1	1	1	1	1	1	1	1	1	1	1	2	1			#NUM!	#NUM!	#NUM!	#NUM!	#NUM!	#NUM!	#NUM!	#NUM!	#NUM!	#NUM!	#NUM!	#NUM!	#NUM!	#NUM!
OG0008354	N	N	Y		0	0		NA	NA	NA	NA		NA	NA		1	1	1	1	1	1	1	1	1	1	1	1	1	1	1	1	1	2			#NUM!	#NUM!	#NUM!	#NUM!	#NUM!	#NUM!	#NUM!	#NUM!	#NUM!	#NUM!	#NUM!	#NUM!	#NUM!	#NUM!
OG0008508	N	N	Y		0	0		NA	NA	NA	NA		NA	NA		0	0	0	0	0	0	0	0	0	16	0	0	0	0	0	3	0	0			-0.267261	-0.267261	-0.267261	-0.267261	-0.267261	-0.267261	-0.267261	-0.267261	-0.267261	3.74166	-0.267261	-0.267261	-0.267261	-0.267261
OG0008525	N	N	Y		0	0		NA	NA	NA	NA		NA	NA		0	0	19	0	0	0	0	0	0	0	0	0	0	0	0	0	0	0			-0.267261	-0.267261	3.74166	-0.267261	-0.267261	-0.267261	-0.267261	-0.267261	-0.267261	-0.267261	-0.267261	-0.267261	-0.267261	-0.267261
OG0008531	N	N	Y		0	0		NA	NA	NA	NA		NA	NA		0	0	0	0	0	0	0	0	0	19	0	0	0	0	0	0	0	0			-0.267261	-0.267261	-0.267261	-0.267261	-0.267261	-0.267261	-0.267261	-0.267261	-0.267261	3.74166	-0.267261	-0.267261	-0.267261	-0.267261
OG0008532	N	N	Y		0	0		NA	NA	NA	NA		NA	NA		0	0	0	0	0	0	0	0	0	19	0	0	0	0	0	0	0	0			-0.267261	-0.267261	-0.267261	-0.267261	-0.267261	-0.267261	-0.267261	-0.267261	-0.267261	3.74166	-0.267261	-0.267261	-0.267261	-0.267261
OG0008555	N	N	Y		0	0		NA	NA	NA	NA		NA	NA		19	0	0	0	0	0	0	0	0	0	0	0	0	0	0	0	0	0			3.74166	-0.267261	-0.267261	-0.267261	-0.267261	-0.267261	-0.267261	-0.267261	-0.267261	-0.267261	-0.267261	-0.267261	-0.267261	-0.267261
OG0008559	N	N	Y		0	0		NA	NA	NA	NA		NA	NA		1	1	1	1	1	1	1	1	1	1	1	1	1	1	1	1	1	1			#NUM!	#NUM!	#NUM!	#NUM!	#NUM!	#NUM!	#NUM!	#NUM!	#NUM!	#NUM!	#NUM!	#NUM!	#NUM!	#NUM!
OG0008570	N	N	Y		0	0		NA	NA	NA	NA		NA	NA		1	1	1	1	1	1	1	1	1	1	1	1	1	1	1	1	1	1			#NUM!	#NUM!	#NUM!	#NUM!	#NUM!	#NUM!	#NUM!	#NUM!	#NUM!	#NUM!	#NUM!	#NUM!	#NUM!	#NUM!
OG0008584	N	N	Y		0	0		NA	NA	NA	NA		NA	NA		1	1	1	1	1	1	1	1	1	1	1	1	1	1	1	1	1	1			#NUM!	#NUM!	#NUM!	#NUM!	#NUM!	#NUM!	#NUM!	#NUM!	#NUM!	#NUM!	#NUM!	#NUM!	#NUM!	#NUM!
OG0008639	N	N	Y		0	0		NA	NA	NA	NA		NA	NA		1	1	1	1	1	1	1	1	1	1	1	1	1	1	1	1	1	1			#NUM!	#NUM!	#NUM!	#NUM!	#NUM!	#NUM!	#NUM!	#NUM!	#NUM!	#NUM!	#NUM!	#NUM!	#NUM!	#NUM!
OG0008644	N	N	Y		0	0		NA	NA	NA	NA		NA	NA		1	1	1	1	1	1	1	1	1	1	1	1	1	1	1	1	1	1			#NUM!	#NUM!	#NUM!	#NUM!	#NUM!	#NUM!	#NUM!	#NUM!	#NUM!	#NUM!	#NUM!	#NUM!	#NUM!	#NUM!
OG0008648	N	N	Y		0	0		NA	NA	NA	NA		NA	NA		1	1	1	1	1	1	1	1	1	1	1	1	1	1	1	1	0	2			#NUM!	#NUM!	#NUM!	#NUM!	#NUM!	#NUM!	#NUM!	#NUM!	#NUM!	#NUM!	#NUM!	#NUM!	#NUM!	#NUM!
OG0008655	N	N	Y		0	0		NA	NA	NA	NA		NA	NA		1	1	1	1	1	1	1	1	1	1	1	1	1	1	1	1	1	1			#NUM!	#NUM!	#NUM!	#NUM!	#NUM!	#NUM!	#NUM!	#NUM!	#NUM!	#NUM!	#NUM!	#NUM!	#NUM!	#NUM!
OG0008675	N	N	Y		0	0		NA	NA	NA	NA		NA	NA		1	1	1	1	1	1	1	1	1	1	1	1	1	1	1	1	1	1			#NUM!	#NUM!	#NUM!	#NUM!	#NUM!	#NUM!	#NUM!	#NUM!	#NUM!	#NUM!	#NUM!	#NUM!	#NUM!	#NUM!
OG0008755	N	N	Y		0	0		NA	NA	NA	NA		NA	NA		0	0	0	18	0	0	0	0	0	0	0	0	0	0	0	0	0	0			-0.267261	-0.267261	-0.267261	3.74166	-0.267261	-0.267261	-0.267261	-0.267261	-0.267261	-0.267261	-0.267261	-0.267261	-0.267261	-0.267261
OG0008861	N	N	Y		0	0		NA	NA	NA	NA		NA	NA		0	0	0	0	0	0	0	0	0	1	0	0	0	0	0	0	17	0			-0.267261	-0.267261	-0.267261	-0.267261	-0.267261	-0.267261	-0.267261	-0.267261	-0.267261	3.74166	-0.267261	-0.267261	-0.267261	-0.267261
OG0008873	N	N	Y		0	0		NA	NA	NA	NA		NA	NA		0	0	0	0	0	0	0	0	0	0	18	0	0	0	0	0	0	0			-0.267261	-0.267261	-0.267261	-0.267261	-0.267261	-0.267261	-0.267261	-0.267261	-0.267261	-0.267261	3.74166	-0.267261	-0.267261	-0.267261
OG0008876	N	N	Y		0	0		NA	NA	NA	NA		NA	NA		0	18	0	0	0	0	0	0	0	0	0	0	0	0	0	0	0	0			-0.267261	3.74166	-0.267261	-0.267261	-0.267261	-0.267261	-0.267261	-0.267261	-0.267261	-0.267261	-0.267261	-0.267261	-0.267261	-0.267261
OG0008878	N	N	Y		0	0		NA	NA	NA	NA		NA	NA		0	0	0	0	18	0	0	0	0	0	0	0	0	0	0	0	0	0			-0.267261	-0.267261	-0.267261	-0.267261	3.74166	-0.267261	-0.267261	-0.267261	-0.267261	-0.267261	-0.267261	-0.267261	-0.267261	-0.267261
OG0008882	N	N	Y		0	0		NA	NA	NA	NA		NA	NA		18	0	0	0	0	0	0	0	0	0	0	0	0	0	0	0	0	0			3.74166	-0.267261	-0.267261	-0.267261	-0.267261	-0.267261	-0.267261	-0.267261	-0.267261	-0.267261	-0.267261	-0.267261	-0.267261	-0.267261
OG0008883	N	N	Y		0	0		NA	NA	NA	NA		NA	NA		18	0	0	0	0	0	0	0	0	0	0	0	0	0	0	0	0	0			3.74166	-0.267261	-0.267261	-0.267261	-0.267261	-0.267261	-0.267261	-0.267261	-0.267261	-0.267261	-0.267261	-0.267261	-0.267261	-0.267261
OG0008884	N	N	Y		0	0		NA	NA	NA	NA		NA	NA		0	0	0	0	0	0	0	0	0	0	0	0	0	0	0	0	0	18			#NUM!	#NUM!	#NUM!	#NUM!	#NUM!	#NUM!	#NUM!	#NUM!	#NUM!	#NUM!	#NUM!	#NUM!	#NUM!	#NUM!
OG0008885	N	N	Y		0	0		NA	NA	NA	NA		NA	NA		0	0	0	0	0	0	0	0	0	0	0	0	0	0	0	0	0	18			#NUM!	#NUM!	#NUM!	#NUM!	#NUM!	#NUM!	#NUM!	#NUM!	#NUM!	#NUM!	#NUM!	#NUM!	#NUM!	#NUM!
OG0008886	N	N	Y		0	0		NA	NA	NA	NA		NA	NA		0	0	0	0	0	0	0	0	0	0	0	0	0	0	0	0	0	18			#NUM!	#NUM!	#NUM!	#NUM!	#NUM!	#NUM!	#NUM!	#NUM!	#NUM!	#NUM!	#NUM!	#NUM!	#NUM!	#NUM!
OG0008904	N	N	Y		0	0		NA	NA	NA	NA		NA	NA		0	0	0	0	0	0	0	0	0	0	0	0	17	0	0	0	0	0			-0.267261	-0.267261	-0.267261	-0.267261	-0.267261	-0.267261	-0.267261	-0.267261	-0.267261	-0.267261	-0.267261	-0.267261	3.74166	-0.267261
OG0008905	N	N	Y		0	0		NA	NA	NA	NA		NA	NA		0	0	0	0	0	0	0	0	0	0	0	0	17	0	0	0	0	0			-0.267261	-0.267261	-0.267261	-0.267261	-0.267261	-0.267261	-0.267261	-0.267261	-0.267261	-0.267261	-0.267261	-0.267261	3.74166	-0.267261
OG0008933	N	N	Y		0	0		NA	NA	NA	NA		NA	NA		1	1	1	1	1	1	1	1	1	1	1	1	1	1	1	0	1	1			#NUM!	#NUM!	#NUM!	#NUM!	#NUM!	#NUM!	#NUM!	#NUM!	#NUM!	#NUM!	#NUM!	#NUM!	#NUM!	#NUM!
OG0009129	N	N	Y		0	0		NA	NA	NA	NA		NA	NA		1	0	0	0	0	0	0	0	0	0	0	0	0	0	0	16	0	0			3.74166	-0.267261	-0.267261	-0.267261	-0.267261	-0.267261	-0.267261	-0.267261	-0.267261	-0.267261	-0.267261	-0.267261	-0.267261	-0.267261
OG0009134	N	N	Y		0	0		NA	NA	NA	NA		NA	NA		0	0	0	0	0	0	0	3	0	0	0	0	0	0	0	12	2	0			-0.267261	-0.267261	-0.267261	-0.267261	-0.267261	-0.267261	-0.267261	3.74166	-0.267261	-0.267261	-0.267261	-0.267261	-0.267261	-0.267261
OG0009158	N	N	Y		0	0		NA	NA	NA	NA		NA	NA		0	0	17	0	0	0	0	0	0	0	0	0	0	0	0	0	0	0			-0.267261	-0.267261	3.74166	-0.267261	-0.267261	-0.267261	-0.267261	-0.267261	-0.267261	-0.267261	-0.267261	-0.267261	-0.267261	-0.267261
OG0009163	N	N	Y		0	0		NA	NA	NA	NA		NA	NA		0	0	0	0	0	0	0	0	0	17	0	0	0	0	0	0	0	0			-0.267261	-0.267261	-0.267261	-0.267261	-0.267261	-0.267261	-0.267261	-0.267261	-0.267261	3.74166	-0.267261	-0.267261	-0.267261	-0.267261
OG0009174	N	N	Y		0	0		NA	NA	NA	NA		NA	NA		0	0	0	0	0	0	0	0	0	0	17	0	0	0	0	0	0	0			-0.267261	-0.267261	-0.267261	-0.267261	-0.267261	-0.267261	-0.267261	-0.267261	-0.267261	-0.267261	3.74166	-0.267261	-0.267261	-0.267261
OG0009175	N	N	Y		0	0		NA	NA	NA	NA		NA	NA		0	0	0	0	0	0	0	0	0	0	17	0	0	0	0	0	0	0			-0.267261	-0.267261	-0.267261	-0.267261	-0.267261	-0.267261	-0.267261	-0.267261	-0.267261	-0.267261	3.74166	-0.267261	-0.267261	-0.267261
OG0009176	N	N	Y		0	0		NA	NA	NA	NA		NA	NA		0	17	0	0	0	0	0	0	0	0	0	0	0	0	0	0	0	0			-0.267261	3.74166	-0.267261	-0.267261	-0.267261	-0.267261	-0.267261	-0.267261	-0.267261	-0.267261	-0.267261	-0.267261	-0.267261	-0.267261
OG0009185	N	N	Y		0	0		NA	NA	NA	NA		NA	NA		0	0	0	0	17	0	0	0	0	0	0	0	0	0	0	0	0	0			-0.267261	-0.267261	-0.267261	-0.267261	3.74166	-0.267261	-0.267261	-0.267261	-0.267261	-0.267261	-0.267261	-0.267261	-0.267261	-0.267261
OG0009191	N	N	Y		0	0		NA	NA	NA	NA		NA	NA		0	0	0	0	0	0	17	0	0	0	0	0	0	0	0	0	0	0			-0.267261	-0.267261	-0.267261	-0.267261	-0.267261	-0.267261	3.74166	-0.267261	-0.267261	-0.267261	-0.267261	-0.267261	-0.267261	-0.267261
OG0009192	N	N	Y		0	0		NA	NA	NA	NA		NA	NA		17	0	0	0	0	0	0	0	0	0	0	0	0	0	0	0	0	0			3.74166	-0.267261	-0.267261	-0.267261	-0.267261	-0.267261	-0.267261	-0.267261	-0.267261	-0.267261	-0.267261	-0.267261	-0.267261	-0.267261
OG0009193	N	N	Y		0	0		NA	NA	NA	NA		NA	NA		0	0	0	0	0	0	0	0	0	0	0	0	0	0	17	0	0	0			-0.267261	-0.267261	-0.267261	-0.267261	-0.267261	-0.267261	-0.267261	-0.267261	-0.267261	-0.267261	-0.267261	-0.267261	-0.267261	-0.267261
OG0009204	N	N	Y		0	0		NA	NA	NA	NA		NA	NA		0	0	0	0	0	0	0	0	0	0	0	0	16	0	0	0	0	0			-0.267261	-0.267261	-0.267261	-0.267261	-0.267261	-0.267261	-0.267261	-0.267261	-0.267261	-0.267261	-0.267261	-0.267261	3.74166	-0.267261
OG0009206	N	N	Y		0	0		NA	NA	NA	NA		NA	NA		0	0	0	0	0	0	0	0	0	0	0	0	16	0	0	0	0	0			-0.267261	-0.267261	-0.267261	-0.267261	-0.267261	-0.267261	-0.267261	-0.267261	-0.267261	-0.267261	-0.267261	-0.267261	3.74166	-0.267261
OG0009211	N	N	Y		0	0		NA	NA	NA	NA		NA	NA		0	0	0	0	0	0	0	0	0	0	0	0	16	0	0	0	0	0			-0.267261	-0.267261	-0.267261	-0.267261	-0.267261	-0.267261	-0.267261	-0.267261	-0.267261	-0.267261	-0.267261	-0.267261	3.74166	-0.267261
OG0009258	N	N	Y		0	0		NA	NA	NA	NA		NA	NA		0	0	0	16	0	0	0	0	0	0	0	0	0	0	0	0	0	0			-0.267261	-0.267261	-0.267261	3.74166	-0.267261	-0.267261	-0.267261	-0.267261	-0.267261	-0.267261	-0.267261	-0.267261	-0.267261	-0.267261
OG0009402	N	N	Y		0	0		NA	NA	NA	NA		NA	NA		0	0	0	0	0	0	0	0	1	0	0	0	0	0	0	15	0	0			-0.267261	-0.267261	-0.267261	-0.267261	-0.267261	-0.267261	-0.267261	-0.267261	3.74166	-0.267261	-0.267261	-0.267261	-0.267261	-0.267261
OG0009409	N	N	Y		0	0		NA	NA	NA	NA		NA	NA		0	0	0	0	0	0	0	0	0	0	0	0	0	0	0	16	0	0			#NUM!	#NUM!	#NUM!	#NUM!	#NUM!	#NUM!	#NUM!	#NUM!	#NUM!	#NUM!	#NUM!	#NUM!	#NUM!	#NUM!
OG0009460	N	N	Y		0	0		NA	NA	NA	NA		NA	NA		0	0	0	0	0	0	0	0	0	15	0	0	0	0	0	0	1	0			-0.267261	-0.267261	-0.267261	-0.267261	-0.267261	-0.267261	-0.267261	-0.267261	-0.267261	3.74166	-0.267261	-0.267261	-0.267261	-0.267261
OG0009466	N	N	Y		0	0		NA	NA	NA	NA		NA	NA		0	0	0	0	0	0	0	0	16	0	0	0	0	0	0	0	0	0			-0.267261	-0.267261	-0.267261	-0.267261	-0.267261	-0.267261	-0.267261	-0.267261	3.74166	-0.267261	-0.267261	-0.267261	-0.267261	-0.267261
OG0009469	N	N	Y		0	0		NA	NA	NA	NA		NA	NA		0	0	0	0	0	0	0	0	0	0	16	0	0	0	0	0	0	0			-0.267261	-0.267261	-0.267261	-0.267261	-0.267261	-0.267261	-0.267261	-0.267261	-0.267261	-0.267261	3.74166	-0.267261	-0.267261	-0.267261
OG0009470	N	N	Y		0	0		NA	NA	NA	NA		NA	NA		0	16	0	0	0	0	0	0	0	0	0	0	0	0	0	0	0	0			-0.267261	3.74166	-0.267261	-0.267261	-0.267261	-0.267261	-0.267261	-0.267261	-0.267261	-0.267261	-0.267261	-0.267261	-0.267261	-0.267261
OG0009475	N	N	Y		0	0		NA	NA	NA	NA		NA	NA		0	0	0	0	0	16	0	0	0	0	0	0	0	0	0	0	0	0			-0.267261	-0.267261	-0.267261	-0.267261	-0.267261	3.74166	-0.267261	-0.267261	-0.267261	-0.267261	-0.267261	-0.267261	-0.267261	-0.267261
OG0009485	N	N	Y		0	0		NA	NA	NA	NA		NA	NA		16	0	0	0	0	0	0	0	0	0	0	0	0	0	0	0	0	0			3.74166	-0.267261	-0.267261	-0.267261	-0.267261	-0.267261	-0.267261	-0.267261	-0.267261	-0.267261	-0.267261	-0.267261	-0.267261	-0.267261
OG0009486	N	N	Y		0	0		NA	NA	NA	NA		NA	NA		0	0	0	0	0	0	0	0	0	0	0	0	0	0	0	0	0	16			#NUM!	#NUM!	#NUM!	#NUM!	#NUM!	#NUM!	#NUM!	#NUM!	#NUM!	#NUM!	#NUM!	#NUM!	#NUM!	#NUM!
OG0009487	N	N	Y		0	0		NA	NA	NA	NA		NA	NA		0	0	0	0	0	0	0	0	0	0	0	0	0	0	0	0	0	16			#NUM!	#NUM!	#NUM!	#NUM!	#NUM!	#NUM!	#NUM!	#NUM!	#NUM!	#NUM!	#NUM!	#NUM!	#NUM!	#NUM!
OG0009488	N	N	Y		0	0		NA	NA	NA	NA		NA	NA		0	0	0	0	0	0	0	0	0	0	0	0	0	0	0	0	0	16			#NUM!	#NUM!	#NUM!	#NUM!	#NUM!	#NUM!	#NUM!	#NUM!	#NUM!	#NUM!	#NUM!	#NUM!	#NUM!	#NUM!
OG0009496	N	N	Y		0	0		NA	NA	NA	NA		NA	NA		0	0	0	0	0	0	0	0	0	0	0	0	15	0	0	0	0	0			-0.267261	-0.267261	-0.267261	-0.267261	-0.267261	-0.267261	-0.267261	-0.267261	-0.267261	-0.267261	-0.267261	-0.267261	3.74166	-0.267261
OG0009680	N	N	Y		0	0		NA	NA	NA	NA		NA	NA		0	0	0	0	0	0	0	0	0	0	0	0	0	0	0	15	0	0			#NUM!	#NUM!	#NUM!	#NUM!	#NUM!	#NUM!	#NUM!	#NUM!	#NUM!	#NUM!	#NUM!	#NUM!	#NUM!	#NUM!
OG0009692	N	N	Y		0	0		NA	NA	NA	NA		NA	NA		0	0	0	0	0	0	0	0	0	1	0	0	0	0	0	1	4	9			-0.267261	-0.267261	-0.267261	-0.267261	-0.267261	-0.267261	-0.267261	-0.267261	-0.267261	3.74166	-0.267261	-0.267261	-0.267261	-0.267261
OG0009710	N	N	Y		0	0		NA	NA	NA	NA		NA	NA		0	0	15	0	0	0	0	0	0	0	0	0	0	0	0	0	0	0			-0.267261	-0.267261	3.74166	-0.267261	-0.267261	-0.267261	-0.267261	-0.267261	-0.267261	-0.267261	-0.267261	-0.267261	-0.267261	-0.267261
OG0009735	N	N	Y		0	0		NA	NA	NA	NA		NA	NA		0	0	0	0	0	0	0	0	0	14	0	0	0	0	0	0	1	0			-0.267261	-0.267261	-0.267261	-0.267261	-0.267261	-0.267261	-0.267261	-0.267261	-0.267261	3.74166	-0.267261	-0.267261	-0.267261	-0.267261
OG0009739	N	N	Y		0	0		NA	NA	NA	NA		NA	NA		0	0	0	0	0	0	0	0	0	9	0	0	0	0	0	0	6	0			-0.267261	-0.267261	-0.267261	-0.267261	-0.267261	-0.267261	-0.267261	-0.267261	-0.267261	3.74166	-0.267261	-0.267261	-0.267261	-0.267261
OG0009747	N	N	Y		0	0		NA	NA	NA	NA		NA	NA		0	0	0	0	0	0	0	0	15	0	0	0	0	0	0	0	0	0			-0.267261	-0.267261	-0.267261	-0.267261	-0.267261	-0.267261	-0.267261	-0.267261	3.74166	-0.267261	-0.267261	-0.267261	-0.267261	-0.267261
OG0009748	N	N	Y		0	0		NA	NA	NA	NA		NA	NA		0	0	0	0	0	0	0	0	15	0	0	0	0	0	0	0	0	0			-0.267261	-0.267261	-0.267261	-0.267261	-0.267261	-0.267261	-0.267261	-0.267261	3.74166	-0.267261	-0.267261	-0.267261	-0.267261	-0.267261
OG0009752	N	N	Y		0	0		NA	NA	NA	NA		NA	NA		0	0	0	0	0	0	0	0	0	0	15	0	0	0	0	0	0	0			-0.267261	-0.267261	-0.267261	-0.267261	-0.267261	-0.267261	-0.267261	-0.267261	-0.267261	-0.267261	3.74166	-0.267261	-0.267261	-0.267261
OG0009758	N	N	Y		0	0		NA	NA	NA	NA		NA	NA		0	0	0	0	0	15	0	0	0	0	0	0	0	0	0	0	0	0			-0.267261	-0.267261	-0.267261	-0.267261	-0.267261	3.74166	-0.267261	-0.267261	-0.267261	-0.267261	-0.267261	-0.267261	-0.267261	-0.267261
OG0009762	N	N	Y		0	0		NA	NA	NA	NA		NA	NA		0	0	0	0	0	5	0	0	0	0	0	0	0	0	0	0	10	0			-0.267261	-0.267261	-0.267261	-0.267261	-0.267261	3.74166	-0.267261	-0.267261	-0.267261	-0.267261	-0.267261	-0.267261	-0.267261	-0.267261
OG0009768	N	N	Y		0	0		NA	NA	NA	NA		NA	NA		15	0	0	0	0	0	0	0	0	0	0	0	0	0	0	0	0	0			3.74166	-0.267261	-0.267261	-0.267261	-0.267261	-0.267261	-0.267261	-0.267261	-0.267261	-0.267261	-0.267261	-0.267261	-0.267261	-0.267261
OG0009769	N	N	Y		0	0		NA	NA	NA	NA		NA	NA		0	0	0	0	0	0	0	0	0	0	0	0	0	0	0	0	0	15			#NUM!	#NUM!	#NUM!	#NUM!	#NUM!	#NUM!	#NUM!	#NUM!	#NUM!	#NUM!	#NUM!	#NUM!	#NUM!	#NUM!
OG0009770	N	N	Y		0	0		NA	NA	NA	NA		NA	NA		0	0	0	0	0	0	0	0	0	0	0	0	0	0	6	0	0	9			-0.267261	-0.267261	-0.267261	-0.267261	-0.267261	-0.267261	-0.267261	-0.267261	-0.267261	-0.267261	-0.267261	-0.267261	-0.267261	-0.267261
OG0009836	N	N	Y		0	0		NA	NA	NA	NA		NA	NA		0	0	0	14	0	0	0	0	0	0	0	0	0	0	0	0	0	0			-0.267261	-0.267261	-0.267261	3.74166	-0.267261	-0.267261	-0.267261	-0.267261	-0.267261	-0.267261	-0.267261	-0.267261	-0.267261	-0.267261
OG0009959	N	N	Y		0	0		NA	NA	NA	NA		NA	NA		0	0	0	0	0	0	0	0	0	0	0	0	0	0	0	14	0	0			#NUM!	#NUM!	#NUM!	#NUM!	#NUM!	#NUM!	#NUM!	#NUM!	#NUM!	#NUM!	#NUM!	#NUM!	#NUM!	#NUM!
OG0009965	N	N	Y		0	0		NA	NA	NA	NA		NA	NA		0	0	0	0	0	0	0	3	0	0	0	0	0	0	0	10	1	0			-0.267261	-0.267261	-0.267261	-0.267261	-0.267261	-0.267261	-0.267261	3.74166	-0.267261	-0.267261	-0.267261	-0.267261	-0.267261	-0.267261
OG0009972	N	N	Y		0	0		NA	NA	NA	NA		NA	NA		0	0	0	0	0	0	0	0	0	0	0	0	0	0	0	1	13	0			#NUM!	#NUM!	#NUM!	#NUM!	#NUM!	#NUM!	#NUM!	#NUM!	#NUM!	#NUM!	#NUM!	#NUM!	#NUM!	#NUM!
OG0009978	N	N	Y		0	0		NA	NA	NA	NA		NA	NA		0	0	0	0	0	0	0	0	0	0	0	0	0	0	0	9	5	0			#NUM!	#NUM!	#NUM!	#NUM!	#NUM!	#NUM!	#NUM!	#NUM!	#NUM!	#NUM!	#NUM!	#NUM!	#NUM!	#NUM!
OG0010001	N	N	Y		0	0		NA	NA	NA	NA		NA	NA		0	0	0	0	0	0	0	0	0	0	13	0	0	0	0	1	0	0			-0.267261	-0.267261	-0.267261	-0.267261	-0.267261	-0.267261	-0.267261	-0.267261	-0.267261	-0.267261	3.74166	-0.267261	-0.267261	-0.267261
OG0010018	N	N	Y		0	0		NA	NA	NA	NA		NA	NA		0	0	0	0	0	0	0	0	0	0	0	14	0	0	0	0	0	0			-0.267261	-0.267261	-0.267261	-0.267261	-0.267261	-0.267261	-0.267261	-0.267261	-0.267261	-0.267261	-0.267261	3.74166	-0.267261	-0.267261
OG0010020	N	N	Y		0	0		NA	NA	NA	NA		NA	NA		0	0	0	0	0	0	0	0	0	6	0	0	0	0	0	0	8	0			-0.267261	-0.267261	-0.267261	-0.267261	-0.267261	-0.267261	-0.267261	-0.267261	-0.267261	3.74166	-0.267261	-0.267261	-0.267261	-0.267261
OG0010027	N	N	Y		0	0		NA	NA	NA	NA		NA	NA		0	0	0	0	0	0	0	0	0	14	0	0	0	0	0	0	0	0			-0.267261	-0.267261	-0.267261	-0.267261	-0.267261	-0.267261	-0.267261	-0.267261	-0.267261	3.74166	-0.267261	-0.267261	-0.267261	-0.267261
OG0010042	N	N	Y		0	0		NA	NA	NA	NA		NA	NA		0	0	0	0	0	0	0	0	0	0	14	0	0	0	0	0	0	0			-0.267261	-0.267261	-0.267261	-0.267261	-0.267261	-0.267261	-0.267261	-0.267261	-0.267261	-0.267261	3.74166	-0.267261	-0.267261	-0.267261
OG0010043	N	N	Y		0	0		NA	NA	NA	NA		NA	NA		0	0	0	0	0	0	0	0	0	0	14	0	0	0	0	0	0	0			-0.267261	-0.267261	-0.267261	-0.267261	-0.267261	-0.267261	-0.267261	-0.267261	-0.267261	-0.267261	3.74166	-0.267261	-0.267261	-0.267261
OG0010045	N	N	Y		0	0		NA	NA	NA	NA		NA	NA		0	14	0	0	0	0	0	0	0	0	0	0	0	0	0	0	0	0			-0.267261	3.74166	-0.267261	-0.267261	-0.267261	-0.267261	-0.267261	-0.267261	-0.267261	-0.267261	-0.267261	-0.267261	-0.267261	-0.267261
OG0010050	N	N	Y		0	0		NA	NA	NA	NA		NA	NA		0	0	0	0	0	13	0	0	0	0	0	0	0	0	0	0	0	1			-0.267261	-0.267261	-0.267261	-0.267261	-0.267261	3.74166	-0.267261	-0.267261	-0.267261	-0.267261	-0.267261	-0.267261	-0.267261	-0.267261
OG0010051	N	N	Y		0	0		NA	NA	NA	NA		NA	NA		0	0	0	0	0	0	0	0	0	0	0	0	0	0	0	0	14	0			#NUM!	#NUM!	#NUM!	#NUM!	#NUM!	#NUM!	#NUM!	#NUM!	#NUM!	#NUM!	#NUM!	#NUM!	#NUM!	#NUM!
OG0010059	N	N	Y		0	0		NA	NA	NA	NA		NA	NA		0	0	0	0	0	0	0	14	0	0	0	0	0	0	0	0	0	0			-0.267261	-0.267261	-0.267261	-0.267261	-0.267261	-0.267261	-0.267261	3.74166	-0.267261	-0.267261	-0.267261	-0.267261	-0.267261	-0.267261
OG0010264	N	N	Y		0	0		NA	NA	NA	NA		NA	NA		0	1	0	0	0	0	0	0	0	0	0	0	0	0	0	12	0	0			-0.267261	3.74166	-0.267261	-0.267261	-0.267261	-0.267261	-0.267261	-0.267261	-0.267261	-0.267261	-0.267261	-0.267261	-0.267261	-0.267261
OG0010265	N	N	Y		0	0		NA	NA	NA	NA		NA	NA		0	0	0	0	1	0	0	0	0	0	0	0	0	0	0	10	0	2			-0.267261	-0.267261	-0.267261	-0.267261	3.74166	-0.267261	-0.267261	-0.267261	-0.267261	-0.267261	-0.267261	-0.267261	-0.267261	-0.267261
OG0010269	N	N	Y		0	0		NA	NA	NA	NA		NA	NA		0	0	0	0	0	1	0	0	0	0	0	0	0	0	0	4	8	0			-0.267261	-0.267261	-0.267261	-0.267261	-0.267261	3.74166	-0.267261	-0.267261	-0.267261	-0.267261	-0.267261	-0.267261	-0.267261	-0.267261
OG0010272	N	N	Y		0	0		NA	NA	NA	NA		NA	NA		0	0	0	0	0	0	0	0	1	0	0	0	0	0	0	4	8	0			-0.267261	-0.267261	-0.267261	-0.267261	-0.267261	-0.267261	-0.267261	-0.267261	3.74166	-0.267261	-0.267261	-0.267261	-0.267261	-0.267261
OG0010284	N	N	Y		0	0		NA	NA	NA	NA		NA	NA		0	0	0	0	0	0	0	1	0	0	0	0	0	0	0	11	1	0			-0.267261	-0.267261	-0.267261	-0.267261	-0.267261	-0.267261	-0.267261	3.74166	-0.267261	-0.267261	-0.267261	-0.267261	-0.267261	-0.267261
OG0010316	N	N	Y		0	0		NA	NA	NA	NA		NA	NA		0	0	12	0	0	0	0	0	0	0	0	0	0	0	0	0	0	1			-0.267261	-0.267261	3.74166	-0.267261	-0.267261	-0.267261	-0.267261	-0.267261	-0.267261	-0.267261	-0.267261	-0.267261	-0.267261	-0.267261
OG0010334	N	N	Y		0	0		NA	NA	NA	NA		NA	NA		0	0	0	0	0	0	0	0	0	1	0	0	0	0	0	0	12	0			-0.267261	-0.267261	-0.267261	-0.267261	-0.267261	-0.267261	-0.267261	-0.267261	-0.267261	3.74166	-0.267261	-0.267261	-0.267261	-0.267261
OG0010335	N	N	Y		0	0		NA	NA	NA	NA		NA	NA		0	0	0	0	0	0	0	0	0	13	0	0	0	0	0	0	0	0			-0.267261	-0.267261	-0.267261	-0.267261	-0.267261	-0.267261	-0.267261	-0.267261	-0.267261	3.74166	-0.267261	-0.267261	-0.267261	-0.267261
OG0010345	N	N	Y		0	0		NA	NA	NA	NA		NA	NA		0	0	0	0	0	0	0	0	13	0	0	0	0	0	0	0	0	0			-0.267261	-0.267261	-0.267261	-0.267261	-0.267261	-0.267261	-0.267261	-0.267261	3.74166	-0.267261	-0.267261	-0.267261	-0.267261	-0.267261
OG0010357	N	N	Y		0	0		NA	NA	NA	NA		NA	NA		0	0	0	0	0	0	0	0	0	0	13	0	0	0	0	0	0	0			-0.267261	-0.267261	-0.267261	-0.267261	-0.267261	-0.267261	-0.267261	-0.267261	-0.267261	-0.267261	3.74166	-0.267261	-0.267261	-0.267261
OG0010361	N	N	Y		0	0		NA	NA	NA	NA		NA	NA		0	0	0	0	0	0	0	0	0	0	13	0	0	0	0	0	0	0			-0.267261	-0.267261	-0.267261	-0.267261	-0.267261	-0.267261	-0.267261	-0.267261	-0.267261	-0.267261	3.74166	-0.267261	-0.267261	-0.267261
OG0010371	N	N	Y		0	0		NA	NA	NA	NA		NA	NA		0	0	0	0	0	0	0	0	0	0	0	0	0	0	0	0	13	0			#NUM!	#NUM!	#NUM!	#NUM!	#NUM!	#NUM!	#NUM!	#NUM!	#NUM!	#NUM!	#NUM!	#NUM!	#NUM!	#NUM!
OG0010372	N	N	Y		0	0		NA	NA	NA	NA		NA	NA		0	0	0	0	0	0	0	0	0	0	0	0	0	0	0	0	13	0			#NUM!	#NUM!	#NUM!	#NUM!	#NUM!	#NUM!	#NUM!	#NUM!	#NUM!	#NUM!	#NUM!	#NUM!	#NUM!	#NUM!
OG0010381	N	N	Y		0	0		NA	NA	NA	NA		NA	NA		13	0	0	0	0	0	0	0	0	0	0	0	0	0	0	0	0	0			3.74166	-0.267261	-0.267261	-0.267261	-0.267261	-0.267261	-0.267261	-0.267261	-0.267261	-0.267261	-0.267261	-0.267261	-0.267261	-0.267261
OG0010382	N	N	Y		0	0		NA	NA	NA	NA		NA	NA		0	0	0	0	0	0	0	0	0	0	0	0	0	0	0	0	0	13			#NUM!	#NUM!	#NUM!	#NUM!	#NUM!	#NUM!	#NUM!	#NUM!	#NUM!	#NUM!	#NUM!	#NUM!	#NUM!	#NUM!
OG0010383	N	N	Y		0	0		NA	NA	NA	NA		NA	NA		0	0	0	0	0	0	0	0	0	0	0	0	0	0	0	0	0	13			#NUM!	#NUM!	#NUM!	#NUM!	#NUM!	#NUM!	#NUM!	#NUM!	#NUM!	#NUM!	#NUM!	#NUM!	#NUM!	#NUM!
OG0010398	N	N	Y		0	0		NA	NA	NA	NA		NA	NA		0	0	0	0	0	0	0	0	0	0	0	0	12	0	0	0	0	0			-0.267261	-0.267261	-0.267261	-0.267261	-0.267261	-0.267261	-0.267261	-0.267261	-0.267261	-0.267261	-0.267261	-0.267261	3.74166	-0.267261
OG0010588	N	N	Y		0	0		NA	NA	NA	NA		NA	NA		0	0	0	0	0	0	0	0	0	0	0	0	0	0	0	12	0	0			#NUM!	#NUM!	#NUM!	#NUM!	#NUM!	#NUM!	#NUM!	#NUM!	#NUM!	#NUM!	#NUM!	#NUM!	#NUM!	#NUM!
OG0010596	N	N	Y		0	0		NA	NA	NA	NA		NA	NA		0	0	0	0	0	0	0	0	0	0	0	0	0	0	0	10	0	2			#NUM!	#NUM!	#NUM!	#NUM!	#NUM!	#NUM!	#NUM!	#NUM!	#NUM!	#NUM!	#NUM!	#NUM!	#NUM!	#NUM!
OG0010599	N	N	Y		0	0		NA	NA	NA	NA		NA	NA		0	0	0	0	0	0	0	2	0	0	0	0	0	0	0	9	1	0			-0.267261	-0.267261	-0.267261	-0.267261	-0.267261	-0.267261	-0.267261	3.74166	-0.267261	-0.267261	-0.267261	-0.267261	-0.267261	-0.267261
OG0010658	N	N	Y		0	0		NA	NA	NA	NA		NA	NA		0	0	0	0	0	0	0	0	0	12	0	0	0	0	0	0	0	0			-0.267261	-0.267261	-0.267261	-0.267261	-0.267261	-0.267261	-0.267261	-0.267261	-0.267261	3.74166	-0.267261	-0.267261	-0.267261	-0.267261
OG0010662	N	N	Y		0	0		NA	NA	NA	NA		NA	NA		0	0	0	0	0	0	0	0	0	12	0	0	0	0	0	0	0	0			-0.267261	-0.267261	-0.267261	-0.267261	-0.267261	-0.267261	-0.267261	-0.267261	-0.267261	3.74166	-0.267261	-0.267261	-0.267261	-0.267261
OG0010664	N	N	Y		0	0		NA	NA	NA	NA		NA	NA		0	0	0	0	0	0	0	0	0	12	0	0	0	0	0	0	0	0			-0.267261	-0.267261	-0.267261	-0.267261	-0.267261	-0.267261	-0.267261	-0.267261	-0.267261	3.74166	-0.267261	-0.267261	-0.267261	-0.267261
OG0010667	N	N	Y		0	0		NA	NA	NA	NA		NA	NA		0	0	0	0	0	0	0	0	0	12	0	0	0	0	0	0	0	0			-0.267261	-0.267261	-0.267261	-0.267261	-0.267261	-0.267261	-0.267261	-0.267261	-0.267261	3.74166	-0.267261	-0.267261	-0.267261	-0.267261
OG0010677	N	N	Y		0	0		NA	NA	NA	NA		NA	NA		0	0	0	0	0	0	0	0	0	1	0	0	0	0	0	0	11	0			-0.267261	-0.267261	-0.267261	-0.267261	-0.267261	-0.267261	-0.267261	-0.267261	-0.267261	3.74166	-0.267261	-0.267261	-0.267261	-0.267261
OG0010687	N	N	Y		0	0		NA	NA	NA	NA		NA	NA		0	0	0	0	0	0	0	0	12	0	0	0	0	0	0	0	0	0			-0.267261	-0.267261	-0.267261	-0.267261	-0.267261	-0.267261	-0.267261	-0.267261	3.74166	-0.267261	-0.267261	-0.267261	-0.267261	-0.267261
OG0010697	N	N	Y		0	0		NA	NA	NA	NA		NA	NA		0	0	0	0	0	0	0	0	0	0	12	0	0	0	0	0	0	0			-0.267261	-0.267261	-0.267261	-0.267261	-0.267261	-0.267261	-0.267261	-0.267261	-0.267261	-0.267261	3.74166	-0.267261	-0.267261	-0.267261
OG0010698	N	N	Y		0	0		NA	NA	NA	NA		NA	NA		0	0	0	0	0	0	0	0	0	0	12	0	0	0	0	0	0	0			-0.267261	-0.267261	-0.267261	-0.267261	-0.267261	-0.267261	-0.267261	-0.267261	-0.267261	-0.267261	3.74166	-0.267261	-0.267261	-0.267261
OG0010701	N	N	Y		0	0		NA	NA	NA	NA		NA	NA		0	12	0	0	0	0	0	0	0	0	0	0	0	0	0	0	0	0			-0.267261	3.74166	-0.267261	-0.267261	-0.267261	-0.267261	-0.267261	-0.267261	-0.267261	-0.267261	-0.267261	-0.267261	-0.267261	-0.267261
OG0010708	N	N	Y		0	0		NA	NA	NA	NA		NA	NA		0	0	0	0	0	1	0	0	0	0	0	0	0	0	0	0	0	11			-0.267261	-0.267261	-0.267261	-0.267261	-0.267261	3.74166	-0.267261	-0.267261	-0.267261	-0.267261	-0.267261	-0.267261	-0.267261	-0.267261
OG0010725	N	N	Y		0	0		NA	NA	NA	NA		NA	NA		12	0	0	0	0	0	0	0	0	0	0	0	0	0	0	0	0	0			3.74166	-0.267261	-0.267261	-0.267261	-0.267261	-0.267261	-0.267261	-0.267261	-0.267261	-0.267261	-0.267261	-0.267261	-0.267261	-0.267261
OG0010726	N	N	Y		0	0		NA	NA	NA	NA		NA	NA		0	0	0	0	0	0	0	0	0	0	0	0	0	0	6	0	0	6			-0.267261	-0.267261	-0.267261	-0.267261	-0.267261	-0.267261	-0.267261	-0.267261	-0.267261	-0.267261	-0.267261	-0.267261	-0.267261	-0.267261
OG0010789	N	N	Y		0	0		NA	NA	NA	NA		NA	NA		0	0	0	11	0	0	0	0	0	0	0	0	0	0	0	0	0	0			-0.267261	-0.267261	-0.267261	3.74166	-0.267261	-0.267261	-0.267261	-0.267261	-0.267261	-0.267261	-0.267261	-0.267261	-0.267261	-0.267261
OG0010822	N	N	Y		0	0		NA	NA	NA	NA		NA	NA		0	0	0	11	0	0	0	0	0	0	0	0	0	0	0	0	0	0			-0.267261	-0.267261	-0.267261	3.74166	-0.267261	-0.267261	-0.267261	-0.267261	-0.267261	-0.267261	-0.267261	-0.267261	-0.267261	-0.267261
OG0010930	N	N	Y		0	0		NA	NA	NA	NA		NA	NA		0	0	0	0	0	1	0	0	0	0	0	0	0	0	0	10	0	0			-0.267261	-0.267261	-0.267261	-0.267261	-0.267261	3.74166	-0.267261	-0.267261	-0.267261	-0.267261	-0.267261	-0.267261	-0.267261	-0.267261
OG0010937	N	N	Y		0	0		NA	NA	NA	NA		NA	NA		0	0	0	0	0	0	0	1	0	0	0	0	0	0	0	10	0	0			-0.267261	-0.267261	-0.267261	-0.267261	-0.267261	-0.267261	-0.267261	3.74166	-0.267261	-0.267261	-0.267261	-0.267261	-0.267261	-0.267261
OG0010940	N	N	Y		0	0		NA	NA	NA	NA		NA	NA		0	0	0	0	0	0	0	0	0	0	0	0	0	0	0	4	7	0			#NUM!	#NUM!	#NUM!	#NUM!	#NUM!	#NUM!	#NUM!	#NUM!	#NUM!	#NUM!	#NUM!	#NUM!	#NUM!	#NUM!
OG0010944	N	N	Y		0	0		NA	NA	NA	NA		NA	NA		0	0	0	0	0	0	0	0	1	0	0	0	0	0	0	3	7	0			-0.267261	-0.267261	-0.267261	-0.267261	-0.267261	-0.267261	-0.267261	-0.267261	3.74166	-0.267261	-0.267261	-0.267261	-0.267261	-0.267261
OG0010958	N	N	Y		0	0		NA	NA	NA	NA		NA	NA		0	0	0	0	0	0	0	0	0	9	0	0	0	0	0	2	0	0			-0.267261	-0.267261	-0.267261	-0.267261	-0.267261	-0.267261	-0.267261	-0.267261	-0.267261	3.74166	-0.267261	-0.267261	-0.267261	-0.267261
OG0010960	N	N	Y		0	0		NA	NA	NA	NA		NA	NA		0	0	0	0	0	0	3	0	0	0	0	0	0	0	0	8	0	0			-0.267261	-0.267261	-0.267261	-0.267261	-0.267261	-0.267261	3.74166	-0.267261	-0.267261	-0.267261	-0.267261	-0.267261	-0.267261	-0.267261
OG0010968	N	N	Y		0	0		NA	NA	NA	NA		NA	NA		0	0	0	0	0	0	0	0	10	0	0	0	0	0	0	1	0	0			-0.267261	-0.267261	-0.267261	-0.267261	-0.267261	-0.267261	-0.267261	-0.267261	3.74166	-0.267261	-0.267261	-0.267261	-0.267261	-0.267261
OG0010977	N	N	Y		0	0		NA	NA	NA	NA		NA	NA		0	0	0	0	0	0	0	0	10	0	0	0	0	0	0	1	0	0			-0.267261	-0.267261	-0.267261	-0.267261	-0.267261	-0.267261	-0.267261	-0.267261	3.74166	-0.267261	-0.267261	-0.267261	-0.267261	-0.267261
OG0010997	N	N	Y		0	0		NA	NA	NA	NA		NA	NA		0	0	11	0	0	0	0	0	0	0	0	0	0	0	0	0	0	0			-0.267261	-0.267261	3.74166	-0.267261	-0.267261	-0.267261	-0.267261	-0.267261	-0.267261	-0.267261	-0.267261	-0.267261	-0.267261	-0.267261
OG0011030	N	N	Y		0	0		NA	NA	NA	NA		NA	NA		0	0	0	0	0	0	0	0	0	7	0	0	0	0	0	0	0	4			-0.267261	-0.267261	-0.267261	-0.267261	-0.267261	-0.267261	-0.267261	-0.267261	-0.267261	3.74166	-0.267261	-0.267261	-0.267261	-0.267261
OG0011031	N	N	Y		0	0		NA	NA	NA	NA		NA	NA		0	0	0	0	0	0	0	0	0	4	0	0	0	0	0	0	7	0			-0.267261	-0.267261	-0.267261	-0.267261	-0.267261	-0.267261	-0.267261	-0.267261	-0.267261	3.74166	-0.267261	-0.267261	-0.267261	-0.267261
OG0011032	N	N	Y		0	0		NA	NA	NA	NA		NA	NA		0	0	0	0	0	0	0	0	0	11	0	0	0	0	0	0	0	0			-0.267261	-0.267261	-0.267261	-0.267261	-0.267261	-0.267261	-0.267261	-0.267261	-0.267261	3.74166	-0.267261	-0.267261	-0.267261	-0.267261
OG0011033	N	N	Y		0	0		NA	NA	NA	NA		NA	NA		0	0	0	0	0	0	0	0	0	11	0	0	0	0	0	0	0	0			-0.267261	-0.267261	-0.267261	-0.267261	-0.267261	-0.267261	-0.267261	-0.267261	-0.267261	3.74166	-0.267261	-0.267261	-0.267261	-0.267261
OG0011057	N	N	Y		0	0		NA	NA	NA	NA		NA	NA		0	0	0	0	0	0	0	0	10	0	0	0	0	0	0	0	1	0			-0.267261	-0.267261	-0.267261	-0.267261	-0.267261	-0.267261	-0.267261	-0.267261	3.74166	-0.267261	-0.267261	-0.267261	-0.267261	-0.267261
OG0011064	N	N	Y		0	0		NA	NA	NA	NA		NA	NA		0	0	0	0	0	0	0	0	11	0	0	0	0	0	0	0	0	0			-0.267261	-0.267261	-0.267261	-0.267261	-0.267261	-0.267261	-0.267261	-0.267261	3.74166	-0.267261	-0.267261	-0.267261	-0.267261	-0.267261
OG0011068	N	N	Y		0	0		NA	NA	NA	NA		NA	NA		0	0	0	0	0	0	0	0	0	0	11	0	0	0	0	0	0	0			-0.267261	-0.267261	-0.267261	-0.267261	-0.267261	-0.267261	-0.267261	-0.267261	-0.267261	-0.267261	3.74166	-0.267261	-0.267261	-0.267261
OG0011072	N	N	Y		0	0		NA	NA	NA	NA		NA	NA		0	11	0	0	0	0	0	0	0	0	0	0	0	0	0	0	0	0			-0.267261	3.74166	-0.267261	-0.267261	-0.267261	-0.267261	-0.267261	-0.267261	-0.267261	-0.267261	-0.267261	-0.267261	-0.267261	-0.267261
OG0011073	N	N	Y		0	0		NA	NA	NA	NA		NA	NA		0	11	0	0	0	0	0	0	0	0	0	0	0	0	0	0	0	0			-0.267261	3.74166	-0.267261	-0.267261	-0.267261	-0.267261	-0.267261	-0.267261	-0.267261	-0.267261	-0.267261	-0.267261	-0.267261	-0.267261
OG0011076	N	N	Y		0	0		NA	NA	NA	NA		NA	NA		0	0	0	0	0	6	0	0	0	0	0	0	0	0	0	0	0	5			-0.267261	-0.267261	-0.267261	-0.267261	-0.267261	3.74166	-0.267261	-0.267261	-0.267261	-0.267261	-0.267261	-0.267261	-0.267261	-0.267261
OG0011079	N	N	Y		0	0		NA	NA	NA	NA		NA	NA		0	0	0	0	0	5	0	0	0	0	0	0	0	0	0	0	1	5			-0.267261	-0.267261	-0.267261	-0.267261	-0.267261	3.74166	-0.267261	-0.267261	-0.267261	-0.267261	-0.267261	-0.267261	-0.267261	-0.267261
OG0011082	N	N	Y		0	0		NA	NA	NA	NA		NA	NA		0	0	0	0	0	0	0	0	0	0	0	0	0	0	0	0	11	0			#NUM!	#NUM!	#NUM!	#NUM!	#NUM!	#NUM!	#NUM!	#NUM!	#NUM!	#NUM!	#NUM!	#NUM!	#NUM!	#NUM!
OG0011083	N	N	Y		0	0		NA	NA	NA	NA		NA	NA		0	0	0	0	0	0	0	0	0	0	0	0	0	0	0	0	11	0			#NUM!	#NUM!	#NUM!	#NUM!	#NUM!	#NUM!	#NUM!	#NUM!	#NUM!	#NUM!	#NUM!	#NUM!	#NUM!	#NUM!
OG0011085	N	N	Y		0	0		NA	NA	NA	NA		NA	NA		0	0	0	0	11	0	0	0	0	0	0	0	0	0	0	0	0	0			-0.267261	-0.267261	-0.267261	-0.267261	3.74166	-0.267261	-0.267261	-0.267261	-0.267261	-0.267261	-0.267261	-0.267261	-0.267261	-0.267261
OG0011100	N	N	Y		0	0		NA	NA	NA	NA		NA	NA		11	0	0	0	0	0	0	0	0	0	0	0	0	0	0	0	0	0			3.74166	-0.267261	-0.267261	-0.267261	-0.267261	-0.267261	-0.267261	-0.267261	-0.267261	-0.267261	-0.267261	-0.267261	-0.267261	-0.267261
OG0011101	N	N	Y		0	0		NA	NA	NA	NA		NA	NA		11	0	0	0	0	0	0	0	0	0	0	0	0	0	0	0	0	0			3.74166	-0.267261	-0.267261	-0.267261	-0.267261	-0.267261	-0.267261	-0.267261	-0.267261	-0.267261	-0.267261	-0.267261	-0.267261	-0.267261
OG0011103	N	N	Y		0	0		NA	NA	NA	NA		NA	NA		0	0	0	0	0	0	0	0	0	0	0	0	0	0	0	0	0	11			#NUM!	#NUM!	#NUM!	#NUM!	#NUM!	#NUM!	#NUM!	#NUM!	#NUM!	#NUM!	#NUM!	#NUM!	#NUM!	#NUM!
OG0011104	N	N	Y		0	0		NA	NA	NA	NA		NA	NA		0	0	0	0	0	0	0	0	0	0	0	0	0	0	11	0	0	0			-0.267261	-0.267261	-0.267261	-0.267261	-0.267261	-0.267261	-0.267261	-0.267261	-0.267261	-0.267261	-0.267261	-0.267261	-0.267261	-0.267261
OG0011126	N	N	Y		0	0		NA	NA	NA	NA		NA	NA		0	0	0	0	0	0	0	0	0	0	0	0	10	0	0	0	0	0			-0.267261	-0.267261	-0.267261	-0.267261	-0.267261	-0.267261	-0.267261	-0.267261	-0.267261	-0.267261	-0.267261	-0.267261	3.74166	-0.267261
OG0011228	N	N	Y		0	0		NA	NA	NA	NA		NA	NA		0	0	0	10	0	0	0	0	0	0	0	0	0	0	0	0	0	0			-0.267261	-0.267261	-0.267261	3.74166	-0.267261	-0.267261	-0.267261	-0.267261	-0.267261	-0.267261	-0.267261	-0.267261	-0.267261	-0.267261
OG0011320	N	N	Y		0	0		NA	NA	NA	NA		NA	NA		0	0	0	0	0	0	0	0	0	0	3	0	0	0	0	7	0	0			-0.267261	-0.267261	-0.267261	-0.267261	-0.267261	-0.267261	-0.267261	-0.267261	-0.267261	-0.267261	3.74166	-0.267261	-0.267261	-0.267261
OG0011324	N	N	Y		0	0		NA	NA	NA	NA		NA	NA		0	0	0	0	0	0	0	1	0	0	0	0	0	0	0	9	0	0			-0.267261	-0.267261	-0.267261	-0.267261	-0.267261	-0.267261	-0.267261	3.74166	-0.267261	-0.267261	-0.267261	-0.267261	-0.267261	-0.267261
OG0011326	N	N	Y		0	0		NA	NA	NA	NA		NA	NA		0	0	0	0	0	0	0	1	0	0	0	0	0	0	0	6	3	0			-0.267261	-0.267261	-0.267261	-0.267261	-0.267261	-0.267261	-0.267261	3.74166	-0.267261	-0.267261	-0.267261	-0.267261	-0.267261	-0.267261
OG0011327	N	N	Y		0	0		NA	NA	NA	NA		NA	NA		0	0	0	0	0	0	0	1	0	0	0	0	0	0	0	9	0	0			-0.267261	-0.267261	-0.267261	-0.267261	-0.267261	-0.267261	-0.267261	3.74166	-0.267261	-0.267261	-0.267261	-0.267261	-0.267261	-0.267261
OG0011328	N	N	Y		0	0		NA	NA	NA	NA		NA	NA		0	0	0	0	0	0	0	0	0	0	0	0	0	0	0	9	1	0			#NUM!	#NUM!	#NUM!	#NUM!	#NUM!	#NUM!	#NUM!	#NUM!	#NUM!	#NUM!	#NUM!	#NUM!	#NUM!	#NUM!
OG0011331	N	N	Y		0	0		NA	NA	NA	NA		NA	NA		0	0	0	0	0	0	0	0	0	0	0	0	0	0	0	10	0	0			#NUM!	#NUM!	#NUM!	#NUM!	#NUM!	#NUM!	#NUM!	#NUM!	#NUM!	#NUM!	#NUM!	#NUM!	#NUM!	#NUM!
OG0011377	N	N	Y		0	0		NA	NA	NA	NA		NA	NA		0	0	10	0	0	0	0	0	0	0	0	0	0	0	0	0	0	0			-0.267261	-0.267261	3.74166	-0.267261	-0.267261	-0.267261	-0.267261	-0.267261	-0.267261	-0.267261	-0.267261	-0.267261	-0.267261	-0.267261
OG0011395	N	N	Y		0	0		NA	NA	NA	NA		NA	NA		0	0	0	0	0	0	0	0	0	0	0	10	0	0	0	0	0	0			-0.267261	-0.267261	-0.267261	-0.267261	-0.267261	-0.267261	-0.267261	-0.267261	-0.267261	-0.267261	-0.267261	3.74166	-0.267261	-0.267261
OG0011404	N	N	Y		0	0		NA	NA	NA	NA		NA	NA		0	0	0	0	0	0	0	0	0	7	0	0	0	0	0	0	3	0			-0.267261	-0.267261	-0.267261	-0.267261	-0.267261	-0.267261	-0.267261	-0.267261	-0.267261	3.74166	-0.267261	-0.267261	-0.267261	-0.267261
OG0011406	N	N	Y		0	0		NA	NA	NA	NA		NA	NA		0	0	0	0	0	0	0	0	0	6	0	0	0	0	0	0	4	0			-0.267261	-0.267261	-0.267261	-0.267261	-0.267261	-0.267261	-0.267261	-0.267261	-0.267261	3.74166	-0.267261	-0.267261	-0.267261	-0.267261
OG0011429	N	N	Y		0	0		NA	NA	NA	NA		NA	NA		0	0	0	0	0	0	0	0	10	0	0	0	0	0	0	0	0	0			-0.267261	-0.267261	-0.267261	-0.267261	-0.267261	-0.267261	-0.267261	-0.267261	3.74166	-0.267261	-0.267261	-0.267261	-0.267261	-0.267261
OG0011448	N	N	Y		0	0		NA	NA	NA	NA		NA	NA		0	0	0	0	0	0	0	0	0	0	10	0	0	0	0	0	0	0			-0.267261	-0.267261	-0.267261	-0.267261	-0.267261	-0.267261	-0.267261	-0.267261	-0.267261	-0.267261	3.74166	-0.267261	-0.267261	-0.267261
OG0011452	N	N	Y		0	0		NA	NA	NA	NA		NA	NA		0	10	0	0	0	0	0	0	0	0	0	0	0	0	0	0	0	0			-0.267261	3.74166	-0.267261	-0.267261	-0.267261	-0.267261	-0.267261	-0.267261	-0.267261	-0.267261	-0.267261	-0.267261	-0.267261	-0.267261
OG0011453	N	N	Y		0	0		NA	NA	NA	NA		NA	NA		0	10	0	0	0	0	0	0	0	0	0	0	0	0	0	0	0	0			-0.267261	3.74166	-0.267261	-0.267261	-0.267261	-0.267261	-0.267261	-0.267261	-0.267261	-0.267261	-0.267261	-0.267261	-0.267261	-0.267261
OG0011467	N	N	Y		0	0		NA	NA	NA	NA		NA	NA		0	0	0	0	0	0	0	4	0	0	0	0	0	0	0	0	6	0			-0.267261	-0.267261	-0.267261	-0.267261	-0.267261	-0.267261	-0.267261	3.74166	-0.267261	-0.267261	-0.267261	-0.267261	-0.267261	-0.267261
OG0011469	N	N	Y		0	0		NA	NA	NA	NA		NA	NA		0	0	0	0	0	0	0	0	0	0	0	0	0	0	0	0	2	8			#NUM!	#NUM!	#NUM!	#NUM!	#NUM!	#NUM!	#NUM!	#NUM!	#NUM!	#NUM!	#NUM!	#NUM!	#NUM!	#NUM!
OG0011487	N	N	Y		0	0		NA	NA	NA	NA		NA	NA		10	0	0	0	0	0	0	0	0	0	0	0	0	0	0	0	0	0			3.74166	-0.267261	-0.267261	-0.267261	-0.267261	-0.267261	-0.267261	-0.267261	-0.267261	-0.267261	-0.267261	-0.267261	-0.267261	-0.267261
OG0011488	N	N	Y		0	0		NA	NA	NA	NA		NA	NA		10	0	0	0	0	0	0	0	0	0	0	0	0	0	0	0	0	0			3.74166	-0.267261	-0.267261	-0.267261	-0.267261	-0.267261	-0.267261	-0.267261	-0.267261	-0.267261	-0.267261	-0.267261	-0.267261	-0.267261
OG0011490	N	N	Y		0	0		NA	NA	NA	NA		NA	NA		0	0	0	0	0	0	0	10	0	0	0	0	0	0	0	0	0	0			-0.267261	-0.267261	-0.267261	-0.267261	-0.267261	-0.267261	-0.267261	3.74166	-0.267261	-0.267261	-0.267261	-0.267261	-0.267261	-0.267261
OG0011499	N	N	Y		0	0		NA	NA	NA	NA		NA	NA		0	0	0	0	0	0	0	0	0	0	0	0	9	0	0	0	0	0			-0.267261	-0.267261	-0.267261	-0.267261	-0.267261	-0.267261	-0.267261	-0.267261	-0.267261	-0.267261	-0.267261	-0.267261	3.74166	-0.267261
OG0011500	N	N	Y		0	0		NA	NA	NA	NA		NA	NA		0	0	0	0	0	0	0	0	0	0	0	0	9	0	0	0	0	0			-0.267261	-0.267261	-0.267261	-0.267261	-0.267261	-0.267261	-0.267261	-0.267261	-0.267261	-0.267261	-0.267261	-0.267261	3.74166	-0.267261
OG0011564	N	N	Y		0	0		NA	NA	NA	NA		NA	NA		0	0	0	9	0	0	0	0	0	0	0	0	0	0	0	0	0	0			-0.267261	-0.267261	-0.267261	3.74166	-0.267261	-0.267261	-0.267261	-0.267261	-0.267261	-0.267261	-0.267261	-0.267261	-0.267261	-0.267261
OG0011576	N	N	Y		0	0		NA	NA	NA	NA		NA	NA		0	0	0	9	0	0	0	0	0	0	0	0	0	0	0	0	0	0			-0.267261	-0.267261	-0.267261	3.74166	-0.267261	-0.267261	-0.267261	-0.267261	-0.267261	-0.267261	-0.267261	-0.267261	-0.267261	-0.267261
OG0011706	N	N	Y		0	0		NA	NA	NA	NA		NA	NA		0	1	0	0	0	0	0	0	0	0	0	0	0	0	0	8	0	0			-0.267261	3.74166	-0.267261	-0.267261	-0.267261	-0.267261	-0.267261	-0.267261	-0.267261	-0.267261	-0.267261	-0.267261	-0.267261	-0.267261
OG0011711	N	N	Y		0	0		NA	NA	NA	NA		NA	NA		0	0	0	0	0	0	0	0	0	8	0	0	0	0	0	1	0	0			-0.267261	-0.267261	-0.267261	-0.267261	-0.267261	-0.267261	-0.267261	-0.267261	-0.267261	3.74166	-0.267261	-0.267261	-0.267261	-0.267261
OG0011712	N	N	Y		0	0		NA	NA	NA	NA		NA	NA		0	1	0	0	0	0	0	0	0	0	0	0	0	0	0	4	4	0			-0.267261	3.74166	-0.267261	-0.267261	-0.267261	-0.267261	-0.267261	-0.267261	-0.267261	-0.267261	-0.267261	-0.267261	-0.267261	-0.267261
OG0011733	N	N	Y		0	0		NA	NA	NA	NA		NA	NA		0	0	0	0	0	0	0	0	6	0	0	0	0	0	0	3	0	0			-0.267261	-0.267261	-0.267261	-0.267261	-0.267261	-0.267261	-0.267261	-0.267261	3.74166	-0.267261	-0.267261	-0.267261	-0.267261	-0.267261
OG0011747	N	N	Y		0	0		NA	NA	NA	NA		NA	NA		0	0	0	0	0	0	0	0	0	1	0	0	0	0	0	7	1	0			-0.267261	-0.267261	-0.267261	-0.267261	-0.267261	-0.267261	-0.267261	-0.267261	-0.267261	3.74166	-0.267261	-0.267261	-0.267261	-0.267261
OG0011763	N	N	Y		0	0		NA	NA	NA	NA		NA	NA		0	0	0	0	0	0	0	0	0	0	0	0	0	0	0	1	6	2			#NUM!	#NUM!	#NUM!	#NUM!	#NUM!	#NUM!	#NUM!	#NUM!	#NUM!	#NUM!	#NUM!	#NUM!	#NUM!	#NUM!
OG0011782	N	N	Y		0	0		NA	NA	NA	NA		NA	NA		0	0	9	0	0	0	0	0	0	0	0	0	0	0	0	0	0	0			-0.267261	-0.267261	3.74166	-0.267261	-0.267261	-0.267261	-0.267261	-0.267261	-0.267261	-0.267261	-0.267261	-0.267261	-0.267261	-0.267261
OG0011788	N	N	Y		0	0		NA	NA	NA	NA		NA	NA		0	0	9	0	0	0	0	0	0	0	0	0	0	0	0	0	0	0			-0.267261	-0.267261	3.74166	-0.267261	-0.267261	-0.267261	-0.267261	-0.267261	-0.267261	-0.267261	-0.267261	-0.267261	-0.267261	-0.267261
OG0011839	N	N	Y		0	0		NA	NA	NA	NA		NA	NA		0	0	0	0	0	0	0	0	0	9	0	0	0	0	0	0	0	0			-0.267261	-0.267261	-0.267261	-0.267261	-0.267261	-0.267261	-0.267261	-0.267261	-0.267261	3.74166	-0.267261	-0.267261	-0.267261	-0.267261
OG0011844	N	N	Y		0	0		NA	NA	NA	NA		NA	NA		0	0	0	0	0	0	0	0	0	7	0	0	0	0	0	0	2	0			-0.267261	-0.267261	-0.267261	-0.267261	-0.267261	-0.267261	-0.267261	-0.267261	-0.267261	3.74166	-0.267261	-0.267261	-0.267261	-0.267261
OG0011845	N	N	Y		0	0		NA	NA	NA	NA		NA	NA		0	0	0	0	0	0	0	0	0	9	0	0	0	0	0	0	0	0			-0.267261	-0.267261	-0.267261	-0.267261	-0.267261	-0.267261	-0.267261	-0.267261	-0.267261	3.74166	-0.267261	-0.267261	-0.267261	-0.267261
OG0011850	N	N	Y		0	0		NA	NA	NA	NA		NA	NA		0	0	0	0	0	0	0	0	0	9	0	0	0	0	0	0	0	0			-0.267261	-0.267261	-0.267261	-0.267261	-0.267261	-0.267261	-0.267261	-0.267261	-0.267261	3.74166	-0.267261	-0.267261	-0.267261	-0.267261
OG0011854	N	N	Y		0	0		NA	NA	NA	NA		NA	NA		0	0	0	0	0	0	0	0	0	9	0	0	0	0	0	0	0	0			-0.267261	-0.267261	-0.267261	-0.267261	-0.267261	-0.267261	-0.267261	-0.267261	-0.267261	3.74166	-0.267261	-0.267261	-0.267261	-0.267261
OG0011855	N	N	Y		0	0		NA	NA	NA	NA		NA	NA		0	0	0	0	0	0	0	0	0	9	0	0	0	0	0	0	0	0			-0.267261	-0.267261	-0.267261	-0.267261	-0.267261	-0.267261	-0.267261	-0.267261	-0.267261	3.74166	-0.267261	-0.267261	-0.267261	-0.267261
OG0011860	N	N	Y		0	0		NA	NA	NA	NA		NA	NA		0	0	0	0	0	0	0	0	0	1	0	0	0	0	0	0	8	0			-0.267261	-0.267261	-0.267261	-0.267261	-0.267261	-0.267261	-0.267261	-0.267261	-0.267261	3.74166	-0.267261	-0.267261	-0.267261	-0.267261
OG0011865	N	N	Y		0	0		NA	NA	NA	NA		NA	NA		0	0	0	0	0	0	0	0	0	2	0	0	0	0	0	0	7	0			-0.267261	-0.267261	-0.267261	-0.267261	-0.267261	-0.267261	-0.267261	-0.267261	-0.267261	3.74166	-0.267261	-0.267261	-0.267261	-0.267261
OG0011871	N	N	Y		0	0		NA	NA	NA	NA		NA	NA		0	0	0	0	0	0	0	0	9	0	0	0	0	0	0	0	0	0			-0.267261	-0.267261	-0.267261	-0.267261	-0.267261	-0.267261	-0.267261	-0.267261	3.74166	-0.267261	-0.267261	-0.267261	-0.267261	-0.267261
OG0011872	N	N	Y		0	0		NA	NA	NA	NA		NA	NA		0	0	0	0	0	0	0	0	9	0	0	0	0	0	0	0	0	0			-0.267261	-0.267261	-0.267261	-0.267261	-0.267261	-0.267261	-0.267261	-0.267261	3.74166	-0.267261	-0.267261	-0.267261	-0.267261	-0.267261
OG0011889	N	N	Y		0	0		NA	NA	NA	NA		NA	NA		0	0	0	0	0	0	0	0	3	0	0	0	0	0	0	0	6	0			-0.267261	-0.267261	-0.267261	-0.267261	-0.267261	-0.267261	-0.267261	-0.267261	3.74166	-0.267261	-0.267261	-0.267261	-0.267261	-0.267261
OG0011900	N	N	Y		0	0		NA	NA	NA	NA		NA	NA		0	9	0	0	0	0	0	0	0	0	0	0	0	0	0	0	0	0			-0.267261	3.74166	-0.267261	-0.267261	-0.267261	-0.267261	-0.267261	-0.267261	-0.267261	-0.267261	-0.267261	-0.267261	-0.267261	-0.267261
OG0011910	N	N	Y		0	0		NA	NA	NA	NA		NA	NA		0	1	0	0	0	0	0	0	0	0	0	0	0	0	0	0	8	0			-0.267261	3.74166	-0.267261	-0.267261	-0.267261	-0.267261	-0.267261	-0.267261	-0.267261	-0.267261	-0.267261	-0.267261	-0.267261	-0.267261
OG0011913	N	N	Y		0	0		NA	NA	NA	NA		NA	NA		0	0	0	0	0	9	0	0	0	0	0	0	0	0	0	0	0	0			-0.267261	-0.267261	-0.267261	-0.267261	-0.267261	3.74166	-0.267261	-0.267261	-0.267261	-0.267261	-0.267261	-0.267261	-0.267261	-0.267261
OG0011915	N	N	Y		0	0		NA	NA	NA	NA		NA	NA		0	0	0	0	0	9	0	0	0	0	0	0	0	0	0	0	0	0			-0.267261	-0.267261	-0.267261	-0.267261	-0.267261	3.74166	-0.267261	-0.267261	-0.267261	-0.267261	-0.267261	-0.267261	-0.267261	-0.267261
OG0011919	N	N	Y		0	0		NA	NA	NA	NA		NA	NA		0	0	0	0	0	9	0	0	0	0	0	0	0	0	0	0	0	0			-0.267261	-0.267261	-0.267261	-0.267261	-0.267261	3.74166	-0.267261	-0.267261	-0.267261	-0.267261	-0.267261	-0.267261	-0.267261	-0.267261
OG0011920	N	N	Y		0	0		NA	NA	NA	NA		NA	NA		0	0	0	0	0	9	0	0	0	0	0	0	0	0	0	0	0	0			-0.267261	-0.267261	-0.267261	-0.267261	-0.267261	3.74166	-0.267261	-0.267261	-0.267261	-0.267261	-0.267261	-0.267261	-0.267261	-0.267261
OG0011922	N	N	Y		0	0		NA	NA	NA	NA		NA	NA		0	0	0	0	0	0	0	0	0	0	0	0	0	0	0	0	9	0			#NUM!	#NUM!	#NUM!	#NUM!	#NUM!	#NUM!	#NUM!	#NUM!	#NUM!	#NUM!	#NUM!	#NUM!	#NUM!	#NUM!
OG0011923	N	N	Y		0	0		NA	NA	NA	NA		NA	NA		0	0	0	0	0	0	0	0	0	0	0	0	0	0	0	0	9	0			#NUM!	#NUM!	#NUM!	#NUM!	#NUM!	#NUM!	#NUM!	#NUM!	#NUM!	#NUM!	#NUM!	#NUM!	#NUM!	#NUM!
OG0011924	N	N	Y		0	0		NA	NA	NA	NA		NA	NA		0	0	0	0	0	0	0	0	0	0	0	0	0	0	0	0	9	0			#NUM!	#NUM!	#NUM!	#NUM!	#NUM!	#NUM!	#NUM!	#NUM!	#NUM!	#NUM!	#NUM!	#NUM!	#NUM!	#NUM!
OG0011940	N	N	Y		0	0		NA	NA	NA	NA		NA	NA		9	0	0	0	0	0	0	0	0	0	0	0	0	0	0	0	0	0			3.74166	-0.267261	-0.267261	-0.267261	-0.267261	-0.267261	-0.267261	-0.267261	-0.267261	-0.267261	-0.267261	-0.267261	-0.267261	-0.267261
OG0011941	N	N	Y		0	0		NA	NA	NA	NA		NA	NA		9	0	0	0	0	0	0	0	0	0	0	0	0	0	0	0	0	0			3.74166	-0.267261	-0.267261	-0.267261	-0.267261	-0.267261	-0.267261	-0.267261	-0.267261	-0.267261	-0.267261	-0.267261	-0.267261	-0.267261
OG0011942	N	N	Y		0	0		NA	NA	NA	NA		NA	NA		9	0	0	0	0	0	0	0	0	0	0	0	0	0	0	0	0	0			3.74166	-0.267261	-0.267261	-0.267261	-0.267261	-0.267261	-0.267261	-0.267261	-0.267261	-0.267261	-0.267261	-0.267261	-0.267261	-0.267261
OG0011943	N	N	Y		0	0		NA	NA	NA	NA		NA	NA		9	0	0	0	0	0	0	0	0	0	0	0	0	0	0	0	0	0			3.74166	-0.267261	-0.267261	-0.267261	-0.267261	-0.267261	-0.267261	-0.267261	-0.267261	-0.267261	-0.267261	-0.267261	-0.267261	-0.267261
OG0011944	N	N	Y		0	0		NA	NA	NA	NA		NA	NA		9	0	0	0	0	0	0	0	0	0	0	0	0	0	0	0	0	0			3.74166	-0.267261	-0.267261	-0.267261	-0.267261	-0.267261	-0.267261	-0.267261	-0.267261	-0.267261	-0.267261	-0.267261	-0.267261	-0.267261
OG0011945	N	N	Y		0	0		NA	NA	NA	NA		NA	NA		9	0	0	0	0	0	0	0	0	0	0	0	0	0	0	0	0	0			3.74166	-0.267261	-0.267261	-0.267261	-0.267261	-0.267261	-0.267261	-0.267261	-0.267261	-0.267261	-0.267261	-0.267261	-0.267261	-0.267261
OG0011946	N	N	Y		0	0		NA	NA	NA	NA		NA	NA		0	0	0	0	0	0	0	0	0	0	0	0	0	0	1	0	0	8			-0.267261	-0.267261	-0.267261	-0.267261	-0.267261	-0.267261	-0.267261	-0.267261	-0.267261	-0.267261	-0.267261	-0.267261	-0.267261	-0.267261
OG0011947	N	N	Y		0	0		NA	NA	NA	NA		NA	NA		0	0	0	0	0	0	0	0	0	0	0	0	0	0	0	0	0	9			#NUM!	#NUM!	#NUM!	#NUM!	#NUM!	#NUM!	#NUM!	#NUM!	#NUM!	#NUM!	#NUM!	#NUM!	#NUM!	#NUM!
OG0011948	N	N	Y		0	0		NA	NA	NA	NA		NA	NA		0	0	0	0	0	0	0	0	0	0	0	0	0	0	0	0	0	9			#NUM!	#NUM!	#NUM!	#NUM!	#NUM!	#NUM!	#NUM!	#NUM!	#NUM!	#NUM!	#NUM!	#NUM!	#NUM!	#NUM!
OG0011949	N	N	Y		0	0		NA	NA	NA	NA		NA	NA		0	0	0	0	0	0	0	0	0	0	0	0	0	0	0	0	0	9			#NUM!	#NUM!	#NUM!	#NUM!	#NUM!	#NUM!	#NUM!	#NUM!	#NUM!	#NUM!	#NUM!	#NUM!	#NUM!	#NUM!
OG0011950	N	N	Y		0	0		NA	NA	NA	NA		NA	NA		0	0	0	0	0	0	0	0	0	0	0	0	0	0	4	0	0	5			-0.267261	-0.267261	-0.267261	-0.267261	-0.267261	-0.267261	-0.267261	-0.267261	-0.267261	-0.267261	-0.267261	-0.267261	-0.267261	-0.267261
OG0011951	N	N	Y		0	0		NA	NA	NA	NA		NA	NA		0	0	0	0	0	0	0	0	0	0	0	0	0	0	9	0	0	0			-0.267261	-0.267261	-0.267261	-0.267261	-0.267261	-0.267261	-0.267261	-0.267261	-0.267261	-0.267261	-0.267261	-0.267261	-0.267261	-0.267261
OG0011952	N	N	Y		0	0		NA	NA	NA	NA		NA	NA		0	0	0	0	0	0	0	0	0	0	0	0	0	0	9	0	0	0			-0.267261	-0.267261	-0.267261	-0.267261	-0.267261	-0.267261	-0.267261	-0.267261	-0.267261	-0.267261	-0.267261	-0.267261	-0.267261	-0.267261
OG0011953	N	N	Y		0	0		NA	NA	NA	NA		NA	NA		0	0	0	0	0	0	0	9	0	0	0	0	0	0	0	0	0	0			-0.267261	-0.267261	-0.267261	-0.267261	-0.267261	-0.267261	-0.267261	3.74166	-0.267261	-0.267261	-0.267261	-0.267261	-0.267261	-0.267261
OG0011961	N	N	Y		0	0		NA	NA	NA	NA		NA	NA		0	0	0	0	0	0	0	0	0	0	0	0	8	0	0	0	0	0			-0.267261	-0.267261	-0.267261	-0.267261	-0.267261	-0.267261	-0.267261	-0.267261	-0.267261	-0.267261	-0.267261	-0.267261	3.74166	-0.267261
OG0011970	N	N	Y		0	0		NA	NA	NA	NA		NA	NA		0	0	0	0	0	0	0	0	0	0	0	0	8	0	0	0	0	0			-0.267261	-0.267261	-0.267261	-0.267261	-0.267261	-0.267261	-0.267261	-0.267261	-0.267261	-0.267261	-0.267261	-0.267261	3.74166	-0.267261
OG0011981	N	N	Y		0	0		NA	NA	NA	NA		NA	NA		0	0	0	0	0	0	0	0	0	0	0	0	8	0	0	0	0	0			-0.267261	-0.267261	-0.267261	-0.267261	-0.267261	-0.267261	-0.267261	-0.267261	-0.267261	-0.267261	-0.267261	-0.267261	3.74166	-0.267261
OG0012144	N	N	Y		0	0		NA	NA	NA	NA		NA	NA		0	0	0	8	0	0	0	0	0	0	0	0	0	0	0	0	0	0			-0.267261	-0.267261	-0.267261	3.74166	-0.267261	-0.267261	-0.267261	-0.267261	-0.267261	-0.267261	-0.267261	-0.267261	-0.267261	-0.267261
OG0012199	N	N	Y		0	0		NA	NA	NA	NA		NA	NA		0	0	0	0	0	0	0	0	0	0	0	0	0	0	0	8	0	0			#NUM!	#NUM!	#NUM!	#NUM!	#NUM!	#NUM!	#NUM!	#NUM!	#NUM!	#NUM!	#NUM!	#NUM!	#NUM!	#NUM!
OG0012200	N	N	Y		0	0		NA	NA	NA	NA		NA	NA		0	0	0	0	0	0	0	0	0	0	0	0	0	0	0	6	0	2			#NUM!	#NUM!	#NUM!	#NUM!	#NUM!	#NUM!	#NUM!	#NUM!	#NUM!	#NUM!	#NUM!	#NUM!	#NUM!	#NUM!
OG0012204	N	N	Y		0	0		NA	NA	NA	NA		NA	NA		0	0	0	0	0	0	0	1	0	0	0	0	0	0	0	7	0	0			-0.267261	-0.267261	-0.267261	-0.267261	-0.267261	-0.267261	-0.267261	3.74166	-0.267261	-0.267261	-0.267261	-0.267261	-0.267261	-0.267261
OG0012207	N	N	Y		0	0		NA	NA	NA	NA		NA	NA		0	0	0	0	0	0	0	0	0	1	0	0	0	0	0	6	1	0			-0.267261	-0.267261	-0.267261	-0.267261	-0.267261	-0.267261	-0.267261	-0.267261	-0.267261	3.74166	-0.267261	-0.267261	-0.267261	-0.267261
OG0012208	N	N	Y		0	0		NA	NA	NA	NA		NA	NA		0	0	0	0	0	0	0	0	0	0	0	0	0	0	0	4	2	2			#NUM!	#NUM!	#NUM!	#NUM!	#NUM!	#NUM!	#NUM!	#NUM!	#NUM!	#NUM!	#NUM!	#NUM!	#NUM!	#NUM!
OG0012211	N	N	Y		0	0		NA	NA	NA	NA		NA	NA		7	0	0	0	0	0	0	0	0	0	0	0	0	0	0	1	0	0			3.74166	-0.267261	-0.267261	-0.267261	-0.267261	-0.267261	-0.267261	-0.267261	-0.267261	-0.267261	-0.267261	-0.267261	-0.267261	-0.267261
OG0012212	N	N	Y		0	0		NA	NA	NA	NA		NA	NA		0	0	0	0	0	0	0	1	0	0	0	0	0	0	0	7	0	0			-0.267261	-0.267261	-0.267261	-0.267261	-0.267261	-0.267261	-0.267261	3.74166	-0.267261	-0.267261	-0.267261	-0.267261	-0.267261	-0.267261
OG0012214	N	N	Y		0	0		NA	NA	NA	NA		NA	NA		0	1	0	0	0	0	0	0	0	0	0	0	0	0	0	7	0	0			-0.267261	3.74166	-0.267261	-0.267261	-0.267261	-0.267261	-0.267261	-0.267261	-0.267261	-0.267261	-0.267261	-0.267261	-0.267261	-0.267261
OG0012229	N	N	Y		0	0		NA	NA	NA	NA		NA	NA		0	0	0	0	5	0	0	0	0	0	0	0	0	0	0	3	0	0			-0.267261	-0.267261	-0.267261	-0.267261	3.74166	-0.267261	-0.267261	-0.267261	-0.267261	-0.267261	-0.267261	-0.267261	-0.267261	-0.267261
OG0012232	N	N	Y		0	0		NA	NA	NA	NA		NA	NA		0	0	1	0	0	0	0	0	0	0	0	0	0	0	0	1	6	0			-0.267261	-0.267261	3.74166	-0.267261	-0.267261	-0.267261	-0.267261	-0.267261	-0.267261	-0.267261	-0.267261	-0.267261	-0.267261	-0.267261
OG0012236	N	N	Y		0	0		NA	NA	NA	NA		NA	NA		0	0	7	0	0	0	0	0	0	0	0	0	0	0	0	1	0	0			-0.267261	-0.267261	3.74166	-0.267261	-0.267261	-0.267261	-0.267261	-0.267261	-0.267261	-0.267261	-0.267261	-0.267261	-0.267261	-0.267261
OG0012257	N	N	Y		0	0		NA	NA	NA	NA		NA	NA		0	0	0	0	0	5	0	0	0	0	0	0	0	0	0	3	0	0			-0.267261	-0.267261	-0.267261	-0.267261	-0.267261	3.74166	-0.267261	-0.267261	-0.267261	-0.267261	-0.267261	-0.267261	-0.267261	-0.267261
OG0012263	N	N	Y		0	0		NA	NA	NA	NA		NA	NA		0	7	0	0	0	0	0	0	0	0	0	0	0	0	0	1	0	0			-0.267261	3.74166	-0.267261	-0.267261	-0.267261	-0.267261	-0.267261	-0.267261	-0.267261	-0.267261	-0.267261	-0.267261	-0.267261	-0.267261
OG0012284	N	N	Y		0	0		NA	NA	NA	NA		NA	NA		0	0	0	0	0	0	0	0	0	0	7	0	0	0	0	1	0	0			-0.267261	-0.267261	-0.267261	-0.267261	-0.267261	-0.267261	-0.267261	-0.267261	-0.267261	-0.267261	3.74166	-0.267261	-0.267261	-0.267261
OG0012290	N	N	Y		0	0		NA	NA	NA	NA		NA	NA		0	0	0	0	0	0	0	0	0	5	0	0	0	0	0	1	2	0			-0.267261	-0.267261	-0.267261	-0.267261	-0.267261	-0.267261	-0.267261	-0.267261	-0.267261	3.74166	-0.267261	-0.267261	-0.267261	-0.267261
OG0012304	N	N	Y		0	0		NA	NA	NA	NA		NA	NA		0	0	8	0	0	0	0	0	0	0	0	0	0	0	0	0	0	0			-0.267261	-0.267261	3.74166	-0.267261	-0.267261	-0.267261	-0.267261	-0.267261	-0.267261	-0.267261	-0.267261	-0.267261	-0.267261	-0.267261
OG0012339	N	N	Y		0	0		NA	NA	NA	NA		NA	NA		0	0	0	0	0	0	0	0	0	0	0	8	0	0	0	0	0	0			-0.267261	-0.267261	-0.267261	-0.267261	-0.267261	-0.267261	-0.267261	-0.267261	-0.267261	-0.267261	-0.267261	3.74166	-0.267261	-0.267261
OG0012341	N	N	Y		0	0		NA	NA	NA	NA		NA	NA		0	0	0	0	0	0	0	0	0	0	0	8	0	0	0	0	0	0			-0.267261	-0.267261	-0.267261	-0.267261	-0.267261	-0.267261	-0.267261	-0.267261	-0.267261	-0.267261	-0.267261	3.74166	-0.267261	-0.267261
OG0012345	N	N	Y		0	0		NA	NA	NA	NA		NA	NA		0	0	0	0	0	0	0	0	0	0	0	8	0	0	0	0	0	0			-0.267261	-0.267261	-0.267261	-0.267261	-0.267261	-0.267261	-0.267261	-0.267261	-0.267261	-0.267261	-0.267261	3.74166	-0.267261	-0.267261
OG0012357	N	N	Y		0	0		NA	NA	NA	NA		NA	NA		0	0	0	0	0	0	0	0	0	8	0	0	0	0	0	0	0	0			-0.267261	-0.267261	-0.267261	-0.267261	-0.267261	-0.267261	-0.267261	-0.267261	-0.267261	3.74166	-0.267261	-0.267261	-0.267261	-0.267261
OG0012371	N	N	Y		0	0		NA	NA	NA	NA		NA	NA		0	0	0	0	0	0	0	0	0	8	0	0	0	0	0	0	0	0			-0.267261	-0.267261	-0.267261	-0.267261	-0.267261	-0.267261	-0.267261	-0.267261	-0.267261	3.74166	-0.267261	-0.267261	-0.267261	-0.267261
OG0012385	N	N	Y		0	0		NA	NA	NA	NA		NA	NA		0	0	0	0	0	0	0	0	0	8	0	0	0	0	0	0	0	0			-0.267261	-0.267261	-0.267261	-0.267261	-0.267261	-0.267261	-0.267261	-0.267261	-0.267261	3.74166	-0.267261	-0.267261	-0.267261	-0.267261
OG0012397	N	N	Y		0	0		NA	NA	NA	NA		NA	NA		0	0	0	0	0	0	0	0	7	0	0	0	0	0	0	0	1	0			-0.267261	-0.267261	-0.267261	-0.267261	-0.267261	-0.267261	-0.267261	-0.267261	3.74166	-0.267261	-0.267261	-0.267261	-0.267261	-0.267261
OG0012407	N	N	Y		0	0		NA	NA	NA	NA		NA	NA		0	0	0	0	0	0	0	0	8	0	0	0	0	0	0	0	0	0			-0.267261	-0.267261	-0.267261	-0.267261	-0.267261	-0.267261	-0.267261	-0.267261	3.74166	-0.267261	-0.267261	-0.267261	-0.267261	-0.267261
OG0012419	N	N	Y		0	0		NA	NA	NA	NA		NA	NA		0	0	0	0	0	0	0	0	5	0	0	0	0	0	0	0	1	2			-0.267261	-0.267261	-0.267261	-0.267261	-0.267261	-0.267261	-0.267261	-0.267261	3.74166	-0.267261	-0.267261	-0.267261	-0.267261	-0.267261
OG0012424	N	N	Y		0	0		NA	NA	NA	NA		NA	NA		0	0	0	0	0	0	0	0	0	0	8	0	0	0	0	0	0	0			-0.267261	-0.267261	-0.267261	-0.267261	-0.267261	-0.267261	-0.267261	-0.267261	-0.267261	-0.267261	3.74166	-0.267261	-0.267261	-0.267261
OG0012425	N	N	Y		0	0		NA	NA	NA	NA		NA	NA		0	0	0	0	0	0	0	0	0	0	8	0	0	0	0	0	0	0			-0.267261	-0.267261	-0.267261	-0.267261	-0.267261	-0.267261	-0.267261	-0.267261	-0.267261	-0.267261	3.74166	-0.267261	-0.267261	-0.267261
OG0012427	N	N	Y		0	0		NA	NA	NA	NA		NA	NA		0	0	0	0	0	0	0	0	0	0	8	0	0	0	0	0	0	0			-0.267261	-0.267261	-0.267261	-0.267261	-0.267261	-0.267261	-0.267261	-0.267261	-0.267261	-0.267261	3.74166	-0.267261	-0.267261	-0.267261
OG0012428	N	N	Y		0	0		NA	NA	NA	NA		NA	NA		0	0	0	0	0	0	0	0	0	0	8	0	0	0	0	0	0	0			-0.267261	-0.267261	-0.267261	-0.267261	-0.267261	-0.267261	-0.267261	-0.267261	-0.267261	-0.267261	3.74166	-0.267261	-0.267261	-0.267261
OG0012430	N	N	Y		0	0		NA	NA	NA	NA		NA	NA		0	0	0	0	0	0	0	0	0	0	8	0	0	0	0	0	0	0			-0.267261	-0.267261	-0.267261	-0.267261	-0.267261	-0.267261	-0.267261	-0.267261	-0.267261	-0.267261	3.74166	-0.267261	-0.267261	-0.267261
OG0012431	N	N	Y		0	0		NA	NA	NA	NA		NA	NA		0	0	0	0	0	0	0	0	0	0	8	0	0	0	0	0	0	0			-0.267261	-0.267261	-0.267261	-0.267261	-0.267261	-0.267261	-0.267261	-0.267261	-0.267261	-0.267261	3.74166	-0.267261	-0.267261	-0.267261
OG0012440	N	N	Y		0	0		NA	NA	NA	NA		NA	NA		0	8	0	0	0	0	0	0	0	0	0	0	0	0	0	0	0	0			-0.267261	3.74166	-0.267261	-0.267261	-0.267261	-0.267261	-0.267261	-0.267261	-0.267261	-0.267261	-0.267261	-0.267261	-0.267261	-0.267261
OG0012442	N	N	Y		0	0		NA	NA	NA	NA		NA	NA		0	8	0	0	0	0	0	0	0	0	0	0	0	0	0	0	0	0			-0.267261	3.74166	-0.267261	-0.267261	-0.267261	-0.267261	-0.267261	-0.267261	-0.267261	-0.267261	-0.267261	-0.267261	-0.267261	-0.267261
OG0012457	N	N	Y		0	0		NA	NA	NA	NA		NA	NA		0	1	0	0	0	0	0	0	0	0	0	0	0	0	0	0	4	3			-0.267261	3.74166	-0.267261	-0.267261	-0.267261	-0.267261	-0.267261	-0.267261	-0.267261	-0.267261	-0.267261	-0.267261	-0.267261	-0.267261
OG0012460	N	N	Y		0	0		NA	NA	NA	NA		NA	NA		0	0	0	0	0	8	0	0	0	0	0	0	0	0	0	0	0	0			-0.267261	-0.267261	-0.267261	-0.267261	-0.267261	3.74166	-0.267261	-0.267261	-0.267261	-0.267261	-0.267261	-0.267261	-0.267261	-0.267261
OG0012466	N	N	Y		0	0		NA	NA	NA	NA		NA	NA		0	0	0	0	0	8	0	0	0	0	0	0	0	0	0	0	0	0			-0.267261	-0.267261	-0.267261	-0.267261	-0.267261	3.74166	-0.267261	-0.267261	-0.267261	-0.267261	-0.267261	-0.267261	-0.267261	-0.267261
OG0012471	N	N	Y		0	0		NA	NA	NA	NA		NA	NA		0	0	0	0	0	1	0	0	0	0	0	0	0	0	0	0	7	0			-0.267261	-0.267261	-0.267261	-0.267261	-0.267261	3.74166	-0.267261	-0.267261	-0.267261	-0.267261	-0.267261	-0.267261	-0.267261	-0.267261
OG0012473	N	N	Y		0	0		NA	NA	NA	NA		NA	NA		0	0	0	0	0	8	0	0	0	0	0	0	0	0	0	0	0	0			-0.267261	-0.267261	-0.267261	-0.267261	-0.267261	3.74166	-0.267261	-0.267261	-0.267261	-0.267261	-0.267261	-0.267261	-0.267261	-0.267261
OG0012474	N	N	Y		0	0		NA	NA	NA	NA		NA	NA		0	0	0	0	0	0	0	0	0	0	0	0	0	0	0	0	8	0			#NUM!	#NUM!	#NUM!	#NUM!	#NUM!	#NUM!	#NUM!	#NUM!	#NUM!	#NUM!	#NUM!	#NUM!	#NUM!	#NUM!
OG0012475	N	N	Y		0	0		NA	NA	NA	NA		NA	NA		0	0	0	0	0	0	0	0	0	0	0	0	0	0	0	0	8	0			#NUM!	#NUM!	#NUM!	#NUM!	#NUM!	#NUM!	#NUM!	#NUM!	#NUM!	#NUM!	#NUM!	#NUM!	#NUM!	#NUM!
OG0012477	N	N	Y		0	0		NA	NA	NA	NA		NA	NA		0	0	0	0	0	0	0	5	0	0	0	0	0	0	0	0	3	0			-0.267261	-0.267261	-0.267261	-0.267261	-0.267261	-0.267261	-0.267261	3.74166	-0.267261	-0.267261	-0.267261	-0.267261	-0.267261	-0.267261
OG0012478	N	N	Y		0	0		NA	NA	NA	NA		NA	NA		0	0	0	0	8	0	0	0	0	0	0	0	0	0	0	0	0	0			-0.267261	-0.267261	-0.267261	-0.267261	3.74166	-0.267261	-0.267261	-0.267261	-0.267261	-0.267261	-0.267261	-0.267261	-0.267261	-0.267261
OG0012517	N	N	Y		0	0		NA	NA	NA	NA		NA	NA		0	0	0	0	0	0	8	0	0	0	0	0	0	0	0	0	0	0			-0.267261	-0.267261	-0.267261	-0.267261	-0.267261	-0.267261	3.74166	-0.267261	-0.267261	-0.267261	-0.267261	-0.267261	-0.267261	-0.267261
OG0012518	N	N	Y		0	0		NA	NA	NA	NA		NA	NA		0	0	0	0	0	0	8	0	0	0	0	0	0	0	0	0	0	0			-0.267261	-0.267261	-0.267261	-0.267261	-0.267261	-0.267261	3.74166	-0.267261	-0.267261	-0.267261	-0.267261	-0.267261	-0.267261	-0.267261
OG0012519	N	N	Y		0	0		NA	NA	NA	NA		NA	NA		0	0	0	0	0	0	8	0	0	0	0	0	0	0	0	0	0	0			-0.267261	-0.267261	-0.267261	-0.267261	-0.267261	-0.267261	3.74166	-0.267261	-0.267261	-0.267261	-0.267261	-0.267261	-0.267261	-0.267261
OG0012520	N	N	Y		0	0		NA	NA	NA	NA		NA	NA		0	0	0	0	0	0	8	0	0	0	0	0	0	0	0	0	0	0			-0.267261	-0.267261	-0.267261	-0.267261	-0.267261	-0.267261	3.74166	-0.267261	-0.267261	-0.267261	-0.267261	-0.267261	-0.267261	-0.267261
OG0012521	N	N	Y		0	0		NA	NA	NA	NA		NA	NA		0	0	0	0	0	0	8	0	0	0	0	0	0	0	0	0	0	0			-0.267261	-0.267261	-0.267261	-0.267261	-0.267261	-0.267261	3.74166	-0.267261	-0.267261	-0.267261	-0.267261	-0.267261	-0.267261	-0.267261
OG0012522	N	N	Y		0	0		NA	NA	NA	NA		NA	NA		8	0	0	0	0	0	0	0	0	0	0	0	0	0	0	0	0	0			3.74166	-0.267261	-0.267261	-0.267261	-0.267261	-0.267261	-0.267261	-0.267261	-0.267261	-0.267261	-0.267261	-0.267261	-0.267261	-0.267261
OG0012523	N	N	Y		0	0		NA	NA	NA	NA		NA	NA		8	0	0	0	0	0	0	0	0	0	0	0	0	0	0	0	0	0			3.74166	-0.267261	-0.267261	-0.267261	-0.267261	-0.267261	-0.267261	-0.267261	-0.267261	-0.267261	-0.267261	-0.267261	-0.267261	-0.267261
OG0012524	N	N	Y		0	0		NA	NA	NA	NA		NA	NA		0	0	0	0	0	0	0	0	0	0	0	0	0	0	0	0	0	8			#NUM!	#NUM!	#NUM!	#NUM!	#NUM!	#NUM!	#NUM!	#NUM!	#NUM!	#NUM!	#NUM!	#NUM!	#NUM!	#NUM!
OG0012525	N	N	Y		0	0		NA	NA	NA	NA		NA	NA		0	0	0	0	0	0	0	0	0	0	0	0	0	0	0	0	0	8			#NUM!	#NUM!	#NUM!	#NUM!	#NUM!	#NUM!	#NUM!	#NUM!	#NUM!	#NUM!	#NUM!	#NUM!	#NUM!	#NUM!
OG0012526	N	N	Y		0	0		NA	NA	NA	NA		NA	NA		0	0	0	0	0	0	0	0	0	0	0	0	0	0	0	0	0	8			#NUM!	#NUM!	#NUM!	#NUM!	#NUM!	#NUM!	#NUM!	#NUM!	#NUM!	#NUM!	#NUM!	#NUM!	#NUM!	#NUM!
OG0012527	N	N	Y		0	0		NA	NA	NA	NA		NA	NA		0	0	0	0	0	0	0	0	0	0	0	0	0	0	0	0	0	8			#NUM!	#NUM!	#NUM!	#NUM!	#NUM!	#NUM!	#NUM!	#NUM!	#NUM!	#NUM!	#NUM!	#NUM!	#NUM!	#NUM!
OG0012528	N	N	Y		0	0		NA	NA	NA	NA		NA	NA		0	0	0	0	0	0	0	0	0	0	0	0	0	0	0	0	0	8			#NUM!	#NUM!	#NUM!	#NUM!	#NUM!	#NUM!	#NUM!	#NUM!	#NUM!	#NUM!	#NUM!	#NUM!	#NUM!	#NUM!
OG0012529	N	N	Y		0	0		NA	NA	NA	NA		NA	NA		0	0	0	0	0	0	0	0	0	0	0	0	0	0	1	0	0	7			-0.267261	-0.267261	-0.267261	-0.267261	-0.267261	-0.267261	-0.267261	-0.267261	-0.267261	-0.267261	-0.267261	-0.267261	-0.267261	-0.267261
OG0012530	N	N	Y		0	0		NA	NA	NA	NA		NA	NA		0	0	0	0	0	0	0	0	0	0	0	0	0	0	0	0	0	8			#NUM!	#NUM!	#NUM!	#NUM!	#NUM!	#NUM!	#NUM!	#NUM!	#NUM!	#NUM!	#NUM!	#NUM!	#NUM!	#NUM!
OG0012531	N	N	Y		0	0		NA	NA	NA	NA		NA	NA		0	0	0	0	0	0	0	8	0	0	0	0	0	0	0	0	0	0			-0.267261	-0.267261	-0.267261	-0.267261	-0.267261	-0.267261	-0.267261	3.74166	-0.267261	-0.267261	-0.267261	-0.267261	-0.267261	-0.267261
OG0012532	N	N	Y		0	0		NA	NA	NA	NA		NA	NA		0	0	0	0	0	0	0	8	0	0	0	0	0	0	0	0	0	0			-0.267261	-0.267261	-0.267261	-0.267261	-0.267261	-0.267261	-0.267261	3.74166	-0.267261	-0.267261	-0.267261	-0.267261	-0.267261	-0.267261
OG0012535	N	N	Y		0	0		NA	NA	NA	NA		NA	NA		0	0	0	0	0	0	0	0	0	0	0	0	7	0	0	0	0	0			-0.267261	-0.267261	-0.267261	-0.267261	-0.267261	-0.267261	-0.267261	-0.267261	-0.267261	-0.267261	-0.267261	-0.267261	3.74166	-0.267261
OG0012541	N	N	Y		0	0		NA	NA	NA	NA		NA	NA		0	0	0	0	0	0	0	0	0	0	0	0	7	0	0	0	0	0			-0.267261	-0.267261	-0.267261	-0.267261	-0.267261	-0.267261	-0.267261	-0.267261	-0.267261	-0.267261	-0.267261	-0.267261	3.74166	-0.267261
OG0012543	N	N	Y		0	0		NA	NA	NA	NA		NA	NA		0	0	0	0	0	0	0	0	0	0	0	0	7	0	0	0	0	0			-0.267261	-0.267261	-0.267261	-0.267261	-0.267261	-0.267261	-0.267261	-0.267261	-0.267261	-0.267261	-0.267261	-0.267261	3.74166	-0.267261
OG0012545	N	N	Y		0	0		NA	NA	NA	NA		NA	NA		0	0	0	0	0	0	0	0	0	0	0	0	7	0	0	0	0	0			-0.267261	-0.267261	-0.267261	-0.267261	-0.267261	-0.267261	-0.267261	-0.267261	-0.267261	-0.267261	-0.267261	-0.267261	3.74166	-0.267261
OG0012547	N	N	Y		0	0		NA	NA	NA	NA		NA	NA		0	0	0	0	0	0	0	0	0	0	0	0	7	0	0	0	0	0			-0.267261	-0.267261	-0.267261	-0.267261	-0.267261	-0.267261	-0.267261	-0.267261	-0.267261	-0.267261	-0.267261	-0.267261	3.74166	-0.267261
OG0012548	N	N	Y		0	0		NA	NA	NA	NA		NA	NA		0	0	0	0	0	0	0	0	0	0	0	0	7	0	0	0	0	0			-0.267261	-0.267261	-0.267261	-0.267261	-0.267261	-0.267261	-0.267261	-0.267261	-0.267261	-0.267261	-0.267261	-0.267261	3.74166	-0.267261
OG0012550	N	N	Y		0	0		NA	NA	NA	NA		NA	NA		0	0	0	0	0	0	0	0	0	0	0	0	7	0	0	0	0	0			-0.267261	-0.267261	-0.267261	-0.267261	-0.267261	-0.267261	-0.267261	-0.267261	-0.267261	-0.267261	-0.267261	-0.267261	3.74166	-0.267261
OG0012640	N	N	Y		0	0		NA	NA	NA	NA		NA	NA		0	0	0	7	0	0	0	0	0	0	0	0	0	0	0	0	0	0			-0.267261	-0.267261	-0.267261	3.74166	-0.267261	-0.267261	-0.267261	-0.267261	-0.267261	-0.267261	-0.267261	-0.267261	-0.267261	-0.267261
OG0012641	N	N	Y		0	0		NA	NA	NA	NA		NA	NA		0	0	0	7	0	0	0	0	0	0	0	0	0	0	0	0	0	0			-0.267261	-0.267261	-0.267261	3.74166	-0.267261	-0.267261	-0.267261	-0.267261	-0.267261	-0.267261	-0.267261	-0.267261	-0.267261	-0.267261
OG0012782	N	N	Y		0	0		NA	NA	NA	NA		NA	NA		0	0	0	0	0	0	0	0	3	0	0	0	0	0	0	4	0	0			-0.267261	-0.267261	-0.267261	-0.267261	-0.267261	-0.267261	-0.267261	-0.267261	3.74166	-0.267261	-0.267261	-0.267261	-0.267261	-0.267261
OG0012784	N	N	Y		0	0		NA	NA	NA	NA		NA	NA		0	1	0	0	0	0	0	0	0	0	0	0	0	0	0	6	0	0			-0.267261	3.74166	-0.267261	-0.267261	-0.267261	-0.267261	-0.267261	-0.267261	-0.267261	-0.267261	-0.267261	-0.267261	-0.267261	-0.267261
OG0012785	N	N	Y		0	0		NA	NA	NA	NA		NA	NA		0	0	0	0	0	0	0	1	0	0	0	0	0	0	0	6	0	0			-0.267261	-0.267261	-0.267261	-0.267261	-0.267261	-0.267261	-0.267261	3.74166	-0.267261	-0.267261	-0.267261	-0.267261	-0.267261	-0.267261
OG0012791	N	N	Y		0	0		NA	NA	NA	NA		NA	NA		0	0	0	0	0	0	0	0	0	0	0	0	0	0	0	7	0	0			#NUM!	#NUM!	#NUM!	#NUM!	#NUM!	#NUM!	#NUM!	#NUM!	#NUM!	#NUM!	#NUM!	#NUM!	#NUM!	#NUM!
OG0012793	N	N	Y		0	0		NA	NA	NA	NA		NA	NA		0	0	0	0	0	0	0	0	0	0	0	0	0	0	0	4	3	0			#NUM!	#NUM!	#NUM!	#NUM!	#NUM!	#NUM!	#NUM!	#NUM!	#NUM!	#NUM!	#NUM!	#NUM!	#NUM!	#NUM!
OG0012794	N	N	Y		0	0		NA	NA	NA	NA		NA	NA		0	0	0	0	0	0	0	0	0	0	0	0	0	0	0	7	0	0			#NUM!	#NUM!	#NUM!	#NUM!	#NUM!	#NUM!	#NUM!	#NUM!	#NUM!	#NUM!	#NUM!	#NUM!	#NUM!	#NUM!
OG0012799	N	N	Y		0	0		NA	NA	NA	NA		NA	NA		0	0	0	0	0	0	0	0	0	0	0	0	0	0	0	4	2	1			#NUM!	#NUM!	#NUM!	#NUM!	#NUM!	#NUM!	#NUM!	#NUM!	#NUM!	#NUM!	#NUM!	#NUM!	#NUM!	#NUM!
OG0012801	N	N	Y		0	0		NA	NA	NA	NA		NA	NA		0	0	0	0	0	0	0	0	0	0	0	0	0	0	0	4	3	0			#NUM!	#NUM!	#NUM!	#NUM!	#NUM!	#NUM!	#NUM!	#NUM!	#NUM!	#NUM!	#NUM!	#NUM!	#NUM!	#NUM!
OG0012814	N	N	Y		0	0		NA	NA	NA	NA		NA	NA		0	0	0	0	0	0	0	0	0	1	0	0	0	0	0	4	2	0			-0.267261	-0.267261	-0.267261	-0.267261	-0.267261	-0.267261	-0.267261	-0.267261	-0.267261	3.74166	-0.267261	-0.267261	-0.267261	-0.267261
OG0012815	N	N	Y		0	0		NA	NA	NA	NA		NA	NA		0	0	0	0	0	0	0	0	0	0	0	0	0	0	0	7	0	0			#NUM!	#NUM!	#NUM!	#NUM!	#NUM!	#NUM!	#NUM!	#NUM!	#NUM!	#NUM!	#NUM!	#NUM!	#NUM!	#NUM!
OG0012816	N	N	Y		0	0		NA	NA	NA	NA		NA	NA		0	0	0	0	0	0	0	0	0	0	0	0	0	0	0	2	5	0			#NUM!	#NUM!	#NUM!	#NUM!	#NUM!	#NUM!	#NUM!	#NUM!	#NUM!	#NUM!	#NUM!	#NUM!	#NUM!	#NUM!
OG0012823	N	N	Y		0	0		NA	NA	NA	NA		NA	NA		0	0	0	0	0	3	0	0	0	0	0	0	0	0	0	4	0	0			-0.267261	-0.267261	-0.267261	-0.267261	-0.267261	3.74166	-0.267261	-0.267261	-0.267261	-0.267261	-0.267261	-0.267261	-0.267261	-0.267261
OG0012829	N	N	Y		0	0		NA	NA	NA	NA		NA	NA		0	0	0	0	0	0	0	0	0	0	0	0	0	0	0	7	0	0			#NUM!	#NUM!	#NUM!	#NUM!	#NUM!	#NUM!	#NUM!	#NUM!	#NUM!	#NUM!	#NUM!	#NUM!	#NUM!	#NUM!
OG0012832	N	N	Y		0	0		NA	NA	NA	NA		NA	NA		0	0	0	0	0	0	0	0	0	0	0	0	0	0	0	7	0	0			#NUM!	#NUM!	#NUM!	#NUM!	#NUM!	#NUM!	#NUM!	#NUM!	#NUM!	#NUM!	#NUM!	#NUM!	#NUM!	#NUM!
OG0012843	N	N	Y		0	0		NA	NA	NA	NA		NA	NA		0	0	0	0	0	0	0	0	6	0	0	0	0	0	0	1	0	0			-0.267261	-0.267261	-0.267261	-0.267261	-0.267261	-0.267261	-0.267261	-0.267261	3.74166	-0.267261	-0.267261	-0.267261	-0.267261	-0.267261
OG0012847	N	N	Y		0	0		NA	NA	NA	NA		NA	NA		0	0	0	0	0	0	0	0	0	0	6	0	0	0	0	1	0	0			-0.267261	-0.267261	-0.267261	-0.267261	-0.267261	-0.267261	-0.267261	-0.267261	-0.267261	-0.267261	3.74166	-0.267261	-0.267261	-0.267261
OG0012850	N	N	Y		0	0		NA	NA	NA	NA		NA	NA		0	0	0	0	0	0	0	0	0	1	0	0	0	0	0	1	2	3			-0.267261	-0.267261	-0.267261	-0.267261	-0.267261	-0.267261	-0.267261	-0.267261	-0.267261	3.74166	-0.267261	-0.267261	-0.267261	-0.267261
OG0012851	N	N	Y		0	0		NA	NA	NA	NA		NA	NA		0	0	0	0	0	0	0	0	0	0	0	0	0	0	0	1	6	0			#NUM!	#NUM!	#NUM!	#NUM!	#NUM!	#NUM!	#NUM!	#NUM!	#NUM!	#NUM!	#NUM!	#NUM!	#NUM!	#NUM!
OG0012852	N	N	Y		0	0		NA	NA	NA	NA		NA	NA		0	0	0	0	0	0	0	0	0	0	0	0	0	0	0	1	6	0			#NUM!	#NUM!	#NUM!	#NUM!	#NUM!	#NUM!	#NUM!	#NUM!	#NUM!	#NUM!	#NUM!	#NUM!	#NUM!	#NUM!
OG0012855	N	N	Y		0	0		NA	NA	NA	NA		NA	NA		0	0	0	0	0	0	0	0	0	0	0	0	0	0	1	1	0	5			-0.267261	-0.267261	-0.267261	-0.267261	-0.267261	-0.267261	-0.267261	-0.267261	-0.267261	-0.267261	-0.267261	-0.267261	-0.267261	-0.267261
OG0012870	N	N	Y		0	0		NA	NA	NA	NA		NA	NA		0	0	0	0	0	0	0	0	0	0	0	0	0	0	0	2	5	0			#NUM!	#NUM!	#NUM!	#NUM!	#NUM!	#NUM!	#NUM!	#NUM!	#NUM!	#NUM!	#NUM!	#NUM!	#NUM!	#NUM!
OG0012874	N	N	Y		0	0		NA	NA	NA	NA		NA	NA		0	0	0	0	0	0	0	0	0	0	0	0	0	0	1	2	4	0			-0.267261	-0.267261	-0.267261	-0.267261	-0.267261	-0.267261	-0.267261	-0.267261	-0.267261	-0.267261	-0.267261	-0.267261	-0.267261	-0.267261
OG0012943	N	N	Y		0	0		NA	NA	NA	NA		NA	NA		0	0	0	0	0	0	0	0	0	0	0	7	0	0	0	0	0	0			-0.267261	-0.267261	-0.267261	-0.267261	-0.267261	-0.267261	-0.267261	-0.267261	-0.267261	-0.267261	-0.267261	3.74166	-0.267261	-0.267261
OG0012944	N	N	Y		0	0		NA	NA	NA	NA		NA	NA		0	0	0	0	0	0	0	0	0	0	0	6	0	0	0	0	1	0			-0.267261	-0.267261	-0.267261	-0.267261	-0.267261	-0.267261	-0.267261	-0.267261	-0.267261	-0.267261	-0.267261	3.74166	-0.267261	-0.267261
OG0012948	N	N	Y		0	0		NA	NA	NA	NA		NA	NA		0	0	0	0	0	0	0	0	0	0	0	7	0	0	0	0	0	0			-0.267261	-0.267261	-0.267261	-0.267261	-0.267261	-0.267261	-0.267261	-0.267261	-0.267261	-0.267261	-0.267261	3.74166	-0.267261	-0.267261
OG0012955	N	N	Y		0	0		NA	NA	NA	NA		NA	NA		0	0	0	0	0	0	0	0	0	7	0	0	0	0	0	0	0	0			-0.267261	-0.267261	-0.267261	-0.267261	-0.267261	-0.267261	-0.267261	-0.267261	-0.267261	3.74166	-0.267261	-0.267261	-0.267261	-0.267261
OG0012958	N	N	Y		0	0		NA	NA	NA	NA		NA	NA		0	0	0	0	0	0	0	0	0	7	0	0	0	0	0	0	0	0			-0.267261	-0.267261	-0.267261	-0.267261	-0.267261	-0.267261	-0.267261	-0.267261	-0.267261	3.74166	-0.267261	-0.267261	-0.267261	-0.267261
OG0012960	N	N	Y		0	0		NA	NA	NA	NA		NA	NA		0	0	0	0	0	0	0	0	0	5	0	0	0	0	0	0	2	0			-0.267261	-0.267261	-0.267261	-0.267261	-0.267261	-0.267261	-0.267261	-0.267261	-0.267261	3.74166	-0.267261	-0.267261	-0.267261	-0.267261
OG0012961	N	N	Y		0	0		NA	NA	NA	NA		NA	NA		0	0	0	0	0	0	0	0	0	6	0	0	0	0	0	0	1	0			-0.267261	-0.267261	-0.267261	-0.267261	-0.267261	-0.267261	-0.267261	-0.267261	-0.267261	3.74166	-0.267261	-0.267261	-0.267261	-0.267261
OG0012963	N	N	Y		0	0		NA	NA	NA	NA		NA	NA		0	0	0	0	0	0	0	0	0	7	0	0	0	0	0	0	0	0			-0.267261	-0.267261	-0.267261	-0.267261	-0.267261	-0.267261	-0.267261	-0.267261	-0.267261	3.74166	-0.267261	-0.267261	-0.267261	-0.267261
OG0012964	N	N	Y		0	0		NA	NA	NA	NA		NA	NA		0	0	0	0	0	0	0	0	0	7	0	0	0	0	0	0	0	0			-0.267261	-0.267261	-0.267261	-0.267261	-0.267261	-0.267261	-0.267261	-0.267261	-0.267261	3.74166	-0.267261	-0.267261	-0.267261	-0.267261
OG0012965	N	N	Y		0	0		NA	NA	NA	NA		NA	NA		0	0	0	0	0	0	0	0	0	6	0	0	0	0	0	0	1	0			-0.267261	-0.267261	-0.267261	-0.267261	-0.267261	-0.267261	-0.267261	-0.267261	-0.267261	3.74166	-0.267261	-0.267261	-0.267261	-0.267261
OG0012966	N	N	Y		0	0		NA	NA	NA	NA		NA	NA		0	0	0	0	0	0	0	0	0	7	0	0	0	0	0	0	0	0			-0.267261	-0.267261	-0.267261	-0.267261	-0.267261	-0.267261	-0.267261	-0.267261	-0.267261	3.74166	-0.267261	-0.267261	-0.267261	-0.267261
OG0012970	N	N	Y		0	0		NA	NA	NA	NA		NA	NA		0	0	0	0	0	0	0	0	0	7	0	0	0	0	0	0	0	0			-0.267261	-0.267261	-0.267261	-0.267261	-0.267261	-0.267261	-0.267261	-0.267261	-0.267261	3.74166	-0.267261	-0.267261	-0.267261	-0.267261
OG0012976	N	N	Y		0	0		NA	NA	NA	NA		NA	NA		0	0	0	0	0	0	0	0	0	7	0	0	0	0	0	0	0	0			-0.267261	-0.267261	-0.267261	-0.267261	-0.267261	-0.267261	-0.267261	-0.267261	-0.267261	3.74166	-0.267261	-0.267261	-0.267261	-0.267261
OG0012986	N	N	Y		0	0		NA	NA	NA	NA		NA	NA		0	0	0	0	0	0	0	0	0	4	0	0	0	0	0	0	3	0			-0.267261	-0.267261	-0.267261	-0.267261	-0.267261	-0.267261	-0.267261	-0.267261	-0.267261	3.74166	-0.267261	-0.267261	-0.267261	-0.267261
OG0013041	N	N	Y		0	0		NA	NA	NA	NA		NA	NA		0	0	0	0	0	0	0	0	7	0	0	0	0	0	0	0	0	0			-0.267261	-0.267261	-0.267261	-0.267261	-0.267261	-0.267261	-0.267261	-0.267261	3.74166	-0.267261	-0.267261	-0.267261	-0.267261	-0.267261
OG0013064	N	N	Y		0	0		NA	NA	NA	NA		NA	NA		0	0	0	0	0	0	0	0	7	0	0	0	0	0	0	0	0	0			-0.267261	-0.267261	-0.267261	-0.267261	-0.267261	-0.267261	-0.267261	-0.267261	3.74166	-0.267261	-0.267261	-0.267261	-0.267261	-0.267261
OG0013069	N	N	Y		0	0		NA	NA	NA	NA		NA	NA		0	0	0	0	0	0	0	0	0	0	7	0	0	0	0	0	0	0			-0.267261	-0.267261	-0.267261	-0.267261	-0.267261	-0.267261	-0.267261	-0.267261	-0.267261	-0.267261	3.74166	-0.267261	-0.267261	-0.267261
OG0013070	N	N	Y		0	0		NA	NA	NA	NA		NA	NA		0	0	0	0	0	0	0	0	0	0	7	0	0	0	0	0	0	0			-0.267261	-0.267261	-0.267261	-0.267261	-0.267261	-0.267261	-0.267261	-0.267261	-0.267261	-0.267261	3.74166	-0.267261	-0.267261	-0.267261
OG0013072	N	N	Y		0	0		NA	NA	NA	NA		NA	NA		0	0	0	0	0	0	0	0	0	0	7	0	0	0	0	0	0	0			-0.267261	-0.267261	-0.267261	-0.267261	-0.267261	-0.267261	-0.267261	-0.267261	-0.267261	-0.267261	3.74166	-0.267261	-0.267261	-0.267261
OG0013073	N	N	Y		0	0		NA	NA	NA	NA		NA	NA		0	0	0	0	0	0	0	0	0	0	7	0	0	0	0	0	0	0			-0.267261	-0.267261	-0.267261	-0.267261	-0.267261	-0.267261	-0.267261	-0.267261	-0.267261	-0.267261	3.74166	-0.267261	-0.267261	-0.267261
OG0013075	N	N	Y		0	0		NA	NA	NA	NA		NA	NA		0	0	0	0	0	0	0	0	0	0	3	0	0	0	0	0	0	4			-0.267261	-0.267261	-0.267261	-0.267261	-0.267261	-0.267261	-0.267261	-0.267261	-0.267261	-0.267261	3.74166	-0.267261	-0.267261	-0.267261
OG0013077	N	N	Y		0	0		NA	NA	NA	NA		NA	NA		0	0	0	0	0	0	0	0	0	0	7	0	0	0	0	0	0	0			-0.267261	-0.267261	-0.267261	-0.267261	-0.267261	-0.267261	-0.267261	-0.267261	-0.267261	-0.267261	3.74166	-0.267261	-0.267261	-0.267261
OG0013078	N	N	Y		0	0		NA	NA	NA	NA		NA	NA		0	0	0	0	0	0	0	0	0	0	7	0	0	0	0	0	0	0			-0.267261	-0.267261	-0.267261	-0.267261	-0.267261	-0.267261	-0.267261	-0.267261	-0.267261	-0.267261	3.74166	-0.267261	-0.267261	-0.267261
OG0013079	N	N	Y		0	0		NA	NA	NA	NA		NA	NA		0	0	0	0	0	0	0	0	0	0	7	0	0	0	0	0	0	0			-0.267261	-0.267261	-0.267261	-0.267261	-0.267261	-0.267261	-0.267261	-0.267261	-0.267261	-0.267261	3.74166	-0.267261	-0.267261	-0.267261
OG0013083	N	N	Y		0	0		NA	NA	NA	NA		NA	NA		0	0	0	0	0	0	0	0	0	0	7	0	0	0	0	0	0	0			-0.267261	-0.267261	-0.267261	-0.267261	-0.267261	-0.267261	-0.267261	-0.267261	-0.267261	-0.267261	3.74166	-0.267261	-0.267261	-0.267261
OG0013084	N	N	Y		0	0		NA	NA	NA	NA		NA	NA		0	0	0	0	0	0	0	0	0	0	7	0	0	0	0	0	0	0			-0.267261	-0.267261	-0.267261	-0.267261	-0.267261	-0.267261	-0.267261	-0.267261	-0.267261	-0.267261	3.74166	-0.267261	-0.267261	-0.267261
OG0013087	N	N	Y		0	0		NA	NA	NA	NA		NA	NA		0	7	0	0	0	0	0	0	0	0	0	0	0	0	0	0	0	0			-0.267261	3.74166	-0.267261	-0.267261	-0.267261	-0.267261	-0.267261	-0.267261	-0.267261	-0.267261	-0.267261	-0.267261	-0.267261	-0.267261
OG0013089	N	N	Y		0	0		NA	NA	NA	NA		NA	NA		0	7	0	0	0	0	0	0	0	0	0	0	0	0	0	0	0	0			-0.267261	3.74166	-0.267261	-0.267261	-0.267261	-0.267261	-0.267261	-0.267261	-0.267261	-0.267261	-0.267261	-0.267261	-0.267261	-0.267261
OG0013093	N	N	Y		0	0		NA	NA	NA	NA		NA	NA		0	7	0	0	0	0	0	0	0	0	0	0	0	0	0	0	0	0			-0.267261	3.74166	-0.267261	-0.267261	-0.267261	-0.267261	-0.267261	-0.267261	-0.267261	-0.267261	-0.267261	-0.267261	-0.267261	-0.267261
OG0013094	N	N	Y		0	0		NA	NA	NA	NA		NA	NA		0	7	0	0	0	0	0	0	0	0	0	0	0	0	0	0	0	0			-0.267261	3.74166	-0.267261	-0.267261	-0.267261	-0.267261	-0.267261	-0.267261	-0.267261	-0.267261	-0.267261	-0.267261	-0.267261	-0.267261
OG0013098	N	N	Y		0	0		NA	NA	NA	NA		NA	NA		0	7	0	0	0	0	0	0	0	0	0	0	0	0	0	0	0	0			-0.267261	3.74166	-0.267261	-0.267261	-0.267261	-0.267261	-0.267261	-0.267261	-0.267261	-0.267261	-0.267261	-0.267261	-0.267261	-0.267261
OG0013102	N	N	Y		0	0		NA	NA	NA	NA		NA	NA		0	1	0	0	0	0	0	0	0	0	0	0	0	0	0	0	6	0			-0.267261	3.74166	-0.267261	-0.267261	-0.267261	-0.267261	-0.267261	-0.267261	-0.267261	-0.267261	-0.267261	-0.267261	-0.267261	-0.267261
OG0013113	N	N	Y		0	0		NA	NA	NA	NA		NA	NA		0	0	0	0	0	7	0	0	0	0	0	0	0	0	0	0	0	0			-0.267261	-0.267261	-0.267261	-0.267261	-0.267261	3.74166	-0.267261	-0.267261	-0.267261	-0.267261	-0.267261	-0.267261	-0.267261	-0.267261
OG0013117	N	N	Y		0	0		NA	NA	NA	NA		NA	NA		0	0	0	0	0	5	0	0	0	0	0	0	0	0	0	0	2	0			-0.267261	-0.267261	-0.267261	-0.267261	-0.267261	3.74166	-0.267261	-0.267261	-0.267261	-0.267261	-0.267261	-0.267261	-0.267261	-0.267261
OG0013120	N	N	Y		0	0		NA	NA	NA	NA		NA	NA		0	0	0	0	0	7	0	0	0	0	0	0	0	0	0	0	0	0			-0.267261	-0.267261	-0.267261	-0.267261	-0.267261	3.74166	-0.267261	-0.267261	-0.267261	-0.267261	-0.267261	-0.267261	-0.267261	-0.267261
OG0013123	N	N	Y		0	0		NA	NA	NA	NA		NA	NA		0	0	0	0	0	7	0	0	0	0	0	0	0	0	0	0	0	0			-0.267261	-0.267261	-0.267261	-0.267261	-0.267261	3.74166	-0.267261	-0.267261	-0.267261	-0.267261	-0.267261	-0.267261	-0.267261	-0.267261
OG0013124	N	N	Y		0	0		NA	NA	NA	NA		NA	NA		0	0	0	0	0	6	0	0	0	0	0	0	0	0	0	0	1	0			-0.267261	-0.267261	-0.267261	-0.267261	-0.267261	3.74166	-0.267261	-0.267261	-0.267261	-0.267261	-0.267261	-0.267261	-0.267261	-0.267261
OG0013127	N	N	Y		0	0		NA	NA	NA	NA		NA	NA		0	0	0	0	0	1	0	0	0	0	0	0	0	0	0	0	6	0			-0.267261	-0.267261	-0.267261	-0.267261	-0.267261	3.74166	-0.267261	-0.267261	-0.267261	-0.267261	-0.267261	-0.267261	-0.267261	-0.267261
OG0013128	N	N	Y		0	0		NA	NA	NA	NA		NA	NA		0	0	0	0	0	2	0	0	0	0	0	0	0	0	0	0	5	0			-0.267261	-0.267261	-0.267261	-0.267261	-0.267261	3.74166	-0.267261	-0.267261	-0.267261	-0.267261	-0.267261	-0.267261	-0.267261	-0.267261
OG0013131	N	N	Y		0	0		NA	NA	NA	NA		NA	NA		0	0	0	0	4	0	0	0	0	0	0	0	0	0	0	0	3	0			-0.267261	-0.267261	-0.267261	-0.267261	3.74166	-0.267261	-0.267261	-0.267261	-0.267261	-0.267261	-0.267261	-0.267261	-0.267261	-0.267261
OG0013132	N	N	Y		0	0		NA	NA	NA	NA		NA	NA		0	0	0	0	0	0	0	0	0	0	0	0	0	0	0	0	7	0			#NUM!	#NUM!	#NUM!	#NUM!	#NUM!	#NUM!	#NUM!	#NUM!	#NUM!	#NUM!	#NUM!	#NUM!	#NUM!	#NUM!
OG0013133	N	N	Y		0	0		NA	NA	NA	NA		NA	NA		0	0	0	0	0	0	0	0	0	0	0	0	0	0	0	0	7	0			#NUM!	#NUM!	#NUM!	#NUM!	#NUM!	#NUM!	#NUM!	#NUM!	#NUM!	#NUM!	#NUM!	#NUM!	#NUM!	#NUM!
OG0013135	N	N	Y		0	0		NA	NA	NA	NA		NA	NA		0	0	0	0	0	0	0	0	0	0	0	0	0	0	0	0	7	0			#NUM!	#NUM!	#NUM!	#NUM!	#NUM!	#NUM!	#NUM!	#NUM!	#NUM!	#NUM!	#NUM!	#NUM!	#NUM!	#NUM!
OG0013136	N	N	Y		0	0		NA	NA	NA	NA		NA	NA		0	0	0	0	0	0	0	0	0	0	0	0	0	0	0	0	7	0			#NUM!	#NUM!	#NUM!	#NUM!	#NUM!	#NUM!	#NUM!	#NUM!	#NUM!	#NUM!	#NUM!	#NUM!	#NUM!	#NUM!
OG0013137	N	N	Y		0	0		NA	NA	NA	NA		NA	NA		0	0	0	0	0	0	0	0	0	0	0	0	0	0	0	0	7	0			#NUM!	#NUM!	#NUM!	#NUM!	#NUM!	#NUM!	#NUM!	#NUM!	#NUM!	#NUM!	#NUM!	#NUM!	#NUM!	#NUM!
OG0013138	N	N	Y		0	0		NA	NA	NA	NA		NA	NA		0	0	0	0	0	0	0	0	0	0	0	0	0	0	0	0	7	0			#NUM!	#NUM!	#NUM!	#NUM!	#NUM!	#NUM!	#NUM!	#NUM!	#NUM!	#NUM!	#NUM!	#NUM!	#NUM!	#NUM!
OG0013139	N	N	Y		0	0		NA	NA	NA	NA		NA	NA		0	0	0	0	0	0	0	0	0	0	0	0	0	0	0	0	7	0			#NUM!	#NUM!	#NUM!	#NUM!	#NUM!	#NUM!	#NUM!	#NUM!	#NUM!	#NUM!	#NUM!	#NUM!	#NUM!	#NUM!
OG0013142	N	N	Y		0	0		NA	NA	NA	NA		NA	NA		0	0	0	0	7	0	0	0	0	0	0	0	0	0	0	0	0	0			-0.267261	-0.267261	-0.267261	-0.267261	3.74166	-0.267261	-0.267261	-0.267261	-0.267261	-0.267261	-0.267261	-0.267261	-0.267261	-0.267261
OG0013207	N	N	Y		0	0		NA	NA	NA	NA		NA	NA		0	0	0	0	0	0	7	0	0	0	0	0	0	0	0	0	0	0			-0.267261	-0.267261	-0.267261	-0.267261	-0.267261	-0.267261	3.74166	-0.267261	-0.267261	-0.267261	-0.267261	-0.267261	-0.267261	-0.267261
OG0013208	N	N	Y		0	0		NA	NA	NA	NA		NA	NA		0	0	0	0	0	0	7	0	0	0	0	0	0	0	0	0	0	0			-0.267261	-0.267261	-0.267261	-0.267261	-0.267261	-0.267261	3.74166	-0.267261	-0.267261	-0.267261	-0.267261	-0.267261	-0.267261	-0.267261
OG0013209	N	N	Y		0	0		NA	NA	NA	NA		NA	NA		0	0	0	0	0	0	7	0	0	0	0	0	0	0	0	0	0	0			-0.267261	-0.267261	-0.267261	-0.267261	-0.267261	-0.267261	3.74166	-0.267261	-0.267261	-0.267261	-0.267261	-0.267261	-0.267261	-0.267261
OG0013210	N	N	Y		0	0		NA	NA	NA	NA		NA	NA		0	0	0	0	0	0	5	0	0	0	0	0	0	0	0	0	0	2			-0.267261	-0.267261	-0.267261	-0.267261	-0.267261	-0.267261	3.74166	-0.267261	-0.267261	-0.267261	-0.267261	-0.267261	-0.267261	-0.267261
OG0013211	N	N	Y		0	0		NA	NA	NA	NA		NA	NA		7	0	0	0	0	0	0	0	0	0	0	0	0	0	0	0	0	0			3.74166	-0.267261	-0.267261	-0.267261	-0.267261	-0.267261	-0.267261	-0.267261	-0.267261	-0.267261	-0.267261	-0.267261	-0.267261	-0.267261
OG0013212	N	N	Y		0	0		NA	NA	NA	NA		NA	NA		7	0	0	0	0	0	0	0	0	0	0	0	0	0	0	0	0	0			3.74166	-0.267261	-0.267261	-0.267261	-0.267261	-0.267261	-0.267261	-0.267261	-0.267261	-0.267261	-0.267261	-0.267261	-0.267261	-0.267261
OG0013213	N	N	Y		0	0		NA	NA	NA	NA		NA	NA		0	0	0	0	0	0	0	1	0	0	0	0	0	0	0	0	0	6			-0.267261	-0.267261	-0.267261	-0.267261	-0.267261	-0.267261	-0.267261	3.74166	-0.267261	-0.267261	-0.267261	-0.267261	-0.267261	-0.267261
OG0013214	N	N	Y		0	0		NA	NA	NA	NA		NA	NA		0	0	0	0	0	0	0	0	0	0	0	0	0	0	0	0	0	7			#NUM!	#NUM!	#NUM!	#NUM!	#NUM!	#NUM!	#NUM!	#NUM!	#NUM!	#NUM!	#NUM!	#NUM!	#NUM!	#NUM!
OG0013215	N	N	Y		0	0		NA	NA	NA	NA		NA	NA		0	0	0	0	0	0	0	0	0	0	0	0	0	0	0	0	0	7			#NUM!	#NUM!	#NUM!	#NUM!	#NUM!	#NUM!	#NUM!	#NUM!	#NUM!	#NUM!	#NUM!	#NUM!	#NUM!	#NUM!
OG0013216	N	N	Y		0	0		NA	NA	NA	NA		NA	NA		0	0	0	0	0	0	0	0	0	0	0	0	0	0	0	0	0	7			#NUM!	#NUM!	#NUM!	#NUM!	#NUM!	#NUM!	#NUM!	#NUM!	#NUM!	#NUM!	#NUM!	#NUM!	#NUM!	#NUM!
OG0013217	N	N	Y		0	0		NA	NA	NA	NA		NA	NA		0	0	0	0	0	0	0	0	0	0	0	0	0	0	1	0	0	6			-0.267261	-0.267261	-0.267261	-0.267261	-0.267261	-0.267261	-0.267261	-0.267261	-0.267261	-0.267261	-0.267261	-0.267261	-0.267261	-0.267261
OG0013218	N	N	Y		0	0		NA	NA	NA	NA		NA	NA		0	0	0	0	0	0	0	0	0	0	0	0	0	0	7	0	0	0			-0.267261	-0.267261	-0.267261	-0.267261	-0.267261	-0.267261	-0.267261	-0.267261	-0.267261	-0.267261	-0.267261	-0.267261	-0.267261	-0.267261
OG0013219	N	N	Y		0	0		NA	NA	NA	NA		NA	NA		0	0	0	0	0	0	0	7	0	0	0	0	0	0	0	0	0	0			-0.267261	-0.267261	-0.267261	-0.267261	-0.267261	-0.267261	-0.267261	3.74166	-0.267261	-0.267261	-0.267261	-0.267261	-0.267261	-0.267261
OG0013220	N	N	Y		0	0		NA	NA	NA	NA		NA	NA		0	0	0	0	0	0	0	7	0	0	0	0	0	0	0	0	0	0			-0.267261	-0.267261	-0.267261	-0.267261	-0.267261	-0.267261	-0.267261	3.74166	-0.267261	-0.267261	-0.267261	-0.267261	-0.267261	-0.267261
OG0013225	N	N	Y		0	0		NA	NA	NA	NA		NA	NA		0	0	0	0	0	0	0	0	0	0	0	0	6	0	0	0	0	0			-0.267261	-0.267261	-0.267261	-0.267261	-0.267261	-0.267261	-0.267261	-0.267261	-0.267261	-0.267261	-0.267261	-0.267261	3.74166	-0.267261
OG0013228	N	N	Y		0	0		NA	NA	NA	NA		NA	NA		0	0	0	0	0	0	0	0	0	0	0	0	6	0	0	0	0	0			-0.267261	-0.267261	-0.267261	-0.267261	-0.267261	-0.267261	-0.267261	-0.267261	-0.267261	-0.267261	-0.267261	-0.267261	3.74166	-0.267261
OG0013250	N	N	Y		0	0		NA	NA	NA	NA		NA	NA		0	0	0	0	0	0	0	0	0	0	0	0	6	0	0	0	0	0			-0.267261	-0.267261	-0.267261	-0.267261	-0.267261	-0.267261	-0.267261	-0.267261	-0.267261	-0.267261	-0.267261	-0.267261	3.74166	-0.267261
OG0013270	N	N	Y		0	0		NA	NA	NA	NA		NA	NA		0	0	0	0	0	0	0	0	0	0	0	0	6	0	0	0	0	0			-0.267261	-0.267261	-0.267261	-0.267261	-0.267261	-0.267261	-0.267261	-0.267261	-0.267261	-0.267261	-0.267261	-0.267261	3.74166	-0.267261
OG0013290	N	N	Y		0	0		NA	NA	NA	NA		NA	NA		0	0	0	0	0	0	0	0	0	0	0	0	6	0	0	0	0	0			-0.267261	-0.267261	-0.267261	-0.267261	-0.267261	-0.267261	-0.267261	-0.267261	-0.267261	-0.267261	-0.267261	-0.267261	3.74166	-0.267261
OG0013358	N	N	Y		0	0		NA	NA	NA	NA		NA	NA		0	0	0	5	0	0	0	0	0	0	0	0	0	0	0	1	0	0			-0.267261	-0.267261	-0.267261	3.74166	-0.267261	-0.267261	-0.267261	-0.267261	-0.267261	-0.267261	-0.267261	-0.267261	-0.267261	-0.267261
OG0013368	N	N	Y		0	0		NA	NA	NA	NA		NA	NA		0	0	0	6	0	0	0	0	0	0	0	0	0	0	0	0	0	0			-0.267261	-0.267261	-0.267261	3.74166	-0.267261	-0.267261	-0.267261	-0.267261	-0.267261	-0.267261	-0.267261	-0.267261	-0.267261	-0.267261
OG0013381	N	N	Y		0	0		NA	NA	NA	NA		NA	NA		0	0	0	6	0	0	0	0	0	0	0	0	0	0	0	0	0	0			-0.267261	-0.267261	-0.267261	3.74166	-0.267261	-0.267261	-0.267261	-0.267261	-0.267261	-0.267261	-0.267261	-0.267261	-0.267261	-0.267261
OG0013514	N	N	Y		0	0		NA	NA	NA	NA		NA	NA		0	0	0	0	0	0	0	0	0	0	0	0	0	0	0	6	0	0			#NUM!	#NUM!	#NUM!	#NUM!	#NUM!	#NUM!	#NUM!	#NUM!	#NUM!	#NUM!	#NUM!	#NUM!	#NUM!	#NUM!
OG0013518	N	N	Y		0	0		NA	NA	NA	NA		NA	NA		0	0	0	0	0	0	0	0	0	0	0	0	0	0	0	5	1	0			#NUM!	#NUM!	#NUM!	#NUM!	#NUM!	#NUM!	#NUM!	#NUM!	#NUM!	#NUM!	#NUM!	#NUM!	#NUM!	#NUM!
OG0013519	N	N	Y		0	0		NA	NA	NA	NA		NA	NA		0	0	0	0	0	0	0	0	0	0	0	0	0	0	0	5	1	0			#NUM!	#NUM!	#NUM!	#NUM!	#NUM!	#NUM!	#NUM!	#NUM!	#NUM!	#NUM!	#NUM!	#NUM!	#NUM!	#NUM!
OG0013522	N	N	Y		0	0		NA	NA	NA	NA		NA	NA		0	0	0	0	0	0	0	0	0	0	1	0	0	0	0	3	2	0			-0.267261	-0.267261	-0.267261	-0.267261	-0.267261	-0.267261	-0.267261	-0.267261	-0.267261	-0.267261	3.74166	-0.267261	-0.267261	-0.267261
OG0013523	N	N	Y		0	0		NA	NA	NA	NA		NA	NA		0	0	0	0	0	0	0	0	0	0	0	0	0	0	0	6	0	0			#NUM!	#NUM!	#NUM!	#NUM!	#NUM!	#NUM!	#NUM!	#NUM!	#NUM!	#NUM!	#NUM!	#NUM!	#NUM!	#NUM!
OG0013525	N	N	Y		0	0		NA	NA	NA	NA		NA	NA		0	0	0	0	0	0	0	0	0	0	0	0	0	0	0	6	0	0			#NUM!	#NUM!	#NUM!	#NUM!	#NUM!	#NUM!	#NUM!	#NUM!	#NUM!	#NUM!	#NUM!	#NUM!	#NUM!	#NUM!
OG0013529	N	N	Y		0	0		NA	NA	NA	NA		NA	NA		0	0	0	0	0	0	0	1	0	0	0	0	0	0	0	1	4	0			-0.267261	-0.267261	-0.267261	-0.267261	-0.267261	-0.267261	-0.267261	3.74166	-0.267261	-0.267261	-0.267261	-0.267261	-0.267261	-0.267261
OG0013533	N	N	Y		0	0		NA	NA	NA	NA		NA	NA		0	0	0	0	0	0	0	2	0	0	0	0	0	0	0	2	0	2			-0.267261	-0.267261	-0.267261	-0.267261	-0.267261	-0.267261	-0.267261	3.74166	-0.267261	-0.267261	-0.267261	-0.267261	-0.267261	-0.267261
OG0013537	N	N	Y		0	0		NA	NA	NA	NA		NA	NA		0	0	0	0	0	0	0	0	0	0	0	0	0	0	0	6	0	0			#NUM!	#NUM!	#NUM!	#NUM!	#NUM!	#NUM!	#NUM!	#NUM!	#NUM!	#NUM!	#NUM!	#NUM!	#NUM!	#NUM!
OG0013542	N	N	Y		0	0		NA	NA	NA	NA		NA	NA		0	0	0	0	0	0	0	0	0	0	0	0	0	0	1	2	0	3			-0.267261	-0.267261	-0.267261	-0.267261	-0.267261	-0.267261	-0.267261	-0.267261	-0.267261	-0.267261	-0.267261	-0.267261	-0.267261	-0.267261
OG0013544	N	N	Y		0	0		NA	NA	NA	NA		NA	NA		0	0	0	0	0	0	0	0	0	0	0	0	0	0	0	6	0	0			#NUM!	#NUM!	#NUM!	#NUM!	#NUM!	#NUM!	#NUM!	#NUM!	#NUM!	#NUM!	#NUM!	#NUM!	#NUM!	#NUM!
OG0013547	N	N	Y		0	0		NA	NA	NA	NA		NA	NA		0	0	0	0	0	0	0	0	0	2	0	0	0	0	0	2	2	0			-0.267261	-0.267261	-0.267261	-0.267261	-0.267261	-0.267261	-0.267261	-0.267261	-0.267261	3.74166	-0.267261	-0.267261	-0.267261	-0.267261
OG0013550	N	N	Y		0	0		NA	NA	NA	NA		NA	NA		0	0	0	0	0	0	0	0	0	0	0	0	0	0	0	1	5	0			#NUM!	#NUM!	#NUM!	#NUM!	#NUM!	#NUM!	#NUM!	#NUM!	#NUM!	#NUM!	#NUM!	#NUM!	#NUM!	#NUM!
OG0013554	N	N	Y		0	0		NA	NA	NA	NA		NA	NA		0	0	0	0	0	0	0	0	0	0	0	0	0	0	0	6	0	0			#NUM!	#NUM!	#NUM!	#NUM!	#NUM!	#NUM!	#NUM!	#NUM!	#NUM!	#NUM!	#NUM!	#NUM!	#NUM!	#NUM!
OG0013561	N	N	Y		0	0		NA	NA	NA	NA		NA	NA		0	0	0	0	0	0	0	0	2	0	0	0	0	0	0	4	0	0			-0.267261	-0.267261	-0.267261	-0.267261	-0.267261	-0.267261	-0.267261	-0.267261	3.74166	-0.267261	-0.267261	-0.267261	-0.267261	-0.267261
OG0013562	N	N	Y		0	0		NA	NA	NA	NA		NA	NA		0	0	0	0	0	0	0	0	1	0	0	0	0	0	0	1	4	0			-0.267261	-0.267261	-0.267261	-0.267261	-0.267261	-0.267261	-0.267261	-0.267261	3.74166	-0.267261	-0.267261	-0.267261	-0.267261	-0.267261
OG0013563	N	N	Y		0	0		NA	NA	NA	NA		NA	NA		0	0	0	0	0	0	0	0	0	0	0	0	0	0	0	6	0	0			#NUM!	#NUM!	#NUM!	#NUM!	#NUM!	#NUM!	#NUM!	#NUM!	#NUM!	#NUM!	#NUM!	#NUM!	#NUM!	#NUM!
OG0013577	N	N	Y		0	0		NA	NA	NA	NA		NA	NA		0	0	0	0	0	0	0	0	0	0	0	0	0	0	0	6	0	0			#NUM!	#NUM!	#NUM!	#NUM!	#NUM!	#NUM!	#NUM!	#NUM!	#NUM!	#NUM!	#NUM!	#NUM!	#NUM!	#NUM!
OG0013584	N	N	Y		0	0		NA	NA	NA	NA		NA	NA		0	1	0	0	0	0	0	0	0	0	0	0	0	0	0	1	4	0			-0.267261	3.74166	-0.267261	-0.267261	-0.267261	-0.267261	-0.267261	-0.267261	-0.267261	-0.267261	-0.267261	-0.267261	-0.267261	-0.267261
OG0013592	N	N	Y		0	0		NA	NA	NA	NA		NA	NA		0	0	0	0	0	0	0	0	0	0	0	0	0	0	0	1	5	0			#NUM!	#NUM!	#NUM!	#NUM!	#NUM!	#NUM!	#NUM!	#NUM!	#NUM!	#NUM!	#NUM!	#NUM!	#NUM!	#NUM!
OG0013593	N	N	Y		0	0		NA	NA	NA	NA		NA	NA		0	0	0	0	0	0	5	0	0	0	0	0	0	0	0	1	0	0			-0.267261	-0.267261	-0.267261	-0.267261	-0.267261	-0.267261	3.74166	-0.267261	-0.267261	-0.267261	-0.267261	-0.267261	-0.267261	-0.267261
OG0013601	N	N	Y		0	0		NA	NA	NA	NA		NA	NA		0	0	0	0	0	0	0	0	0	0	0	0	0	0	0	1	1	4			#NUM!	#NUM!	#NUM!	#NUM!	#NUM!	#NUM!	#NUM!	#NUM!	#NUM!	#NUM!	#NUM!	#NUM!	#NUM!	#NUM!
OG0013607	N	N	Y		0	0		NA	NA	NA	NA		NA	NA		0	0	0	0	0	0	0	0	0	0	0	0	0	0	1	1	1	3			-0.267261	-0.267261	-0.267261	-0.267261	-0.267261	-0.267261	-0.267261	-0.267261	-0.267261	-0.267261	-0.267261	-0.267261	-0.267261	-0.267261
OG0013617	N	N	Y		0	0		NA	NA	NA	NA		NA	NA		0	0	6	0	0	0	0	0	0	0	0	0	0	0	0	0	0	0			-0.267261	-0.267261	3.74166	-0.267261	-0.267261	-0.267261	-0.267261	-0.267261	-0.267261	-0.267261	-0.267261	-0.267261	-0.267261	-0.267261
OG0013624	N	N	Y		0	0		NA	NA	NA	NA		NA	NA		0	0	6	0	0	0	0	0	0	0	0	0	0	0	0	0	0	0			-0.267261	-0.267261	3.74166	-0.267261	-0.267261	-0.267261	-0.267261	-0.267261	-0.267261	-0.267261	-0.267261	-0.267261	-0.267261	-0.267261
OG0013632	N	N	Y		0	0		NA	NA	NA	NA		NA	NA		0	0	1	0	0	0	0	0	0	0	0	0	0	0	0	0	0	5			-0.267261	-0.267261	3.74166	-0.267261	-0.267261	-0.267261	-0.267261	-0.267261	-0.267261	-0.267261	-0.267261	-0.267261	-0.267261	-0.267261
OG0013637	N	N	Y		0	0		NA	NA	NA	NA		NA	NA		0	0	6	0	0	0	0	0	0	0	0	0	0	0	0	0	0	0			-0.267261	-0.267261	3.74166	-0.267261	-0.267261	-0.267261	-0.267261	-0.267261	-0.267261	-0.267261	-0.267261	-0.267261	-0.267261	-0.267261
OG0013654	N	N	Y		0	0		NA	NA	NA	NA		NA	NA		0	0	6	0	0	0	0	0	0	0	0	0	0	0	0	0	0	0			-0.267261	-0.267261	3.74166	-0.267261	-0.267261	-0.267261	-0.267261	-0.267261	-0.267261	-0.267261	-0.267261	-0.267261	-0.267261	-0.267261
OG0013683	N	N	Y		0	0		NA	NA	NA	NA		NA	NA		0	0	0	0	0	0	0	0	0	0	0	6	0	0	0	0	0	0			-0.267261	-0.267261	-0.267261	-0.267261	-0.267261	-0.267261	-0.267261	-0.267261	-0.267261	-0.267261	-0.267261	3.74166	-0.267261	-0.267261
OG0013684	N	N	Y		0	0		NA	NA	NA	NA		NA	NA		0	0	0	0	0	0	0	0	0	0	0	6	0	0	0	0	0	0			-0.267261	-0.267261	-0.267261	-0.267261	-0.267261	-0.267261	-0.267261	-0.267261	-0.267261	-0.267261	-0.267261	3.74166	-0.267261	-0.267261
OG0013685	N	N	Y		0	0		NA	NA	NA	NA		NA	NA		0	0	0	0	0	0	0	0	0	0	0	6	0	0	0	0	0	0			-0.267261	-0.267261	-0.267261	-0.267261	-0.267261	-0.267261	-0.267261	-0.267261	-0.267261	-0.267261	-0.267261	3.74166	-0.267261	-0.267261
OG0013689	N	N	Y		0	0		NA	NA	NA	NA		NA	NA		0	0	0	0	0	0	0	0	0	0	0	6	0	0	0	0	0	0			-0.267261	-0.267261	-0.267261	-0.267261	-0.267261	-0.267261	-0.267261	-0.267261	-0.267261	-0.267261	-0.267261	3.74166	-0.267261	-0.267261
OG0013698	N	N	Y		0	0		NA	NA	NA	NA		NA	NA		0	0	0	0	0	0	0	0	0	0	0	6	0	0	0	0	0	0			-0.267261	-0.267261	-0.267261	-0.267261	-0.267261	-0.267261	-0.267261	-0.267261	-0.267261	-0.267261	-0.267261	3.74166	-0.267261	-0.267261
OG0013707	N	N	Y		0	0		NA	NA	NA	NA		NA	NA		0	0	0	0	0	0	0	0	0	0	0	6	0	0	0	0	0	0			-0.267261	-0.267261	-0.267261	-0.267261	-0.267261	-0.267261	-0.267261	-0.267261	-0.267261	-0.267261	-0.267261	3.74166	-0.267261	-0.267261
OG0013721	N	N	Y		0	0		NA	NA	NA	NA		NA	NA		0	0	0	0	0	0	0	0	0	6	0	0	0	0	0	0	0	0			-0.267261	-0.267261	-0.267261	-0.267261	-0.267261	-0.267261	-0.267261	-0.267261	-0.267261	3.74166	-0.267261	-0.267261	-0.267261	-0.267261
OG0013727	N	N	Y		0	0		NA	NA	NA	NA		NA	NA		0	0	0	0	0	0	0	0	0	2	0	0	0	0	0	0	4	0			-0.267261	-0.267261	-0.267261	-0.267261	-0.267261	-0.267261	-0.267261	-0.267261	-0.267261	3.74166	-0.267261	-0.267261	-0.267261	-0.267261
OG0013741	N	N	Y		0	0		NA	NA	NA	NA		NA	NA		0	0	0	0	0	0	0	0	0	6	0	0	0	0	0	0	0	0			-0.267261	-0.267261	-0.267261	-0.267261	-0.267261	-0.267261	-0.267261	-0.267261	-0.267261	3.74166	-0.267261	-0.267261	-0.267261	-0.267261
OG0013743	N	N	Y		0	0		NA	NA	NA	NA		NA	NA		0	0	0	0	0	0	0	0	0	2	0	0	0	0	0	0	4	0			-0.267261	-0.267261	-0.267261	-0.267261	-0.267261	-0.267261	-0.267261	-0.267261	-0.267261	3.74166	-0.267261	-0.267261	-0.267261	-0.267261
OG0013764	N	N	Y		0	0		NA	NA	NA	NA		NA	NA		0	0	0	0	0	0	0	0	0	1	0	0	0	0	0	0	5	0			-0.267261	-0.267261	-0.267261	-0.267261	-0.267261	-0.267261	-0.267261	-0.267261	-0.267261	3.74166	-0.267261	-0.267261	-0.267261	-0.267261
OG0013783	N	N	Y		0	0		NA	NA	NA	NA		NA	NA		0	0	0	0	0	0	0	0	6	0	0	0	0	0	0	0	0	0			-0.267261	-0.267261	-0.267261	-0.267261	-0.267261	-0.267261	-0.267261	-0.267261	3.74166	-0.267261	-0.267261	-0.267261	-0.267261	-0.267261
OG0013789	N	N	Y		0	0		NA	NA	NA	NA		NA	NA		0	0	0	0	0	0	0	0	6	0	0	0	0	0	0	0	0	0			-0.267261	-0.267261	-0.267261	-0.267261	-0.267261	-0.267261	-0.267261	-0.267261	3.74166	-0.267261	-0.267261	-0.267261	-0.267261	-0.267261
OG0013791	N	N	Y		0	0		NA	NA	NA	NA		NA	NA		0	0	0	0	0	0	0	0	6	0	0	0	0	0	0	0	0	0			-0.267261	-0.267261	-0.267261	-0.267261	-0.267261	-0.267261	-0.267261	-0.267261	3.74166	-0.267261	-0.267261	-0.267261	-0.267261	-0.267261
OG0013811	N	N	Y		0	0		NA	NA	NA	NA		NA	NA		0	0	0	0	0	0	0	0	6	0	0	0	0	0	0	0	0	0			-0.267261	-0.267261	-0.267261	-0.267261	-0.267261	-0.267261	-0.267261	-0.267261	3.74166	-0.267261	-0.267261	-0.267261	-0.267261	-0.267261
OG0013819	N	N	Y		0	0		NA	NA	NA	NA		NA	NA		0	0	0	0	0	0	0	0	6	0	0	0	0	0	0	0	0	0			-0.267261	-0.267261	-0.267261	-0.267261	-0.267261	-0.267261	-0.267261	-0.267261	3.74166	-0.267261	-0.267261	-0.267261	-0.267261	-0.267261
OG0013826	N	N	Y		0	0		NA	NA	NA	NA		NA	NA		0	0	0	0	0	0	0	0	1	0	0	0	0	0	0	0	5	0			-0.267261	-0.267261	-0.267261	-0.267261	-0.267261	-0.267261	-0.267261	-0.267261	3.74166	-0.267261	-0.267261	-0.267261	-0.267261	-0.267261
OG0013855	N	N	Y		0	0		NA	NA	NA	NA		NA	NA		0	0	0	0	0	0	0	0	0	0	6	0	0	0	0	0	0	0			-0.267261	-0.267261	-0.267261	-0.267261	-0.267261	-0.267261	-0.267261	-0.267261	-0.267261	-0.267261	3.74166	-0.267261	-0.267261	-0.267261
OG0013856	N	N	Y		0	0		NA	NA	NA	NA		NA	NA		0	0	0	0	0	0	0	0	0	0	6	0	0	0	0	0	0	0			-0.267261	-0.267261	-0.267261	-0.267261	-0.267261	-0.267261	-0.267261	-0.267261	-0.267261	-0.267261	3.74166	-0.267261	-0.267261	-0.267261
OG0013857	N	N	Y		0	0		NA	NA	NA	NA		NA	NA		0	0	0	0	0	0	0	0	0	0	6	0	0	0	0	0	0	0			-0.267261	-0.267261	-0.267261	-0.267261	-0.267261	-0.267261	-0.267261	-0.267261	-0.267261	-0.267261	3.74166	-0.267261	-0.267261	-0.267261
OG0013858	N	N	Y		0	0		NA	NA	NA	NA		NA	NA		0	0	0	0	0	0	0	0	0	0	6	0	0	0	0	0	0	0			-0.267261	-0.267261	-0.267261	-0.267261	-0.267261	-0.267261	-0.267261	-0.267261	-0.267261	-0.267261	3.74166	-0.267261	-0.267261	-0.267261
OG0013859	N	N	Y		0	0		NA	NA	NA	NA		NA	NA		0	0	0	0	0	0	0	0	0	0	6	0	0	0	0	0	0	0			-0.267261	-0.267261	-0.267261	-0.267261	-0.267261	-0.267261	-0.267261	-0.267261	-0.267261	-0.267261	3.74166	-0.267261	-0.267261	-0.267261
OG0013860	N	N	Y		0	0		NA	NA	NA	NA		NA	NA		0	0	0	0	0	0	0	0	0	0	2	0	0	0	0	0	4	0			-0.267261	-0.267261	-0.267261	-0.267261	-0.267261	-0.267261	-0.267261	-0.267261	-0.267261	-0.267261	3.74166	-0.267261	-0.267261	-0.267261
OG0013861	N	N	Y		0	0		NA	NA	NA	NA		NA	NA		0	0	0	0	0	0	0	0	0	0	6	0	0	0	0	0	0	0			-0.267261	-0.267261	-0.267261	-0.267261	-0.267261	-0.267261	-0.267261	-0.267261	-0.267261	-0.267261	3.74166	-0.267261	-0.267261	-0.267261
OG0013862	N	N	Y		0	0		NA	NA	NA	NA		NA	NA		0	0	0	0	0	0	0	0	0	0	6	0	0	0	0	0	0	0			-0.267261	-0.267261	-0.267261	-0.267261	-0.267261	-0.267261	-0.267261	-0.267261	-0.267261	-0.267261	3.74166	-0.267261	-0.267261	-0.267261
OG0013863	N	N	Y		0	0		NA	NA	NA	NA		NA	NA		0	0	0	0	0	0	0	0	0	0	6	0	0	0	0	0	0	0			-0.267261	-0.267261	-0.267261	-0.267261	-0.267261	-0.267261	-0.267261	-0.267261	-0.267261	-0.267261	3.74166	-0.267261	-0.267261	-0.267261
OG0013864	N	N	Y		0	0		NA	NA	NA	NA		NA	NA		0	0	0	0	0	0	0	0	0	0	6	0	0	0	0	0	0	0			-0.267261	-0.267261	-0.267261	-0.267261	-0.267261	-0.267261	-0.267261	-0.267261	-0.267261	-0.267261	3.74166	-0.267261	-0.267261	-0.267261
OG0013865	N	N	Y		0	0		NA	NA	NA	NA		NA	NA		0	0	0	0	0	0	0	0	0	0	6	0	0	0	0	0	0	0			-0.267261	-0.267261	-0.267261	-0.267261	-0.267261	-0.267261	-0.267261	-0.267261	-0.267261	-0.267261	3.74166	-0.267261	-0.267261	-0.267261
OG0013866	N	N	Y		0	0		NA	NA	NA	NA		NA	NA		0	0	0	0	0	0	0	0	0	0	6	0	0	0	0	0	0	0			-0.267261	-0.267261	-0.267261	-0.267261	-0.267261	-0.267261	-0.267261	-0.267261	-0.267261	-0.267261	3.74166	-0.267261	-0.267261	-0.267261
OG0013869	N	N	Y		0	0		NA	NA	NA	NA		NA	NA		0	0	0	0	0	0	0	0	0	0	6	0	0	0	0	0	0	0			-0.267261	-0.267261	-0.267261	-0.267261	-0.267261	-0.267261	-0.267261	-0.267261	-0.267261	-0.267261	3.74166	-0.267261	-0.267261	-0.267261
OG0013870	N	N	Y		0	0		NA	NA	NA	NA		NA	NA		0	0	0	0	0	0	0	0	0	0	6	0	0	0	0	0	0	0			-0.267261	-0.267261	-0.267261	-0.267261	-0.267261	-0.267261	-0.267261	-0.267261	-0.267261	-0.267261	3.74166	-0.267261	-0.267261	-0.267261
OG0013871	N	N	Y		0	0		NA	NA	NA	NA		NA	NA		0	0	0	0	0	0	0	0	0	0	6	0	0	0	0	0	0	0			-0.267261	-0.267261	-0.267261	-0.267261	-0.267261	-0.267261	-0.267261	-0.267261	-0.267261	-0.267261	3.74166	-0.267261	-0.267261	-0.267261
OG0013872	N	N	Y		0	0		NA	NA	NA	NA		NA	NA		0	0	0	0	0	0	0	0	0	0	6	0	0	0	0	0	0	0			-0.267261	-0.267261	-0.267261	-0.267261	-0.267261	-0.267261	-0.267261	-0.267261	-0.267261	-0.267261	3.74166	-0.267261	-0.267261	-0.267261
OG0013873	N	N	Y		0	0		NA	NA	NA	NA		NA	NA		0	0	0	0	0	0	0	0	0	0	6	0	0	0	0	0	0	0			-0.267261	-0.267261	-0.267261	-0.267261	-0.267261	-0.267261	-0.267261	-0.267261	-0.267261	-0.267261	3.74166	-0.267261	-0.267261	-0.267261
OG0013874	N	N	Y		0	0		NA	NA	NA	NA		NA	NA		0	0	0	0	0	0	0	0	0	0	6	0	0	0	0	0	0	0			-0.267261	-0.267261	-0.267261	-0.267261	-0.267261	-0.267261	-0.267261	-0.267261	-0.267261	-0.267261	3.74166	-0.267261	-0.267261	-0.267261
OG0013876	N	N	Y		0	0		NA	NA	NA	NA		NA	NA		0	0	0	0	0	0	0	0	0	0	6	0	0	0	0	0	0	0			-0.267261	-0.267261	-0.267261	-0.267261	-0.267261	-0.267261	-0.267261	-0.267261	-0.267261	-0.267261	3.74166	-0.267261	-0.267261	-0.267261
OG0013884	N	N	Y		0	0		NA	NA	NA	NA		NA	NA		0	6	0	0	0	0	0	0	0	0	0	0	0	0	0	0	0	0			-0.267261	3.74166	-0.267261	-0.267261	-0.267261	-0.267261	-0.267261	-0.267261	-0.267261	-0.267261	-0.267261	-0.267261	-0.267261	-0.267261
OG0013886	N	N	Y		0	0		NA	NA	NA	NA		NA	NA		0	6	0	0	0	0	0	0	0	0	0	0	0	0	0	0	0	0			-0.267261	3.74166	-0.267261	-0.267261	-0.267261	-0.267261	-0.267261	-0.267261	-0.267261	-0.267261	-0.267261	-0.267261	-0.267261	-0.267261
OG0013889	N	N	Y		0	0		NA	NA	NA	NA		NA	NA		0	6	0	0	0	0	0	0	0	0	0	0	0	0	0	0	0	0			-0.267261	3.74166	-0.267261	-0.267261	-0.267261	-0.267261	-0.267261	-0.267261	-0.267261	-0.267261	-0.267261	-0.267261	-0.267261	-0.267261
OG0013900	N	N	Y		0	0		NA	NA	NA	NA		NA	NA		0	6	0	0	0	0	0	0	0	0	0	0	0	0	0	0	0	0			-0.267261	3.74166	-0.267261	-0.267261	-0.267261	-0.267261	-0.267261	-0.267261	-0.267261	-0.267261	-0.267261	-0.267261	-0.267261	-0.267261
OG0013919	N	N	Y		0	0		NA	NA	NA	NA		NA	NA		0	0	0	0	0	6	0	0	0	0	0	0	0	0	0	0	0	0			-0.267261	-0.267261	-0.267261	-0.267261	-0.267261	3.74166	-0.267261	-0.267261	-0.267261	-0.267261	-0.267261	-0.267261	-0.267261	-0.267261
OG0013921	N	N	Y		0	0		NA	NA	NA	NA		NA	NA		0	0	0	0	0	6	0	0	0	0	0	0	0	0	0	0	0	0			-0.267261	-0.267261	-0.267261	-0.267261	-0.267261	3.74166	-0.267261	-0.267261	-0.267261	-0.267261	-0.267261	-0.267261	-0.267261	-0.267261
OG0013923	N	N	Y		0	0		NA	NA	NA	NA		NA	NA		0	0	0	0	0	6	0	0	0	0	0	0	0	0	0	0	0	0			-0.267261	-0.267261	-0.267261	-0.267261	-0.267261	3.74166	-0.267261	-0.267261	-0.267261	-0.267261	-0.267261	-0.267261	-0.267261	-0.267261
OG0013924	N	N	Y		0	0		NA	NA	NA	NA		NA	NA		0	0	0	0	0	6	0	0	0	0	0	0	0	0	0	0	0	0			-0.267261	-0.267261	-0.267261	-0.267261	-0.267261	3.74166	-0.267261	-0.267261	-0.267261	-0.267261	-0.267261	-0.267261	-0.267261	-0.267261
OG0013927	N	N	Y		0	0		NA	NA	NA	NA		NA	NA		0	0	0	0	0	6	0	0	0	0	0	0	0	0	0	0	0	0			-0.267261	-0.267261	-0.267261	-0.267261	-0.267261	3.74166	-0.267261	-0.267261	-0.267261	-0.267261	-0.267261	-0.267261	-0.267261	-0.267261
OG0013934	N	N	Y		0	0		NA	NA	NA	NA		NA	NA		0	0	0	0	0	6	0	0	0	0	0	0	0	0	0	0	0	0			-0.267261	-0.267261	-0.267261	-0.267261	-0.267261	3.74166	-0.267261	-0.267261	-0.267261	-0.267261	-0.267261	-0.267261	-0.267261	-0.267261
OG0013936	N	N	Y		0	0		NA	NA	NA	NA		NA	NA		0	0	0	0	0	6	0	0	0	0	0	0	0	0	0	0	0	0			-0.267261	-0.267261	-0.267261	-0.267261	-0.267261	3.74166	-0.267261	-0.267261	-0.267261	-0.267261	-0.267261	-0.267261	-0.267261	-0.267261
OG0013940	N	N	Y		0	0		NA	NA	NA	NA		NA	NA		0	0	0	0	0	0	0	0	0	0	0	0	0	0	0	0	6	0			#NUM!	#NUM!	#NUM!	#NUM!	#NUM!	#NUM!	#NUM!	#NUM!	#NUM!	#NUM!	#NUM!	#NUM!	#NUM!	#NUM!
OG0013941	N	N	Y		0	0		NA	NA	NA	NA		NA	NA		0	0	0	0	0	0	0	0	0	0	0	0	0	0	0	0	6	0			#NUM!	#NUM!	#NUM!	#NUM!	#NUM!	#NUM!	#NUM!	#NUM!	#NUM!	#NUM!	#NUM!	#NUM!	#NUM!	#NUM!
OG0013942	N	N	Y		0	0		NA	NA	NA	NA		NA	NA		0	0	0	0	0	0	0	0	0	0	0	0	0	0	0	0	6	0			#NUM!	#NUM!	#NUM!	#NUM!	#NUM!	#NUM!	#NUM!	#NUM!	#NUM!	#NUM!	#NUM!	#NUM!	#NUM!	#NUM!
OG0013943	N	N	Y		0	0		NA	NA	NA	NA		NA	NA		0	0	0	0	0	0	0	0	0	0	0	0	0	0	0	0	6	0			#NUM!	#NUM!	#NUM!	#NUM!	#NUM!	#NUM!	#NUM!	#NUM!	#NUM!	#NUM!	#NUM!	#NUM!	#NUM!	#NUM!
OG0013944	N	N	Y		0	0		NA	NA	NA	NA		NA	NA		0	0	0	0	0	0	0	0	0	0	0	0	0	0	0	0	6	0			#NUM!	#NUM!	#NUM!	#NUM!	#NUM!	#NUM!	#NUM!	#NUM!	#NUM!	#NUM!	#NUM!	#NUM!	#NUM!	#NUM!
OG0013946	N	N	Y		0	0		NA	NA	NA	NA		NA	NA		0	0	0	0	0	0	0	0	0	0	0	0	0	0	0	0	6	0			#NUM!	#NUM!	#NUM!	#NUM!	#NUM!	#NUM!	#NUM!	#NUM!	#NUM!	#NUM!	#NUM!	#NUM!	#NUM!	#NUM!
OG0013947	N	N	Y		0	0		NA	NA	NA	NA		NA	NA		0	0	0	0	0	0	0	4	0	0	0	0	0	0	0	0	2	0			-0.267261	-0.267261	-0.267261	-0.267261	-0.267261	-0.267261	-0.267261	3.74166	-0.267261	-0.267261	-0.267261	-0.267261	-0.267261	-0.267261
OG0013948	N	N	Y		0	0		NA	NA	NA	NA		NA	NA		0	0	0	0	0	0	0	0	0	0	0	0	0	0	0	0	5	1			#NUM!	#NUM!	#NUM!	#NUM!	#NUM!	#NUM!	#NUM!	#NUM!	#NUM!	#NUM!	#NUM!	#NUM!	#NUM!	#NUM!
OG0013949	N	N	Y		0	0		NA	NA	NA	NA		NA	NA		0	0	0	0	0	0	0	0	0	0	0	0	0	0	0	0	6	0			#NUM!	#NUM!	#NUM!	#NUM!	#NUM!	#NUM!	#NUM!	#NUM!	#NUM!	#NUM!	#NUM!	#NUM!	#NUM!	#NUM!
OG0013951	N	N	Y		0	0		NA	NA	NA	NA		NA	NA		0	0	0	0	0	0	0	0	0	0	0	0	0	0	0	0	6	0			#NUM!	#NUM!	#NUM!	#NUM!	#NUM!	#NUM!	#NUM!	#NUM!	#NUM!	#NUM!	#NUM!	#NUM!	#NUM!	#NUM!
OG0013953	N	N	Y		0	0		NA	NA	NA	NA		NA	NA		0	0	0	0	6	0	0	0	0	0	0	0	0	0	0	0	0	0			-0.267261	-0.267261	-0.267261	-0.267261	3.74166	-0.267261	-0.267261	-0.267261	-0.267261	-0.267261	-0.267261	-0.267261	-0.267261	-0.267261
OG0013954	N	N	Y		0	0		NA	NA	NA	NA		NA	NA		0	0	0	0	6	0	0	0	0	0	0	0	0	0	0	0	0	0			-0.267261	-0.267261	-0.267261	-0.267261	3.74166	-0.267261	-0.267261	-0.267261	-0.267261	-0.267261	-0.267261	-0.267261	-0.267261	-0.267261
OG0013956	N	N	Y		0	0		NA	NA	NA	NA		NA	NA		0	0	0	0	6	0	0	0	0	0	0	0	0	0	0	0	0	0			-0.267261	-0.267261	-0.267261	-0.267261	3.74166	-0.267261	-0.267261	-0.267261	-0.267261	-0.267261	-0.267261	-0.267261	-0.267261	-0.267261
OG0013957	N	N	Y		0	0		NA	NA	NA	NA		NA	NA		0	0	0	0	6	0	0	0	0	0	0	0	0	0	0	0	0	0			-0.267261	-0.267261	-0.267261	-0.267261	3.74166	-0.267261	-0.267261	-0.267261	-0.267261	-0.267261	-0.267261	-0.267261	-0.267261	-0.267261
OG0013965	N	N	Y		0	0		NA	NA	NA	NA		NA	NA		0	0	0	0	0	0	0	0	0	0	0	0	0	6	0	0	0	0			-0.267261	-0.267261	-0.267261	-0.267261	-0.267261	-0.267261	-0.267261	-0.267261	-0.267261	-0.267261	-0.267261	-0.267261	-0.267261	3.74166
OG0014074	N	N	Y		0	0		NA	NA	NA	NA		NA	NA		6	0	0	0	0	0	0	0	0	0	0	0	0	0	0	0	0	0			3.74166	-0.267261	-0.267261	-0.267261	-0.267261	-0.267261	-0.267261	-0.267261	-0.267261	-0.267261	-0.267261	-0.267261	-0.267261	-0.267261
OG0014075	N	N	Y		0	0		NA	NA	NA	NA		NA	NA		6	0	0	0	0	0	0	0	0	0	0	0	0	0	0	0	0	0			3.74166	-0.267261	-0.267261	-0.267261	-0.267261	-0.267261	-0.267261	-0.267261	-0.267261	-0.267261	-0.267261	-0.267261	-0.267261	-0.267261
OG0014076	N	N	Y		0	0		NA	NA	NA	NA		NA	NA		6	0	0	0	0	0	0	0	0	0	0	0	0	0	0	0	0	0			3.74166	-0.267261	-0.267261	-0.267261	-0.267261	-0.267261	-0.267261	-0.267261	-0.267261	-0.267261	-0.267261	-0.267261	-0.267261	-0.267261
OG0014078	N	N	Y		0	0		NA	NA	NA	NA		NA	NA		0	0	0	0	0	0	0	0	0	0	0	0	0	0	0	0	0	6			#NUM!	#NUM!	#NUM!	#NUM!	#NUM!	#NUM!	#NUM!	#NUM!	#NUM!	#NUM!	#NUM!	#NUM!	#NUM!	#NUM!
OG0014079	N	N	Y		0	0		NA	NA	NA	NA		NA	NA		0	0	0	0	0	0	0	0	0	0	0	0	0	0	0	0	0	6			#NUM!	#NUM!	#NUM!	#NUM!	#NUM!	#NUM!	#NUM!	#NUM!	#NUM!	#NUM!	#NUM!	#NUM!	#NUM!	#NUM!
OG0014080	N	N	Y		0	0		NA	NA	NA	NA		NA	NA		0	0	0	0	0	0	0	0	0	0	0	0	0	0	0	0	0	6			#NUM!	#NUM!	#NUM!	#NUM!	#NUM!	#NUM!	#NUM!	#NUM!	#NUM!	#NUM!	#NUM!	#NUM!	#NUM!	#NUM!
OG0014081	N	N	Y		0	0		NA	NA	NA	NA		NA	NA		0	0	0	0	0	0	0	0	0	0	0	0	0	0	0	0	0	6			#NUM!	#NUM!	#NUM!	#NUM!	#NUM!	#NUM!	#NUM!	#NUM!	#NUM!	#NUM!	#NUM!	#NUM!	#NUM!	#NUM!
OG0014082	N	N	Y		0	0		NA	NA	NA	NA		NA	NA		0	0	0	0	0	0	0	0	0	0	0	0	0	0	0	0	0	6			#NUM!	#NUM!	#NUM!	#NUM!	#NUM!	#NUM!	#NUM!	#NUM!	#NUM!	#NUM!	#NUM!	#NUM!	#NUM!	#NUM!
OG0014083	N	N	Y		0	0		NA	NA	NA	NA		NA	NA		0	0	0	0	0	0	0	0	0	0	0	0	0	0	0	0	0	6			#NUM!	#NUM!	#NUM!	#NUM!	#NUM!	#NUM!	#NUM!	#NUM!	#NUM!	#NUM!	#NUM!	#NUM!	#NUM!	#NUM!
OG0014084	N	N	Y		0	0		NA	NA	NA	NA		NA	NA		0	0	0	0	0	0	0	0	0	0	0	0	0	0	0	0	0	6			#NUM!	#NUM!	#NUM!	#NUM!	#NUM!	#NUM!	#NUM!	#NUM!	#NUM!	#NUM!	#NUM!	#NUM!	#NUM!	#NUM!
OG0014085	N	N	Y		0	0		NA	NA	NA	NA		NA	NA		0	0	0	0	0	0	0	0	0	0	0	0	0	0	0	0	0	6			#NUM!	#NUM!	#NUM!	#NUM!	#NUM!	#NUM!	#NUM!	#NUM!	#NUM!	#NUM!	#NUM!	#NUM!	#NUM!	#NUM!
OG0014086	N	N	Y		0	0		NA	NA	NA	NA		NA	NA		0	0	0	0	0	0	0	4	0	0	0	0	0	0	0	0	0	2			-0.267261	-0.267261	-0.267261	-0.267261	-0.267261	-0.267261	-0.267261	3.74166	-0.267261	-0.267261	-0.267261	-0.267261	-0.267261	-0.267261
OG0014087	N	N	Y		0	0		NA	NA	NA	NA		NA	NA		0	0	0	0	0	0	0	0	0	0	0	0	0	0	0	0	0	6			#NUM!	#NUM!	#NUM!	#NUM!	#NUM!	#NUM!	#NUM!	#NUM!	#NUM!	#NUM!	#NUM!	#NUM!	#NUM!	#NUM!
OG0014088	N	N	Y		0	0		NA	NA	NA	NA		NA	NA		0	0	0	0	0	0	0	0	0	0	0	0	0	0	0	0	0	6			#NUM!	#NUM!	#NUM!	#NUM!	#NUM!	#NUM!	#NUM!	#NUM!	#NUM!	#NUM!	#NUM!	#NUM!	#NUM!	#NUM!
OG0014089	N	N	Y		0	0		NA	NA	NA	NA		NA	NA		0	0	0	0	0	0	0	0	0	0	0	0	0	0	1	0	0	5			-0.267261	-0.267261	-0.267261	-0.267261	-0.267261	-0.267261	-0.267261	-0.267261	-0.267261	-0.267261	-0.267261	-0.267261	-0.267261	-0.267261
OG0014090	N	N	Y		0	0		NA	NA	NA	NA		NA	NA		0	0	0	0	0	0	0	6	0	0	0	0	0	0	0	0	0	0			-0.267261	-0.267261	-0.267261	-0.267261	-0.267261	-0.267261	-0.267261	3.74166	-0.267261	-0.267261	-0.267261	-0.267261	-0.267261	-0.267261
OG0014091	N	N	Y		0	0		NA	NA	NA	NA		NA	NA		0	0	0	0	0	0	0	6	0	0	0	0	0	0	0	0	0	0			-0.267261	-0.267261	-0.267261	-0.267261	-0.267261	-0.267261	-0.267261	3.74166	-0.267261	-0.267261	-0.267261	-0.267261	-0.267261	-0.267261
OG0014100	N	N	Y		0	0		NA	NA	NA	NA		NA	NA		0	0	0	0	0	0	0	0	0	0	0	0	5	0	0	0	0	0			-0.267261	-0.267261	-0.267261	-0.267261	-0.267261	-0.267261	-0.267261	-0.267261	-0.267261	-0.267261	-0.267261	-0.267261	3.74166	-0.267261
OG0014110	N	N	Y		0	0		NA	NA	NA	NA		NA	NA		0	0	0	0	0	0	0	0	0	0	0	0	5	0	0	0	0	0			-0.267261	-0.267261	-0.267261	-0.267261	-0.267261	-0.267261	-0.267261	-0.267261	-0.267261	-0.267261	-0.267261	-0.267261	3.74166	-0.267261
OG0014132	N	N	Y		0	0		NA	NA	NA	NA		NA	NA		0	0	0	0	0	0	0	0	0	0	0	0	5	0	0	0	0	0			-0.267261	-0.267261	-0.267261	-0.267261	-0.267261	-0.267261	-0.267261	-0.267261	-0.267261	-0.267261	-0.267261	-0.267261	3.74166	-0.267261
OG0014147	N	N	Y		0	0		NA	NA	NA	NA		NA	NA		0	0	0	0	0	0	0	0	0	0	0	0	5	0	0	0	0	0			-0.267261	-0.267261	-0.267261	-0.267261	-0.267261	-0.267261	-0.267261	-0.267261	-0.267261	-0.267261	-0.267261	-0.267261	3.74166	-0.267261
OG0014149	N	N	Y		0	0		NA	NA	NA	NA		NA	NA		0	0	0	0	0	0	0	0	0	0	0	0	2	0	0	0	0	3			-0.267261	-0.267261	-0.267261	-0.267261	-0.267261	-0.267261	-0.267261	-0.267261	-0.267261	-0.267261	-0.267261	-0.267261	3.74166	-0.267261
OG0014155	N	N	Y		0	0		NA	NA	NA	NA		NA	NA		0	0	0	0	0	0	0	0	0	0	0	0	1	0	0	0	1	3			-0.267261	-0.267261	-0.267261	-0.267261	-0.267261	-0.267261	-0.267261	-0.267261	-0.267261	-0.267261	-0.267261	-0.267261	3.74166	-0.267261
OG0014167	N	N	Y		0	0		NA	NA	NA	NA		NA	NA		0	0	0	0	0	0	0	0	0	0	0	0	5	0	0	0	0	0			-0.267261	-0.267261	-0.267261	-0.267261	-0.267261	-0.267261	-0.267261	-0.267261	-0.267261	-0.267261	-0.267261	-0.267261	3.74166	-0.267261
OG0014239	N	N	Y		0	0		NA	NA	NA	NA		NA	NA		0	0	0	1	0	0	0	0	0	0	0	0	0	0	0	4	0	0			-0.267261	-0.267261	-0.267261	3.74166	-0.267261	-0.267261	-0.267261	-0.267261	-0.267261	-0.267261	-0.267261	-0.267261	-0.267261	-0.267261
OG0014245	N	N	Y		0	0		NA	NA	NA	NA		NA	NA		0	0	0	5	0	0	0	0	0	0	0	0	0	0	0	0	0	0			-0.267261	-0.267261	-0.267261	3.74166	-0.267261	-0.267261	-0.267261	-0.267261	-0.267261	-0.267261	-0.267261	-0.267261	-0.267261	-0.267261
OG0014305	N	N	Y		0	0		NA	NA	NA	NA		NA	NA		0	0	0	5	0	0	0	0	0	0	0	0	0	0	0	0	0	0			-0.267261	-0.267261	-0.267261	3.74166	-0.267261	-0.267261	-0.267261	-0.267261	-0.267261	-0.267261	-0.267261	-0.267261	-0.267261	-0.267261
OG0014313	N	N	Y		0	0		NA	NA	NA	NA		NA	NA		0	0	0	5	0	0	0	0	0	0	0	0	0	0	0	0	0	0			-0.267261	-0.267261	-0.267261	3.74166	-0.267261	-0.267261	-0.267261	-0.267261	-0.267261	-0.267261	-0.267261	-0.267261	-0.267261	-0.267261
OG0014478	N	N	Y		0	0		NA	NA	NA	NA		NA	NA		0	0	0	0	0	2	0	0	0	0	0	0	0	0	0	3	0	0			-0.267261	-0.267261	-0.267261	-0.267261	-0.267261	3.74166	-0.267261	-0.267261	-0.267261	-0.267261	-0.267261	-0.267261	-0.267261	-0.267261
OG0014480	N	N	Y		0	0		NA	NA	NA	NA		NA	NA		0	0	0	0	0	0	0	0	0	3	0	0	0	0	0	1	0	1			-0.267261	-0.267261	-0.267261	-0.267261	-0.267261	-0.267261	-0.267261	-0.267261	-0.267261	3.74166	-0.267261	-0.267261	-0.267261	-0.267261
OG0014481	N	N	Y		0	0		NA	NA	NA	NA		NA	NA		0	0	0	0	0	0	0	0	0	1	0	0	0	0	0	4	0	0			-0.267261	-0.267261	-0.267261	-0.267261	-0.267261	-0.267261	-0.267261	-0.267261	-0.267261	3.74166	-0.267261	-0.267261	-0.267261	-0.267261
OG0014482	N	N	Y		0	0		NA	NA	NA	NA		NA	NA		0	0	0	0	0	0	0	0	0	0	0	0	0	0	0	5	0	0			#NUM!	#NUM!	#NUM!	#NUM!	#NUM!	#NUM!	#NUM!	#NUM!	#NUM!	#NUM!	#NUM!	#NUM!	#NUM!	#NUM!
OG0014484	N	N	Y		0	0		NA	NA	NA	NA		NA	NA		1	0	0	0	0	0	0	0	0	0	0	0	0	0	0	4	0	0			3.74166	-0.267261	-0.267261	-0.267261	-0.267261	-0.267261	-0.267261	-0.267261	-0.267261	-0.267261	-0.267261	-0.267261	-0.267261	-0.267261
OG0014490	N	N	Y		0	0		NA	NA	NA	NA		NA	NA		0	0	0	0	0	0	0	0	0	0	0	0	0	0	0	5	0	0			#NUM!	#NUM!	#NUM!	#NUM!	#NUM!	#NUM!	#NUM!	#NUM!	#NUM!	#NUM!	#NUM!	#NUM!	#NUM!	#NUM!
OG0014492	N	N	Y		0	0		NA	NA	NA	NA		NA	NA		0	0	0	0	0	3	0	0	0	0	0	0	0	0	0	1	0	1			-0.267261	-0.267261	-0.267261	-0.267261	-0.267261	3.74166	-0.267261	-0.267261	-0.267261	-0.267261	-0.267261	-0.267261	-0.267261	-0.267261
OG0014493	N	N	Y		0	0		NA	NA	NA	NA		NA	NA		0	0	0	0	0	0	0	0	0	0	0	0	0	0	0	2	3	0			#NUM!	#NUM!	#NUM!	#NUM!	#NUM!	#NUM!	#NUM!	#NUM!	#NUM!	#NUM!	#NUM!	#NUM!	#NUM!	#NUM!
OG0014497	N	N	Y		0	0		NA	NA	NA	NA		NA	NA		0	0	1	0	0	0	0	0	0	0	0	0	0	0	0	4	0	0			-0.267261	-0.267261	3.74166	-0.267261	-0.267261	-0.267261	-0.267261	-0.267261	-0.267261	-0.267261	-0.267261	-0.267261	-0.267261	-0.267261
OG0014499	N	N	Y		0	0		NA	NA	NA	NA		NA	NA		0	0	0	0	0	0	0	0	0	0	0	0	0	0	0	2	3	0			#NUM!	#NUM!	#NUM!	#NUM!	#NUM!	#NUM!	#NUM!	#NUM!	#NUM!	#NUM!	#NUM!	#NUM!	#NUM!	#NUM!
OG0014506	N	N	Y		0	0		NA	NA	NA	NA		NA	NA		0	0	0	0	0	0	0	0	0	0	0	0	0	0	0	3	2	0			#NUM!	#NUM!	#NUM!	#NUM!	#NUM!	#NUM!	#NUM!	#NUM!	#NUM!	#NUM!	#NUM!	#NUM!	#NUM!	#NUM!
OG0014507	N	N	Y		0	0		NA	NA	NA	NA		NA	NA		0	0	0	0	0	0	0	0	0	0	0	0	0	0	0	2	3	0			#NUM!	#NUM!	#NUM!	#NUM!	#NUM!	#NUM!	#NUM!	#NUM!	#NUM!	#NUM!	#NUM!	#NUM!	#NUM!	#NUM!
OG0014509	N	N	Y		0	0		NA	NA	NA	NA		NA	NA		0	0	0	0	0	0	0	0	0	0	0	0	0	0	0	4	1	0			#NUM!	#NUM!	#NUM!	#NUM!	#NUM!	#NUM!	#NUM!	#NUM!	#NUM!	#NUM!	#NUM!	#NUM!	#NUM!	#NUM!
OG0014511	N	N	Y		0	0		NA	NA	NA	NA		NA	NA		0	0	0	0	0	0	0	0	0	1	0	0	0	0	0	4	0	0			-0.267261	-0.267261	-0.267261	-0.267261	-0.267261	-0.267261	-0.267261	-0.267261	-0.267261	3.74166	-0.267261	-0.267261	-0.267261	-0.267261
OG0014517	N	N	Y		0	0		NA	NA	NA	NA		NA	NA		0	0	0	0	0	0	0	0	0	0	0	0	0	0	0	5	0	0			#NUM!	#NUM!	#NUM!	#NUM!	#NUM!	#NUM!	#NUM!	#NUM!	#NUM!	#NUM!	#NUM!	#NUM!	#NUM!	#NUM!
OG0014518	N	N	Y		0	0		NA	NA	NA	NA		NA	NA		0	0	0	0	0	0	0	0	1	0	0	0	0	0	0	4	0	0			-0.267261	-0.267261	-0.267261	-0.267261	-0.267261	-0.267261	-0.267261	-0.267261	3.74166	-0.267261	-0.267261	-0.267261	-0.267261	-0.267261
OG0014529	N	N	Y		0	0		NA	NA	NA	NA		NA	NA		0	0	0	0	0	0	0	0	0	0	0	0	0	0	0	2	3	0			#NUM!	#NUM!	#NUM!	#NUM!	#NUM!	#NUM!	#NUM!	#NUM!	#NUM!	#NUM!	#NUM!	#NUM!	#NUM!	#NUM!
OG0014530	N	N	Y		0	0		NA	NA	NA	NA		NA	NA		0	0	0	0	0	0	0	0	0	0	0	0	0	0	0	4	1	0			#NUM!	#NUM!	#NUM!	#NUM!	#NUM!	#NUM!	#NUM!	#NUM!	#NUM!	#NUM!	#NUM!	#NUM!	#NUM!	#NUM!
OG0014541	N	N	Y		0	0		NA	NA	NA	NA		NA	NA		0	0	0	0	0	2	0	0	0	0	0	0	0	0	0	2	1	0			-0.267261	-0.267261	-0.267261	-0.267261	-0.267261	3.74166	-0.267261	-0.267261	-0.267261	-0.267261	-0.267261	-0.267261	-0.267261	-0.267261
OG0014546	N	N	Y		0	0		NA	NA	NA	NA		NA	NA		0	0	0	0	0	0	0	0	0	0	0	0	0	0	0	1	1	3			#NUM!	#NUM!	#NUM!	#NUM!	#NUM!	#NUM!	#NUM!	#NUM!	#NUM!	#NUM!	#NUM!	#NUM!	#NUM!	#NUM!
OG0014548	N	N	Y		0	0		NA	NA	NA	NA		NA	NA		0	0	0	0	1	0	0	0	0	0	0	0	0	0	0	1	3	0			-0.267261	-0.267261	-0.267261	-0.267261	3.74166	-0.267261	-0.267261	-0.267261	-0.267261	-0.267261	-0.267261	-0.267261	-0.267261	-0.267261
OG0014552	N	N	Y		0	0		NA	NA	NA	NA		NA	NA		1	0	0	0	0	0	0	0	0	0	0	0	0	0	0	1	1	2			3.74166	-0.267261	-0.267261	-0.267261	-0.267261	-0.267261	-0.267261	-0.267261	-0.267261	-0.267261	-0.267261	-0.267261	-0.267261	-0.267261
OG0014553	N	N	Y		0	0		NA	NA	NA	NA		NA	NA		0	0	0	0	0	0	0	0	0	3	0	0	0	0	0	1	1	0			-0.267261	-0.267261	-0.267261	-0.267261	-0.267261	-0.267261	-0.267261	-0.267261	-0.267261	3.74166	-0.267261	-0.267261	-0.267261	-0.267261
OG0014562	N	N	Y		0	0		NA	NA	NA	NA		NA	NA		0	0	0	0	0	0	0	0	0	0	0	0	0	0	0	1	4	0			#NUM!	#NUM!	#NUM!	#NUM!	#NUM!	#NUM!	#NUM!	#NUM!	#NUM!	#NUM!	#NUM!	#NUM!	#NUM!	#NUM!
OG0014566	N	N	Y		0	0		NA	NA	NA	NA		NA	NA		0	0	4	0	0	0	0	0	0	0	0	0	0	0	0	1	0	0			-0.267261	-0.267261	3.74166	-0.267261	-0.267261	-0.267261	-0.267261	-0.267261	-0.267261	-0.267261	-0.267261	-0.267261	-0.267261	-0.267261
OG0014570	N	N	Y		0	0		NA	NA	NA	NA		NA	NA		0	0	0	0	0	0	0	0	0	0	0	0	0	0	0	2	3	0			#NUM!	#NUM!	#NUM!	#NUM!	#NUM!	#NUM!	#NUM!	#NUM!	#NUM!	#NUM!	#NUM!	#NUM!	#NUM!	#NUM!
OG0014575	N	N	Y		0	0		NA	NA	NA	NA		NA	NA		0	0	0	0	0	4	0	0	0	0	0	0	0	0	0	1	0	0			-0.267261	-0.267261	-0.267261	-0.267261	-0.267261	3.74166	-0.267261	-0.267261	-0.267261	-0.267261	-0.267261	-0.267261	-0.267261	-0.267261
OG0014576	N	N	Y		0	0		NA	NA	NA	NA		NA	NA		0	0	0	0	0	0	0	0	0	1	0	0	0	0	0	1	3	0			-0.267261	-0.267261	-0.267261	-0.267261	-0.267261	-0.267261	-0.267261	-0.267261	-0.267261	3.74166	-0.267261	-0.267261	-0.267261	-0.267261
OG0014577	N	N	Y		0	0		NA	NA	NA	NA		NA	NA		0	0	0	0	0	0	0	0	0	0	0	0	0	0	0	1	0	4			#NUM!	#NUM!	#NUM!	#NUM!	#NUM!	#NUM!	#NUM!	#NUM!	#NUM!	#NUM!	#NUM!	#NUM!	#NUM!	#NUM!
OG0014584	N	N	Y		0	0		NA	NA	NA	NA		NA	NA		0	0	0	0	0	0	0	0	0	0	0	0	0	0	0	1	0	4			#NUM!	#NUM!	#NUM!	#NUM!	#NUM!	#NUM!	#NUM!	#NUM!	#NUM!	#NUM!	#NUM!	#NUM!	#NUM!	#NUM!
OG0014585	N	N	Y		0	0		NA	NA	NA	NA		NA	NA		0	0	0	0	0	0	0	2	0	0	0	0	0	0	0	1	0	2			-0.267261	-0.267261	-0.267261	-0.267261	-0.267261	-0.267261	-0.267261	3.74166	-0.267261	-0.267261	-0.267261	-0.267261	-0.267261	-0.267261
OG0014586	N	N	Y		0	0		NA	NA	NA	NA		NA	NA		0	0	0	0	0	0	0	0	0	4	0	0	0	0	0	1	0	0			-0.267261	-0.267261	-0.267261	-0.267261	-0.267261	-0.267261	-0.267261	-0.267261	-0.267261	3.74166	-0.267261	-0.267261	-0.267261	-0.267261
OG0014598	N	N	Y		0	0		NA	NA	NA	NA		NA	NA		0	0	0	0	0	1	0	0	0	0	0	0	0	0	0	1	3	0			-0.267261	-0.267261	-0.267261	-0.267261	-0.267261	3.74166	-0.267261	-0.267261	-0.267261	-0.267261	-0.267261	-0.267261	-0.267261	-0.267261
OG0014600	N	N	Y		0	0		NA	NA	NA	NA		NA	NA		0	0	0	0	0	0	0	0	0	2	0	0	0	0	0	1	2	0			-0.267261	-0.267261	-0.267261	-0.267261	-0.267261	-0.267261	-0.267261	-0.267261	-0.267261	3.74166	-0.267261	-0.267261	-0.267261	-0.267261
OG0014626	N	N	Y		0	0		NA	NA	NA	NA		NA	NA		0	0	4	0	0	0	0	0	0	0	0	0	0	0	0	0	1	0			-0.267261	-0.267261	3.74166	-0.267261	-0.267261	-0.267261	-0.267261	-0.267261	-0.267261	-0.267261	-0.267261	-0.267261	-0.267261	-0.267261
OG0014635	N	N	Y		0	0		NA	NA	NA	NA		NA	NA		0	0	5	0	0	0	0	0	0	0	0	0	0	0	0	0	0	0			-0.267261	-0.267261	3.74166	-0.267261	-0.267261	-0.267261	-0.267261	-0.267261	-0.267261	-0.267261	-0.267261	-0.267261	-0.267261	-0.267261
OG0014643	N	N	Y		0	0		NA	NA	NA	NA		NA	NA		0	0	5	0	0	0	0	0	0	0	0	0	0	0	0	0	0	0			-0.267261	-0.267261	3.74166	-0.267261	-0.267261	-0.267261	-0.267261	-0.267261	-0.267261	-0.267261	-0.267261	-0.267261	-0.267261	-0.267261
OG0014645	N	N	Y		0	0		NA	NA	NA	NA		NA	NA		0	0	5	0	0	0	0	0	0	0	0	0	0	0	0	0	0	0			-0.267261	-0.267261	3.74166	-0.267261	-0.267261	-0.267261	-0.267261	-0.267261	-0.267261	-0.267261	-0.267261	-0.267261	-0.267261	-0.267261
OG0014648	N	N	Y		0	0		NA	NA	NA	NA		NA	NA		0	0	5	0	0	0	0	0	0	0	0	0	0	0	0	0	0	0			-0.267261	-0.267261	3.74166	-0.267261	-0.267261	-0.267261	-0.267261	-0.267261	-0.267261	-0.267261	-0.267261	-0.267261	-0.267261	-0.267261
OG0014656	N	N	Y		0	0		NA	NA	NA	NA		NA	NA		0	0	4	0	0	0	0	0	0	0	0	0	0	0	0	0	1	0			-0.267261	-0.267261	3.74166	-0.267261	-0.267261	-0.267261	-0.267261	-0.267261	-0.267261	-0.267261	-0.267261	-0.267261	-0.267261	-0.267261
OG0014662	N	N	Y		0	0		NA	NA	NA	NA		NA	NA		0	0	5	0	0	0	0	0	0	0	0	0	0	0	0	0	0	0			-0.267261	-0.267261	3.74166	-0.267261	-0.267261	-0.267261	-0.267261	-0.267261	-0.267261	-0.267261	-0.267261	-0.267261	-0.267261	-0.267261
OG0014716	N	N	Y		0	0		NA	NA	NA	NA		NA	NA		0	0	0	0	0	0	0	0	0	0	0	5	0	0	0	0	0	0			-0.267261	-0.267261	-0.267261	-0.267261	-0.267261	-0.267261	-0.267261	-0.267261	-0.267261	-0.267261	-0.267261	3.74166	-0.267261	-0.267261
OG0014761	N	N	Y		0	0		NA	NA	NA	NA		NA	NA		0	0	0	0	0	0	0	0	0	5	0	0	0	0	0	0	0	0			-0.267261	-0.267261	-0.267261	-0.267261	-0.267261	-0.267261	-0.267261	-0.267261	-0.267261	3.74166	-0.267261	-0.267261	-0.267261	-0.267261
OG0014762	N	N	Y		0	0		NA	NA	NA	NA		NA	NA		0	0	0	0	0	0	0	0	0	5	0	0	0	0	0	0	0	0			-0.267261	-0.267261	-0.267261	-0.267261	-0.267261	-0.267261	-0.267261	-0.267261	-0.267261	3.74166	-0.267261	-0.267261	-0.267261	-0.267261
OG0014763	N	N	Y		0	0		NA	NA	NA	NA		NA	NA		0	0	0	0	0	0	0	0	0	5	0	0	0	0	0	0	0	0			-0.267261	-0.267261	-0.267261	-0.267261	-0.267261	-0.267261	-0.267261	-0.267261	-0.267261	3.74166	-0.267261	-0.267261	-0.267261	-0.267261
OG0014767	N	N	Y		0	0		NA	NA	NA	NA		NA	NA		0	0	0	0	0	0	0	0	0	1	0	0	0	0	0	0	4	0			-0.267261	-0.267261	-0.267261	-0.267261	-0.267261	-0.267261	-0.267261	-0.267261	-0.267261	3.74166	-0.267261	-0.267261	-0.267261	-0.267261
OG0014768	N	N	Y		0	0		NA	NA	NA	NA		NA	NA		0	0	0	0	0	0	0	0	0	5	0	0	0	0	0	0	0	0			-0.267261	-0.267261	-0.267261	-0.267261	-0.267261	-0.267261	-0.267261	-0.267261	-0.267261	3.74166	-0.267261	-0.267261	-0.267261	-0.267261
OG0014773	N	N	Y		0	0		NA	NA	NA	NA		NA	NA		0	0	0	0	0	0	0	0	0	5	0	0	0	0	0	0	0	0			-0.267261	-0.267261	-0.267261	-0.267261	-0.267261	-0.267261	-0.267261	-0.267261	-0.267261	3.74166	-0.267261	-0.267261	-0.267261	-0.267261
OG0014774	N	N	Y		0	0		NA	NA	NA	NA		NA	NA		0	0	0	0	0	0	0	0	0	2	0	0	0	0	0	0	3	0			-0.267261	-0.267261	-0.267261	-0.267261	-0.267261	-0.267261	-0.267261	-0.267261	-0.267261	3.74166	-0.267261	-0.267261	-0.267261	-0.267261
OG0014777	N	N	Y		0	0		NA	NA	NA	NA		NA	NA		0	0	0	0	0	0	0	0	0	5	0	0	0	0	0	0	0	0			-0.267261	-0.267261	-0.267261	-0.267261	-0.267261	-0.267261	-0.267261	-0.267261	-0.267261	3.74166	-0.267261	-0.267261	-0.267261	-0.267261
OG0014781	N	N	Y		0	0		NA	NA	NA	NA		NA	NA		0	0	0	0	0	0	0	0	0	2	0	0	0	0	0	0	2	1			-0.267261	-0.267261	-0.267261	-0.267261	-0.267261	-0.267261	-0.267261	-0.267261	-0.267261	3.74166	-0.267261	-0.267261	-0.267261	-0.267261
OG0014801	N	N	Y		0	0		NA	NA	NA	NA		NA	NA		0	0	0	0	0	0	0	0	0	2	0	0	0	0	0	0	3	0			-0.267261	-0.267261	-0.267261	-0.267261	-0.267261	-0.267261	-0.267261	-0.267261	-0.267261	3.74166	-0.267261	-0.267261	-0.267261	-0.267261
OG0014825	N	N	Y		0	0		NA	NA	NA	NA		NA	NA		0	0	0	0	0	0	0	0	5	0	0	0	0	0	0	0	0	0			-0.267261	-0.267261	-0.267261	-0.267261	-0.267261	-0.267261	-0.267261	-0.267261	3.74166	-0.267261	-0.267261	-0.267261	-0.267261	-0.267261
OG0014838	N	N	Y		0	0		NA	NA	NA	NA		NA	NA		0	0	0	0	0	0	0	0	5	0	0	0	0	0	0	0	0	0			-0.267261	-0.267261	-0.267261	-0.267261	-0.267261	-0.267261	-0.267261	-0.267261	3.74166	-0.267261	-0.267261	-0.267261	-0.267261	-0.267261
OG0014848	N	N	Y		0	0		NA	NA	NA	NA		NA	NA		0	0	0	0	0	0	0	0	3	0	0	0	0	0	0	0	2	0			-0.267261	-0.267261	-0.267261	-0.267261	-0.267261	-0.267261	-0.267261	-0.267261	3.74166	-0.267261	-0.267261	-0.267261	-0.267261	-0.267261
OG0014875	N	N	Y		0	0		NA	NA	NA	NA		NA	NA		0	0	0	0	0	0	0	0	3	0	0	0	0	0	0	0	2	0			-0.267261	-0.267261	-0.267261	-0.267261	-0.267261	-0.267261	-0.267261	-0.267261	3.74166	-0.267261	-0.267261	-0.267261	-0.267261	-0.267261
OG0014904	N	N	Y		0	0		NA	NA	NA	NA		NA	NA		0	0	0	0	0	0	0	0	5	0	0	0	0	0	0	0	0	0			-0.267261	-0.267261	-0.267261	-0.267261	-0.267261	-0.267261	-0.267261	-0.267261	3.74166	-0.267261	-0.267261	-0.267261	-0.267261	-0.267261
OG0014912	N	N	Y		0	0		NA	NA	NA	NA		NA	NA		0	0	0	0	0	0	0	0	5	0	0	0	0	0	0	0	0	0			-0.267261	-0.267261	-0.267261	-0.267261	-0.267261	-0.267261	-0.267261	-0.267261	3.74166	-0.267261	-0.267261	-0.267261	-0.267261	-0.267261
OG0014940	N	N	Y		0	0		NA	NA	NA	NA		NA	NA		0	0	0	0	0	0	0	0	0	0	5	0	0	0	0	0	0	0			-0.267261	-0.267261	-0.267261	-0.267261	-0.267261	-0.267261	-0.267261	-0.267261	-0.267261	-0.267261	3.74166	-0.267261	-0.267261	-0.267261
OG0014941	N	N	Y		0	0		NA	NA	NA	NA		NA	NA		0	0	0	0	0	0	0	0	0	0	5	0	0	0	0	0	0	0			-0.267261	-0.267261	-0.267261	-0.267261	-0.267261	-0.267261	-0.267261	-0.267261	-0.267261	-0.267261	3.74166	-0.267261	-0.267261	-0.267261
OG0014942	N	N	Y		0	0		NA	NA	NA	NA		NA	NA		0	0	0	0	0	0	0	0	0	0	5	0	0	0	0	0	0	0			-0.267261	-0.267261	-0.267261	-0.267261	-0.267261	-0.267261	-0.267261	-0.267261	-0.267261	-0.267261	3.74166	-0.267261	-0.267261	-0.267261
OG0014943	N	N	Y		0	0		NA	NA	NA	NA		NA	NA		0	0	0	0	0	0	0	0	0	0	5	0	0	0	0	0	0	0			-0.267261	-0.267261	-0.267261	-0.267261	-0.267261	-0.267261	-0.267261	-0.267261	-0.267261	-0.267261	3.74166	-0.267261	-0.267261	-0.267261
OG0014944	N	N	Y		0	0		NA	NA	NA	NA		NA	NA		0	0	0	0	0	0	0	0	0	0	5	0	0	0	0	0	0	0			-0.267261	-0.267261	-0.267261	-0.267261	-0.267261	-0.267261	-0.267261	-0.267261	-0.267261	-0.267261	3.74166	-0.267261	-0.267261	-0.267261
OG0014945	N	N	Y		0	0		NA	NA	NA	NA		NA	NA		0	0	0	0	0	0	0	0	0	0	5	0	0	0	0	0	0	0			-0.267261	-0.267261	-0.267261	-0.267261	-0.267261	-0.267261	-0.267261	-0.267261	-0.267261	-0.267261	3.74166	-0.267261	-0.267261	-0.267261
OG0014946	N	N	Y		0	0		NA	NA	NA	NA		NA	NA		0	0	0	0	0	0	0	0	0	0	5	0	0	0	0	0	0	0			-0.267261	-0.267261	-0.267261	-0.267261	-0.267261	-0.267261	-0.267261	-0.267261	-0.267261	-0.267261	3.74166	-0.267261	-0.267261	-0.267261
OG0014947	N	N	Y		0	0		NA	NA	NA	NA		NA	NA		0	0	0	0	0	0	0	0	0	0	5	0	0	0	0	0	0	0			-0.267261	-0.267261	-0.267261	-0.267261	-0.267261	-0.267261	-0.267261	-0.267261	-0.267261	-0.267261	3.74166	-0.267261	-0.267261	-0.267261
OG0014948	N	N	Y		0	0		NA	NA	NA	NA		NA	NA		0	0	0	0	0	0	0	0	0	0	5	0	0	0	0	0	0	0			-0.267261	-0.267261	-0.267261	-0.267261	-0.267261	-0.267261	-0.267261	-0.267261	-0.267261	-0.267261	3.74166	-0.267261	-0.267261	-0.267261
OG0014951	N	N	Y		0	0		NA	NA	NA	NA		NA	NA		0	0	0	0	0	0	0	0	0	0	5	0	0	0	0	0	0	0			-0.267261	-0.267261	-0.267261	-0.267261	-0.267261	-0.267261	-0.267261	-0.267261	-0.267261	-0.267261	3.74166	-0.267261	-0.267261	-0.267261
OG0014952	N	N	Y		0	0		NA	NA	NA	NA		NA	NA		0	0	0	0	0	0	0	0	0	0	5	0	0	0	0	0	0	0			-0.267261	-0.267261	-0.267261	-0.267261	-0.267261	-0.267261	-0.267261	-0.267261	-0.267261	-0.267261	3.74166	-0.267261	-0.267261	-0.267261
OG0014953	N	N	Y		0	0		NA	NA	NA	NA		NA	NA		0	0	0	0	0	0	0	0	0	0	5	0	0	0	0	0	0	0			-0.267261	-0.267261	-0.267261	-0.267261	-0.267261	-0.267261	-0.267261	-0.267261	-0.267261	-0.267261	3.74166	-0.267261	-0.267261	-0.267261
OG0014954	N	N	Y		0	0		NA	NA	NA	NA		NA	NA		0	0	0	0	0	0	0	0	0	0	5	0	0	0	0	0	0	0			-0.267261	-0.267261	-0.267261	-0.267261	-0.267261	-0.267261	-0.267261	-0.267261	-0.267261	-0.267261	3.74166	-0.267261	-0.267261	-0.267261
OG0014955	N	N	Y		0	0		NA	NA	NA	NA		NA	NA		0	0	0	0	0	0	0	0	0	0	5	0	0	0	0	0	0	0			-0.267261	-0.267261	-0.267261	-0.267261	-0.267261	-0.267261	-0.267261	-0.267261	-0.267261	-0.267261	3.74166	-0.267261	-0.267261	-0.267261
OG0014956	N	N	Y		0	0		NA	NA	NA	NA		NA	NA		0	0	0	0	0	0	0	0	0	0	3	0	0	0	0	0	0	2			-0.267261	-0.267261	-0.267261	-0.267261	-0.267261	-0.267261	-0.267261	-0.267261	-0.267261	-0.267261	3.74166	-0.267261	-0.267261	-0.267261
OG0014957	N	N	Y		0	0		NA	NA	NA	NA		NA	NA		0	0	0	0	0	0	0	0	0	0	5	0	0	0	0	0	0	0			-0.267261	-0.267261	-0.267261	-0.267261	-0.267261	-0.267261	-0.267261	-0.267261	-0.267261	-0.267261	3.74166	-0.267261	-0.267261	-0.267261
OG0014958	N	N	Y		0	0		NA	NA	NA	NA		NA	NA		0	0	0	0	0	0	0	0	0	0	5	0	0	0	0	0	0	0			-0.267261	-0.267261	-0.267261	-0.267261	-0.267261	-0.267261	-0.267261	-0.267261	-0.267261	-0.267261	3.74166	-0.267261	-0.267261	-0.267261
OG0014960	N	N	Y		0	0		NA	NA	NA	NA		NA	NA		0	0	0	0	0	0	0	0	0	0	5	0	0	0	0	0	0	0			-0.267261	-0.267261	-0.267261	-0.267261	-0.267261	-0.267261	-0.267261	-0.267261	-0.267261	-0.267261	3.74166	-0.267261	-0.267261	-0.267261
OG0014962	N	N	Y		0	0		NA	NA	NA	NA		NA	NA		0	0	0	0	0	0	0	0	0	0	5	0	0	0	0	0	0	0			-0.267261	-0.267261	-0.267261	-0.267261	-0.267261	-0.267261	-0.267261	-0.267261	-0.267261	-0.267261	3.74166	-0.267261	-0.267261	-0.267261
OG0014963	N	N	Y		0	0		NA	NA	NA	NA		NA	NA		0	0	0	0	0	0	0	0	0	0	5	0	0	0	0	0	0	0			-0.267261	-0.267261	-0.267261	-0.267261	-0.267261	-0.267261	-0.267261	-0.267261	-0.267261	-0.267261	3.74166	-0.267261	-0.267261	-0.267261
OG0014968	N	N	Y		0	0		NA	NA	NA	NA		NA	NA		0	5	0	0	0	0	0	0	0	0	0	0	0	0	0	0	0	0			-0.267261	3.74166	-0.267261	-0.267261	-0.267261	-0.267261	-0.267261	-0.267261	-0.267261	-0.267261	-0.267261	-0.267261	-0.267261	-0.267261
OG0014981	N	N	Y		0	0		NA	NA	NA	NA		NA	NA		0	5	0	0	0	0	0	0	0	0	0	0	0	0	0	0	0	0			-0.267261	3.74166	-0.267261	-0.267261	-0.267261	-0.267261	-0.267261	-0.267261	-0.267261	-0.267261	-0.267261	-0.267261	-0.267261	-0.267261
OG0015022	N	N	Y		0	0		NA	NA	NA	NA		NA	NA		0	0	0	0	0	4	0	0	0	0	0	0	0	0	0	0	1	0			-0.267261	-0.267261	-0.267261	-0.267261	-0.267261	3.74166	-0.267261	-0.267261	-0.267261	-0.267261	-0.267261	-0.267261	-0.267261	-0.267261
OG0015031	N	N	Y		0	0		NA	NA	NA	NA		NA	NA		0	0	0	0	0	5	0	0	0	0	0	0	0	0	0	0	0	0			-0.267261	-0.267261	-0.267261	-0.267261	-0.267261	3.74166	-0.267261	-0.267261	-0.267261	-0.267261	-0.267261	-0.267261	-0.267261	-0.267261
OG0015032	N	N	Y		0	0		NA	NA	NA	NA		NA	NA		0	0	0	0	0	5	0	0	0	0	0	0	0	0	0	0	0	0			-0.267261	-0.267261	-0.267261	-0.267261	-0.267261	3.74166	-0.267261	-0.267261	-0.267261	-0.267261	-0.267261	-0.267261	-0.267261	-0.267261
OG0015034	N	N	Y		0	0		NA	NA	NA	NA		NA	NA		0	0	0	0	0	2	0	0	0	0	0	0	0	0	0	0	3	0			-0.267261	-0.267261	-0.267261	-0.267261	-0.267261	3.74166	-0.267261	-0.267261	-0.267261	-0.267261	-0.267261	-0.267261	-0.267261	-0.267261
OG0015037	N	N	Y		0	0		NA	NA	NA	NA		NA	NA		0	0	0	0	0	5	0	0	0	0	0	0	0	0	0	0	0	0			-0.267261	-0.267261	-0.267261	-0.267261	-0.267261	3.74166	-0.267261	-0.267261	-0.267261	-0.267261	-0.267261	-0.267261	-0.267261	-0.267261
OG0015041	N	N	Y		0	0		NA	NA	NA	NA		NA	NA		0	0	0	0	0	2	0	0	0	0	0	0	0	0	0	0	3	0			-0.267261	-0.267261	-0.267261	-0.267261	-0.267261	3.74166	-0.267261	-0.267261	-0.267261	-0.267261	-0.267261	-0.267261	-0.267261	-0.267261
OG0015044	N	N	Y		0	0		NA	NA	NA	NA		NA	NA		0	0	0	0	0	5	0	0	0	0	0	0	0	0	0	0	0	0			-0.267261	-0.267261	-0.267261	-0.267261	-0.267261	3.74166	-0.267261	-0.267261	-0.267261	-0.267261	-0.267261	-0.267261	-0.267261	-0.267261
OG0015045	N	N	Y		0	0		NA	NA	NA	NA		NA	NA		0	0	0	0	0	5	0	0	0	0	0	0	0	0	0	0	0	0			-0.267261	-0.267261	-0.267261	-0.267261	-0.267261	3.74166	-0.267261	-0.267261	-0.267261	-0.267261	-0.267261	-0.267261	-0.267261	-0.267261
OG0015053	N	N	Y		0	0		NA	NA	NA	NA		NA	NA		0	0	0	0	0	5	0	0	0	0	0	0	0	0	0	0	0	0			-0.267261	-0.267261	-0.267261	-0.267261	-0.267261	3.74166	-0.267261	-0.267261	-0.267261	-0.267261	-0.267261	-0.267261	-0.267261	-0.267261
OG0015056	N	N	Y		0	0		NA	NA	NA	NA		NA	NA		0	0	0	0	0	5	0	0	0	0	0	0	0	0	0	0	0	0			-0.267261	-0.267261	-0.267261	-0.267261	-0.267261	3.74166	-0.267261	-0.267261	-0.267261	-0.267261	-0.267261	-0.267261	-0.267261	-0.267261
OG0015064	N	N	Y		0	0		NA	NA	NA	NA		NA	NA		0	0	0	0	0	1	0	0	0	0	0	0	0	0	0	0	4	0			-0.267261	-0.267261	-0.267261	-0.267261	-0.267261	3.74166	-0.267261	-0.267261	-0.267261	-0.267261	-0.267261	-0.267261	-0.267261	-0.267261
OG0015065	N	N	Y		0	0		NA	NA	NA	NA		NA	NA		0	0	0	0	0	0	0	0	0	0	0	0	0	0	0	0	5	0			#NUM!	#NUM!	#NUM!	#NUM!	#NUM!	#NUM!	#NUM!	#NUM!	#NUM!	#NUM!	#NUM!	#NUM!	#NUM!	#NUM!
OG0015066	N	N	Y		0	0		NA	NA	NA	NA		NA	NA		1	0	0	0	0	0	0	0	0	0	0	0	0	0	0	0	4	0			3.74166	-0.267261	-0.267261	-0.267261	-0.267261	-0.267261	-0.267261	-0.267261	-0.267261	-0.267261	-0.267261	-0.267261	-0.267261	-0.267261
OG0015068	N	N	Y		0	0		NA	NA	NA	NA		NA	NA		0	0	0	0	0	0	0	0	0	0	0	0	0	0	0	0	5	0			#NUM!	#NUM!	#NUM!	#NUM!	#NUM!	#NUM!	#NUM!	#NUM!	#NUM!	#NUM!	#NUM!	#NUM!	#NUM!	#NUM!
OG0015069	N	N	Y		0	0		NA	NA	NA	NA		NA	NA		0	0	0	0	0	0	0	0	0	0	0	0	0	0	0	0	5	0			#NUM!	#NUM!	#NUM!	#NUM!	#NUM!	#NUM!	#NUM!	#NUM!	#NUM!	#NUM!	#NUM!	#NUM!	#NUM!	#NUM!
OG0015071	N	N	Y		0	0		NA	NA	NA	NA		NA	NA		0	0	0	0	1	0	0	0	0	0	0	0	0	0	0	0	4	0			-0.267261	-0.267261	-0.267261	-0.267261	3.74166	-0.267261	-0.267261	-0.267261	-0.267261	-0.267261	-0.267261	-0.267261	-0.267261	-0.267261
OG0015072	N	N	Y		0	0		NA	NA	NA	NA		NA	NA		0	0	0	0	0	0	0	0	0	0	0	0	0	0	0	0	5	0			#NUM!	#NUM!	#NUM!	#NUM!	#NUM!	#NUM!	#NUM!	#NUM!	#NUM!	#NUM!	#NUM!	#NUM!	#NUM!	#NUM!
OG0015074	N	N	Y		0	0		NA	NA	NA	NA		NA	NA		0	0	0	0	0	0	0	0	0	0	0	0	0	0	0	0	5	0			#NUM!	#NUM!	#NUM!	#NUM!	#NUM!	#NUM!	#NUM!	#NUM!	#NUM!	#NUM!	#NUM!	#NUM!	#NUM!	#NUM!
OG0015076	N	N	Y		0	0		NA	NA	NA	NA		NA	NA		0	0	0	0	0	0	0	0	0	0	0	0	0	0	0	0	5	0			#NUM!	#NUM!	#NUM!	#NUM!	#NUM!	#NUM!	#NUM!	#NUM!	#NUM!	#NUM!	#NUM!	#NUM!	#NUM!	#NUM!
OG0015077	N	N	Y		0	0		NA	NA	NA	NA		NA	NA		0	0	0	0	0	0	0	0	0	0	0	0	0	0	0	0	5	0			#NUM!	#NUM!	#NUM!	#NUM!	#NUM!	#NUM!	#NUM!	#NUM!	#NUM!	#NUM!	#NUM!	#NUM!	#NUM!	#NUM!
OG0015079	N	N	Y		0	0		NA	NA	NA	NA		NA	NA		0	0	0	0	0	0	0	0	0	0	0	0	0	0	0	0	5	0			#NUM!	#NUM!	#NUM!	#NUM!	#NUM!	#NUM!	#NUM!	#NUM!	#NUM!	#NUM!	#NUM!	#NUM!	#NUM!	#NUM!
OG0015080	N	N	Y		0	0		NA	NA	NA	NA		NA	NA		0	0	0	0	0	0	0	0	0	0	0	0	0	0	0	0	5	0			#NUM!	#NUM!	#NUM!	#NUM!	#NUM!	#NUM!	#NUM!	#NUM!	#NUM!	#NUM!	#NUM!	#NUM!	#NUM!	#NUM!
OG0015083	N	N	Y		0	0		NA	NA	NA	NA		NA	NA		0	0	0	0	5	0	0	0	0	0	0	0	0	0	0	0	0	0			-0.267261	-0.267261	-0.267261	-0.267261	3.74166	-0.267261	-0.267261	-0.267261	-0.267261	-0.267261	-0.267261	-0.267261	-0.267261	-0.267261
OG0015086	N	N	Y		0	0		NA	NA	NA	NA		NA	NA		0	0	0	0	5	0	0	0	0	0	0	0	0	0	0	0	0	0			-0.267261	-0.267261	-0.267261	-0.267261	3.74166	-0.267261	-0.267261	-0.267261	-0.267261	-0.267261	-0.267261	-0.267261	-0.267261	-0.267261
OG0015087	N	N	Y		0	0		NA	NA	NA	NA		NA	NA		0	0	0	0	5	0	0	0	0	0	0	0	0	0	0	0	0	0			-0.267261	-0.267261	-0.267261	-0.267261	3.74166	-0.267261	-0.267261	-0.267261	-0.267261	-0.267261	-0.267261	-0.267261	-0.267261	-0.267261
OG0015088	N	N	Y		0	0		NA	NA	NA	NA		NA	NA		0	0	0	0	5	0	0	0	0	0	0	0	0	0	0	0	0	0			-0.267261	-0.267261	-0.267261	-0.267261	3.74166	-0.267261	-0.267261	-0.267261	-0.267261	-0.267261	-0.267261	-0.267261	-0.267261	-0.267261
OG0015090	N	N	Y		0	0		NA	NA	NA	NA		NA	NA		0	0	0	0	5	0	0	0	0	0	0	0	0	0	0	0	0	0			-0.267261	-0.267261	-0.267261	-0.267261	3.74166	-0.267261	-0.267261	-0.267261	-0.267261	-0.267261	-0.267261	-0.267261	-0.267261	-0.267261
OG0015275	N	N	Y		0	0		NA	NA	NA	NA		NA	NA		0	0	0	0	0	0	5	0	0	0	0	0	0	0	0	0	0	0			-0.267261	-0.267261	-0.267261	-0.267261	-0.267261	-0.267261	3.74166	-0.267261	-0.267261	-0.267261	-0.267261	-0.267261	-0.267261	-0.267261
OG0015277	N	N	Y		0	0		NA	NA	NA	NA		NA	NA		0	0	0	0	0	0	5	0	0	0	0	0	0	0	0	0	0	0			-0.267261	-0.267261	-0.267261	-0.267261	-0.267261	-0.267261	3.74166	-0.267261	-0.267261	-0.267261	-0.267261	-0.267261	-0.267261	-0.267261
OG0015278	N	N	Y		0	0		NA	NA	NA	NA		NA	NA		0	0	0	0	0	0	5	0	0	0	0	0	0	0	0	0	0	0			-0.267261	-0.267261	-0.267261	-0.267261	-0.267261	-0.267261	3.74166	-0.267261	-0.267261	-0.267261	-0.267261	-0.267261	-0.267261	-0.267261
OG0015280	N	N	Y		0	0		NA	NA	NA	NA		NA	NA		0	0	0	0	0	0	5	0	0	0	0	0	0	0	0	0	0	0			-0.267261	-0.267261	-0.267261	-0.267261	-0.267261	-0.267261	3.74166	-0.267261	-0.267261	-0.267261	-0.267261	-0.267261	-0.267261	-0.267261
OG0015282	N	N	Y		0	0		NA	NA	NA	NA		NA	NA		0	0	0	0	0	0	5	0	0	0	0	0	0	0	0	0	0	0			-0.267261	-0.267261	-0.267261	-0.267261	-0.267261	-0.267261	3.74166	-0.267261	-0.267261	-0.267261	-0.267261	-0.267261	-0.267261	-0.267261
OG0015283	N	N	Y		0	0		NA	NA	NA	NA		NA	NA		0	0	0	0	0	0	5	0	0	0	0	0	0	0	0	0	0	0			-0.267261	-0.267261	-0.267261	-0.267261	-0.267261	-0.267261	3.74166	-0.267261	-0.267261	-0.267261	-0.267261	-0.267261	-0.267261	-0.267261
OG0015284	N	N	Y		0	0		NA	NA	NA	NA		NA	NA		0	0	0	0	0	0	5	0	0	0	0	0	0	0	0	0	0	0			-0.267261	-0.267261	-0.267261	-0.267261	-0.267261	-0.267261	3.74166	-0.267261	-0.267261	-0.267261	-0.267261	-0.267261	-0.267261	-0.267261
OG0015285	N	N	Y		0	0		NA	NA	NA	NA		NA	NA		5	0	0	0	0	0	0	0	0	0	0	0	0	0	0	0	0	0			3.74166	-0.267261	-0.267261	-0.267261	-0.267261	-0.267261	-0.267261	-0.267261	-0.267261	-0.267261	-0.267261	-0.267261	-0.267261	-0.267261
OG0015287	N	N	Y		0	0		NA	NA	NA	NA		NA	NA		0	0	0	0	0	0	0	0	0	0	0	0	0	0	0	0	0	5			#NUM!	#NUM!	#NUM!	#NUM!	#NUM!	#NUM!	#NUM!	#NUM!	#NUM!	#NUM!	#NUM!	#NUM!	#NUM!	#NUM!
OG0015288	N	N	Y		0	0		NA	NA	NA	NA		NA	NA		0	0	0	0	0	0	0	0	0	0	0	0	0	0	0	0	0	5			#NUM!	#NUM!	#NUM!	#NUM!	#NUM!	#NUM!	#NUM!	#NUM!	#NUM!	#NUM!	#NUM!	#NUM!	#NUM!	#NUM!
OG0015289	N	N	Y		0	0		NA	NA	NA	NA		NA	NA		0	0	0	0	0	0	0	0	0	0	0	0	0	0	1	0	0	4			-0.267261	-0.267261	-0.267261	-0.267261	-0.267261	-0.267261	-0.267261	-0.267261	-0.267261	-0.267261	-0.267261	-0.267261	-0.267261	-0.267261
OG0015290	N	N	Y		0	0		NA	NA	NA	NA		NA	NA		0	0	0	0	0	0	0	0	0	0	0	0	0	0	0	0	0	5			#NUM!	#NUM!	#NUM!	#NUM!	#NUM!	#NUM!	#NUM!	#NUM!	#NUM!	#NUM!	#NUM!	#NUM!	#NUM!	#NUM!
OG0015291	N	N	Y		0	0		NA	NA	NA	NA		NA	NA		0	0	0	0	0	0	0	0	0	0	0	0	0	0	0	0	0	5			#NUM!	#NUM!	#NUM!	#NUM!	#NUM!	#NUM!	#NUM!	#NUM!	#NUM!	#NUM!	#NUM!	#NUM!	#NUM!	#NUM!
OG0015292	N	N	Y		0	0		NA	NA	NA	NA		NA	NA		0	0	0	0	0	0	0	0	0	0	0	0	0	0	0	0	0	5			#NUM!	#NUM!	#NUM!	#NUM!	#NUM!	#NUM!	#NUM!	#NUM!	#NUM!	#NUM!	#NUM!	#NUM!	#NUM!	#NUM!
OG0015293	N	N	Y		0	0		NA	NA	NA	NA		NA	NA		0	0	0	0	0	0	0	0	0	0	0	0	0	0	1	0	0	4			-0.267261	-0.267261	-0.267261	-0.267261	-0.267261	-0.267261	-0.267261	-0.267261	-0.267261	-0.267261	-0.267261	-0.267261	-0.267261	-0.267261
OG0015294	N	N	Y		0	0		NA	NA	NA	NA		NA	NA		0	0	0	0	0	0	0	0	0	0	0	0	0	0	0	0	0	5			#NUM!	#NUM!	#NUM!	#NUM!	#NUM!	#NUM!	#NUM!	#NUM!	#NUM!	#NUM!	#NUM!	#NUM!	#NUM!	#NUM!
OG0015295	N	N	Y		0	0		NA	NA	NA	NA		NA	NA		0	0	0	0	0	0	0	0	0	0	0	0	0	0	0	0	0	5			#NUM!	#NUM!	#NUM!	#NUM!	#NUM!	#NUM!	#NUM!	#NUM!	#NUM!	#NUM!	#NUM!	#NUM!	#NUM!	#NUM!
OG0015296	N	N	Y		0	0		NA	NA	NA	NA		NA	NA		0	0	0	0	0	0	0	0	0	0	0	0	0	0	0	0	0	5			#NUM!	#NUM!	#NUM!	#NUM!	#NUM!	#NUM!	#NUM!	#NUM!	#NUM!	#NUM!	#NUM!	#NUM!	#NUM!	#NUM!
OG0015297	N	N	Y		0	0		NA	NA	NA	NA		NA	NA		0	0	0	0	0	0	0	1	0	0	0	0	0	0	0	0	0	4			-0.267261	-0.267261	-0.267261	-0.267261	-0.267261	-0.267261	-0.267261	3.74166	-0.267261	-0.267261	-0.267261	-0.267261	-0.267261	-0.267261
OG0015298	N	N	Y		0	0		NA	NA	NA	NA		NA	NA		0	0	0	0	0	0	0	0	0	0	0	0	0	0	0	0	0	5			#NUM!	#NUM!	#NUM!	#NUM!	#NUM!	#NUM!	#NUM!	#NUM!	#NUM!	#NUM!	#NUM!	#NUM!	#NUM!	#NUM!
OG0015299	N	N	Y		0	0		NA	NA	NA	NA		NA	NA		0	0	0	0	0	0	0	0	0	0	0	0	0	0	0	0	0	5			#NUM!	#NUM!	#NUM!	#NUM!	#NUM!	#NUM!	#NUM!	#NUM!	#NUM!	#NUM!	#NUM!	#NUM!	#NUM!	#NUM!
OG0015300	N	N	Y		0	0		NA	NA	NA	NA		NA	NA		0	0	0	0	0	0	0	0	0	0	0	0	0	0	0	0	0	5			#NUM!	#NUM!	#NUM!	#NUM!	#NUM!	#NUM!	#NUM!	#NUM!	#NUM!	#NUM!	#NUM!	#NUM!	#NUM!	#NUM!
OG0015301	N	N	Y		0	0		NA	NA	NA	NA		NA	NA		0	0	0	0	0	0	0	0	0	0	0	0	0	0	0	0	0	5			#NUM!	#NUM!	#NUM!	#NUM!	#NUM!	#NUM!	#NUM!	#NUM!	#NUM!	#NUM!	#NUM!	#NUM!	#NUM!	#NUM!
OG0015302	N	N	Y		0	0		NA	NA	NA	NA		NA	NA		0	0	0	0	0	0	0	0	0	0	0	0	0	0	0	0	0	5			#NUM!	#NUM!	#NUM!	#NUM!	#NUM!	#NUM!	#NUM!	#NUM!	#NUM!	#NUM!	#NUM!	#NUM!	#NUM!	#NUM!
OG0015303	N	N	Y		0	0		NA	NA	NA	NA		NA	NA		0	0	0	0	0	0	0	5	0	0	0	0	0	0	0	0	0	0			-0.267261	-0.267261	-0.267261	-0.267261	-0.267261	-0.267261	-0.267261	3.74166	-0.267261	-0.267261	-0.267261	-0.267261	-0.267261	-0.267261
OG0015304	N	N	Y		0	0		NA	NA	NA	NA		NA	NA		0	0	0	0	0	0	0	5	0	0	0	0	0	0	0	0	0	0			-0.267261	-0.267261	-0.267261	-0.267261	-0.267261	-0.267261	-0.267261	3.74166	-0.267261	-0.267261	-0.267261	-0.267261	-0.267261	-0.267261
OG0015305	N	N	Y		0	0		NA	NA	NA	NA		NA	NA		0	0	0	0	0	0	0	5	0	0	0	0	0	0	0	0	0	0			-0.267261	-0.267261	-0.267261	-0.267261	-0.267261	-0.267261	-0.267261	3.74166	-0.267261	-0.267261	-0.267261	-0.267261	-0.267261	-0.267261
OG0015306	N	N	Y		0	0		NA	NA	NA	NA		NA	NA		0	0	0	0	0	0	0	5	0	0	0	0	0	0	0	0	0	0			-0.267261	-0.267261	-0.267261	-0.267261	-0.267261	-0.267261	-0.267261	3.74166	-0.267261	-0.267261	-0.267261	-0.267261	-0.267261	-0.267261
OG0015307	N	N	Y		0	0		NA	NA	NA	NA		NA	NA		0	0	0	0	0	0	0	5	0	0	0	0	0	0	0	0	0	0			-0.267261	-0.267261	-0.267261	-0.267261	-0.267261	-0.267261	-0.267261	3.74166	-0.267261	-0.267261	-0.267261	-0.267261	-0.267261	-0.267261
OG0015308	N	N	Y		0	0		NA	NA	NA	NA		NA	NA		0	0	0	0	0	0	0	5	0	0	0	0	0	0	0	0	0	0			-0.267261	-0.267261	-0.267261	-0.267261	-0.267261	-0.267261	-0.267261	3.74166	-0.267261	-0.267261	-0.267261	-0.267261	-0.267261	-0.267261
OG0015309	N	N	Y		0	0		NA	NA	NA	NA		NA	NA		0	0	0	0	0	0	0	5	0	0	0	0	0	0	0	0	0	0			-0.267261	-0.267261	-0.267261	-0.267261	-0.267261	-0.267261	-0.267261	3.74166	-0.267261	-0.267261	-0.267261	-0.267261	-0.267261	-0.267261
OG0015310	N	N	Y		0	0		NA	NA	NA	NA		NA	NA		0	0	0	0	0	0	0	5	0	0	0	0	0	0	0	0	0	0			-0.267261	-0.267261	-0.267261	-0.267261	-0.267261	-0.267261	-0.267261	3.74166	-0.267261	-0.267261	-0.267261	-0.267261	-0.267261	-0.267261
OG0015311	N	N	Y		0	0		NA	NA	NA	NA		NA	NA		0	0	0	0	0	0	0	0	0	0	0	0	4	0	0	0	0	0			-0.267261	-0.267261	-0.267261	-0.267261	-0.267261	-0.267261	-0.267261	-0.267261	-0.267261	-0.267261	-0.267261	-0.267261	3.74166	-0.267261
OG0015316	N	N	Y		0	0		NA	NA	NA	NA		NA	NA		0	0	0	0	0	0	0	0	0	0	0	0	4	0	0	0	0	0			-0.267261	-0.267261	-0.267261	-0.267261	-0.267261	-0.267261	-0.267261	-0.267261	-0.267261	-0.267261	-0.267261	-0.267261	3.74166	-0.267261
OG0015324	N	N	Y		0	0		NA	NA	NA	NA		NA	NA		0	0	0	0	0	0	0	0	0	0	0	0	4	0	0	0	0	0			-0.267261	-0.267261	-0.267261	-0.267261	-0.267261	-0.267261	-0.267261	-0.267261	-0.267261	-0.267261	-0.267261	-0.267261	3.74166	-0.267261
OG0015330	N	N	Y		0	0		NA	NA	NA	NA		NA	NA		0	0	0	0	0	0	0	0	0	0	0	0	4	0	0	0	0	0			-0.267261	-0.267261	-0.267261	-0.267261	-0.267261	-0.267261	-0.267261	-0.267261	-0.267261	-0.267261	-0.267261	-0.267261	3.74166	-0.267261
OG0015334	N	N	Y		0	0		NA	NA	NA	NA		NA	NA		0	0	0	0	0	0	0	0	0	0	0	0	4	0	0	0	0	0			-0.267261	-0.267261	-0.267261	-0.267261	-0.267261	-0.267261	-0.267261	-0.267261	-0.267261	-0.267261	-0.267261	-0.267261	3.74166	-0.267261
OG0015336	N	N	Y		0	0		NA	NA	NA	NA		NA	NA		0	0	0	0	0	0	0	0	0	0	0	0	4	0	0	0	0	0			-0.267261	-0.267261	-0.267261	-0.267261	-0.267261	-0.267261	-0.267261	-0.267261	-0.267261	-0.267261	-0.267261	-0.267261	3.74166	-0.267261
OG0015337	N	N	Y		0	0		NA	NA	NA	NA		NA	NA		0	0	0	0	0	0	0	0	0	0	0	0	4	0	0	0	0	0			-0.267261	-0.267261	-0.267261	-0.267261	-0.267261	-0.267261	-0.267261	-0.267261	-0.267261	-0.267261	-0.267261	-0.267261	3.74166	-0.267261
OG0015339	N	N	Y		0	0		NA	NA	NA	NA		NA	NA		0	0	0	0	0	0	0	0	0	0	0	0	4	0	0	0	0	0			-0.267261	-0.267261	-0.267261	-0.267261	-0.267261	-0.267261	-0.267261	-0.267261	-0.267261	-0.267261	-0.267261	-0.267261	3.74166	-0.267261
OG0015356	N	N	Y		0	0		NA	NA	NA	NA		NA	NA		0	0	0	0	0	0	0	0	0	0	0	0	4	0	0	0	0	0			-0.267261	-0.267261	-0.267261	-0.267261	-0.267261	-0.267261	-0.267261	-0.267261	-0.267261	-0.267261	-0.267261	-0.267261	3.74166	-0.267261
OG0015376	N	N	Y		0	0		NA	NA	NA	NA		NA	NA		0	0	0	0	0	0	0	0	0	0	0	0	4	0	0	0	0	0			-0.267261	-0.267261	-0.267261	-0.267261	-0.267261	-0.267261	-0.267261	-0.267261	-0.267261	-0.267261	-0.267261	-0.267261	3.74166	-0.267261
OG0015379	N	N	Y		0	0		NA	NA	NA	NA		NA	NA		0	0	0	0	0	0	0	0	0	0	0	0	4	0	0	0	0	0			-0.267261	-0.267261	-0.267261	-0.267261	-0.267261	-0.267261	-0.267261	-0.267261	-0.267261	-0.267261	-0.267261	-0.267261	3.74166	-0.267261
OG0015388	N	N	Y		0	0		NA	NA	NA	NA		NA	NA		0	0	0	0	0	0	0	0	0	0	0	0	4	0	0	0	0	0			-0.267261	-0.267261	-0.267261	-0.267261	-0.267261	-0.267261	-0.267261	-0.267261	-0.267261	-0.267261	-0.267261	-0.267261	3.74166	-0.267261
OG0015389	N	N	Y		0	0		NA	NA	NA	NA		NA	NA		0	0	0	0	0	0	0	0	0	0	0	0	4	0	0	0	0	0			-0.267261	-0.267261	-0.267261	-0.267261	-0.267261	-0.267261	-0.267261	-0.267261	-0.267261	-0.267261	-0.267261	-0.267261	3.74166	-0.267261
OG0015392	N	N	Y		0	0		NA	NA	NA	NA		NA	NA		0	0	0	0	0	0	0	0	0	0	0	0	4	0	0	0	0	0			-0.267261	-0.267261	-0.267261	-0.267261	-0.267261	-0.267261	-0.267261	-0.267261	-0.267261	-0.267261	-0.267261	-0.267261	3.74166	-0.267261
OG0015519	N	N	Y		0	0		NA	NA	NA	NA		NA	NA		0	0	0	4	0	0	0	0	0	0	0	0	0	0	0	0	0	0			-0.267261	-0.267261	-0.267261	3.74166	-0.267261	-0.267261	-0.267261	-0.267261	-0.267261	-0.267261	-0.267261	-0.267261	-0.267261	-0.267261
OG0015579	N	N	Y		0	0		NA	NA	NA	NA		NA	NA		0	0	0	4	0	0	0	0	0	0	0	0	0	0	0	0	0	0			-0.267261	-0.267261	-0.267261	3.74166	-0.267261	-0.267261	-0.267261	-0.267261	-0.267261	-0.267261	-0.267261	-0.267261	-0.267261	-0.267261
OG0015609	N	N	Y		0	0		NA	NA	NA	NA		NA	NA		0	0	0	4	0	0	0	0	0	0	0	0	0	0	0	0	0	0			-0.267261	-0.267261	-0.267261	3.74166	-0.267261	-0.267261	-0.267261	-0.267261	-0.267261	-0.267261	-0.267261	-0.267261	-0.267261	-0.267261
OG0015625	N	N	Y		0	0		NA	NA	NA	NA		NA	NA		0	0	0	4	0	0	0	0	0	0	0	0	0	0	0	0	0	0			-0.267261	-0.267261	-0.267261	3.74166	-0.267261	-0.267261	-0.267261	-0.267261	-0.267261	-0.267261	-0.267261	-0.267261	-0.267261	-0.267261
OG0015745	N	N	Y		0	0		NA	NA	NA	NA		NA	NA		0	0	0	4	0	0	0	0	0	0	0	0	0	0	0	0	0	0			-0.267261	-0.267261	-0.267261	3.74166	-0.267261	-0.267261	-0.267261	-0.267261	-0.267261	-0.267261	-0.267261	-0.267261	-0.267261	-0.267261
OG0015786	N	N	Y		0	0		NA	NA	NA	NA		NA	NA		0	0	0	0	0	0	0	0	0	0	0	0	0	0	0	1	1	2			#NUM!	#NUM!	#NUM!	#NUM!	#NUM!	#NUM!	#NUM!	#NUM!	#NUM!	#NUM!	#NUM!	#NUM!	#NUM!	#NUM!
OG0015788	N	N	Y		0	0		NA	NA	NA	NA		NA	NA		0	0	0	0	0	0	0	0	0	0	0	0	0	0	0	4	0	0			#NUM!	#NUM!	#NUM!	#NUM!	#NUM!	#NUM!	#NUM!	#NUM!	#NUM!	#NUM!	#NUM!	#NUM!	#NUM!	#NUM!
OG0015791	N	N	Y		0	0		NA	NA	NA	NA		NA	NA		0	0	0	0	0	0	0	0	0	0	0	0	0	0	0	4	0	0			#NUM!	#NUM!	#NUM!	#NUM!	#NUM!	#NUM!	#NUM!	#NUM!	#NUM!	#NUM!	#NUM!	#NUM!	#NUM!	#NUM!
OG0015792	N	N	Y		0	0		NA	NA	NA	NA		NA	NA		1	0	0	0	0	0	0	0	0	0	0	0	0	0	0	3	0	0			3.74166	-0.267261	-0.267261	-0.267261	-0.267261	-0.267261	-0.267261	-0.267261	-0.267261	-0.267261	-0.267261	-0.267261	-0.267261	-0.267261
OG0015793	N	N	Y		0	0		NA	NA	NA	NA		NA	NA		0	0	0	0	0	0	0	0	0	0	0	0	0	0	0	4	0	0			#NUM!	#NUM!	#NUM!	#NUM!	#NUM!	#NUM!	#NUM!	#NUM!	#NUM!	#NUM!	#NUM!	#NUM!	#NUM!	#NUM!
OG0015794	N	N	Y		0	0		NA	NA	NA	NA		NA	NA		0	0	0	0	0	0	0	0	0	0	0	0	0	0	0	4	0	0			#NUM!	#NUM!	#NUM!	#NUM!	#NUM!	#NUM!	#NUM!	#NUM!	#NUM!	#NUM!	#NUM!	#NUM!	#NUM!	#NUM!
OG0015799	N	N	Y		0	0		NA	NA	NA	NA		NA	NA		0	0	0	0	0	0	0	0	0	0	0	0	0	0	0	4	0	0			#NUM!	#NUM!	#NUM!	#NUM!	#NUM!	#NUM!	#NUM!	#NUM!	#NUM!	#NUM!	#NUM!	#NUM!	#NUM!	#NUM!
OG0015801	N	N	Y		0	0		NA	NA	NA	NA		NA	NA		0	0	0	0	0	0	0	2	0	0	0	0	0	0	0	2	0	0			-0.267261	-0.267261	-0.267261	-0.267261	-0.267261	-0.267261	-0.267261	3.74166	-0.267261	-0.267261	-0.267261	-0.267261	-0.267261	-0.267261
OG0015809	N	N	Y		0	0		NA	NA	NA	NA		NA	NA		0	0	0	0	0	0	1	0	0	0	0	0	0	0	0	2	1	0			-0.267261	-0.267261	-0.267261	-0.267261	-0.267261	-0.267261	3.74166	-0.267261	-0.267261	-0.267261	-0.267261	-0.267261	-0.267261	-0.267261
OG0015810	N	N	Y		0	0		NA	NA	NA	NA		NA	NA		1	0	0	0	0	0	0	0	0	0	0	0	0	0	0	3	0	0			3.74166	-0.267261	-0.267261	-0.267261	-0.267261	-0.267261	-0.267261	-0.267261	-0.267261	-0.267261	-0.267261	-0.267261	-0.267261	-0.267261
OG0015811	N	N	Y		0	0		NA	NA	NA	NA		NA	NA		0	0	0	0	0	0	0	0	0	0	0	0	0	0	0	4	0	0			#NUM!	#NUM!	#NUM!	#NUM!	#NUM!	#NUM!	#NUM!	#NUM!	#NUM!	#NUM!	#NUM!	#NUM!	#NUM!	#NUM!
OG0015812	N	N	Y		0	0		NA	NA	NA	NA		NA	NA		0	0	0	0	0	0	0	0	2	0	0	0	0	0	0	2	0	0			-0.267261	-0.267261	-0.267261	-0.267261	-0.267261	-0.267261	-0.267261	-0.267261	3.74166	-0.267261	-0.267261	-0.267261	-0.267261	-0.267261
OG0015815	N	N	Y		0	0		NA	NA	NA	NA		NA	NA		0	0	0	0	0	0	0	0	0	0	0	0	0	0	0	2	2	0			#NUM!	#NUM!	#NUM!	#NUM!	#NUM!	#NUM!	#NUM!	#NUM!	#NUM!	#NUM!	#NUM!	#NUM!	#NUM!	#NUM!
OG0015816	N	N	Y		0	0		NA	NA	NA	NA		NA	NA		0	0	0	0	1	0	0	0	0	0	0	0	0	0	0	3	0	0			-0.267261	-0.267261	-0.267261	-0.267261	3.74166	-0.267261	-0.267261	-0.267261	-0.267261	-0.267261	-0.267261	-0.267261	-0.267261	-0.267261
OG0015817	N	N	Y		0	0		NA	NA	NA	NA		NA	NA		0	0	0	0	0	0	0	0	0	0	0	0	0	0	0	4	0	0			#NUM!	#NUM!	#NUM!	#NUM!	#NUM!	#NUM!	#NUM!	#NUM!	#NUM!	#NUM!	#NUM!	#NUM!	#NUM!	#NUM!
OG0015820	N	N	Y		0	0		NA	NA	NA	NA		NA	NA		0	0	0	0	0	2	0	0	0	0	0	0	0	0	0	2	0	0			-0.267261	-0.267261	-0.267261	-0.267261	-0.267261	3.74166	-0.267261	-0.267261	-0.267261	-0.267261	-0.267261	-0.267261	-0.267261	-0.267261
OG0015823	N	N	Y		0	0		NA	NA	NA	NA		NA	NA		0	0	0	0	0	0	0	0	0	0	0	0	0	0	0	3	1	0			#NUM!	#NUM!	#NUM!	#NUM!	#NUM!	#NUM!	#NUM!	#NUM!	#NUM!	#NUM!	#NUM!	#NUM!	#NUM!	#NUM!
OG0015824	N	N	Y		0	0		NA	NA	NA	NA		NA	NA		0	0	0	0	0	0	0	0	0	1	0	0	0	0	0	3	0	0			-0.267261	-0.267261	-0.267261	-0.267261	-0.267261	-0.267261	-0.267261	-0.267261	-0.267261	3.74166	-0.267261	-0.267261	-0.267261	-0.267261
OG0015825	N	N	Y		0	0		NA	NA	NA	NA		NA	NA		0	0	0	0	0	0	0	0	0	2	0	0	0	0	0	1	1	0			-0.267261	-0.267261	-0.267261	-0.267261	-0.267261	-0.267261	-0.267261	-0.267261	-0.267261	3.74166	-0.267261	-0.267261	-0.267261	-0.267261
OG0015826	N	N	Y		0	0		NA	NA	NA	NA		NA	NA		0	0	0	0	0	0	0	3	0	0	0	0	0	0	0	1	0	0			-0.267261	-0.267261	-0.267261	-0.267261	-0.267261	-0.267261	-0.267261	3.74166	-0.267261	-0.267261	-0.267261	-0.267261	-0.267261	-0.267261
OG0015828	N	N	Y		0	0		NA	NA	NA	NA		NA	NA		0	0	0	0	0	0	0	0	0	0	0	0	0	0	0	4	0	0			#NUM!	#NUM!	#NUM!	#NUM!	#NUM!	#NUM!	#NUM!	#NUM!	#NUM!	#NUM!	#NUM!	#NUM!	#NUM!	#NUM!
OG0015830	N	N	Y		0	0		NA	NA	NA	NA		NA	NA		0	0	0	0	0	3	0	0	0	0	0	0	0	0	0	1	0	0			-0.267261	-0.267261	-0.267261	-0.267261	-0.267261	3.74166	-0.267261	-0.267261	-0.267261	-0.267261	-0.267261	-0.267261	-0.267261	-0.267261
OG0015832	N	N	Y		0	0		NA	NA	NA	NA		NA	NA		0	0	0	0	0	0	0	0	0	0	0	0	0	0	0	1	3	0			#NUM!	#NUM!	#NUM!	#NUM!	#NUM!	#NUM!	#NUM!	#NUM!	#NUM!	#NUM!	#NUM!	#NUM!	#NUM!	#NUM!
OG0015840	N	N	Y		0	0		NA	NA	NA	NA		NA	NA		0	0	0	0	0	0	0	0	0	2	0	0	0	0	0	2	0	0			-0.267261	-0.267261	-0.267261	-0.267261	-0.267261	-0.267261	-0.267261	-0.267261	-0.267261	3.74166	-0.267261	-0.267261	-0.267261	-0.267261
OG0015841	N	N	Y		0	0		NA	NA	NA	NA		NA	NA		0	0	0	0	0	0	0	0	0	0	0	0	0	0	0	4	0	0			#NUM!	#NUM!	#NUM!	#NUM!	#NUM!	#NUM!	#NUM!	#NUM!	#NUM!	#NUM!	#NUM!	#NUM!	#NUM!	#NUM!
OG0015843	N	N	Y		0	0		NA	NA	NA	NA		NA	NA		0	0	0	0	0	3	0	0	0	0	0	0	0	0	0	1	0	0			-0.267261	-0.267261	-0.267261	-0.267261	-0.267261	3.74166	-0.267261	-0.267261	-0.267261	-0.267261	-0.267261	-0.267261	-0.267261	-0.267261
OG0015845	N	N	Y		0	0		NA	NA	NA	NA		NA	NA		0	0	0	0	0	0	0	0	0	0	0	0	0	0	0	1	3	0			#NUM!	#NUM!	#NUM!	#NUM!	#NUM!	#NUM!	#NUM!	#NUM!	#NUM!	#NUM!	#NUM!	#NUM!	#NUM!	#NUM!
OG0015846	N	N	Y		0	0		NA	NA	NA	NA		NA	NA		0	0	0	0	0	0	0	0	0	0	1	0	0	0	0	1	2	0			-0.267261	-0.267261	-0.267261	-0.267261	-0.267261	-0.267261	-0.267261	-0.267261	-0.267261	-0.267261	3.74166	-0.267261	-0.267261	-0.267261
OG0015848	N	N	Y		0	0		NA	NA	NA	NA		NA	NA		0	1	0	0	0	0	0	0	0	0	0	0	0	0	0	3	0	0			-0.267261	3.74166	-0.267261	-0.267261	-0.267261	-0.267261	-0.267261	-0.267261	-0.267261	-0.267261	-0.267261	-0.267261	-0.267261	-0.267261
OG0015849	N	N	Y		0	0		NA	NA	NA	NA		NA	NA		0	0	0	0	0	0	0	0	0	3	0	0	0	0	0	1	0	0			-0.267261	-0.267261	-0.267261	-0.267261	-0.267261	-0.267261	-0.267261	-0.267261	-0.267261	3.74166	-0.267261	-0.267261	-0.267261	-0.267261
OG0015850	N	N	Y		0	0		NA	NA	NA	NA		NA	NA		0	0	0	0	0	0	0	0	0	0	3	0	0	0	0	1	0	0			-0.267261	-0.267261	-0.267261	-0.267261	-0.267261	-0.267261	-0.267261	-0.267261	-0.267261	-0.267261	3.74166	-0.267261	-0.267261	-0.267261
OG0015855	N	N	Y		0	0		NA	NA	NA	NA		NA	NA		0	0	0	0	0	0	0	0	0	1	0	0	0	0	0	1	2	0			-0.267261	-0.267261	-0.267261	-0.267261	-0.267261	-0.267261	-0.267261	-0.267261	-0.267261	3.74166	-0.267261	-0.267261	-0.267261	-0.267261
OG0015858	N	N	Y		0	0		NA	NA	NA	NA		NA	NA		0	0	0	0	0	0	0	1	0	0	0	0	0	0	0	1	2	0			-0.267261	-0.267261	-0.267261	-0.267261	-0.267261	-0.267261	-0.267261	3.74166	-0.267261	-0.267261	-0.267261	-0.267261	-0.267261	-0.267261
OG0015859	N	N	Y		0	0		NA	NA	NA	NA		NA	NA		0	0	0	0	0	0	0	0	0	0	0	0	0	0	0	1	3	0			#NUM!	#NUM!	#NUM!	#NUM!	#NUM!	#NUM!	#NUM!	#NUM!	#NUM!	#NUM!	#NUM!	#NUM!	#NUM!	#NUM!
OG0015860	N	N	Y		0	0		NA	NA	NA	NA		NA	NA		0	0	0	0	0	0	0	0	0	0	0	0	0	0	0	1	3	0			#NUM!	#NUM!	#NUM!	#NUM!	#NUM!	#NUM!	#NUM!	#NUM!	#NUM!	#NUM!	#NUM!	#NUM!	#NUM!	#NUM!
OG0015861	N	N	Y		0	0		NA	NA	NA	NA		NA	NA		0	0	0	0	0	0	0	0	0	1	0	0	0	0	0	1	2	0			-0.267261	-0.267261	-0.267261	-0.267261	-0.267261	-0.267261	-0.267261	-0.267261	-0.267261	3.74166	-0.267261	-0.267261	-0.267261	-0.267261
OG0015862	N	N	Y		0	0		NA	NA	NA	NA		NA	NA		0	0	0	0	0	3	0	0	0	0	0	0	0	0	0	1	0	0			-0.267261	-0.267261	-0.267261	-0.267261	-0.267261	3.74166	-0.267261	-0.267261	-0.267261	-0.267261	-0.267261	-0.267261	-0.267261	-0.267261
OG0015863	N	N	Y		0	0		NA	NA	NA	NA		NA	NA		0	0	0	0	0	0	0	0	0	0	0	0	0	0	0	1	3	0			#NUM!	#NUM!	#NUM!	#NUM!	#NUM!	#NUM!	#NUM!	#NUM!	#NUM!	#NUM!	#NUM!	#NUM!	#NUM!	#NUM!
OG0015865	N	N	Y		0	0		NA	NA	NA	NA		NA	NA		0	0	0	0	0	0	0	0	3	0	0	0	0	0	0	1	0	0			-0.267261	-0.267261	-0.267261	-0.267261	-0.267261	-0.267261	-0.267261	-0.267261	3.74166	-0.267261	-0.267261	-0.267261	-0.267261	-0.267261
OG0015866	N	N	Y		0	0		NA	NA	NA	NA		NA	NA		0	0	0	0	0	2	0	0	0	0	0	0	0	0	0	1	1	0			-0.267261	-0.267261	-0.267261	-0.267261	-0.267261	3.74166	-0.267261	-0.267261	-0.267261	-0.267261	-0.267261	-0.267261	-0.267261	-0.267261
OG0015867	N	N	Y		0	0		NA	NA	NA	NA		NA	NA		0	1	0	0	0	0	0	0	0	0	0	0	0	0	0	1	2	0			-0.267261	3.74166	-0.267261	-0.267261	-0.267261	-0.267261	-0.267261	-0.267261	-0.267261	-0.267261	-0.267261	-0.267261	-0.267261	-0.267261
OG0015869	N	N	Y		0	0		NA	NA	NA	NA		NA	NA		0	0	0	0	0	0	0	0	0	0	0	0	0	0	0	2	2	0			#NUM!	#NUM!	#NUM!	#NUM!	#NUM!	#NUM!	#NUM!	#NUM!	#NUM!	#NUM!	#NUM!	#NUM!	#NUM!	#NUM!
OG0015873	N	N	Y		0	0		NA	NA	NA	NA		NA	NA		0	0	0	0	0	0	0	0	0	0	0	0	0	0	0	1	3	0			#NUM!	#NUM!	#NUM!	#NUM!	#NUM!	#NUM!	#NUM!	#NUM!	#NUM!	#NUM!	#NUM!	#NUM!	#NUM!	#NUM!
OG0015877	N	N	Y		0	0		NA	NA	NA	NA		NA	NA		0	0	0	0	0	0	0	0	0	0	3	0	0	0	0	1	0	0			-0.267261	-0.267261	-0.267261	-0.267261	-0.267261	-0.267261	-0.267261	-0.267261	-0.267261	-0.267261	3.74166	-0.267261	-0.267261	-0.267261
OG0015879	N	N	Y		0	0		NA	NA	NA	NA		NA	NA		0	0	0	0	0	0	0	0	0	0	0	0	0	0	0	1	0	3			#NUM!	#NUM!	#NUM!	#NUM!	#NUM!	#NUM!	#NUM!	#NUM!	#NUM!	#NUM!	#NUM!	#NUM!	#NUM!	#NUM!
OG0015880	N	N	Y		0	0		NA	NA	NA	NA		NA	NA		0	0	0	0	0	0	0	0	0	1	0	0	0	0	0	1	2	0			-0.267261	-0.267261	-0.267261	-0.267261	-0.267261	-0.267261	-0.267261	-0.267261	-0.267261	3.74166	-0.267261	-0.267261	-0.267261	-0.267261
OG0015885	N	N	Y		0	0		NA	NA	NA	NA		NA	NA		0	0	0	0	0	0	0	2	0	0	0	0	0	0	0	2	0	0			-0.267261	-0.267261	-0.267261	-0.267261	-0.267261	-0.267261	-0.267261	3.74166	-0.267261	-0.267261	-0.267261	-0.267261	-0.267261	-0.267261
OG0015888	N	N	Y		0	0		NA	NA	NA	NA		NA	NA		0	0	0	0	0	3	0	0	0	0	0	0	0	0	0	1	0	0			-0.267261	-0.267261	-0.267261	-0.267261	-0.267261	3.74166	-0.267261	-0.267261	-0.267261	-0.267261	-0.267261	-0.267261	-0.267261	-0.267261
OG0015891	N	N	Y		0	0		NA	NA	NA	NA		NA	NA		0	0	0	0	0	0	0	0	0	2	0	0	0	0	0	2	0	0			-0.267261	-0.267261	-0.267261	-0.267261	-0.267261	-0.267261	-0.267261	-0.267261	-0.267261	3.74166	-0.267261	-0.267261	-0.267261	-0.267261
OG0015893	N	N	Y		0	0		NA	NA	NA	NA		NA	NA		0	0	0	0	0	0	0	0	0	0	0	0	0	0	0	2	0	2			#NUM!	#NUM!	#NUM!	#NUM!	#NUM!	#NUM!	#NUM!	#NUM!	#NUM!	#NUM!	#NUM!	#NUM!	#NUM!	#NUM!
OG0015898	N	N	Y		0	0		NA	NA	NA	NA		NA	NA		0	0	0	0	0	0	0	1	0	0	0	0	0	0	0	2	1	0			-0.267261	-0.267261	-0.267261	-0.267261	-0.267261	-0.267261	-0.267261	3.74166	-0.267261	-0.267261	-0.267261	-0.267261	-0.267261	-0.267261
OG0015902	N	N	Y		0	0		NA	NA	NA	NA		NA	NA		0	0	0	0	0	0	0	0	0	1	0	0	0	0	0	1	1	1			-0.267261	-0.267261	-0.267261	-0.267261	-0.267261	-0.267261	-0.267261	-0.267261	-0.267261	3.74166	-0.267261	-0.267261	-0.267261	-0.267261
OG0015934	N	N	Y		0	0		NA	NA	NA	NA		NA	NA		0	0	4	0	0	0	0	0	0	0	0	0	0	0	0	0	0	0			-0.267261	-0.267261	3.74166	-0.267261	-0.267261	-0.267261	-0.267261	-0.267261	-0.267261	-0.267261	-0.267261	-0.267261	-0.267261	-0.267261
OG0015936	N	N	Y		0	0		NA	NA	NA	NA		NA	NA		0	0	4	0	0	0	0	0	0	0	0	0	0	0	0	0	0	0			-0.267261	-0.267261	3.74166	-0.267261	-0.267261	-0.267261	-0.267261	-0.267261	-0.267261	-0.267261	-0.267261	-0.267261	-0.267261	-0.267261
OG0015937	N	N	Y		0	0		NA	NA	NA	NA		NA	NA		0	0	4	0	0	0	0	0	0	0	0	0	0	0	0	0	0	0			-0.267261	-0.267261	3.74166	-0.267261	-0.267261	-0.267261	-0.267261	-0.267261	-0.267261	-0.267261	-0.267261	-0.267261	-0.267261	-0.267261
OG0015940	N	N	Y		0	0		NA	NA	NA	NA		NA	NA		0	0	4	0	0	0	0	0	0	0	0	0	0	0	0	0	0	0			-0.267261	-0.267261	3.74166	-0.267261	-0.267261	-0.267261	-0.267261	-0.267261	-0.267261	-0.267261	-0.267261	-0.267261	-0.267261	-0.267261
OG0015945	N	N	Y		0	0		NA	NA	NA	NA		NA	NA		0	0	4	0	0	0	0	0	0	0	0	0	0	0	0	0	0	0			-0.267261	-0.267261	3.74166	-0.267261	-0.267261	-0.267261	-0.267261	-0.267261	-0.267261	-0.267261	-0.267261	-0.267261	-0.267261	-0.267261
OG0015948	N	N	Y		0	0		NA	NA	NA	NA		NA	NA		0	0	4	0	0	0	0	0	0	0	0	0	0	0	0	0	0	0			-0.267261	-0.267261	3.74166	-0.267261	-0.267261	-0.267261	-0.267261	-0.267261	-0.267261	-0.267261	-0.267261	-0.267261	-0.267261	-0.267261
OG0015971	N	N	Y		0	0		NA	NA	NA	NA		NA	NA		0	0	4	0	0	0	0	0	0	0	0	0	0	0	0	0	0	0			-0.267261	-0.267261	3.74166	-0.267261	-0.267261	-0.267261	-0.267261	-0.267261	-0.267261	-0.267261	-0.267261	-0.267261	-0.267261	-0.267261
OG0015998	N	N	Y		0	0		NA	NA	NA	NA		NA	NA		0	0	4	0	0	0	0	0	0	0	0	0	0	0	0	0	0	0			-0.267261	-0.267261	3.74166	-0.267261	-0.267261	-0.267261	-0.267261	-0.267261	-0.267261	-0.267261	-0.267261	-0.267261	-0.267261	-0.267261
OG0016020	N	N	Y		0	0		NA	NA	NA	NA		NA	NA		0	0	4	0	0	0	0	0	0	0	0	0	0	0	0	0	0	0			-0.267261	-0.267261	3.74166	-0.267261	-0.267261	-0.267261	-0.267261	-0.267261	-0.267261	-0.267261	-0.267261	-0.267261	-0.267261	-0.267261
OG0016026	N	N	Y		0	0		NA	NA	NA	NA		NA	NA		0	0	4	0	0	0	0	0	0	0	0	0	0	0	0	0	0	0			-0.267261	-0.267261	3.74166	-0.267261	-0.267261	-0.267261	-0.267261	-0.267261	-0.267261	-0.267261	-0.267261	-0.267261	-0.267261	-0.267261
OG0016041	N	N	Y		0	0		NA	NA	NA	NA		NA	NA		0	0	4	0	0	0	0	0	0	0	0	0	0	0	0	0	0	0			-0.267261	-0.267261	3.74166	-0.267261	-0.267261	-0.267261	-0.267261	-0.267261	-0.267261	-0.267261	-0.267261	-0.267261	-0.267261	-0.267261
OG0016051	N	N	Y		0	0		NA	NA	NA	NA		NA	NA		0	0	0	0	0	0	0	0	0	0	0	4	0	0	0	0	0	0			-0.267261	-0.267261	-0.267261	-0.267261	-0.267261	-0.267261	-0.267261	-0.267261	-0.267261	-0.267261	-0.267261	3.74166	-0.267261	-0.267261
OG0016052	N	N	Y		0	0		NA	NA	NA	NA		NA	NA		0	0	0	0	0	0	0	0	0	0	0	4	0	0	0	0	0	0			-0.267261	-0.267261	-0.267261	-0.267261	-0.267261	-0.267261	-0.267261	-0.267261	-0.267261	-0.267261	-0.267261	3.74166	-0.267261	-0.267261
OG0016055	N	N	Y		0	0		NA	NA	NA	NA		NA	NA		0	0	0	0	0	0	0	0	0	0	0	4	0	0	0	0	0	0			-0.267261	-0.267261	-0.267261	-0.267261	-0.267261	-0.267261	-0.267261	-0.267261	-0.267261	-0.267261	-0.267261	3.74166	-0.267261	-0.267261
OG0016057	N	N	Y		0	0		NA	NA	NA	NA		NA	NA		0	0	0	0	0	0	0	0	0	0	0	4	0	0	0	0	0	0			-0.267261	-0.267261	-0.267261	-0.267261	-0.267261	-0.267261	-0.267261	-0.267261	-0.267261	-0.267261	-0.267261	3.74166	-0.267261	-0.267261
OG0016058	N	N	Y		0	0		NA	NA	NA	NA		NA	NA		0	0	0	0	0	0	0	0	0	0	0	4	0	0	0	0	0	0			-0.267261	-0.267261	-0.267261	-0.267261	-0.267261	-0.267261	-0.267261	-0.267261	-0.267261	-0.267261	-0.267261	3.74166	-0.267261	-0.267261
OG0016066	N	N	Y		0	0		NA	NA	NA	NA		NA	NA		0	0	0	0	0	0	0	0	0	0	0	4	0	0	0	0	0	0			-0.267261	-0.267261	-0.267261	-0.267261	-0.267261	-0.267261	-0.267261	-0.267261	-0.267261	-0.267261	-0.267261	3.74166	-0.267261	-0.267261
OG0016078	N	N	Y		0	0		NA	NA	NA	NA		NA	NA		0	0	0	0	0	0	0	0	0	0	0	1	0	0	0	0	0	3			-0.267261	-0.267261	-0.267261	-0.267261	-0.267261	-0.267261	-0.267261	-0.267261	-0.267261	-0.267261	-0.267261	3.74166	-0.267261	-0.267261
OG0016084	N	N	Y		0	0		NA	NA	NA	NA		NA	NA		0	0	0	0	0	0	0	0	0	0	0	4	0	0	0	0	0	0			-0.267261	-0.267261	-0.267261	-0.267261	-0.267261	-0.267261	-0.267261	-0.267261	-0.267261	-0.267261	-0.267261	3.74166	-0.267261	-0.267261
OG0016088	N	N	Y		0	0		NA	NA	NA	NA		NA	NA		0	0	0	0	0	0	0	0	0	0	0	1	0	0	0	0	0	3			-0.267261	-0.267261	-0.267261	-0.267261	-0.267261	-0.267261	-0.267261	-0.267261	-0.267261	-0.267261	-0.267261	3.74166	-0.267261	-0.267261
OG0016100	N	N	Y		0	0		NA	NA	NA	NA		NA	NA		0	0	0	0	0	0	0	0	0	0	0	1	0	0	0	0	0	3			-0.267261	-0.267261	-0.267261	-0.267261	-0.267261	-0.267261	-0.267261	-0.267261	-0.267261	-0.267261	-0.267261	3.74166	-0.267261	-0.267261
OG0016102	N	N	Y		0	0		NA	NA	NA	NA		NA	NA		0	0	0	0	0	0	0	0	0	0	0	1	0	0	0	0	0	3			-0.267261	-0.267261	-0.267261	-0.267261	-0.267261	-0.267261	-0.267261	-0.267261	-0.267261	-0.267261	-0.267261	3.74166	-0.267261	-0.267261
OG0016103	N	N	Y		0	0		NA	NA	NA	NA		NA	NA		0	0	0	0	0	0	0	0	0	0	0	1	0	0	0	0	0	3			-0.267261	-0.267261	-0.267261	-0.267261	-0.267261	-0.267261	-0.267261	-0.267261	-0.267261	-0.267261	-0.267261	3.74166	-0.267261	-0.267261
OG0016115	N	N	Y		0	0		NA	NA	NA	NA		NA	NA		0	0	0	0	0	0	0	0	0	0	0	2	0	0	0	0	2	0			-0.267261	-0.267261	-0.267261	-0.267261	-0.267261	-0.267261	-0.267261	-0.267261	-0.267261	-0.267261	-0.267261	3.74166	-0.267261	-0.267261
OG0016118	N	N	Y		0	0		NA	NA	NA	NA		NA	NA		0	0	0	0	0	0	0	0	0	1	0	0	0	0	0	0	3	0			-0.267261	-0.267261	-0.267261	-0.267261	-0.267261	-0.267261	-0.267261	-0.267261	-0.267261	3.74166	-0.267261	-0.267261	-0.267261	-0.267261
OG0016121	N	N	Y		0	0		NA	NA	NA	NA		NA	NA		0	0	0	0	0	0	0	0	0	2	0	0	0	0	0	0	2	0			-0.267261	-0.267261	-0.267261	-0.267261	-0.267261	-0.267261	-0.267261	-0.267261	-0.267261	3.74166	-0.267261	-0.267261	-0.267261	-0.267261
OG0016123	N	N	Y		0	0		NA	NA	NA	NA		NA	NA		0	0	0	0	0	0	0	0	0	2	0	0	0	0	0	0	0	2			-0.267261	-0.267261	-0.267261	-0.267261	-0.267261	-0.267261	-0.267261	-0.267261	-0.267261	3.74166	-0.267261	-0.267261	-0.267261	-0.267261
OG0016124	N	N	Y		0	0		NA	NA	NA	NA		NA	NA		0	0	0	0	0	0	0	0	0	1	0	0	0	0	0	0	3	0			-0.267261	-0.267261	-0.267261	-0.267261	-0.267261	-0.267261	-0.267261	-0.267261	-0.267261	3.74166	-0.267261	-0.267261	-0.267261	-0.267261
OG0016125	N	N	Y		0	0		NA	NA	NA	NA		NA	NA		0	0	0	0	0	0	0	0	0	2	0	0	0	0	0	0	2	0			-0.267261	-0.267261	-0.267261	-0.267261	-0.267261	-0.267261	-0.267261	-0.267261	-0.267261	3.74166	-0.267261	-0.267261	-0.267261	-0.267261
OG0016126	N	N	Y		0	0		NA	NA	NA	NA		NA	NA		0	0	0	0	0	0	0	0	0	4	0	0	0	0	0	0	0	0			-0.267261	-0.267261	-0.267261	-0.267261	-0.267261	-0.267261	-0.267261	-0.267261	-0.267261	3.74166	-0.267261	-0.267261	-0.267261	-0.267261
OG0016127	N	N	Y		0	0		NA	NA	NA	NA		NA	NA		0	0	0	0	0	0	0	0	0	4	0	0	0	0	0	0	0	0			-0.267261	-0.267261	-0.267261	-0.267261	-0.267261	-0.267261	-0.267261	-0.267261	-0.267261	3.74166	-0.267261	-0.267261	-0.267261	-0.267261
OG0016129	N	N	Y		0	0		NA	NA	NA	NA		NA	NA		0	0	0	0	0	0	0	0	0	1	0	0	0	0	0	0	3	0			-0.267261	-0.267261	-0.267261	-0.267261	-0.267261	-0.267261	-0.267261	-0.267261	-0.267261	3.74166	-0.267261	-0.267261	-0.267261	-0.267261
OG0016132	N	N	Y		0	0		NA	NA	NA	NA		NA	NA		0	0	0	0	0	0	0	0	0	4	0	0	0	0	0	0	0	0			-0.267261	-0.267261	-0.267261	-0.267261	-0.267261	-0.267261	-0.267261	-0.267261	-0.267261	3.74166	-0.267261	-0.267261	-0.267261	-0.267261
OG0016134	N	N	Y		0	0		NA	NA	NA	NA		NA	NA		0	0	0	0	0	0	0	0	0	4	0	0	0	0	0	0	0	0			-0.267261	-0.267261	-0.267261	-0.267261	-0.267261	-0.267261	-0.267261	-0.267261	-0.267261	3.74166	-0.267261	-0.267261	-0.267261	-0.267261
OG0016135	N	N	Y		0	0		NA	NA	NA	NA		NA	NA		0	0	0	0	0	0	0	0	0	4	0	0	0	0	0	0	0	0			-0.267261	-0.267261	-0.267261	-0.267261	-0.267261	-0.267261	-0.267261	-0.267261	-0.267261	3.74166	-0.267261	-0.267261	-0.267261	-0.267261
OG0016138	N	N	Y		0	0		NA	NA	NA	NA		NA	NA		0	0	0	0	0	0	0	0	0	4	0	0	0	0	0	0	0	0			-0.267261	-0.267261	-0.267261	-0.267261	-0.267261	-0.267261	-0.267261	-0.267261	-0.267261	3.74166	-0.267261	-0.267261	-0.267261	-0.267261
OG0016139	N	N	Y		0	0		NA	NA	NA	NA		NA	NA		0	0	0	0	0	0	0	0	0	4	0	0	0	0	0	0	0	0			-0.267261	-0.267261	-0.267261	-0.267261	-0.267261	-0.267261	-0.267261	-0.267261	-0.267261	3.74166	-0.267261	-0.267261	-0.267261	-0.267261
OG0016140	N	N	Y		0	0		NA	NA	NA	NA		NA	NA		0	0	0	0	0	0	0	0	0	4	0	0	0	0	0	0	0	0			-0.267261	-0.267261	-0.267261	-0.267261	-0.267261	-0.267261	-0.267261	-0.267261	-0.267261	3.74166	-0.267261	-0.267261	-0.267261	-0.267261
OG0016150	N	N	Y		0	0		NA	NA	NA	NA		NA	NA		0	0	0	0	0	0	0	0	0	4	0	0	0	0	0	0	0	0			-0.267261	-0.267261	-0.267261	-0.267261	-0.267261	-0.267261	-0.267261	-0.267261	-0.267261	3.74166	-0.267261	-0.267261	-0.267261	-0.267261
OG0016154	N	N	Y		0	0		NA	NA	NA	NA		NA	NA		0	0	0	0	0	0	0	0	0	1	0	0	0	0	0	0	3	0			-0.267261	-0.267261	-0.267261	-0.267261	-0.267261	-0.267261	-0.267261	-0.267261	-0.267261	3.74166	-0.267261	-0.267261	-0.267261	-0.267261
OG0016156	N	N	Y		0	0		NA	NA	NA	NA		NA	NA		0	0	0	0	0	0	0	0	0	2	0	0	0	0	0	0	2	0			-0.267261	-0.267261	-0.267261	-0.267261	-0.267261	-0.267261	-0.267261	-0.267261	-0.267261	3.74166	-0.267261	-0.267261	-0.267261	-0.267261
OG0016162	N	N	Y		0	0		NA	NA	NA	NA		NA	NA		0	0	0	0	0	0	0	0	0	4	0	0	0	0	0	0	0	0			-0.267261	-0.267261	-0.267261	-0.267261	-0.267261	-0.267261	-0.267261	-0.267261	-0.267261	3.74166	-0.267261	-0.267261	-0.267261	-0.267261
OG0016164	N	N	Y		0	0		NA	NA	NA	NA		NA	NA		0	0	0	0	0	0	0	0	0	4	0	0	0	0	0	0	0	0			-0.267261	-0.267261	-0.267261	-0.267261	-0.267261	-0.267261	-0.267261	-0.267261	-0.267261	3.74166	-0.267261	-0.267261	-0.267261	-0.267261
OG0016178	N	N	Y		0	0		NA	NA	NA	NA		NA	NA		0	0	0	0	0	0	0	0	0	4	0	0	0	0	0	0	0	0			-0.267261	-0.267261	-0.267261	-0.267261	-0.267261	-0.267261	-0.267261	-0.267261	-0.267261	3.74166	-0.267261	-0.267261	-0.267261	-0.267261
OG0016180	N	N	Y		0	0		NA	NA	NA	NA		NA	NA		0	0	0	0	0	0	0	0	0	2	0	0	0	0	0	0	2	0			-0.267261	-0.267261	-0.267261	-0.267261	-0.267261	-0.267261	-0.267261	-0.267261	-0.267261	3.74166	-0.267261	-0.267261	-0.267261	-0.267261
OG0016186	N	N	Y		0	0		NA	NA	NA	NA		NA	NA		0	0	0	0	0	0	0	0	0	1	0	0	0	0	0	0	3	0			-0.267261	-0.267261	-0.267261	-0.267261	-0.267261	-0.267261	-0.267261	-0.267261	-0.267261	3.74166	-0.267261	-0.267261	-0.267261	-0.267261
OG0016190	N	N	Y		0	0		NA	NA	NA	NA		NA	NA		0	0	0	0	0	0	0	0	0	1	0	0	0	0	0	0	3	0			-0.267261	-0.267261	-0.267261	-0.267261	-0.267261	-0.267261	-0.267261	-0.267261	-0.267261	3.74166	-0.267261	-0.267261	-0.267261	-0.267261
OG0016199	N	N	Y		0	0		NA	NA	NA	NA		NA	NA		0	0	0	0	0	0	0	0	0	1	0	0	0	0	0	0	3	0			-0.267261	-0.267261	-0.267261	-0.267261	-0.267261	-0.267261	-0.267261	-0.267261	-0.267261	3.74166	-0.267261	-0.267261	-0.267261	-0.267261
OG0016208	N	N	Y		0	0		NA	NA	NA	NA		NA	NA		0	0	0	0	0	0	0	0	0	1	0	0	0	0	0	0	3	0			-0.267261	-0.267261	-0.267261	-0.267261	-0.267261	-0.267261	-0.267261	-0.267261	-0.267261	3.74166	-0.267261	-0.267261	-0.267261	-0.267261
OG0016219	N	N	Y		0	0		NA	NA	NA	NA		NA	NA		0	0	0	0	0	0	0	0	4	0	0	0	0	0	0	0	0	0			-0.267261	-0.267261	-0.267261	-0.267261	-0.267261	-0.267261	-0.267261	-0.267261	3.74166	-0.267261	-0.267261	-0.267261	-0.267261	-0.267261
OG0016226	N	N	Y		0	0		NA	NA	NA	NA		NA	NA		0	0	0	0	0	0	0	0	4	0	0	0	0	0	0	0	0	0			-0.267261	-0.267261	-0.267261	-0.267261	-0.267261	-0.267261	-0.267261	-0.267261	3.74166	-0.267261	-0.267261	-0.267261	-0.267261	-0.267261
OG0016227	N	N	Y		0	0		NA	NA	NA	NA		NA	NA		0	0	0	0	0	0	0	0	4	0	0	0	0	0	0	0	0	0			-0.267261	-0.267261	-0.267261	-0.267261	-0.267261	-0.267261	-0.267261	-0.267261	3.74166	-0.267261	-0.267261	-0.267261	-0.267261	-0.267261
OG0016230	N	N	Y		0	0		NA	NA	NA	NA		NA	NA		0	0	0	0	0	0	0	0	4	0	0	0	0	0	0	0	0	0			-0.267261	-0.267261	-0.267261	-0.267261	-0.267261	-0.267261	-0.267261	-0.267261	3.74166	-0.267261	-0.267261	-0.267261	-0.267261	-0.267261
OG0016238	N	N	Y		0	0		NA	NA	NA	NA		NA	NA		0	0	0	0	0	0	0	0	3	0	0	0	0	0	0	0	1	0			-0.267261	-0.267261	-0.267261	-0.267261	-0.267261	-0.267261	-0.267261	-0.267261	3.74166	-0.267261	-0.267261	-0.267261	-0.267261	-0.267261
OG0016241	N	N	Y		0	0		NA	NA	NA	NA		NA	NA		0	0	0	0	0	0	0	0	4	0	0	0	0	0	0	0	0	0			-0.267261	-0.267261	-0.267261	-0.267261	-0.267261	-0.267261	-0.267261	-0.267261	3.74166	-0.267261	-0.267261	-0.267261	-0.267261	-0.267261
OG0016246	N	N	Y		0	0		NA	NA	NA	NA		NA	NA		0	0	0	0	0	0	0	0	3	0	0	0	0	0	0	0	1	0			-0.267261	-0.267261	-0.267261	-0.267261	-0.267261	-0.267261	-0.267261	-0.267261	3.74166	-0.267261	-0.267261	-0.267261	-0.267261	-0.267261
OG0016249	N	N	Y		0	0		NA	NA	NA	NA		NA	NA		0	0	0	0	0	0	0	0	1	0	0	0	0	0	0	0	1	2			-0.267261	-0.267261	-0.267261	-0.267261	-0.267261	-0.267261	-0.267261	-0.267261	3.74166	-0.267261	-0.267261	-0.267261	-0.267261	-0.267261
OG0016253	N	N	Y		0	0		NA	NA	NA	NA		NA	NA		0	0	0	0	0	0	0	0	4	0	0	0	0	0	0	0	0	0			-0.267261	-0.267261	-0.267261	-0.267261	-0.267261	-0.267261	-0.267261	-0.267261	3.74166	-0.267261	-0.267261	-0.267261	-0.267261	-0.267261
OG0016254	N	N	Y		0	0		NA	NA	NA	NA		NA	NA		0	0	0	0	0	0	0	0	4	0	0	0	0	0	0	0	0	0			-0.267261	-0.267261	-0.267261	-0.267261	-0.267261	-0.267261	-0.267261	-0.267261	3.74166	-0.267261	-0.267261	-0.267261	-0.267261	-0.267261
OG0016255	N	N	Y		0	0		NA	NA	NA	NA		NA	NA		0	0	0	0	0	0	0	0	4	0	0	0	0	0	0	0	0	0			-0.267261	-0.267261	-0.267261	-0.267261	-0.267261	-0.267261	-0.267261	-0.267261	3.74166	-0.267261	-0.267261	-0.267261	-0.267261	-0.267261
OG0016264	N	N	Y		0	0		NA	NA	NA	NA		NA	NA		0	0	0	0	0	0	0	0	4	0	0	0	0	0	0	0	0	0			-0.267261	-0.267261	-0.267261	-0.267261	-0.267261	-0.267261	-0.267261	-0.267261	3.74166	-0.267261	-0.267261	-0.267261	-0.267261	-0.267261
OG0016284	N	N	Y		0	0		NA	NA	NA	NA		NA	NA		0	0	0	0	0	0	0	0	4	0	0	0	0	0	0	0	0	0			-0.267261	-0.267261	-0.267261	-0.267261	-0.267261	-0.267261	-0.267261	-0.267261	3.74166	-0.267261	-0.267261	-0.267261	-0.267261	-0.267261
OG0016296	N	N	Y		0	0		NA	NA	NA	NA		NA	NA		0	0	0	0	0	0	0	0	4	0	0	0	0	0	0	0	0	0			-0.267261	-0.267261	-0.267261	-0.267261	-0.267261	-0.267261	-0.267261	-0.267261	3.74166	-0.267261	-0.267261	-0.267261	-0.267261	-0.267261
OG0016305	N	N	Y		0	0		NA	NA	NA	NA		NA	NA		0	0	0	0	0	0	0	0	4	0	0	0	0	0	0	0	0	0			-0.267261	-0.267261	-0.267261	-0.267261	-0.267261	-0.267261	-0.267261	-0.267261	3.74166	-0.267261	-0.267261	-0.267261	-0.267261	-0.267261
OG0016310	N	N	Y		0	0		NA	NA	NA	NA		NA	NA		0	0	0	0	0	0	0	0	4	0	0	0	0	0	0	0	0	0			-0.267261	-0.267261	-0.267261	-0.267261	-0.267261	-0.267261	-0.267261	-0.267261	3.74166	-0.267261	-0.267261	-0.267261	-0.267261	-0.267261
OG0016325	N	N	Y		0	0		NA	NA	NA	NA		NA	NA		0	0	0	0	0	0	0	0	1	0	0	0	0	0	0	0	0	3			-0.267261	-0.267261	-0.267261	-0.267261	-0.267261	-0.267261	-0.267261	-0.267261	3.74166	-0.267261	-0.267261	-0.267261	-0.267261	-0.267261
OG0016350	N	N	Y		0	0		NA	NA	NA	NA		NA	NA		0	0	0	0	0	0	0	0	4	0	0	0	0	0	0	0	0	0			-0.267261	-0.267261	-0.267261	-0.267261	-0.267261	-0.267261	-0.267261	-0.267261	3.74166	-0.267261	-0.267261	-0.267261	-0.267261	-0.267261
OG0016366	N	N	Y		0	0		NA	NA	NA	NA		NA	NA		0	0	0	0	0	0	0	0	4	0	0	0	0	0	0	0	0	0			-0.267261	-0.267261	-0.267261	-0.267261	-0.267261	-0.267261	-0.267261	-0.267261	3.74166	-0.267261	-0.267261	-0.267261	-0.267261	-0.267261
OG0016382	N	N	Y		0	0		NA	NA	NA	NA		NA	NA		0	0	0	0	0	0	0	0	1	0	0	0	0	0	0	0	3	0			-0.267261	-0.267261	-0.267261	-0.267261	-0.267261	-0.267261	-0.267261	-0.267261	3.74166	-0.267261	-0.267261	-0.267261	-0.267261	-0.267261
OG0016383	N	N	Y		0	0		NA	NA	NA	NA		NA	NA		0	0	0	0	0	0	0	0	4	0	0	0	0	0	0	0	0	0			-0.267261	-0.267261	-0.267261	-0.267261	-0.267261	-0.267261	-0.267261	-0.267261	3.74166	-0.267261	-0.267261	-0.267261	-0.267261	-0.267261
OG0016388	N	N	Y		0	0		NA	NA	NA	NA		NA	NA		0	0	0	0	0	0	0	0	1	0	0	0	0	0	0	0	0	3			-0.267261	-0.267261	-0.267261	-0.267261	-0.267261	-0.267261	-0.267261	-0.267261	3.74166	-0.267261	-0.267261	-0.267261	-0.267261	-0.267261
OG0016389	N	N	Y		0	0		NA	NA	NA	NA		NA	NA		0	0	0	0	0	0	0	0	0	0	4	0	0	0	0	0	0	0			-0.267261	-0.267261	-0.267261	-0.267261	-0.267261	-0.267261	-0.267261	-0.267261	-0.267261	-0.267261	3.74166	-0.267261	-0.267261	-0.267261
OG0016390	N	N	Y		0	0		NA	NA	NA	NA		NA	NA		0	0	0	0	0	0	0	0	0	0	4	0	0	0	0	0	0	0			-0.267261	-0.267261	-0.267261	-0.267261	-0.267261	-0.267261	-0.267261	-0.267261	-0.267261	-0.267261	3.74166	-0.267261	-0.267261	-0.267261
OG0016392	N	N	Y		0	0		NA	NA	NA	NA		NA	NA		0	0	0	0	0	0	0	0	0	0	4	0	0	0	0	0	0	0			-0.267261	-0.267261	-0.267261	-0.267261	-0.267261	-0.267261	-0.267261	-0.267261	-0.267261	-0.267261	3.74166	-0.267261	-0.267261	-0.267261
OG0016393	N	N	Y		0	0		NA	NA	NA	NA		NA	NA		0	0	0	0	0	0	0	0	0	0	4	0	0	0	0	0	0	0			-0.267261	-0.267261	-0.267261	-0.267261	-0.267261	-0.267261	-0.267261	-0.267261	-0.267261	-0.267261	3.74166	-0.267261	-0.267261	-0.267261
OG0016394	N	N	Y		0	0		NA	NA	NA	NA		NA	NA		0	0	0	0	0	0	0	0	0	0	4	0	0	0	0	0	0	0			-0.267261	-0.267261	-0.267261	-0.267261	-0.267261	-0.267261	-0.267261	-0.267261	-0.267261	-0.267261	3.74166	-0.267261	-0.267261	-0.267261
OG0016395	N	N	Y		0	0		NA	NA	NA	NA		NA	NA		0	0	0	0	0	0	0	0	0	0	4	0	0	0	0	0	0	0			-0.267261	-0.267261	-0.267261	-0.267261	-0.267261	-0.267261	-0.267261	-0.267261	-0.267261	-0.267261	3.74166	-0.267261	-0.267261	-0.267261
OG0016396	N	N	Y		0	0		NA	NA	NA	NA		NA	NA		0	0	0	0	0	0	0	0	0	0	4	0	0	0	0	0	0	0			-0.267261	-0.267261	-0.267261	-0.267261	-0.267261	-0.267261	-0.267261	-0.267261	-0.267261	-0.267261	3.74166	-0.267261	-0.267261	-0.267261
OG0016397	N	N	Y		0	0		NA	NA	NA	NA		NA	NA		0	0	0	0	0	0	0	0	0	0	4	0	0	0	0	0	0	0			-0.267261	-0.267261	-0.267261	-0.267261	-0.267261	-0.267261	-0.267261	-0.267261	-0.267261	-0.267261	3.74166	-0.267261	-0.267261	-0.267261
OG0016399	N	N	Y		0	0		NA	NA	NA	NA		NA	NA		0	0	0	0	0	0	0	0	0	0	4	0	0	0	0	0	0	0			-0.267261	-0.267261	-0.267261	-0.267261	-0.267261	-0.267261	-0.267261	-0.267261	-0.267261	-0.267261	3.74166	-0.267261	-0.267261	-0.267261
OG0016401	N	N	Y		0	0		NA	NA	NA	NA		NA	NA		0	0	0	0	0	0	0	0	0	0	4	0	0	0	0	0	0	0			-0.267261	-0.267261	-0.267261	-0.267261	-0.267261	-0.267261	-0.267261	-0.267261	-0.267261	-0.267261	3.74166	-0.267261	-0.267261	-0.267261
OG0016402	N	N	Y		0	0		NA	NA	NA	NA		NA	NA		0	0	0	0	0	0	0	0	0	0	4	0	0	0	0	0	0	0			-0.267261	-0.267261	-0.267261	-0.267261	-0.267261	-0.267261	-0.267261	-0.267261	-0.267261	-0.267261	3.74166	-0.267261	-0.267261	-0.267261
OG0016403	N	N	Y		0	0		NA	NA	NA	NA		NA	NA		0	0	0	0	0	0	0	0	0	0	4	0	0	0	0	0	0	0			-0.267261	-0.267261	-0.267261	-0.267261	-0.267261	-0.267261	-0.267261	-0.267261	-0.267261	-0.267261	3.74166	-0.267261	-0.267261	-0.267261
OG0016405	N	N	Y		0	0		NA	NA	NA	NA		NA	NA		0	0	0	0	0	0	0	0	0	0	4	0	0	0	0	0	0	0			-0.267261	-0.267261	-0.267261	-0.267261	-0.267261	-0.267261	-0.267261	-0.267261	-0.267261	-0.267261	3.74166	-0.267261	-0.267261	-0.267261
OG0016407	N	N	Y		0	0		NA	NA	NA	NA		NA	NA		0	0	0	0	0	0	0	0	0	0	4	0	0	0	0	0	0	0			-0.267261	-0.267261	-0.267261	-0.267261	-0.267261	-0.267261	-0.267261	-0.267261	-0.267261	-0.267261	3.74166	-0.267261	-0.267261	-0.267261
OG0016408	N	N	Y		0	0		NA	NA	NA	NA		NA	NA		0	0	0	0	0	0	0	0	0	0	4	0	0	0	0	0	0	0			-0.267261	-0.267261	-0.267261	-0.267261	-0.267261	-0.267261	-0.267261	-0.267261	-0.267261	-0.267261	3.74166	-0.267261	-0.267261	-0.267261
OG0016409	N	N	Y		0	0		NA	NA	NA	NA		NA	NA		0	0	0	0	0	0	0	0	0	0	4	0	0	0	0	0	0	0			-0.267261	-0.267261	-0.267261	-0.267261	-0.267261	-0.267261	-0.267261	-0.267261	-0.267261	-0.267261	3.74166	-0.267261	-0.267261	-0.267261
OG0016410	N	N	Y		0	0		NA	NA	NA	NA		NA	NA		0	0	0	0	0	0	0	0	0	0	4	0	0	0	0	0	0	0			-0.267261	-0.267261	-0.267261	-0.267261	-0.267261	-0.267261	-0.267261	-0.267261	-0.267261	-0.267261	3.74166	-0.267261	-0.267261	-0.267261
OG0016413	N	N	Y		0	0		NA	NA	NA	NA		NA	NA		0	0	0	0	0	0	0	0	0	0	4	0	0	0	0	0	0	0			-0.267261	-0.267261	-0.267261	-0.267261	-0.267261	-0.267261	-0.267261	-0.267261	-0.267261	-0.267261	3.74166	-0.267261	-0.267261	-0.267261
OG0016414	N	N	Y		0	0		NA	NA	NA	NA		NA	NA		0	0	0	0	0	0	0	0	0	0	4	0	0	0	0	0	0	0			-0.267261	-0.267261	-0.267261	-0.267261	-0.267261	-0.267261	-0.267261	-0.267261	-0.267261	-0.267261	3.74166	-0.267261	-0.267261	-0.267261
OG0016415	N	N	Y		0	0		NA	NA	NA	NA		NA	NA		0	0	0	0	0	0	0	0	0	0	4	0	0	0	0	0	0	0			-0.267261	-0.267261	-0.267261	-0.267261	-0.267261	-0.267261	-0.267261	-0.267261	-0.267261	-0.267261	3.74166	-0.267261	-0.267261	-0.267261
OG0016416	N	N	Y		0	0		NA	NA	NA	NA		NA	NA		0	0	0	0	0	0	0	0	0	0	4	0	0	0	0	0	0	0			-0.267261	-0.267261	-0.267261	-0.267261	-0.267261	-0.267261	-0.267261	-0.267261	-0.267261	-0.267261	3.74166	-0.267261	-0.267261	-0.267261
OG0016417	N	N	Y		0	0		NA	NA	NA	NA		NA	NA		0	0	0	0	0	0	0	0	0	0	4	0	0	0	0	0	0	0			-0.267261	-0.267261	-0.267261	-0.267261	-0.267261	-0.267261	-0.267261	-0.267261	-0.267261	-0.267261	3.74166	-0.267261	-0.267261	-0.267261
OG0016419	N	N	Y		0	0		NA	NA	NA	NA		NA	NA		0	0	0	0	0	0	0	0	0	0	4	0	0	0	0	0	0	0			-0.267261	-0.267261	-0.267261	-0.267261	-0.267261	-0.267261	-0.267261	-0.267261	-0.267261	-0.267261	3.74166	-0.267261	-0.267261	-0.267261
OG0016420	N	N	Y		0	0		NA	NA	NA	NA		NA	NA		0	0	0	0	0	0	0	0	0	0	4	0	0	0	0	0	0	0			-0.267261	-0.267261	-0.267261	-0.267261	-0.267261	-0.267261	-0.267261	-0.267261	-0.267261	-0.267261	3.74166	-0.267261	-0.267261	-0.267261
OG0016421	N	N	Y		0	0		NA	NA	NA	NA		NA	NA		0	0	0	0	0	0	0	0	0	0	4	0	0	0	0	0	0	0			-0.267261	-0.267261	-0.267261	-0.267261	-0.267261	-0.267261	-0.267261	-0.267261	-0.267261	-0.267261	3.74166	-0.267261	-0.267261	-0.267261
OG0016423	N	N	Y		0	0		NA	NA	NA	NA		NA	NA		0	0	0	0	0	0	0	0	0	0	4	0	0	0	0	0	0	0			-0.267261	-0.267261	-0.267261	-0.267261	-0.267261	-0.267261	-0.267261	-0.267261	-0.267261	-0.267261	3.74166	-0.267261	-0.267261	-0.267261
OG0016426	N	N	Y		0	0		NA	NA	NA	NA		NA	NA		0	0	0	0	0	0	0	0	0	0	4	0	0	0	0	0	0	0			-0.267261	-0.267261	-0.267261	-0.267261	-0.267261	-0.267261	-0.267261	-0.267261	-0.267261	-0.267261	3.74166	-0.267261	-0.267261	-0.267261
OG0016427	N	N	Y		0	0		NA	NA	NA	NA		NA	NA		0	0	0	0	0	0	0	0	0	0	4	0	0	0	0	0	0	0			-0.267261	-0.267261	-0.267261	-0.267261	-0.267261	-0.267261	-0.267261	-0.267261	-0.267261	-0.267261	3.74166	-0.267261	-0.267261	-0.267261
OG0016429	N	N	Y		0	0		NA	NA	NA	NA		NA	NA		0	0	0	0	0	0	0	0	0	0	4	0	0	0	0	0	0	0			-0.267261	-0.267261	-0.267261	-0.267261	-0.267261	-0.267261	-0.267261	-0.267261	-0.267261	-0.267261	3.74166	-0.267261	-0.267261	-0.267261
OG0016433	N	N	Y		0	0		NA	NA	NA	NA		NA	NA		0	4	0	0	0	0	0	0	0	0	0	0	0	0	0	0	0	0			-0.267261	3.74166	-0.267261	-0.267261	-0.267261	-0.267261	-0.267261	-0.267261	-0.267261	-0.267261	-0.267261	-0.267261	-0.267261	-0.267261
OG0016449	N	N	Y		0	0		NA	NA	NA	NA		NA	NA		0	4	0	0	0	0	0	0	0	0	0	0	0	0	0	0	0	0			-0.267261	3.74166	-0.267261	-0.267261	-0.267261	-0.267261	-0.267261	-0.267261	-0.267261	-0.267261	-0.267261	-0.267261	-0.267261	-0.267261
OG0016460	N	N	Y		0	0		NA	NA	NA	NA		NA	NA		0	4	0	0	0	0	0	0	0	0	0	0	0	0	0	0	0	0			-0.267261	3.74166	-0.267261	-0.267261	-0.267261	-0.267261	-0.267261	-0.267261	-0.267261	-0.267261	-0.267261	-0.267261	-0.267261	-0.267261
OG0016468	N	N	Y		0	0		NA	NA	NA	NA		NA	NA		0	4	0	0	0	0	0	0	0	0	0	0	0	0	0	0	0	0			-0.267261	3.74166	-0.267261	-0.267261	-0.267261	-0.267261	-0.267261	-0.267261	-0.267261	-0.267261	-0.267261	-0.267261	-0.267261	-0.267261
OG0016478	N	N	Y		0	0		NA	NA	NA	NA		NA	NA		0	1	0	0	0	0	0	0	0	0	0	0	0	0	0	0	3	0			-0.267261	3.74166	-0.267261	-0.267261	-0.267261	-0.267261	-0.267261	-0.267261	-0.267261	-0.267261	-0.267261	-0.267261	-0.267261	-0.267261
OG0016482	N	N	Y		0	0		NA	NA	NA	NA		NA	NA		0	4	0	0	0	0	0	0	0	0	0	0	0	0	0	0	0	0			-0.267261	3.74166	-0.267261	-0.267261	-0.267261	-0.267261	-0.267261	-0.267261	-0.267261	-0.267261	-0.267261	-0.267261	-0.267261	-0.267261
OG0016486	N	N	Y		0	0		NA	NA	NA	NA		NA	NA		0	4	0	0	0	0	0	0	0	0	0	0	0	0	0	0	0	0			-0.267261	3.74166	-0.267261	-0.267261	-0.267261	-0.267261	-0.267261	-0.267261	-0.267261	-0.267261	-0.267261	-0.267261	-0.267261	-0.267261
OG0016492	N	N	Y		0	0		NA	NA	NA	NA		NA	NA		0	4	0	0	0	0	0	0	0	0	0	0	0	0	0	0	0	0			-0.267261	3.74166	-0.267261	-0.267261	-0.267261	-0.267261	-0.267261	-0.267261	-0.267261	-0.267261	-0.267261	-0.267261	-0.267261	-0.267261
OG0016504	N	N	Y		0	0		NA	NA	NA	NA		NA	NA		0	4	0	0	0	0	0	0	0	0	0	0	0	0	0	0	0	0			-0.267261	3.74166	-0.267261	-0.267261	-0.267261	-0.267261	-0.267261	-0.267261	-0.267261	-0.267261	-0.267261	-0.267261	-0.267261	-0.267261
OG0016529	N	N	Y		0	0		NA	NA	NA	NA		NA	NA		0	4	0	0	0	0	0	0	0	0	0	0	0	0	0	0	0	0			-0.267261	3.74166	-0.267261	-0.267261	-0.267261	-0.267261	-0.267261	-0.267261	-0.267261	-0.267261	-0.267261	-0.267261	-0.267261	-0.267261
OG0016573	N	N	Y		0	0		NA	NA	NA	NA		NA	NA		0	0	0	0	0	4	0	0	0	0	0	0	0	0	0	0	0	0			-0.267261	-0.267261	-0.267261	-0.267261	-0.267261	3.74166	-0.267261	-0.267261	-0.267261	-0.267261	-0.267261	-0.267261	-0.267261	-0.267261
OG0016575	N	N	Y		0	0		NA	NA	NA	NA		NA	NA		0	0	0	0	0	4	0	0	0	0	0	0	0	0	0	0	0	0			-0.267261	-0.267261	-0.267261	-0.267261	-0.267261	3.74166	-0.267261	-0.267261	-0.267261	-0.267261	-0.267261	-0.267261	-0.267261	-0.267261
OG0016576	N	N	Y		0	0		NA	NA	NA	NA		NA	NA		0	0	0	0	0	4	0	0	0	0	0	0	0	0	0	0	0	0			-0.267261	-0.267261	-0.267261	-0.267261	-0.267261	3.74166	-0.267261	-0.267261	-0.267261	-0.267261	-0.267261	-0.267261	-0.267261	-0.267261
OG0016584	N	N	Y		0	0		NA	NA	NA	NA		NA	NA		0	0	0	0	0	4	0	0	0	0	0	0	0	0	0	0	0	0			-0.267261	-0.267261	-0.267261	-0.267261	-0.267261	3.74166	-0.267261	-0.267261	-0.267261	-0.267261	-0.267261	-0.267261	-0.267261	-0.267261
OG0016587	N	N	Y		0	0		NA	NA	NA	NA		NA	NA		0	0	0	0	0	4	0	0	0	0	0	0	0	0	0	0	0	0			-0.267261	-0.267261	-0.267261	-0.267261	-0.267261	3.74166	-0.267261	-0.267261	-0.267261	-0.267261	-0.267261	-0.267261	-0.267261	-0.267261
OG0016595	N	N	Y		0	0		NA	NA	NA	NA		NA	NA		0	0	0	0	0	4	0	0	0	0	0	0	0	0	0	0	0	0			-0.267261	-0.267261	-0.267261	-0.267261	-0.267261	3.74166	-0.267261	-0.267261	-0.267261	-0.267261	-0.267261	-0.267261	-0.267261	-0.267261
OG0016597	N	N	Y		0	0		NA	NA	NA	NA		NA	NA		0	0	0	0	0	4	0	0	0	0	0	0	0	0	0	0	0	0			-0.267261	-0.267261	-0.267261	-0.267261	-0.267261	3.74166	-0.267261	-0.267261	-0.267261	-0.267261	-0.267261	-0.267261	-0.267261	-0.267261
OG0016599	N	N	Y		0	0		NA	NA	NA	NA		NA	NA		0	0	0	0	0	4	0	0	0	0	0	0	0	0	0	0	0	0			-0.267261	-0.267261	-0.267261	-0.267261	-0.267261	3.74166	-0.267261	-0.267261	-0.267261	-0.267261	-0.267261	-0.267261	-0.267261	-0.267261
OG0016607	N	N	Y		0	0		NA	NA	NA	NA		NA	NA		0	0	0	0	0	4	0	0	0	0	0	0	0	0	0	0	0	0			-0.267261	-0.267261	-0.267261	-0.267261	-0.267261	3.74166	-0.267261	-0.267261	-0.267261	-0.267261	-0.267261	-0.267261	-0.267261	-0.267261
OG0016608	N	N	Y		0	0		NA	NA	NA	NA		NA	NA		0	0	0	0	0	4	0	0	0	0	0	0	0	0	0	0	0	0			-0.267261	-0.267261	-0.267261	-0.267261	-0.267261	3.74166	-0.267261	-0.267261	-0.267261	-0.267261	-0.267261	-0.267261	-0.267261	-0.267261
OG0016611	N	N	Y		0	0		NA	NA	NA	NA		NA	NA		0	0	0	0	0	4	0	0	0	0	0	0	0	0	0	0	0	0			-0.267261	-0.267261	-0.267261	-0.267261	-0.267261	3.74166	-0.267261	-0.267261	-0.267261	-0.267261	-0.267261	-0.267261	-0.267261	-0.267261
OG0016614	N	N	Y		0	0		NA	NA	NA	NA		NA	NA		0	0	0	0	0	1	0	0	0	0	0	0	0	0	0	0	0	3			-0.267261	-0.267261	-0.267261	-0.267261	-0.267261	3.74166	-0.267261	-0.267261	-0.267261	-0.267261	-0.267261	-0.267261	-0.267261	-0.267261
OG0016616	N	N	Y		0	0		NA	NA	NA	NA		NA	NA		0	0	0	0	0	1	0	0	0	0	0	0	0	0	0	0	3	0			-0.267261	-0.267261	-0.267261	-0.267261	-0.267261	3.74166	-0.267261	-0.267261	-0.267261	-0.267261	-0.267261	-0.267261	-0.267261	-0.267261
OG0016624	N	N	Y		0	0		NA	NA	NA	NA		NA	NA		0	0	0	0	0	4	0	0	0	0	0	0	0	0	0	0	0	0			-0.267261	-0.267261	-0.267261	-0.267261	-0.267261	3.74166	-0.267261	-0.267261	-0.267261	-0.267261	-0.267261	-0.267261	-0.267261	-0.267261
OG0016632	N	N	Y		0	0		NA	NA	NA	NA		NA	NA		0	0	0	0	0	4	0	0	0	0	0	0	0	0	0	0	0	0			-0.267261	-0.267261	-0.267261	-0.267261	-0.267261	3.74166	-0.267261	-0.267261	-0.267261	-0.267261	-0.267261	-0.267261	-0.267261	-0.267261
OG0016640	N	N	Y		0	0		NA	NA	NA	NA		NA	NA		0	0	0	0	0	0	0	0	0	0	0	0	0	0	0	0	4	0			#NUM!	#NUM!	#NUM!	#NUM!	#NUM!	#NUM!	#NUM!	#NUM!	#NUM!	#NUM!	#NUM!	#NUM!	#NUM!	#NUM!
OG0016641	N	N	Y		0	0		NA	NA	NA	NA		NA	NA		0	0	0	0	0	0	0	0	0	0	0	0	0	0	0	0	4	0			#NUM!	#NUM!	#NUM!	#NUM!	#NUM!	#NUM!	#NUM!	#NUM!	#NUM!	#NUM!	#NUM!	#NUM!	#NUM!	#NUM!
OG0016642	N	N	Y		0	0		NA	NA	NA	NA		NA	NA		0	0	0	0	0	0	0	0	0	0	0	0	0	0	0	0	4	0			#NUM!	#NUM!	#NUM!	#NUM!	#NUM!	#NUM!	#NUM!	#NUM!	#NUM!	#NUM!	#NUM!	#NUM!	#NUM!	#NUM!
OG0016643	N	N	Y		0	0		NA	NA	NA	NA		NA	NA		0	0	0	0	0	0	0	0	0	0	0	0	0	0	0	0	4	0			#NUM!	#NUM!	#NUM!	#NUM!	#NUM!	#NUM!	#NUM!	#NUM!	#NUM!	#NUM!	#NUM!	#NUM!	#NUM!	#NUM!
OG0016644	N	N	Y		0	0		NA	NA	NA	NA		NA	NA		0	0	0	0	0	0	0	0	0	0	0	0	0	0	0	0	4	0			#NUM!	#NUM!	#NUM!	#NUM!	#NUM!	#NUM!	#NUM!	#NUM!	#NUM!	#NUM!	#NUM!	#NUM!	#NUM!	#NUM!
OG0016645	N	N	Y		0	0		NA	NA	NA	NA		NA	NA		0	0	0	0	0	0	0	0	0	0	0	0	0	0	0	0	4	0			#NUM!	#NUM!	#NUM!	#NUM!	#NUM!	#NUM!	#NUM!	#NUM!	#NUM!	#NUM!	#NUM!	#NUM!	#NUM!	#NUM!
OG0016646	N	N	Y		0	0		NA	NA	NA	NA		NA	NA		0	0	0	0	0	0	0	0	0	0	0	0	0	0	0	0	4	0			#NUM!	#NUM!	#NUM!	#NUM!	#NUM!	#NUM!	#NUM!	#NUM!	#NUM!	#NUM!	#NUM!	#NUM!	#NUM!	#NUM!
OG0016647	N	N	Y		0	0		NA	NA	NA	NA		NA	NA		0	0	0	0	0	0	0	0	0	0	0	0	0	0	0	0	4	0			#NUM!	#NUM!	#NUM!	#NUM!	#NUM!	#NUM!	#NUM!	#NUM!	#NUM!	#NUM!	#NUM!	#NUM!	#NUM!	#NUM!
OG0016648	N	N	Y		0	0		NA	NA	NA	NA		NA	NA		0	0	0	0	0	0	0	0	0	0	0	0	0	0	0	0	4	0			#NUM!	#NUM!	#NUM!	#NUM!	#NUM!	#NUM!	#NUM!	#NUM!	#NUM!	#NUM!	#NUM!	#NUM!	#NUM!	#NUM!
OG0016649	N	N	Y		0	0		NA	NA	NA	NA		NA	NA		0	0	0	0	0	0	0	0	0	0	0	0	0	0	0	0	4	0			#NUM!	#NUM!	#NUM!	#NUM!	#NUM!	#NUM!	#NUM!	#NUM!	#NUM!	#NUM!	#NUM!	#NUM!	#NUM!	#NUM!
OG0016650	N	N	Y		0	0		NA	NA	NA	NA		NA	NA		0	0	0	0	0	0	0	0	0	0	0	0	0	0	0	0	4	0			#NUM!	#NUM!	#NUM!	#NUM!	#NUM!	#NUM!	#NUM!	#NUM!	#NUM!	#NUM!	#NUM!	#NUM!	#NUM!	#NUM!
OG0016651	N	N	Y		0	0		NA	NA	NA	NA		NA	NA		0	0	0	0	0	0	0	0	0	0	0	0	0	0	0	0	4	0			#NUM!	#NUM!	#NUM!	#NUM!	#NUM!	#NUM!	#NUM!	#NUM!	#NUM!	#NUM!	#NUM!	#NUM!	#NUM!	#NUM!
OG0016652	N	N	Y		0	0		NA	NA	NA	NA		NA	NA		0	0	0	0	0	0	0	0	0	0	0	0	0	0	0	0	4	0			#NUM!	#NUM!	#NUM!	#NUM!	#NUM!	#NUM!	#NUM!	#NUM!	#NUM!	#NUM!	#NUM!	#NUM!	#NUM!	#NUM!
OG0016653	N	N	Y		0	0		NA	NA	NA	NA		NA	NA		0	0	0	0	0	0	0	0	0	0	0	0	0	0	0	0	4	0			#NUM!	#NUM!	#NUM!	#NUM!	#NUM!	#NUM!	#NUM!	#NUM!	#NUM!	#NUM!	#NUM!	#NUM!	#NUM!	#NUM!
OG0016655	N	N	Y		0	0		NA	NA	NA	NA		NA	NA		0	0	0	0	0	0	0	1	0	0	0	0	0	0	0	0	2	1			-0.267261	-0.267261	-0.267261	-0.267261	-0.267261	-0.267261	-0.267261	3.74166	-0.267261	-0.267261	-0.267261	-0.267261	-0.267261	-0.267261
OG0016656	N	N	Y		0	0		NA	NA	NA	NA		NA	NA		0	0	0	0	0	0	0	0	0	0	0	0	0	0	0	0	4	0			#NUM!	#NUM!	#NUM!	#NUM!	#NUM!	#NUM!	#NUM!	#NUM!	#NUM!	#NUM!	#NUM!	#NUM!	#NUM!	#NUM!
OG0016657	N	N	Y		0	0		NA	NA	NA	NA		NA	NA		0	0	0	0	0	0	0	0	0	0	0	0	0	0	0	0	3	1			#NUM!	#NUM!	#NUM!	#NUM!	#NUM!	#NUM!	#NUM!	#NUM!	#NUM!	#NUM!	#NUM!	#NUM!	#NUM!	#NUM!
OG0016658	N	N	Y		0	0		NA	NA	NA	NA		NA	NA		0	0	0	0	0	0	0	0	0	0	0	0	0	0	0	0	4	0			#NUM!	#NUM!	#NUM!	#NUM!	#NUM!	#NUM!	#NUM!	#NUM!	#NUM!	#NUM!	#NUM!	#NUM!	#NUM!	#NUM!
OG0016659	N	N	Y		0	0		NA	NA	NA	NA		NA	NA		0	0	0	0	0	0	0	0	0	0	0	0	0	0	0	0	4	0			#NUM!	#NUM!	#NUM!	#NUM!	#NUM!	#NUM!	#NUM!	#NUM!	#NUM!	#NUM!	#NUM!	#NUM!	#NUM!	#NUM!
OG0016660	N	N	Y		0	0		NA	NA	NA	NA		NA	NA		0	0	0	0	0	0	0	0	0	0	0	0	0	0	0	0	4	0			#NUM!	#NUM!	#NUM!	#NUM!	#NUM!	#NUM!	#NUM!	#NUM!	#NUM!	#NUM!	#NUM!	#NUM!	#NUM!	#NUM!
OG0016661	N	N	Y		0	0		NA	NA	NA	NA		NA	NA		0	0	0	0	0	0	0	0	0	0	0	0	0	0	0	0	4	0			#NUM!	#NUM!	#NUM!	#NUM!	#NUM!	#NUM!	#NUM!	#NUM!	#NUM!	#NUM!	#NUM!	#NUM!	#NUM!	#NUM!
OG0016662	N	N	Y		0	0		NA	NA	NA	NA		NA	NA		0	0	0	0	0	0	0	0	0	0	0	0	0	0	0	0	4	0			#NUM!	#NUM!	#NUM!	#NUM!	#NUM!	#NUM!	#NUM!	#NUM!	#NUM!	#NUM!	#NUM!	#NUM!	#NUM!	#NUM!
OG0016663	N	N	Y		0	0		NA	NA	NA	NA		NA	NA		0	0	0	0	0	0	0	0	0	0	0	0	0	0	0	0	4	0			#NUM!	#NUM!	#NUM!	#NUM!	#NUM!	#NUM!	#NUM!	#NUM!	#NUM!	#NUM!	#NUM!	#NUM!	#NUM!	#NUM!
OG0016664	N	N	Y		0	0		NA	NA	NA	NA		NA	NA		0	0	0	0	0	0	0	0	0	0	0	0	0	0	0	0	4	0			#NUM!	#NUM!	#NUM!	#NUM!	#NUM!	#NUM!	#NUM!	#NUM!	#NUM!	#NUM!	#NUM!	#NUM!	#NUM!	#NUM!
OG0016665	N	N	Y		0	0		NA	NA	NA	NA		NA	NA		0	0	0	0	1	0	0	0	0	0	0	0	0	0	0	0	3	0			-0.267261	-0.267261	-0.267261	-0.267261	3.74166	-0.267261	-0.267261	-0.267261	-0.267261	-0.267261	-0.267261	-0.267261	-0.267261	-0.267261
OG0016666	N	N	Y		0	0		NA	NA	NA	NA		NA	NA		0	0	0	0	0	0	0	0	0	0	0	0	0	0	0	0	4	0			#NUM!	#NUM!	#NUM!	#NUM!	#NUM!	#NUM!	#NUM!	#NUM!	#NUM!	#NUM!	#NUM!	#NUM!	#NUM!	#NUM!
OG0016667	N	N	Y		0	0		NA	NA	NA	NA		NA	NA		0	0	0	0	0	0	0	0	0	0	0	0	0	0	0	0	4	0			#NUM!	#NUM!	#NUM!	#NUM!	#NUM!	#NUM!	#NUM!	#NUM!	#NUM!	#NUM!	#NUM!	#NUM!	#NUM!	#NUM!
OG0016668	N	N	Y		0	0		NA	NA	NA	NA		NA	NA		0	0	0	0	0	0	0	0	0	0	0	0	0	0	0	0	4	0			#NUM!	#NUM!	#NUM!	#NUM!	#NUM!	#NUM!	#NUM!	#NUM!	#NUM!	#NUM!	#NUM!	#NUM!	#NUM!	#NUM!
OG0016669	N	N	Y		0	0		NA	NA	NA	NA		NA	NA		0	0	0	0	0	0	0	0	0	0	0	0	0	0	0	0	4	0			#NUM!	#NUM!	#NUM!	#NUM!	#NUM!	#NUM!	#NUM!	#NUM!	#NUM!	#NUM!	#NUM!	#NUM!	#NUM!	#NUM!
OG0016670	N	N	Y		0	0		NA	NA	NA	NA		NA	NA		1	0	0	0	0	0	0	0	0	0	0	0	0	0	0	0	3	0			3.74166	-0.267261	-0.267261	-0.267261	-0.267261	-0.267261	-0.267261	-0.267261	-0.267261	-0.267261	-0.267261	-0.267261	-0.267261	-0.267261
OG0016672	N	N	Y		0	0		NA	NA	NA	NA		NA	NA		1	0	0	0	0	0	0	0	0	0	0	0	0	0	0	0	2	1			3.74166	-0.267261	-0.267261	-0.267261	-0.267261	-0.267261	-0.267261	-0.267261	-0.267261	-0.267261	-0.267261	-0.267261	-0.267261	-0.267261
OG0016674	N	N	Y		0	0		NA	NA	NA	NA		NA	NA		0	0	0	0	0	0	0	0	0	0	0	0	0	0	0	0	1	3			#NUM!	#NUM!	#NUM!	#NUM!	#NUM!	#NUM!	#NUM!	#NUM!	#NUM!	#NUM!	#NUM!	#NUM!	#NUM!	#NUM!
OG0016675	N	N	Y		0	0		NA	NA	NA	NA		NA	NA		0	0	0	0	4	0	0	0	0	0	0	0	0	0	0	0	0	0			-0.267261	-0.267261	-0.267261	-0.267261	3.74166	-0.267261	-0.267261	-0.267261	-0.267261	-0.267261	-0.267261	-0.267261	-0.267261	-0.267261
OG0016677	N	N	Y		0	0		NA	NA	NA	NA		NA	NA		0	0	0	0	4	0	0	0	0	0	0	0	0	0	0	0	0	0			-0.267261	-0.267261	-0.267261	-0.267261	3.74166	-0.267261	-0.267261	-0.267261	-0.267261	-0.267261	-0.267261	-0.267261	-0.267261	-0.267261
OG0016679	N	N	Y		0	0		NA	NA	NA	NA		NA	NA		0	0	0	0	4	0	0	0	0	0	0	0	0	0	0	0	0	0			-0.267261	-0.267261	-0.267261	-0.267261	3.74166	-0.267261	-0.267261	-0.267261	-0.267261	-0.267261	-0.267261	-0.267261	-0.267261	-0.267261
OG0016680	N	N	Y		0	0		NA	NA	NA	NA		NA	NA		0	0	0	0	4	0	0	0	0	0	0	0	0	0	0	0	0	0			-0.267261	-0.267261	-0.267261	-0.267261	3.74166	-0.267261	-0.267261	-0.267261	-0.267261	-0.267261	-0.267261	-0.267261	-0.267261	-0.267261
OG0016681	N	N	Y		0	0		NA	NA	NA	NA		NA	NA		0	0	0	0	4	0	0	0	0	0	0	0	0	0	0	0	0	0			-0.267261	-0.267261	-0.267261	-0.267261	3.74166	-0.267261	-0.267261	-0.267261	-0.267261	-0.267261	-0.267261	-0.267261	-0.267261	-0.267261
OG0016683	N	N	Y		0	0		NA	NA	NA	NA		NA	NA		0	0	0	0	4	0	0	0	0	0	0	0	0	0	0	0	0	0			-0.267261	-0.267261	-0.267261	-0.267261	3.74166	-0.267261	-0.267261	-0.267261	-0.267261	-0.267261	-0.267261	-0.267261	-0.267261	-0.267261
OG0016684	N	N	Y		0	0		NA	NA	NA	NA		NA	NA		0	0	0	0	4	0	0	0	0	0	0	0	0	0	0	0	0	0			-0.267261	-0.267261	-0.267261	-0.267261	3.74166	-0.267261	-0.267261	-0.267261	-0.267261	-0.267261	-0.267261	-0.267261	-0.267261	-0.267261
OG0016687	N	N	Y		0	0		NA	NA	NA	NA		NA	NA		0	0	0	0	4	0	0	0	0	0	0	0	0	0	0	0	0	0			-0.267261	-0.267261	-0.267261	-0.267261	3.74166	-0.267261	-0.267261	-0.267261	-0.267261	-0.267261	-0.267261	-0.267261	-0.267261	-0.267261
OG0016688	N	N	Y		0	0		NA	NA	NA	NA		NA	NA		0	0	0	0	4	0	0	0	0	0	0	0	0	0	0	0	0	0			-0.267261	-0.267261	-0.267261	-0.267261	3.74166	-0.267261	-0.267261	-0.267261	-0.267261	-0.267261	-0.267261	-0.267261	-0.267261	-0.267261
OG0016689	N	N	Y		0	0		NA	NA	NA	NA		NA	NA		0	0	0	0	4	0	0	0	0	0	0	0	0	0	0	0	0	0			-0.267261	-0.267261	-0.267261	-0.267261	3.74166	-0.267261	-0.267261	-0.267261	-0.267261	-0.267261	-0.267261	-0.267261	-0.267261	-0.267261
OG0016693	N	N	Y		0	0		NA	NA	NA	NA		NA	NA		0	0	0	0	4	0	0	0	0	0	0	0	0	0	0	0	0	0			-0.267261	-0.267261	-0.267261	-0.267261	3.74166	-0.267261	-0.267261	-0.267261	-0.267261	-0.267261	-0.267261	-0.267261	-0.267261	-0.267261
OG0016694	N	N	Y		0	0		NA	NA	NA	NA		NA	NA		0	0	0	0	4	0	0	0	0	0	0	0	0	0	0	0	0	0			-0.267261	-0.267261	-0.267261	-0.267261	3.74166	-0.267261	-0.267261	-0.267261	-0.267261	-0.267261	-0.267261	-0.267261	-0.267261	-0.267261
OG0016849	N	N	Y		0	0		NA	NA	NA	NA		NA	NA		0	0	0	0	0	0	0	0	0	0	0	0	0	1	0	0	0	3			-0.267261	-0.267261	-0.267261	-0.267261	-0.267261	-0.267261	-0.267261	-0.267261	-0.267261	-0.267261	-0.267261	-0.267261	-0.267261	3.74166
OG0016973	N	N	Y		0	0		NA	NA	NA	NA		NA	NA		0	0	0	0	0	0	4	0	0	0	0	0	0	0	0	0	0	0			-0.267261	-0.267261	-0.267261	-0.267261	-0.267261	-0.267261	3.74166	-0.267261	-0.267261	-0.267261	-0.267261	-0.267261	-0.267261	-0.267261
OG0016974	N	N	Y		0	0		NA	NA	NA	NA		NA	NA		0	0	0	0	0	0	4	0	0	0	0	0	0	0	0	0	0	0			-0.267261	-0.267261	-0.267261	-0.267261	-0.267261	-0.267261	3.74166	-0.267261	-0.267261	-0.267261	-0.267261	-0.267261	-0.267261	-0.267261
OG0016975	N	N	Y		0	0		NA	NA	NA	NA		NA	NA		0	0	0	0	0	0	4	0	0	0	0	0	0	0	0	0	0	0			-0.267261	-0.267261	-0.267261	-0.267261	-0.267261	-0.267261	3.74166	-0.267261	-0.267261	-0.267261	-0.267261	-0.267261	-0.267261	-0.267261
OG0016977	N	N	Y		0	0		NA	NA	NA	NA		NA	NA		0	0	0	0	0	0	4	0	0	0	0	0	0	0	0	0	0	0			-0.267261	-0.267261	-0.267261	-0.267261	-0.267261	-0.267261	3.74166	-0.267261	-0.267261	-0.267261	-0.267261	-0.267261	-0.267261	-0.267261
OG0016978	N	N	Y		0	0		NA	NA	NA	NA		NA	NA		0	0	0	0	0	0	4	0	0	0	0	0	0	0	0	0	0	0			-0.267261	-0.267261	-0.267261	-0.267261	-0.267261	-0.267261	3.74166	-0.267261	-0.267261	-0.267261	-0.267261	-0.267261	-0.267261	-0.267261
OG0016979	N	N	Y		0	0		NA	NA	NA	NA		NA	NA		0	0	0	0	0	0	4	0	0	0	0	0	0	0	0	0	0	0			-0.267261	-0.267261	-0.267261	-0.267261	-0.267261	-0.267261	3.74166	-0.267261	-0.267261	-0.267261	-0.267261	-0.267261	-0.267261	-0.267261
OG0016980	N	N	Y		0	0		NA	NA	NA	NA		NA	NA		0	0	0	0	0	0	4	0	0	0	0	0	0	0	0	0	0	0			-0.267261	-0.267261	-0.267261	-0.267261	-0.267261	-0.267261	3.74166	-0.267261	-0.267261	-0.267261	-0.267261	-0.267261	-0.267261	-0.267261
OG0016981	N	N	Y		0	0		NA	NA	NA	NA		NA	NA		0	0	0	0	0	0	4	0	0	0	0	0	0	0	0	0	0	0			-0.267261	-0.267261	-0.267261	-0.267261	-0.267261	-0.267261	3.74166	-0.267261	-0.267261	-0.267261	-0.267261	-0.267261	-0.267261	-0.267261
OG0016982	N	N	Y		0	0		NA	NA	NA	NA		NA	NA		0	0	0	0	0	0	4	0	0	0	0	0	0	0	0	0	0	0			-0.267261	-0.267261	-0.267261	-0.267261	-0.267261	-0.267261	3.74166	-0.267261	-0.267261	-0.267261	-0.267261	-0.267261	-0.267261	-0.267261
OG0016983	N	N	Y		0	0		NA	NA	NA	NA		NA	NA		0	0	0	0	0	0	4	0	0	0	0	0	0	0	0	0	0	0			-0.267261	-0.267261	-0.267261	-0.267261	-0.267261	-0.267261	3.74166	-0.267261	-0.267261	-0.267261	-0.267261	-0.267261	-0.267261	-0.267261
OG0016984	N	N	Y		0	0		NA	NA	NA	NA		NA	NA		0	0	0	0	0	0	4	0	0	0	0	0	0	0	0	0	0	0			-0.267261	-0.267261	-0.267261	-0.267261	-0.267261	-0.267261	3.74166	-0.267261	-0.267261	-0.267261	-0.267261	-0.267261	-0.267261	-0.267261
OG0016985	N	N	Y		0	0		NA	NA	NA	NA		NA	NA		0	0	0	0	0	0	4	0	0	0	0	0	0	0	0	0	0	0			-0.267261	-0.267261	-0.267261	-0.267261	-0.267261	-0.267261	3.74166	-0.267261	-0.267261	-0.267261	-0.267261	-0.267261	-0.267261	-0.267261
OG0016986	N	N	Y		0	0		NA	NA	NA	NA		NA	NA		4	0	0	0	0	0	0	0	0	0	0	0	0	0	0	0	0	0			3.74166	-0.267261	-0.267261	-0.267261	-0.267261	-0.267261	-0.267261	-0.267261	-0.267261	-0.267261	-0.267261	-0.267261	-0.267261	-0.267261
OG0016987	N	N	Y		0	0		NA	NA	NA	NA		NA	NA		4	0	0	0	0	0	0	0	0	0	0	0	0	0	0	0	0	0			3.74166	-0.267261	-0.267261	-0.267261	-0.267261	-0.267261	-0.267261	-0.267261	-0.267261	-0.267261	-0.267261	-0.267261	-0.267261	-0.267261
OG0016988	N	N	Y		0	0		NA	NA	NA	NA		NA	NA		4	0	0	0	0	0	0	0	0	0	0	0	0	0	0	0	0	0			3.74166	-0.267261	-0.267261	-0.267261	-0.267261	-0.267261	-0.267261	-0.267261	-0.267261	-0.267261	-0.267261	-0.267261	-0.267261	-0.267261
OG0016989	N	N	Y		0	0		NA	NA	NA	NA		NA	NA		4	0	0	0	0	0	0	0	0	0	0	0	0	0	0	0	0	0			3.74166	-0.267261	-0.267261	-0.267261	-0.267261	-0.267261	-0.267261	-0.267261	-0.267261	-0.267261	-0.267261	-0.267261	-0.267261	-0.267261
OG0016990	N	N	Y		0	0		NA	NA	NA	NA		NA	NA		0	0	0	0	0	0	0	0	0	0	0	0	0	0	0	0	0	4			#NUM!	#NUM!	#NUM!	#NUM!	#NUM!	#NUM!	#NUM!	#NUM!	#NUM!	#NUM!	#NUM!	#NUM!	#NUM!	#NUM!
OG0016991	N	N	Y		0	0		NA	NA	NA	NA		NA	NA		0	0	0	0	0	0	0	0	0	0	0	0	0	0	1	0	0	3			-0.267261	-0.267261	-0.267261	-0.267261	-0.267261	-0.267261	-0.267261	-0.267261	-0.267261	-0.267261	-0.267261	-0.267261	-0.267261	-0.267261
OG0016992	N	N	Y		0	0		NA	NA	NA	NA		NA	NA		0	0	0	0	0	0	0	0	0	0	0	0	0	0	0	0	0	4			#NUM!	#NUM!	#NUM!	#NUM!	#NUM!	#NUM!	#NUM!	#NUM!	#NUM!	#NUM!	#NUM!	#NUM!	#NUM!	#NUM!
OG0016993	N	N	Y		0	0		NA	NA	NA	NA		NA	NA		0	0	0	0	0	0	0	0	0	0	0	0	0	0	0	0	0	4			#NUM!	#NUM!	#NUM!	#NUM!	#NUM!	#NUM!	#NUM!	#NUM!	#NUM!	#NUM!	#NUM!	#NUM!	#NUM!	#NUM!
OG0016994	N	N	Y		0	0		NA	NA	NA	NA		NA	NA		0	0	0	0	0	0	0	0	0	0	0	0	0	0	1	0	0	3			-0.267261	-0.267261	-0.267261	-0.267261	-0.267261	-0.267261	-0.267261	-0.267261	-0.267261	-0.267261	-0.267261	-0.267261	-0.267261	-0.267261
OG0016995	N	N	Y		0	0		NA	NA	NA	NA		NA	NA		0	0	0	0	0	0	0	0	0	0	0	0	0	0	0	0	0	4			#NUM!	#NUM!	#NUM!	#NUM!	#NUM!	#NUM!	#NUM!	#NUM!	#NUM!	#NUM!	#NUM!	#NUM!	#NUM!	#NUM!
OG0016996	N	N	Y		0	0		NA	NA	NA	NA		NA	NA		0	0	0	0	0	0	0	0	0	0	0	0	0	0	0	0	0	4			#NUM!	#NUM!	#NUM!	#NUM!	#NUM!	#NUM!	#NUM!	#NUM!	#NUM!	#NUM!	#NUM!	#NUM!	#NUM!	#NUM!
OG0016997	N	N	Y		0	0		NA	NA	NA	NA		NA	NA		0	0	0	0	0	0	0	0	0	0	0	0	0	0	1	0	0	3			-0.267261	-0.267261	-0.267261	-0.267261	-0.267261	-0.267261	-0.267261	-0.267261	-0.267261	-0.267261	-0.267261	-0.267261	-0.267261	-0.267261
OG0016998	N	N	Y		0	0		NA	NA	NA	NA		NA	NA		0	0	0	0	0	0	0	0	0	0	0	0	0	0	1	0	0	3			-0.267261	-0.267261	-0.267261	-0.267261	-0.267261	-0.267261	-0.267261	-0.267261	-0.267261	-0.267261	-0.267261	-0.267261	-0.267261	-0.267261
OG0016999	N	N	Y		0	0		NA	NA	NA	NA		NA	NA		0	0	0	0	0	0	0	0	0	0	0	0	0	0	0	0	0	4			#NUM!	#NUM!	#NUM!	#NUM!	#NUM!	#NUM!	#NUM!	#NUM!	#NUM!	#NUM!	#NUM!	#NUM!	#NUM!	#NUM!
OG0017000	N	N	Y		0	0		NA	NA	NA	NA		NA	NA		0	0	0	0	0	0	0	0	0	0	0	0	0	0	0	0	0	4			#NUM!	#NUM!	#NUM!	#NUM!	#NUM!	#NUM!	#NUM!	#NUM!	#NUM!	#NUM!	#NUM!	#NUM!	#NUM!	#NUM!
OG0017001	N	N	Y		0	0		NA	NA	NA	NA		NA	NA		0	0	0	0	0	0	0	0	0	0	0	0	0	0	1	0	0	3			-0.267261	-0.267261	-0.267261	-0.267261	-0.267261	-0.267261	-0.267261	-0.267261	-0.267261	-0.267261	-0.267261	-0.267261	-0.267261	-0.267261
OG0017002	N	N	Y		0	0		NA	NA	NA	NA		NA	NA		0	0	0	0	0	0	0	0	0	0	0	0	0	0	1	0	0	3			-0.267261	-0.267261	-0.267261	-0.267261	-0.267261	-0.267261	-0.267261	-0.267261	-0.267261	-0.267261	-0.267261	-0.267261	-0.267261	-0.267261
OG0017003	N	N	Y		0	0		NA	NA	NA	NA		NA	NA		0	0	0	0	0	0	0	0	0	0	0	0	0	0	0	0	0	4			#NUM!	#NUM!	#NUM!	#NUM!	#NUM!	#NUM!	#NUM!	#NUM!	#NUM!	#NUM!	#NUM!	#NUM!	#NUM!	#NUM!
OG0017004	N	N	Y		0	0		NA	NA	NA	NA		NA	NA		0	0	0	0	0	0	0	0	0	0	0	0	0	0	1	0	0	3			-0.267261	-0.267261	-0.267261	-0.267261	-0.267261	-0.267261	-0.267261	-0.267261	-0.267261	-0.267261	-0.267261	-0.267261	-0.267261	-0.267261
OG0017005	N	N	Y		0	0		NA	NA	NA	NA		NA	NA		0	0	0	0	0	0	0	0	0	0	0	0	0	0	0	0	0	4			#NUM!	#NUM!	#NUM!	#NUM!	#NUM!	#NUM!	#NUM!	#NUM!	#NUM!	#NUM!	#NUM!	#NUM!	#NUM!	#NUM!
OG0017006	N	N	Y		0	0		NA	NA	NA	NA		NA	NA		0	0	0	0	0	0	0	1	0	0	0	0	0	0	0	0	0	3			-0.267261	-0.267261	-0.267261	-0.267261	-0.267261	-0.267261	-0.267261	3.74166	-0.267261	-0.267261	-0.267261	-0.267261	-0.267261	-0.267261
OG0017007	N	N	Y		0	0		NA	NA	NA	NA		NA	NA		0	0	0	0	0	0	0	0	0	0	0	0	0	0	0	0	0	4			#NUM!	#NUM!	#NUM!	#NUM!	#NUM!	#NUM!	#NUM!	#NUM!	#NUM!	#NUM!	#NUM!	#NUM!	#NUM!	#NUM!
OG0017008	N	N	Y		0	0		NA	NA	NA	NA		NA	NA		0	0	0	0	0	0	0	0	0	0	0	0	0	0	0	0	0	4			#NUM!	#NUM!	#NUM!	#NUM!	#NUM!	#NUM!	#NUM!	#NUM!	#NUM!	#NUM!	#NUM!	#NUM!	#NUM!	#NUM!
OG0017009	N	N	Y		0	0		NA	NA	NA	NA		NA	NA		0	0	0	0	0	0	0	0	0	0	0	0	0	0	1	0	0	3			-0.267261	-0.267261	-0.267261	-0.267261	-0.267261	-0.267261	-0.267261	-0.267261	-0.267261	-0.267261	-0.267261	-0.267261	-0.267261	-0.267261
OG0017010	N	N	Y		0	0		NA	NA	NA	NA		NA	NA		0	0	0	0	0	0	0	0	0	0	0	0	0	0	0	0	0	4			#NUM!	#NUM!	#NUM!	#NUM!	#NUM!	#NUM!	#NUM!	#NUM!	#NUM!	#NUM!	#NUM!	#NUM!	#NUM!	#NUM!
OG0017011	N	N	Y		0	0		NA	NA	NA	NA		NA	NA		0	0	0	0	0	0	0	0	0	0	0	0	0	0	0	0	0	4			#NUM!	#NUM!	#NUM!	#NUM!	#NUM!	#NUM!	#NUM!	#NUM!	#NUM!	#NUM!	#NUM!	#NUM!	#NUM!	#NUM!
OG0017012	N	N	Y		0	0		NA	NA	NA	NA		NA	NA		0	0	0	0	0	0	0	0	0	0	0	0	0	0	0	0	0	4			#NUM!	#NUM!	#NUM!	#NUM!	#NUM!	#NUM!	#NUM!	#NUM!	#NUM!	#NUM!	#NUM!	#NUM!	#NUM!	#NUM!
OG0017013	N	N	Y		0	0		NA	NA	NA	NA		NA	NA		0	0	0	0	0	0	0	0	0	0	0	0	0	0	0	0	0	4			#NUM!	#NUM!	#NUM!	#NUM!	#NUM!	#NUM!	#NUM!	#NUM!	#NUM!	#NUM!	#NUM!	#NUM!	#NUM!	#NUM!
OG0017014	N	N	Y		0	0		NA	NA	NA	NA		NA	NA		0	0	0	0	0	0	0	0	0	0	0	0	0	0	1	0	0	3			-0.267261	-0.267261	-0.267261	-0.267261	-0.267261	-0.267261	-0.267261	-0.267261	-0.267261	-0.267261	-0.267261	-0.267261	-0.267261	-0.267261
OG0017015	N	N	Y		0	0		NA	NA	NA	NA		NA	NA		0	0	0	0	0	0	0	0	0	0	0	0	0	0	0	0	0	4			#NUM!	#NUM!	#NUM!	#NUM!	#NUM!	#NUM!	#NUM!	#NUM!	#NUM!	#NUM!	#NUM!	#NUM!	#NUM!	#NUM!
OG0017016	N	N	Y		0	0		NA	NA	NA	NA		NA	NA		0	0	0	0	0	0	0	0	0	0	0	0	0	0	0	0	0	4			#NUM!	#NUM!	#NUM!	#NUM!	#NUM!	#NUM!	#NUM!	#NUM!	#NUM!	#NUM!	#NUM!	#NUM!	#NUM!	#NUM!
OG0017017	N	N	Y		0	0		NA	NA	NA	NA		NA	NA		0	0	0	0	0	0	0	0	0	0	0	0	0	0	0	0	0	4			#NUM!	#NUM!	#NUM!	#NUM!	#NUM!	#NUM!	#NUM!	#NUM!	#NUM!	#NUM!	#NUM!	#NUM!	#NUM!	#NUM!
OG0017018	N	N	Y		0	0		NA	NA	NA	NA		NA	NA		0	0	0	0	0	0	0	0	0	0	0	0	0	0	3	0	0	1			-0.267261	-0.267261	-0.267261	-0.267261	-0.267261	-0.267261	-0.267261	-0.267261	-0.267261	-0.267261	-0.267261	-0.267261	-0.267261	-0.267261
OG0017019	N	N	Y		0	0		NA	NA	NA	NA		NA	NA		0	0	0	0	0	0	0	0	0	0	0	0	0	0	2	0	0	2			-0.267261	-0.267261	-0.267261	-0.267261	-0.267261	-0.267261	-0.267261	-0.267261	-0.267261	-0.267261	-0.267261	-0.267261	-0.267261	-0.267261
OG0017020	N	N	Y		0	0		NA	NA	NA	NA		NA	NA		0	0	0	0	0	0	0	0	0	0	0	0	0	0	1	0	0	3			-0.267261	-0.267261	-0.267261	-0.267261	-0.267261	-0.267261	-0.267261	-0.267261	-0.267261	-0.267261	-0.267261	-0.267261	-0.267261	-0.267261
OG0017021	N	N	Y		0	0		NA	NA	NA	NA		NA	NA		0	0	0	0	0	0	0	0	0	0	0	0	0	0	4	0	0	0			-0.267261	-0.267261	-0.267261	-0.267261	-0.267261	-0.267261	-0.267261	-0.267261	-0.267261	-0.267261	-0.267261	-0.267261	-0.267261	-0.267261
OG0017022	N	N	Y		0	0		NA	NA	NA	NA		NA	NA		0	0	0	0	0	0	0	4	0	0	0	0	0	0	0	0	0	0			-0.267261	-0.267261	-0.267261	-0.267261	-0.267261	-0.267261	-0.267261	3.74166	-0.267261	-0.267261	-0.267261	-0.267261	-0.267261	-0.267261
OG0017023	N	N	Y		0	0		NA	NA	NA	NA		NA	NA		0	0	0	0	0	0	0	4	0	0	0	0	0	0	0	0	0	0			-0.267261	-0.267261	-0.267261	-0.267261	-0.267261	-0.267261	-0.267261	3.74166	-0.267261	-0.267261	-0.267261	-0.267261	-0.267261	-0.267261
OG0017024	N	N	Y		0	0		NA	NA	NA	NA		NA	NA		0	0	0	0	0	0	0	4	0	0	0	0	0	0	0	0	0	0			-0.267261	-0.267261	-0.267261	-0.267261	-0.267261	-0.267261	-0.267261	3.74166	-0.267261	-0.267261	-0.267261	-0.267261	-0.267261	-0.267261
OG0017025	N	N	Y		0	0		NA	NA	NA	NA		NA	NA		0	0	0	0	0	0	0	4	0	0	0	0	0	0	0	0	0	0			-0.267261	-0.267261	-0.267261	-0.267261	-0.267261	-0.267261	-0.267261	3.74166	-0.267261	-0.267261	-0.267261	-0.267261	-0.267261	-0.267261
OG0017026	N	N	Y		0	0		NA	NA	NA	NA		NA	NA		0	0	0	0	0	0	0	4	0	0	0	0	0	0	0	0	0	0			-0.267261	-0.267261	-0.267261	-0.267261	-0.267261	-0.267261	-0.267261	3.74166	-0.267261	-0.267261	-0.267261	-0.267261	-0.267261	-0.267261
OG0017027	N	N	Y		0	0		NA	NA	NA	NA		NA	NA		0	0	0	0	0	0	0	4	0	0	0	0	0	0	0	0	0	0			-0.267261	-0.267261	-0.267261	-0.267261	-0.267261	-0.267261	-0.267261	3.74166	-0.267261	-0.267261	-0.267261	-0.267261	-0.267261	-0.267261
OG0017028	N	N	Y		0	0		NA	NA	NA	NA		NA	NA		0	0	0	0	0	0	0	4	0	0	0	0	0	0	0	0	0	0			-0.267261	-0.267261	-0.267261	-0.267261	-0.267261	-0.267261	-0.267261	3.74166	-0.267261	-0.267261	-0.267261	-0.267261	-0.267261	-0.267261
OG0017029	N	N	Y		0	0		NA	NA	NA	NA		NA	NA		0	0	0	0	0	0	0	4	0	0	0	0	0	0	0	0	0	0			-0.267261	-0.267261	-0.267261	-0.267261	-0.267261	-0.267261	-0.267261	3.74166	-0.267261	-0.267261	-0.267261	-0.267261	-0.267261	-0.267261
OG0017047	N	N	Y		0	0		NA	NA	NA	NA		NA	NA		0	0	0	0	0	0	0	0	0	0	0	0	3	0	0	0	0	0			-0.267261	-0.267261	-0.267261	-0.267261	-0.267261	-0.267261	-0.267261	-0.267261	-0.267261	-0.267261	-0.267261	-0.267261	3.74166	-0.267261
OG0017048	N	N	Y		0	0		NA	NA	NA	NA		NA	NA		0	0	0	0	0	0	0	0	0	0	0	0	3	0	0	0	0	0			-0.267261	-0.267261	-0.267261	-0.267261	-0.267261	-0.267261	-0.267261	-0.267261	-0.267261	-0.267261	-0.267261	-0.267261	3.74166	-0.267261
OG0017054	N	N	Y		0	0		NA	NA	NA	NA		NA	NA		0	0	0	0	0	0	0	0	0	0	0	0	3	0	0	0	0	0			-0.267261	-0.267261	-0.267261	-0.267261	-0.267261	-0.267261	-0.267261	-0.267261	-0.267261	-0.267261	-0.267261	-0.267261	3.74166	-0.267261
OG0017055	N	N	Y		0	0		NA	NA	NA	NA		NA	NA		0	0	0	0	0	0	0	0	0	0	0	0	3	0	0	0	0	0			-0.267261	-0.267261	-0.267261	-0.267261	-0.267261	-0.267261	-0.267261	-0.267261	-0.267261	-0.267261	-0.267261	-0.267261	3.74166	-0.267261
OG0017057	N	N	Y		0	0		NA	NA	NA	NA		NA	NA		0	0	0	0	0	0	0	0	0	0	0	0	3	0	0	0	0	0			-0.267261	-0.267261	-0.267261	-0.267261	-0.267261	-0.267261	-0.267261	-0.267261	-0.267261	-0.267261	-0.267261	-0.267261	3.74166	-0.267261
OG0017061	N	N	Y		0	0		NA	NA	NA	NA		NA	NA		0	0	0	0	0	0	0	0	0	0	0	0	3	0	0	0	0	0			-0.267261	-0.267261	-0.267261	-0.267261	-0.267261	-0.267261	-0.267261	-0.267261	-0.267261	-0.267261	-0.267261	-0.267261	3.74166	-0.267261
OG0017066	N	N	Y		0	0		NA	NA	NA	NA		NA	NA		0	0	0	0	0	0	0	0	0	0	0	0	3	0	0	0	0	0			-0.267261	-0.267261	-0.267261	-0.267261	-0.267261	-0.267261	-0.267261	-0.267261	-0.267261	-0.267261	-0.267261	-0.267261	3.74166	-0.267261
OG0017076	N	N	Y		0	0		NA	NA	NA	NA		NA	NA		0	0	0	0	0	0	0	0	0	0	0	0	3	0	0	0	0	0			-0.267261	-0.267261	-0.267261	-0.267261	-0.267261	-0.267261	-0.267261	-0.267261	-0.267261	-0.267261	-0.267261	-0.267261	3.74166	-0.267261
OG0017080	N	N	Y		0	0		NA	NA	NA	NA		NA	NA		0	0	0	0	0	0	0	0	0	0	0	0	3	0	0	0	0	0			-0.267261	-0.267261	-0.267261	-0.267261	-0.267261	-0.267261	-0.267261	-0.267261	-0.267261	-0.267261	-0.267261	-0.267261	3.74166	-0.267261
OG0017084	N	N	Y		0	0		NA	NA	NA	NA		NA	NA		0	0	0	0	0	0	0	0	0	0	0	0	3	0	0	0	0	0			-0.267261	-0.267261	-0.267261	-0.267261	-0.267261	-0.267261	-0.267261	-0.267261	-0.267261	-0.267261	-0.267261	-0.267261	3.74166	-0.267261
OG0017098	N	N	Y		0	0		NA	NA	NA	NA		NA	NA		0	0	0	0	0	0	0	0	0	0	0	0	3	0	0	0	0	0			-0.267261	-0.267261	-0.267261	-0.267261	-0.267261	-0.267261	-0.267261	-0.267261	-0.267261	-0.267261	-0.267261	-0.267261	3.74166	-0.267261
OG0017112	N	N	Y		0	0		NA	NA	NA	NA		NA	NA		0	0	0	0	0	0	0	0	0	0	0	0	3	0	0	0	0	0			-0.267261	-0.267261	-0.267261	-0.267261	-0.267261	-0.267261	-0.267261	-0.267261	-0.267261	-0.267261	-0.267261	-0.267261	3.74166	-0.267261
OG0017123	N	N	Y		0	0		NA	NA	NA	NA		NA	NA		0	0	0	0	0	0	0	0	0	0	0	0	3	0	0	0	0	0			-0.267261	-0.267261	-0.267261	-0.267261	-0.267261	-0.267261	-0.267261	-0.267261	-0.267261	-0.267261	-0.267261	-0.267261	3.74166	-0.267261
OG0017132	N	N	Y		0	0		NA	NA	NA	NA		NA	NA		0	0	0	0	0	0	0	0	0	0	0	0	3	0	0	0	0	0			-0.267261	-0.267261	-0.267261	-0.267261	-0.267261	-0.267261	-0.267261	-0.267261	-0.267261	-0.267261	-0.267261	-0.267261	3.74166	-0.267261
OG0017159	N	N	Y		0	0		NA	NA	NA	NA		NA	NA		0	0	0	0	0	0	0	0	0	0	0	0	3	0	0	0	0	0			-0.267261	-0.267261	-0.267261	-0.267261	-0.267261	-0.267261	-0.267261	-0.267261	-0.267261	-0.267261	-0.267261	-0.267261	3.74166	-0.267261
OG0017172	N	N	Y		0	0		NA	NA	NA	NA		NA	NA		0	0	0	0	0	0	0	0	0	0	0	0	2	0	0	0	0	1			-0.267261	-0.267261	-0.267261	-0.267261	-0.267261	-0.267261	-0.267261	-0.267261	-0.267261	-0.267261	-0.267261	-0.267261	3.74166	-0.267261
OG0017176	N	N	Y		0	0		NA	NA	NA	NA		NA	NA		0	0	0	0	0	0	0	0	0	0	0	0	3	0	0	0	0	0			-0.267261	-0.267261	-0.267261	-0.267261	-0.267261	-0.267261	-0.267261	-0.267261	-0.267261	-0.267261	-0.267261	-0.267261	3.74166	-0.267261
OG0017212	N	N	Y		0	0		NA	NA	NA	NA		NA	NA		0	0	0	0	0	0	0	0	0	0	0	0	3	0	0	0	0	0			-0.267261	-0.267261	-0.267261	-0.267261	-0.267261	-0.267261	-0.267261	-0.267261	-0.267261	-0.267261	-0.267261	-0.267261	3.74166	-0.267261
OG0017247	N	N	Y		0	0		NA	NA	NA	NA		NA	NA		0	0	0	3	0	0	0	0	0	0	0	0	0	0	0	0	0	0			-0.267261	-0.267261	-0.267261	3.74166	-0.267261	-0.267261	-0.267261	-0.267261	-0.267261	-0.267261	-0.267261	-0.267261	-0.267261	-0.267261
OG0017249	N	N	Y		0	0		NA	NA	NA	NA		NA	NA		0	0	0	3	0	0	0	0	0	0	0	0	0	0	0	0	0	0			-0.267261	-0.267261	-0.267261	3.74166	-0.267261	-0.267261	-0.267261	-0.267261	-0.267261	-0.267261	-0.267261	-0.267261	-0.267261	-0.267261
OG0017253	N	N	Y		0	0		NA	NA	NA	NA		NA	NA		0	0	0	3	0	0	0	0	0	0	0	0	0	0	0	0	0	0			-0.267261	-0.267261	-0.267261	3.74166	-0.267261	-0.267261	-0.267261	-0.267261	-0.267261	-0.267261	-0.267261	-0.267261	-0.267261	-0.267261
OG0017260	N	N	Y		0	0		NA	NA	NA	NA		NA	NA		0	0	0	3	0	0	0	0	0	0	0	0	0	0	0	0	0	0			-0.267261	-0.267261	-0.267261	3.74166	-0.267261	-0.267261	-0.267261	-0.267261	-0.267261	-0.267261	-0.267261	-0.267261	-0.267261	-0.267261
OG0017268	N	N	Y		0	0		NA	NA	NA	NA		NA	NA		0	0	0	3	0	0	0	0	0	0	0	0	0	0	0	0	0	0			-0.267261	-0.267261	-0.267261	3.74166	-0.267261	-0.267261	-0.267261	-0.267261	-0.267261	-0.267261	-0.267261	-0.267261	-0.267261	-0.267261
OG0017276	N	N	Y		0	0		NA	NA	NA	NA		NA	NA		0	0	0	3	0	0	0	0	0	0	0	0	0	0	0	0	0	0			-0.267261	-0.267261	-0.267261	3.74166	-0.267261	-0.267261	-0.267261	-0.267261	-0.267261	-0.267261	-0.267261	-0.267261	-0.267261	-0.267261
OG0017281	N	N	Y		0	0		NA	NA	NA	NA		NA	NA		0	0	0	3	0	0	0	0	0	0	0	0	0	0	0	0	0	0			-0.267261	-0.267261	-0.267261	3.74166	-0.267261	-0.267261	-0.267261	-0.267261	-0.267261	-0.267261	-0.267261	-0.267261	-0.267261	-0.267261
OG0017282	N	N	Y		0	0		NA	NA	NA	NA		NA	NA		0	0	0	3	0	0	0	0	0	0	0	0	0	0	0	0	0	0			-0.267261	-0.267261	-0.267261	3.74166	-0.267261	-0.267261	-0.267261	-0.267261	-0.267261	-0.267261	-0.267261	-0.267261	-0.267261	-0.267261
OG0017309	N	N	Y		0	0		NA	NA	NA	NA		NA	NA		0	0	0	3	0	0	0	0	0	0	0	0	0	0	0	0	0	0			-0.267261	-0.267261	-0.267261	3.74166	-0.267261	-0.267261	-0.267261	-0.267261	-0.267261	-0.267261	-0.267261	-0.267261	-0.267261	-0.267261
OG0017310	N	N	Y		0	0		NA	NA	NA	NA		NA	NA		0	0	0	3	0	0	0	0	0	0	0	0	0	0	0	0	0	0			-0.267261	-0.267261	-0.267261	3.74166	-0.267261	-0.267261	-0.267261	-0.267261	-0.267261	-0.267261	-0.267261	-0.267261	-0.267261	-0.267261
OG0017311	N	N	Y		0	0		NA	NA	NA	NA		NA	NA		0	0	0	3	0	0	0	0	0	0	0	0	0	0	0	0	0	0			-0.267261	-0.267261	-0.267261	3.74166	-0.267261	-0.267261	-0.267261	-0.267261	-0.267261	-0.267261	-0.267261	-0.267261	-0.267261	-0.267261
OG0017340	N	N	Y		0	0		NA	NA	NA	NA		NA	NA		0	0	0	1	0	0	0	0	0	0	0	0	0	0	0	2	0	0			-0.267261	-0.267261	-0.267261	3.74166	-0.267261	-0.267261	-0.267261	-0.267261	-0.267261	-0.267261	-0.267261	-0.267261	-0.267261	-0.267261
OG0017351	N	N	Y		0	0		NA	NA	NA	NA		NA	NA		0	0	0	3	0	0	0	0	0	0	0	0	0	0	0	0	0	0			-0.267261	-0.267261	-0.267261	3.74166	-0.267261	-0.267261	-0.267261	-0.267261	-0.267261	-0.267261	-0.267261	-0.267261	-0.267261	-0.267261
OG0017409	N	N	Y		0	0		NA	NA	NA	NA		NA	NA		0	0	0	3	0	0	0	0	0	0	0	0	0	0	0	0	0	0			-0.267261	-0.267261	-0.267261	3.74166	-0.267261	-0.267261	-0.267261	-0.267261	-0.267261	-0.267261	-0.267261	-0.267261	-0.267261	-0.267261
OG0017483	N	N	Y		0	0		NA	NA	NA	NA		NA	NA		0	0	0	0	0	0	0	0	0	0	0	0	0	0	0	3	0	0			#NUM!	#NUM!	#NUM!	#NUM!	#NUM!	#NUM!	#NUM!	#NUM!	#NUM!	#NUM!	#NUM!	#NUM!	#NUM!	#NUM!
OG0017484	N	N	Y		0	0		NA	NA	NA	NA		NA	NA		0	0	0	0	0	2	0	0	0	0	0	0	0	0	0	1	0	0			-0.267261	-0.267261	-0.267261	-0.267261	-0.267261	3.74166	-0.267261	-0.267261	-0.267261	-0.267261	-0.267261	-0.267261	-0.267261	-0.267261
OG0017485	N	N	Y		0	0		NA	NA	NA	NA		NA	NA		0	0	0	0	0	0	0	0	0	0	0	0	0	0	0	1	2	0			#NUM!	#NUM!	#NUM!	#NUM!	#NUM!	#NUM!	#NUM!	#NUM!	#NUM!	#NUM!	#NUM!	#NUM!	#NUM!	#NUM!
OG0017486	N	N	Y		0	0		NA	NA	NA	NA		NA	NA		0	0	0	0	0	0	0	0	0	0	0	1	0	0	0	1	0	1			-0.267261	-0.267261	-0.267261	-0.267261	-0.267261	-0.267261	-0.267261	-0.267261	-0.267261	-0.267261	-0.267261	3.74166	-0.267261	-0.267261
OG0017487	N	N	Y		0	0		NA	NA	NA	NA		NA	NA		0	0	0	0	0	0	0	0	0	0	0	0	0	0	0	3	0	0			#NUM!	#NUM!	#NUM!	#NUM!	#NUM!	#NUM!	#NUM!	#NUM!	#NUM!	#NUM!	#NUM!	#NUM!	#NUM!	#NUM!
OG0017488	N	N	Y		0	0		NA	NA	NA	NA		NA	NA		0	0	0	0	0	1	0	0	0	0	0	0	0	0	0	1	1	0			-0.267261	-0.267261	-0.267261	-0.267261	-0.267261	3.74166	-0.267261	-0.267261	-0.267261	-0.267261	-0.267261	-0.267261	-0.267261	-0.267261
OG0017490	N	N	Y		0	0		NA	NA	NA	NA		NA	NA		0	0	0	0	0	0	0	0	0	0	0	0	0	0	0	1	2	0			#NUM!	#NUM!	#NUM!	#NUM!	#NUM!	#NUM!	#NUM!	#NUM!	#NUM!	#NUM!	#NUM!	#NUM!	#NUM!	#NUM!
OG0017491	N	N	Y		0	0		NA	NA	NA	NA		NA	NA		0	0	0	0	0	0	0	0	0	1	0	0	0	0	0	1	1	0			-0.267261	-0.267261	-0.267261	-0.267261	-0.267261	-0.267261	-0.267261	-0.267261	-0.267261	3.74166	-0.267261	-0.267261	-0.267261	-0.267261
OG0017492	N	N	Y		0	0		NA	NA	NA	NA		NA	NA		0	0	0	0	0	0	0	0	0	0	0	0	0	0	0	3	0	0			#NUM!	#NUM!	#NUM!	#NUM!	#NUM!	#NUM!	#NUM!	#NUM!	#NUM!	#NUM!	#NUM!	#NUM!	#NUM!	#NUM!
OG0017493	N	N	Y		0	0		NA	NA	NA	NA		NA	NA		0	0	0	0	0	2	0	0	0	0	0	0	0	0	0	1	0	0			-0.267261	-0.267261	-0.267261	-0.267261	-0.267261	3.74166	-0.267261	-0.267261	-0.267261	-0.267261	-0.267261	-0.267261	-0.267261	-0.267261
OG0017494	N	N	Y		0	0		NA	NA	NA	NA		NA	NA		0	0	0	0	1	0	0	0	0	0	0	0	0	0	0	1	0	1			-0.267261	-0.267261	-0.267261	-0.267261	3.74166	-0.267261	-0.267261	-0.267261	-0.267261	-0.267261	-0.267261	-0.267261	-0.267261	-0.267261
OG0017495	N	N	Y		0	0		NA	NA	NA	NA		NA	NA		0	0	0	0	0	0	0	0	0	2	0	0	0	0	0	1	0	0			-0.267261	-0.267261	-0.267261	-0.267261	-0.267261	-0.267261	-0.267261	-0.267261	-0.267261	3.74166	-0.267261	-0.267261	-0.267261	-0.267261
OG0017496	N	N	Y		0	0		NA	NA	NA	NA		NA	NA		0	0	0	0	0	0	0	0	0	0	0	0	0	0	0	1	2	0			#NUM!	#NUM!	#NUM!	#NUM!	#NUM!	#NUM!	#NUM!	#NUM!	#NUM!	#NUM!	#NUM!	#NUM!	#NUM!	#NUM!
OG0017499	N	N	Y		0	0		NA	NA	NA	NA		NA	NA		0	0	1	0	0	0	0	0	0	0	0	0	0	0	0	2	0	0			-0.267261	-0.267261	3.74166	-0.267261	-0.267261	-0.267261	-0.267261	-0.267261	-0.267261	-0.267261	-0.267261	-0.267261	-0.267261	-0.267261
OG0017500	N	N	Y		0	0		NA	NA	NA	NA		NA	NA		0	0	0	0	0	1	0	0	0	0	0	0	0	0	0	2	0	0			-0.267261	-0.267261	-0.267261	-0.267261	-0.267261	3.74166	-0.267261	-0.267261	-0.267261	-0.267261	-0.267261	-0.267261	-0.267261	-0.267261
OG0017501	N	N	Y		0	0		NA	NA	NA	NA		NA	NA		0	0	0	0	0	0	0	0	0	0	0	0	0	0	0	3	0	0			#NUM!	#NUM!	#NUM!	#NUM!	#NUM!	#NUM!	#NUM!	#NUM!	#NUM!	#NUM!	#NUM!	#NUM!	#NUM!	#NUM!
OG0017502	N	N	Y		0	0		NA	NA	NA	NA		NA	NA		0	0	0	0	0	0	0	0	0	0	0	0	0	0	0	3	0	0			#NUM!	#NUM!	#NUM!	#NUM!	#NUM!	#NUM!	#NUM!	#NUM!	#NUM!	#NUM!	#NUM!	#NUM!	#NUM!	#NUM!
OG0017503	N	N	Y		0	0		NA	NA	NA	NA		NA	NA		1	0	0	0	0	0	0	0	0	0	0	0	0	0	0	2	0	0			3.74166	-0.267261	-0.267261	-0.267261	-0.267261	-0.267261	-0.267261	-0.267261	-0.267261	-0.267261	-0.267261	-0.267261	-0.267261	-0.267261
OG0017505	N	N	Y		0	0		NA	NA	NA	NA		NA	NA		0	1	0	0	0	0	0	0	0	0	0	0	0	0	0	2	0	0			-0.267261	3.74166	-0.267261	-0.267261	-0.267261	-0.267261	-0.267261	-0.267261	-0.267261	-0.267261	-0.267261	-0.267261	-0.267261	-0.267261
OG0017506	N	N	Y		0	0		NA	NA	NA	NA		NA	NA		0	0	0	0	0	0	0	0	0	0	0	0	0	0	0	3	0	0			#NUM!	#NUM!	#NUM!	#NUM!	#NUM!	#NUM!	#NUM!	#NUM!	#NUM!	#NUM!	#NUM!	#NUM!	#NUM!	#NUM!
OG0017507	N	N	Y		0	0		NA	NA	NA	NA		NA	NA		0	0	0	0	0	0	0	0	0	0	0	0	0	0	0	1	2	0			#NUM!	#NUM!	#NUM!	#NUM!	#NUM!	#NUM!	#NUM!	#NUM!	#NUM!	#NUM!	#NUM!	#NUM!	#NUM!	#NUM!
OG0017508	N	N	Y		0	0		NA	NA	NA	NA		NA	NA		0	0	0	0	0	0	0	0	0	0	0	0	0	0	0	3	0	0			#NUM!	#NUM!	#NUM!	#NUM!	#NUM!	#NUM!	#NUM!	#NUM!	#NUM!	#NUM!	#NUM!	#NUM!	#NUM!	#NUM!
OG0017509	N	N	Y		0	0		NA	NA	NA	NA		NA	NA		0	0	0	0	0	0	0	0	0	0	0	0	0	0	0	1	2	0			#NUM!	#NUM!	#NUM!	#NUM!	#NUM!	#NUM!	#NUM!	#NUM!	#NUM!	#NUM!	#NUM!	#NUM!	#NUM!	#NUM!
OG0017511	N	N	Y		0	0		NA	NA	NA	NA		NA	NA		0	0	0	0	0	0	0	0	0	0	0	0	0	0	0	3	0	0			#NUM!	#NUM!	#NUM!	#NUM!	#NUM!	#NUM!	#NUM!	#NUM!	#NUM!	#NUM!	#NUM!	#NUM!	#NUM!	#NUM!
OG0017512	N	N	Y		0	0		NA	NA	NA	NA		NA	NA		0	0	0	0	0	0	0	0	0	0	0	0	0	0	1	1	1	0			-0.267261	-0.267261	-0.267261	-0.267261	-0.267261	-0.267261	-0.267261	-0.267261	-0.267261	-0.267261	-0.267261	-0.267261	-0.267261	-0.267261
OG0017513	N	N	Y		0	0		NA	NA	NA	NA		NA	NA		0	0	0	0	0	0	0	0	0	0	0	0	0	0	0	1	2	0			#NUM!	#NUM!	#NUM!	#NUM!	#NUM!	#NUM!	#NUM!	#NUM!	#NUM!	#NUM!	#NUM!	#NUM!	#NUM!	#NUM!
OG0017514	N	N	Y		0	0		NA	NA	NA	NA		NA	NA		0	0	0	0	0	0	0	1	0	0	0	0	0	0	0	2	0	0			-0.267261	-0.267261	-0.267261	-0.267261	-0.267261	-0.267261	-0.267261	3.74166	-0.267261	-0.267261	-0.267261	-0.267261	-0.267261	-0.267261
OG0017515	N	N	Y		0	0		NA	NA	NA	NA		NA	NA		0	0	0	0	0	1	0	0	0	0	0	0	0	0	0	2	0	0			-0.267261	-0.267261	-0.267261	-0.267261	-0.267261	3.74166	-0.267261	-0.267261	-0.267261	-0.267261	-0.267261	-0.267261	-0.267261	-0.267261
OG0017517	N	N	Y		0	0		NA	NA	NA	NA		NA	NA		0	0	0	0	0	0	0	0	0	0	0	0	0	0	0	3	0	0			#NUM!	#NUM!	#NUM!	#NUM!	#NUM!	#NUM!	#NUM!	#NUM!	#NUM!	#NUM!	#NUM!	#NUM!	#NUM!	#NUM!
OG0017520	N	N	Y		0	0		NA	NA	NA	NA		NA	NA		0	0	0	0	0	0	0	0	0	0	0	0	0	0	2	1	0	0			-0.267261	-0.267261	-0.267261	-0.267261	-0.267261	-0.267261	-0.267261	-0.267261	-0.267261	-0.267261	-0.267261	-0.267261	-0.267261	-0.267261
OG0017522	N	N	Y		0	0		NA	NA	NA	NA		NA	NA		0	0	0	0	0	0	0	0	0	0	0	0	0	0	0	3	0	0			#NUM!	#NUM!	#NUM!	#NUM!	#NUM!	#NUM!	#NUM!	#NUM!	#NUM!	#NUM!	#NUM!	#NUM!	#NUM!	#NUM!
OG0017523	N	N	Y		0	0		NA	NA	NA	NA		NA	NA		0	0	0	0	0	0	0	0	1	0	0	0	0	0	0	2	0	0			-0.267261	-0.267261	-0.267261	-0.267261	-0.267261	-0.267261	-0.267261	-0.267261	3.74166	-0.267261	-0.267261	-0.267261	-0.267261	-0.267261
OG0017524	N	N	Y		0	0		NA	NA	NA	NA		NA	NA		0	0	0	0	0	2	0	0	0	0	0	0	0	0	0	1	0	0			-0.267261	-0.267261	-0.267261	-0.267261	-0.267261	3.74166	-0.267261	-0.267261	-0.267261	-0.267261	-0.267261	-0.267261	-0.267261	-0.267261
OG0017525	N	N	Y		0	0		NA	NA	NA	NA		NA	NA		0	0	0	0	0	0	0	0	0	0	0	0	0	0	0	3	0	0			#NUM!	#NUM!	#NUM!	#NUM!	#NUM!	#NUM!	#NUM!	#NUM!	#NUM!	#NUM!	#NUM!	#NUM!	#NUM!	#NUM!
OG0017527	N	N	Y		0	0		NA	NA	NA	NA		NA	NA		0	0	0	0	0	0	0	0	0	0	0	0	0	0	0	2	1	0			#NUM!	#NUM!	#NUM!	#NUM!	#NUM!	#NUM!	#NUM!	#NUM!	#NUM!	#NUM!	#NUM!	#NUM!	#NUM!	#NUM!
OG0017529	N	N	Y		0	0		NA	NA	NA	NA		NA	NA		0	0	0	0	0	0	0	0	0	0	0	0	0	0	0	3	0	0			#NUM!	#NUM!	#NUM!	#NUM!	#NUM!	#NUM!	#NUM!	#NUM!	#NUM!	#NUM!	#NUM!	#NUM!	#NUM!	#NUM!
OG0017531	N	N	Y		0	0		NA	NA	NA	NA		NA	NA		0	0	0	0	0	0	0	0	0	0	0	0	0	0	0	1	2	0			#NUM!	#NUM!	#NUM!	#NUM!	#NUM!	#NUM!	#NUM!	#NUM!	#NUM!	#NUM!	#NUM!	#NUM!	#NUM!	#NUM!
OG0017534	N	N	Y		0	0		NA	NA	NA	NA		NA	NA		0	0	0	0	0	0	0	0	0	0	0	0	0	0	0	3	0	0			#NUM!	#NUM!	#NUM!	#NUM!	#NUM!	#NUM!	#NUM!	#NUM!	#NUM!	#NUM!	#NUM!	#NUM!	#NUM!	#NUM!
OG0017536	N	N	Y		0	0		NA	NA	NA	NA		NA	NA		0	0	0	0	0	0	0	1	0	0	0	0	0	0	0	1	0	1			-0.267261	-0.267261	-0.267261	-0.267261	-0.267261	-0.267261	-0.267261	3.74166	-0.267261	-0.267261	-0.267261	-0.267261	-0.267261	-0.267261
OG0017538	N	N	Y		0	0		NA	NA	NA	NA		NA	NA		0	0	0	0	0	2	0	0	0	0	0	0	0	0	0	1	0	0			-0.267261	-0.267261	-0.267261	-0.267261	-0.267261	3.74166	-0.267261	-0.267261	-0.267261	-0.267261	-0.267261	-0.267261	-0.267261	-0.267261
OG0017539	N	N	Y		0	0		NA	NA	NA	NA		NA	NA		0	0	0	0	2	0	0	0	0	0	0	0	0	0	0	1	0	0			-0.267261	-0.267261	-0.267261	-0.267261	3.74166	-0.267261	-0.267261	-0.267261	-0.267261	-0.267261	-0.267261	-0.267261	-0.267261	-0.267261
OG0017541	N	N	Y		0	0		NA	NA	NA	NA		NA	NA		0	0	0	0	0	0	0	0	0	1	0	0	0	0	0	1	1	0			-0.267261	-0.267261	-0.267261	-0.267261	-0.267261	-0.267261	-0.267261	-0.267261	-0.267261	3.74166	-0.267261	-0.267261	-0.267261	-0.267261
OG0017542	N	N	Y		0	0		NA	NA	NA	NA		NA	NA		0	0	0	0	0	0	1	0	0	0	0	0	0	0	0	2	0	0			-0.267261	-0.267261	-0.267261	-0.267261	-0.267261	-0.267261	3.74166	-0.267261	-0.267261	-0.267261	-0.267261	-0.267261	-0.267261	-0.267261
OG0017543	N	N	Y		0	0		NA	NA	NA	NA		NA	NA		0	0	0	0	0	0	0	0	0	0	0	0	0	0	0	1	2	0			#NUM!	#NUM!	#NUM!	#NUM!	#NUM!	#NUM!	#NUM!	#NUM!	#NUM!	#NUM!	#NUM!	#NUM!	#NUM!	#NUM!
OG0017544	N	N	Y		0	0		NA	NA	NA	NA		NA	NA		0	0	0	0	0	0	0	0	0	0	0	0	0	0	0	1	2	0			#NUM!	#NUM!	#NUM!	#NUM!	#NUM!	#NUM!	#NUM!	#NUM!	#NUM!	#NUM!	#NUM!	#NUM!	#NUM!	#NUM!
OG0017545	N	N	Y		0	0		NA	NA	NA	NA		NA	NA		0	0	0	0	0	0	0	0	0	0	0	0	0	0	1	1	0	1			-0.267261	-0.267261	-0.267261	-0.267261	-0.267261	-0.267261	-0.267261	-0.267261	-0.267261	-0.267261	-0.267261	-0.267261	-0.267261	-0.267261
OG0017546	N	N	Y		0	0		NA	NA	NA	NA		NA	NA		0	0	0	0	0	0	0	0	0	0	0	0	0	0	0	1	2	0			#NUM!	#NUM!	#NUM!	#NUM!	#NUM!	#NUM!	#NUM!	#NUM!	#NUM!	#NUM!	#NUM!	#NUM!	#NUM!	#NUM!
OG0017547	N	N	Y		0	0		NA	NA	NA	NA		NA	NA		0	0	0	0	0	0	0	0	0	2	0	0	0	0	0	1	0	0			-0.267261	-0.267261	-0.267261	-0.267261	-0.267261	-0.267261	-0.267261	-0.267261	-0.267261	3.74166	-0.267261	-0.267261	-0.267261	-0.267261
OG0017548	N	N	Y		0	0		NA	NA	NA	NA		NA	NA		0	0	0	0	0	0	0	0	0	0	0	0	0	0	0	1	2	0			#NUM!	#NUM!	#NUM!	#NUM!	#NUM!	#NUM!	#NUM!	#NUM!	#NUM!	#NUM!	#NUM!	#NUM!	#NUM!	#NUM!
OG0017549	N	N	Y		0	0		NA	NA	NA	NA		NA	NA		0	0	0	0	0	0	0	0	0	0	0	0	0	0	0	3	0	0			#NUM!	#NUM!	#NUM!	#NUM!	#NUM!	#NUM!	#NUM!	#NUM!	#NUM!	#NUM!	#NUM!	#NUM!	#NUM!	#NUM!
OG0017551	N	N	Y		0	0		NA	NA	NA	NA		NA	NA		0	0	0	0	0	0	0	0	0	2	0	0	0	0	0	1	0	0			-0.267261	-0.267261	-0.267261	-0.267261	-0.267261	-0.267261	-0.267261	-0.267261	-0.267261	3.74166	-0.267261	-0.267261	-0.267261	-0.267261
OG0017552	N	N	Y		0	0		NA	NA	NA	NA		NA	NA		0	0	0	0	0	0	0	0	0	0	0	0	0	0	0	3	0	0			#NUM!	#NUM!	#NUM!	#NUM!	#NUM!	#NUM!	#NUM!	#NUM!	#NUM!	#NUM!	#NUM!	#NUM!	#NUM!	#NUM!
OG0017556	N	N	Y		0	0		NA	NA	NA	NA		NA	NA		0	0	0	0	0	0	0	2	0	0	0	0	0	0	0	1	0	0			-0.267261	-0.267261	-0.267261	-0.267261	-0.267261	-0.267261	-0.267261	3.74166	-0.267261	-0.267261	-0.267261	-0.267261	-0.267261	-0.267261
OG0017557	N	N	Y		0	0		NA	NA	NA	NA		NA	NA		0	0	0	0	1	0	0	0	0	0	0	0	0	0	0	2	0	0			-0.267261	-0.267261	-0.267261	-0.267261	3.74166	-0.267261	-0.267261	-0.267261	-0.267261	-0.267261	-0.267261	-0.267261	-0.267261	-0.267261
OG0017560	N	N	Y		0	0		NA	NA	NA	NA		NA	NA		0	0	0	0	0	0	0	0	0	0	0	0	0	0	0	3	0	0			#NUM!	#NUM!	#NUM!	#NUM!	#NUM!	#NUM!	#NUM!	#NUM!	#NUM!	#NUM!	#NUM!	#NUM!	#NUM!	#NUM!
OG0017562	N	N	Y		0	0		NA	NA	NA	NA		NA	NA		0	0	0	0	0	0	0	0	0	0	0	0	0	0	0	1	2	0			#NUM!	#NUM!	#NUM!	#NUM!	#NUM!	#NUM!	#NUM!	#NUM!	#NUM!	#NUM!	#NUM!	#NUM!	#NUM!	#NUM!
OG0017563	N	N	Y		0	0		NA	NA	NA	NA		NA	NA		0	0	0	0	0	0	0	0	0	0	0	0	0	0	0	2	1	0			#NUM!	#NUM!	#NUM!	#NUM!	#NUM!	#NUM!	#NUM!	#NUM!	#NUM!	#NUM!	#NUM!	#NUM!	#NUM!	#NUM!
OG0017564	N	N	Y		0	0		NA	NA	NA	NA		NA	NA		0	0	0	0	2	0	0	0	0	0	0	0	0	0	0	1	0	0			-0.267261	-0.267261	-0.267261	-0.267261	3.74166	-0.267261	-0.267261	-0.267261	-0.267261	-0.267261	-0.267261	-0.267261	-0.267261	-0.267261
OG0017565	N	N	Y		0	0		NA	NA	NA	NA		NA	NA		0	0	0	0	0	2	0	0	0	0	0	0	0	0	0	1	0	0			-0.267261	-0.267261	-0.267261	-0.267261	-0.267261	3.74166	-0.267261	-0.267261	-0.267261	-0.267261	-0.267261	-0.267261	-0.267261	-0.267261
OG0017566	N	N	Y		0	0		NA	NA	NA	NA		NA	NA		0	0	0	0	0	0	0	0	0	0	0	0	0	0	0	1	2	0			#NUM!	#NUM!	#NUM!	#NUM!	#NUM!	#NUM!	#NUM!	#NUM!	#NUM!	#NUM!	#NUM!	#NUM!	#NUM!	#NUM!
OG0017567	N	N	Y		0	0		NA	NA	NA	NA		NA	NA		0	0	0	0	0	0	0	0	0	1	0	0	0	0	0	1	1	0			-0.267261	-0.267261	-0.267261	-0.267261	-0.267261	-0.267261	-0.267261	-0.267261	-0.267261	3.74166	-0.267261	-0.267261	-0.267261	-0.267261
OG0017569	N	N	Y		0	0		NA	NA	NA	NA		NA	NA		0	0	0	0	0	0	0	0	0	1	0	0	0	0	0	1	1	0			-0.267261	-0.267261	-0.267261	-0.267261	-0.267261	-0.267261	-0.267261	-0.267261	-0.267261	3.74166	-0.267261	-0.267261	-0.267261	-0.267261
OG0017571	N	N	Y		0	0		NA	NA	NA	NA		NA	NA		0	0	0	0	0	0	0	0	0	0	0	0	0	0	0	2	1	0			#NUM!	#NUM!	#NUM!	#NUM!	#NUM!	#NUM!	#NUM!	#NUM!	#NUM!	#NUM!	#NUM!	#NUM!	#NUM!	#NUM!
OG0017574	N	N	Y		0	0		NA	NA	NA	NA		NA	NA		0	0	0	0	0	0	0	0	0	0	0	0	0	0	0	1	2	0			#NUM!	#NUM!	#NUM!	#NUM!	#NUM!	#NUM!	#NUM!	#NUM!	#NUM!	#NUM!	#NUM!	#NUM!	#NUM!	#NUM!
OG0017575	N	N	Y		0	0		NA	NA	NA	NA		NA	NA		0	0	0	0	0	0	0	0	0	0	0	0	0	0	0	1	0	2			#NUM!	#NUM!	#NUM!	#NUM!	#NUM!	#NUM!	#NUM!	#NUM!	#NUM!	#NUM!	#NUM!	#NUM!	#NUM!	#NUM!
OG0017578	N	N	Y		0	0		NA	NA	NA	NA		NA	NA		0	0	0	0	0	0	0	0	0	0	0	0	0	0	0	3	0	0			#NUM!	#NUM!	#NUM!	#NUM!	#NUM!	#NUM!	#NUM!	#NUM!	#NUM!	#NUM!	#NUM!	#NUM!	#NUM!	#NUM!
OG0017583	N	N	Y		0	0		NA	NA	NA	NA		NA	NA		0	0	0	0	0	0	0	0	0	0	0	0	0	0	0	1	2	0			#NUM!	#NUM!	#NUM!	#NUM!	#NUM!	#NUM!	#NUM!	#NUM!	#NUM!	#NUM!	#NUM!	#NUM!	#NUM!	#NUM!
OG0017584	N	N	Y		0	0		NA	NA	NA	NA		NA	NA		0	0	0	0	0	0	0	0	2	0	0	0	0	0	0	1	0	0			-0.267261	-0.267261	-0.267261	-0.267261	-0.267261	-0.267261	-0.267261	-0.267261	3.74166	-0.267261	-0.267261	-0.267261	-0.267261	-0.267261
OG0017586	N	N	Y		0	0		NA	NA	NA	NA		NA	NA		0	0	0	0	0	0	0	0	0	0	0	0	0	0	0	1	2	0			#NUM!	#NUM!	#NUM!	#NUM!	#NUM!	#NUM!	#NUM!	#NUM!	#NUM!	#NUM!	#NUM!	#NUM!	#NUM!	#NUM!
OG0017587	N	N	Y		0	0		NA	NA	NA	NA		NA	NA		0	0	0	0	0	0	0	0	0	0	0	0	0	0	0	1	0	2			#NUM!	#NUM!	#NUM!	#NUM!	#NUM!	#NUM!	#NUM!	#NUM!	#NUM!	#NUM!	#NUM!	#NUM!	#NUM!	#NUM!
OG0017590	N	N	Y		0	0		NA	NA	NA	NA		NA	NA		0	0	0	0	0	0	0	0	0	0	0	0	0	0	0	3	0	0			#NUM!	#NUM!	#NUM!	#NUM!	#NUM!	#NUM!	#NUM!	#NUM!	#NUM!	#NUM!	#NUM!	#NUM!	#NUM!	#NUM!
OG0017591	N	N	Y		0	0		NA	NA	NA	NA		NA	NA		0	0	0	0	0	0	2	0	0	0	0	0	0	0	0	1	0	0			-0.267261	-0.267261	-0.267261	-0.267261	-0.267261	-0.267261	3.74166	-0.267261	-0.267261	-0.267261	-0.267261	-0.267261	-0.267261	-0.267261
OG0017592	N	N	Y		0	0		NA	NA	NA	NA		NA	NA		0	0	0	0	0	0	0	1	0	0	0	0	0	0	0	1	1	0			-0.267261	-0.267261	-0.267261	-0.267261	-0.267261	-0.267261	-0.267261	3.74166	-0.267261	-0.267261	-0.267261	-0.267261	-0.267261	-0.267261
OG0017594	N	N	Y		0	0		NA	NA	NA	NA		NA	NA		0	0	0	0	0	0	0	0	0	0	0	0	0	0	0	1	2	0			#NUM!	#NUM!	#NUM!	#NUM!	#NUM!	#NUM!	#NUM!	#NUM!	#NUM!	#NUM!	#NUM!	#NUM!	#NUM!	#NUM!
OG0017597	N	N	Y		0	0		NA	NA	NA	NA		NA	NA		0	0	0	0	0	0	0	0	0	0	0	0	0	0	0	1	2	0			#NUM!	#NUM!	#NUM!	#NUM!	#NUM!	#NUM!	#NUM!	#NUM!	#NUM!	#NUM!	#NUM!	#NUM!	#NUM!	#NUM!
OG0017598	N	N	Y		0	0		NA	NA	NA	NA		NA	NA		0	0	0	0	0	1	0	0	0	0	0	0	0	0	0	2	0	0			-0.267261	-0.267261	-0.267261	-0.267261	-0.267261	3.74166	-0.267261	-0.267261	-0.267261	-0.267261	-0.267261	-0.267261	-0.267261	-0.267261
OG0017599	N	N	Y		0	0		NA	NA	NA	NA		NA	NA		0	0	0	0	0	0	0	0	1	0	0	0	0	0	0	1	0	1			-0.267261	-0.267261	-0.267261	-0.267261	-0.267261	-0.267261	-0.267261	-0.267261	3.74166	-0.267261	-0.267261	-0.267261	-0.267261	-0.267261
OG0017600	N	N	Y		0	0		NA	NA	NA	NA		NA	NA		0	0	0	0	0	0	0	0	0	2	0	0	0	0	0	1	0	0			-0.267261	-0.267261	-0.267261	-0.267261	-0.267261	-0.267261	-0.267261	-0.267261	-0.267261	3.74166	-0.267261	-0.267261	-0.267261	-0.267261
OG0017601	N	N	Y		0	0		NA	NA	NA	NA		NA	NA		0	0	0	0	0	0	0	0	2	0	0	0	0	0	0	1	0	0			-0.267261	-0.267261	-0.267261	-0.267261	-0.267261	-0.267261	-0.267261	-0.267261	3.74166	-0.267261	-0.267261	-0.267261	-0.267261	-0.267261
OG0017602	N	N	Y		0	0		NA	NA	NA	NA		NA	NA		0	0	0	0	0	0	0	1	0	0	0	0	0	0	0	1	1	0			-0.267261	-0.267261	-0.267261	-0.267261	-0.267261	-0.267261	-0.267261	3.74166	-0.267261	-0.267261	-0.267261	-0.267261	-0.267261	-0.267261
OG0017604	N	N	Y		0	0		NA	NA	NA	NA		NA	NA		0	0	0	0	0	0	0	0	0	1	0	0	0	0	0	1	0	1			-0.267261	-0.267261	-0.267261	-0.267261	-0.267261	-0.267261	-0.267261	-0.267261	-0.267261	3.74166	-0.267261	-0.267261	-0.267261	-0.267261
OG0017606	N	N	Y		0	0		NA	NA	NA	NA		NA	NA		0	0	0	0	0	0	0	0	0	0	0	0	0	0	0	1	2	0			#NUM!	#NUM!	#NUM!	#NUM!	#NUM!	#NUM!	#NUM!	#NUM!	#NUM!	#NUM!	#NUM!	#NUM!	#NUM!	#NUM!
OG0017607	N	N	Y		0	0		NA	NA	NA	NA		NA	NA		0	0	0	0	0	0	0	0	2	0	0	0	0	0	0	1	0	0			-0.267261	-0.267261	-0.267261	-0.267261	-0.267261	-0.267261	-0.267261	-0.267261	3.74166	-0.267261	-0.267261	-0.267261	-0.267261	-0.267261
OG0017609	N	N	Y		0	0		NA	NA	NA	NA		NA	NA		2	0	0	0	0	0	0	0	0	0	0	0	0	0	0	1	0	0			3.74166	-0.267261	-0.267261	-0.267261	-0.267261	-0.267261	-0.267261	-0.267261	-0.267261	-0.267261	-0.267261	-0.267261	-0.267261	-0.267261
OG0017610	N	N	Y		0	0		NA	NA	NA	NA		NA	NA		0	0	0	0	0	0	0	0	0	1	0	0	0	0	0	1	1	0			-0.267261	-0.267261	-0.267261	-0.267261	-0.267261	-0.267261	-0.267261	-0.267261	-0.267261	3.74166	-0.267261	-0.267261	-0.267261	-0.267261
OG0017611	N	N	Y		0	0		NA	NA	NA	NA		NA	NA		0	0	0	0	0	0	0	0	0	0	0	0	0	0	0	1	0	2			#NUM!	#NUM!	#NUM!	#NUM!	#NUM!	#NUM!	#NUM!	#NUM!	#NUM!	#NUM!	#NUM!	#NUM!	#NUM!	#NUM!
OG0017612	N	N	Y		0	0		NA	NA	NA	NA		NA	NA		0	0	0	0	0	0	0	0	0	0	0	0	0	0	0	1	2	0			#NUM!	#NUM!	#NUM!	#NUM!	#NUM!	#NUM!	#NUM!	#NUM!	#NUM!	#NUM!	#NUM!	#NUM!	#NUM!	#NUM!
OG0017613	N	N	Y		0	0		NA	NA	NA	NA		NA	NA		0	0	0	0	0	0	0	0	0	0	0	0	0	0	0	1	2	0			#NUM!	#NUM!	#NUM!	#NUM!	#NUM!	#NUM!	#NUM!	#NUM!	#NUM!	#NUM!	#NUM!	#NUM!	#NUM!	#NUM!
OG0017651	N	N	Y		0	0		NA	NA	NA	NA		NA	NA		0	0	3	0	0	0	0	0	0	0	0	0	0	0	0	0	0	0			-0.267261	-0.267261	3.74166	-0.267261	-0.267261	-0.267261	-0.267261	-0.267261	-0.267261	-0.267261	-0.267261	-0.267261	-0.267261	-0.267261
OG0017654	N	N	Y		0	0		NA	NA	NA	NA		NA	NA		0	0	3	0	0	0	0	0	0	0	0	0	0	0	0	0	0	0			-0.267261	-0.267261	3.74166	-0.267261	-0.267261	-0.267261	-0.267261	-0.267261	-0.267261	-0.267261	-0.267261	-0.267261	-0.267261	-0.267261
OG0017656	N	N	Y		0	0		NA	NA	NA	NA		NA	NA		0	0	3	0	0	0	0	0	0	0	0	0	0	0	0	0	0	0			-0.267261	-0.267261	3.74166	-0.267261	-0.267261	-0.267261	-0.267261	-0.267261	-0.267261	-0.267261	-0.267261	-0.267261	-0.267261	-0.267261
OG0017664	N	N	Y		0	0		NA	NA	NA	NA		NA	NA		0	0	2	0	0	0	0	0	0	0	0	0	0	0	0	0	1	0			-0.267261	-0.267261	3.74166	-0.267261	-0.267261	-0.267261	-0.267261	-0.267261	-0.267261	-0.267261	-0.267261	-0.267261	-0.267261	-0.267261
OG0017678	N	N	Y		0	0		NA	NA	NA	NA		NA	NA		0	0	3	0	0	0	0	0	0	0	0	0	0	0	0	0	0	0			-0.267261	-0.267261	3.74166	-0.267261	-0.267261	-0.267261	-0.267261	-0.267261	-0.267261	-0.267261	-0.267261	-0.267261	-0.267261	-0.267261
OG0017712	N	N	Y		0	0		NA	NA	NA	NA		NA	NA		0	0	3	0	0	0	0	0	0	0	0	0	0	0	0	0	0	0			-0.267261	-0.267261	3.74166	-0.267261	-0.267261	-0.267261	-0.267261	-0.267261	-0.267261	-0.267261	-0.267261	-0.267261	-0.267261	-0.267261
OG0017719	N	N	Y		0	0		NA	NA	NA	NA		NA	NA		0	0	3	0	0	0	0	0	0	0	0	0	0	0	0	0	0	0			-0.267261	-0.267261	3.74166	-0.267261	-0.267261	-0.267261	-0.267261	-0.267261	-0.267261	-0.267261	-0.267261	-0.267261	-0.267261	-0.267261
OG0017745	N	N	Y		0	0		NA	NA	NA	NA		NA	NA		0	0	3	0	0	0	0	0	0	0	0	0	0	0	0	0	0	0			-0.267261	-0.267261	3.74166	-0.267261	-0.267261	-0.267261	-0.267261	-0.267261	-0.267261	-0.267261	-0.267261	-0.267261	-0.267261	-0.267261
OG0017747	N	N	Y		0	0		NA	NA	NA	NA		NA	NA		0	0	3	0	0	0	0	0	0	0	0	0	0	0	0	0	0	0			-0.267261	-0.267261	3.74166	-0.267261	-0.267261	-0.267261	-0.267261	-0.267261	-0.267261	-0.267261	-0.267261	-0.267261	-0.267261	-0.267261
OG0017758	N	N	Y		0	0		NA	NA	NA	NA		NA	NA		0	0	3	0	0	0	0	0	0	0	0	0	0	0	0	0	0	0			-0.267261	-0.267261	3.74166	-0.267261	-0.267261	-0.267261	-0.267261	-0.267261	-0.267261	-0.267261	-0.267261	-0.267261	-0.267261	-0.267261
OG0017761	N	N	Y		0	0		NA	NA	NA	NA		NA	NA		0	0	3	0	0	0	0	0	0	0	0	0	0	0	0	0	0	0			-0.267261	-0.267261	3.74166	-0.267261	-0.267261	-0.267261	-0.267261	-0.267261	-0.267261	-0.267261	-0.267261	-0.267261	-0.267261	-0.267261
OG0017765	N	N	Y		0	0		NA	NA	NA	NA		NA	NA		0	0	3	0	0	0	0	0	0	0	0	0	0	0	0	0	0	0			-0.267261	-0.267261	3.74166	-0.267261	-0.267261	-0.267261	-0.267261	-0.267261	-0.267261	-0.267261	-0.267261	-0.267261	-0.267261	-0.267261
OG0017871	N	N	Y		0	0		NA	NA	NA	NA		NA	NA		0	0	0	0	0	0	0	0	0	0	0	3	0	0	0	0	0	0			-0.267261	-0.267261	-0.267261	-0.267261	-0.267261	-0.267261	-0.267261	-0.267261	-0.267261	-0.267261	-0.267261	3.74166	-0.267261	-0.267261
OG0017872	N	N	Y		0	0		NA	NA	NA	NA		NA	NA		0	0	0	0	0	0	0	0	0	0	0	3	0	0	0	0	0	0			-0.267261	-0.267261	-0.267261	-0.267261	-0.267261	-0.267261	-0.267261	-0.267261	-0.267261	-0.267261	-0.267261	3.74166	-0.267261	-0.267261
OG0017873	N	N	Y		0	0		NA	NA	NA	NA		NA	NA		0	0	0	0	0	0	0	0	0	0	0	2	0	0	0	0	1	0			-0.267261	-0.267261	-0.267261	-0.267261	-0.267261	-0.267261	-0.267261	-0.267261	-0.267261	-0.267261	-0.267261	3.74166	-0.267261	-0.267261
OG0017875	N	N	Y		0	0		NA	NA	NA	NA		NA	NA		0	0	0	0	0	0	0	0	0	0	0	3	0	0	0	0	0	0			-0.267261	-0.267261	-0.267261	-0.267261	-0.267261	-0.267261	-0.267261	-0.267261	-0.267261	-0.267261	-0.267261	3.74166	-0.267261	-0.267261
OG0017878	N	N	Y		0	0		NA	NA	NA	NA		NA	NA		0	0	0	0	0	0	0	0	0	0	0	2	0	0	0	0	0	1			-0.267261	-0.267261	-0.267261	-0.267261	-0.267261	-0.267261	-0.267261	-0.267261	-0.267261	-0.267261	-0.267261	3.74166	-0.267261	-0.267261
OG0017880	N	N	Y		0	0		NA	NA	NA	NA		NA	NA		0	0	0	0	0	0	0	0	0	0	0	3	0	0	0	0	0	0			-0.267261	-0.267261	-0.267261	-0.267261	-0.267261	-0.267261	-0.267261	-0.267261	-0.267261	-0.267261	-0.267261	3.74166	-0.267261	-0.267261
OG0017883	N	N	Y		0	0		NA	NA	NA	NA		NA	NA		0	0	0	0	0	0	0	0	0	0	0	3	0	0	0	0	0	0			-0.267261	-0.267261	-0.267261	-0.267261	-0.267261	-0.267261	-0.267261	-0.267261	-0.267261	-0.267261	-0.267261	3.74166	-0.267261	-0.267261
OG0017895	N	N	Y		0	0		NA	NA	NA	NA		NA	NA		0	0	0	0	0	0	0	0	0	0	0	3	0	0	0	0	0	0			-0.267261	-0.267261	-0.267261	-0.267261	-0.267261	-0.267261	-0.267261	-0.267261	-0.267261	-0.267261	-0.267261	3.74166	-0.267261	-0.267261
OG0017897	N	N	Y		0	0		NA	NA	NA	NA		NA	NA		0	0	0	0	0	0	0	0	0	0	0	3	0	0	0	0	0	0			-0.267261	-0.267261	-0.267261	-0.267261	-0.267261	-0.267261	-0.267261	-0.267261	-0.267261	-0.267261	-0.267261	3.74166	-0.267261	-0.267261
OG0017900	N	N	Y		0	0		NA	NA	NA	NA		NA	NA		0	0	0	0	0	0	0	0	0	0	0	3	0	0	0	0	0	0			-0.267261	-0.267261	-0.267261	-0.267261	-0.267261	-0.267261	-0.267261	-0.267261	-0.267261	-0.267261	-0.267261	3.74166	-0.267261	-0.267261
OG0017904	N	N	Y		0	0		NA	NA	NA	NA		NA	NA		0	0	0	0	0	0	0	0	0	0	0	1	0	0	0	0	0	2			-0.267261	-0.267261	-0.267261	-0.267261	-0.267261	-0.267261	-0.267261	-0.267261	-0.267261	-0.267261	-0.267261	3.74166	-0.267261	-0.267261
OG0017922	N	N	Y		0	0		NA	NA	NA	NA		NA	NA		0	0	0	0	0	0	0	0	0	0	0	1	0	0	0	0	2	0			-0.267261	-0.267261	-0.267261	-0.267261	-0.267261	-0.267261	-0.267261	-0.267261	-0.267261	-0.267261	-0.267261	3.74166	-0.267261	-0.267261
OG0017953	N	N	Y		0	0		NA	NA	NA	NA		NA	NA		0	0	0	0	0	0	0	0	0	3	0	0	0	0	0	0	0	0			-0.267261	-0.267261	-0.267261	-0.267261	-0.267261	-0.267261	-0.267261	-0.267261	-0.267261	3.74166	-0.267261	-0.267261	-0.267261	-0.267261
OG0017954	N	N	Y		0	0		NA	NA	NA	NA		NA	NA		0	0	0	0	0	0	0	0	0	3	0	0	0	0	0	0	0	0			-0.267261	-0.267261	-0.267261	-0.267261	-0.267261	-0.267261	-0.267261	-0.267261	-0.267261	3.74166	-0.267261	-0.267261	-0.267261	-0.267261
OG0017955	N	N	Y		0	0		NA	NA	NA	NA		NA	NA		0	0	0	0	0	0	0	0	0	3	0	0	0	0	0	0	0	0			-0.267261	-0.267261	-0.267261	-0.267261	-0.267261	-0.267261	-0.267261	-0.267261	-0.267261	3.74166	-0.267261	-0.267261	-0.267261	-0.267261
OG0017960	N	N	Y		0	0		NA	NA	NA	NA		NA	NA		0	0	0	0	0	0	0	0	0	1	0	0	0	0	0	0	2	0			-0.267261	-0.267261	-0.267261	-0.267261	-0.267261	-0.267261	-0.267261	-0.267261	-0.267261	3.74166	-0.267261	-0.267261	-0.267261	-0.267261
OG0017962	N	N	Y		0	0		NA	NA	NA	NA		NA	NA		0	0	0	0	0	0	0	0	0	1	0	0	0	0	0	0	2	0			-0.267261	-0.267261	-0.267261	-0.267261	-0.267261	-0.267261	-0.267261	-0.267261	-0.267261	3.74166	-0.267261	-0.267261	-0.267261	-0.267261
OG0017963	N	N	Y		0	0		NA	NA	NA	NA		NA	NA		0	0	0	0	0	0	0	0	0	3	0	0	0	0	0	0	0	0			-0.267261	-0.267261	-0.267261	-0.267261	-0.267261	-0.267261	-0.267261	-0.267261	-0.267261	3.74166	-0.267261	-0.267261	-0.267261	-0.267261
OG0017964	N	N	Y		0	0		NA	NA	NA	NA		NA	NA		0	0	0	0	0	0	0	0	0	3	0	0	0	0	0	0	0	0			-0.267261	-0.267261	-0.267261	-0.267261	-0.267261	-0.267261	-0.267261	-0.267261	-0.267261	3.74166	-0.267261	-0.267261	-0.267261	-0.267261
OG0017967	N	N	Y		0	0		NA	NA	NA	NA		NA	NA		0	0	0	0	0	0	0	0	0	3	0	0	0	0	0	0	0	0			-0.267261	-0.267261	-0.267261	-0.267261	-0.267261	-0.267261	-0.267261	-0.267261	-0.267261	3.74166	-0.267261	-0.267261	-0.267261	-0.267261
OG0017968	N	N	Y		0	0		NA	NA	NA	NA		NA	NA		0	0	0	0	0	0	0	0	0	1	0	0	0	0	0	0	2	0			-0.267261	-0.267261	-0.267261	-0.267261	-0.267261	-0.267261	-0.267261	-0.267261	-0.267261	3.74166	-0.267261	-0.267261	-0.267261	-0.267261
OG0017970	N	N	Y		0	0		NA	NA	NA	NA		NA	NA		0	0	0	0	0	0	0	0	0	2	0	0	0	0	0	0	1	0			-0.267261	-0.267261	-0.267261	-0.267261	-0.267261	-0.267261	-0.267261	-0.267261	-0.267261	3.74166	-0.267261	-0.267261	-0.267261	-0.267261
OG0017974	N	N	Y		0	0		NA	NA	NA	NA		NA	NA		0	0	0	0	0	0	0	0	0	3	0	0	0	0	0	0	0	0			-0.267261	-0.267261	-0.267261	-0.267261	-0.267261	-0.267261	-0.267261	-0.267261	-0.267261	3.74166	-0.267261	-0.267261	-0.267261	-0.267261
OG0017980	N	N	Y		0	0		NA	NA	NA	NA		NA	NA		0	0	0	0	0	0	0	0	0	3	0	0	0	0	0	0	0	0			-0.267261	-0.267261	-0.267261	-0.267261	-0.267261	-0.267261	-0.267261	-0.267261	-0.267261	3.74166	-0.267261	-0.267261	-0.267261	-0.267261
OG0017982	N	N	Y		0	0		NA	NA	NA	NA		NA	NA		0	0	0	0	0	0	0	0	0	2	0	0	0	0	0	0	1	0			-0.267261	-0.267261	-0.267261	-0.267261	-0.267261	-0.267261	-0.267261	-0.267261	-0.267261	3.74166	-0.267261	-0.267261	-0.267261	-0.267261
OG0017984	N	N	Y		0	0		NA	NA	NA	NA		NA	NA		0	0	0	0	0	0	0	0	0	3	0	0	0	0	0	0	0	0			-0.267261	-0.267261	-0.267261	-0.267261	-0.267261	-0.267261	-0.267261	-0.267261	-0.267261	3.74166	-0.267261	-0.267261	-0.267261	-0.267261
OG0017990	N	N	Y		0	0		NA	NA	NA	NA		NA	NA		0	0	0	0	0	0	0	0	0	1	0	0	0	0	0	0	2	0			-0.267261	-0.267261	-0.267261	-0.267261	-0.267261	-0.267261	-0.267261	-0.267261	-0.267261	3.74166	-0.267261	-0.267261	-0.267261	-0.267261
OG0017991	N	N	Y		0	0		NA	NA	NA	NA		NA	NA		0	0	0	0	0	0	0	0	0	3	0	0	0	0	0	0	0	0			-0.267261	-0.267261	-0.267261	-0.267261	-0.267261	-0.267261	-0.267261	-0.267261	-0.267261	3.74166	-0.267261	-0.267261	-0.267261	-0.267261
OG0017992	N	N	Y		0	0		NA	NA	NA	NA		NA	NA		0	0	0	0	0	0	0	0	0	3	0	0	0	0	0	0	0	0			-0.267261	-0.267261	-0.267261	-0.267261	-0.267261	-0.267261	-0.267261	-0.267261	-0.267261	3.74166	-0.267261	-0.267261	-0.267261	-0.267261
OG0017993	N	N	Y		0	0		NA	NA	NA	NA		NA	NA		0	0	0	0	0	0	0	0	0	2	0	0	0	0	0	0	1	0			-0.267261	-0.267261	-0.267261	-0.267261	-0.267261	-0.267261	-0.267261	-0.267261	-0.267261	3.74166	-0.267261	-0.267261	-0.267261	-0.267261
OG0017995	N	N	Y		0	0		NA	NA	NA	NA		NA	NA		0	0	0	0	0	0	0	0	0	1	0	0	0	0	0	0	2	0			-0.267261	-0.267261	-0.267261	-0.267261	-0.267261	-0.267261	-0.267261	-0.267261	-0.267261	3.74166	-0.267261	-0.267261	-0.267261	-0.267261
OG0017996	N	N	Y		0	0		NA	NA	NA	NA		NA	NA		0	0	0	0	0	0	0	0	0	1	0	0	0	0	0	0	2	0			-0.267261	-0.267261	-0.267261	-0.267261	-0.267261	-0.267261	-0.267261	-0.267261	-0.267261	3.74166	-0.267261	-0.267261	-0.267261	-0.267261
OG0017998	N	N	Y		0	0		NA	NA	NA	NA		NA	NA		0	0	0	0	0	0	0	0	0	1	0	0	0	0	0	0	2	0			-0.267261	-0.267261	-0.267261	-0.267261	-0.267261	-0.267261	-0.267261	-0.267261	-0.267261	3.74166	-0.267261	-0.267261	-0.267261	-0.267261
OG0018003	N	N	Y		0	0		NA	NA	NA	NA		NA	NA		0	0	0	0	0	0	0	0	0	1	0	0	0	0	0	0	2	0			-0.267261	-0.267261	-0.267261	-0.267261	-0.267261	-0.267261	-0.267261	-0.267261	-0.267261	3.74166	-0.267261	-0.267261	-0.267261	-0.267261
OG0018005	N	N	Y		0	0		NA	NA	NA	NA		NA	NA		0	0	0	0	0	0	0	0	0	3	0	0	0	0	0	0	0	0			-0.267261	-0.267261	-0.267261	-0.267261	-0.267261	-0.267261	-0.267261	-0.267261	-0.267261	3.74166	-0.267261	-0.267261	-0.267261	-0.267261
OG0018006	N	N	Y		0	0		NA	NA	NA	NA		NA	NA		0	0	0	0	0	0	0	0	0	1	0	0	0	0	0	0	0	2			-0.267261	-0.267261	-0.267261	-0.267261	-0.267261	-0.267261	-0.267261	-0.267261	-0.267261	3.74166	-0.267261	-0.267261	-0.267261	-0.267261
OG0018008	N	N	Y		0	0		NA	NA	NA	NA		NA	NA		0	0	0	0	0	0	0	0	0	2	0	0	0	0	0	0	1	0			-0.267261	-0.267261	-0.267261	-0.267261	-0.267261	-0.267261	-0.267261	-0.267261	-0.267261	3.74166	-0.267261	-0.267261	-0.267261	-0.267261
OG0018009	N	N	Y		0	0		NA	NA	NA	NA		NA	NA		0	0	0	0	0	0	0	0	0	3	0	0	0	0	0	0	0	0			-0.267261	-0.267261	-0.267261	-0.267261	-0.267261	-0.267261	-0.267261	-0.267261	-0.267261	3.74166	-0.267261	-0.267261	-0.267261	-0.267261
OG0018016	N	N	Y		0	0		NA	NA	NA	NA		NA	NA		0	0	0	0	0	0	0	0	0	1	0	0	0	0	0	0	2	0			-0.267261	-0.267261	-0.267261	-0.267261	-0.267261	-0.267261	-0.267261	-0.267261	-0.267261	3.74166	-0.267261	-0.267261	-0.267261	-0.267261
OG0018017	N	N	Y		0	0		NA	NA	NA	NA		NA	NA		0	0	0	0	0	0	0	0	0	1	0	0	0	0	0	0	2	0			-0.267261	-0.267261	-0.267261	-0.267261	-0.267261	-0.267261	-0.267261	-0.267261	-0.267261	3.74166	-0.267261	-0.267261	-0.267261	-0.267261
OG0018022	N	N	Y		0	0		NA	NA	NA	NA		NA	NA		0	0	0	0	0	0	0	0	0	3	0	0	0	0	0	0	0	0			-0.267261	-0.267261	-0.267261	-0.267261	-0.267261	-0.267261	-0.267261	-0.267261	-0.267261	3.74166	-0.267261	-0.267261	-0.267261	-0.267261
OG0018033	N	N	Y		0	0		NA	NA	NA	NA		NA	NA		0	0	0	0	0	0	0	0	0	1	0	0	0	0	0	0	2	0			-0.267261	-0.267261	-0.267261	-0.267261	-0.267261	-0.267261	-0.267261	-0.267261	-0.267261	3.74166	-0.267261	-0.267261	-0.267261	-0.267261
OG0018036	N	N	Y		0	0		NA	NA	NA	NA		NA	NA		0	0	0	0	0	0	0	0	0	2	0	0	0	0	0	0	1	0			-0.267261	-0.267261	-0.267261	-0.267261	-0.267261	-0.267261	-0.267261	-0.267261	-0.267261	3.74166	-0.267261	-0.267261	-0.267261	-0.267261
OG0018050	N	N	Y		0	0		NA	NA	NA	NA		NA	NA		0	0	0	0	0	0	0	0	0	3	0	0	0	0	0	0	0	0			-0.267261	-0.267261	-0.267261	-0.267261	-0.267261	-0.267261	-0.267261	-0.267261	-0.267261	3.74166	-0.267261	-0.267261	-0.267261	-0.267261
OG0018052	N	N	Y		0	0		NA	NA	NA	NA		NA	NA		0	0	0	0	0	0	0	0	0	1	0	0	0	0	0	0	2	0			-0.267261	-0.267261	-0.267261	-0.267261	-0.267261	-0.267261	-0.267261	-0.267261	-0.267261	3.74166	-0.267261	-0.267261	-0.267261	-0.267261
OG0018053	N	N	Y		0	0		NA	NA	NA	NA		NA	NA		0	0	0	0	0	0	0	0	0	1	0	0	0	0	0	0	2	0			-0.267261	-0.267261	-0.267261	-0.267261	-0.267261	-0.267261	-0.267261	-0.267261	-0.267261	3.74166	-0.267261	-0.267261	-0.267261	-0.267261
OG0018057	N	N	Y		0	0		NA	NA	NA	NA		NA	NA		0	0	0	0	0	0	0	0	0	2	0	0	0	0	0	0	1	0			-0.267261	-0.267261	-0.267261	-0.267261	-0.267261	-0.267261	-0.267261	-0.267261	-0.267261	3.74166	-0.267261	-0.267261	-0.267261	-0.267261
OG0018058	N	N	Y		0	0		NA	NA	NA	NA		NA	NA		0	0	0	0	0	0	0	0	0	1	0	0	0	0	0	0	2	0			-0.267261	-0.267261	-0.267261	-0.267261	-0.267261	-0.267261	-0.267261	-0.267261	-0.267261	3.74166	-0.267261	-0.267261	-0.267261	-0.267261
OG0018060	N	N	Y		0	0		NA	NA	NA	NA		NA	NA		0	0	0	0	0	0	0	0	0	1	0	0	0	0	0	0	2	0			-0.267261	-0.267261	-0.267261	-0.267261	-0.267261	-0.267261	-0.267261	-0.267261	-0.267261	3.74166	-0.267261	-0.267261	-0.267261	-0.267261
OG0018061	N	N	Y		0	0		NA	NA	NA	NA		NA	NA		0	0	0	0	0	0	0	0	0	1	0	0	0	0	0	0	2	0			-0.267261	-0.267261	-0.267261	-0.267261	-0.267261	-0.267261	-0.267261	-0.267261	-0.267261	3.74166	-0.267261	-0.267261	-0.267261	-0.267261
OG0018066	N	N	Y		0	0		NA	NA	NA	NA		NA	NA		0	0	0	0	0	0	0	0	0	1	0	0	0	0	0	0	2	0			-0.267261	-0.267261	-0.267261	-0.267261	-0.267261	-0.267261	-0.267261	-0.267261	-0.267261	3.74166	-0.267261	-0.267261	-0.267261	-0.267261
OG0018067	N	N	Y		0	0		NA	NA	NA	NA		NA	NA		0	0	0	0	0	0	0	0	0	1	0	0	0	0	0	0	2	0			-0.267261	-0.267261	-0.267261	-0.267261	-0.267261	-0.267261	-0.267261	-0.267261	-0.267261	3.74166	-0.267261	-0.267261	-0.267261	-0.267261
OG0018069	N	N	Y		0	0		NA	NA	NA	NA		NA	NA		0	0	0	0	0	0	0	0	0	1	0	0	0	0	0	0	2	0			-0.267261	-0.267261	-0.267261	-0.267261	-0.267261	-0.267261	-0.267261	-0.267261	-0.267261	3.74166	-0.267261	-0.267261	-0.267261	-0.267261
OG0018071	N	N	Y		0	0		NA	NA	NA	NA		NA	NA		0	0	0	0	0	0	0	0	0	1	0	0	0	0	0	0	0	2			-0.267261	-0.267261	-0.267261	-0.267261	-0.267261	-0.267261	-0.267261	-0.267261	-0.267261	3.74166	-0.267261	-0.267261	-0.267261	-0.267261
OG0018072	N	N	Y		0	0		NA	NA	NA	NA		NA	NA		0	0	0	0	0	0	0	0	0	1	0	0	0	0	0	0	2	0			-0.267261	-0.267261	-0.267261	-0.267261	-0.267261	-0.267261	-0.267261	-0.267261	-0.267261	3.74166	-0.267261	-0.267261	-0.267261	-0.267261
OG0018078	N	N	Y		0	0		NA	NA	NA	NA		NA	NA		0	0	0	0	0	0	0	0	0	1	0	0	0	0	0	0	2	0			-0.267261	-0.267261	-0.267261	-0.267261	-0.267261	-0.267261	-0.267261	-0.267261	-0.267261	3.74166	-0.267261	-0.267261	-0.267261	-0.267261
OG0018079	N	N	Y		0	0		NA	NA	NA	NA		NA	NA		0	0	0	0	0	0	0	0	0	1	0	0	0	0	0	0	2	0			-0.267261	-0.267261	-0.267261	-0.267261	-0.267261	-0.267261	-0.267261	-0.267261	-0.267261	3.74166	-0.267261	-0.267261	-0.267261	-0.267261
OG0018081	N	N	Y		0	0		NA	NA	NA	NA		NA	NA		0	0	0	0	0	0	0	0	0	1	0	0	0	0	0	0	2	0			-0.267261	-0.267261	-0.267261	-0.267261	-0.267261	-0.267261	-0.267261	-0.267261	-0.267261	3.74166	-0.267261	-0.267261	-0.267261	-0.267261
OG0018086	N	N	Y		0	0		NA	NA	NA	NA		NA	NA		0	0	0	0	0	0	0	0	3	0	0	0	0	0	0	0	0	0			-0.267261	-0.267261	-0.267261	-0.267261	-0.267261	-0.267261	-0.267261	-0.267261	3.74166	-0.267261	-0.267261	-0.267261	-0.267261	-0.267261
OG0018102	N	N	Y		0	0		NA	NA	NA	NA		NA	NA		0	0	0	0	0	0	0	0	3	0	0	0	0	0	0	0	0	0			-0.267261	-0.267261	-0.267261	-0.267261	-0.267261	-0.267261	-0.267261	-0.267261	3.74166	-0.267261	-0.267261	-0.267261	-0.267261	-0.267261
OG0018107	N	N	Y		0	0		NA	NA	NA	NA		NA	NA		0	0	0	0	0	0	0	0	3	0	0	0	0	0	0	0	0	0			-0.267261	-0.267261	-0.267261	-0.267261	-0.267261	-0.267261	-0.267261	-0.267261	3.74166	-0.267261	-0.267261	-0.267261	-0.267261	-0.267261
OG0018156	N	N	Y		0	0		NA	NA	NA	NA		NA	NA		0	0	0	0	0	0	0	0	2	0	0	0	0	0	0	0	1	0			-0.267261	-0.267261	-0.267261	-0.267261	-0.267261	-0.267261	-0.267261	-0.267261	3.74166	-0.267261	-0.267261	-0.267261	-0.267261	-0.267261
OG0018184	N	N	Y		0	0		NA	NA	NA	NA		NA	NA		0	0	0	0	0	0	0	0	3	0	0	0	0	0	0	0	0	0			-0.267261	-0.267261	-0.267261	-0.267261	-0.267261	-0.267261	-0.267261	-0.267261	3.74166	-0.267261	-0.267261	-0.267261	-0.267261	-0.267261
OG0018217	N	N	Y		0	0		NA	NA	NA	NA		NA	NA		0	0	0	0	0	0	0	0	2	0	0	0	0	0	0	0	0	1			-0.267261	-0.267261	-0.267261	-0.267261	-0.267261	-0.267261	-0.267261	-0.267261	3.74166	-0.267261	-0.267261	-0.267261	-0.267261	-0.267261
OG0018237	N	N	Y		0	0		NA	NA	NA	NA		NA	NA		0	0	0	0	0	0	0	0	3	0	0	0	0	0	0	0	0	0			-0.267261	-0.267261	-0.267261	-0.267261	-0.267261	-0.267261	-0.267261	-0.267261	3.74166	-0.267261	-0.267261	-0.267261	-0.267261	-0.267261
OG0018247	N	N	Y		0	0		NA	NA	NA	NA		NA	NA		0	0	0	0	0	0	0	0	3	0	0	0	0	0	0	0	0	0			-0.267261	-0.267261	-0.267261	-0.267261	-0.267261	-0.267261	-0.267261	-0.267261	3.74166	-0.267261	-0.267261	-0.267261	-0.267261	-0.267261
OG0018259	N	N	Y		0	0		NA	NA	NA	NA		NA	NA		0	0	0	0	0	0	0	0	3	0	0	0	0	0	0	0	0	0			-0.267261	-0.267261	-0.267261	-0.267261	-0.267261	-0.267261	-0.267261	-0.267261	3.74166	-0.267261	-0.267261	-0.267261	-0.267261	-0.267261
OG0018261	N	N	Y		0	0		NA	NA	NA	NA		NA	NA		0	0	0	0	0	0	0	0	3	0	0	0	0	0	0	0	0	0			-0.267261	-0.267261	-0.267261	-0.267261	-0.267261	-0.267261	-0.267261	-0.267261	3.74166	-0.267261	-0.267261	-0.267261	-0.267261	-0.267261
OG0018286	N	N	Y		0	0		NA	NA	NA	NA		NA	NA		0	0	0	0	0	0	0	0	1	0	0	0	0	0	0	0	0	2			-0.267261	-0.267261	-0.267261	-0.267261	-0.267261	-0.267261	-0.267261	-0.267261	3.74166	-0.267261	-0.267261	-0.267261	-0.267261	-0.267261
OG0018309	N	N	Y		0	0		NA	NA	NA	NA		NA	NA		0	0	0	0	0	0	0	0	3	0	0	0	0	0	0	0	0	0			-0.267261	-0.267261	-0.267261	-0.267261	-0.267261	-0.267261	-0.267261	-0.267261	3.74166	-0.267261	-0.267261	-0.267261	-0.267261	-0.267261
OG0018336	N	N	Y		0	0		NA	NA	NA	NA		NA	NA		0	0	0	0	0	0	0	0	3	0	0	0	0	0	0	0	0	0			-0.267261	-0.267261	-0.267261	-0.267261	-0.267261	-0.267261	-0.267261	-0.267261	3.74166	-0.267261	-0.267261	-0.267261	-0.267261	-0.267261
OG0018341	N	N	Y		0	0		NA	NA	NA	NA		NA	NA		0	0	0	0	0	0	0	0	0	0	3	0	0	0	0	0	0	0			-0.267261	-0.267261	-0.267261	-0.267261	-0.267261	-0.267261	-0.267261	-0.267261	-0.267261	-0.267261	3.74166	-0.267261	-0.267261	-0.267261
OG0018342	N	N	Y		0	0		NA	NA	NA	NA		NA	NA		0	0	0	0	0	0	0	0	0	0	3	0	0	0	0	0	0	0			-0.267261	-0.267261	-0.267261	-0.267261	-0.267261	-0.267261	-0.267261	-0.267261	-0.267261	-0.267261	3.74166	-0.267261	-0.267261	-0.267261
OG0018343	N	N	Y		0	0		NA	NA	NA	NA		NA	NA		0	0	0	0	0	0	0	0	0	0	3	0	0	0	0	0	0	0			-0.267261	-0.267261	-0.267261	-0.267261	-0.267261	-0.267261	-0.267261	-0.267261	-0.267261	-0.267261	3.74166	-0.267261	-0.267261	-0.267261
OG0018344	N	N	Y		0	0		NA	NA	NA	NA		NA	NA		0	0	0	0	0	0	0	0	0	0	3	0	0	0	0	0	0	0			-0.267261	-0.267261	-0.267261	-0.267261	-0.267261	-0.267261	-0.267261	-0.267261	-0.267261	-0.267261	3.74166	-0.267261	-0.267261	-0.267261
OG0018345	N	N	Y		0	0		NA	NA	NA	NA		NA	NA		0	0	0	0	0	0	0	0	0	0	3	0	0	0	0	0	0	0			-0.267261	-0.267261	-0.267261	-0.267261	-0.267261	-0.267261	-0.267261	-0.267261	-0.267261	-0.267261	3.74166	-0.267261	-0.267261	-0.267261
OG0018346	N	N	Y		0	0		NA	NA	NA	NA		NA	NA		0	0	0	0	0	0	0	0	0	0	3	0	0	0	0	0	0	0			-0.267261	-0.267261	-0.267261	-0.267261	-0.267261	-0.267261	-0.267261	-0.267261	-0.267261	-0.267261	3.74166	-0.267261	-0.267261	-0.267261
OG0018347	N	N	Y		0	0		NA	NA	NA	NA		NA	NA		0	0	0	0	0	0	0	0	0	0	3	0	0	0	0	0	0	0			-0.267261	-0.267261	-0.267261	-0.267261	-0.267261	-0.267261	-0.267261	-0.267261	-0.267261	-0.267261	3.74166	-0.267261	-0.267261	-0.267261
OG0018348	N	N	Y		0	0		NA	NA	NA	NA		NA	NA		0	0	0	0	0	0	0	0	0	0	3	0	0	0	0	0	0	0			-0.267261	-0.267261	-0.267261	-0.267261	-0.267261	-0.267261	-0.267261	-0.267261	-0.267261	-0.267261	3.74166	-0.267261	-0.267261	-0.267261
OG0018349	N	N	Y		0	0		NA	NA	NA	NA		NA	NA		0	0	0	0	0	0	0	0	0	0	3	0	0	0	0	0	0	0			-0.267261	-0.267261	-0.267261	-0.267261	-0.267261	-0.267261	-0.267261	-0.267261	-0.267261	-0.267261	3.74166	-0.267261	-0.267261	-0.267261
OG0018350	N	N	Y		0	0		NA	NA	NA	NA		NA	NA		0	0	0	0	0	0	0	0	0	0	3	0	0	0	0	0	0	0			-0.267261	-0.267261	-0.267261	-0.267261	-0.267261	-0.267261	-0.267261	-0.267261	-0.267261	-0.267261	3.74166	-0.267261	-0.267261	-0.267261
OG0018351	N	N	Y		0	0		NA	NA	NA	NA		NA	NA		0	0	0	0	0	0	0	0	0	0	3	0	0	0	0	0	0	0			-0.267261	-0.267261	-0.267261	-0.267261	-0.267261	-0.267261	-0.267261	-0.267261	-0.267261	-0.267261	3.74166	-0.267261	-0.267261	-0.267261
OG0018352	N	N	Y		0	0		NA	NA	NA	NA		NA	NA		0	0	0	0	0	0	0	0	0	0	3	0	0	0	0	0	0	0			-0.267261	-0.267261	-0.267261	-0.267261	-0.267261	-0.267261	-0.267261	-0.267261	-0.267261	-0.267261	3.74166	-0.267261	-0.267261	-0.267261
OG0018353	N	N	Y		0	0		NA	NA	NA	NA		NA	NA		0	0	0	0	0	0	0	0	0	0	3	0	0	0	0	0	0	0			-0.267261	-0.267261	-0.267261	-0.267261	-0.267261	-0.267261	-0.267261	-0.267261	-0.267261	-0.267261	3.74166	-0.267261	-0.267261	-0.267261
OG0018354	N	N	Y		0	0		NA	NA	NA	NA		NA	NA		0	0	0	0	0	0	0	0	0	0	3	0	0	0	0	0	0	0			-0.267261	-0.267261	-0.267261	-0.267261	-0.267261	-0.267261	-0.267261	-0.267261	-0.267261	-0.267261	3.74166	-0.267261	-0.267261	-0.267261
OG0018355	N	N	Y		0	0		NA	NA	NA	NA		NA	NA		0	0	0	0	0	0	0	0	0	0	3	0	0	0	0	0	0	0			-0.267261	-0.267261	-0.267261	-0.267261	-0.267261	-0.267261	-0.267261	-0.267261	-0.267261	-0.267261	3.74166	-0.267261	-0.267261	-0.267261
OG0018356	N	N	Y		0	0		NA	NA	NA	NA		NA	NA		0	0	0	0	0	0	0	0	0	0	3	0	0	0	0	0	0	0			-0.267261	-0.267261	-0.267261	-0.267261	-0.267261	-0.267261	-0.267261	-0.267261	-0.267261	-0.267261	3.74166	-0.267261	-0.267261	-0.267261
OG0018357	N	N	Y		0	0		NA	NA	NA	NA		NA	NA		0	0	0	0	0	0	0	0	0	0	3	0	0	0	0	0	0	0			-0.267261	-0.267261	-0.267261	-0.267261	-0.267261	-0.267261	-0.267261	-0.267261	-0.267261	-0.267261	3.74166	-0.267261	-0.267261	-0.267261
OG0018358	N	N	Y		0	0		NA	NA	NA	NA		NA	NA		0	0	0	0	0	0	0	0	0	0	3	0	0	0	0	0	0	0			-0.267261	-0.267261	-0.267261	-0.267261	-0.267261	-0.267261	-0.267261	-0.267261	-0.267261	-0.267261	3.74166	-0.267261	-0.267261	-0.267261
OG0018359	N	N	Y		0	0		NA	NA	NA	NA		NA	NA		0	0	0	0	0	0	0	0	0	0	3	0	0	0	0	0	0	0			-0.267261	-0.267261	-0.267261	-0.267261	-0.267261	-0.267261	-0.267261	-0.267261	-0.267261	-0.267261	3.74166	-0.267261	-0.267261	-0.267261
OG0018360	N	N	Y		0	0		NA	NA	NA	NA		NA	NA		0	0	0	0	0	0	0	0	0	0	3	0	0	0	0	0	0	0			-0.267261	-0.267261	-0.267261	-0.267261	-0.267261	-0.267261	-0.267261	-0.267261	-0.267261	-0.267261	3.74166	-0.267261	-0.267261	-0.267261
OG0018361	N	N	Y		0	0		NA	NA	NA	NA		NA	NA		0	0	0	0	0	0	0	0	0	0	3	0	0	0	0	0	0	0			-0.267261	-0.267261	-0.267261	-0.267261	-0.267261	-0.267261	-0.267261	-0.267261	-0.267261	-0.267261	3.74166	-0.267261	-0.267261	-0.267261
OG0018362	N	N	Y		0	0		NA	NA	NA	NA		NA	NA		0	0	0	0	0	0	0	0	0	0	3	0	0	0	0	0	0	0			-0.267261	-0.267261	-0.267261	-0.267261	-0.267261	-0.267261	-0.267261	-0.267261	-0.267261	-0.267261	3.74166	-0.267261	-0.267261	-0.267261
OG0018363	N	N	Y		0	0		NA	NA	NA	NA		NA	NA		0	0	0	0	0	0	0	0	0	0	3	0	0	0	0	0	0	0			-0.267261	-0.267261	-0.267261	-0.267261	-0.267261	-0.267261	-0.267261	-0.267261	-0.267261	-0.267261	3.74166	-0.267261	-0.267261	-0.267261
OG0018364	N	N	Y		0	0		NA	NA	NA	NA		NA	NA		0	0	0	0	0	0	0	0	0	0	3	0	0	0	0	0	0	0			-0.267261	-0.267261	-0.267261	-0.267261	-0.267261	-0.267261	-0.267261	-0.267261	-0.267261	-0.267261	3.74166	-0.267261	-0.267261	-0.267261
OG0018365	N	N	Y		0	0		NA	NA	NA	NA		NA	NA		0	0	0	0	0	0	0	0	0	0	3	0	0	0	0	0	0	0			-0.267261	-0.267261	-0.267261	-0.267261	-0.267261	-0.267261	-0.267261	-0.267261	-0.267261	-0.267261	3.74166	-0.267261	-0.267261	-0.267261
OG0018366	N	N	Y		0	0		NA	NA	NA	NA		NA	NA		0	0	0	0	0	0	0	0	0	0	3	0	0	0	0	0	0	0			-0.267261	-0.267261	-0.267261	-0.267261	-0.267261	-0.267261	-0.267261	-0.267261	-0.267261	-0.267261	3.74166	-0.267261	-0.267261	-0.267261
OG0018367	N	N	Y		0	0		NA	NA	NA	NA		NA	NA		0	0	0	0	0	0	0	0	0	0	3	0	0	0	0	0	0	0			-0.267261	-0.267261	-0.267261	-0.267261	-0.267261	-0.267261	-0.267261	-0.267261	-0.267261	-0.267261	3.74166	-0.267261	-0.267261	-0.267261
OG0018368	N	N	Y		0	0		NA	NA	NA	NA		NA	NA		0	0	0	0	0	0	0	0	0	0	3	0	0	0	0	0	0	0			-0.267261	-0.267261	-0.267261	-0.267261	-0.267261	-0.267261	-0.267261	-0.267261	-0.267261	-0.267261	3.74166	-0.267261	-0.267261	-0.267261
OG0018369	N	N	Y		0	0		NA	NA	NA	NA		NA	NA		0	0	0	0	0	0	0	0	0	0	3	0	0	0	0	0	0	0			-0.267261	-0.267261	-0.267261	-0.267261	-0.267261	-0.267261	-0.267261	-0.267261	-0.267261	-0.267261	3.74166	-0.267261	-0.267261	-0.267261
OG0018370	N	N	Y		0	0		NA	NA	NA	NA		NA	NA		0	0	0	0	0	0	0	0	0	0	3	0	0	0	0	0	0	0			-0.267261	-0.267261	-0.267261	-0.267261	-0.267261	-0.267261	-0.267261	-0.267261	-0.267261	-0.267261	3.74166	-0.267261	-0.267261	-0.267261
OG0018371	N	N	Y		0	0		NA	NA	NA	NA		NA	NA		0	0	0	0	0	0	0	0	0	0	3	0	0	0	0	0	0	0			-0.267261	-0.267261	-0.267261	-0.267261	-0.267261	-0.267261	-0.267261	-0.267261	-0.267261	-0.267261	3.74166	-0.267261	-0.267261	-0.267261
OG0018373	N	N	Y		0	0		NA	NA	NA	NA		NA	NA		0	0	0	0	0	0	0	0	0	0	3	0	0	0	0	0	0	0			-0.267261	-0.267261	-0.267261	-0.267261	-0.267261	-0.267261	-0.267261	-0.267261	-0.267261	-0.267261	3.74166	-0.267261	-0.267261	-0.267261
OG0018374	N	N	Y		0	0		NA	NA	NA	NA		NA	NA		0	0	0	0	0	0	0	0	0	0	3	0	0	0	0	0	0	0			-0.267261	-0.267261	-0.267261	-0.267261	-0.267261	-0.267261	-0.267261	-0.267261	-0.267261	-0.267261	3.74166	-0.267261	-0.267261	-0.267261
OG0018375	N	N	Y		0	0		NA	NA	NA	NA		NA	NA		0	0	0	0	0	0	0	0	0	0	3	0	0	0	0	0	0	0			-0.267261	-0.267261	-0.267261	-0.267261	-0.267261	-0.267261	-0.267261	-0.267261	-0.267261	-0.267261	3.74166	-0.267261	-0.267261	-0.267261
OG0018376	N	N	Y		0	0		NA	NA	NA	NA		NA	NA		0	0	0	0	0	0	0	0	0	0	3	0	0	0	0	0	0	0			-0.267261	-0.267261	-0.267261	-0.267261	-0.267261	-0.267261	-0.267261	-0.267261	-0.267261	-0.267261	3.74166	-0.267261	-0.267261	-0.267261
OG0018377	N	N	Y		0	0		NA	NA	NA	NA		NA	NA		0	0	0	0	0	0	0	0	0	0	3	0	0	0	0	0	0	0			-0.267261	-0.267261	-0.267261	-0.267261	-0.267261	-0.267261	-0.267261	-0.267261	-0.267261	-0.267261	3.74166	-0.267261	-0.267261	-0.267261
OG0018378	N	N	Y		0	0		NA	NA	NA	NA		NA	NA		0	0	0	0	0	0	0	0	0	0	3	0	0	0	0	0	0	0			-0.267261	-0.267261	-0.267261	-0.267261	-0.267261	-0.267261	-0.267261	-0.267261	-0.267261	-0.267261	3.74166	-0.267261	-0.267261	-0.267261
OG0018379	N	N	Y		0	0		NA	NA	NA	NA		NA	NA		0	0	0	0	0	0	0	0	0	0	3	0	0	0	0	0	0	0			-0.267261	-0.267261	-0.267261	-0.267261	-0.267261	-0.267261	-0.267261	-0.267261	-0.267261	-0.267261	3.74166	-0.267261	-0.267261	-0.267261
OG0018380	N	N	Y		0	0		NA	NA	NA	NA		NA	NA		0	0	0	0	0	0	0	0	0	0	3	0	0	0	0	0	0	0			-0.267261	-0.267261	-0.267261	-0.267261	-0.267261	-0.267261	-0.267261	-0.267261	-0.267261	-0.267261	3.74166	-0.267261	-0.267261	-0.267261
OG0018381	N	N	Y		0	0		NA	NA	NA	NA		NA	NA		0	0	0	0	0	0	0	0	0	0	3	0	0	0	0	0	0	0			-0.267261	-0.267261	-0.267261	-0.267261	-0.267261	-0.267261	-0.267261	-0.267261	-0.267261	-0.267261	3.74166	-0.267261	-0.267261	-0.267261
OG0018382	N	N	Y		0	0		NA	NA	NA	NA		NA	NA		0	0	0	0	0	0	0	0	0	0	3	0	0	0	0	0	0	0			-0.267261	-0.267261	-0.267261	-0.267261	-0.267261	-0.267261	-0.267261	-0.267261	-0.267261	-0.267261	3.74166	-0.267261	-0.267261	-0.267261
OG0018383	N	N	Y		0	0		NA	NA	NA	NA		NA	NA		0	0	0	0	0	0	0	0	0	0	3	0	0	0	0	0	0	0			-0.267261	-0.267261	-0.267261	-0.267261	-0.267261	-0.267261	-0.267261	-0.267261	-0.267261	-0.267261	3.74166	-0.267261	-0.267261	-0.267261
OG0018384	N	N	Y		0	0		NA	NA	NA	NA		NA	NA		0	0	0	0	0	0	0	0	0	0	3	0	0	0	0	0	0	0			-0.267261	-0.267261	-0.267261	-0.267261	-0.267261	-0.267261	-0.267261	-0.267261	-0.267261	-0.267261	3.74166	-0.267261	-0.267261	-0.267261
OG0018385	N	N	Y		0	0		NA	NA	NA	NA		NA	NA		0	0	0	0	0	0	0	0	0	0	3	0	0	0	0	0	0	0			-0.267261	-0.267261	-0.267261	-0.267261	-0.267261	-0.267261	-0.267261	-0.267261	-0.267261	-0.267261	3.74166	-0.267261	-0.267261	-0.267261
OG0018386	N	N	Y		0	0		NA	NA	NA	NA		NA	NA		0	0	0	0	0	0	0	0	0	0	3	0	0	0	0	0	0	0			-0.267261	-0.267261	-0.267261	-0.267261	-0.267261	-0.267261	-0.267261	-0.267261	-0.267261	-0.267261	3.74166	-0.267261	-0.267261	-0.267261
OG0018387	N	N	Y		0	0		NA	NA	NA	NA		NA	NA		0	0	0	0	0	0	0	0	0	0	3	0	0	0	0	0	0	0			-0.267261	-0.267261	-0.267261	-0.267261	-0.267261	-0.267261	-0.267261	-0.267261	-0.267261	-0.267261	3.74166	-0.267261	-0.267261	-0.267261
OG0018390	N	N	Y		0	0		NA	NA	NA	NA		NA	NA		0	0	0	0	0	0	0	0	0	0	3	0	0	0	0	0	0	0			-0.267261	-0.267261	-0.267261	-0.267261	-0.267261	-0.267261	-0.267261	-0.267261	-0.267261	-0.267261	3.74166	-0.267261	-0.267261	-0.267261
OG0018392	N	N	Y		0	0		NA	NA	NA	NA		NA	NA		0	0	0	0	0	0	0	0	0	0	3	0	0	0	0	0	0	0			-0.267261	-0.267261	-0.267261	-0.267261	-0.267261	-0.267261	-0.267261	-0.267261	-0.267261	-0.267261	3.74166	-0.267261	-0.267261	-0.267261
OG0018393	N	N	Y		0	0		NA	NA	NA	NA		NA	NA		0	0	0	0	0	0	0	0	0	0	3	0	0	0	0	0	0	0			-0.267261	-0.267261	-0.267261	-0.267261	-0.267261	-0.267261	-0.267261	-0.267261	-0.267261	-0.267261	3.74166	-0.267261	-0.267261	-0.267261
OG0018397	N	N	Y		0	0		NA	NA	NA	NA		NA	NA		0	0	0	0	0	0	0	0	0	0	3	0	0	0	0	0	0	0			-0.267261	-0.267261	-0.267261	-0.267261	-0.267261	-0.267261	-0.267261	-0.267261	-0.267261	-0.267261	3.74166	-0.267261	-0.267261	-0.267261
OG0018417	N	N	Y		0	0		NA	NA	NA	NA		NA	NA		0	3	0	0	0	0	0	0	0	0	0	0	0	0	0	0	0	0			-0.267261	3.74166	-0.267261	-0.267261	-0.267261	-0.267261	-0.267261	-0.267261	-0.267261	-0.267261	-0.267261	-0.267261	-0.267261	-0.267261
OG0018421	N	N	Y		0	0		NA	NA	NA	NA		NA	NA		0	3	0	0	0	0	0	0	0	0	0	0	0	0	0	0	0	0			-0.267261	3.74166	-0.267261	-0.267261	-0.267261	-0.267261	-0.267261	-0.267261	-0.267261	-0.267261	-0.267261	-0.267261	-0.267261	-0.267261
OG0018434	N	N	Y		0	0		NA	NA	NA	NA		NA	NA		0	3	0	0	0	0	0	0	0	0	0	0	0	0	0	0	0	0			-0.267261	3.74166	-0.267261	-0.267261	-0.267261	-0.267261	-0.267261	-0.267261	-0.267261	-0.267261	-0.267261	-0.267261	-0.267261	-0.267261
OG0018445	N	N	Y		0	0		NA	NA	NA	NA		NA	NA		0	3	0	0	0	0	0	0	0	0	0	0	0	0	0	0	0	0			-0.267261	3.74166	-0.267261	-0.267261	-0.267261	-0.267261	-0.267261	-0.267261	-0.267261	-0.267261	-0.267261	-0.267261	-0.267261	-0.267261
OG0018469	N	N	Y		0	0		NA	NA	NA	NA		NA	NA		0	3	0	0	0	0	0	0	0	0	0	0	0	0	0	0	0	0			-0.267261	3.74166	-0.267261	-0.267261	-0.267261	-0.267261	-0.267261	-0.267261	-0.267261	-0.267261	-0.267261	-0.267261	-0.267261	-0.267261
OG0018476	N	N	Y		0	0		NA	NA	NA	NA		NA	NA		0	3	0	0	0	0	0	0	0	0	0	0	0	0	0	0	0	0			-0.267261	3.74166	-0.267261	-0.267261	-0.267261	-0.267261	-0.267261	-0.267261	-0.267261	-0.267261	-0.267261	-0.267261	-0.267261	-0.267261
OG0018485	N	N	Y		0	0		NA	NA	NA	NA		NA	NA		0	3	0	0	0	0	0	0	0	0	0	0	0	0	0	0	0	0			-0.267261	3.74166	-0.267261	-0.267261	-0.267261	-0.267261	-0.267261	-0.267261	-0.267261	-0.267261	-0.267261	-0.267261	-0.267261	-0.267261
OG0018523	N	N	Y		0	0		NA	NA	NA	NA		NA	NA		0	1	0	0	0	0	0	0	0	0	0	0	0	0	0	0	2	0			-0.267261	3.74166	-0.267261	-0.267261	-0.267261	-0.267261	-0.267261	-0.267261	-0.267261	-0.267261	-0.267261	-0.267261	-0.267261	-0.267261
OG0018541	N	N	Y		0	0		NA	NA	NA	NA		NA	NA		0	3	0	0	0	0	0	0	0	0	0	0	0	0	0	0	0	0			-0.267261	3.74166	-0.267261	-0.267261	-0.267261	-0.267261	-0.267261	-0.267261	-0.267261	-0.267261	-0.267261	-0.267261	-0.267261	-0.267261
OG0018619	N	N	Y		0	0		NA	NA	NA	NA		NA	NA		0	1	0	0	0	0	0	0	0	0	0	0	0	0	0	0	2	0			-0.267261	3.74166	-0.267261	-0.267261	-0.267261	-0.267261	-0.267261	-0.267261	-0.267261	-0.267261	-0.267261	-0.267261	-0.267261	-0.267261
OG0018622	N	N	Y		0	0		NA	NA	NA	NA		NA	NA		0	3	0	0	0	0	0	0	0	0	0	0	0	0	0	0	0	0			-0.267261	3.74166	-0.267261	-0.267261	-0.267261	-0.267261	-0.267261	-0.267261	-0.267261	-0.267261	-0.267261	-0.267261	-0.267261	-0.267261
OG0018635	N	N	Y		0	0		NA	NA	NA	NA		NA	NA		0	1	0	0	0	0	0	0	0	0	0	0	0	0	0	0	2	0			-0.267261	3.74166	-0.267261	-0.267261	-0.267261	-0.267261	-0.267261	-0.267261	-0.267261	-0.267261	-0.267261	-0.267261	-0.267261	-0.267261
OG0018656	N	N	Y		0	0		NA	NA	NA	NA		NA	NA		0	0	0	0	0	1	0	0	0	0	0	0	0	0	0	0	2	0			-0.267261	-0.267261	-0.267261	-0.267261	-0.267261	3.74166	-0.267261	-0.267261	-0.267261	-0.267261	-0.267261	-0.267261	-0.267261	-0.267261
OG0018657	N	N	Y		0	0		NA	NA	NA	NA		NA	NA		0	0	0	0	0	3	0	0	0	0	0	0	0	0	0	0	0	0			-0.267261	-0.267261	-0.267261	-0.267261	-0.267261	3.74166	-0.267261	-0.267261	-0.267261	-0.267261	-0.267261	-0.267261	-0.267261	-0.267261
OG0018661	N	N	Y		0	0		NA	NA	NA	NA		NA	NA		0	0	0	0	0	2	0	0	0	0	0	0	0	0	0	0	1	0			-0.267261	-0.267261	-0.267261	-0.267261	-0.267261	3.74166	-0.267261	-0.267261	-0.267261	-0.267261	-0.267261	-0.267261	-0.267261	-0.267261
OG0018669	N	N	Y		0	0		NA	NA	NA	NA		NA	NA		0	0	0	0	0	3	0	0	0	0	0	0	0	0	0	0	0	0			-0.267261	-0.267261	-0.267261	-0.267261	-0.267261	3.74166	-0.267261	-0.267261	-0.267261	-0.267261	-0.267261	-0.267261	-0.267261	-0.267261
OG0018671	N	N	Y		0	0		NA	NA	NA	NA		NA	NA		0	0	0	0	0	3	0	0	0	0	0	0	0	0	0	0	0	0			-0.267261	-0.267261	-0.267261	-0.267261	-0.267261	3.74166	-0.267261	-0.267261	-0.267261	-0.267261	-0.267261	-0.267261	-0.267261	-0.267261
OG0018674	N	N	Y		0	0		NA	NA	NA	NA		NA	NA		0	0	0	0	0	3	0	0	0	0	0	0	0	0	0	0	0	0			-0.267261	-0.267261	-0.267261	-0.267261	-0.267261	3.74166	-0.267261	-0.267261	-0.267261	-0.267261	-0.267261	-0.267261	-0.267261	-0.267261
OG0018677	N	N	Y		0	0		NA	NA	NA	NA		NA	NA		0	0	0	0	0	3	0	0	0	0	0	0	0	0	0	0	0	0			-0.267261	-0.267261	-0.267261	-0.267261	-0.267261	3.74166	-0.267261	-0.267261	-0.267261	-0.267261	-0.267261	-0.267261	-0.267261	-0.267261
OG0018678	N	N	Y		0	0		NA	NA	NA	NA		NA	NA		0	0	0	0	0	3	0	0	0	0	0	0	0	0	0	0	0	0			-0.267261	-0.267261	-0.267261	-0.267261	-0.267261	3.74166	-0.267261	-0.267261	-0.267261	-0.267261	-0.267261	-0.267261	-0.267261	-0.267261
OG0018683	N	N	Y		0	0		NA	NA	NA	NA		NA	NA		0	0	0	0	0	2	0	0	0	0	0	0	0	0	0	0	1	0			-0.267261	-0.267261	-0.267261	-0.267261	-0.267261	3.74166	-0.267261	-0.267261	-0.267261	-0.267261	-0.267261	-0.267261	-0.267261	-0.267261
OG0018688	N	N	Y		0	0		NA	NA	NA	NA		NA	NA		0	0	0	0	0	1	0	0	0	0	0	0	0	0	0	0	2	0			-0.267261	-0.267261	-0.267261	-0.267261	-0.267261	3.74166	-0.267261	-0.267261	-0.267261	-0.267261	-0.267261	-0.267261	-0.267261	-0.267261
OG0018689	N	N	Y		0	0		NA	NA	NA	NA		NA	NA		0	0	0	0	0	3	0	0	0	0	0	0	0	0	0	0	0	0			-0.267261	-0.267261	-0.267261	-0.267261	-0.267261	3.74166	-0.267261	-0.267261	-0.267261	-0.267261	-0.267261	-0.267261	-0.267261	-0.267261
OG0018690	N	N	Y		0	0		NA	NA	NA	NA		NA	NA		0	0	0	0	0	1	0	0	0	0	0	0	0	0	0	0	0	2			-0.267261	-0.267261	-0.267261	-0.267261	-0.267261	3.74166	-0.267261	-0.267261	-0.267261	-0.267261	-0.267261	-0.267261	-0.267261	-0.267261
OG0018706	N	N	Y		0	0		NA	NA	NA	NA		NA	NA		0	0	0	0	0	3	0	0	0	0	0	0	0	0	0	0	0	0			-0.267261	-0.267261	-0.267261	-0.267261	-0.267261	3.74166	-0.267261	-0.267261	-0.267261	-0.267261	-0.267261	-0.267261	-0.267261	-0.267261
OG0018708	N	N	Y		0	0		NA	NA	NA	NA		NA	NA		0	0	0	0	0	2	0	0	0	0	0	0	0	0	0	0	1	0			-0.267261	-0.267261	-0.267261	-0.267261	-0.267261	3.74166	-0.267261	-0.267261	-0.267261	-0.267261	-0.267261	-0.267261	-0.267261	-0.267261
OG0018709	N	N	Y		0	0		NA	NA	NA	NA		NA	NA		0	0	0	0	0	3	0	0	0	0	0	0	0	0	0	0	0	0			-0.267261	-0.267261	-0.267261	-0.267261	-0.267261	3.74166	-0.267261	-0.267261	-0.267261	-0.267261	-0.267261	-0.267261	-0.267261	-0.267261
OG0018710	N	N	Y		0	0		NA	NA	NA	NA		NA	NA		0	0	0	0	0	3	0	0	0	0	0	0	0	0	0	0	0	0			-0.267261	-0.267261	-0.267261	-0.267261	-0.267261	3.74166	-0.267261	-0.267261	-0.267261	-0.267261	-0.267261	-0.267261	-0.267261	-0.267261
OG0018713	N	N	Y		0	0		NA	NA	NA	NA		NA	NA		0	0	0	0	0	2	0	0	0	0	0	0	0	0	0	0	1	0			-0.267261	-0.267261	-0.267261	-0.267261	-0.267261	3.74166	-0.267261	-0.267261	-0.267261	-0.267261	-0.267261	-0.267261	-0.267261	-0.267261
OG0018716	N	N	Y		0	0		NA	NA	NA	NA		NA	NA		0	0	0	0	0	3	0	0	0	0	0	0	0	0	0	0	0	0			-0.267261	-0.267261	-0.267261	-0.267261	-0.267261	3.74166	-0.267261	-0.267261	-0.267261	-0.267261	-0.267261	-0.267261	-0.267261	-0.267261
OG0018719	N	N	Y		0	0		NA	NA	NA	NA		NA	NA		0	0	0	0	0	3	0	0	0	0	0	0	0	0	0	0	0	0			-0.267261	-0.267261	-0.267261	-0.267261	-0.267261	3.74166	-0.267261	-0.267261	-0.267261	-0.267261	-0.267261	-0.267261	-0.267261	-0.267261
OG0018720	N	N	Y		0	0		NA	NA	NA	NA		NA	NA		0	0	0	0	0	3	0	0	0	0	0	0	0	0	0	0	0	0			-0.267261	-0.267261	-0.267261	-0.267261	-0.267261	3.74166	-0.267261	-0.267261	-0.267261	-0.267261	-0.267261	-0.267261	-0.267261	-0.267261
OG0018723	N	N	Y		0	0		NA	NA	NA	NA		NA	NA		0	0	0	0	0	3	0	0	0	0	0	0	0	0	0	0	0	0			-0.267261	-0.267261	-0.267261	-0.267261	-0.267261	3.74166	-0.267261	-0.267261	-0.267261	-0.267261	-0.267261	-0.267261	-0.267261	-0.267261
OG0018730	N	N	Y		0	0		NA	NA	NA	NA		NA	NA		0	0	0	0	0	3	0	0	0	0	0	0	0	0	0	0	0	0			-0.267261	-0.267261	-0.267261	-0.267261	-0.267261	3.74166	-0.267261	-0.267261	-0.267261	-0.267261	-0.267261	-0.267261	-0.267261	-0.267261
OG0018731	N	N	Y		0	0		NA	NA	NA	NA		NA	NA		0	0	0	0	0	3	0	0	0	0	0	0	0	0	0	0	0	0			-0.267261	-0.267261	-0.267261	-0.267261	-0.267261	3.74166	-0.267261	-0.267261	-0.267261	-0.267261	-0.267261	-0.267261	-0.267261	-0.267261
OG0018733	N	N	Y		0	0		NA	NA	NA	NA		NA	NA		0	0	0	0	0	1	0	0	0	0	0	0	0	0	0	0	2	0			-0.267261	-0.267261	-0.267261	-0.267261	-0.267261	3.74166	-0.267261	-0.267261	-0.267261	-0.267261	-0.267261	-0.267261	-0.267261	-0.267261
OG0018742	N	N	Y		0	0		NA	NA	NA	NA		NA	NA		0	0	0	0	0	3	0	0	0	0	0	0	0	0	0	0	0	0			-0.267261	-0.267261	-0.267261	-0.267261	-0.267261	3.74166	-0.267261	-0.267261	-0.267261	-0.267261	-0.267261	-0.267261	-0.267261	-0.267261
OG0018746	N	N	Y		0	0		NA	NA	NA	NA		NA	NA		0	0	0	0	0	1	0	0	0	0	0	0	0	0	0	0	2	0			-0.267261	-0.267261	-0.267261	-0.267261	-0.267261	3.74166	-0.267261	-0.267261	-0.267261	-0.267261	-0.267261	-0.267261	-0.267261	-0.267261
OG0018747	N	N	Y		0	0		NA	NA	NA	NA		NA	NA		0	0	0	0	0	3	0	0	0	0	0	0	0	0	0	0	0	0			-0.267261	-0.267261	-0.267261	-0.267261	-0.267261	3.74166	-0.267261	-0.267261	-0.267261	-0.267261	-0.267261	-0.267261	-0.267261	-0.267261
OG0018750	N	N	Y		0	0		NA	NA	NA	NA		NA	NA		0	0	0	0	0	3	0	0	0	0	0	0	0	0	0	0	0	0			-0.267261	-0.267261	-0.267261	-0.267261	-0.267261	3.74166	-0.267261	-0.267261	-0.267261	-0.267261	-0.267261	-0.267261	-0.267261	-0.267261
OG0018751	N	N	Y		0	0		NA	NA	NA	NA		NA	NA		0	0	0	0	0	2	0	0	0	0	0	0	0	0	0	0	1	0			-0.267261	-0.267261	-0.267261	-0.267261	-0.267261	3.74166	-0.267261	-0.267261	-0.267261	-0.267261	-0.267261	-0.267261	-0.267261	-0.267261
OG0018759	N	N	Y		0	0		NA	NA	NA	NA		NA	NA		0	0	0	0	0	0	0	0	0	0	0	0	0	0	0	0	2	1			#NUM!	#NUM!	#NUM!	#NUM!	#NUM!	#NUM!	#NUM!	#NUM!	#NUM!	#NUM!	#NUM!	#NUM!	#NUM!	#NUM!
OG0018760	N	N	Y		0	0		NA	NA	NA	NA		NA	NA		1	0	0	0	0	0	0	0	0	0	0	0	0	0	0	0	2	0			3.74166	-0.267261	-0.267261	-0.267261	-0.267261	-0.267261	-0.267261	-0.267261	-0.267261	-0.267261	-0.267261	-0.267261	-0.267261	-0.267261
OG0018761	N	N	Y		0	0		NA	NA	NA	NA		NA	NA		0	0	0	0	0	0	1	0	0	0	0	0	0	0	0	0	2	0			-0.267261	-0.267261	-0.267261	-0.267261	-0.267261	-0.267261	3.74166	-0.267261	-0.267261	-0.267261	-0.267261	-0.267261	-0.267261	-0.267261
OG0018762	N	N	Y		0	0		NA	NA	NA	NA		NA	NA		0	0	0	0	0	0	0	0	0	0	0	0	0	0	0	0	3	0			#NUM!	#NUM!	#NUM!	#NUM!	#NUM!	#NUM!	#NUM!	#NUM!	#NUM!	#NUM!	#NUM!	#NUM!	#NUM!	#NUM!
OG0018763	N	N	Y		0	0		NA	NA	NA	NA		NA	NA		0	0	0	0	0	0	0	0	0	0	0	0	0	0	0	0	3	0			#NUM!	#NUM!	#NUM!	#NUM!	#NUM!	#NUM!	#NUM!	#NUM!	#NUM!	#NUM!	#NUM!	#NUM!	#NUM!	#NUM!
OG0018764	N	N	Y		0	0		NA	NA	NA	NA		NA	NA		0	0	0	0	0	0	1	0	0	0	0	0	0	0	0	0	2	0			-0.267261	-0.267261	-0.267261	-0.267261	-0.267261	-0.267261	3.74166	-0.267261	-0.267261	-0.267261	-0.267261	-0.267261	-0.267261	-0.267261
OG0018765	N	N	Y		0	0		NA	NA	NA	NA		NA	NA		0	0	0	0	1	0	0	0	0	0	0	0	0	0	0	0	2	0			-0.267261	-0.267261	-0.267261	-0.267261	3.74166	-0.267261	-0.267261	-0.267261	-0.267261	-0.267261	-0.267261	-0.267261	-0.267261	-0.267261
OG0018766	N	N	Y		0	0		NA	NA	NA	NA		NA	NA		0	0	0	0	0	0	0	0	0	0	0	0	0	0	0	0	3	0			#NUM!	#NUM!	#NUM!	#NUM!	#NUM!	#NUM!	#NUM!	#NUM!	#NUM!	#NUM!	#NUM!	#NUM!	#NUM!	#NUM!
OG0018767	N	N	Y		0	0		NA	NA	NA	NA		NA	NA		0	0	0	0	0	0	0	0	0	0	0	0	0	0	0	0	3	0			#NUM!	#NUM!	#NUM!	#NUM!	#NUM!	#NUM!	#NUM!	#NUM!	#NUM!	#NUM!	#NUM!	#NUM!	#NUM!	#NUM!
OG0018768	N	N	Y		0	0		NA	NA	NA	NA		NA	NA		0	0	0	0	0	0	0	0	0	0	0	0	0	0	0	0	3	0			#NUM!	#NUM!	#NUM!	#NUM!	#NUM!	#NUM!	#NUM!	#NUM!	#NUM!	#NUM!	#NUM!	#NUM!	#NUM!	#NUM!
OG0018769	N	N	Y		0	0		NA	NA	NA	NA		NA	NA		0	0	0	0	0	0	0	0	0	0	0	0	0	0	0	0	3	0			#NUM!	#NUM!	#NUM!	#NUM!	#NUM!	#NUM!	#NUM!	#NUM!	#NUM!	#NUM!	#NUM!	#NUM!	#NUM!	#NUM!
OG0018770	N	N	Y		0	0		NA	NA	NA	NA		NA	NA		0	0	0	0	0	0	0	0	0	0	0	0	0	0	0	0	3	0			#NUM!	#NUM!	#NUM!	#NUM!	#NUM!	#NUM!	#NUM!	#NUM!	#NUM!	#NUM!	#NUM!	#NUM!	#NUM!	#NUM!
OG0018771	N	N	Y		0	0		NA	NA	NA	NA		NA	NA		0	0	0	0	0	0	0	0	0	0	0	0	0	0	0	0	3	0			#NUM!	#NUM!	#NUM!	#NUM!	#NUM!	#NUM!	#NUM!	#NUM!	#NUM!	#NUM!	#NUM!	#NUM!	#NUM!	#NUM!
OG0018772	N	N	Y		0	0		NA	NA	NA	NA		NA	NA		0	0	0	0	0	0	0	0	0	0	0	0	0	0	0	0	3	0			#NUM!	#NUM!	#NUM!	#NUM!	#NUM!	#NUM!	#NUM!	#NUM!	#NUM!	#NUM!	#NUM!	#NUM!	#NUM!	#NUM!
OG0018773	N	N	Y		0	0		NA	NA	NA	NA		NA	NA		0	0	0	0	0	0	0	1	0	0	0	0	0	0	0	0	2	0			-0.267261	-0.267261	-0.267261	-0.267261	-0.267261	-0.267261	-0.267261	3.74166	-0.267261	-0.267261	-0.267261	-0.267261	-0.267261	-0.267261
OG0018774	N	N	Y		0	0		NA	NA	NA	NA		NA	NA		0	0	0	0	0	0	0	0	0	0	0	0	0	0	0	0	3	0			#NUM!	#NUM!	#NUM!	#NUM!	#NUM!	#NUM!	#NUM!	#NUM!	#NUM!	#NUM!	#NUM!	#NUM!	#NUM!	#NUM!
OG0018775	N	N	Y		0	0		NA	NA	NA	NA		NA	NA		0	0	0	0	0	0	0	0	0	0	0	0	0	0	0	0	3	0			#NUM!	#NUM!	#NUM!	#NUM!	#NUM!	#NUM!	#NUM!	#NUM!	#NUM!	#NUM!	#NUM!	#NUM!	#NUM!	#NUM!
OG0018776	N	N	Y		0	0		NA	NA	NA	NA		NA	NA		0	0	0	0	0	0	0	0	0	0	0	0	0	0	0	0	3	0			#NUM!	#NUM!	#NUM!	#NUM!	#NUM!	#NUM!	#NUM!	#NUM!	#NUM!	#NUM!	#NUM!	#NUM!	#NUM!	#NUM!
OG0018777	N	N	Y		0	0		NA	NA	NA	NA		NA	NA		0	0	0	0	0	0	0	0	0	0	0	0	0	0	0	0	3	0			#NUM!	#NUM!	#NUM!	#NUM!	#NUM!	#NUM!	#NUM!	#NUM!	#NUM!	#NUM!	#NUM!	#NUM!	#NUM!	#NUM!
OG0018778	N	N	Y		0	0		NA	NA	NA	NA		NA	NA		0	0	0	0	0	0	0	0	0	0	0	0	0	0	0	0	3	0			#NUM!	#NUM!	#NUM!	#NUM!	#NUM!	#NUM!	#NUM!	#NUM!	#NUM!	#NUM!	#NUM!	#NUM!	#NUM!	#NUM!
OG0018779	N	N	Y		0	0		NA	NA	NA	NA		NA	NA		0	0	0	0	0	0	0	0	0	0	0	0	0	0	0	0	3	0			#NUM!	#NUM!	#NUM!	#NUM!	#NUM!	#NUM!	#NUM!	#NUM!	#NUM!	#NUM!	#NUM!	#NUM!	#NUM!	#NUM!
OG0018780	N	N	Y		0	0		NA	NA	NA	NA		NA	NA		0	0	0	0	0	0	0	0	0	0	0	0	0	0	0	0	3	0			#NUM!	#NUM!	#NUM!	#NUM!	#NUM!	#NUM!	#NUM!	#NUM!	#NUM!	#NUM!	#NUM!	#NUM!	#NUM!	#NUM!
OG0018781	N	N	Y		0	0		NA	NA	NA	NA		NA	NA		0	0	0	0	1	0	0	0	0	0	0	0	0	0	0	0	2	0			-0.267261	-0.267261	-0.267261	-0.267261	3.74166	-0.267261	-0.267261	-0.267261	-0.267261	-0.267261	-0.267261	-0.267261	-0.267261	-0.267261
OG0018782	N	N	Y		0	0		NA	NA	NA	NA		NA	NA		0	0	0	0	0	0	0	0	0	0	0	0	0	0	0	0	3	0			#NUM!	#NUM!	#NUM!	#NUM!	#NUM!	#NUM!	#NUM!	#NUM!	#NUM!	#NUM!	#NUM!	#NUM!	#NUM!	#NUM!
OG0018783	N	N	Y		0	0		NA	NA	NA	NA		NA	NA		0	0	0	0	0	0	0	0	0	0	0	0	0	0	0	0	3	0			#NUM!	#NUM!	#NUM!	#NUM!	#NUM!	#NUM!	#NUM!	#NUM!	#NUM!	#NUM!	#NUM!	#NUM!	#NUM!	#NUM!
OG0018784	N	N	Y		0	0		NA	NA	NA	NA		NA	NA		0	0	0	0	0	0	0	0	0	0	0	0	0	0	0	0	3	0			#NUM!	#NUM!	#NUM!	#NUM!	#NUM!	#NUM!	#NUM!	#NUM!	#NUM!	#NUM!	#NUM!	#NUM!	#NUM!	#NUM!
OG0018785	N	N	Y		0	0		NA	NA	NA	NA		NA	NA		0	0	0	0	0	0	0	0	0	0	0	0	0	0	0	0	3	0			#NUM!	#NUM!	#NUM!	#NUM!	#NUM!	#NUM!	#NUM!	#NUM!	#NUM!	#NUM!	#NUM!	#NUM!	#NUM!	#NUM!
OG0018786	N	N	Y		0	0		NA	NA	NA	NA		NA	NA		0	0	0	0	0	0	0	0	0	0	0	0	0	0	0	0	3	0			#NUM!	#NUM!	#NUM!	#NUM!	#NUM!	#NUM!	#NUM!	#NUM!	#NUM!	#NUM!	#NUM!	#NUM!	#NUM!	#NUM!
OG0018787	N	N	Y		0	0		NA	NA	NA	NA		NA	NA		0	0	0	0	0	0	0	0	0	0	0	0	0	0	0	0	3	0			#NUM!	#NUM!	#NUM!	#NUM!	#NUM!	#NUM!	#NUM!	#NUM!	#NUM!	#NUM!	#NUM!	#NUM!	#NUM!	#NUM!
OG0018788	N	N	Y		0	0		NA	NA	NA	NA		NA	NA		0	0	0	0	0	0	0	0	0	0	0	0	0	0	0	0	3	0			#NUM!	#NUM!	#NUM!	#NUM!	#NUM!	#NUM!	#NUM!	#NUM!	#NUM!	#NUM!	#NUM!	#NUM!	#NUM!	#NUM!
OG0018789	N	N	Y		0	0		NA	NA	NA	NA		NA	NA		0	0	0	0	0	0	0	0	0	0	0	0	0	0	0	0	3	0			#NUM!	#NUM!	#NUM!	#NUM!	#NUM!	#NUM!	#NUM!	#NUM!	#NUM!	#NUM!	#NUM!	#NUM!	#NUM!	#NUM!
OG0018790	N	N	Y		0	0		NA	NA	NA	NA		NA	NA		0	0	0	0	0	0	0	0	0	0	0	0	0	0	0	0	3	0			#NUM!	#NUM!	#NUM!	#NUM!	#NUM!	#NUM!	#NUM!	#NUM!	#NUM!	#NUM!	#NUM!	#NUM!	#NUM!	#NUM!
OG0018791	N	N	Y		0	0		NA	NA	NA	NA		NA	NA		0	0	0	0	0	0	0	0	0	0	0	0	0	0	0	0	3	0			#NUM!	#NUM!	#NUM!	#NUM!	#NUM!	#NUM!	#NUM!	#NUM!	#NUM!	#NUM!	#NUM!	#NUM!	#NUM!	#NUM!
OG0018792	N	N	Y		0	0		NA	NA	NA	NA		NA	NA		0	0	0	0	0	0	0	0	0	0	0	0	0	0	0	0	3	0			#NUM!	#NUM!	#NUM!	#NUM!	#NUM!	#NUM!	#NUM!	#NUM!	#NUM!	#NUM!	#NUM!	#NUM!	#NUM!	#NUM!
OG0018793	N	N	Y		0	0		NA	NA	NA	NA		NA	NA		0	0	0	0	0	0	0	2	0	0	0	0	0	0	0	0	1	0			-0.267261	-0.267261	-0.267261	-0.267261	-0.267261	-0.267261	-0.267261	3.74166	-0.267261	-0.267261	-0.267261	-0.267261	-0.267261	-0.267261
OG0018794	N	N	Y		0	0		NA	NA	NA	NA		NA	NA		0	0	0	0	0	0	0	0	0	0	0	0	0	0	0	0	3	0			#NUM!	#NUM!	#NUM!	#NUM!	#NUM!	#NUM!	#NUM!	#NUM!	#NUM!	#NUM!	#NUM!	#NUM!	#NUM!	#NUM!
OG0018795	N	N	Y		0	0		NA	NA	NA	NA		NA	NA		0	0	0	0	3	0	0	0	0	0	0	0	0	0	0	0	0	0			-0.267261	-0.267261	-0.267261	-0.267261	3.74166	-0.267261	-0.267261	-0.267261	-0.267261	-0.267261	-0.267261	-0.267261	-0.267261	-0.267261
OG0018796	N	N	Y		0	0		NA	NA	NA	NA		NA	NA		0	0	0	0	3	0	0	0	0	0	0	0	0	0	0	0	0	0			-0.267261	-0.267261	-0.267261	-0.267261	3.74166	-0.267261	-0.267261	-0.267261	-0.267261	-0.267261	-0.267261	-0.267261	-0.267261	-0.267261
OG0018804	N	N	Y		0	0		NA	NA	NA	NA		NA	NA		0	0	0	0	3	0	0	0	0	0	0	0	0	0	0	0	0	0			-0.267261	-0.267261	-0.267261	-0.267261	3.74166	-0.267261	-0.267261	-0.267261	-0.267261	-0.267261	-0.267261	-0.267261	-0.267261	-0.267261
OG0018805	N	N	Y		0	0		NA	NA	NA	NA		NA	NA		0	0	0	0	3	0	0	0	0	0	0	0	0	0	0	0	0	0			-0.267261	-0.267261	-0.267261	-0.267261	3.74166	-0.267261	-0.267261	-0.267261	-0.267261	-0.267261	-0.267261	-0.267261	-0.267261	-0.267261
OG0018807	N	N	Y		0	0		NA	NA	NA	NA		NA	NA		0	0	0	0	1	0	0	0	0	0	0	0	0	0	0	0	0	2			-0.267261	-0.267261	-0.267261	-0.267261	3.74166	-0.267261	-0.267261	-0.267261	-0.267261	-0.267261	-0.267261	-0.267261	-0.267261	-0.267261
OG0018813	N	N	Y		0	0		NA	NA	NA	NA		NA	NA		0	0	0	0	3	0	0	0	0	0	0	0	0	0	0	0	0	0			-0.267261	-0.267261	-0.267261	-0.267261	3.74166	-0.267261	-0.267261	-0.267261	-0.267261	-0.267261	-0.267261	-0.267261	-0.267261	-0.267261
OG0019015	N	N	Y		0	0		NA	NA	NA	NA		NA	NA		0	0	0	0	0	0	0	0	0	0	0	0	0	3	0	0	0	0			-0.267261	-0.267261	-0.267261	-0.267261	-0.267261	-0.267261	-0.267261	-0.267261	-0.267261	-0.267261	-0.267261	-0.267261	-0.267261	3.74166
OG0019168	N	N	Y		0	0		NA	NA	NA	NA		NA	NA		0	0	0	0	0	0	0	0	0	0	0	0	0	3	0	0	0	0			-0.267261	-0.267261	-0.267261	-0.267261	-0.267261	-0.267261	-0.267261	-0.267261	-0.267261	-0.267261	-0.267261	-0.267261	-0.267261	3.74166
OG0019289	N	N	Y		0	0		NA	NA	NA	NA		NA	NA		0	0	0	0	0	0	3	0	0	0	0	0	0	0	0	0	0	0			-0.267261	-0.267261	-0.267261	-0.267261	-0.267261	-0.267261	3.74166	-0.267261	-0.267261	-0.267261	-0.267261	-0.267261	-0.267261	-0.267261
OG0019290	N	N	Y		0	0		NA	NA	NA	NA		NA	NA		0	0	0	0	0	0	3	0	0	0	0	0	0	0	0	0	0	0			-0.267261	-0.267261	-0.267261	-0.267261	-0.267261	-0.267261	3.74166	-0.267261	-0.267261	-0.267261	-0.267261	-0.267261	-0.267261	-0.267261
OG0019291	N	N	Y		0	0		NA	NA	NA	NA		NA	NA		0	0	0	0	0	0	3	0	0	0	0	0	0	0	0	0	0	0			-0.267261	-0.267261	-0.267261	-0.267261	-0.267261	-0.267261	3.74166	-0.267261	-0.267261	-0.267261	-0.267261	-0.267261	-0.267261	-0.267261
OG0019292	N	N	Y		0	0		NA	NA	NA	NA		NA	NA		0	0	0	0	0	0	3	0	0	0	0	0	0	0	0	0	0	0			-0.267261	-0.267261	-0.267261	-0.267261	-0.267261	-0.267261	3.74166	-0.267261	-0.267261	-0.267261	-0.267261	-0.267261	-0.267261	-0.267261
OG0019293	N	N	Y		0	0		NA	NA	NA	NA		NA	NA		0	0	0	0	0	0	3	0	0	0	0	0	0	0	0	0	0	0			-0.267261	-0.267261	-0.267261	-0.267261	-0.267261	-0.267261	3.74166	-0.267261	-0.267261	-0.267261	-0.267261	-0.267261	-0.267261	-0.267261
OG0019294	N	N	Y		0	0		NA	NA	NA	NA		NA	NA		0	0	0	0	0	0	3	0	0	0	0	0	0	0	0	0	0	0			-0.267261	-0.267261	-0.267261	-0.267261	-0.267261	-0.267261	3.74166	-0.267261	-0.267261	-0.267261	-0.267261	-0.267261	-0.267261	-0.267261
OG0019295	N	N	Y		0	0		NA	NA	NA	NA		NA	NA		0	0	0	0	0	0	3	0	0	0	0	0	0	0	0	0	0	0			-0.267261	-0.267261	-0.267261	-0.267261	-0.267261	-0.267261	3.74166	-0.267261	-0.267261	-0.267261	-0.267261	-0.267261	-0.267261	-0.267261
OG0019296	N	N	Y		0	0		NA	NA	NA	NA		NA	NA		0	0	0	0	0	0	3	0	0	0	0	0	0	0	0	0	0	0			-0.267261	-0.267261	-0.267261	-0.267261	-0.267261	-0.267261	3.74166	-0.267261	-0.267261	-0.267261	-0.267261	-0.267261	-0.267261	-0.267261
OG0019297	N	N	Y		0	0		NA	NA	NA	NA		NA	NA		0	0	0	0	0	0	3	0	0	0	0	0	0	0	0	0	0	0			-0.267261	-0.267261	-0.267261	-0.267261	-0.267261	-0.267261	3.74166	-0.267261	-0.267261	-0.267261	-0.267261	-0.267261	-0.267261	-0.267261
OG0019299	N	N	Y		0	0		NA	NA	NA	NA		NA	NA		0	0	0	0	0	0	3	0	0	0	0	0	0	0	0	0	0	0			-0.267261	-0.267261	-0.267261	-0.267261	-0.267261	-0.267261	3.74166	-0.267261	-0.267261	-0.267261	-0.267261	-0.267261	-0.267261	-0.267261
OG0019300	N	N	Y		0	0		NA	NA	NA	NA		NA	NA		0	0	0	0	0	0	3	0	0	0	0	0	0	0	0	0	0	0			-0.267261	-0.267261	-0.267261	-0.267261	-0.267261	-0.267261	3.74166	-0.267261	-0.267261	-0.267261	-0.267261	-0.267261	-0.267261	-0.267261
OG0019301	N	N	Y		0	0		NA	NA	NA	NA		NA	NA		0	0	0	0	0	0	3	0	0	0	0	0	0	0	0	0	0	0			-0.267261	-0.267261	-0.267261	-0.267261	-0.267261	-0.267261	3.74166	-0.267261	-0.267261	-0.267261	-0.267261	-0.267261	-0.267261	-0.267261
OG0019302	N	N	Y		0	0		NA	NA	NA	NA		NA	NA		0	0	0	0	0	0	3	0	0	0	0	0	0	0	0	0	0	0			-0.267261	-0.267261	-0.267261	-0.267261	-0.267261	-0.267261	3.74166	-0.267261	-0.267261	-0.267261	-0.267261	-0.267261	-0.267261	-0.267261
OG0019303	N	N	Y		0	0		NA	NA	NA	NA		NA	NA		0	0	0	0	0	0	3	0	0	0	0	0	0	0	0	0	0	0			-0.267261	-0.267261	-0.267261	-0.267261	-0.267261	-0.267261	3.74166	-0.267261	-0.267261	-0.267261	-0.267261	-0.267261	-0.267261	-0.267261
OG0019304	N	N	Y		0	0		NA	NA	NA	NA		NA	NA		0	0	0	0	0	0	3	0	0	0	0	0	0	0	0	0	0	0			-0.267261	-0.267261	-0.267261	-0.267261	-0.267261	-0.267261	3.74166	-0.267261	-0.267261	-0.267261	-0.267261	-0.267261	-0.267261	-0.267261
OG0019305	N	N	Y		0	0		NA	NA	NA	NA		NA	NA		0	0	0	0	0	0	3	0	0	0	0	0	0	0	0	0	0	0			-0.267261	-0.267261	-0.267261	-0.267261	-0.267261	-0.267261	3.74166	-0.267261	-0.267261	-0.267261	-0.267261	-0.267261	-0.267261	-0.267261
OG0019306	N	N	Y		0	0		NA	NA	NA	NA		NA	NA		0	0	0	0	0	0	3	0	0	0	0	0	0	0	0	0	0	0			-0.267261	-0.267261	-0.267261	-0.267261	-0.267261	-0.267261	3.74166	-0.267261	-0.267261	-0.267261	-0.267261	-0.267261	-0.267261	-0.267261
OG0019307	N	N	Y		0	0		NA	NA	NA	NA		NA	NA		0	0	0	0	0	0	3	0	0	0	0	0	0	0	0	0	0	0			-0.267261	-0.267261	-0.267261	-0.267261	-0.267261	-0.267261	3.74166	-0.267261	-0.267261	-0.267261	-0.267261	-0.267261	-0.267261	-0.267261
OG0019308	N	N	Y		0	0		NA	NA	NA	NA		NA	NA		3	0	0	0	0	0	0	0	0	0	0	0	0	0	0	0	0	0			3.74166	-0.267261	-0.267261	-0.267261	-0.267261	-0.267261	-0.267261	-0.267261	-0.267261	-0.267261	-0.267261	-0.267261	-0.267261	-0.267261
OG0019310	N	N	Y		0	0		NA	NA	NA	NA		NA	NA		3	0	0	0	0	0	0	0	0	0	0	0	0	0	0	0	0	0			3.74166	-0.267261	-0.267261	-0.267261	-0.267261	-0.267261	-0.267261	-0.267261	-0.267261	-0.267261	-0.267261	-0.267261	-0.267261	-0.267261
OG0019311	N	N	Y		0	0		NA	NA	NA	NA		NA	NA		3	0	0	0	0	0	0	0	0	0	0	0	0	0	0	0	0	0			3.74166	-0.267261	-0.267261	-0.267261	-0.267261	-0.267261	-0.267261	-0.267261	-0.267261	-0.267261	-0.267261	-0.267261	-0.267261	-0.267261
OG0019313	N	N	Y		0	0		NA	NA	NA	NA		NA	NA		3	0	0	0	0	0	0	0	0	0	0	0	0	0	0	0	0	0			3.74166	-0.267261	-0.267261	-0.267261	-0.267261	-0.267261	-0.267261	-0.267261	-0.267261	-0.267261	-0.267261	-0.267261	-0.267261	-0.267261
OG0019314	N	N	Y		0	0		NA	NA	NA	NA		NA	NA		0	0	0	0	0	0	0	0	0	0	0	0	0	0	0	0	0	3			#NUM!	#NUM!	#NUM!	#NUM!	#NUM!	#NUM!	#NUM!	#NUM!	#NUM!	#NUM!	#NUM!	#NUM!	#NUM!	#NUM!
OG0019315	N	N	Y		0	0		NA	NA	NA	NA		NA	NA		0	0	0	0	0	0	0	0	0	0	0	0	0	0	0	0	0	3			#NUM!	#NUM!	#NUM!	#NUM!	#NUM!	#NUM!	#NUM!	#NUM!	#NUM!	#NUM!	#NUM!	#NUM!	#NUM!	#NUM!
OG0019316	N	N	Y		0	0		NA	NA	NA	NA		NA	NA		0	0	0	0	0	0	0	0	0	0	0	0	0	0	1	0	0	2			-0.267261	-0.267261	-0.267261	-0.267261	-0.267261	-0.267261	-0.267261	-0.267261	-0.267261	-0.267261	-0.267261	-0.267261	-0.267261	-0.267261
OG0019317	N	N	Y		0	0		NA	NA	NA	NA		NA	NA		0	0	0	0	0	0	0	0	0	0	0	0	0	0	0	0	0	3			#NUM!	#NUM!	#NUM!	#NUM!	#NUM!	#NUM!	#NUM!	#NUM!	#NUM!	#NUM!	#NUM!	#NUM!	#NUM!	#NUM!
OG0019318	N	N	Y		0	0		NA	NA	NA	NA		NA	NA		0	0	0	0	0	0	0	0	0	0	0	0	0	0	0	0	0	3			#NUM!	#NUM!	#NUM!	#NUM!	#NUM!	#NUM!	#NUM!	#NUM!	#NUM!	#NUM!	#NUM!	#NUM!	#NUM!	#NUM!
OG0019319	N	N	Y		0	0		NA	NA	NA	NA		NA	NA		0	0	0	0	0	0	0	0	0	0	0	0	0	0	0	0	0	3			#NUM!	#NUM!	#NUM!	#NUM!	#NUM!	#NUM!	#NUM!	#NUM!	#NUM!	#NUM!	#NUM!	#NUM!	#NUM!	#NUM!
OG0019320	N	N	Y		0	0		NA	NA	NA	NA		NA	NA		0	0	0	0	0	0	0	1	0	0	0	0	0	0	0	0	0	2			-0.267261	-0.267261	-0.267261	-0.267261	-0.267261	-0.267261	-0.267261	3.74166	-0.267261	-0.267261	-0.267261	-0.267261	-0.267261	-0.267261
OG0019321	N	N	Y		0	0		NA	NA	NA	NA		NA	NA		0	0	0	0	0	0	0	0	0	0	0	0	0	0	1	0	0	2			-0.267261	-0.267261	-0.267261	-0.267261	-0.267261	-0.267261	-0.267261	-0.267261	-0.267261	-0.267261	-0.267261	-0.267261	-0.267261	-0.267261
OG0019322	N	N	Y		0	0		NA	NA	NA	NA		NA	NA		0	0	0	0	0	0	0	0	0	0	0	0	0	0	0	0	0	3			#NUM!	#NUM!	#NUM!	#NUM!	#NUM!	#NUM!	#NUM!	#NUM!	#NUM!	#NUM!	#NUM!	#NUM!	#NUM!	#NUM!
OG0019323	N	N	Y		0	0		NA	NA	NA	NA		NA	NA		0	0	0	0	0	0	0	0	0	0	0	0	0	0	1	0	0	2			-0.267261	-0.267261	-0.267261	-0.267261	-0.267261	-0.267261	-0.267261	-0.267261	-0.267261	-0.267261	-0.267261	-0.267261	-0.267261	-0.267261
OG0019324	N	N	Y		0	0		NA	NA	NA	NA		NA	NA		0	0	0	0	0	0	0	0	0	0	0	0	0	0	0	0	0	3			#NUM!	#NUM!	#NUM!	#NUM!	#NUM!	#NUM!	#NUM!	#NUM!	#NUM!	#NUM!	#NUM!	#NUM!	#NUM!	#NUM!
OG0019325	N	N	Y		0	0		NA	NA	NA	NA		NA	NA		0	0	0	0	0	0	0	0	0	0	0	0	0	0	0	0	0	3			#NUM!	#NUM!	#NUM!	#NUM!	#NUM!	#NUM!	#NUM!	#NUM!	#NUM!	#NUM!	#NUM!	#NUM!	#NUM!	#NUM!
OG0019326	N	N	Y		0	0		NA	NA	NA	NA		NA	NA		0	0	0	0	0	0	0	0	0	0	0	0	0	0	0	0	0	3			#NUM!	#NUM!	#NUM!	#NUM!	#NUM!	#NUM!	#NUM!	#NUM!	#NUM!	#NUM!	#NUM!	#NUM!	#NUM!	#NUM!
OG0019327	N	N	Y		0	0		NA	NA	NA	NA		NA	NA		0	0	0	0	0	0	0	0	0	0	0	0	0	0	1	0	0	2			-0.267261	-0.267261	-0.267261	-0.267261	-0.267261	-0.267261	-0.267261	-0.267261	-0.267261	-0.267261	-0.267261	-0.267261	-0.267261	-0.267261
OG0019328	N	N	Y		0	0		NA	NA	NA	NA		NA	NA		0	0	0	0	0	0	0	0	0	0	0	0	0	0	0	0	0	3			#NUM!	#NUM!	#NUM!	#NUM!	#NUM!	#NUM!	#NUM!	#NUM!	#NUM!	#NUM!	#NUM!	#NUM!	#NUM!	#NUM!
OG0019329	N	N	Y		0	0		NA	NA	NA	NA		NA	NA		0	0	0	0	0	0	0	0	0	0	0	0	0	0	0	0	0	3			#NUM!	#NUM!	#NUM!	#NUM!	#NUM!	#NUM!	#NUM!	#NUM!	#NUM!	#NUM!	#NUM!	#NUM!	#NUM!	#NUM!
OG0019330	N	N	Y		0	0		NA	NA	NA	NA		NA	NA		0	0	0	0	0	0	0	0	0	0	0	0	0	0	0	0	0	3			#NUM!	#NUM!	#NUM!	#NUM!	#NUM!	#NUM!	#NUM!	#NUM!	#NUM!	#NUM!	#NUM!	#NUM!	#NUM!	#NUM!
OG0019331	N	N	Y		0	0		NA	NA	NA	NA		NA	NA		0	0	0	0	0	0	0	0	0	0	0	0	0	0	0	0	0	3			#NUM!	#NUM!	#NUM!	#NUM!	#NUM!	#NUM!	#NUM!	#NUM!	#NUM!	#NUM!	#NUM!	#NUM!	#NUM!	#NUM!
OG0019332	N	N	Y		0	0		NA	NA	NA	NA		NA	NA		0	0	0	0	0	0	0	0	0	0	0	0	0	0	0	0	0	3			#NUM!	#NUM!	#NUM!	#NUM!	#NUM!	#NUM!	#NUM!	#NUM!	#NUM!	#NUM!	#NUM!	#NUM!	#NUM!	#NUM!
OG0019333	N	N	Y		0	0		NA	NA	NA	NA		NA	NA		0	0	0	0	0	0	0	0	0	0	0	0	0	0	1	0	0	2			-0.267261	-0.267261	-0.267261	-0.267261	-0.267261	-0.267261	-0.267261	-0.267261	-0.267261	-0.267261	-0.267261	-0.267261	-0.267261	-0.267261
OG0019334	N	N	Y		0	0		NA	NA	NA	NA		NA	NA		0	0	0	0	0	0	0	0	0	0	0	0	0	0	1	0	0	2			-0.267261	-0.267261	-0.267261	-0.267261	-0.267261	-0.267261	-0.267261	-0.267261	-0.267261	-0.267261	-0.267261	-0.267261	-0.267261	-0.267261
OG0019335	N	N	Y		0	0		NA	NA	NA	NA		NA	NA		0	0	0	0	0	0	0	0	0	0	0	0	0	0	0	0	0	3			#NUM!	#NUM!	#NUM!	#NUM!	#NUM!	#NUM!	#NUM!	#NUM!	#NUM!	#NUM!	#NUM!	#NUM!	#NUM!	#NUM!
OG0019336	N	N	Y		0	0		NA	NA	NA	NA		NA	NA		0	0	0	0	0	0	0	0	0	0	0	0	0	0	1	0	0	2			-0.267261	-0.267261	-0.267261	-0.267261	-0.267261	-0.267261	-0.267261	-0.267261	-0.267261	-0.267261	-0.267261	-0.267261	-0.267261	-0.267261
OG0019337	N	N	Y		0	0		NA	NA	NA	NA		NA	NA		0	0	0	0	0	0	0	0	0	0	0	0	0	0	0	0	0	3			#NUM!	#NUM!	#NUM!	#NUM!	#NUM!	#NUM!	#NUM!	#NUM!	#NUM!	#NUM!	#NUM!	#NUM!	#NUM!	#NUM!
OG0019338	N	N	Y		0	0		NA	NA	NA	NA		NA	NA		0	0	0	0	0	0	0	0	0	0	0	0	0	0	1	0	0	2			-0.267261	-0.267261	-0.267261	-0.267261	-0.267261	-0.267261	-0.267261	-0.267261	-0.267261	-0.267261	-0.267261	-0.267261	-0.267261	-0.267261
OG0019339	N	N	Y		0	0		NA	NA	NA	NA		NA	NA		0	0	0	0	0	0	0	0	0	0	0	0	0	0	1	0	0	2			-0.267261	-0.267261	-0.267261	-0.267261	-0.267261	-0.267261	-0.267261	-0.267261	-0.267261	-0.267261	-0.267261	-0.267261	-0.267261	-0.267261
OG0019340	N	N	Y		0	0		NA	NA	NA	NA		NA	NA		0	0	0	0	0	0	0	0	0	0	0	0	0	0	1	0	0	2			-0.267261	-0.267261	-0.267261	-0.267261	-0.267261	-0.267261	-0.267261	-0.267261	-0.267261	-0.267261	-0.267261	-0.267261	-0.267261	-0.267261
OG0019341	N	N	Y		0	0		NA	NA	NA	NA		NA	NA		0	0	0	0	0	0	0	0	0	0	0	0	0	0	0	0	0	3			#NUM!	#NUM!	#NUM!	#NUM!	#NUM!	#NUM!	#NUM!	#NUM!	#NUM!	#NUM!	#NUM!	#NUM!	#NUM!	#NUM!
OG0019342	N	N	Y		0	0		NA	NA	NA	NA		NA	NA		0	0	0	0	0	0	0	0	0	0	0	0	0	0	0	0	0	3			#NUM!	#NUM!	#NUM!	#NUM!	#NUM!	#NUM!	#NUM!	#NUM!	#NUM!	#NUM!	#NUM!	#NUM!	#NUM!	#NUM!
OG0019343	N	N	Y		0	0		NA	NA	NA	NA		NA	NA		0	0	0	0	0	0	0	0	0	0	0	0	0	0	2	0	0	1			-0.267261	-0.267261	-0.267261	-0.267261	-0.267261	-0.267261	-0.267261	-0.267261	-0.267261	-0.267261	-0.267261	-0.267261	-0.267261	-0.267261
OG0019344	N	N	Y		0	0		NA	NA	NA	NA		NA	NA		0	0	0	0	0	0	0	0	0	0	0	0	0	0	0	0	0	3			#NUM!	#NUM!	#NUM!	#NUM!	#NUM!	#NUM!	#NUM!	#NUM!	#NUM!	#NUM!	#NUM!	#NUM!	#NUM!	#NUM!
OG0019345	N	N	Y		0	0		NA	NA	NA	NA		NA	NA		0	0	0	0	0	0	0	0	0	0	0	0	0	0	1	0	0	2			-0.267261	-0.267261	-0.267261	-0.267261	-0.267261	-0.267261	-0.267261	-0.267261	-0.267261	-0.267261	-0.267261	-0.267261	-0.267261	-0.267261
OG0019346	N	N	Y		0	0		NA	NA	NA	NA		NA	NA		0	0	0	0	0	0	0	0	0	0	0	0	0	0	0	0	0	3			#NUM!	#NUM!	#NUM!	#NUM!	#NUM!	#NUM!	#NUM!	#NUM!	#NUM!	#NUM!	#NUM!	#NUM!	#NUM!	#NUM!
OG0019347	N	N	Y		0	0		NA	NA	NA	NA		NA	NA		0	0	0	0	0	0	0	0	0	0	0	0	0	0	0	0	0	3			#NUM!	#NUM!	#NUM!	#NUM!	#NUM!	#NUM!	#NUM!	#NUM!	#NUM!	#NUM!	#NUM!	#NUM!	#NUM!	#NUM!
OG0019348	N	N	Y		0	0		NA	NA	NA	NA		NA	NA		0	0	0	0	0	0	0	0	0	0	0	0	0	0	1	0	0	2			-0.267261	-0.267261	-0.267261	-0.267261	-0.267261	-0.267261	-0.267261	-0.267261	-0.267261	-0.267261	-0.267261	-0.267261	-0.267261	-0.267261
OG0019349	N	N	Y		0	0		NA	NA	NA	NA		NA	NA		0	0	0	0	0	0	0	0	0	0	0	0	0	0	0	0	0	3			#NUM!	#NUM!	#NUM!	#NUM!	#NUM!	#NUM!	#NUM!	#NUM!	#NUM!	#NUM!	#NUM!	#NUM!	#NUM!	#NUM!
OG0019350	N	N	Y		0	0		NA	NA	NA	NA		NA	NA		0	0	0	0	0	0	0	0	0	0	0	0	0	0	1	0	0	2			-0.267261	-0.267261	-0.267261	-0.267261	-0.267261	-0.267261	-0.267261	-0.267261	-0.267261	-0.267261	-0.267261	-0.267261	-0.267261	-0.267261
OG0019351	N	N	Y		0	0		NA	NA	NA	NA		NA	NA		0	0	0	0	0	0	0	0	0	0	0	0	0	0	0	0	0	3			#NUM!	#NUM!	#NUM!	#NUM!	#NUM!	#NUM!	#NUM!	#NUM!	#NUM!	#NUM!	#NUM!	#NUM!	#NUM!	#NUM!
OG0019352	N	N	Y		0	0		NA	NA	NA	NA		NA	NA		0	0	0	0	0	0	0	2	0	0	0	0	0	0	0	0	0	1			-0.267261	-0.267261	-0.267261	-0.267261	-0.267261	-0.267261	-0.267261	3.74166	-0.267261	-0.267261	-0.267261	-0.267261	-0.267261	-0.267261
OG0019353	N	N	Y		0	0		NA	NA	NA	NA		NA	NA		0	0	0	0	0	0	0	0	0	0	0	0	0	0	0	0	0	3			#NUM!	#NUM!	#NUM!	#NUM!	#NUM!	#NUM!	#NUM!	#NUM!	#NUM!	#NUM!	#NUM!	#NUM!	#NUM!	#NUM!
OG0019354	N	N	Y		0	0		NA	NA	NA	NA		NA	NA		0	0	0	0	0	0	0	0	0	0	0	0	0	0	1	0	0	2			-0.267261	-0.267261	-0.267261	-0.267261	-0.267261	-0.267261	-0.267261	-0.267261	-0.267261	-0.267261	-0.267261	-0.267261	-0.267261	-0.267261
OG0019355	N	N	Y		0	0		NA	NA	NA	NA		NA	NA		0	0	0	0	0	0	0	0	0	0	0	0	0	0	1	0	0	2			-0.267261	-0.267261	-0.267261	-0.267261	-0.267261	-0.267261	-0.267261	-0.267261	-0.267261	-0.267261	-0.267261	-0.267261	-0.267261	-0.267261
OG0019356	N	N	Y		0	0		NA	NA	NA	NA		NA	NA		0	0	0	0	0	0	0	0	0	0	0	0	0	0	1	0	0	2			-0.267261	-0.267261	-0.267261	-0.267261	-0.267261	-0.267261	-0.267261	-0.267261	-0.267261	-0.267261	-0.267261	-0.267261	-0.267261	-0.267261
OG0019357	N	N	Y		0	0		NA	NA	NA	NA		NA	NA		0	0	0	0	0	0	0	0	0	0	0	0	0	0	1	0	0	2			-0.267261	-0.267261	-0.267261	-0.267261	-0.267261	-0.267261	-0.267261	-0.267261	-0.267261	-0.267261	-0.267261	-0.267261	-0.267261	-0.267261
OG0019358	N	N	Y		0	0		NA	NA	NA	NA		NA	NA		0	0	0	0	0	0	0	0	0	0	0	0	0	0	1	0	0	2			-0.267261	-0.267261	-0.267261	-0.267261	-0.267261	-0.267261	-0.267261	-0.267261	-0.267261	-0.267261	-0.267261	-0.267261	-0.267261	-0.267261
OG0019359	N	N	Y		0	0		NA	NA	NA	NA		NA	NA		0	0	0	0	0	0	0	0	0	0	0	0	0	0	1	0	0	2			-0.267261	-0.267261	-0.267261	-0.267261	-0.267261	-0.267261	-0.267261	-0.267261	-0.267261	-0.267261	-0.267261	-0.267261	-0.267261	-0.267261
OG0019360	N	N	Y		0	0		NA	NA	NA	NA		NA	NA		0	0	0	0	0	0	0	0	0	0	0	0	0	0	1	0	0	2			-0.267261	-0.267261	-0.267261	-0.267261	-0.267261	-0.267261	-0.267261	-0.267261	-0.267261	-0.267261	-0.267261	-0.267261	-0.267261	-0.267261
OG0019361	N	N	Y		0	0		NA	NA	NA	NA		NA	NA		0	0	0	0	0	0	0	0	0	0	0	0	0	0	1	0	0	2			-0.267261	-0.267261	-0.267261	-0.267261	-0.267261	-0.267261	-0.267261	-0.267261	-0.267261	-0.267261	-0.267261	-0.267261	-0.267261	-0.267261
OG0019362	N	N	Y		0	0		NA	NA	NA	NA		NA	NA		0	0	0	0	0	0	0	0	0	0	0	0	0	0	1	0	0	2			-0.267261	-0.267261	-0.267261	-0.267261	-0.267261	-0.267261	-0.267261	-0.267261	-0.267261	-0.267261	-0.267261	-0.267261	-0.267261	-0.267261
OG0019363	N	N	Y		0	0		NA	NA	NA	NA		NA	NA		0	0	0	0	0	0	0	0	0	0	0	0	0	0	0	0	0	3			#NUM!	#NUM!	#NUM!	#NUM!	#NUM!	#NUM!	#NUM!	#NUM!	#NUM!	#NUM!	#NUM!	#NUM!	#NUM!	#NUM!
OG0019364	N	N	Y		0	0		NA	NA	NA	NA		NA	NA		0	0	0	0	0	0	0	0	0	0	0	0	0	0	1	0	0	2			-0.267261	-0.267261	-0.267261	-0.267261	-0.267261	-0.267261	-0.267261	-0.267261	-0.267261	-0.267261	-0.267261	-0.267261	-0.267261	-0.267261
OG0019365	N	N	Y		0	0		NA	NA	NA	NA		NA	NA		0	0	0	0	0	0	0	0	0	0	0	0	0	0	1	0	0	2			-0.267261	-0.267261	-0.267261	-0.267261	-0.267261	-0.267261	-0.267261	-0.267261	-0.267261	-0.267261	-0.267261	-0.267261	-0.267261	-0.267261
OG0019366	N	N	Y		0	0		NA	NA	NA	NA		NA	NA		0	0	0	0	0	0	0	0	0	0	0	0	0	0	1	0	0	2			-0.267261	-0.267261	-0.267261	-0.267261	-0.267261	-0.267261	-0.267261	-0.267261	-0.267261	-0.267261	-0.267261	-0.267261	-0.267261	-0.267261
OG0019367	N	N	Y		0	0		NA	NA	NA	NA		NA	NA		0	0	0	0	0	0	0	0	0	0	0	0	0	0	1	0	0	2			-0.267261	-0.267261	-0.267261	-0.267261	-0.267261	-0.267261	-0.267261	-0.267261	-0.267261	-0.267261	-0.267261	-0.267261	-0.267261	-0.267261
OG0019368	N	N	Y		0	0		NA	NA	NA	NA		NA	NA		0	0	0	0	0	0	0	0	0	0	0	0	0	0	0	0	0	3			#NUM!	#NUM!	#NUM!	#NUM!	#NUM!	#NUM!	#NUM!	#NUM!	#NUM!	#NUM!	#NUM!	#NUM!	#NUM!	#NUM!
OG0019369	N	N	Y		0	0		NA	NA	NA	NA		NA	NA		0	0	0	0	0	0	0	0	0	0	0	0	0	0	2	0	0	1			-0.267261	-0.267261	-0.267261	-0.267261	-0.267261	-0.267261	-0.267261	-0.267261	-0.267261	-0.267261	-0.267261	-0.267261	-0.267261	-0.267261
OG0019370	N	N	Y		0	0		NA	NA	NA	NA		NA	NA		0	0	0	0	0	0	0	0	0	0	0	0	0	0	1	0	0	2			-0.267261	-0.267261	-0.267261	-0.267261	-0.267261	-0.267261	-0.267261	-0.267261	-0.267261	-0.267261	-0.267261	-0.267261	-0.267261	-0.267261
OG0019371	N	N	Y		0	0		NA	NA	NA	NA		NA	NA		0	0	0	0	0	0	0	0	0	0	0	0	0	0	1	0	0	2			-0.267261	-0.267261	-0.267261	-0.267261	-0.267261	-0.267261	-0.267261	-0.267261	-0.267261	-0.267261	-0.267261	-0.267261	-0.267261	-0.267261
OG0019372	N	N	Y		0	0		NA	NA	NA	NA		NA	NA		0	0	0	0	0	0	0	0	0	0	0	0	0	0	0	0	0	3			#NUM!	#NUM!	#NUM!	#NUM!	#NUM!	#NUM!	#NUM!	#NUM!	#NUM!	#NUM!	#NUM!	#NUM!	#NUM!	#NUM!
OG0019373	N	N	Y		0	0		NA	NA	NA	NA		NA	NA		0	0	0	0	0	0	0	0	0	0	0	0	0	0	1	0	0	2			-0.267261	-0.267261	-0.267261	-0.267261	-0.267261	-0.267261	-0.267261	-0.267261	-0.267261	-0.267261	-0.267261	-0.267261	-0.267261	-0.267261
OG0019374	N	N	Y		0	0		NA	NA	NA	NA		NA	NA		0	0	0	0	0	0	0	0	0	0	0	0	0	0	1	0	0	2			-0.267261	-0.267261	-0.267261	-0.267261	-0.267261	-0.267261	-0.267261	-0.267261	-0.267261	-0.267261	-0.267261	-0.267261	-0.267261	-0.267261
OG0019375	N	N	Y		0	0		NA	NA	NA	NA		NA	NA		0	0	0	0	0	0	0	0	0	0	0	0	0	0	0	0	0	3			#NUM!	#NUM!	#NUM!	#NUM!	#NUM!	#NUM!	#NUM!	#NUM!	#NUM!	#NUM!	#NUM!	#NUM!	#NUM!	#NUM!
OG0019376	N	N	Y		0	0		NA	NA	NA	NA		NA	NA		0	0	0	0	0	0	0	0	0	0	0	0	0	0	2	0	0	1			-0.267261	-0.267261	-0.267261	-0.267261	-0.267261	-0.267261	-0.267261	-0.267261	-0.267261	-0.267261	-0.267261	-0.267261	-0.267261	-0.267261
OG0019377	N	N	Y		0	0		NA	NA	NA	NA		NA	NA		0	0	0	0	0	0	0	0	0	0	0	0	0	0	1	0	0	2			-0.267261	-0.267261	-0.267261	-0.267261	-0.267261	-0.267261	-0.267261	-0.267261	-0.267261	-0.267261	-0.267261	-0.267261	-0.267261	-0.267261
OG0019378	N	N	Y		0	0		NA	NA	NA	NA		NA	NA		0	0	0	0	0	0	0	3	0	0	0	0	0	0	0	0	0	0			-0.267261	-0.267261	-0.267261	-0.267261	-0.267261	-0.267261	-0.267261	3.74166	-0.267261	-0.267261	-0.267261	-0.267261	-0.267261	-0.267261
OG0019379	N	N	Y		0	0		NA	NA	NA	NA		NA	NA		0	0	0	0	0	0	0	3	0	0	0	0	0	0	0	0	0	0			-0.267261	-0.267261	-0.267261	-0.267261	-0.267261	-0.267261	-0.267261	3.74166	-0.267261	-0.267261	-0.267261	-0.267261	-0.267261	-0.267261
OG0019380	N	N	Y		0	0		NA	NA	NA	NA		NA	NA		0	0	0	0	0	0	0	3	0	0	0	0	0	0	0	0	0	0			-0.267261	-0.267261	-0.267261	-0.267261	-0.267261	-0.267261	-0.267261	3.74166	-0.267261	-0.267261	-0.267261	-0.267261	-0.267261	-0.267261
OG0019381	N	N	Y		0	0		NA	NA	NA	NA		NA	NA		0	0	0	0	0	0	0	3	0	0	0	0	0	0	0	0	0	0			-0.267261	-0.267261	-0.267261	-0.267261	-0.267261	-0.267261	-0.267261	3.74166	-0.267261	-0.267261	-0.267261	-0.267261	-0.267261	-0.267261
OG0019382	N	N	Y		0	0		NA	NA	NA	NA		NA	NA		0	0	0	0	0	0	0	3	0	0	0	0	0	0	0	0	0	0			-0.267261	-0.267261	-0.267261	-0.267261	-0.267261	-0.267261	-0.267261	3.74166	-0.267261	-0.267261	-0.267261	-0.267261	-0.267261	-0.267261
OG0019383	N	N	Y		0	0		NA	NA	NA	NA		NA	NA		0	0	0	0	0	0	0	3	0	0	0	0	0	0	0	0	0	0			-0.267261	-0.267261	-0.267261	-0.267261	-0.267261	-0.267261	-0.267261	3.74166	-0.267261	-0.267261	-0.267261	-0.267261	-0.267261	-0.267261
OG0019384	N	N	Y		0	0		NA	NA	NA	NA		NA	NA		0	0	0	0	0	0	0	3	0	0	0	0	0	0	0	0	0	0			-0.267261	-0.267261	-0.267261	-0.267261	-0.267261	-0.267261	-0.267261	3.74166	-0.267261	-0.267261	-0.267261	-0.267261	-0.267261	-0.267261
OG0019385	N	N	Y		0	0		NA	NA	NA	NA		NA	NA		0	0	0	0	0	0	0	3	0	0	0	0	0	0	0	0	0	0			-0.267261	-0.267261	-0.267261	-0.267261	-0.267261	-0.267261	-0.267261	3.74166	-0.267261	-0.267261	-0.267261	-0.267261	-0.267261	-0.267261
OG0019386	N	N	Y		0	0		NA	NA	NA	NA		NA	NA		0	0	0	0	0	0	0	3	0	0	0	0	0	0	0	0	0	0			-0.267261	-0.267261	-0.267261	-0.267261	-0.267261	-0.267261	-0.267261	3.74166	-0.267261	-0.267261	-0.267261	-0.267261	-0.267261	-0.267261
OG0019387	N	N	Y		0	0		NA	NA	NA	NA		NA	NA		0	0	0	0	0	0	0	3	0	0	0	0	0	0	0	0	0	0			-0.267261	-0.267261	-0.267261	-0.267261	-0.267261	-0.267261	-0.267261	3.74166	-0.267261	-0.267261	-0.267261	-0.267261	-0.267261	-0.267261
OG0019388	N	N	Y		0	0		NA	NA	NA	NA		NA	NA		0	0	0	0	0	0	0	3	0	0	0	0	0	0	0	0	0	0			-0.267261	-0.267261	-0.267261	-0.267261	-0.267261	-0.267261	-0.267261	3.74166	-0.267261	-0.267261	-0.267261	-0.267261	-0.267261	-0.267261
OG0019390	N	N	Y		0	0		NA	NA	NA	NA		NA	NA		0	0	0	0	0	0	0	0	0	0	0	0	2	0	0	0	0	0			-0.267261	-0.267261	-0.267261	-0.267261	-0.267261	-0.267261	-0.267261	-0.267261	-0.267261	-0.267261	-0.267261	-0.267261	3.74166	-0.267261
OG0019402	N	N	Y		0	0		NA	NA	NA	NA		NA	NA		0	0	0	0	0	0	0	0	0	0	0	0	2	0	0	0	0	0			-0.267261	-0.267261	-0.267261	-0.267261	-0.267261	-0.267261	-0.267261	-0.267261	-0.267261	-0.267261	-0.267261	-0.267261	3.74166	-0.267261
OG0019410	N	N	Y		0	0		NA	NA	NA	NA		NA	NA		0	0	0	0	0	0	0	0	0	0	0	0	2	0	0	0	0	0			-0.267261	-0.267261	-0.267261	-0.267261	-0.267261	-0.267261	-0.267261	-0.267261	-0.267261	-0.267261	-0.267261	-0.267261	3.74166	-0.267261
OG0019412	N	N	Y		0	0		NA	NA	NA	NA		NA	NA		0	0	0	0	0	0	0	0	0	0	0	0	2	0	0	0	0	0			-0.267261	-0.267261	-0.267261	-0.267261	-0.267261	-0.267261	-0.267261	-0.267261	-0.267261	-0.267261	-0.267261	-0.267261	3.74166	-0.267261
OG0019413	N	N	Y		0	0		NA	NA	NA	NA		NA	NA		0	0	0	0	0	0	0	0	0	0	0	0	2	0	0	0	0	0			-0.267261	-0.267261	-0.267261	-0.267261	-0.267261	-0.267261	-0.267261	-0.267261	-0.267261	-0.267261	-0.267261	-0.267261	3.74166	-0.267261
OG0019415	N	N	Y		0	0		NA	NA	NA	NA		NA	NA		0	0	0	0	0	0	0	0	0	0	0	0	2	0	0	0	0	0			-0.267261	-0.267261	-0.267261	-0.267261	-0.267261	-0.267261	-0.267261	-0.267261	-0.267261	-0.267261	-0.267261	-0.267261	3.74166	-0.267261
OG0019417	N	N	Y		0	0		NA	NA	NA	NA		NA	NA		0	0	0	0	0	0	0	0	0	0	0	0	2	0	0	0	0	0			-0.267261	-0.267261	-0.267261	-0.267261	-0.267261	-0.267261	-0.267261	-0.267261	-0.267261	-0.267261	-0.267261	-0.267261	3.74166	-0.267261
OG0019420	N	N	Y		0	0		NA	NA	NA	NA		NA	NA		0	0	0	0	0	0	0	0	0	0	0	0	2	0	0	0	0	0			-0.267261	-0.267261	-0.267261	-0.267261	-0.267261	-0.267261	-0.267261	-0.267261	-0.267261	-0.267261	-0.267261	-0.267261	3.74166	-0.267261
OG0019426	N	N	Y		0	0		NA	NA	NA	NA		NA	NA		0	0	0	0	0	0	0	0	0	0	0	0	2	0	0	0	0	0			-0.267261	-0.267261	-0.267261	-0.267261	-0.267261	-0.267261	-0.267261	-0.267261	-0.267261	-0.267261	-0.267261	-0.267261	3.74166	-0.267261
OG0019427	N	N	Y		0	0		NA	NA	NA	NA		NA	NA		0	0	0	0	0	0	0	0	0	0	0	0	2	0	0	0	0	0			-0.267261	-0.267261	-0.267261	-0.267261	-0.267261	-0.267261	-0.267261	-0.267261	-0.267261	-0.267261	-0.267261	-0.267261	3.74166	-0.267261
OG0019428	N	N	Y		0	0		NA	NA	NA	NA		NA	NA		0	0	0	0	0	0	0	0	0	0	0	0	2	0	0	0	0	0			-0.267261	-0.267261	-0.267261	-0.267261	-0.267261	-0.267261	-0.267261	-0.267261	-0.267261	-0.267261	-0.267261	-0.267261	3.74166	-0.267261
OG0019432	N	N	Y		0	0		NA	NA	NA	NA		NA	NA		0	0	0	0	0	0	0	0	0	0	0	0	2	0	0	0	0	0			-0.267261	-0.267261	-0.267261	-0.267261	-0.267261	-0.267261	-0.267261	-0.267261	-0.267261	-0.267261	-0.267261	-0.267261	3.74166	-0.267261
OG0019435	N	N	Y		0	0		NA	NA	NA	NA		NA	NA		0	0	0	0	0	0	0	0	0	0	0	0	2	0	0	0	0	0			-0.267261	-0.267261	-0.267261	-0.267261	-0.267261	-0.267261	-0.267261	-0.267261	-0.267261	-0.267261	-0.267261	-0.267261	3.74166	-0.267261
OG0019436	N	N	Y		0	0		NA	NA	NA	NA		NA	NA		0	0	0	0	0	0	0	0	0	0	0	0	2	0	0	0	0	0			-0.267261	-0.267261	-0.267261	-0.267261	-0.267261	-0.267261	-0.267261	-0.267261	-0.267261	-0.267261	-0.267261	-0.267261	3.74166	-0.267261
OG0019437	N	N	Y		0	0		NA	NA	NA	NA		NA	NA		0	0	0	0	0	0	0	0	0	0	0	0	2	0	0	0	0	0			-0.267261	-0.267261	-0.267261	-0.267261	-0.267261	-0.267261	-0.267261	-0.267261	-0.267261	-0.267261	-0.267261	-0.267261	3.74166	-0.267261
OG0019441	N	N	Y		0	0		NA	NA	NA	NA		NA	NA		0	0	0	0	0	0	0	0	0	0	0	0	2	0	0	0	0	0			-0.267261	-0.267261	-0.267261	-0.267261	-0.267261	-0.267261	-0.267261	-0.267261	-0.267261	-0.267261	-0.267261	-0.267261	3.74166	-0.267261
OG0019445	N	N	Y		0	0		NA	NA	NA	NA		NA	NA		0	0	0	0	0	0	0	0	0	0	0	0	2	0	0	0	0	0			-0.267261	-0.267261	-0.267261	-0.267261	-0.267261	-0.267261	-0.267261	-0.267261	-0.267261	-0.267261	-0.267261	-0.267261	3.74166	-0.267261
OG0019446	N	N	Y		0	0		NA	NA	NA	NA		NA	NA		0	0	0	0	0	0	0	0	0	0	0	0	2	0	0	0	0	0			-0.267261	-0.267261	-0.267261	-0.267261	-0.267261	-0.267261	-0.267261	-0.267261	-0.267261	-0.267261	-0.267261	-0.267261	3.74166	-0.267261
OG0019448	N	N	Y		0	0		NA	NA	NA	NA		NA	NA		0	0	0	0	0	0	0	0	0	0	0	0	2	0	0	0	0	0			-0.267261	-0.267261	-0.267261	-0.267261	-0.267261	-0.267261	-0.267261	-0.267261	-0.267261	-0.267261	-0.267261	-0.267261	3.74166	-0.267261
OG0019449	N	N	Y		0	0		NA	NA	NA	NA		NA	NA		0	0	0	0	0	0	0	0	0	0	0	0	2	0	0	0	0	0			-0.267261	-0.267261	-0.267261	-0.267261	-0.267261	-0.267261	-0.267261	-0.267261	-0.267261	-0.267261	-0.267261	-0.267261	3.74166	-0.267261
OG0019456	N	N	Y		0	0		NA	NA	NA	NA		NA	NA		0	0	0	0	0	0	0	0	0	0	0	0	2	0	0	0	0	0			-0.267261	-0.267261	-0.267261	-0.267261	-0.267261	-0.267261	-0.267261	-0.267261	-0.267261	-0.267261	-0.267261	-0.267261	3.74166	-0.267261
OG0019461	N	N	Y		0	0		NA	NA	NA	NA		NA	NA		0	0	0	0	0	0	0	0	0	0	0	0	2	0	0	0	0	0			-0.267261	-0.267261	-0.267261	-0.267261	-0.267261	-0.267261	-0.267261	-0.267261	-0.267261	-0.267261	-0.267261	-0.267261	3.74166	-0.267261
OG0019468	N	N	Y		0	0		NA	NA	NA	NA		NA	NA		0	0	0	0	0	0	0	0	0	0	0	0	2	0	0	0	0	0			-0.267261	-0.267261	-0.267261	-0.267261	-0.267261	-0.267261	-0.267261	-0.267261	-0.267261	-0.267261	-0.267261	-0.267261	3.74166	-0.267261
OG0019472	N	N	Y		0	0		NA	NA	NA	NA		NA	NA		0	0	0	0	0	0	0	0	0	0	0	0	2	0	0	0	0	0			-0.267261	-0.267261	-0.267261	-0.267261	-0.267261	-0.267261	-0.267261	-0.267261	-0.267261	-0.267261	-0.267261	-0.267261	3.74166	-0.267261
OG0019473	N	N	Y		0	0		NA	NA	NA	NA		NA	NA		0	0	0	0	0	0	0	0	0	0	0	0	2	0	0	0	0	0			-0.267261	-0.267261	-0.267261	-0.267261	-0.267261	-0.267261	-0.267261	-0.267261	-0.267261	-0.267261	-0.267261	-0.267261	3.74166	-0.267261
OG0019474	N	N	Y		0	0		NA	NA	NA	NA		NA	NA		0	0	0	0	0	0	0	0	0	0	0	0	2	0	0	0	0	0			-0.267261	-0.267261	-0.267261	-0.267261	-0.267261	-0.267261	-0.267261	-0.267261	-0.267261	-0.267261	-0.267261	-0.267261	3.74166	-0.267261
OG0019478	N	N	Y		0	0		NA	NA	NA	NA		NA	NA		0	0	0	0	0	0	0	0	0	0	0	0	2	0	0	0	0	0			-0.267261	-0.267261	-0.267261	-0.267261	-0.267261	-0.267261	-0.267261	-0.267261	-0.267261	-0.267261	-0.267261	-0.267261	3.74166	-0.267261
OG0019486	N	N	Y		0	0		NA	NA	NA	NA		NA	NA		0	0	0	0	0	0	0	0	0	0	0	0	2	0	0	0	0	0			-0.267261	-0.267261	-0.267261	-0.267261	-0.267261	-0.267261	-0.267261	-0.267261	-0.267261	-0.267261	-0.267261	-0.267261	3.74166	-0.267261
OG0019491	N	N	Y		0	0		NA	NA	NA	NA		NA	NA		0	0	0	0	0	0	0	0	0	0	0	0	2	0	0	0	0	0			-0.267261	-0.267261	-0.267261	-0.267261	-0.267261	-0.267261	-0.267261	-0.267261	-0.267261	-0.267261	-0.267261	-0.267261	3.74166	-0.267261
OG0019492	N	N	Y		0	0		NA	NA	NA	NA		NA	NA		0	0	0	0	0	0	0	0	0	0	0	0	2	0	0	0	0	0			-0.267261	-0.267261	-0.267261	-0.267261	-0.267261	-0.267261	-0.267261	-0.267261	-0.267261	-0.267261	-0.267261	-0.267261	3.74166	-0.267261
OG0019502	N	N	Y		0	0		NA	NA	NA	NA		NA	NA		0	0	0	0	0	0	0	0	0	0	0	0	2	0	0	0	0	0			-0.267261	-0.267261	-0.267261	-0.267261	-0.267261	-0.267261	-0.267261	-0.267261	-0.267261	-0.267261	-0.267261	-0.267261	3.74166	-0.267261
OG0019506	N	N	Y		0	0		NA	NA	NA	NA		NA	NA		0	0	0	0	0	0	0	0	0	0	0	0	2	0	0	0	0	0			-0.267261	-0.267261	-0.267261	-0.267261	-0.267261	-0.267261	-0.267261	-0.267261	-0.267261	-0.267261	-0.267261	-0.267261	3.74166	-0.267261
OG0019507	N	N	Y		0	0		NA	NA	NA	NA		NA	NA		0	0	0	0	0	0	0	0	0	0	0	0	2	0	0	0	0	0			-0.267261	-0.267261	-0.267261	-0.267261	-0.267261	-0.267261	-0.267261	-0.267261	-0.267261	-0.267261	-0.267261	-0.267261	3.74166	-0.267261
OG0019509	N	N	Y		0	0		NA	NA	NA	NA		NA	NA		0	0	0	0	0	0	0	0	0	0	0	0	2	0	0	0	0	0			-0.267261	-0.267261	-0.267261	-0.267261	-0.267261	-0.267261	-0.267261	-0.267261	-0.267261	-0.267261	-0.267261	-0.267261	3.74166	-0.267261
OG0019526	N	N	Y		0	0		NA	NA	NA	NA		NA	NA		0	0	0	0	0	0	0	0	0	0	0	0	2	0	0	0	0	0			-0.267261	-0.267261	-0.267261	-0.267261	-0.267261	-0.267261	-0.267261	-0.267261	-0.267261	-0.267261	-0.267261	-0.267261	3.74166	-0.267261
OG0019529	N	N	Y		0	0		NA	NA	NA	NA		NA	NA		0	0	0	0	0	0	0	0	0	0	0	0	2	0	0	0	0	0			-0.267261	-0.267261	-0.267261	-0.267261	-0.267261	-0.267261	-0.267261	-0.267261	-0.267261	-0.267261	-0.267261	-0.267261	3.74166	-0.267261
OG0019530	N	N	Y		0	0		NA	NA	NA	NA		NA	NA		0	0	0	0	0	0	0	0	0	0	0	0	2	0	0	0	0	0			-0.267261	-0.267261	-0.267261	-0.267261	-0.267261	-0.267261	-0.267261	-0.267261	-0.267261	-0.267261	-0.267261	-0.267261	3.74166	-0.267261
OG0019555	N	N	Y		0	0		NA	NA	NA	NA		NA	NA		0	0	0	0	0	0	0	0	0	0	0	0	1	0	0	1	0	0			-0.267261	-0.267261	-0.267261	-0.267261	-0.267261	-0.267261	-0.267261	-0.267261	-0.267261	-0.267261	-0.267261	-0.267261	3.74166	-0.267261
OG0019557	N	N	Y		0	0		NA	NA	NA	NA		NA	NA		0	0	0	0	0	0	0	0	0	0	0	0	2	0	0	0	0	0			-0.267261	-0.267261	-0.267261	-0.267261	-0.267261	-0.267261	-0.267261	-0.267261	-0.267261	-0.267261	-0.267261	-0.267261	3.74166	-0.267261
OG0019568	N	N	Y		0	0		NA	NA	NA	NA		NA	NA		0	0	0	0	0	0	0	0	0	0	0	0	2	0	0	0	0	0			-0.267261	-0.267261	-0.267261	-0.267261	-0.267261	-0.267261	-0.267261	-0.267261	-0.267261	-0.267261	-0.267261	-0.267261	3.74166	-0.267261
OG0019571	N	N	Y		0	0		NA	NA	NA	NA		NA	NA		0	0	0	0	0	0	0	0	0	0	0	0	2	0	0	0	0	0			-0.267261	-0.267261	-0.267261	-0.267261	-0.267261	-0.267261	-0.267261	-0.267261	-0.267261	-0.267261	-0.267261	-0.267261	3.74166	-0.267261
OG0019575	N	N	Y		0	0		NA	NA	NA	NA		NA	NA		0	0	0	0	0	0	0	0	0	0	0	0	2	0	0	0	0	0			-0.267261	-0.267261	-0.267261	-0.267261	-0.267261	-0.267261	-0.267261	-0.267261	-0.267261	-0.267261	-0.267261	-0.267261	3.74166	-0.267261
OG0019610	N	N	Y		0	0		NA	NA	NA	NA		NA	NA		0	0	0	2	0	0	0	0	0	0	0	0	0	0	0	0	0	0			-0.267261	-0.267261	-0.267261	3.74166	-0.267261	-0.267261	-0.267261	-0.267261	-0.267261	-0.267261	-0.267261	-0.267261	-0.267261	-0.267261
OG0019613	N	N	Y		0	0		NA	NA	NA	NA		NA	NA		0	0	0	2	0	0	0	0	0	0	0	0	0	0	0	0	0	0			-0.267261	-0.267261	-0.267261	3.74166	-0.267261	-0.267261	-0.267261	-0.267261	-0.267261	-0.267261	-0.267261	-0.267261	-0.267261	-0.267261
OG0019618	N	N	Y		0	0		NA	NA	NA	NA		NA	NA		0	0	0	2	0	0	0	0	0	0	0	0	0	0	0	0	0	0			-0.267261	-0.267261	-0.267261	3.74166	-0.267261	-0.267261	-0.267261	-0.267261	-0.267261	-0.267261	-0.267261	-0.267261	-0.267261	-0.267261
OG0019627	N	N	Y		0	0		NA	NA	NA	NA		NA	NA		0	0	0	2	0	0	0	0	0	0	0	0	0	0	0	0	0	0			-0.267261	-0.267261	-0.267261	3.74166	-0.267261	-0.267261	-0.267261	-0.267261	-0.267261	-0.267261	-0.267261	-0.267261	-0.267261	-0.267261
OG0019628	N	N	Y		0	0		NA	NA	NA	NA		NA	NA		0	0	0	2	0	0	0	0	0	0	0	0	0	0	0	0	0	0			-0.267261	-0.267261	-0.267261	3.74166	-0.267261	-0.267261	-0.267261	-0.267261	-0.267261	-0.267261	-0.267261	-0.267261	-0.267261	-0.267261
OG0019629	N	N	Y		0	0		NA	NA	NA	NA		NA	NA		0	0	0	2	0	0	0	0	0	0	0	0	0	0	0	0	0	0			-0.267261	-0.267261	-0.267261	3.74166	-0.267261	-0.267261	-0.267261	-0.267261	-0.267261	-0.267261	-0.267261	-0.267261	-0.267261	-0.267261
OG0019638	N	N	Y		0	0		NA	NA	NA	NA		NA	NA		0	0	0	2	0	0	0	0	0	0	0	0	0	0	0	0	0	0			-0.267261	-0.267261	-0.267261	3.74166	-0.267261	-0.267261	-0.267261	-0.267261	-0.267261	-0.267261	-0.267261	-0.267261	-0.267261	-0.267261
OG0019642	N	N	Y		0	0		NA	NA	NA	NA		NA	NA		0	0	0	2	0	0	0	0	0	0	0	0	0	0	0	0	0	0			-0.267261	-0.267261	-0.267261	3.74166	-0.267261	-0.267261	-0.267261	-0.267261	-0.267261	-0.267261	-0.267261	-0.267261	-0.267261	-0.267261
OG0019651	N	N	Y		0	0		NA	NA	NA	NA		NA	NA		0	0	0	2	0	0	0	0	0	0	0	0	0	0	0	0	0	0			-0.267261	-0.267261	-0.267261	3.74166	-0.267261	-0.267261	-0.267261	-0.267261	-0.267261	-0.267261	-0.267261	-0.267261	-0.267261	-0.267261
OG0019658	N	N	Y		0	0		NA	NA	NA	NA		NA	NA		0	0	0	2	0	0	0	0	0	0	0	0	0	0	0	0	0	0			-0.267261	-0.267261	-0.267261	3.74166	-0.267261	-0.267261	-0.267261	-0.267261	-0.267261	-0.267261	-0.267261	-0.267261	-0.267261	-0.267261
OG0019675	N	N	Y		0	0		NA	NA	NA	NA		NA	NA		0	0	0	2	0	0	0	0	0	0	0	0	0	0	0	0	0	0			-0.267261	-0.267261	-0.267261	3.74166	-0.267261	-0.267261	-0.267261	-0.267261	-0.267261	-0.267261	-0.267261	-0.267261	-0.267261	-0.267261
OG0019676	N	N	Y		0	0		NA	NA	NA	NA		NA	NA		0	0	0	2	0	0	0	0	0	0	0	0	0	0	0	0	0	0			-0.267261	-0.267261	-0.267261	3.74166	-0.267261	-0.267261	-0.267261	-0.267261	-0.267261	-0.267261	-0.267261	-0.267261	-0.267261	-0.267261
OG0019682	N	N	Y		0	0		NA	NA	NA	NA		NA	NA		0	0	0	2	0	0	0	0	0	0	0	0	0	0	0	0	0	0			-0.267261	-0.267261	-0.267261	3.74166	-0.267261	-0.267261	-0.267261	-0.267261	-0.267261	-0.267261	-0.267261	-0.267261	-0.267261	-0.267261
OG0019702	N	N	Y		0	0		NA	NA	NA	NA		NA	NA		0	0	0	1	0	0	0	0	0	0	0	0	0	0	0	1	0	0			-0.267261	-0.267261	-0.267261	3.74166	-0.267261	-0.267261	-0.267261	-0.267261	-0.267261	-0.267261	-0.267261	-0.267261	-0.267261	-0.267261
OG0019705	N	N	Y		0	0		NA	NA	NA	NA		NA	NA		0	0	0	2	0	0	0	0	0	0	0	0	0	0	0	0	0	0			-0.267261	-0.267261	-0.267261	3.74166	-0.267261	-0.267261	-0.267261	-0.267261	-0.267261	-0.267261	-0.267261	-0.267261	-0.267261	-0.267261
OG0019745	N	N	Y		0	0		NA	NA	NA	NA		NA	NA		0	0	0	0	0	0	0	0	0	0	0	0	0	0	0	1	0	1			#NUM!	#NUM!	#NUM!	#NUM!	#NUM!	#NUM!	#NUM!	#NUM!	#NUM!	#NUM!	#NUM!	#NUM!	#NUM!	#NUM!
OG0019746	N	N	Y		0	0		NA	NA	NA	NA		NA	NA		0	0	0	0	0	0	0	0	0	1	0	0	0	0	0	1	0	0			-0.267261	-0.267261	-0.267261	-0.267261	-0.267261	-0.267261	-0.267261	-0.267261	-0.267261	3.74166	-0.267261	-0.267261	-0.267261	-0.267261
OG0019747	N	N	Y		0	0		NA	NA	NA	NA		NA	NA		1	0	0	0	0	0	0	0	0	0	0	0	0	0	0	1	0	0			3.74166	-0.267261	-0.267261	-0.267261	-0.267261	-0.267261	-0.267261	-0.267261	-0.267261	-0.267261	-0.267261	-0.267261	-0.267261	-0.267261
OG0019748	N	N	Y		0	0		NA	NA	NA	NA		NA	NA		0	1	0	0	0	0	0	0	0	0	0	0	0	0	0	1	0	0			-0.267261	3.74166	-0.267261	-0.267261	-0.267261	-0.267261	-0.267261	-0.267261	-0.267261	-0.267261	-0.267261	-0.267261	-0.267261	-0.267261
OG0019749	N	N	Y		0	0		NA	NA	NA	NA		NA	NA		0	0	0	0	0	1	0	0	0	0	0	0	0	0	0	1	0	0			-0.267261	-0.267261	-0.267261	-0.267261	-0.267261	3.74166	-0.267261	-0.267261	-0.267261	-0.267261	-0.267261	-0.267261	-0.267261	-0.267261
OG0019750	N	N	Y		0	0		NA	NA	NA	NA		NA	NA		0	0	0	0	1	0	0	0	0	0	0	0	0	0	0	1	0	0			-0.267261	-0.267261	-0.267261	-0.267261	3.74166	-0.267261	-0.267261	-0.267261	-0.267261	-0.267261	-0.267261	-0.267261	-0.267261	-0.267261
OG0019751	N	N	Y		0	0		NA	NA	NA	NA		NA	NA		0	0	0	0	0	0	0	1	0	0	0	0	0	0	0	1	0	0			-0.267261	-0.267261	-0.267261	-0.267261	-0.267261	-0.267261	-0.267261	3.74166	-0.267261	-0.267261	-0.267261	-0.267261	-0.267261	-0.267261
OG0019752	N	N	Y		0	0		NA	NA	NA	NA		NA	NA		0	0	0	0	0	0	0	0	0	0	0	0	0	0	0	1	1	0			#NUM!	#NUM!	#NUM!	#NUM!	#NUM!	#NUM!	#NUM!	#NUM!	#NUM!	#NUM!	#NUM!	#NUM!	#NUM!	#NUM!
OG0019753	N	N	Y		0	0		NA	NA	NA	NA		NA	NA		0	0	0	0	0	0	0	0	0	0	0	0	0	0	0	2	0	0			#NUM!	#NUM!	#NUM!	#NUM!	#NUM!	#NUM!	#NUM!	#NUM!	#NUM!	#NUM!	#NUM!	#NUM!	#NUM!	#NUM!
OG0019754	N	N	Y		0	0		NA	NA	NA	NA		NA	NA		0	0	0	0	0	0	0	0	0	0	0	0	0	0	0	2	0	0			#NUM!	#NUM!	#NUM!	#NUM!	#NUM!	#NUM!	#NUM!	#NUM!	#NUM!	#NUM!	#NUM!	#NUM!	#NUM!	#NUM!
OG0019755	N	N	Y		0	0		NA	NA	NA	NA		NA	NA		0	0	0	0	0	0	0	1	0	0	0	0	0	0	0	1	0	0			-0.267261	-0.267261	-0.267261	-0.267261	-0.267261	-0.267261	-0.267261	3.74166	-0.267261	-0.267261	-0.267261	-0.267261	-0.267261	-0.267261
OG0019756	N	N	Y		0	0		NA	NA	NA	NA		NA	NA		0	0	0	0	0	0	0	0	0	0	0	0	0	0	0	1	0	1			#NUM!	#NUM!	#NUM!	#NUM!	#NUM!	#NUM!	#NUM!	#NUM!	#NUM!	#NUM!	#NUM!	#NUM!	#NUM!	#NUM!
OG0019757	N	N	Y		0	0		NA	NA	NA	NA		NA	NA		1	0	0	0	0	0	0	0	0	0	0	0	0	0	0	1	0	0			3.74166	-0.267261	-0.267261	-0.267261	-0.267261	-0.267261	-0.267261	-0.267261	-0.267261	-0.267261	-0.267261	-0.267261	-0.267261	-0.267261
OG0019758	N	N	Y		0	0		NA	NA	NA	NA		NA	NA		0	1	0	0	0	0	0	0	0	0	0	0	0	0	0	1	0	0			-0.267261	3.74166	-0.267261	-0.267261	-0.267261	-0.267261	-0.267261	-0.267261	-0.267261	-0.267261	-0.267261	-0.267261	-0.267261	-0.267261
OG0019759	N	N	Y		0	0		NA	NA	NA	NA		NA	NA		0	0	0	0	0	0	0	0	0	0	0	0	0	0	0	1	1	0			#NUM!	#NUM!	#NUM!	#NUM!	#NUM!	#NUM!	#NUM!	#NUM!	#NUM!	#NUM!	#NUM!	#NUM!	#NUM!	#NUM!
OG0019760	N	N	Y		0	0		NA	NA	NA	NA		NA	NA		0	0	0	0	0	0	0	0	0	0	0	0	0	0	0	2	0	0			#NUM!	#NUM!	#NUM!	#NUM!	#NUM!	#NUM!	#NUM!	#NUM!	#NUM!	#NUM!	#NUM!	#NUM!	#NUM!	#NUM!
OG0019761	N	N	Y		0	0		NA	NA	NA	NA		NA	NA		0	0	0	0	0	0	0	0	0	1	0	0	0	0	0	1	0	0			-0.267261	-0.267261	-0.267261	-0.267261	-0.267261	-0.267261	-0.267261	-0.267261	-0.267261	3.74166	-0.267261	-0.267261	-0.267261	-0.267261
OG0019762	N	N	Y		0	0		NA	NA	NA	NA		NA	NA		0	0	0	0	0	0	0	0	0	0	0	0	0	0	0	1	1	0			#NUM!	#NUM!	#NUM!	#NUM!	#NUM!	#NUM!	#NUM!	#NUM!	#NUM!	#NUM!	#NUM!	#NUM!	#NUM!	#NUM!
OG0019763	N	N	Y		0	0		NA	NA	NA	NA		NA	NA		0	0	0	0	0	0	0	0	0	0	1	0	0	0	0	1	0	0			-0.267261	-0.267261	-0.267261	-0.267261	-0.267261	-0.267261	-0.267261	-0.267261	-0.267261	-0.267261	3.74166	-0.267261	-0.267261	-0.267261
OG0019764	N	N	Y		0	0		NA	NA	NA	NA		NA	NA		0	0	0	0	0	0	0	1	0	0	0	0	0	0	0	1	0	0			-0.267261	-0.267261	-0.267261	-0.267261	-0.267261	-0.267261	-0.267261	3.74166	-0.267261	-0.267261	-0.267261	-0.267261	-0.267261	-0.267261
OG0019765	N	N	Y		0	0		NA	NA	NA	NA		NA	NA		0	0	0	0	0	0	1	0	0	0	0	0	0	0	0	1	0	0			-0.267261	-0.267261	-0.267261	-0.267261	-0.267261	-0.267261	3.74166	-0.267261	-0.267261	-0.267261	-0.267261	-0.267261	-0.267261	-0.267261
OG0019766	N	N	Y		0	0		NA	NA	NA	NA		NA	NA		0	0	0	0	0	0	0	0	0	0	0	0	0	0	0	2	0	0			#NUM!	#NUM!	#NUM!	#NUM!	#NUM!	#NUM!	#NUM!	#NUM!	#NUM!	#NUM!	#NUM!	#NUM!	#NUM!	#NUM!
OG0019767	N	N	Y		0	0		NA	NA	NA	NA		NA	NA		0	1	0	0	0	0	0	0	0	0	0	0	0	0	0	1	0	0			-0.267261	3.74166	-0.267261	-0.267261	-0.267261	-0.267261	-0.267261	-0.267261	-0.267261	-0.267261	-0.267261	-0.267261	-0.267261	-0.267261
OG0019768	N	N	Y		0	0		NA	NA	NA	NA		NA	NA		0	1	0	0	0	0	0	0	0	0	0	0	0	0	0	1	0	0			-0.267261	3.74166	-0.267261	-0.267261	-0.267261	-0.267261	-0.267261	-0.267261	-0.267261	-0.267261	-0.267261	-0.267261	-0.267261	-0.267261
OG0019769	N	N	Y		0	0		NA	NA	NA	NA		NA	NA		0	0	0	0	0	0	0	0	0	0	0	0	0	0	0	2	0	0			#NUM!	#NUM!	#NUM!	#NUM!	#NUM!	#NUM!	#NUM!	#NUM!	#NUM!	#NUM!	#NUM!	#NUM!	#NUM!	#NUM!
OG0019770	N	N	Y		0	0		NA	NA	NA	NA		NA	NA		0	0	0	0	0	0	0	0	0	0	0	0	0	0	0	1	1	0			#NUM!	#NUM!	#NUM!	#NUM!	#NUM!	#NUM!	#NUM!	#NUM!	#NUM!	#NUM!	#NUM!	#NUM!	#NUM!	#NUM!
OG0019771	N	N	Y		0	0		NA	NA	NA	NA		NA	NA		0	0	0	0	0	0	0	0	0	0	0	0	0	0	1	1	0	0			-0.267261	-0.267261	-0.267261	-0.267261	-0.267261	-0.267261	-0.267261	-0.267261	-0.267261	-0.267261	-0.267261	-0.267261	-0.267261	-0.267261
OG0019772	N	N	Y		0	0		NA	NA	NA	NA		NA	NA		0	0	0	0	0	0	0	0	0	0	0	0	0	0	0	1	1	0			#NUM!	#NUM!	#NUM!	#NUM!	#NUM!	#NUM!	#NUM!	#NUM!	#NUM!	#NUM!	#NUM!	#NUM!	#NUM!	#NUM!
OG0019773	N	N	Y		0	0		NA	NA	NA	NA		NA	NA		1	0	0	0	0	0	0	0	0	0	0	0	0	0	0	1	0	0			3.74166	-0.267261	-0.267261	-0.267261	-0.267261	-0.267261	-0.267261	-0.267261	-0.267261	-0.267261	-0.267261	-0.267261	-0.267261	-0.267261
OG0019774	N	N	Y		0	0		NA	NA	NA	NA		NA	NA		0	0	0	0	0	0	1	0	0	0	0	0	0	0	0	1	0	0			-0.267261	-0.267261	-0.267261	-0.267261	-0.267261	-0.267261	3.74166	-0.267261	-0.267261	-0.267261	-0.267261	-0.267261	-0.267261	-0.267261
OG0019775	N	N	Y		0	0		NA	NA	NA	NA		NA	NA		0	0	0	0	0	0	0	0	0	1	0	0	0	0	0	1	0	0			-0.267261	-0.267261	-0.267261	-0.267261	-0.267261	-0.267261	-0.267261	-0.267261	-0.267261	3.74166	-0.267261	-0.267261	-0.267261	-0.267261
OG0019776	N	N	Y		0	0		NA	NA	NA	NA		NA	NA		0	0	0	0	0	0	0	0	0	0	0	0	0	0	0	2	0	0			#NUM!	#NUM!	#NUM!	#NUM!	#NUM!	#NUM!	#NUM!	#NUM!	#NUM!	#NUM!	#NUM!	#NUM!	#NUM!	#NUM!
OG0019777	N	N	Y		0	0		NA	NA	NA	NA		NA	NA		1	0	0	0	0	0	0	0	0	0	0	0	0	0	0	1	0	0			3.74166	-0.267261	-0.267261	-0.267261	-0.267261	-0.267261	-0.267261	-0.267261	-0.267261	-0.267261	-0.267261	-0.267261	-0.267261	-0.267261
OG0019778	N	N	Y		0	0		NA	NA	NA	NA		NA	NA		0	0	0	0	0	0	0	0	0	1	0	0	0	0	0	1	0	0			-0.267261	-0.267261	-0.267261	-0.267261	-0.267261	-0.267261	-0.267261	-0.267261	-0.267261	3.74166	-0.267261	-0.267261	-0.267261	-0.267261
OG0019779	N	N	Y		0	0		NA	NA	NA	NA		NA	NA		0	0	0	0	0	0	0	0	0	0	0	0	0	0	0	2	0	0			#NUM!	#NUM!	#NUM!	#NUM!	#NUM!	#NUM!	#NUM!	#NUM!	#NUM!	#NUM!	#NUM!	#NUM!	#NUM!	#NUM!
OG0019780	N	N	Y		0	0		NA	NA	NA	NA		NA	NA		0	0	0	0	0	0	0	0	0	0	1	0	0	0	0	1	0	0			-0.267261	-0.267261	-0.267261	-0.267261	-0.267261	-0.267261	-0.267261	-0.267261	-0.267261	-0.267261	3.74166	-0.267261	-0.267261	-0.267261
OG0019781	N	N	Y		0	0		NA	NA	NA	NA		NA	NA		0	0	0	0	0	0	0	0	0	0	0	0	0	0	0	1	1	0			#NUM!	#NUM!	#NUM!	#NUM!	#NUM!	#NUM!	#NUM!	#NUM!	#NUM!	#NUM!	#NUM!	#NUM!	#NUM!	#NUM!
OG0019782	N	N	Y		0	0		NA	NA	NA	NA		NA	NA		0	0	0	0	0	1	0	0	0	0	0	0	0	0	0	1	0	0			-0.267261	-0.267261	-0.267261	-0.267261	-0.267261	3.74166	-0.267261	-0.267261	-0.267261	-0.267261	-0.267261	-0.267261	-0.267261	-0.267261
OG0019783	N	N	Y		0	0		NA	NA	NA	NA		NA	NA		0	0	1	0	0	0	0	0	0	0	0	0	0	0	0	1	0	0			-0.267261	-0.267261	3.74166	-0.267261	-0.267261	-0.267261	-0.267261	-0.267261	-0.267261	-0.267261	-0.267261	-0.267261	-0.267261	-0.267261
OG0019784	N	N	Y		0	0		NA	NA	NA	NA		NA	NA		0	0	0	0	0	0	0	0	0	0	0	0	0	0	0	2	0	0			#NUM!	#NUM!	#NUM!	#NUM!	#NUM!	#NUM!	#NUM!	#NUM!	#NUM!	#NUM!	#NUM!	#NUM!	#NUM!	#NUM!
OG0019785	N	N	Y		0	0		NA	NA	NA	NA		NA	NA		0	0	0	0	0	0	0	0	0	1	0	0	0	0	0	1	0	0			-0.267261	-0.267261	-0.267261	-0.267261	-0.267261	-0.267261	-0.267261	-0.267261	-0.267261	3.74166	-0.267261	-0.267261	-0.267261	-0.267261
OG0019786	N	N	Y		0	0		NA	NA	NA	NA		NA	NA		0	0	0	0	0	0	0	0	0	0	0	0	0	0	0	2	0	0			#NUM!	#NUM!	#NUM!	#NUM!	#NUM!	#NUM!	#NUM!	#NUM!	#NUM!	#NUM!	#NUM!	#NUM!	#NUM!	#NUM!
OG0019787	N	N	Y		0	0		NA	NA	NA	NA		NA	NA		0	0	0	0	0	0	0	0	0	1	0	0	0	0	0	1	0	0			-0.267261	-0.267261	-0.267261	-0.267261	-0.267261	-0.267261	-0.267261	-0.267261	-0.267261	3.74166	-0.267261	-0.267261	-0.267261	-0.267261
OG0019788	N	N	Y		0	0		NA	NA	NA	NA		NA	NA		0	0	0	0	0	0	0	0	0	1	0	0	0	0	0	1	0	0			-0.267261	-0.267261	-0.267261	-0.267261	-0.267261	-0.267261	-0.267261	-0.267261	-0.267261	3.74166	-0.267261	-0.267261	-0.267261	-0.267261
OG0019789	N	N	Y		0	0		NA	NA	NA	NA		NA	NA		0	0	0	0	0	0	0	0	0	1	0	0	0	0	0	1	0	0			-0.267261	-0.267261	-0.267261	-0.267261	-0.267261	-0.267261	-0.267261	-0.267261	-0.267261	3.74166	-0.267261	-0.267261	-0.267261	-0.267261
OG0019790	N	N	Y		0	0		NA	NA	NA	NA		NA	NA		0	0	0	0	0	0	0	0	0	0	0	0	0	0	0	2	0	0			#NUM!	#NUM!	#NUM!	#NUM!	#NUM!	#NUM!	#NUM!	#NUM!	#NUM!	#NUM!	#NUM!	#NUM!	#NUM!	#NUM!
OG0019791	N	N	Y		0	0		NA	NA	NA	NA		NA	NA		0	0	0	0	0	0	0	0	0	1	0	0	0	0	0	1	0	0			-0.267261	-0.267261	-0.267261	-0.267261	-0.267261	-0.267261	-0.267261	-0.267261	-0.267261	3.74166	-0.267261	-0.267261	-0.267261	-0.267261
OG0019792	N	N	Y		0	0		NA	NA	NA	NA		NA	NA		0	0	0	0	0	1	0	0	0	0	0	0	0	0	0	1	0	0			-0.267261	-0.267261	-0.267261	-0.267261	-0.267261	3.74166	-0.267261	-0.267261	-0.267261	-0.267261	-0.267261	-0.267261	-0.267261	-0.267261
OG0019793	N	N	Y		0	0		NA	NA	NA	NA		NA	NA		0	0	0	0	0	0	0	0	0	0	0	0	0	0	0	1	1	0			#NUM!	#NUM!	#NUM!	#NUM!	#NUM!	#NUM!	#NUM!	#NUM!	#NUM!	#NUM!	#NUM!	#NUM!	#NUM!	#NUM!
OG0019794	N	N	Y		0	0		NA	NA	NA	NA		NA	NA		0	0	0	0	0	0	0	0	0	1	0	0	0	0	0	1	0	0			-0.267261	-0.267261	-0.267261	-0.267261	-0.267261	-0.267261	-0.267261	-0.267261	-0.267261	3.74166	-0.267261	-0.267261	-0.267261	-0.267261
OG0019795	N	N	Y		0	0		NA	NA	NA	NA		NA	NA		0	0	0	0	0	0	0	0	0	0	0	0	0	0	0	2	0	0			#NUM!	#NUM!	#NUM!	#NUM!	#NUM!	#NUM!	#NUM!	#NUM!	#NUM!	#NUM!	#NUM!	#NUM!	#NUM!	#NUM!
OG0019796	N	N	Y		0	0		NA	NA	NA	NA		NA	NA		0	0	0	0	0	0	0	0	0	0	0	0	0	0	0	2	0	0			#NUM!	#NUM!	#NUM!	#NUM!	#NUM!	#NUM!	#NUM!	#NUM!	#NUM!	#NUM!	#NUM!	#NUM!	#NUM!	#NUM!
OG0019797	N	N	Y		0	0		NA	NA	NA	NA		NA	NA		0	0	0	0	0	0	0	0	1	0	0	0	0	0	0	1	0	0			-0.267261	-0.267261	-0.267261	-0.267261	-0.267261	-0.267261	-0.267261	-0.267261	3.74166	-0.267261	-0.267261	-0.267261	-0.267261	-0.267261
OG0019798	N	N	Y		0	0		NA	NA	NA	NA		NA	NA		0	0	0	0	0	0	0	0	0	1	0	0	0	0	0	1	0	0			-0.267261	-0.267261	-0.267261	-0.267261	-0.267261	-0.267261	-0.267261	-0.267261	-0.267261	3.74166	-0.267261	-0.267261	-0.267261	-0.267261
OG0019799	N	N	Y		0	0		NA	NA	NA	NA		NA	NA		0	0	0	0	0	0	0	0	0	0	0	0	0	0	0	1	1	0			#NUM!	#NUM!	#NUM!	#NUM!	#NUM!	#NUM!	#NUM!	#NUM!	#NUM!	#NUM!	#NUM!	#NUM!	#NUM!	#NUM!
OG0019800	N	N	Y		0	0		NA	NA	NA	NA		NA	NA		0	0	0	0	0	1	0	0	0	0	0	0	0	0	0	1	0	0			-0.267261	-0.267261	-0.267261	-0.267261	-0.267261	3.74166	-0.267261	-0.267261	-0.267261	-0.267261	-0.267261	-0.267261	-0.267261	-0.267261
OG0019801	N	N	Y		0	0		NA	NA	NA	NA		NA	NA		1	0	0	0	0	0	0	0	0	0	0	0	0	0	0	1	0	0			3.74166	-0.267261	-0.267261	-0.267261	-0.267261	-0.267261	-0.267261	-0.267261	-0.267261	-0.267261	-0.267261	-0.267261	-0.267261	-0.267261
OG0019802	N	N	Y		0	0		NA	NA	NA	NA		NA	NA		0	0	0	0	0	1	0	0	0	0	0	0	0	0	0	1	0	0			-0.267261	-0.267261	-0.267261	-0.267261	-0.267261	3.74166	-0.267261	-0.267261	-0.267261	-0.267261	-0.267261	-0.267261	-0.267261	-0.267261
OG0019803	N	N	Y		0	0		NA	NA	NA	NA		NA	NA		0	0	0	0	0	0	0	0	0	0	0	0	0	0	0	1	1	0			#NUM!	#NUM!	#NUM!	#NUM!	#NUM!	#NUM!	#NUM!	#NUM!	#NUM!	#NUM!	#NUM!	#NUM!	#NUM!	#NUM!
OG0019804	N	N	Y		0	0		NA	NA	NA	NA		NA	NA		0	0	0	0	0	0	0	0	0	0	0	0	0	0	0	1	0	1			#NUM!	#NUM!	#NUM!	#NUM!	#NUM!	#NUM!	#NUM!	#NUM!	#NUM!	#NUM!	#NUM!	#NUM!	#NUM!	#NUM!
OG0019805	N	N	Y		0	0		NA	NA	NA	NA		NA	NA		0	0	0	0	0	0	0	0	0	0	0	0	0	0	0	1	0	1			#NUM!	#NUM!	#NUM!	#NUM!	#NUM!	#NUM!	#NUM!	#NUM!	#NUM!	#NUM!	#NUM!	#NUM!	#NUM!	#NUM!
OG0019806	N	N	Y		0	0		NA	NA	NA	NA		NA	NA		0	0	0	0	0	0	0	0	0	0	0	0	0	0	0	2	0	0			#NUM!	#NUM!	#NUM!	#NUM!	#NUM!	#NUM!	#NUM!	#NUM!	#NUM!	#NUM!	#NUM!	#NUM!	#NUM!	#NUM!
OG0019807	N	N	Y		0	0		NA	NA	NA	NA		NA	NA		0	0	0	0	0	0	0	0	0	0	0	0	0	0	0	1	1	0			#NUM!	#NUM!	#NUM!	#NUM!	#NUM!	#NUM!	#NUM!	#NUM!	#NUM!	#NUM!	#NUM!	#NUM!	#NUM!	#NUM!
OG0019808	N	N	Y		0	0		NA	NA	NA	NA		NA	NA		0	0	0	0	0	0	0	0	0	1	0	0	0	0	0	1	0	0			-0.267261	-0.267261	-0.267261	-0.267261	-0.267261	-0.267261	-0.267261	-0.267261	-0.267261	3.74166	-0.267261	-0.267261	-0.267261	-0.267261
OG0019809	N	N	Y		0	0		NA	NA	NA	NA		NA	NA		1	0	0	0	0	0	0	0	0	0	0	0	0	0	0	1	0	0			3.74166	-0.267261	-0.267261	-0.267261	-0.267261	-0.267261	-0.267261	-0.267261	-0.267261	-0.267261	-0.267261	-0.267261	-0.267261	-0.267261
OG0019810	N	N	Y		0	0		NA	NA	NA	NA		NA	NA		0	0	0	0	0	0	0	0	0	0	0	0	0	0	0	2	0	0			#NUM!	#NUM!	#NUM!	#NUM!	#NUM!	#NUM!	#NUM!	#NUM!	#NUM!	#NUM!	#NUM!	#NUM!	#NUM!	#NUM!
OG0019811	N	N	Y		0	0		NA	NA	NA	NA		NA	NA		0	0	0	0	0	0	0	0	0	0	0	0	0	0	0	1	1	0			#NUM!	#NUM!	#NUM!	#NUM!	#NUM!	#NUM!	#NUM!	#NUM!	#NUM!	#NUM!	#NUM!	#NUM!	#NUM!	#NUM!
OG0019812	N	N	Y		0	0		NA	NA	NA	NA		NA	NA		0	0	0	0	0	1	0	0	0	0	0	0	0	0	0	1	0	0			-0.267261	-0.267261	-0.267261	-0.267261	-0.267261	3.74166	-0.267261	-0.267261	-0.267261	-0.267261	-0.267261	-0.267261	-0.267261	-0.267261
OG0019813	N	N	Y		0	0		NA	NA	NA	NA		NA	NA		0	0	0	0	1	0	0	0	0	0	0	0	0	0	0	1	0	0			-0.267261	-0.267261	-0.267261	-0.267261	3.74166	-0.267261	-0.267261	-0.267261	-0.267261	-0.267261	-0.267261	-0.267261	-0.267261	-0.267261
OG0019814	N	N	Y		0	0		NA	NA	NA	NA		NA	NA		0	0	0	0	0	0	0	0	0	0	0	0	0	0	1	1	0	0			-0.267261	-0.267261	-0.267261	-0.267261	-0.267261	-0.267261	-0.267261	-0.267261	-0.267261	-0.267261	-0.267261	-0.267261	-0.267261	-0.267261
OG0019815	N	N	Y		0	0		NA	NA	NA	NA		NA	NA		0	0	0	0	0	0	0	0	0	0	0	0	0	0	0	2	0	0			#NUM!	#NUM!	#NUM!	#NUM!	#NUM!	#NUM!	#NUM!	#NUM!	#NUM!	#NUM!	#NUM!	#NUM!	#NUM!	#NUM!
OG0019816	N	N	Y		0	0		NA	NA	NA	NA		NA	NA		0	0	0	0	0	0	0	0	0	0	0	0	0	0	0	1	0	1			#NUM!	#NUM!	#NUM!	#NUM!	#NUM!	#NUM!	#NUM!	#NUM!	#NUM!	#NUM!	#NUM!	#NUM!	#NUM!	#NUM!
OG0019817	N	N	Y		0	0		NA	NA	NA	NA		NA	NA		0	0	0	0	0	0	0	0	0	1	0	0	0	0	0	1	0	0			-0.267261	-0.267261	-0.267261	-0.267261	-0.267261	-0.267261	-0.267261	-0.267261	-0.267261	3.74166	-0.267261	-0.267261	-0.267261	-0.267261
OG0019818	N	N	Y		0	0		NA	NA	NA	NA		NA	NA		0	0	0	0	0	0	0	0	0	0	0	0	0	0	0	1	1	0			#NUM!	#NUM!	#NUM!	#NUM!	#NUM!	#NUM!	#NUM!	#NUM!	#NUM!	#NUM!	#NUM!	#NUM!	#NUM!	#NUM!
OG0019819	N	N	Y		0	0		NA	NA	NA	NA		NA	NA		1	0	0	0	0	0	0	0	0	0	0	0	0	0	0	1	0	0			3.74166	-0.267261	-0.267261	-0.267261	-0.267261	-0.267261	-0.267261	-0.267261	-0.267261	-0.267261	-0.267261	-0.267261	-0.267261	-0.267261
OG0019820	N	N	Y		0	0		NA	NA	NA	NA		NA	NA		0	0	0	0	0	0	0	0	0	0	0	0	0	0	0	1	0	1			#NUM!	#NUM!	#NUM!	#NUM!	#NUM!	#NUM!	#NUM!	#NUM!	#NUM!	#NUM!	#NUM!	#NUM!	#NUM!	#NUM!
OG0019821	N	N	Y		0	0		NA	NA	NA	NA		NA	NA		0	0	0	0	0	0	0	1	0	0	0	0	0	0	0	1	0	0			-0.267261	-0.267261	-0.267261	-0.267261	-0.267261	-0.267261	-0.267261	3.74166	-0.267261	-0.267261	-0.267261	-0.267261	-0.267261	-0.267261
OG0019822	N	N	Y		0	0		NA	NA	NA	NA		NA	NA		0	0	0	0	0	0	0	0	0	0	0	0	0	0	0	1	1	0			#NUM!	#NUM!	#NUM!	#NUM!	#NUM!	#NUM!	#NUM!	#NUM!	#NUM!	#NUM!	#NUM!	#NUM!	#NUM!	#NUM!
OG0019823	N	N	Y		0	0		NA	NA	NA	NA		NA	NA		0	0	0	0	0	0	0	0	0	0	0	0	0	0	0	2	0	0			#NUM!	#NUM!	#NUM!	#NUM!	#NUM!	#NUM!	#NUM!	#NUM!	#NUM!	#NUM!	#NUM!	#NUM!	#NUM!	#NUM!
OG0019824	N	N	Y		0	0		NA	NA	NA	NA		NA	NA		0	0	0	0	0	0	0	0	0	0	0	0	0	0	0	1	1	0			#NUM!	#NUM!	#NUM!	#NUM!	#NUM!	#NUM!	#NUM!	#NUM!	#NUM!	#NUM!	#NUM!	#NUM!	#NUM!	#NUM!
OG0019825	N	N	Y		0	0		NA	NA	NA	NA		NA	NA		0	0	0	0	0	0	0	0	0	0	0	0	0	0	0	1	1	0			#NUM!	#NUM!	#NUM!	#NUM!	#NUM!	#NUM!	#NUM!	#NUM!	#NUM!	#NUM!	#NUM!	#NUM!	#NUM!	#NUM!
OG0019826	N	N	Y		0	0		NA	NA	NA	NA		NA	NA		0	0	0	0	0	0	0	0	0	1	0	0	0	0	0	1	0	0			-0.267261	-0.267261	-0.267261	-0.267261	-0.267261	-0.267261	-0.267261	-0.267261	-0.267261	3.74166	-0.267261	-0.267261	-0.267261	-0.267261
OG0019827	N	N	Y		0	0		NA	NA	NA	NA		NA	NA		1	0	0	0	0	0	0	0	0	0	0	0	0	0	0	1	0	0			3.74166	-0.267261	-0.267261	-0.267261	-0.267261	-0.267261	-0.267261	-0.267261	-0.267261	-0.267261	-0.267261	-0.267261	-0.267261	-0.267261
OG0019828	N	N	Y		0	0		NA	NA	NA	NA		NA	NA		0	0	0	0	0	0	0	0	0	0	0	0	0	0	0	1	1	0			#NUM!	#NUM!	#NUM!	#NUM!	#NUM!	#NUM!	#NUM!	#NUM!	#NUM!	#NUM!	#NUM!	#NUM!	#NUM!	#NUM!
OG0019829	N	N	Y		0	0		NA	NA	NA	NA		NA	NA		0	0	0	0	0	0	0	0	0	1	0	0	0	0	0	1	0	0			-0.267261	-0.267261	-0.267261	-0.267261	-0.267261	-0.267261	-0.267261	-0.267261	-0.267261	3.74166	-0.267261	-0.267261	-0.267261	-0.267261
OG0019830	N	N	Y		0	0		NA	NA	NA	NA		NA	NA		0	0	0	0	0	0	0	0	0	0	0	0	0	0	0	1	1	0			#NUM!	#NUM!	#NUM!	#NUM!	#NUM!	#NUM!	#NUM!	#NUM!	#NUM!	#NUM!	#NUM!	#NUM!	#NUM!	#NUM!
OG0019831	N	N	Y		0	0		NA	NA	NA	NA		NA	NA		0	0	0	0	0	0	0	0	0	0	0	0	0	0	0	1	1	0			#NUM!	#NUM!	#NUM!	#NUM!	#NUM!	#NUM!	#NUM!	#NUM!	#NUM!	#NUM!	#NUM!	#NUM!	#NUM!	#NUM!
OG0019832	N	N	Y		0	0		NA	NA	NA	NA		NA	NA		0	0	0	0	1	0	0	0	0	0	0	0	0	0	0	1	0	0			-0.267261	-0.267261	-0.267261	-0.267261	3.74166	-0.267261	-0.267261	-0.267261	-0.267261	-0.267261	-0.267261	-0.267261	-0.267261	-0.267261
OG0019833	N	N	Y		0	0		NA	NA	NA	NA		NA	NA		1	0	0	0	0	0	0	0	0	0	0	0	0	0	0	1	0	0			3.74166	-0.267261	-0.267261	-0.267261	-0.267261	-0.267261	-0.267261	-0.267261	-0.267261	-0.267261	-0.267261	-0.267261	-0.267261	-0.267261
OG0019834	N	N	Y		0	0		NA	NA	NA	NA		NA	NA		0	1	0	0	0	0	0	0	0	0	0	0	0	0	0	1	0	0			-0.267261	3.74166	-0.267261	-0.267261	-0.267261	-0.267261	-0.267261	-0.267261	-0.267261	-0.267261	-0.267261	-0.267261	-0.267261	-0.267261
OG0019835	N	N	Y		0	0		NA	NA	NA	NA		NA	NA		0	0	0	0	0	0	0	0	0	0	0	0	0	0	0	2	0	0			#NUM!	#NUM!	#NUM!	#NUM!	#NUM!	#NUM!	#NUM!	#NUM!	#NUM!	#NUM!	#NUM!	#NUM!	#NUM!	#NUM!
OG0019836	N	N	Y		0	0		NA	NA	NA	NA		NA	NA		0	0	0	0	0	0	0	0	0	0	0	0	0	0	0	2	0	0			#NUM!	#NUM!	#NUM!	#NUM!	#NUM!	#NUM!	#NUM!	#NUM!	#NUM!	#NUM!	#NUM!	#NUM!	#NUM!	#NUM!
OG0019837	N	N	Y		0	0		NA	NA	NA	NA		NA	NA		0	0	0	0	0	0	0	0	0	0	0	0	0	0	0	1	0	1			#NUM!	#NUM!	#NUM!	#NUM!	#NUM!	#NUM!	#NUM!	#NUM!	#NUM!	#NUM!	#NUM!	#NUM!	#NUM!	#NUM!
OG0019838	N	N	Y		0	0		NA	NA	NA	NA		NA	NA		0	0	0	0	0	0	0	0	0	0	0	0	0	0	0	1	1	0			#NUM!	#NUM!	#NUM!	#NUM!	#NUM!	#NUM!	#NUM!	#NUM!	#NUM!	#NUM!	#NUM!	#NUM!	#NUM!	#NUM!
OG0019839	N	N	Y		0	0		NA	NA	NA	NA		NA	NA		0	0	0	0	0	0	0	0	0	0	0	0	0	0	0	1	1	0			#NUM!	#NUM!	#NUM!	#NUM!	#NUM!	#NUM!	#NUM!	#NUM!	#NUM!	#NUM!	#NUM!	#NUM!	#NUM!	#NUM!
OG0019840	N	N	Y		0	0		NA	NA	NA	NA		NA	NA		0	0	0	0	1	0	0	0	0	0	0	0	0	0	0	1	0	0			-0.267261	-0.267261	-0.267261	-0.267261	3.74166	-0.267261	-0.267261	-0.267261	-0.267261	-0.267261	-0.267261	-0.267261	-0.267261	-0.267261
OG0019841	N	N	Y		0	0		NA	NA	NA	NA		NA	NA		0	0	0	0	0	0	0	0	0	0	0	0	0	0	0	2	0	0			#NUM!	#NUM!	#NUM!	#NUM!	#NUM!	#NUM!	#NUM!	#NUM!	#NUM!	#NUM!	#NUM!	#NUM!	#NUM!	#NUM!
OG0019842	N	N	Y		0	0		NA	NA	NA	NA		NA	NA		0	0	0	0	0	0	0	0	0	0	0	0	0	0	0	1	1	0			#NUM!	#NUM!	#NUM!	#NUM!	#NUM!	#NUM!	#NUM!	#NUM!	#NUM!	#NUM!	#NUM!	#NUM!	#NUM!	#NUM!
OG0019843	N	N	Y		0	0		NA	NA	NA	NA		NA	NA		0	1	0	0	0	0	0	0	0	0	0	0	0	0	0	1	0	0			-0.267261	3.74166	-0.267261	-0.267261	-0.267261	-0.267261	-0.267261	-0.267261	-0.267261	-0.267261	-0.267261	-0.267261	-0.267261	-0.267261
OG0019844	N	N	Y		0	0		NA	NA	NA	NA		NA	NA		0	0	0	0	0	1	0	0	0	0	0	0	0	0	0	1	0	0			-0.267261	-0.267261	-0.267261	-0.267261	-0.267261	3.74166	-0.267261	-0.267261	-0.267261	-0.267261	-0.267261	-0.267261	-0.267261	-0.267261
OG0019845	N	N	Y		0	0		NA	NA	NA	NA		NA	NA		0	0	1	0	0	0	0	0	0	0	0	0	0	0	0	1	0	0			-0.267261	-0.267261	3.74166	-0.267261	-0.267261	-0.267261	-0.267261	-0.267261	-0.267261	-0.267261	-0.267261	-0.267261	-0.267261	-0.267261
OG0019846	N	N	Y		0	0		NA	NA	NA	NA		NA	NA		0	0	0	0	0	0	0	0	0	0	0	0	0	0	0	1	1	0			#NUM!	#NUM!	#NUM!	#NUM!	#NUM!	#NUM!	#NUM!	#NUM!	#NUM!	#NUM!	#NUM!	#NUM!	#NUM!	#NUM!
OG0019847	N	N	Y		0	0		NA	NA	NA	NA		NA	NA		0	0	0	0	0	0	0	0	0	1	0	0	0	0	0	1	0	0			-0.267261	-0.267261	-0.267261	-0.267261	-0.267261	-0.267261	-0.267261	-0.267261	-0.267261	3.74166	-0.267261	-0.267261	-0.267261	-0.267261
OG0019848	N	N	Y		0	0		NA	NA	NA	NA		NA	NA		0	1	0	0	0	0	0	0	0	0	0	0	0	0	0	1	0	0			-0.267261	3.74166	-0.267261	-0.267261	-0.267261	-0.267261	-0.267261	-0.267261	-0.267261	-0.267261	-0.267261	-0.267261	-0.267261	-0.267261
OG0019849	N	N	Y		0	0		NA	NA	NA	NA		NA	NA		0	0	1	0	0	0	0	0	0	0	0	0	0	0	0	1	0	0			-0.267261	-0.267261	3.74166	-0.267261	-0.267261	-0.267261	-0.267261	-0.267261	-0.267261	-0.267261	-0.267261	-0.267261	-0.267261	-0.267261
OG0019850	N	N	Y		0	0		NA	NA	NA	NA		NA	NA		0	0	0	0	0	0	0	1	0	0	0	0	0	0	0	1	0	0			-0.267261	-0.267261	-0.267261	-0.267261	-0.267261	-0.267261	-0.267261	3.74166	-0.267261	-0.267261	-0.267261	-0.267261	-0.267261	-0.267261
OG0019851	N	N	Y		0	0		NA	NA	NA	NA		NA	NA		0	0	0	0	1	0	0	0	0	0	0	0	0	0	0	1	0	0			-0.267261	-0.267261	-0.267261	-0.267261	3.74166	-0.267261	-0.267261	-0.267261	-0.267261	-0.267261	-0.267261	-0.267261	-0.267261	-0.267261
OG0019852	N	N	Y		0	0		NA	NA	NA	NA		NA	NA		0	0	1	0	0	0	0	0	0	0	0	0	0	0	0	1	0	0			-0.267261	-0.267261	3.74166	-0.267261	-0.267261	-0.267261	-0.267261	-0.267261	-0.267261	-0.267261	-0.267261	-0.267261	-0.267261	-0.267261
OG0019853	N	N	Y		0	0		NA	NA	NA	NA		NA	NA		0	0	0	0	0	0	0	0	0	0	0	0	0	0	0	1	1	0			#NUM!	#NUM!	#NUM!	#NUM!	#NUM!	#NUM!	#NUM!	#NUM!	#NUM!	#NUM!	#NUM!	#NUM!	#NUM!	#NUM!
OG0019855	N	N	Y		0	0		NA	NA	NA	NA		NA	NA		0	0	2	0	0	0	0	0	0	0	0	0	0	0	0	0	0	0			-0.267261	-0.267261	3.74166	-0.267261	-0.267261	-0.267261	-0.267261	-0.267261	-0.267261	-0.267261	-0.267261	-0.267261	-0.267261	-0.267261
OG0019858	N	N	Y		0	0		NA	NA	NA	NA		NA	NA		0	0	2	0	0	0	0	0	0	0	0	0	0	0	0	0	0	0			-0.267261	-0.267261	3.74166	-0.267261	-0.267261	-0.267261	-0.267261	-0.267261	-0.267261	-0.267261	-0.267261	-0.267261	-0.267261	-0.267261
OG0019861	N	N	Y		0	0		NA	NA	NA	NA		NA	NA		0	0	2	0	0	0	0	0	0	0	0	0	0	0	0	0	0	0			-0.267261	-0.267261	3.74166	-0.267261	-0.267261	-0.267261	-0.267261	-0.267261	-0.267261	-0.267261	-0.267261	-0.267261	-0.267261	-0.267261
OG0019887	N	N	Y		0	0		NA	NA	NA	NA		NA	NA		0	0	1	0	0	0	0	0	0	0	0	0	0	0	0	0	0	1			-0.267261	-0.267261	3.74166	-0.267261	-0.267261	-0.267261	-0.267261	-0.267261	-0.267261	-0.267261	-0.267261	-0.267261	-0.267261	-0.267261
OG0019894	N	N	Y		0	0		NA	NA	NA	NA		NA	NA		0	0	2	0	0	0	0	0	0	0	0	0	0	0	0	0	0	0			-0.267261	-0.267261	3.74166	-0.267261	-0.267261	-0.267261	-0.267261	-0.267261	-0.267261	-0.267261	-0.267261	-0.267261	-0.267261	-0.267261
OG0019896	N	N	Y		0	0		NA	NA	NA	NA		NA	NA		0	0	2	0	0	0	0	0	0	0	0	0	0	0	0	0	0	0			-0.267261	-0.267261	3.74166	-0.267261	-0.267261	-0.267261	-0.267261	-0.267261	-0.267261	-0.267261	-0.267261	-0.267261	-0.267261	-0.267261
OG0019898	N	N	Y		0	0		NA	NA	NA	NA		NA	NA		0	0	2	0	0	0	0	0	0	0	0	0	0	0	0	0	0	0			-0.267261	-0.267261	3.74166	-0.267261	-0.267261	-0.267261	-0.267261	-0.267261	-0.267261	-0.267261	-0.267261	-0.267261	-0.267261	-0.267261
OG0019899	N	N	Y		0	0		NA	NA	NA	NA		NA	NA		0	0	1	0	0	0	0	0	0	0	0	0	0	0	0	0	1	0			-0.267261	-0.267261	3.74166	-0.267261	-0.267261	-0.267261	-0.267261	-0.267261	-0.267261	-0.267261	-0.267261	-0.267261	-0.267261	-0.267261
OG0019907	N	N	Y		0	0		NA	NA	NA	NA		NA	NA		0	0	2	0	0	0	0	0	0	0	0	0	0	0	0	0	0	0			-0.267261	-0.267261	3.74166	-0.267261	-0.267261	-0.267261	-0.267261	-0.267261	-0.267261	-0.267261	-0.267261	-0.267261	-0.267261	-0.267261
OG0019908	N	N	Y		0	0		NA	NA	NA	NA		NA	NA		0	0	2	0	0	0	0	0	0	0	0	0	0	0	0	0	0	0			-0.267261	-0.267261	3.74166	-0.267261	-0.267261	-0.267261	-0.267261	-0.267261	-0.267261	-0.267261	-0.267261	-0.267261	-0.267261	-0.267261
OG0019909	N	N	Y		0	0		NA	NA	NA	NA		NA	NA		0	0	2	0	0	0	0	0	0	0	0	0	0	0	0	0	0	0			-0.267261	-0.267261	3.74166	-0.267261	-0.267261	-0.267261	-0.267261	-0.267261	-0.267261	-0.267261	-0.267261	-0.267261	-0.267261	-0.267261
OG0019912	N	N	Y		0	0		NA	NA	NA	NA		NA	NA		0	0	2	0	0	0	0	0	0	0	0	0	0	0	0	0	0	0			-0.267261	-0.267261	3.74166	-0.267261	-0.267261	-0.267261	-0.267261	-0.267261	-0.267261	-0.267261	-0.267261	-0.267261	-0.267261	-0.267261
OG0019914	N	N	Y		0	0		NA	NA	NA	NA		NA	NA		0	0	2	0	0	0	0	0	0	0	0	0	0	0	0	0	0	0			-0.267261	-0.267261	3.74166	-0.267261	-0.267261	-0.267261	-0.267261	-0.267261	-0.267261	-0.267261	-0.267261	-0.267261	-0.267261	-0.267261
OG0019916	N	N	Y		0	0		NA	NA	NA	NA		NA	NA		0	0	2	0	0	0	0	0	0	0	0	0	0	0	0	0	0	0			-0.267261	-0.267261	3.74166	-0.267261	-0.267261	-0.267261	-0.267261	-0.267261	-0.267261	-0.267261	-0.267261	-0.267261	-0.267261	-0.267261
OG0019920	N	N	Y		0	0		NA	NA	NA	NA		NA	NA		0	0	1	0	0	0	0	0	0	0	0	0	0	0	0	0	0	1			-0.267261	-0.267261	3.74166	-0.267261	-0.267261	-0.267261	-0.267261	-0.267261	-0.267261	-0.267261	-0.267261	-0.267261	-0.267261	-0.267261
OG0019923	N	N	Y		0	0		NA	NA	NA	NA		NA	NA		0	0	2	0	0	0	0	0	0	0	0	0	0	0	0	0	0	0			-0.267261	-0.267261	3.74166	-0.267261	-0.267261	-0.267261	-0.267261	-0.267261	-0.267261	-0.267261	-0.267261	-0.267261	-0.267261	-0.267261
OG0019924	N	N	Y		0	0		NA	NA	NA	NA		NA	NA		0	0	2	0	0	0	0	0	0	0	0	0	0	0	0	0	0	0			-0.267261	-0.267261	3.74166	-0.267261	-0.267261	-0.267261	-0.267261	-0.267261	-0.267261	-0.267261	-0.267261	-0.267261	-0.267261	-0.267261
OG0019930	N	N	Y		0	0		NA	NA	NA	NA		NA	NA		0	0	2	0	0	0	0	0	0	0	0	0	0	0	0	0	0	0			-0.267261	-0.267261	3.74166	-0.267261	-0.267261	-0.267261	-0.267261	-0.267261	-0.267261	-0.267261	-0.267261	-0.267261	-0.267261	-0.267261
OG0019933	N	N	Y		0	0		NA	NA	NA	NA		NA	NA		0	0	2	0	0	0	0	0	0	0	0	0	0	0	0	0	0	0			-0.267261	-0.267261	3.74166	-0.267261	-0.267261	-0.267261	-0.267261	-0.267261	-0.267261	-0.267261	-0.267261	-0.267261	-0.267261	-0.267261
OG0019939	N	N	Y		0	0		NA	NA	NA	NA		NA	NA		0	0	2	0	0	0	0	0	0	0	0	0	0	0	0	0	0	0			-0.267261	-0.267261	3.74166	-0.267261	-0.267261	-0.267261	-0.267261	-0.267261	-0.267261	-0.267261	-0.267261	-0.267261	-0.267261	-0.267261
OG0019942	N	N	Y		0	0		NA	NA	NA	NA		NA	NA		0	0	2	0	0	0	0	0	0	0	0	0	0	0	0	0	0	0			-0.267261	-0.267261	3.74166	-0.267261	-0.267261	-0.267261	-0.267261	-0.267261	-0.267261	-0.267261	-0.267261	-0.267261	-0.267261	-0.267261
OG0019953	N	N	Y		0	0		NA	NA	NA	NA		NA	NA		0	0	2	0	0	0	0	0	0	0	0	0	0	0	0	0	0	0			-0.267261	-0.267261	3.74166	-0.267261	-0.267261	-0.267261	-0.267261	-0.267261	-0.267261	-0.267261	-0.267261	-0.267261	-0.267261	-0.267261
OG0019956	N	N	Y		0	0		NA	NA	NA	NA		NA	NA		0	0	2	0	0	0	0	0	0	0	0	0	0	0	0	0	0	0			-0.267261	-0.267261	3.74166	-0.267261	-0.267261	-0.267261	-0.267261	-0.267261	-0.267261	-0.267261	-0.267261	-0.267261	-0.267261	-0.267261
OG0019962	N	N	Y		0	0		NA	NA	NA	NA		NA	NA		0	0	1	0	0	0	0	0	0	0	0	0	0	0	0	0	1	0			-0.267261	-0.267261	3.74166	-0.267261	-0.267261	-0.267261	-0.267261	-0.267261	-0.267261	-0.267261	-0.267261	-0.267261	-0.267261	-0.267261
OG0019967	N	N	Y		0	0		NA	NA	NA	NA		NA	NA		0	0	2	0	0	0	0	0	0	0	0	0	0	0	0	0	0	0			-0.267261	-0.267261	3.74166	-0.267261	-0.267261	-0.267261	-0.267261	-0.267261	-0.267261	-0.267261	-0.267261	-0.267261	-0.267261	-0.267261
OG0019970	N	N	Y		0	0		NA	NA	NA	NA		NA	NA		0	0	2	0	0	0	0	0	0	0	0	0	0	0	0	0	0	0			-0.267261	-0.267261	3.74166	-0.267261	-0.267261	-0.267261	-0.267261	-0.267261	-0.267261	-0.267261	-0.267261	-0.267261	-0.267261	-0.267261
OG0019974	N	N	Y		0	0		NA	NA	NA	NA		NA	NA		0	0	2	0	0	0	0	0	0	0	0	0	0	0	0	0	0	0			-0.267261	-0.267261	3.74166	-0.267261	-0.267261	-0.267261	-0.267261	-0.267261	-0.267261	-0.267261	-0.267261	-0.267261	-0.267261	-0.267261
OG0019977	N	N	Y		0	0		NA	NA	NA	NA		NA	NA		0	0	2	0	0	0	0	0	0	0	0	0	0	0	0	0	0	0			-0.267261	-0.267261	3.74166	-0.267261	-0.267261	-0.267261	-0.267261	-0.267261	-0.267261	-0.267261	-0.267261	-0.267261	-0.267261	-0.267261
OG0019992	N	N	Y		0	0		NA	NA	NA	NA		NA	NA		0	0	2	0	0	0	0	0	0	0	0	0	0	0	0	0	0	0			-0.267261	-0.267261	3.74166	-0.267261	-0.267261	-0.267261	-0.267261	-0.267261	-0.267261	-0.267261	-0.267261	-0.267261	-0.267261	-0.267261
OG0020012	N	N	Y		0	0		NA	NA	NA	NA		NA	NA		0	0	2	0	0	0	0	0	0	0	0	0	0	0	0	0	0	0			-0.267261	-0.267261	3.74166	-0.267261	-0.267261	-0.267261	-0.267261	-0.267261	-0.267261	-0.267261	-0.267261	-0.267261	-0.267261	-0.267261
OG0020021	N	N	Y		0	0		NA	NA	NA	NA		NA	NA		0	0	2	0	0	0	0	0	0	0	0	0	0	0	0	0	0	0			-0.267261	-0.267261	3.74166	-0.267261	-0.267261	-0.267261	-0.267261	-0.267261	-0.267261	-0.267261	-0.267261	-0.267261	-0.267261	-0.267261
OG0020035	N	N	Y		0	0		NA	NA	NA	NA		NA	NA		0	0	2	0	0	0	0	0	0	0	0	0	0	0	0	0	0	0			-0.267261	-0.267261	3.74166	-0.267261	-0.267261	-0.267261	-0.267261	-0.267261	-0.267261	-0.267261	-0.267261	-0.267261	-0.267261	-0.267261
OG0020045	N	N	Y		0	0		NA	NA	NA	NA		NA	NA		0	0	2	0	0	0	0	0	0	0	0	0	0	0	0	0	0	0			-0.267261	-0.267261	3.74166	-0.267261	-0.267261	-0.267261	-0.267261	-0.267261	-0.267261	-0.267261	-0.267261	-0.267261	-0.267261	-0.267261
OG0020062	N	N	Y		0	0		NA	NA	NA	NA		NA	NA		0	0	2	0	0	0	0	0	0	0	0	0	0	0	0	0	0	0			-0.267261	-0.267261	3.74166	-0.267261	-0.267261	-0.267261	-0.267261	-0.267261	-0.267261	-0.267261	-0.267261	-0.267261	-0.267261	-0.267261
OG0020066	N	N	Y		0	0		NA	NA	NA	NA		NA	NA		0	0	0	0	0	0	0	0	0	0	0	2	0	0	0	0	0	0			-0.267261	-0.267261	-0.267261	-0.267261	-0.267261	-0.267261	-0.267261	-0.267261	-0.267261	-0.267261	-0.267261	3.74166	-0.267261	-0.267261
OG0020068	N	N	Y		0	0		NA	NA	NA	NA		NA	NA		0	0	0	0	0	0	0	0	0	0	0	2	0	0	0	0	0	0			-0.267261	-0.267261	-0.267261	-0.267261	-0.267261	-0.267261	-0.267261	-0.267261	-0.267261	-0.267261	-0.267261	3.74166	-0.267261	-0.267261
OG0020069	N	N	Y		0	0		NA	NA	NA	NA		NA	NA		0	0	0	0	0	0	0	0	0	0	0	2	0	0	0	0	0	0			-0.267261	-0.267261	-0.267261	-0.267261	-0.267261	-0.267261	-0.267261	-0.267261	-0.267261	-0.267261	-0.267261	3.74166	-0.267261	-0.267261
OG0020071	N	N	Y		0	0		NA	NA	NA	NA		NA	NA		0	0	0	0	0	0	0	0	0	0	0	2	0	0	0	0	0	0			-0.267261	-0.267261	-0.267261	-0.267261	-0.267261	-0.267261	-0.267261	-0.267261	-0.267261	-0.267261	-0.267261	3.74166	-0.267261	-0.267261
OG0020080	N	N	Y		0	0		NA	NA	NA	NA		NA	NA		0	0	0	0	0	0	0	0	0	0	0	2	0	0	0	0	0	0			-0.267261	-0.267261	-0.267261	-0.267261	-0.267261	-0.267261	-0.267261	-0.267261	-0.267261	-0.267261	-0.267261	3.74166	-0.267261	-0.267261
OG0020087	N	N	Y		0	0		NA	NA	NA	NA		NA	NA		0	0	0	0	0	0	0	0	0	0	0	2	0	0	0	0	0	0			-0.267261	-0.267261	-0.267261	-0.267261	-0.267261	-0.267261	-0.267261	-0.267261	-0.267261	-0.267261	-0.267261	3.74166	-0.267261	-0.267261
OG0020091	N	N	Y		0	0		NA	NA	NA	NA		NA	NA		0	0	0	0	0	0	0	0	0	0	0	2	0	0	0	0	0	0			-0.267261	-0.267261	-0.267261	-0.267261	-0.267261	-0.267261	-0.267261	-0.267261	-0.267261	-0.267261	-0.267261	3.74166	-0.267261	-0.267261
OG0020097	N	N	Y		0	0		NA	NA	NA	NA		NA	NA		0	0	0	0	0	0	0	0	0	0	0	2	0	0	0	0	0	0			-0.267261	-0.267261	-0.267261	-0.267261	-0.267261	-0.267261	-0.267261	-0.267261	-0.267261	-0.267261	-0.267261	3.74166	-0.267261	-0.267261
OG0020098	N	N	Y		0	0		NA	NA	NA	NA		NA	NA		0	0	0	0	0	0	0	0	0	0	0	2	0	0	0	0	0	0			-0.267261	-0.267261	-0.267261	-0.267261	-0.267261	-0.267261	-0.267261	-0.267261	-0.267261	-0.267261	-0.267261	3.74166	-0.267261	-0.267261
OG0020106	N	N	Y		0	0		NA	NA	NA	NA		NA	NA		0	0	0	0	0	0	0	0	0	0	0	2	0	0	0	0	0	0			-0.267261	-0.267261	-0.267261	-0.267261	-0.267261	-0.267261	-0.267261	-0.267261	-0.267261	-0.267261	-0.267261	3.74166	-0.267261	-0.267261
OG0020107	N	N	Y		0	0		NA	NA	NA	NA		NA	NA		0	0	0	0	0	0	0	0	0	0	0	2	0	0	0	0	0	0			-0.267261	-0.267261	-0.267261	-0.267261	-0.267261	-0.267261	-0.267261	-0.267261	-0.267261	-0.267261	-0.267261	3.74166	-0.267261	-0.267261
OG0020108	N	N	Y		0	0		NA	NA	NA	NA		NA	NA		0	0	0	0	0	0	0	0	0	0	0	2	0	0	0	0	0	0			-0.267261	-0.267261	-0.267261	-0.267261	-0.267261	-0.267261	-0.267261	-0.267261	-0.267261	-0.267261	-0.267261	3.74166	-0.267261	-0.267261
OG0020112	N	N	Y		0	0		NA	NA	NA	NA		NA	NA		0	0	0	0	0	0	0	0	0	0	0	2	0	0	0	0	0	0			-0.267261	-0.267261	-0.267261	-0.267261	-0.267261	-0.267261	-0.267261	-0.267261	-0.267261	-0.267261	-0.267261	3.74166	-0.267261	-0.267261
OG0020116	N	N	Y		0	0		NA	NA	NA	NA		NA	NA		0	0	0	0	0	0	0	0	0	0	0	2	0	0	0	0	0	0			-0.267261	-0.267261	-0.267261	-0.267261	-0.267261	-0.267261	-0.267261	-0.267261	-0.267261	-0.267261	-0.267261	3.74166	-0.267261	-0.267261
OG0020117	N	N	Y		0	0		NA	NA	NA	NA		NA	NA		0	0	0	0	0	0	0	0	0	0	0	1	0	0	0	0	0	1			-0.267261	-0.267261	-0.267261	-0.267261	-0.267261	-0.267261	-0.267261	-0.267261	-0.267261	-0.267261	-0.267261	3.74166	-0.267261	-0.267261
OG0020119	N	N	Y		0	0		NA	NA	NA	NA		NA	NA		0	0	0	0	0	0	0	0	0	0	0	1	0	0	0	0	1	0			-0.267261	-0.267261	-0.267261	-0.267261	-0.267261	-0.267261	-0.267261	-0.267261	-0.267261	-0.267261	-0.267261	3.74166	-0.267261	-0.267261
OG0020121	N	N	Y		0	0		NA	NA	NA	NA		NA	NA		0	0	0	0	0	0	0	0	0	0	0	2	0	0	0	0	0	0			-0.267261	-0.267261	-0.267261	-0.267261	-0.267261	-0.267261	-0.267261	-0.267261	-0.267261	-0.267261	-0.267261	3.74166	-0.267261	-0.267261
OG0020126	N	N	Y		0	0		NA	NA	NA	NA		NA	NA		0	0	0	0	0	0	0	0	0	0	0	2	0	0	0	0	0	0			-0.267261	-0.267261	-0.267261	-0.267261	-0.267261	-0.267261	-0.267261	-0.267261	-0.267261	-0.267261	-0.267261	3.74166	-0.267261	-0.267261
OG0020152	N	N	Y		0	0		NA	NA	NA	NA		NA	NA		0	0	0	0	0	0	0	0	0	0	0	2	0	0	0	0	0	0			-0.267261	-0.267261	-0.267261	-0.267261	-0.267261	-0.267261	-0.267261	-0.267261	-0.267261	-0.267261	-0.267261	3.74166	-0.267261	-0.267261
OG0020156	N	N	Y		0	0		NA	NA	NA	NA		NA	NA		0	0	0	0	0	0	0	0	0	0	0	2	0	0	0	0	0	0			-0.267261	-0.267261	-0.267261	-0.267261	-0.267261	-0.267261	-0.267261	-0.267261	-0.267261	-0.267261	-0.267261	3.74166	-0.267261	-0.267261
OG0020162	N	N	Y		0	0		NA	NA	NA	NA		NA	NA		0	0	0	0	0	0	0	0	0	0	0	2	0	0	0	0	0	0			-0.267261	-0.267261	-0.267261	-0.267261	-0.267261	-0.267261	-0.267261	-0.267261	-0.267261	-0.267261	-0.267261	3.74166	-0.267261	-0.267261
OG0020176	N	N	Y		0	0		NA	NA	NA	NA		NA	NA		0	0	0	0	0	0	0	0	0	2	0	0	0	0	0	0	0	0			-0.267261	-0.267261	-0.267261	-0.267261	-0.267261	-0.267261	-0.267261	-0.267261	-0.267261	3.74166	-0.267261	-0.267261	-0.267261	-0.267261
OG0020178	N	N	Y		0	0		NA	NA	NA	NA		NA	NA		0	0	0	0	0	0	0	0	0	1	0	0	0	0	0	0	0	1			-0.267261	-0.267261	-0.267261	-0.267261	-0.267261	-0.267261	-0.267261	-0.267261	-0.267261	3.74166	-0.267261	-0.267261	-0.267261	-0.267261
OG0020180	N	N	Y		0	0		NA	NA	NA	NA		NA	NA		0	0	0	0	0	0	0	0	0	1	0	0	0	0	0	0	1	0			-0.267261	-0.267261	-0.267261	-0.267261	-0.267261	-0.267261	-0.267261	-0.267261	-0.267261	3.74166	-0.267261	-0.267261	-0.267261	-0.267261
OG0020181	N	N	Y		0	0		NA	NA	NA	NA		NA	NA		0	0	0	0	0	0	0	0	0	1	0	0	0	0	0	0	1	0			-0.267261	-0.267261	-0.267261	-0.267261	-0.267261	-0.267261	-0.267261	-0.267261	-0.267261	3.74166	-0.267261	-0.267261	-0.267261	-0.267261
OG0020183	N	N	Y		0	0		NA	NA	NA	NA		NA	NA		0	0	0	0	0	0	0	0	0	1	0	0	0	0	0	0	1	0			-0.267261	-0.267261	-0.267261	-0.267261	-0.267261	-0.267261	-0.267261	-0.267261	-0.267261	3.74166	-0.267261	-0.267261	-0.267261	-0.267261
OG0020184	N	N	Y		0	0		NA	NA	NA	NA		NA	NA		0	0	0	0	0	0	0	0	0	1	0	0	0	0	0	0	1	0			-0.267261	-0.267261	-0.267261	-0.267261	-0.267261	-0.267261	-0.267261	-0.267261	-0.267261	3.74166	-0.267261	-0.267261	-0.267261	-0.267261
OG0020185	N	N	Y		0	0		NA	NA	NA	NA		NA	NA		0	0	0	0	0	0	0	0	0	1	0	0	0	0	0	0	1	0			-0.267261	-0.267261	-0.267261	-0.267261	-0.267261	-0.267261	-0.267261	-0.267261	-0.267261	3.74166	-0.267261	-0.267261	-0.267261	-0.267261
OG0020189	N	N	Y		0	0		NA	NA	NA	NA		NA	NA		0	0	0	0	0	0	0	0	0	1	0	0	0	0	0	0	1	0			-0.267261	-0.267261	-0.267261	-0.267261	-0.267261	-0.267261	-0.267261	-0.267261	-0.267261	3.74166	-0.267261	-0.267261	-0.267261	-0.267261
OG0020194	N	N	Y		0	0		NA	NA	NA	NA		NA	NA		0	0	0	0	0	0	0	0	0	1	0	0	0	0	0	0	0	1			-0.267261	-0.267261	-0.267261	-0.267261	-0.267261	-0.267261	-0.267261	-0.267261	-0.267261	3.74166	-0.267261	-0.267261	-0.267261	-0.267261
OG0020195	N	N	Y		0	0		NA	NA	NA	NA		NA	NA		0	0	0	0	0	0	0	0	0	1	0	0	0	0	0	0	1	0			-0.267261	-0.267261	-0.267261	-0.267261	-0.267261	-0.267261	-0.267261	-0.267261	-0.267261	3.74166	-0.267261	-0.267261	-0.267261	-0.267261
OG0020196	N	N	Y		0	0		NA	NA	NA	NA		NA	NA		0	0	0	0	0	0	0	0	0	2	0	0	0	0	0	0	0	0			-0.267261	-0.267261	-0.267261	-0.267261	-0.267261	-0.267261	-0.267261	-0.267261	-0.267261	3.74166	-0.267261	-0.267261	-0.267261	-0.267261
OG0020198	N	N	Y		0	0		NA	NA	NA	NA		NA	NA		0	0	0	0	0	0	0	0	0	1	0	0	0	0	0	0	1	0			-0.267261	-0.267261	-0.267261	-0.267261	-0.267261	-0.267261	-0.267261	-0.267261	-0.267261	3.74166	-0.267261	-0.267261	-0.267261	-0.267261
OG0020199	N	N	Y		0	0		NA	NA	NA	NA		NA	NA		0	0	0	0	0	0	0	0	0	2	0	0	0	0	0	0	0	0			-0.267261	-0.267261	-0.267261	-0.267261	-0.267261	-0.267261	-0.267261	-0.267261	-0.267261	3.74166	-0.267261	-0.267261	-0.267261	-0.267261
OG0020200	N	N	Y		0	0		NA	NA	NA	NA		NA	NA		0	0	0	0	0	0	0	0	0	1	0	0	0	0	0	0	0	1			-0.267261	-0.267261	-0.267261	-0.267261	-0.267261	-0.267261	-0.267261	-0.267261	-0.267261	3.74166	-0.267261	-0.267261	-0.267261	-0.267261
OG0020201	N	N	Y		0	0		NA	NA	NA	NA		NA	NA		0	0	0	0	0	0	0	0	0	2	0	0	0	0	0	0	0	0			-0.267261	-0.267261	-0.267261	-0.267261	-0.267261	-0.267261	-0.267261	-0.267261	-0.267261	3.74166	-0.267261	-0.267261	-0.267261	-0.267261
OG0020204	N	N	Y		0	0		NA	NA	NA	NA		NA	NA		0	0	0	0	0	0	0	0	0	2	0	0	0	0	0	0	0	0			-0.267261	-0.267261	-0.267261	-0.267261	-0.267261	-0.267261	-0.267261	-0.267261	-0.267261	3.74166	-0.267261	-0.267261	-0.267261	-0.267261
OG0020205	N	N	Y		0	0		NA	NA	NA	NA		NA	NA		0	0	0	0	0	0	0	0	0	1	0	0	0	0	0	0	1	0			-0.267261	-0.267261	-0.267261	-0.267261	-0.267261	-0.267261	-0.267261	-0.267261	-0.267261	3.74166	-0.267261	-0.267261	-0.267261	-0.267261
OG0020206	N	N	Y		0	0		NA	NA	NA	NA		NA	NA		0	0	0	0	0	0	0	0	0	2	0	0	0	0	0	0	0	0			-0.267261	-0.267261	-0.267261	-0.267261	-0.267261	-0.267261	-0.267261	-0.267261	-0.267261	3.74166	-0.267261	-0.267261	-0.267261	-0.267261
OG0020209	N	N	Y		0	0		NA	NA	NA	NA		NA	NA		0	0	0	0	0	0	0	0	0	2	0	0	0	0	0	0	0	0			-0.267261	-0.267261	-0.267261	-0.267261	-0.267261	-0.267261	-0.267261	-0.267261	-0.267261	3.74166	-0.267261	-0.267261	-0.267261	-0.267261
OG0020211	N	N	Y		0	0		NA	NA	NA	NA		NA	NA		0	0	0	0	0	0	0	0	0	1	0	0	0	0	0	0	1	0			-0.267261	-0.267261	-0.267261	-0.267261	-0.267261	-0.267261	-0.267261	-0.267261	-0.267261	3.74166	-0.267261	-0.267261	-0.267261	-0.267261
OG0020212	N	N	Y		0	0		NA	NA	NA	NA		NA	NA		0	0	0	0	0	0	0	0	0	2	0	0	0	0	0	0	0	0			-0.267261	-0.267261	-0.267261	-0.267261	-0.267261	-0.267261	-0.267261	-0.267261	-0.267261	3.74166	-0.267261	-0.267261	-0.267261	-0.267261
OG0020213	N	N	Y		0	0		NA	NA	NA	NA		NA	NA		0	0	0	0	0	0	0	0	0	2	0	0	0	0	0	0	0	0			-0.267261	-0.267261	-0.267261	-0.267261	-0.267261	-0.267261	-0.267261	-0.267261	-0.267261	3.74166	-0.267261	-0.267261	-0.267261	-0.267261
OG0020217	N	N	Y		0	0		NA	NA	NA	NA		NA	NA		0	0	0	0	0	0	0	0	0	2	0	0	0	0	0	0	0	0			-0.267261	-0.267261	-0.267261	-0.267261	-0.267261	-0.267261	-0.267261	-0.267261	-0.267261	3.74166	-0.267261	-0.267261	-0.267261	-0.267261
OG0020221	N	N	Y		0	0		NA	NA	NA	NA		NA	NA		0	0	0	0	0	0	0	0	0	2	0	0	0	0	0	0	0	0			-0.267261	-0.267261	-0.267261	-0.267261	-0.267261	-0.267261	-0.267261	-0.267261	-0.267261	3.74166	-0.267261	-0.267261	-0.267261	-0.267261
OG0020223	N	N	Y		0	0		NA	NA	NA	NA		NA	NA		0	0	0	0	0	0	0	0	0	1	0	0	0	0	0	0	1	0			-0.267261	-0.267261	-0.267261	-0.267261	-0.267261	-0.267261	-0.267261	-0.267261	-0.267261	3.74166	-0.267261	-0.267261	-0.267261	-0.267261
OG0020227	N	N	Y		0	0		NA	NA	NA	NA		NA	NA		0	0	0	0	0	0	0	0	0	2	0	0	0	0	0	0	0	0			-0.267261	-0.267261	-0.267261	-0.267261	-0.267261	-0.267261	-0.267261	-0.267261	-0.267261	3.74166	-0.267261	-0.267261	-0.267261	-0.267261
OG0020228	N	N	Y		0	0		NA	NA	NA	NA		NA	NA		0	0	0	0	0	0	0	0	0	1	0	0	0	0	0	0	1	0			-0.267261	-0.267261	-0.267261	-0.267261	-0.267261	-0.267261	-0.267261	-0.267261	-0.267261	3.74166	-0.267261	-0.267261	-0.267261	-0.267261
OG0020229	N	N	Y		0	0		NA	NA	NA	NA		NA	NA		0	0	0	0	0	0	0	0	0	2	0	0	0	0	0	0	0	0			-0.267261	-0.267261	-0.267261	-0.267261	-0.267261	-0.267261	-0.267261	-0.267261	-0.267261	3.74166	-0.267261	-0.267261	-0.267261	-0.267261
OG0020232	N	N	Y		0	0		NA	NA	NA	NA		NA	NA		0	0	0	0	0	0	0	0	0	2	0	0	0	0	0	0	0	0			-0.267261	-0.267261	-0.267261	-0.267261	-0.267261	-0.267261	-0.267261	-0.267261	-0.267261	3.74166	-0.267261	-0.267261	-0.267261	-0.267261
OG0020234	N	N	Y		0	0		NA	NA	NA	NA		NA	NA		0	0	0	0	0	0	0	0	0	1	0	0	0	0	0	0	0	1			-0.267261	-0.267261	-0.267261	-0.267261	-0.267261	-0.267261	-0.267261	-0.267261	-0.267261	3.74166	-0.267261	-0.267261	-0.267261	-0.267261
OG0020235	N	N	Y		0	0		NA	NA	NA	NA		NA	NA		0	0	0	0	0	0	0	0	0	1	0	0	0	0	0	0	1	0			-0.267261	-0.267261	-0.267261	-0.267261	-0.267261	-0.267261	-0.267261	-0.267261	-0.267261	3.74166	-0.267261	-0.267261	-0.267261	-0.267261
OG0020239	N	N	Y		0	0		NA	NA	NA	NA		NA	NA		0	0	0	0	0	0	0	0	0	1	0	0	0	0	0	0	1	0			-0.267261	-0.267261	-0.267261	-0.267261	-0.267261	-0.267261	-0.267261	-0.267261	-0.267261	3.74166	-0.267261	-0.267261	-0.267261	-0.267261
OG0020241	N	N	Y		0	0		NA	NA	NA	NA		NA	NA		0	0	0	0	0	0	0	0	0	1	0	0	0	0	0	0	1	0			-0.267261	-0.267261	-0.267261	-0.267261	-0.267261	-0.267261	-0.267261	-0.267261	-0.267261	3.74166	-0.267261	-0.267261	-0.267261	-0.267261
OG0020244	N	N	Y		0	0		NA	NA	NA	NA		NA	NA		0	0	0	0	0	0	0	0	0	1	0	0	0	0	0	0	1	0			-0.267261	-0.267261	-0.267261	-0.267261	-0.267261	-0.267261	-0.267261	-0.267261	-0.267261	3.74166	-0.267261	-0.267261	-0.267261	-0.267261
OG0020245	N	N	Y		0	0		NA	NA	NA	NA		NA	NA		0	0	0	0	0	0	0	0	0	1	0	0	0	0	0	0	1	0			-0.267261	-0.267261	-0.267261	-0.267261	-0.267261	-0.267261	-0.267261	-0.267261	-0.267261	3.74166	-0.267261	-0.267261	-0.267261	-0.267261
OG0020246	N	N	Y		0	0		NA	NA	NA	NA		NA	NA		0	0	0	0	0	0	0	0	0	2	0	0	0	0	0	0	0	0			-0.267261	-0.267261	-0.267261	-0.267261	-0.267261	-0.267261	-0.267261	-0.267261	-0.267261	3.74166	-0.267261	-0.267261	-0.267261	-0.267261
OG0020251	N	N	Y		0	0		NA	NA	NA	NA		NA	NA		0	0	0	0	0	0	0	0	0	1	0	0	0	0	0	0	1	0			-0.267261	-0.267261	-0.267261	-0.267261	-0.267261	-0.267261	-0.267261	-0.267261	-0.267261	3.74166	-0.267261	-0.267261	-0.267261	-0.267261
OG0020252	N	N	Y		0	0		NA	NA	NA	NA		NA	NA		0	0	0	0	0	0	0	0	0	2	0	0	0	0	0	0	0	0			-0.267261	-0.267261	-0.267261	-0.267261	-0.267261	-0.267261	-0.267261	-0.267261	-0.267261	3.74166	-0.267261	-0.267261	-0.267261	-0.267261
OG0020253	N	N	Y		0	0		NA	NA	NA	NA		NA	NA		0	0	0	0	0	0	0	0	0	1	0	0	0	0	0	0	1	0			-0.267261	-0.267261	-0.267261	-0.267261	-0.267261	-0.267261	-0.267261	-0.267261	-0.267261	3.74166	-0.267261	-0.267261	-0.267261	-0.267261
OG0020257	N	N	Y		0	0		NA	NA	NA	NA		NA	NA		0	0	0	0	0	0	0	0	0	1	0	0	0	0	0	0	1	0			-0.267261	-0.267261	-0.267261	-0.267261	-0.267261	-0.267261	-0.267261	-0.267261	-0.267261	3.74166	-0.267261	-0.267261	-0.267261	-0.267261
OG0020259	N	N	Y		0	0		NA	NA	NA	NA		NA	NA		0	0	0	0	0	0	0	0	0	2	0	0	0	0	0	0	0	0			-0.267261	-0.267261	-0.267261	-0.267261	-0.267261	-0.267261	-0.267261	-0.267261	-0.267261	3.74166	-0.267261	-0.267261	-0.267261	-0.267261
OG0020264	N	N	Y		0	0		NA	NA	NA	NA		NA	NA		0	0	0	0	0	0	0	0	0	1	0	0	0	0	0	0	1	0			-0.267261	-0.267261	-0.267261	-0.267261	-0.267261	-0.267261	-0.267261	-0.267261	-0.267261	3.74166	-0.267261	-0.267261	-0.267261	-0.267261
OG0020265	N	N	Y		0	0		NA	NA	NA	NA		NA	NA		0	0	0	0	0	0	0	0	0	1	0	0	0	0	0	0	1	0			-0.267261	-0.267261	-0.267261	-0.267261	-0.267261	-0.267261	-0.267261	-0.267261	-0.267261	3.74166	-0.267261	-0.267261	-0.267261	-0.267261
OG0020266	N	N	Y		0	0		NA	NA	NA	NA		NA	NA		0	0	0	0	0	0	0	0	0	2	0	0	0	0	0	0	0	0			-0.267261	-0.267261	-0.267261	-0.267261	-0.267261	-0.267261	-0.267261	-0.267261	-0.267261	3.74166	-0.267261	-0.267261	-0.267261	-0.267261
OG0020267	N	N	Y		0	0		NA	NA	NA	NA		NA	NA		0	0	0	0	0	0	0	0	0	1	0	0	0	0	0	0	1	0			-0.267261	-0.267261	-0.267261	-0.267261	-0.267261	-0.267261	-0.267261	-0.267261	-0.267261	3.74166	-0.267261	-0.267261	-0.267261	-0.267261
OG0020270	N	N	Y		0	0		NA	NA	NA	NA		NA	NA		0	0	0	0	0	0	0	0	0	1	0	0	0	0	0	0	1	0			-0.267261	-0.267261	-0.267261	-0.267261	-0.267261	-0.267261	-0.267261	-0.267261	-0.267261	3.74166	-0.267261	-0.267261	-0.267261	-0.267261
OG0020274	N	N	Y		0	0		NA	NA	NA	NA		NA	NA		0	0	0	0	0	0	0	0	0	1	0	0	0	0	0	0	1	0			-0.267261	-0.267261	-0.267261	-0.267261	-0.267261	-0.267261	-0.267261	-0.267261	-0.267261	3.74166	-0.267261	-0.267261	-0.267261	-0.267261
OG0020275	N	N	Y		0	0		NA	NA	NA	NA		NA	NA		0	0	0	0	0	0	0	0	0	1	0	0	0	0	0	0	1	0			-0.267261	-0.267261	-0.267261	-0.267261	-0.267261	-0.267261	-0.267261	-0.267261	-0.267261	3.74166	-0.267261	-0.267261	-0.267261	-0.267261
OG0020276	N	N	Y		0	0		NA	NA	NA	NA		NA	NA		0	0	0	0	0	0	0	0	0	2	0	0	0	0	0	0	0	0			-0.267261	-0.267261	-0.267261	-0.267261	-0.267261	-0.267261	-0.267261	-0.267261	-0.267261	3.74166	-0.267261	-0.267261	-0.267261	-0.267261
OG0020277	N	N	Y		0	0		NA	NA	NA	NA		NA	NA		0	0	0	0	0	0	0	0	0	2	0	0	0	0	0	0	0	0			-0.267261	-0.267261	-0.267261	-0.267261	-0.267261	-0.267261	-0.267261	-0.267261	-0.267261	3.74166	-0.267261	-0.267261	-0.267261	-0.267261
OG0020278	N	N	Y		0	0		NA	NA	NA	NA		NA	NA		0	0	0	0	0	0	0	0	0	2	0	0	0	0	0	0	0	0			-0.267261	-0.267261	-0.267261	-0.267261	-0.267261	-0.267261	-0.267261	-0.267261	-0.267261	3.74166	-0.267261	-0.267261	-0.267261	-0.267261
OG0020279	N	N	Y		0	0		NA	NA	NA	NA		NA	NA		0	0	0	0	0	0	0	0	0	1	0	0	0	0	0	0	1	0			-0.267261	-0.267261	-0.267261	-0.267261	-0.267261	-0.267261	-0.267261	-0.267261	-0.267261	3.74166	-0.267261	-0.267261	-0.267261	-0.267261
OG0020280	N	N	Y		0	0		NA	NA	NA	NA		NA	NA		0	0	0	0	0	0	0	0	0	2	0	0	0	0	0	0	0	0			-0.267261	-0.267261	-0.267261	-0.267261	-0.267261	-0.267261	-0.267261	-0.267261	-0.267261	3.74166	-0.267261	-0.267261	-0.267261	-0.267261
OG0020281	N	N	Y		0	0		NA	NA	NA	NA		NA	NA		0	0	0	0	0	0	0	0	0	2	0	0	0	0	0	0	0	0			-0.267261	-0.267261	-0.267261	-0.267261	-0.267261	-0.267261	-0.267261	-0.267261	-0.267261	3.74166	-0.267261	-0.267261	-0.267261	-0.267261
OG0020283	N	N	Y		0	0		NA	NA	NA	NA		NA	NA		0	0	0	0	0	0	0	0	0	2	0	0	0	0	0	0	0	0			-0.267261	-0.267261	-0.267261	-0.267261	-0.267261	-0.267261	-0.267261	-0.267261	-0.267261	3.74166	-0.267261	-0.267261	-0.267261	-0.267261
OG0020288	N	N	Y		0	0		NA	NA	NA	NA		NA	NA		0	0	0	0	0	0	0	0	0	2	0	0	0	0	0	0	0	0			-0.267261	-0.267261	-0.267261	-0.267261	-0.267261	-0.267261	-0.267261	-0.267261	-0.267261	3.74166	-0.267261	-0.267261	-0.267261	-0.267261
OG0020289	N	N	Y		0	0		NA	NA	NA	NA		NA	NA		0	0	0	0	0	0	0	0	0	1	0	0	0	0	0	0	0	1			-0.267261	-0.267261	-0.267261	-0.267261	-0.267261	-0.267261	-0.267261	-0.267261	-0.267261	3.74166	-0.267261	-0.267261	-0.267261	-0.267261
OG0020292	N	N	Y		0	0		NA	NA	NA	NA		NA	NA		0	0	0	0	0	0	0	0	0	1	0	0	0	0	0	0	1	0			-0.267261	-0.267261	-0.267261	-0.267261	-0.267261	-0.267261	-0.267261	-0.267261	-0.267261	3.74166	-0.267261	-0.267261	-0.267261	-0.267261
OG0020294	N	N	Y		0	0		NA	NA	NA	NA		NA	NA		0	0	0	0	0	0	0	0	0	2	0	0	0	0	0	0	0	0			-0.267261	-0.267261	-0.267261	-0.267261	-0.267261	-0.267261	-0.267261	-0.267261	-0.267261	3.74166	-0.267261	-0.267261	-0.267261	-0.267261
OG0020296	N	N	Y		0	0		NA	NA	NA	NA		NA	NA		0	0	0	0	0	0	0	0	0	2	0	0	0	0	0	0	0	0			-0.267261	-0.267261	-0.267261	-0.267261	-0.267261	-0.267261	-0.267261	-0.267261	-0.267261	3.74166	-0.267261	-0.267261	-0.267261	-0.267261
OG0020299	N	N	Y		0	0		NA	NA	NA	NA		NA	NA		0	0	0	0	0	0	0	0	0	1	0	0	0	0	0	0	1	0			-0.267261	-0.267261	-0.267261	-0.267261	-0.267261	-0.267261	-0.267261	-0.267261	-0.267261	3.74166	-0.267261	-0.267261	-0.267261	-0.267261
OG0020300	N	N	Y		0	0		NA	NA	NA	NA		NA	NA		0	0	0	0	0	0	0	0	0	2	0	0	0	0	0	0	0	0			-0.267261	-0.267261	-0.267261	-0.267261	-0.267261	-0.267261	-0.267261	-0.267261	-0.267261	3.74166	-0.267261	-0.267261	-0.267261	-0.267261
OG0020303	N	N	Y		0	0		NA	NA	NA	NA		NA	NA		0	0	0	0	0	0	0	0	0	2	0	0	0	0	0	0	0	0			-0.267261	-0.267261	-0.267261	-0.267261	-0.267261	-0.267261	-0.267261	-0.267261	-0.267261	3.74166	-0.267261	-0.267261	-0.267261	-0.267261
OG0020304	N	N	Y		0	0		NA	NA	NA	NA		NA	NA		0	0	0	0	0	0	0	0	0	2	0	0	0	0	0	0	0	0			-0.267261	-0.267261	-0.267261	-0.267261	-0.267261	-0.267261	-0.267261	-0.267261	-0.267261	3.74166	-0.267261	-0.267261	-0.267261	-0.267261
OG0020305	N	N	Y		0	0		NA	NA	NA	NA		NA	NA		0	0	0	0	0	0	0	0	0	1	0	0	0	0	0	0	1	0			-0.267261	-0.267261	-0.267261	-0.267261	-0.267261	-0.267261	-0.267261	-0.267261	-0.267261	3.74166	-0.267261	-0.267261	-0.267261	-0.267261
OG0020311	N	N	Y		0	0		NA	NA	NA	NA		NA	NA		0	0	0	0	0	0	0	0	0	2	0	0	0	0	0	0	0	0			-0.267261	-0.267261	-0.267261	-0.267261	-0.267261	-0.267261	-0.267261	-0.267261	-0.267261	3.74166	-0.267261	-0.267261	-0.267261	-0.267261
OG0020314	N	N	Y		0	0		NA	NA	NA	NA		NA	NA		0	0	0	0	0	0	0	0	0	1	0	0	0	0	0	0	1	0			-0.267261	-0.267261	-0.267261	-0.267261	-0.267261	-0.267261	-0.267261	-0.267261	-0.267261	3.74166	-0.267261	-0.267261	-0.267261	-0.267261
OG0020319	N	N	Y		0	0		NA	NA	NA	NA		NA	NA		0	0	0	0	0	0	0	0	0	2	0	0	0	0	0	0	0	0			-0.267261	-0.267261	-0.267261	-0.267261	-0.267261	-0.267261	-0.267261	-0.267261	-0.267261	3.74166	-0.267261	-0.267261	-0.267261	-0.267261
OG0020325	N	N	Y		0	0		NA	NA	NA	NA		NA	NA		0	0	0	0	0	0	0	0	0	1	0	0	0	0	0	0	0	1			-0.267261	-0.267261	-0.267261	-0.267261	-0.267261	-0.267261	-0.267261	-0.267261	-0.267261	3.74166	-0.267261	-0.267261	-0.267261	-0.267261
OG0020329	N	N	Y		0	0		NA	NA	NA	NA		NA	NA		0	0	0	0	0	0	0	0	0	1	0	0	0	0	0	0	1	0			-0.267261	-0.267261	-0.267261	-0.267261	-0.267261	-0.267261	-0.267261	-0.267261	-0.267261	3.74166	-0.267261	-0.267261	-0.267261	-0.267261
OG0020334	N	N	Y		0	0		NA	NA	NA	NA		NA	NA		0	0	0	0	0	0	0	0	0	1	0	0	0	0	0	0	1	0			-0.267261	-0.267261	-0.267261	-0.267261	-0.267261	-0.267261	-0.267261	-0.267261	-0.267261	3.74166	-0.267261	-0.267261	-0.267261	-0.267261
OG0020339	N	N	Y		0	0		NA	NA	NA	NA		NA	NA		0	0	0	0	0	0	0	0	0	1	0	0	0	0	0	0	1	0			-0.267261	-0.267261	-0.267261	-0.267261	-0.267261	-0.267261	-0.267261	-0.267261	-0.267261	3.74166	-0.267261	-0.267261	-0.267261	-0.267261
OG0020344	N	N	Y		0	0		NA	NA	NA	NA		NA	NA		0	0	0	0	0	0	0	0	0	1	0	0	0	0	0	0	1	0			-0.267261	-0.267261	-0.267261	-0.267261	-0.267261	-0.267261	-0.267261	-0.267261	-0.267261	3.74166	-0.267261	-0.267261	-0.267261	-0.267261
OG0020347	N	N	Y		0	0		NA	NA	NA	NA		NA	NA		0	0	0	0	0	0	0	0	0	1	0	0	0	0	0	0	1	0			-0.267261	-0.267261	-0.267261	-0.267261	-0.267261	-0.267261	-0.267261	-0.267261	-0.267261	3.74166	-0.267261	-0.267261	-0.267261	-0.267261
[truncated: 21,846 more rows]
[truncated: 1 more columns]
