# Supplementary material for: Chloroplast acquisition without the gene transfer in kleptoplastic sea slugs, Plakobranchus ocellatus
Source: eLife journal article supplement (doi:10.7554/elife.60176), 2021-04-26
Supplement: supp17 [file annotated_taxon_by_MEGAN.xlsx]

## Sheet: MEGAN results
Predicted gene orign for all PoB genes befor the contamination removal
-2, Not assigned; -1, No hits
gene ID	MEGAN annotation taxon (NCBI taxon)
p1025c65.64	1
p14648c72.5	1
p1494c60.2	1
p1494c60.3	1
p1517c61.20	1
p1595c62.3	1
p1662c68.167	1
p189c72.145	1
p2011c52.10	1
p2197c68.94	1
p237c67.39	1
p238c64.187	1
p2538c67.32	1
p25694c51.2	1
p275c64.39	1
p3008c49.17	1
p36440c35.1	1
p368c71.57	1
p368c71.53	1
p386c60.60	1
p397c66.15	1
p397c66.19	1
p397c66.16	1
p415c66.47	1
p515c60.340	1
p520c59.1	1
p5768c56.6	1
p606c64.121	1
p606c64.124	1
p6257c70.183	1
p11c67.18	1
p11c67.19	1
p6c66.52	1
p796c62.136	1
p84434c75.1	1
p948c62.80	1
p1259c74.93	131567
p126c77.98	131567
p126c77.105	131567
p126c77.89	131567
p126c77.96	131567
p1271c65.63	131567
p128092c30.1	131567
p1283c67.3	131567
p1283c67.1	131567
p1283c67.114	131567
p1283c67.7	131567
p1283c67.102	131567
p1018c66.37	131567
p1284c68.60	131567
p1284c68.56	131567
p1284c68.15	131567
p1018c66.38	131567
p1284c68.31	131567
p1018c66.33	131567
p1299c74.131	131567
p129c72.32	131567
p129c72.23	131567
p129c72.53	131567
p129c72.33	131567
p129c72.169	131567
p129c72.52	131567
p12c69.81	131567
p12c69.34	131567
p12c69.32	131567
p12c69.14	131567
p1305c61.33	131567
p1312c75.8	131567
p13163c43.2	131567
p1320c51.1	131567
p13214c75.1	131567
p1326c64.40	131567
p1326c64.68	131567
p132c71.23	131567
p1025c65.18	131567
p1343c63.3	131567
p1344c68.31	131567
p1344c68.41	131567
p134c65.34	131567
p134c65.6	131567
p1350c58.10	131567
p1350c58.22	131567
p1350c58.9	131567
p138c61.59	131567
p138c61.154	131567
p138c61.189	131567
p138c61.184	131567
p1039c62.14	131567
p1391c61.99	131567
p1391c61.21	131567
p1391c61.113	131567
p1391c61.8	131567
p1398c71.34	131567
p1401c64.37	131567
p1409c63.15	131567
p1409c63.17	131567
p1412c61.8	131567
p1413c65.30	131567
p1418c76.10	131567
p1425c64.153	131567
p1425c64.107	131567
p1425c64.150	131567
p1425c64.157	131567
p1425c64.57	131567
p1427c68.18	131567
p1039c62.13	131567
p1427c68.9	131567
p1427c68.55	131567
p143c69.36	131567
p1440c63.156	131567
p1440c63.123	131567
p1440c63.153	131567
p1043c67.98	131567
p1442c72.25	131567
p1454c61.26	131567
p1454c61.27	131567
p145c61.12	131567
p145c61.14	131567
p145c61.42	131567
p1464c63.82	131567
p1464c63.103	131567
p1464c63.3	131567
p1464c63.72	131567
p1464c63.66	131567
p1468c63.49	131567
p1470c61.14	131567
p1470c61.10	131567
p1470c61.9	131567
p1470c61.30	131567
p1481c68.29	131567
p1487c67.79	131567
p1494c60.45	131567
p1499c55.36	131567
p14c62.160	131567
p14c62.74	131567
p14c62.92	131567
p1511c63.18	131567
p15149c55.1	131567
p104658c47.1	131567
p15227c53.1	131567
p1531c64.47	131567
p1531c64.14	131567
p1531c64.49	131567
p1531c64.24	131567
p15321c66.8	131567
p15321c66.9	131567
p1548c63.26	131567
p1548c63.23	131567
p15549c52.12	131567
p1047c61.21	131567
p155c78.14	131567
p156c62.27	131567
p156c62.31	131567
p156c62.30	131567
p156c62.32	131567
p156c62.39	131567
p156c62.28	131567
p1573c63.4	131567
p1579c67.97	131567
p15839c82.4	131567
p1586c67.10	131567
p104c55.2	131567
p15c75.104	131567
p104c55.1	131567
p15c75.45	131567
p15c75.31	131567
p15c75.51	131567
p15c75.38	131567
p15c75.33	131567
p1639c70.109	131567
p1639c70.104	131567
p1639c70.23	131567
p1639c70.108	131567
p16594c41.1	131567
p1662c68.188	131567
p1662c68.190	131567
p1662c68.63	131567
p1662c68.189	131567
p1662c68.187	131567
p1662c68.185	131567
p1662c68.37	131567
p1662c68.18	131567
p166c70.11	131567
p16742c40.6	131567
p167c70.285	131567
p167c70.271	131567
p167c70.306	131567
p167c70.286	131567
p167c70.164	131567
p167c70.68	131567
p167c70.99	131567
p1686c67.57	131567
p1001c63.52	131567
p1001c63.51	131567
p1686c67.11	131567
p1686c67.71	131567
p1054c58.1	131567
p105773c61.1	131567
p10578c68.1	131567
p16c66.42	131567
p16c66.133	131567
p16c66.45	131567
p16c66.12	131567
p16c66.40	131567
p16c66.46	131567
p16c66.92	131567
p16c66.125	131567
p170c62.54	131567
p171c61.16	131567
p171c61.7	131567
p171c61.15	131567
p171c61.197	131567
p171c61.5	131567
p171c61.85	131567
p171c61.4	131567
p171c61.168	131567
p1726c61.3	131567
p1726c61.2	131567
p172c64.11	131567
p1739c63.2	131567
p1739c63.40	131567
p1739c63.44	131567
p1739c63.84	131567
p1739c63.73	131567
p1739c63.76	131567
p1740c61.12	131567
p1753c40.14	131567
p1753c40.15	131567
p1754c60.17	131567
p175c61.6	131567
p175c61.31	131567
p107090c34.1	131567
p177c64.121	131567
p178c62.99	131567
p1795c75.1	131567
p179c65.32	131567
p17c67.164	131567
p17c67.34	131567
p17c67.72	131567
p17c67.79	131567
p1802c67.27	131567
p1802c67.43	131567
p1074c60.100	131567
p180c68.14	131567
p180c68.94	131567
p180c68.15	131567
p180c68.114	131567
p180c68.181	131567
p180c68.1	131567
p180c68.93	131567
p181c56.69	131567
p18297c74.29	131567
p18329c37.2	131567
p1844c70.11	131567
p1074c60.101	131567
p1848c83.1	131567
p1851c72.41	131567
p1851c72.78	131567
p1857c64.22	131567
p1860c62.79	131567
p1860c62.11	131567
p1860c62.58	131567
p1860c62.71	131567
p1076c71.49	131567
p1866c63.49	131567
p1866c63.87	131567
p1876c72.48	131567
p1876c72.45	131567
p1881c63.53	131567
p1881c63.10	131567
p188c71.140	131567
p188c71.145	131567
p189c72.77	131567
p189c72.108	131567
p18c69.17	131567
p1907c60.8	131567
p190c77.90	131567
p190c77.62	131567
p190c77.18	131567
p190c77.28	131567
p190c77.59	131567
p190c77.82	131567
p190c77.85	131567
p190c77.55	131567
p190c77.20	131567
p190c77.33	131567
p190c77.86	131567
p190c77.60	131567
p1911c62.44	131567
p193c57.97	131567
p193c57.46	131567
p193c57.26	131567
p1076c71.56	131567
p1940c65.44	131567
p1941c66.2	131567
p1947c65.21	131567
p1947c65.56	131567
p1949c65.34	131567
p1949c65.51	131567
p194c60.2	131567
p1954c59.11	131567
p1954c59.5	131567
p19571c39.1	131567
p1959c71.16	131567
p1006c70.21	131567
p195c62.30	131567
p195c62.54	131567
p195c62.102	131567
p195c62.91	131567
p196c65.62	131567
p196c65.46	131567
p196c65.5	131567
p1979c62.68	131567
p1979c62.10	131567
p1987c67.6	131567
p1987c67.59	131567
p1987c67.61	131567
p1987c67.118	131567
p1c64.29	131567
p2021c67.42	131567
p20315c57.3	131567
p2036c63.31	131567
p2037c74.24	131567
p2037c74.5	131567
p2037c74.6	131567
p2039c73.12	131567
p2046c64.125	131567
p204c70.13	131567
p2051c59.33	131567
p2053c66.142	131567
p2053c66.50	131567
p2053c66.36	131567
p2053c66.153	131567
p2053c66.141	131567
p2053c66.48	131567
p2053c66.151	131567
p2057c61.47	131567
p20585c41.1	131567
p2068c76.13	131567
p2068c76.10	131567
p2070c65.62	131567
p1079c64.7	131567
p2092c44.38	131567
p2105c61.47	131567
p2105c61.48	131567
p2105c61.18	131567
p2105c61.10	131567
p2114c60.10	131567
p2120c64.18	131567
p2120c64.9	131567
p2150c71.39	131567
p2169c57.10	131567
p216c65.65	131567
p216c65.63	131567
p216c65.26	131567
p216c65.40	131567
p2170c72.36	131567
p2170c72.79	131567
p2170c72.3	131567
p2176c61.49	131567
p2178c77.47	131567
p2178c77.16	131567
p2178c77.15	131567
p2178c77.58	131567
p218c60.84	131567
p218c60.39	131567
p1085c60.34	131567
p218c60.76	131567
p2195c58.25	131567
p1085c60.11	131567
p2197c68.33	131567
p2197c68.66	131567
p2197c68.80	131567
p220c72.139	131567
p220c72.121	131567
p1006c70.22	131567
p221c62.181	131567
p221c62.42	131567
p2251c65.49	131567
p2264c70.54	131567
p226c65.74	131567
p226c65.100	131567
p227c62.16	131567
p22841c78.3	131567
p228c65.84	131567
p228c65.28	131567
p228c65.38	131567
p228c65.20	131567
p229c67.72	131567
p229c67.146	131567
p229c67.12	131567
p22c64.81	131567
p1086c67.33	131567
p1086c67.45	131567
p22c64.126	131567
p22c64.39	131567
p2308c46.1	131567
p231c63.14	131567
p232c69.16	131567
p233c60.15	131567
p233c60.102	131567
p233c60.53	131567
p23437c72.6	131567
p2347c71.2	131567
p234c64.89	131567
p234c64.132	131567
p234c64.6	131567
p234c64.88	131567
p2350c68.29	131567
p237c67.36	131567
p2383c61.21	131567
p238c64.117	131567
p238c64.27	131567
p238c64.186	131567
p238c64.65	131567
p238c64.152	131567
p23c62.36	131567
p240c62.121	131567
p240c62.11	131567
p240c62.308	131567
p1090c58.91	131567
p240c62.13	131567
p240c62.140	131567
p240c62.210	131567
p2413c58.61	131567
p2413c58.67	131567
p244c63.89	131567
p1098c66.2	131567
p245c58.75	131567
p245c58.79	131567
p245c58.78	131567
p247c57.37	131567
p247c57.24	131567
p24840c37.1	131567
p24840c37.2	131567
p2492c65.97	131567
p1104c64.15	131567
p2492c65.78	131567
p2498c77.77	131567
p2498c77.20	131567
p2498c77.26	131567
p2498c77.75	131567
p2498c77.14	131567
p2498c77.13	131567
p2498c77.21	131567
p2498c77.52	131567
p2498c77.81	131567
p24c58.1	131567
p24c58.6	131567
p250c68.30	131567
p250c68.32	131567
p250c68.22	131567
p2530c72.27	131567
p2530c72.38	131567
p2532c67.34	131567
p2532c67.31	131567
p2538c67.1	131567
p254539c54.1	131567
p254c66.99	131567
p254c66.94	131567
p254c66.101	131567
p2550c65.70	131567
p255144c47.1	131567
p2565c63.49	131567
p256c68.47	131567
p256c68.29	131567
p2572c63.9	131567
p2572c63.7	131567
p2576c64.36	131567
p2578c46.1	131567
p257c63.164	131567
p257c63.144	131567
p257c63.153	131567
p257c63.223	131567
p257c63.127	131567
p257c63.131	131567
p258530c73.46	131567
p258530c73.13	131567
p258530c73.30	131567
p258530c73.61	131567
p258587c46.1	131567
p258604c69.55	131567
p258608c51.1	131567
p258633c66.59	131567
p258665c71.68	131567
p258668c60.3	131567
p258670c68.5	131567
p258706c51.4	131567
p258731c69.239	131567
p258731c69.41	131567
p258731c69.47	131567
p258734c62.166	131567
p258734c62.39	131567
p258734c62.124	131567
p1113c64.1	131567
p258736c67.36	131567
p258738c65.1	131567
p258740c66.53	131567
p258740c66.44	131567
p258742c70.14	131567
p1114c62.4	131567
p258742c70.29	131567
p258742c70.26	131567
p258745c64.51	131567
p258745c64.109	131567
p258745c64.7	131567
p258746c66.212	131567
p258746c66.204	131567
p258746c66.111	131567
p258746c66.39	131567
p258746c66.209	131567
p258746c66.263	131567
p258746c66.158	131567
p258746c66.154	131567
p258746c66.23	131567
p258746c66.242	131567
p258746c66.206	131567
p258747c66.33	131567
p258747c66.9	131567
p258748c66.82	131567
p258748c66.11	131567
p258748c66.14	131567
p258748c66.97	131567
p258748c66.92	131567
p258748c66.89	131567
p258752c70.61	131567
p258752c70.69	131567
p258753c65.140	131567
p258753c65.133	131567
p258753c65.75	131567
p258753c65.85	131567
p258753c65.12	131567
p258753c65.145	131567
p258754c68.80	131567
p1120c60.30	131567
p258755c69.20	131567
p258755c69.153	131567
p258755c69.126	131567
p258755c69.141	131567
p258755c69.114	131567
p258755c69.46	131567
p258756c65.33	131567
p258757c71.37	131567
p258759c63.41	131567
p258759c63.8	131567
p258759c63.14	131567
p258760c66.6	131567
p258764c69.24	131567
p258766c60.3	131567
p258767c72.4	131567
p258769c66.3	131567
p258769c66.4	131567
p258770c67.25	131567
p1120c60.54	131567
p258773c67.13	131567
p258777c63.6	131567
p258779c67.112	131567
p258781c59.13	131567
p258784c52.3	131567
p258785c70.21	131567
p258790c64.39	131567
p1121c63.26	131567
p258793c65.1	131567
p258835c69.8	131567
p258836c59.5	131567
p1121c63.114	131567
p258836c59.26	131567
p258836c59.17	131567
p258838c66.14	131567
p258840c67.11	131567
p258840c67.24	131567
p258843c55.2	131567
p258843c55.1	131567
p100c71.75	131567
p2590c71.21	131567
p2590c71.68	131567
p259c66.139	131567
p1121c63.92	131567
p259c66.160	131567
p259c66.143	131567
p2606c55.2	131567
p112681c63.1	131567
p263c67.102	131567
p264c61.44	131567
p2659c71.13	131567
p266c63.206	131567
p266c63.71	131567
p266c63.348	131567
p266c63.7	131567
p266c63.345	131567
p266c63.299	131567
p266c63.300	131567
p2687c64.70	131567
p2687c64.2	131567
p2701c65.42	131567
p2701c65.14	131567
p2701c65.13	131567
p2701c65.5	131567
p270c65.64	131567
p270c65.36	131567
p2724c54.14	131567
p2724c54.5	131567
p2724c54.3	131567
p2724c54.8	131567
p2724c54.7	131567
p2724c54.22	131567
p2725c55.4	131567
p2728c59.5	131567
p2751c67.3	131567
p2780c61.14	131567
p2786c58.9	131567
p27890c70.1	131567
p27965c39.1	131567
p27965c39.2	131567
p2796c65.30	131567
p2796c65.31	131567
p2799c62.20	131567
p2806c65.4	131567
p2806c65.11	131567
p1128c67.114	131567
p280c67.28	131567
p280c67.12	131567
p1128c67.7	131567
p1129c66.53	131567
p2827c71.28	131567
p2828c54.2	131567
p282c66.96	131567
p282c66.45	131567
p282c66.153	131567
p1129c66.33	131567
p1129c66.62	131567
p284c66.12	131567
p286c65.93	131567
p1129c66.31	131567
p286c65.43	131567
p286c65.52	131567
p28861c38.2	131567
p1129c66.52	131567
p1129c66.41	131567
p288c60.200	131567
p288c60.96	131567
p2892c56.107	131567
p290c68.6	131567
p112c67.48	131567
p293c61.61	131567
p2951c38.3	131567
p2951c38.1	131567
p2972c65.9	131567
p2972c65.5	131567
p2998c67.18	131567
p2998c67.24	131567
p112c67.52	131567
p29c70.3	131567
p2c67.79	131567
p2c67.3	131567
p2c67.89	131567
p303c59.18	131567
p303c59.5	131567
p303c59.4	131567
p304c69.65	131567
p304c69.148	131567
p3054c66.133	131567
p3078c65.9	131567
p3078c65.52	131567
p30842c40.1	131567
p30874c43.2	131567
p309c64.39	131567
p310c70.53	131567
p310c70.15	131567
p310c70.131	131567
p310c70.89	131567
p311c62.61	131567
p311c62.62	131567
p311c62.60	131567
p31281c40.1	131567
p3159c54.25	131567
p315c41.2	131567
p317c64.193	131567
p317c64.54	131567
p317c64.205	131567
p317c64.219	131567
p317c64.215	131567
p317c64.58	131567
p317c64.222	131567
p317c64.207	131567
p317c64.189	131567
p317c64.247	131567
p113c60.28	131567
p3183c70.77	131567
p3183c70.25	131567
p113c60.50	131567
p319c70.191	131567
p113c60.54	131567
p319c70.25	131567
p319c70.26	131567
p319c70.183	131567
p3205c77.61	131567
p3205c77.31	131567
p3205c77.36	131567
p3205c77.66	131567
p3205c77.12	131567
p3205c77.11	131567
p3205c77.80	131567
p3205c77.41	131567
p3212c61.14	131567
p1140c70.54	131567
p3219c67.39	131567
p3230c72.151	131567
p3230c72.47	131567
p3230c72.80	131567
p3230c72.86	131567
p323c62.43	131567
p323c62.10	131567
p327c72.68	131567
p327c72.86	131567
p3286c65.49	131567
p3286c65.47	131567
p3295c71.12	131567
p3295c71.5	131567
p329c71.73	131567
p329c71.75	131567
p329c71.14	131567
p329c71.301	131567
p329c71.331	131567
p329c71.50	131567
p329c71.332	131567
p1013c63.13	131567
p1142c63.8	131567
p330c75.116	131567
p330c75.137	131567
p330c75.41	131567
p330c75.113	131567
p330c75.44	131567
p330c75.109	131567
p330c75.132	131567
p330c75.28	131567
p330c75.103	131567
p330c75.138	131567
p330c75.120	131567
p330c75.43	131567
p330c75.131	131567
p330c75.21	131567
p332c71.14	131567
p332c71.102	131567
p3334c67.25	131567
p3334c67.156	131567
p3334c67.50	131567
p333c67.91	131567
p333c67.152	131567
p333c67.266	131567
p333c67.211	131567
p33432c34.4	131567
p3343c36.3	131567
p335c60.36	131567
p1147c61.74	131567
p1147c61.22	131567
p3360c67.31	131567
p3374c59.31	131567
p3384c60.59	131567
p3384c60.121	131567
p3388c67.65	131567
p3391c70.15	131567
p3391c70.13	131567
p339c68.59	131567
p339c68.93	131567
p339c68.58	131567
p339c68.43	131567
p339c68.11	131567
p3417c38.8	131567
p3419c53.6	131567
p3419c53.12	131567
p3419c53.11	131567
p34475c47.2	131567
p344c62.347	131567
p344c62.360	131567
p344c62.65	131567
p344c62.286	131567
p344c62.159	131567
p344c62.359	131567
p344c62.354	131567
p344c62.168	131567
p34c66.31	131567
p114c62.70	131567
p353c75.7	131567
p353c75.11	131567
p354c65.41	131567
p354c65.14	131567
p355c76.17	131567
p359c67.33	131567
p359c67.30	131567
p359c67.32	131567
p3602c37.4	131567
p3621c73.6	131567
p3621c73.3	131567
p3633c66.32	131567
p3633c66.7	131567
p3633c66.8	131567
p3635c68.23	131567
p3664c62.65	131567
p3664c62.2	131567
p36793c49.2	131567
p11504c40.2	131567
p367c62.45	131567
p367c62.127	131567
p36c66.99	131567
p36c66.152	131567
p36c66.174	131567
p371c66.46	131567
p3721c61.1	131567
p37404c69.214	131567
p37404c69.107	131567
p37404c69.23	131567
p37404c69.53	131567
p3790c62.31	131567
p3790c62.26	131567
p379c75.257	131567
p379c75.336	131567
p379c75.301	131567
p1153c68.8	131567
p379c75.166	131567
p379c75.163	131567
p379c75.94	131567
p379c75.27	131567
p379c75.281	131567
p379c75.111	131567
p379c75.110	131567
p379c75.196	131567
p379c75.113	131567
p379c75.228	131567
p381c54.54	131567
p381c54.50	131567
p38352c52.1	131567
p3836c74.2	131567
p385c65.70	131567
p385c65.78	131567
p386c60.131	131567
p386c60.129	131567
p386c60.84	131567
p38c58.32	131567
p38c58.35	131567
p38c58.184	131567
p39199c39.1	131567
p3924c64.3	131567
p3924c64.70	131567
p393c65.107	131567
p393c65.89	131567
p393c65.110	131567
p3952c56.15	131567
p3993c53.4	131567
p39c63.239	131567
p39c63.168	131567
p39c63.8	131567
p39c63.75	131567
p39c63.36	131567
p39c63.248	131567
p39c63.98	131567
p39c63.74	131567
p39c63.260	131567
p39c63.16	131567
p4000c64.25	131567
p400c61.20	131567
p4016c57.12	131567
p4016c57.28	131567
p4016c57.21	131567
p4016c57.20	131567
p4034c53.3	131567
p4035c66.20	131567
p4035c66.84	131567
p4040c55.1	131567
p406c65.152	131567
p406c65.151	131567
p406c65.124	131567
p409c65.48	131567
p409c65.12	131567
p409c65.1	131567
p409c65.28	131567
p4154c75.1	131567
p4154c75.28	131567
p41554c63.1	131567
p415c66.13	131567
p415c66.4	131567
p41c62.19	131567
p4224c62.18	131567
p422c65.7	131567
p422c65.125	131567
p427c62.10	131567
p427c62.1	131567
p4288c63.68	131567
p4288c63.17	131567
p4288c63.10	131567
p428c65.27	131567
p428c65.139	131567
p429c63.394	131567
p429c63.248	131567
p429c63.364	131567
p429c63.402	131567
p429c63.401	131567
p429c63.43	131567
p117c71.305	131567
p429c63.124	131567
p429c63.178	131567
p4334c64.24	131567
p4369c57.13	131567
p43705c71.1	131567
p437c61.16	131567
p43870c55.1	131567
p438c70.106	131567
p438c70.120	131567
p438c70.93	131567
p438c70.37	131567
p4400c68.2	131567
p4407c64.26	131567
p4407c64.25	131567
p4407c64.12	131567
p4407c64.35	131567
p440c72.100	131567
p440c72.333	131567
p440c72.56	131567
p440c72.127	131567
p440c72.23	131567
p440c72.55	131567
p441c78.22	131567
p441c78.2	131567
p448c68.102	131567
p448c68.94	131567
p448c68.99	131567
p45387c41.1	131567
p4547c74.23	131567
p4547c74.24	131567
p4547c74.36	131567
p455c66.155	131567
p455c66.131	131567
p455c66.14	131567
p455c66.3	131567
p455c66.81	131567
p457c71.92	131567
p457c71.134	131567
p45802c62.32	131567
p45802c62.33	131567
p45802c62.31	131567
p458c69.60	131567
p459c71.85	131567
p459c71.144	131567
p459c71.21	131567
p1015c69.270	131567
p45c69.18	131567
p45c69.16	131567
p45c69.17	131567
p45c69.91	131567
p45c69.113	131567
p45c69.89	131567
p45c69.58	131567
p461c66.88	131567
p461c66.34	131567
p46283c77.5	131567
p46283c77.6	131567
p46283c77.7	131567
p4653c65.34	131567
p466c59.83	131567
p117c71.229	131567
p469c60.13	131567
p11805c41.22	131567
p471c64.2	131567
p471c64.82	131567
p471c64.52	131567
p471c64.83	131567
p11805c41.1	131567
p11805c41.23	131567
p473c72.5	131567
p473c72.167	131567
p1180c74.97	131567
p473c72.189	131567
p473c72.118	131567
p473c72.9	131567
p473c72.140	131567
p1180c74.27	131567
p4770c39.1	131567
p47855c41.1	131567
p4787c74.2	131567
p4787c74.1	131567
p47c72.56	131567
p47c72.83	131567
p47c72.103	131567
p47c72.15	131567
p47c72.20	131567
p47c72.55	131567
p47c72.132	131567
p481c73.80	131567
p481c73.90	131567
p481c73.91	131567
p4865c77.11	131567
p4865c77.2	131567
p4865c77.10	131567
p4867c67.42	131567
p4874c63.65	131567
p4874c63.16	131567
p4874c63.35	131567
p48c60.114	131567
p48c60.113	131567
p48c60.94	131567
p4907c66.67	131567
p4907c66.66	131567
p494c61.143	131567
p494c61.121	131567
p4984c68.15	131567
p4984c68.10	131567
p498c50.10	131567
p498c50.3	131567
p499c60.135	131567
p499c60.83	131567
p499c60.90	131567
p4c69.49	131567
p501c63.85	131567
p1182c65.4	131567
p506c64.40	131567
p509c73.97	131567
p509c73.30	131567
p509c73.136	131567
p510c68.8	131567
p510c68.1	131567
p510c68.40	131567
p5127c49.9	131567
p512c64.65	131567
p512c64.67	131567
p512c64.4	131567
p512c64.68	131567
p51547c56.1	131567
p515c60.148	131567
p515c60.175	131567
p515c60.302	131567
p519c69.78	131567
p519c69.93	131567
p520c59.57	131567
p520c59.3	131567
p520c59.2	131567
p520c59.85	131567
p520c59.43	131567
p52230c36.1	131567
p118c63.40	131567
p525c63.60	131567
p525c63.61	131567
p118c63.43	131567
p5324c63.14	131567
p5366c33.5	131567
p118c63.66	131567
p5429c58.6	131567
p543c70.197	131567
p543c70.192	131567
p543c70.160	131567
p543c70.149	131567
p543c70.196	131567
p5467c66.2	131567
p5469c65.108	131567
p5469c65.110	131567
p5474c57.10	131567
p5474c57.8	131567
p549c45.20	131567
p549c45.21	131567
p5521c66.10	131567
p559c63.26	131567
p561c61.3	131567
p561c61.16	131567
p5646c45.6	131567
p5677c44.1	131567
p1015c69.139	131567
p5704c68.11	131567
p571c66.15	131567
p571c66.16	131567
p57501c58.1	131567
p5768c56.5	131567
p57c61.168	131567
p57c61.90	131567
p57c61.197	131567
p57c61.196	131567
p57c61.111	131567
p1194c63.137	131567
p586c60.69	131567
p586c60.73	131567
p586c60.90	131567
p586c60.27	131567
p586c60.91	131567
p589c77.10	131567
p1194c63.74	131567
p5928c47.2	131567
p5939c69.3	131567
p59c63.1	131567
p59c63.83	131567
p601c72.41	131567
p606c64.119	131567
p606c64.31	131567
p60782c49.1	131567
p6081c44.2	131567
p608c59.7	131567
p6090c59.1	131567
p60c59.55	131567
p60c59.83	131567
p60c59.49	131567
p60c59.48	131567
p616c67.11	131567
p617c71.133	131567
p621c60.65	131567
p621c60.61	131567
p1197c63.4	131567
p626c58.16	131567
p628c67.22	131567
p628c67.20	131567
p6313c71.81	131567
p6313c71.85	131567
p6313c71.82	131567
p633c62.13	131567
p633c62.26	131567
p638c73.9	131567
p638c73.371	131567
p638c73.246	131567
p638c73.263	131567
p638c73.337	131567
p638c73.199	131567
p638c73.245	131567
p638c73.304	131567
p638c73.360	131567
p638c73.300	131567
p638c73.44	131567
p638c73.213	131567
p638c73.28	131567
p639c70.98	131567
p639c70.94	131567
p63c64.6	131567
p11c67.145	131567
p644c67.68	131567
p644c67.93	131567
p1015c69.83	131567
p64549c46.1	131567
p645c67.86	131567
p645c67.85	131567
p645c67.76	131567
p645c67.220	131567
p645c67.90	131567
p645c67.198	131567
p645c67.80	131567
p645c67.44	131567
p645c67.148	131567
p6495c47.3	131567
p650c70.15	131567
p6592c35.1	131567
p65c70.3	131567
p11c67.60	131567
p11c67.125	131567
p66c69.106	131567
p1015c69.303	131567
p1015c69.137	131567
p66c69.19	131567
p66c69.15	131567
p66c69.89	131567
p674c69.26	131567
p674c69.101	131567
p675c59.72	131567
p675c59.22	131567
p675c59.46	131567
p675c59.29	131567
p67663c42.1	131567
p6831c59.3	131567
p685c68.95	131567
p6881c51.4	131567
p695c59.46	131567
p698c62.94	131567
p698c62.98	131567
p69c69.73	131567
p69c69.20	131567
p69c69.136	131567
p1215c59.87	131567
p6c66.224	131567
p6c66.53	131567
p6c66.187	131567
p6c66.56	131567
p703c61.68	131567
p703c61.10	131567
p704c61.48	131567
p706c62.6	131567
p70c62.188	131567
p70c62.109	131567
p70c62.129	131567
p7107c59.7	131567
p710c65.38	131567
p71c65.2	131567
p121c49.12	131567
p72246c48.2	131567
p7351c70.26	131567
p7351c70.53	131567
p7351c70.32	131567
p735c63.69	131567
p736c58.82	131567
p736c58.48	131567
p741c64.66	131567
p746c69.34	131567
p1220c62.39	131567
p74c63.3	131567
p752c61.26	131567
p754c67.104	131567
p754c67.83	131567
p754c67.17	131567
p754c67.81	131567
p754c67.100	131567
p758c62.71	131567
p758c62.55	131567
p759c76.71	131567
p75c56.60	131567
p760c70.1	131567
p7613c68.11	131567
p761c66.69	131567
p7626c39.1	131567
p763c69.60	131567
p763c69.154	131567
p763c69.44	131567
p763c69.11	131567
p7673c49.1	131567
p768c75.38	131567
p768c75.107	131567
p768c75.34	131567
p768c75.98	131567
p768c75.22	131567
p770c72.57	131567
p772c66.26	131567
p1228c44.10	131567
p775c64.24	131567
p77c68.17	131567
p77c68.101	131567
p1230c76.36	131567
p78254c42.1	131567
p786c63.15	131567
p786c63.4	131567
p788c60.30	131567
p1015c69.140	131567
p12370c28.7	131567
p12370c28.3	131567
p12370c28.19	131567
p12370c28.4	131567
p12370c28.6	131567
p12370c28.17	131567
p7915c66.20	131567
p796c62.80	131567
p12370c28.1	131567
p796c62.76	131567
p796c62.144	131567
p796c62.77	131567
p796c62.254	131567
p796c62.171	131567
p800c68.58	131567
p800c68.130	131567
p800c68.11	131567
p80127c34.1	131567
p804c64.12	131567
p806c65.3	131567
p1015c69.275	131567
p806c65.17	131567
p123c64.14	131567
p8102c64.17	131567
p812c68.195	131567
p812c68.81	131567
p812c68.155	131567
p8162c67.102	131567
p8162c67.101	131567
p819c55.10	131567
p826c64.312	131567
p826c64.227	131567
p826c64.136	131567
p1242c67.35	131567
p826c64.14	131567
p1242c67.60	131567
p8290c76.12	131567
p830c56.2	131567
p8329c60.37	131567
p8329c60.98	131567
p833c63.45	131567
p833c63.172	131567
p833c63.40	131567
p8343c70.1	131567
p83468c38.1	131567
p838c70.214	131567
p838c70.39	131567
p838c70.259	131567
p838c70.57	131567
p838c70.135	131567
p838c70.31	131567
p838c70.201	131567
p838c70.271	131567
p840c69.118	131567
p840c69.70	131567
p8438c47.4	131567
p8454c71.6	131567
p845c60.30	131567
p847c78.25	131567
p854c69.1	131567
p8558c44.6	131567
p855c67.43	131567
p8566c42.1	131567
p8610c43.21	131567
p862c58.76	131567
p8635c38.3	131567
p124c71.168	131567
p87c52.34	131567
p124c71.296	131567
p881c59.14	131567
p883c68.157	131567
p883c68.42	131567
p884c71.79	131567
p884c71.78	131567
p884c71.91	131567
p884c71.89	131567
p884c71.48	131567
p885c70.31	131567
p887c55.8	131567
p890c63.86	131567
p8922c70.7	131567
p8945c77.4	131567
p1015c69.319	131567
p8945c77.33	131567
p8945c77.2	131567
p8945c77.14	131567
p894c57.7	131567
p894c57.11	131567
p89c59.94	131567
p8c71.56	131567
p90166c34.2	131567
p906c62.43	131567
p906c62.82	131567
p906c62.89	131567
p907c69.20	131567
p910c76.17	131567
p912c82.4	131567
p918c66.69	131567
p918c66.45	131567
p918c66.181	131567
p918c66.14	131567
p919c66.1	131567
p922c67.27	131567
p922c67.65	131567
p925c66.2	131567
p925c66.54	131567
p929c55.54	131567
p1015c69.321	131567
p94040c74.24	131567
p942c65.26	131567
p12534c37.1	131567
p943c68.43	131567
p943c68.62	131567
p943c68.44	131567
p947c59.172	131567
p947c59.168	131567
p947c59.12	131567
p947c59.222	131567
p947c59.209	131567
p947c59.74	131567
p947c59.26	131567
p948c62.21	131567
p949c67.3	131567
p949c67.8	131567
p949c67.7	131567
p949c67.131	131567
p949c67.63	131567
p952c69.6	131567
p952c69.36	131567
p952c69.34	131567
p9535c61.12	131567
p957c71.95	131567
p957c71.24	131567
p957c71.72	131567
p957c71.63	131567
p957c71.75	131567
p957c71.69	131567
p958c60.137	131567
p958c60.131	131567
p959c67.146	131567
p959c67.136	131567
p959c67.148	131567
p959c67.147	131567
p959c67.144	131567
p959c67.149	131567
p959c67.80	131567
p959c67.69	131567
p9643c65.14	131567
p972c65.10	131567
p97380c81.53	131567
p97380c81.45	131567
p1259c74.6	131567
p977c61.18	131567
p977c61.5	131567
p977c61.4	131567
p978c41.2	131567
p97c59.70	131567
p987c70.13	131567
p988c67.45	131567
p988c67.7	131567
p98c60.56	131567
p1259c74.23	131567
p98c60.4	131567
p98c60.101	131567
p98c60.26	131567
p98c60.3	131567
p98c60.1	131567
p98c60.85	131567
p98c60.22	131567
p98c60.60	131567
p98c60.2	131567
p98c60.18	131567
p98c60.37	131567
p99932c41.1	2
p126c77.52	2
p128c64.11	2
p132424c40.1	2
p138c61.104	2
p1438c46.9	2
p1448c62.36	2
p146274c45.2	2
p1464c63.41	2
p1488c54.5	2
p1511c63.48	2
p1549c61.8	2
p167c70.127	2
p16c66.43	2
p171c61.68	2
p171c61.148	2
p1740c61.128	2
p1740c61.48	2
p174c61.109	2
p1827c56.13	2
p193c57.31	2
p1079c64.101	2
p20045c50.1	2
p20512c41.6	2
p20512c41.4	2
p20512c41.2	2
p20512c41.3	2
p2054c67.17	2
p2251c65.35	2
p226c65.56	2
p240c62.61	2
p2416c63.17	2
p255984c65.32	2
p2565c63.20	2
p258565c65.1	2
p111238c22.1	2
p258734c62.175	2
p258756c65.32	2
p258824c43.1	2
p2633c66.14	2
p264c61.101	2
p2701c65.40	2
p2796c65.49	2
p112c67.94	2
p30253c19.1	2
p304c69.135	2
p30521c20.1	2
p3078c65.34	2
p31155c38.1	2
p317c64.73	2
p3225c66.36	2
p333c67.46	2
p3384c60.15	2
p343c61.3	2
p3664c62.27	2
p115647c39.1	2
p393c65.144	2
p39508c16.1	2
p4197c61.10	2
p43191c22.1	2
p441c78.19	2
p45170c41.6	2
p455c66.195	2
p45802c62.24	2
p469c60.50	2
p473c72.95	2
p494c61.130	2
p515c60.110	2
p515c60.108	2
p518c64.3	2
p1188c61.38	2
p1188c61.37	2
p52641c17.1	2
p5469c65.39	2
p54781c21.1	2
p57c61.156	2
p57c61.150	2
p59c63.10	2
p5c67.43	2
p616c67.10	2
p1199c59.1	2
p672c58.32	2
p69110c19.1	2
p706c62.79	2
p70c62.43	2
p7234c37.1	2
p735c63.38	2
p122629c18.1	2
p796c62.52	2
p804c64.11	2
p8162c67.113	2
p8396c21.1	2
p8438c47.13	2
p8438c47.6	2
p845c60.2	2
p862c58.36	2
p880c67.92	2
p9385c20.1	2
p958c60.57	2
p9643c65.19	2
p1271c65.12	1239
p14648c72.3	1239
p177c64.48	1239
p197c68.82	1239
p2196c74.6	1239
p221c62.15	1239
p3790c62.29	1239
p38c58.91	1239
p57c61.186	1239
p606c64.132	1239
p6313c71.52	1239
p650c70.8	1239
p735c63.70	1239
p7492c20.1	1239
p1357c43.4	91061
p14035c40.4	91061
p14648c72.6	91061
p1866c63.130	91061
p1949c65.2	91061
p1079c64.99	91061
p1079c64.113	91061
p1090c58.95	91061
p240c62.344	91061
p10119c43.1	91061
p2998c67.20	91061
p2998c67.28	91061
p3790c62.39	91061
p38c58.221	91061
p440c72.187	91061
p45c69.2	91061
p45c69.3	91061
p477c68.38	91061
p47c72.161	91061
p5961c46.1	91061
p59c63.136	91061
p7079c69.23	91061
p7079c69.24	91061
p736c58.43	91061
p736c58.44	91061
p736c58.45	91061
p77c68.21	91061
p77c68.18	91061
p833c63.170	91061
p1244c55.68	91061
p838c70.272	91061
p845c60.14	91061
p851c48.2	91061
p87c52.41	91061
p87c52.37	91061
p87c52.33	91061
p918c66.6	91061
p918c66.1	91061
p1357c43.5	1385
p14648c72.4	1385
p14648c72.8	1385
p14648c72.1	1385
p14648c72.9	1385
p17c67.85	1385
p1999c54.11	1385
p2102c68.10	1385
p227c62.9	1385
p227c62.205	1385
p237c67.35	1385
p237c67.32	1385
p258703c58.2	1385
p264c61.10	1385
p1128c67.53	1385
p3078c65.55	1385
p1013c63.46	1385
p339c68.139	1385
p34171c45.2	1385
p1153c68.2	1385
p1153c68.4	1385
p386c60.23	1385
p1153c68.6	1385
p4000c64.8	1385
p40474c56.7	1385
p40474c56.1	1385
p470c60.45	1385
p473c72.220	1385
p5366c33.6	1385
p5701c59.3	1385
p571c66.80	1385
p59c63.49	1385
p606c64.130	1385
p606c64.123	1385
p6257c70.11	1385
p645c67.74	1385
p6c66.367	1385
p826c64.117	1385
p826c64.174	1385
p838c70.270	1385
p838c70.273	1385
p840c69.23	1385
p880c67.94	1385
p918c66.8	1385
p928c68.1	1385
p948c62.76	1385
p12887c57.1	1224
p1487c67.24	1224
p1498c62.3	1224
p1662c68.166	1224
p171c61.6	1224
p189c72.125	1224
p190c77.61	1224
p2175c65.19	1224
p2195c58.27	1224
p22c64.37	1224
p258670c68.12	1224
p258746c66.208	1224
p258746c66.153	1224
p258748c66.84	1224
p258763c67.14	1224
p2623c58.24	1224
p26594c19.1	1224
p2679c79.13	1224
p2827c71.32	1224
p2c67.62	1224
p2c67.5	1224
p3146c75.29	1224
p3334c67.110	1224
p34c66.72	1224
p379c75.158	1224
p39397c57.2	1224
p457c71.4	1224
p46418c19.1	1224
p47c72.45	1224
p543c70.59	1224
p586c60.89	1224
p606c64.97	1224
p62098c74.2	1224
p1220c62.4	1224
p73109c18.1	1224
p735c63.97	1224
p768c75.113	1224
p12294c64.8	1224
p781c74.10	1224
p884c71.99	1224
p94040c74.12	1224
p957c71.96	1224
p13029c16.1	1236
p13371c15.1	1236
p135480c18.1	1236
p1415c66.31	1236
p16891c20.2	1236
p16891c20.1	1236
p180c68.97	1236
p107519c17.1	1236
p1881c63.32	1236
p190c77.17	1236
p20045c50.2	1236
p23953c15.1	1236
p2492c65.113	1236
p254462c73.1	1236
p1113c64.4	1236
p258746c66.114	1236
p2687c64.71	1236
p2796c65.46	1236
p281c61.2	1236
p29792c41.1	1236
p3092c15.1	1236
p31690c17.1	1236
p330c75.93	1236
p33555c16.1	1236
p11492c16.1	1236
p3419c53.13	1236
p36c66.58	1236
p379c75.248	1236
p38769c17.1	1236
p39c63.112	1236
p4191c20.1	1236
p46682c16.1	1236
p1015c69.25	1236
p52210c17.1	1236
p5429c58.17	1236
p60641c17.1	1236
p616c67.2	1236
p64619c14.1	1236
p67957c16.1	1236
p70918c18.1	1236
p12294c64.3	1236
p122959c16.1	1236
p87972c16.1	1236
p880c67.40	1236
p1299c74.27	32036
p129c72.21	32036
p129c72.34	32036
p1344c68.42	32036
p1425c64.104	32036
p1425c64.108	32036
p1427c68.141	32036
p1427c68.146	32036
p1599c56.53	32036
p15c75.37	32036
p15c75.36	32036
p17c67.76	32036
p18297c74.19	32036
p1851c72.79	32036
p18c69.18	32036
p190c77.52	32036
p190c77.67	32036
p1c64.5	32036
p1079c64.100	32036
p2053c66.321	32036
p2068c76.35	32036
p2070c65.63	32036
p21474c80.1	32036
p2178c77.17	32036
p2195c58.39	32036
p220c72.140	32036
p231c63.18	32036
p2383c61.84	32036
p2498c77.15	32036
p257c63.117	32036
p258530c73.14	32036
p258746c66.202	32036
p258746c66.134	32036
p258767c72.5	32036
p258773c67.12	32036
p258785c70.36	32036
p258842c83.5	32036
p2590c71.67	32036
p263c67.79	32036
p2754c76.5	32036
p2954c60.2	32036
p3146c75.35	32036
p3161c70.14	32036
p3205c77.16	32036
p3205c77.44	32036
p3230c72.6	32036
p329c71.346	32036
p329c71.355	32036
p330c75.51	32036
p3385c70.77	32036
p344c62.323	32036
p355c76.22	32036
p3664c62.1	32036
p367c62.114	32036
p37890c65.1	32036
p379c75.8	32036
p379c75.164	32036
p3807c69.10	32036
p3997c46.1	32036
p4012c71.1	32036
p4035c66.117	32036
p41c62.4	32036
p4305c48.1	32036
p438c70.169	32036
p43907c52.2	32036
p440c72.54	32036
p4489c77.19	32036
p4547c74.25	32036
p4547c74.16	32036
p4547c74.32	32036
p458c69.32	32036
p466c59.54	32036
p469c60.40	32036
p471c64.41	32036
p473c72.20	32036
p477c68.62	32036
p47c72.48	32036
p4865c77.6	32036
p48c60.43	32036
p509c73.4	32036
p543c70.40	32036
p5859c62.3	32036
p586c60.88	32036
p616c67.30	32036
p616c67.50	32036
p638c73.330	32036
p644c67.67	32036
p6939c78.27	32036
p735c63.62	32036
p75c56.46	32036
p761c66.46	32036
p762c66.1	32036
p763c69.61	32036
p763c69.9	32036
p8078c63.1	32036
p8245c45.1	32036
p826c64.188	32036
p826c64.130	32036
p838c70.26	32036
p838c70.25	32036
p853c70.7	32036
p854c69.65	32036
p8922c70.5	32036
p8945c77.8	32036
p89c59.18	32036
p910c76.56	32036
p92c69.32	32036
p93650c78.1	32036
p1259c74.32	32036
p97380c81.47	32036
p987c70.99	32036
p126c77.132	2340
p126c77.104	2340
p1271c65.60	2340
p1283c67.122	2340
p1283c67.99	2340
p128c64.38	2340
p1299c74.150	2340
p129c72.22	2340
p12c69.104	2340
p138c61.17	2340
p1464c63.42	2340
p14c62.150	2340
p15549c52.11	2340
p155c78.17	2340
p1573c63.5	2340
p15c75.69	2340
p15c75.32	2340
p15c75.42	2340
p15c75.112	2340
p16242c46.1	2340
p1624c59.2	2340
p167c70.296	2340
p17c67.80	2340
p180c68.133	2340
p18297c74.33	2340
p18329c37.1	2340
p18c69.19	2340
p190c77.54	2340
p190c77.66	2340
p1940c65.85	2340
p1987c67.159	2340
p1987c67.62	2340
p1987c67.7	2340
p2039c73.13	2340
p2070c65.61	2340
p2178c77.11	2340
p2197c68.73	2340
p2197c68.67	2340
p227c62.102	2340
p228c65.57	2340
p234c64.92	2340
p2383c61.20	2340
p238c64.136	2340
p244c63.85	2340
p2498c77.87	2340
p2498c77.76	2340
p258530c73.15	2340
p258731c69.238	2340
p258731c69.141	2340
p258734c62.82	2340
p258734c62.83	2340
p258734c62.81	2340
p258736c67.18	2340
p258743c69.12	2340
p258746c66.143	2340
p258746c66.159	2340
p258746c66.205	2340
p258753c65.144	2340
p258753c65.139	2340
p258755c69.113	2340
p258761c66.23	2340
p258781c59.23	2340
p258781c59.22	2340
p258835c69.9	2340
p258840c67.23	2340
p258840c67.12	2340
p259c66.103	2340
p2869c63.15	2340
p303c59.3	2340
p310c70.110	2340
p310c70.111	2340
p3183c70.3	2340
p3183c70.90	2340
p319c70.190	2340
p3205c77.20	2340
p3205c77.45	2340
p3230c72.54	2340
p3295c71.4	2340
p329c71.302	2340
p329c71.347	2340
p330c75.98	2340
p330c75.75	2340
p330c75.136	2340
p3334c67.24	2340
p3364c73.41	2340
p33840c54.1	2340
p3385c70.57	2340
p3517c78.9	2340
p3621c73.5	2340
p367c62.44	2340
p37404c69.203	2340
p37404c69.215	2340
p379c75.160	2340
p379c75.258	2340
p39c63.47	2340
p39c63.229	2340
p4035c66.18	2340
p4035c66.109	2340
p4193c54.1	2340
p4288c63.9	2340
p429c63.44	2340
p4347c73.25	2340
p440c72.329	2340
p441c78.4	2340
p4547c74.13	2340
p45c69.90	2340
p47c72.14	2340
p481c73.94	2340
p481c73.95	2340
p4865c77.1	2340
p1181c64.15	2340
p498c50.4	2340
p5120c62.16	2340
p51586c49.1	2340
p5365c60.13	2340
p543c70.211	2340
p543c70.191	2340
p543c70.190	2340
p589c77.13	2340
p621c60.66	2340
p638c73.329	2340
p644c67.26	2340
p644c67.99	2340
p66c69.35	2340
p66c69.92	2340
p675c59.45	2340
p6939c78.15	2340
p698c62.52	2340
p1215c59.114	2340
p735c63.63	2340
p735c63.55	2340
p735c63.68	2340
p758c62.72	2340
p759c76.70	2340
p770c72.73	2340
p773c66.26	2340
p1230c76.16	2340
p796c62.62	2340
p80c63.2	2340
p1243c71.2	2340
p833c63.145	2340
p840c69.71	2340
p840c69.99	2340
p845c60.18	2340
p847c78.3	2340
p124c71.167	2340
p883c68.28	2340
p883c68.29	2340
p884c71.77	2340
p884c71.76	2340
p8945c77.20	2340
p8945c77.34	2340
p124c71.312	2340
p124c71.187	2340
p924c64.66	2340
p947c59.25	2340
p9535c61.10	2340
p957c71.64	2340
p958c60.7	2340
p97380c81.54	2340
p978c41.1	2340
p97c59.20	2340
p1259c74.56	2340
p98c60.59	2340
p12660c38.1	2759
p1283c67.71	2759
p1283c67.6	2759
p1283c67.32	2759
p1284c68.23	2759
p128c64.220	2759
p128c64.65	2759
p128c64.63	2759
p1021c68.49	2759
p129c72.39	2759
p129c72.191	2759
p12c69.75	2759
p1025c65.30	2759
p1321c62.58	2759
p1337c60.34	2759
p1352c59.28	2759
p10336c42.16	2759
p138c61.99	2759
p138c61.138	2759
p10336c42.17	2759
p1391c61.161	2759
p1391c61.110	2759
p1391c61.119	2759
p1391c61.93	2759
p13984c45.1	2759
p1411c68.27	2759
p1415c66.20	2759
p1440c63.24	2759
p1440c63.174	2759
p1442c72.33	2759
p1442c72.34	2759
p1454c61.11	2759
p145c61.1	2759
[truncated: 75,233 more rows]

## Sheet: statistics
Number of assgned gene	MEGAN annotation taxon ID (NCBI taxon ID)	Txon name
36	1	root
1369	131567	root; cellular organisms
100	2	root; cellular organisms; Bacteria
14	1239	root; cellular organisms; Bacteria; Firmicutes
38	91061	root; cellular organisms; Bacteria; Firmicutes; Bacilli
46	1385	root; cellular organisms; Bacteria; Firmicutes; Bacilli; Bacillales
42	1224	root; cellular organisms; Bacteria; Proteobacteria
44	1236	root; cellular organisms; Bacteria; Proteobacteria; Gammaproteobacteria
111	32036	root; cellular organisms; Bacteria; Proteobacteria; Gammaproteobacteria; unclassified Gammaproteobacteria; sulfur-oxidizing symbionts
164	2340	root; cellular organisms; Bacteria; Proteobacteria; Gammaproteobacteria; unclassified Gammaproteobacteria; sulfur-oxidizing symbionts; Solemya velum gill symbiont
591	2759	root; cellular organisms; Eukaryota
151	33154	root; cellular organisms; Eukaryota; Opisthokonta
235	33208	root; cellular organisms; Eukaryota; Opisthokonta; Metazoa
2876	6072	root; cellular organisms; Eukaryota; Opisthokonta; Metazoa; Eumetazoa
7289	33213	root; cellular organisms; Eukaryota; Opisthokonta; Metazoa; Eumetazoa; Bilateria
128	33511	root; cellular organisms; Eukaryota; Opisthokonta; Metazoa; Eumetazoa; Bilateria; Deuterostomia
212	7711	root; cellular organisms; Eukaryota; Opisthokonta; Metazoa; Eumetazoa; Bilateria; Deuterostomia; Chordata
35	7737	root; cellular organisms; Eukaryota; Opisthokonta; Metazoa; Eumetazoa; Bilateria; Deuterostomia; Chordata; Cephalochordata; Branchiostomidae; Branchiostoma
53	7741	root; cellular organisms; Eukaryota; Opisthokonta; Metazoa; Eumetazoa; Bilateria; Deuterostomia; Chordata; Cephalochordata; Branchiostomidae; Branchiostoma; Branchiostoma belcheri
38	7776	root; cellular organisms; Eukaryota; Opisthokonta; Metazoa; Eumetazoa; Bilateria; Deuterostomia; Chordata; Craniata; Vertebrata; Gnathostomata
168	117571	root; cellular organisms; Eukaryota; Opisthokonta; Metazoa; Eumetazoa; Bilateria; Deuterostomia; Chordata; Craniata; Vertebrata; Gnathostomata; Teleostomi; Euteleostomi
3	41665	root; cellular organisms; Eukaryota; Opisthokonta; Metazoa; Eumetazoa; Bilateria; Deuterostomia; Chordata; Craniata; Vertebrata; Gnathostomata; Teleostomi; Euteleostomi; Actinopterygii; Actinopteri; Neopterygii
13	1489341	root; cellular organisms; Eukaryota; Opisthokonta; Metazoa; Eumetazoa; Bilateria; Deuterostomia; Chordata; Craniata; Vertebrata; Gnathostomata; Teleostomi; Euteleostomi; Actinopterygii; Actinopteri; Neopterygii; Teleostei; Osteoglossocephalai
118	186625	root; cellular organisms; Eukaryota; Opisthokonta; Metazoa; Eumetazoa; Bilateria; Deuterostomia; Chordata; Craniata; Vertebrata; Gnathostomata; Teleostomi; Euteleostomi; Actinopterygii; Actinopteri; Neopterygii; Teleostei; Osteoglossocephalai; Clupeocephala
13	1489388	root; cellular organisms; Eukaryota; Opisthokonta; Metazoa; Eumetazoa; Bilateria; Deuterostomia; Chordata; Craniata; Vertebrata; Gnathostomata; Teleostomi; Euteleostomi; Actinopterygii; Actinopteri; Neopterygii; Teleostei; Osteoglossocephalai; Clupeocephala; Euteleosteomorpha
90	1489872	root; cellular organisms; Eukaryota; Opisthokonta; Metazoa; Eumetazoa; Bilateria; Deuterostomia; Chordata; Craniata; Vertebrata; Gnathostomata; Teleostomi; Euteleostomi; Actinopterygii; Actinopteri; Neopterygii; Teleostei; Osteoglossocephalai; Clupeocephala; Euteleosteomorpha; Neoteleostei; Eurypterygia; Ctenosquamata; Acanthomorphata; Euacanthomorphacea; Percomorphaceae
61	1489908	root; cellular organisms; Eukaryota; Opisthokonta; Metazoa; Eumetazoa; Bilateria; Deuterostomia; Chordata; Craniata; Vertebrata; Gnathostomata; Teleostomi; Euteleostomi; Actinopterygii; Actinopteri; Neopterygii; Teleostei; Osteoglossocephalai; Clupeocephala; Euteleosteomorpha; Neoteleostei; Eurypterygia; Ctenosquamata; Acanthomorphata; Euacanthomorphacea; Percomorphaceae; Ovalentaria
17	504568	root; cellular organisms; Eukaryota; Opisthokonta; Metazoa; Eumetazoa; Bilateria; Deuterostomia; Chordata; Craniata; Vertebrata; Gnathostomata; Teleostomi; Euteleostomi; Actinopterygii; Actinopteri; Neopterygii; Teleostei; Osteoglossocephalai; Clupeocephala; Euteleosteomorpha; Protacanthopterygii; Salmoniformes; Salmonidae; Salmoninae
42	8030	root; cellular organisms; Eukaryota; Opisthokonta; Metazoa; Eumetazoa; Bilateria; Deuterostomia; Chordata; Craniata; Vertebrata; Gnathostomata; Teleostomi; Euteleostomi; Actinopterygii; Actinopteri; Neopterygii; Teleostei; Osteoglossocephalai; Clupeocephala; Euteleosteomorpha; Protacanthopterygii; Salmoniformes; Salmonidae; Salmoninae; Salmo; Salmo salar
14	186634	root; cellular organisms; Eukaryota; Opisthokonta; Metazoa; Eumetazoa; Bilateria; Deuterostomia; Chordata; Craniata; Vertebrata; Gnathostomata; Teleostomi; Euteleostomi; Actinopterygii; Actinopteri; Neopterygii; Teleostei; Osteoglossocephalai; Clupeocephala; Otomorpha
46	186626	root; cellular organisms; Eukaryota; Opisthokonta; Metazoa; Eumetazoa; Bilateria; Deuterostomia; Chordata; Craniata; Vertebrata; Gnathostomata; Teleostomi; Euteleostomi; Actinopterygii; Actinopteri; Neopterygii; Teleostei; Osteoglossocephalai; Clupeocephala; Otomorpha; Ostariophysi; Otophysa
43	8287	root; cellular organisms; Eukaryota; Opisthokonta; Metazoa; Eumetazoa; Bilateria; Deuterostomia; Chordata; Craniata; Vertebrata; Gnathostomata; Teleostomi; Euteleostomi; Sarcopterygii
22	32523	root; cellular organisms; Eukaryota; Opisthokonta; Metazoa; Eumetazoa; Bilateria; Deuterostomia; Chordata; Craniata; Vertebrata; Gnathostomata; Teleostomi; Euteleostomi; Sarcopterygii; Dipnotetrapodomorpha; Tetrapoda
33	32524	root; cellular organisms; Eukaryota; Opisthokonta; Metazoa; Eumetazoa; Bilateria; Deuterostomia; Chordata; Craniata; Vertebrata; Gnathostomata; Teleostomi; Euteleostomi; Sarcopterygii; Dipnotetrapodomorpha; Tetrapoda; Amniota
3	40674	root; cellular organisms; Eukaryota; Opisthokonta; Metazoa; Eumetazoa; Bilateria; Deuterostomia; Chordata; Craniata; Vertebrata; Gnathostomata; Teleostomi; Euteleostomi; Sarcopterygii; Dipnotetrapodomorpha; Tetrapoda; Amniota; Mammalia
16	32525	root; cellular organisms; Eukaryota; Opisthokonta; Metazoa; Eumetazoa; Bilateria; Deuterostomia; Chordata; Craniata; Vertebrata; Gnathostomata; Teleostomi; Euteleostomi; Sarcopterygii; Dipnotetrapodomorpha; Tetrapoda; Amniota; Mammalia; Theria
27	9347	root; cellular organisms; Eukaryota; Opisthokonta; Metazoa; Eumetazoa; Bilateria; Deuterostomia; Chordata; Craniata; Vertebrata; Gnathostomata; Teleostomi; Euteleostomi; Sarcopterygii; Dipnotetrapodomorpha; Tetrapoda; Amniota; Mammalia; Theria; Eutheria
79	1437010	root; cellular organisms; Eukaryota; Opisthokonta; Metazoa; Eumetazoa; Bilateria; Deuterostomia; Chordata; Craniata; Vertebrata; Gnathostomata; Teleostomi; Euteleostomi; Sarcopterygii; Dipnotetrapodomorpha; Tetrapoda; Amniota; Mammalia; Theria; Eutheria; Boreoeutheria
3	32561	root; cellular organisms; Eukaryota; Opisthokonta; Metazoa; Eumetazoa; Bilateria; Deuterostomia; Chordata; Craniata; Vertebrata; Gnathostomata; Teleostomi; Euteleostomi; Sarcopterygii; Dipnotetrapodomorpha; Tetrapoda; Amniota; Sauropsida; Sauria
13	1329799	root; cellular organisms; Eukaryota; Opisthokonta; Metazoa; Eumetazoa; Bilateria; Deuterostomia; Chordata; Craniata; Vertebrata; Gnathostomata; Teleostomi; Euteleostomi; Sarcopterygii; Dipnotetrapodomorpha; Tetrapoda; Amniota; Sauropsida; Sauria; Archelosauria
43	8492	root; cellular organisms; Eukaryota; Opisthokonta; Metazoa; Eumetazoa; Bilateria; Deuterostomia; Chordata; Craniata; Vertebrata; Gnathostomata; Teleostomi; Euteleostomi; Sarcopterygii; Dipnotetrapodomorpha; Tetrapoda; Amniota; Sauropsida; Sauria; Archelosauria; Archosauria
130	7668	root; cellular organisms; Eukaryota; Opisthokonta; Metazoa; Eumetazoa; Bilateria; Deuterostomia; Echinodermata; Eleutherozoa; Echinozoa; Echinoidea; Euechinoidea; Echinacea; Echinoida; Strongylocentrotidae; Strongylocentrotus; Strongylocentrotus purpuratus
43	10224	root; cellular organisms; Eukaryota; Opisthokonta; Metazoa; Eumetazoa; Bilateria; Deuterostomia; Hemichordata; Enteropneusta; Harrimaniidae; Saccoglossus; Saccoglossus kowalevskii
2069	33317	root; cellular organisms; Eukaryota; Opisthokonta; Metazoa; Eumetazoa; Bilateria; Protostomia
590	1206794	root; cellular organisms; Eukaryota; Opisthokonta; Metazoa; Eumetazoa; Bilateria; Protostomia; Ecdysozoa
629	6656	root; cellular organisms; Eukaryota; Opisthokonta; Metazoa; Eumetazoa; Bilateria; Protostomia; Ecdysozoa; Panarthropoda; Arthropoda
15	6843	root; cellular organisms; Eukaryota; Opisthokonta; Metazoa; Eumetazoa; Bilateria; Protostomia; Ecdysozoa; Panarthropoda; Arthropoda; Chelicerata
99	6850	root; cellular organisms; Eukaryota; Opisthokonta; Metazoa; Eumetazoa; Bilateria; Protostomia; Ecdysozoa; Panarthropoda; Arthropoda; Chelicerata; Merostomata; Xiphosura; Limulidae; Limulus; Limulus polyphemus
60	197562	root; cellular organisms; Eukaryota; Opisthokonta; Metazoa; Eumetazoa; Bilateria; Protostomia; Ecdysozoa; Panarthropoda; Arthropoda; Mandibulata; Pancrustacea
277	33340	root; cellular organisms; Eukaryota; Opisthokonta; Metazoa; Eumetazoa; Bilateria; Protostomia; Ecdysozoa; Panarthropoda; Arthropoda; Mandibulata; Pancrustacea; Hexapoda; Insecta; Dicondylia; Pterygota; Neoptera
331	33392	root; cellular organisms; Eukaryota; Opisthokonta; Metazoa; Eumetazoa; Bilateria; Protostomia; Ecdysozoa; Panarthropoda; Arthropoda; Mandibulata; Pancrustacea; Hexapoda; Insecta; Dicondylia; Pterygota; Neoptera; Endopterygota
7	37567	root; cellular organisms; Eukaryota; Opisthokonta; Metazoa; Eumetazoa; Bilateria; Protostomia; Ecdysozoa; Panarthropoda; Arthropoda; Mandibulata; Pancrustacea; Hexapoda; Insecta; Dicondylia; Pterygota; Neoptera; Endopterygota; Amphiesmenoptera; Lepidoptera; Glossata; Neolepidoptera; Heteroneura; Ditrysia
12	104431	root; cellular organisms; Eukaryota; Opisthokonta; Metazoa; Eumetazoa; Bilateria; Protostomia; Ecdysozoa; Panarthropoda; Arthropoda; Mandibulata; Pancrustacea; Hexapoda; Insecta; Dicondylia; Pterygota; Neoptera; Endopterygota; Amphiesmenoptera; Lepidoptera; Glossata; Neolepidoptera; Heteroneura; Ditrysia; Obtectomera
42	7145	root; cellular organisms; Eukaryota; Opisthokonta; Metazoa; Eumetazoa; Bilateria; Protostomia; Ecdysozoa; Panarthropoda; Arthropoda; Mandibulata; Pancrustacea; Hexapoda; Insecta; Dicondylia; Pterygota; Neoptera; Endopterygota; Amphiesmenoptera; Lepidoptera; Glossata; Neolepidoptera; Heteroneura; Ditrysia; Obtectomera; Papilionoidea; Papilionidae; Papilioninae; Papilionini; Papilio
49	7147	root; cellular organisms; Eukaryota; Opisthokonta; Metazoa; Eumetazoa; Bilateria; Protostomia; Ecdysozoa; Panarthropoda; Arthropoda; Mandibulata; Pancrustacea; Hexapoda; Insecta; Dicondylia; Pterygota; Neoptera; Endopterygota; Diptera
11	7399	root; cellular organisms; Eukaryota; Opisthokonta; Metazoa; Eumetazoa; Bilateria; Protostomia; Ecdysozoa; Panarthropoda; Arthropoda; Mandibulata; Pancrustacea; Hexapoda; Insecta; Dicondylia; Pterygota; Neoptera; Endopterygota; Hymenoptera
10	7400	root; cellular organisms; Eukaryota; Opisthokonta; Metazoa; Eumetazoa; Bilateria; Protostomia; Ecdysozoa; Panarthropoda; Arthropoda; Mandibulata; Pancrustacea; Hexapoda; Insecta; Dicondylia; Pterygota; Neoptera; Endopterygota; Hymenoptera; Apocrita
69	7434	root; cellular organisms; Eukaryota; Opisthokonta; Metazoa; Eumetazoa; Bilateria; Protostomia; Ecdysozoa; Panarthropoda; Arthropoda; Mandibulata; Pancrustacea; Hexapoda; Insecta; Dicondylia; Pterygota; Neoptera; Endopterygota; Hymenoptera; Apocrita; Aculeata
1	33342	root; cellular organisms; Eukaryota; Opisthokonta; Metazoa; Eumetazoa; Bilateria; Protostomia; Ecdysozoa; Panarthropoda; Arthropoda; Mandibulata; Pancrustacea; Hexapoda; Insecta; Dicondylia; Pterygota; Neoptera; Paraneoptera
3	7524	root; cellular organisms; Eukaryota; Opisthokonta; Metazoa; Eumetazoa; Bilateria; Protostomia; Ecdysozoa; Panarthropoda; Arthropoda; Mandibulata; Pancrustacea; Hexapoda; Insecta; Dicondylia; Pterygota; Neoptera; Paraneoptera; Hemiptera
25	33373	root; cellular organisms; Eukaryota; Opisthokonta; Metazoa; Eumetazoa; Bilateria; Protostomia; Ecdysozoa; Panarthropoda; Arthropoda; Mandibulata; Pancrustacea; Hexapoda; Insecta; Dicondylia; Pterygota; Neoptera; Paraneoptera; Hemiptera; Sternorrhyncha
53	121845	root; cellular organisms; Eukaryota; Opisthokonta; Metazoa; Eumetazoa; Bilateria; Protostomia; Ecdysozoa; Panarthropoda; Arthropoda; Mandibulata; Pancrustacea; Hexapoda; Insecta; Dicondylia; Pterygota; Neoptera; Paraneoptera; Hemiptera; Sternorrhyncha; Psylliformes; Psylloidea; Psyllidae; Diaphorina; Diaphorina citri
234	37621	root; cellular organisms; Eukaryota; Opisthokonta; Metazoa; Eumetazoa; Bilateria; Protostomia; Ecdysozoa; Scalidophora; Priapulida; Priapulidae; Priapulus; Priapulus caudatus
979	1206795	root; cellular organisms; Eukaryota; Opisthokonta; Metazoa; Eumetazoa; Bilateria; Protostomia; Lophotrochozoa
197	6412	root; cellular organisms; Eukaryota; Opisthokonta; Metazoa; Eumetazoa; Bilateria; Protostomia; Lophotrochozoa; Annelida; Clitellata; Hirudinida; Hirudinea; Rhynchobdellida; Glossiphoniidae; Helobdella; Helobdella robusta
155	7574	root; cellular organisms; Eukaryota; Opisthokonta; Metazoa; Eumetazoa; Bilateria; Protostomia; Lophotrochozoa; Brachiopoda; Linguliformea; Lingulata; Lingulida; Linguloidea; Lingulidae; Lingula; Lingula anatina
2500	6447	root; cellular organisms; Eukaryota; Opisthokonta; Metazoa; Eumetazoa; Bilateria; Protostomia; Lophotrochozoa; Mollusca
67	6545	root; cellular organisms; Eukaryota; Opisthokonta; Metazoa; Eumetazoa; Bilateria; Protostomia; Lophotrochozoa; Mollusca; Bivalvia; Pteriomorphia
59	29159	root; cellular organisms; Eukaryota; Opisthokonta; Metazoa; Eumetazoa; Bilateria; Protostomia; Lophotrochozoa; Mollusca; Bivalvia; Pteriomorphia; Ostreoida; Ostreoidea; Ostreidae; Crassostrea; Crassostrea gigas
81	6573	root; cellular organisms; Eukaryota; Opisthokonta; Metazoa; Eumetazoa; Bilateria; Protostomia; Lophotrochozoa; Mollusca; Bivalvia; Pteriomorphia; Pectinoida; Pectinoidea; Pectinidae; Mizuhopecten; Mizuhopecten yessoensis
809	6448	root; cellular organisms; Eukaryota; Opisthokonta; Metazoa; Eumetazoa; Bilateria; Protostomia; Lophotrochozoa; Mollusca; Gastropoda
7479	216307	root; cellular organisms; Eukaryota; Opisthokonta; Metazoa; Eumetazoa; Bilateria; Protostomia; Lophotrochozoa; Mollusca; Gastropoda; Heterobranchia; Euthyneura <gastropod>
6268	6500	root; cellular organisms; Eukaryota; Opisthokonta; Metazoa; Eumetazoa; Bilateria; Protostomia; Lophotrochozoa; Mollusca; Gastropoda; Heterobranchia; Euthyneura <gastropod>; Euopisthobranchia; Aplysiomorpha; Aplysioidea; Aplysiidae; Aplysia; Aplysia californica
1907	6526	root; cellular organisms; Eukaryota; Opisthokonta; Metazoa; Eumetazoa; Bilateria; Protostomia; Lophotrochozoa; Mollusca; Gastropoda; Heterobranchia; Euthyneura <gastropod>; Panpulmonata; Hygrophila <snail>; Planorboidea; Planorbidae; Biomphalaria; Biomphalaria glabrata
165	225164	root; cellular organisms; Eukaryota; Opisthokonta; Metazoa; Eumetazoa; Bilateria; Protostomia; Lophotrochozoa; Mollusca; Gastropoda; Patellogastropoda; Lottioidea; Lottiidae; Lottia; Lottia gigantea
18	6073	root; cellular organisms; Eukaryota; Opisthokonta; Metazoa; Eumetazoa; Cnidaria
3	6102	root; cellular organisms; Eukaryota; Opisthokonta; Metazoa; Eumetazoa; Cnidaria; Anthozoa; Hexacorallia
55	45351	root; cellular organisms; Eukaryota; Opisthokonta; Metazoa; Eumetazoa; Cnidaria; Anthozoa; Hexacorallia; Actiniaria; Edwardsiidae; Nematostella; Nematostella vectensis
51	70779	root; cellular organisms; Eukaryota; Opisthokonta; Metazoa; Eumetazoa; Cnidaria; Anthozoa; Hexacorallia; Scleractinia; Astrocoeniina; Acroporidae; Acropora; Acropora digitifera
126	6087	root; cellular organisms; Eukaryota; Opisthokonta; Metazoa; Eumetazoa; Cnidaria; Hydrozoa; Hydroidolina; Anthoathecata; Aplanulata; Hydridae; Hydra; Hydra vulgaris
1	33634	root; cellular organisms; Eukaryota; Stramenopiles
61	4762	root; cellular organisms; Eukaryota; Stramenopiles; Oomycetes
290	-2	root; Not assigned
36761	-1	root; No hits;
