# Supplementary material for: Chloroplast acquisition without the gene transfer in kleptoplastic sea slugs, Plakobranchus ocellatus
Source: eLife journal article supplement (doi:10.7554/elife.60176), 2021-04-26
Supplement: supp21 [file all_data_plot.pdf › Supplementary_file_21/all_data_plot.pdf]

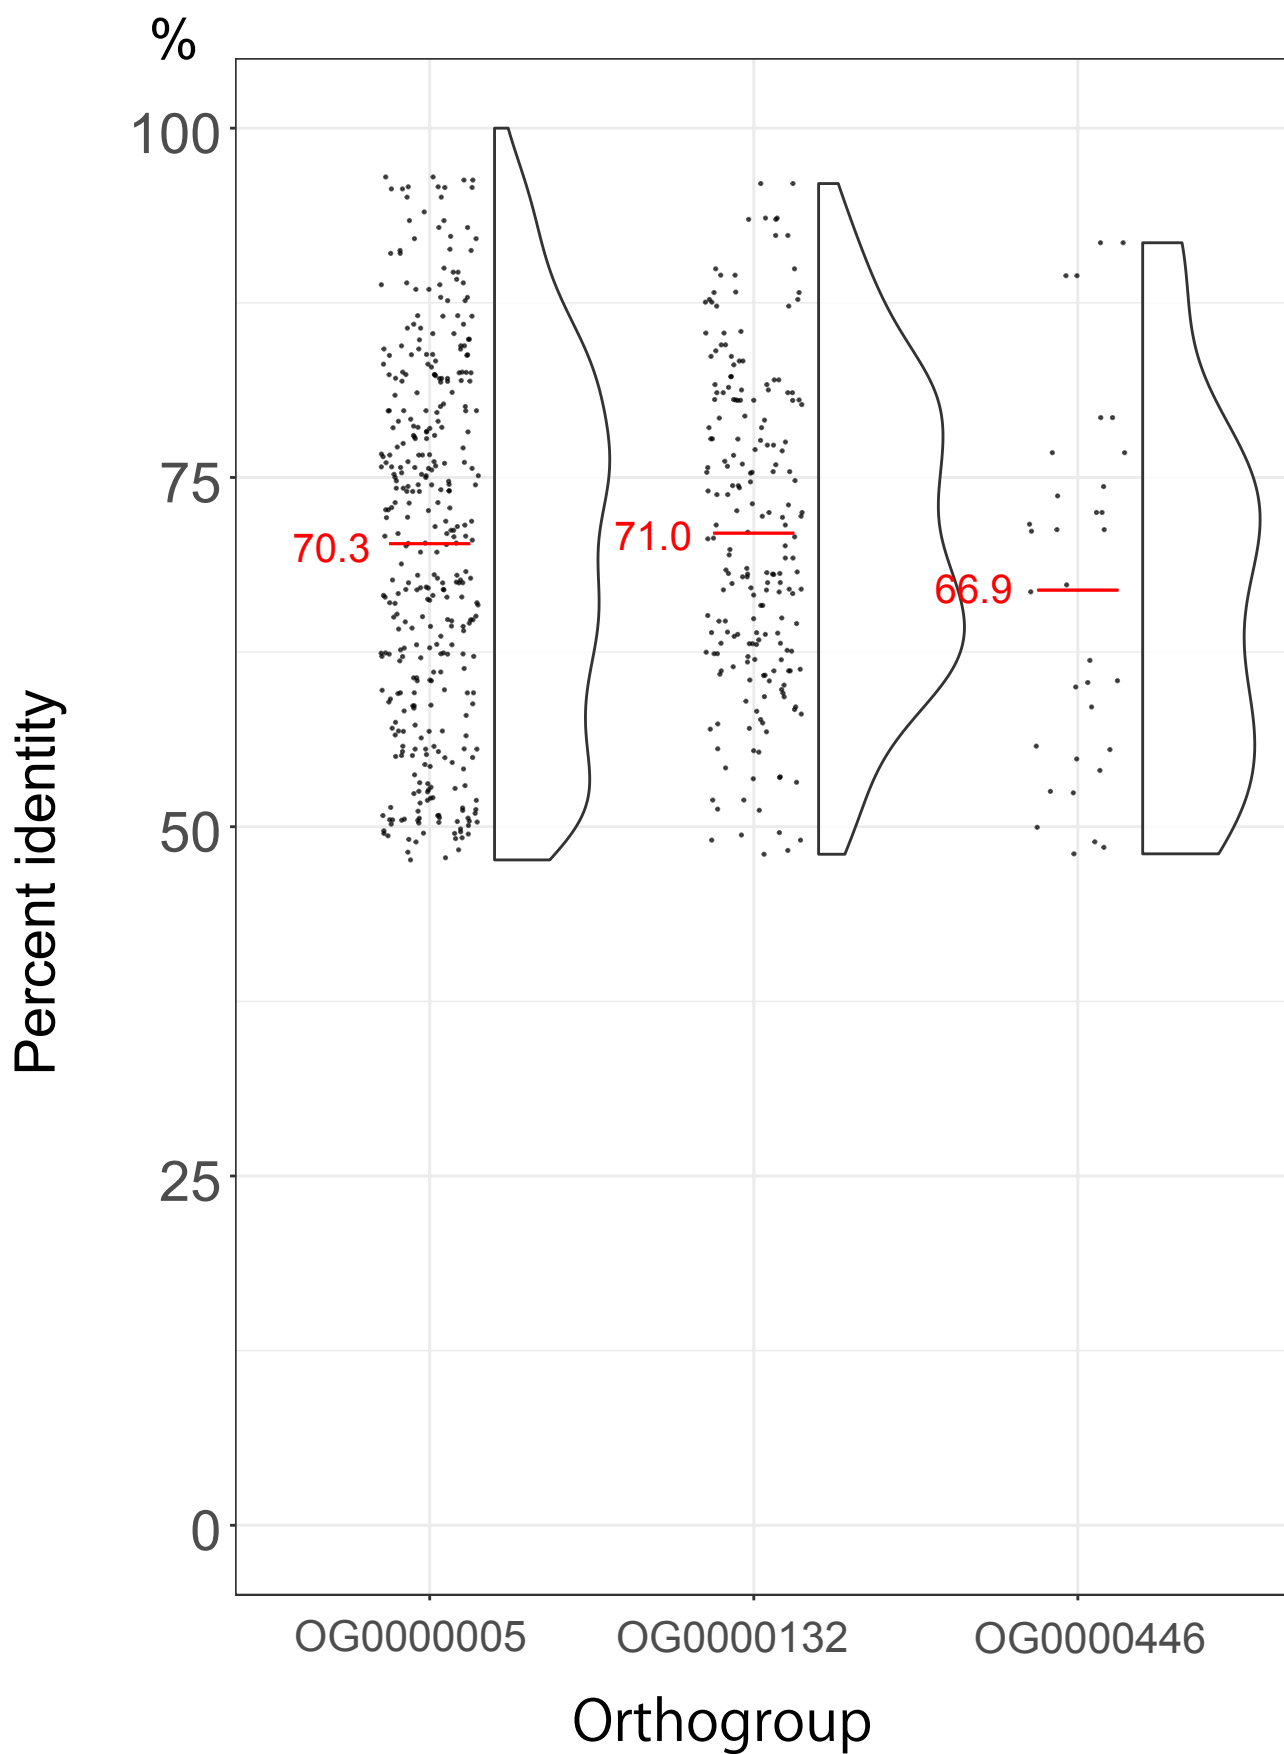

**Pairwise percent simirality of the ortholgourp having KRM candidates.**

Each dot indicates the pairwise percent similarity of sequences in each orthogroup  
Red line, the mean value of the similarity. The Violin plot shows the distribution of the similarity.
